# Supplementary material for: First profiling of lysine crotonylation of myofilament proteins and ribosomal proteins in zebrafish embryos
Source: PubMed Central journal article supplement (PMC5827021; doi:10.1038/s41598-018-22069-3), 2018-02-26
Supplement: 41598_2018_22069_MOESM1_ESM.pdf [file 41598_2018_22069_MOESM1_ESM.pdf]

Supplemental information

**First profiling of lysine crotonylation of myofilament proteins and ribosomal proteins in zebrafish embryos**

Oh Kwang Kwon<sup>#</sup>, Sun Joo Kim, Sangkyu Lee<sup>\*</sup>

<sup>1</sup>BK21 Plus KNU Multi-Omics based Creative Drug Research Team, College of Pharmacy, Research Institute of Pharmaceutical Sciences, Kyungpook National University, Daegu 41566, Republic of Korea

<sup>\*</sup>Correspondence: Sangkyu Lee, Ph.D., Professor, College of Pharmacy, Research Institute of Pharmaceutical Sciences, Kyungpook National University, 80 Daehak-ro, Buk-gu 41566, Republic of Korea. Tel.: +82-53-950 8571; Fax: +82-53-950-8557; E-mail: sangkyu@knu.ac.kr.

## **Supplementary Table Legends**

**Supplemental Table S1.** List of all identified lysine crotonylation in zebrafish embryos.

**Supplemental Table S2.** Crotonylated protein and sites homology between Zebrafish and human by BLASTP.

## Supplementary Figure Legends

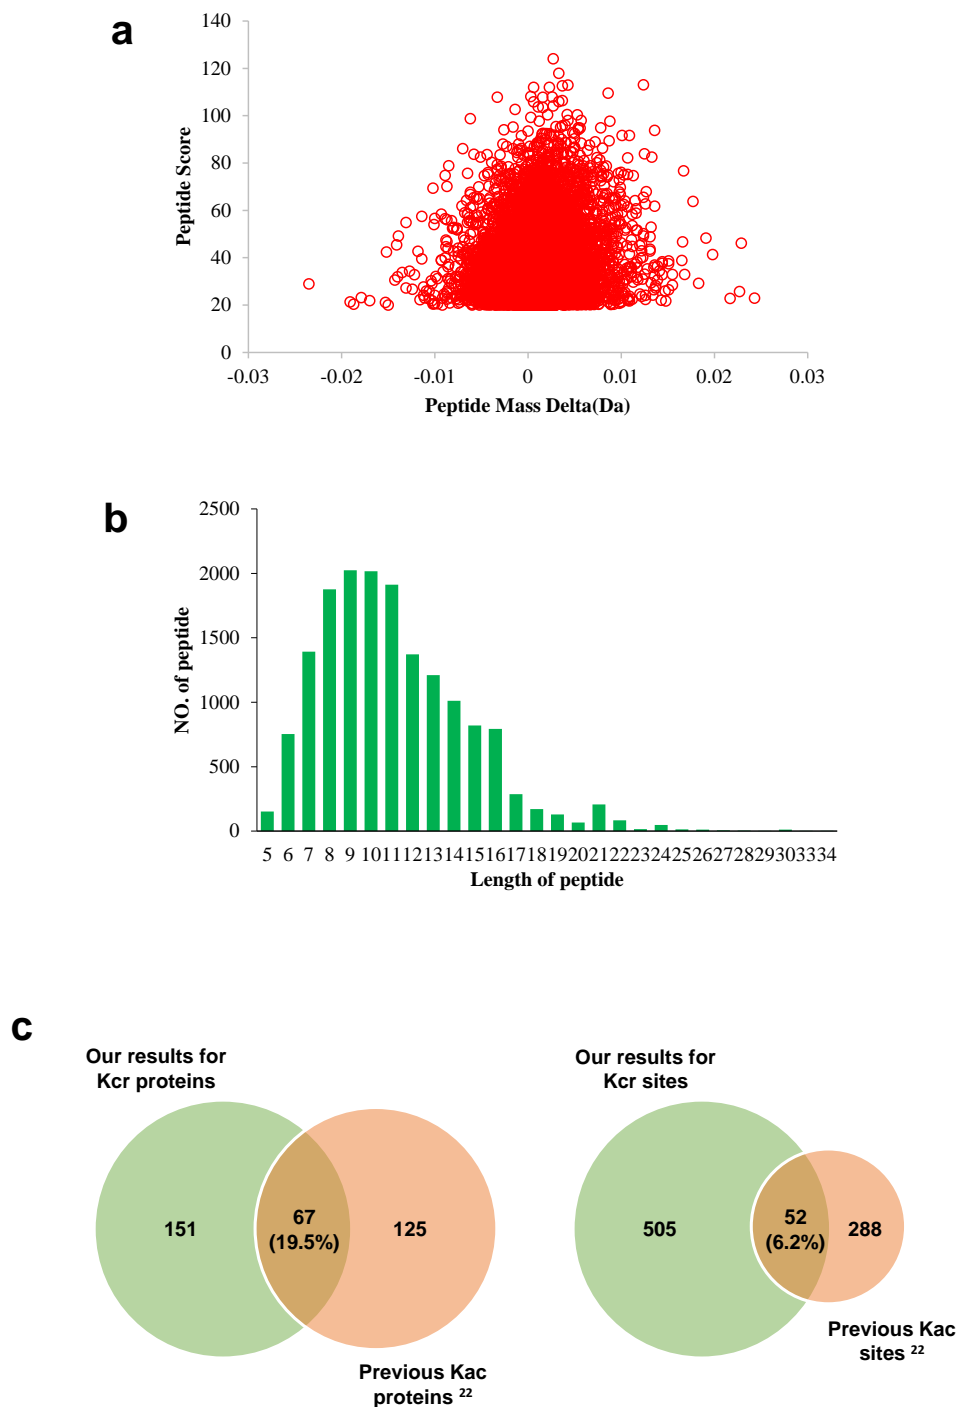

**Supplementary Fig S1. QC validation of MS data and comparison between Kcr and Kac in zebrafish.** (A) Distribution of mass error for precursor ions. (B) Peptide length distribution of identified crotonylated peptides. (C) Comparison of proteins and sites between current Kcr results and previous Kac results in zebrafish.

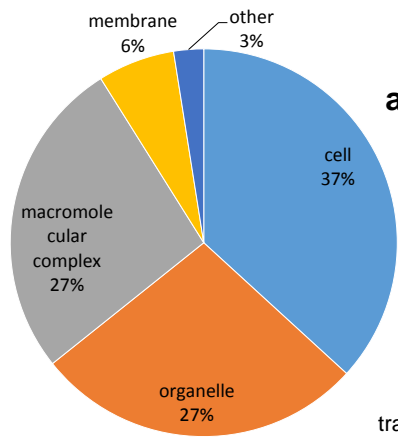

**b. Molecular function**

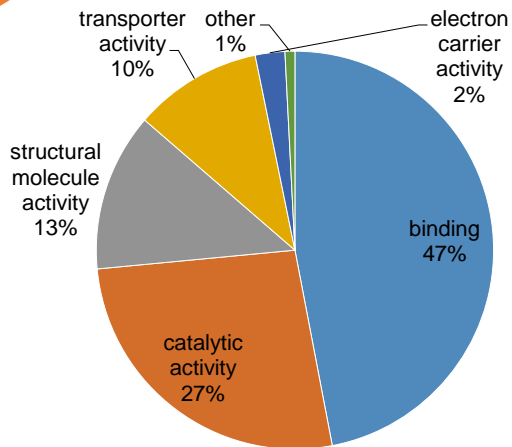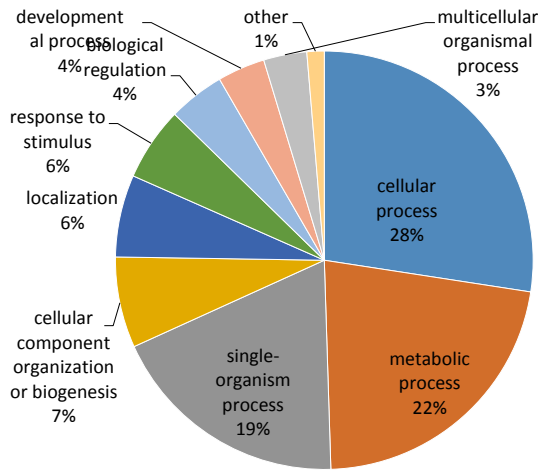

#### d. Subcellular location

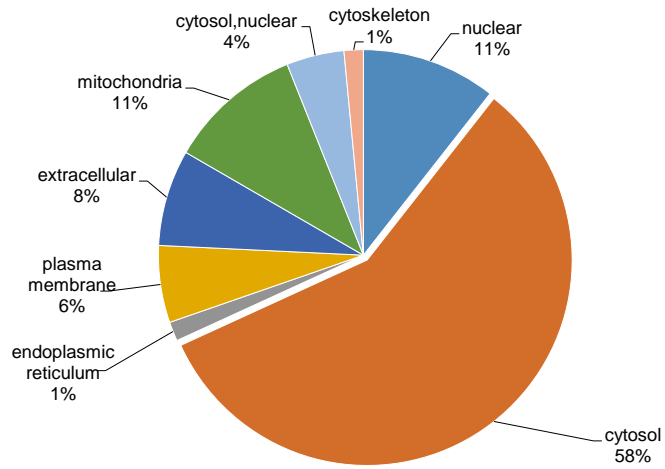

**Supplementary Fig S2. GO-based annotation analysis of identified crotonylated proteins in zebrafish larvae.** (A) Biological process (B), Molecular function, (C) Subcellular location, (D) Subcellular location.



**C**

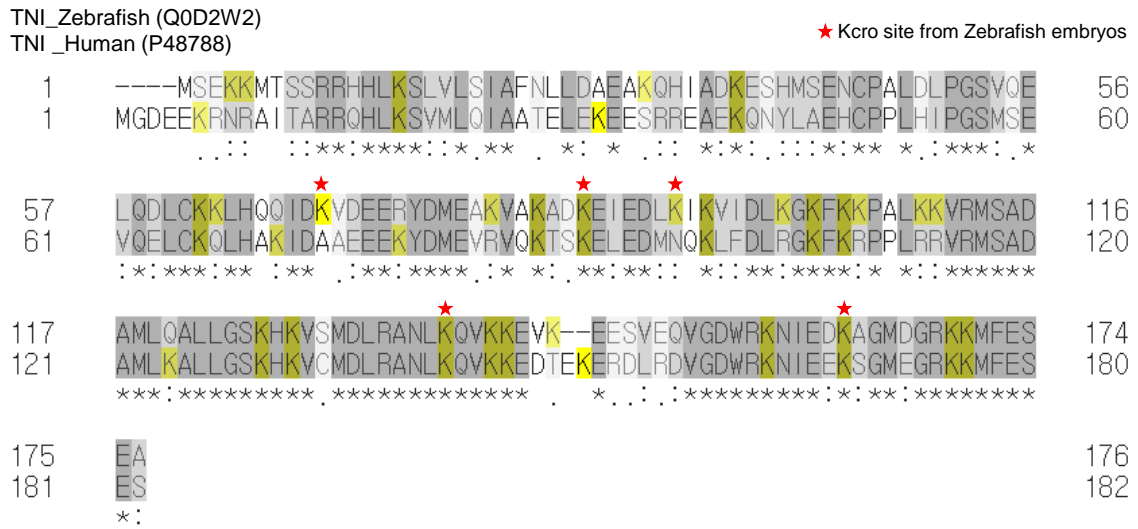

**d**

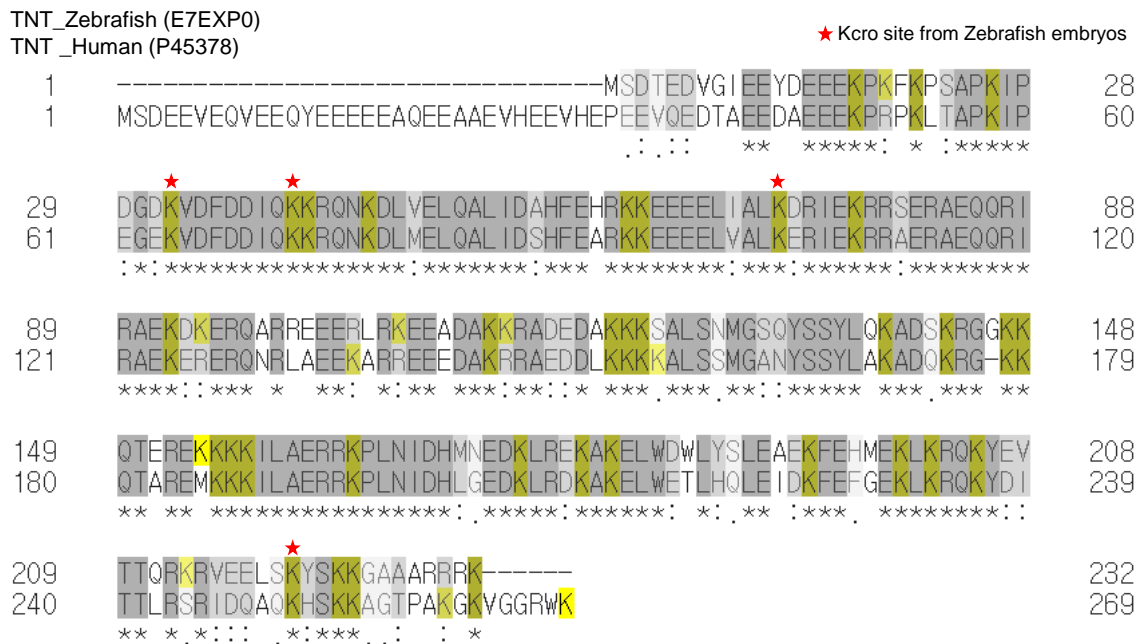

**Supplementary Fig S3. Sequence alignment of crotonylated myosin between zebrafish and humans. (A) Crotonylated myosin light chain, (B) Tropomyosin (C) Troponin I, (D) Troponin T.**





|        |         |                         |                            |      |   |                 |                 |         |                                                                                                                                                                                                                                                                                                                                                                                                                                                                                                                                                                                                                                                                                                                                                                  |                                                                                                                                                                                                                                                                                                                                                                                                                                                                                                                                                                                                                                                                                                                                                                                         |                                                                                                                                                                                                             |                         |                                                    |                                                        |                                                                                                                                                                    |
|--------|---------|-------------------------|----------------------------|------|---|-----------------|-----------------|---------|------------------------------------------------------------------------------------------------------------------------------------------------------------------------------------------------------------------------------------------------------------------------------------------------------------------------------------------------------------------------------------------------------------------------------------------------------------------------------------------------------------------------------------------------------------------------------------------------------------------------------------------------------------------------------------------------------------------------------------------------------------------|-----------------------------------------------------------------------------------------------------------------------------------------------------------------------------------------------------------------------------------------------------------------------------------------------------------------------------------------------------------------------------------------------------------------------------------------------------------------------------------------------------------------------------------------------------------------------------------------------------------------------------------------------------------------------------------------------------------------------------------------------------------------------------------------|-------------------------------------------------------------------------------------------------------------------------------------------------------------------------------------------------------------|-------------------------|----------------------------------------------------|--------------------------------------------------------|--------------------------------------------------------------------------------------------------------------------------------------------------------------------|
| B8A561 | myzh1.2 | Uncharacterized protein | ...LAEK(cr)DEEIQK(cr)R_    | 1589 | 2 | DEEIQKRNSORIT   | ...E...K.E..... | nuclear | intracellular organelle; intracellular non-membrane-bounded organelle; cytoskeleton part; intracellular organelle part; macromolecular complex; intracellular part; cell; actin cytoskeleton; organelle part; non-membrane-bounded organelle; organelle; cytoskeleton; cell part; intracellular; myosin complex; protein complex;                                                                                                                                                                                                                                                                                                                                                                                                                                | ATP binding; motor activity; nucleoside phosphate binding; nucleoside binding; ion binding; hydrolase activity, acting on acid anhydrides; hydrolase activity; nucleotide binding; nucleoside-triphosphatase activity; organic cyclic compound binding; heterocyclic compound binding; ribonucleoside binding; carbohydrate derivative binding; pyrophosphatase activity; catalytic activity; ribonucleotide binding; binding; purine ribonucleoside binding; anion binding; purine ribonucleotide binding; adenylyl ribonucleotide binding; adenylyl nucleotide binding; purine nucleoside binding; hydrolase activity, acting on acid anhydrides, in phosphorus-containing anhydrides; purine nucleotide binding; small molecule binding; purine ribonucleoside triphosphate binding; | K10352                                                                                                                                                                                                      | MYH; myosin heavy chain | dre04530 Tight junction - Danio rerio (zebrafish); | IPR002928; IPR004009; IPR001609; IPR027417; IPR027401; | Myosin tail; Myosin, N-terminal, SH3-like; Myosin head, motor domain; P-loop containing nucleoside triphosphate hydrolase; Myosin-like IQ motif-containing domain; |
| B8A561 | myzh1.2 | Uncharacterized protein | ...K(cr)LAEK(cr)DEEIQK_    | 1577 | 2 | VKSEIDRKLAEKDEE |                 | nuclear | intracellular organelle; intracellular non-membrane-bounded organelle; cytoskeleton part; intracellular organelle part; macromolecular complex; intracellular part; cell; actin cytoskeleton; organelle part; non-membrane-bounded organelle; organelle; cytoskeleton; cell part; intracellular; myosin complex; protein complex;                                                                                                                                                                                                                                                                                                                                                                                                                                | ATP binding; motor activity; nucleoside phosphate binding; nucleoside binding; ion binding; hydrolase activity, acting on acid anhydrides; hydrolase activity; nucleotide binding; nucleoside-triphosphatase activity; organic cyclic compound binding; heterocyclic compound binding; ribonucleoside binding; carbohydrate derivative binding; pyrophosphatase activity; catalytic activity; ribonucleotide binding; binding; purine ribonucleoside binding; anion binding; purine ribonucleotide binding; adenylyl ribonucleotide binding; adenylyl nucleotide binding; purine nucleoside binding; hydrolase activity, acting on acid anhydrides, in phosphorus-containing anhydrides; purine nucleotide binding; small molecule binding; purine ribonucleoside triphosphate binding; | K10352                                                                                                                                                                                                      | MYH; myosin heavy chain | dre04530 Tight junction - Danio rerio (zebrafish); | IPR002928; IPR004009; IPR001609; IPR027417; IPR027401; | Myosin tail; Myosin, N-terminal, SH3-like; Myosin head, motor domain; P-loop containing nucleoside triphosphate hydrolase; Myosin-like IQ motif-containing domain; |
| B8A561 | myzh1.2 | Uncharacterized protein | ...K(cr)LAEK(cr)DEEIQK_    | 1581 | 2 | IDRKLAEKDEEIQI  | .....K.E.....   | nuclear | intracellular organelle; intracellular non-membrane-bounded organelle; cytoskeleton part; intracellular organelle part; macromolecular complex; intracellular part; cell; actin cytoskeleton; organelle part; non-membrane-bounded organelle; organelle; cytoskeleton; cell part; intracellular; myosin complex; protein complex;                                                                                                                                                                                                                                                                                                                                                                                                                                | ATP binding; motor activity; nucleoside phosphate binding; nucleoside binding; ion binding; hydrolase activity, acting on acid anhydrides; hydrolase activity; nucleotide binding; nucleoside-triphosphatase activity; organic cyclic compound binding; heterocyclic compound binding; ribonucleoside binding; carbohydrate derivative binding; pyrophosphatase activity; catalytic activity; ribonucleotide binding; binding; purine ribonucleoside binding; anion binding; purine ribonucleotide binding; adenylyl ribonucleotide binding; adenylyl nucleotide binding; purine nucleoside binding; hydrolase activity, acting on acid anhydrides, in phosphorus-containing anhydrides; purine nucleotide binding; small molecule binding; purine ribonucleoside triphosphate binding; | K10352                                                                                                                                                                                                      | MYH; myosin heavy chain | dre04530 Tight junction - Danio rerio (zebrafish); | IPR002928; IPR004009; IPR001609; IPR027417; IPR027401; | Myosin tail; Myosin, N-terminal, SH3-like; Myosin head, motor domain; P-loop containing nucleoside triphosphate hydrolase; Myosin-like IQ motif-containing domain; |
| B8A561 | myzh1.2 | Uncharacterized protein | ...GK(cr)QAFTQIQEELK(cr)R_ | 1307 | 2 | VSQLTRGKQAFTQIQ |                 | nuclear | intracellular organelle; intracellular non-membrane-bounded organelle; cytoskeleton part; intracellular organelle part; macromolecular complex; intracellular part; cell; actin cytoskeleton; organelle part; non-membrane-bounded organelle; organelle; cytoskeleton; cell part; intracellular; myosin complex; protein complex;                                                                                                                                                                                                                                                                                                                                                                                                                                | ATP binding; motor activity; nucleoside phosphate binding; nucleoside binding; ion binding; hydrolase activity, acting on acid anhydrides; hydrolase activity; nucleotide binding; nucleoside-triphosphatase activity; organic cyclic compound binding; heterocyclic compound binding; ribonucleoside binding; carbohydrate derivative binding; pyrophosphatase activity; catalytic activity; ribonucleotide binding; binding; purine ribonucleoside binding; anion binding; purine ribonucleotide binding; adenylyl ribonucleotide binding; adenylyl nucleotide binding; purine nucleoside binding; hydrolase activity, acting on acid anhydrides, in phosphorus-containing anhydrides; purine nucleotide binding; small molecule binding; purine ribonucleoside triphosphate binding; | K10352                                                                                                                                                                                                      | MYH; myosin heavy chain | dre04530 Tight junction - Danio rerio (zebrafish); | IPR002928; IPR004009; IPR001609; IPR027417; IPR027401; | Myosin tail; Myosin, N-terminal, SH3-like; Myosin head, motor domain; P-loop containing nucleoside triphosphate hydrolase; Myosin-like IQ motif-containing domain; |
| B8A561 | myzh1.2 | Uncharacterized protein | ...GK(cr)QAFTQIQEELK(cr)R_ | 1318 | 2 | TQIQEELKQIQEEV  |                 | nuclear | intracellular organelle; intracellular non-membrane-bounded organelle; cytoskeleton part; intracellular organelle part; macromolecular complex; intracellular part; cell; actin cytoskeleton; organelle part; non-membrane-bounded organelle; organelle; cytoskeleton; cell part; intracellular; myosin complex; protein complex;                                                                                                                                                                                                                                                                                                                                                                                                                                | ATP binding; motor activity; nucleoside phosphate binding; nucleoside binding; ion binding; hydrolase activity, acting on acid anhydrides; hydrolase activity; nucleotide binding; nucleoside-triphosphatase activity; organic cyclic compound binding; heterocyclic compound binding; ribonucleoside binding; carbohydrate derivative binding; pyrophosphatase activity; catalytic activity; ribonucleotide binding; binding; purine ribonucleoside binding; anion binding; purine ribonucleotide binding; adenylyl ribonucleotide binding; adenylyl nucleotide binding; purine nucleoside binding; hydrolase activity, acting on acid anhydrides, in phosphorus-containing anhydrides; purine nucleotide binding; small molecule binding; purine ribonucleoside triphosphate binding; | K10352                                                                                                                                                                                                      | MYH; myosin heavy chain | dre04530 Tight junction - Danio rerio (zebrafish); | IPR002928; IPR004009; IPR001609; IPR027417; IPR027401; | Myosin tail; Myosin, N-terminal, SH3-like; Myosin head, motor domain; P-loop containing nucleoside triphosphate hydrolase; Myosin-like IQ motif-containing domain; |
| E9QJ6  | eno3    | Enolase                 | ...(ac)SISK(cr)IHAR_       | 5    | 1 | __MSISKHARELD   |                 | cytosol | single-organism carbohydrate catabolic process; glycolytic process; single-organism catabolic process; small molecule metabolic process; single-organism cellular process; single-organism process; carbohydrate metabolic process; primary metabolic process; cellular metabolic process; organic substance metabolic process; carbohydrate catabolic process; single-organism carbohydrate metabolic process; organic substance catabolic process; metabolic process; pyruvate metabolic process; generation of precursor metabolites and energy; single-organism metabolic process; carboxylic acid metabolic process; monocarboxylic acid metabolic process; organic acid metabolic process; cellular process; catabolic process; oxoacid metabolic process; | catalytic complex; cell part; intracellular; cytoplasm; macromolecular complex; intracellular part; cytosolic part; cell; cytosol; protein complex; phosphopyruvate hydratase complex; cytoplasmic part;                                                                                                                                                                                                                                                                                                                                                                                                                                                                                                                                                                                | magnesium ion binding; phosphopyruvate hydratase activity; catalytic activity; binding; ion binding; metal ion binding; cation binding; lyase activity; hydro-lyase activity; carbon-oxygen lyase activity; |                         |                                                    | IPR029065; IPR029017; IPR020810; IPR020811;            | Enolase C-terminal domain-like; Enolase N-terminal domain-like; Enolase, C-terminal; Enolase, N-terminal;                                                          |

|        |       |                                          |                        |      |   |                              |                 |                                                                                                                                                                                                                                                                                                                                                                                                                                                                                                                                                                                                                                                                                                                           |                                                                                                                                                                                                                                                                 |                                                                                                                                                                                                                                                                                                                                                                                                                                                      |        |                                                                                     |                                                                                                                                                |                                                                                                                                                     |
|--------|-------|------------------------------------------|------------------------|------|---|------------------------------|-----------------|---------------------------------------------------------------------------------------------------------------------------------------------------------------------------------------------------------------------------------------------------------------------------------------------------------------------------------------------------------------------------------------------------------------------------------------------------------------------------------------------------------------------------------------------------------------------------------------------------------------------------------------------------------------------------------------------------------------------------|-----------------------------------------------------------------------------------------------------------------------------------------------------------------------------------------------------------------------------------------------------------------|------------------------------------------------------------------------------------------------------------------------------------------------------------------------------------------------------------------------------------------------------------------------------------------------------------------------------------------------------------------------------------------------------------------------------------------------------|--------|-------------------------------------------------------------------------------------|------------------------------------------------------------------------------------------------------------------------------------------------|-----------------------------------------------------------------------------------------------------------------------------------------------------|
| O42363 | apoa1 | Apolipoprotein A-I                       | ..AALVYLNQVK(cr)DQAEK_ | 44   | 1 | LVLVNLQVKDQAEKAL             | extracellular   | cholesterol metabolic process; lipid transport; organic hydroxy compound metabolic process; alcohol metabolic process; small molecule metabolic process; steroid metabolic process; organic cyclic compound metabolic process; single-organism process; organic substance transport; lipid localization; primary metabolic process; sterol metabolic process; lipoprotein metabolic process; establishment of localization; organic substance metabolic process; transport; metabolic process; single-organism localization; single-organism metabolic process; macromolecule metabolic process; protein metabolic process; localization; macromolecule localization; single-organism transport; lipid metabolic process; | macromolecular complex; extracellular region part; extracellular space; high-density lipoprotein particle; protein-lipid complex; extracellular region; plasma lipoprotein particle;                                                                            | lipid binding; binding;                                                                                                                                                                                                                                                                                                                                                                                                                              | K08757 | APOA1; apolipoprotein A-I                                                           | dre03320 PPAR signaling pathway - Danio rerio (zebrafish);                                                                                     |                                                                                                                                                     |
| Q6P5L2 | dbi   | Uncharacterized protein                  | ..AAEEVK(cr)QLK_       | 14   | 1 | OKAAEEVKQLKAKPT.....K.L..... | cytosol         |                                                                                                                                                                                                                                                                                                                                                                                                                                                                                                                                                                                                                                                                                                                           |                                                                                                                                                                                                                                                                 | fatty-acyl-CoA binding; binding; ion binding; anion binding; cofactor binding; sulfur compound binding; coenzyme binding;                                                                                                                                                                                                                                                                                                                            | K08762 | DBI; diazepam-binding inhibitor (GABA receptor modulator, acyl-CoA-binding protein) | dre03320 PPAR signaling pathway - Danio rerio (zebrafish);                                                                                     | IPR000582; IPR014352; Acyl-CoA-binding protein, ACBP; FERM/acyl-CoA-binding protein, 3-helical bundle;                                              |
| E9QGA9 | gapdh | Glyceraldehyde-3-phosphate dehydrogenase | ..AFLTK(cr)K_          | 24   | 1 | TRAAFLTKKVEIVAI.....K.V..... | cytosol         |                                                                                                                                                                                                                                                                                                                                                                                                                                                                                                                                                                                                                                                                                                                           |                                                                                                                                                                                                                                                                 | organic cyclic compound binding; heterocyclic compound binding; oxidoreductase activity, acting on the aldehyde or oxo group of donors, NAD or NADP as acceptor; nucleoside phosphate binding; catalytic activity; binding; oxidoreductase activity, acting on the aldehyde or oxo group of donors; nucleotide binding; small molecule binding; oxidoreductase activity; glyceraldehyde-3-phosphate dehydrogenase (NAD+) (phosphorylating) activity; |        |                                                                                     | IPR020829; IPR016040; IPR020828; Glyceraldehyde 3-phosphate dehydrogenase, NAD(P) binding domain;                                              | Glyceraldehyde 3-phosphate dehydrogenase, catalytic domain; NAD(P)-binding domain; Glyceraldehyde 3-phosphate dehydrogenase, NAD(P) binding domain; |
| B0UY61 | neb   | Uncharacterized protein                  | ..AAK(cr)EAYK          | 5231 | 1 | AHEIRAAKEAYKNIS..E...K.....  | nuclear         |                                                                                                                                                                                                                                                                                                                                                                                                                                                                                                                                                                                                                                                                                                                           |                                                                                                                                                                                                                                                                 |                                                                                                                                                                                                                                                                                                                                                                                                                                                      | K18267 |                                                                                     | IPR001452; SH3 domain;                                                                                                                         |                                                                                                                                                     |
| Q6PBZ1 | rp17a | Uncharacterized protein                  | ..AALAK(cr)LVEAK_      | 217  | 1 | EDKAALAKLVEAKT.....K.V.....  | plasma membrane | cellular component biogenesis; ribosome biogenesis; ribonucleoprotein complex biogenesis; cellular component organization or biogenesis;                                                                                                                                                                                                                                                                                                                                                                                                                                                                                                                                                                                  | ribosome; organelle; intracellular organelle; intracellular non-membrane-bounded organelle; cell part; intracellular; cytoplasm; macromolecular complex; intracellular part; cell; ribonucleoprotein complex; cytoplasmic part; non-membrane-bounded organelle; |                                                                                                                                                                                                                                                                                                                                                                                                                                                      | K02936 | RP-L7Ae; large subunit ribosomal protein L7Ae                                       | dre03010 Ribosome - Danio rerio (zebrafish);                                                                                                   | IPR029064; IPR0004038; 50S ribosomal protein L30e-like; Ribosomal protein L7Ae/L30e/S12e/Gadd45;                                                    |
| Q6XG62 | icn   | Protein S100                             | ..AALDK(cr)IFK_        | 58   | 1 | TDKAALDKIFKDLDA.....DK.....  | cytosol         |                                                                                                                                                                                                                                                                                                                                                                                                                                                                                                                                                                                                                                                                                                                           |                                                                                                                                                                                                                                                                 | cation binding; metal ion binding; calcium ion binding; binding; ion binding;                                                                                                                                                                                                                                                                                                                                                                        |        |                                                                                     | IPR011992; IPR002048; IPR015787; EF-hand domain pair; EF-hand domain; S100/CaBP-9k; type, calcium binding subdomain;                           |                                                                                                                                                     |
| Q6PB15 | pps25 | 40S ribosomal protein S25                | ..AALQELGK(cr)GLIK_    | 93   | 1 | ALQELGKGLIKLVS.....K.L.....  | nuclear         | ribosome; organelle; intracellular organelle; intracellular non-membrane-bounded organelle; cell part; intracellular; cytoplasm; macromolecular complex; intracellular part; cell; ribonucleoprotein complex; cytoplasmic part; non-membrane-bounded organelle;                                                                                                                                                                                                                                                                                                                                                                                                                                                           |                                                                                                                                                                                                                                                                 |                                                                                                                                                                                                                                                                                                                                                                                                                                                      | K02975 | RP-S25e; small subunit ribosomal protein S25e                                       | dre03010 Ribosome - Danio rerio (zebrafish);                                                                                                   |                                                                                                                                                     |
| A5WWJ4 | matn1 | Uncharacterized protein                  | ..AALVK(cr)AVSK_       | 103  | 1 | KTKAALVKAVSKIEP.....K.V..... | extracellular   |                                                                                                                                                                                                                                                                                                                                                                                                                                                                                                                                                                                                                                                                                                                           |                                                                                                                                                                                                                                                                 | cation binding; metal ion binding; calcium ion binding; binding; ion binding;                                                                                                                                                                                                                                                                                                                                                                        |        |                                                                                     | IPR019466; IPR000742; IPR002035; Matrin, coiled-coil trimerisation domain; Epidermal growth factor-like domain; von Willebrand factor, type A; |                                                                                                                                                     |
| F1RS45 | krt5  | Uncharacterized protein                  | ..AAVENFVLLK(cr)K_     | 263  | 1 | ENEFVLLKVDVDAAY..E...K.....  | nuclear         | intracellular organelle; intracellular non-membrane-bounded organelle; cytoskeletal part; intracellular organelle part; macromolecular complex; intracellular part; cell; keratin filament; organelle part; non-membrane-bounded organelle; organelle; cytoskeleton; intermediate filament; cytoskeleton; cell part; intracellular; intermediate filament; protein complex;                                                                                                                                                                                                                                                                                                                                               |                                                                                                                                                                                                                                                                 | structural molecule activity;                                                                                                                                                                                                                                                                                                                                                                                                                        | K07605 |                                                                                     |                                                                                                                                                |                                                                                                                                                     |

|        |          |                                                                    |                                 |      |   |                  |               |              |                                                                                                                                                                                                                                                                                                                                                                                                                                                                                                                                                                                                                                                                                                                                                                                                                                                                                                                                                                                                                                                                                                                                                                                                                      |                                                                                                                                                                                                                                                                                                                                                                                                                                                                                                                                                                                                                                                                                                                                                                                                                                                                             |                                                                                                                                                                                                                                                                                                                                                                                                                    |                         |                                                     |                                                                                                                                                                                                           |  |
|--------|----------|--------------------------------------------------------------------|---------------------------------|------|---|------------------|---------------|--------------|----------------------------------------------------------------------------------------------------------------------------------------------------------------------------------------------------------------------------------------------------------------------------------------------------------------------------------------------------------------------------------------------------------------------------------------------------------------------------------------------------------------------------------------------------------------------------------------------------------------------------------------------------------------------------------------------------------------------------------------------------------------------------------------------------------------------------------------------------------------------------------------------------------------------------------------------------------------------------------------------------------------------------------------------------------------------------------------------------------------------------------------------------------------------------------------------------------------------|-----------------------------------------------------------------------------------------------------------------------------------------------------------------------------------------------------------------------------------------------------------------------------------------------------------------------------------------------------------------------------------------------------------------------------------------------------------------------------------------------------------------------------------------------------------------------------------------------------------------------------------------------------------------------------------------------------------------------------------------------------------------------------------------------------------------------------------------------------------------------------|--------------------------------------------------------------------------------------------------------------------------------------------------------------------------------------------------------------------------------------------------------------------------------------------------------------------------------------------------------------------------------------------------------------------|-------------------------|-----------------------------------------------------|-----------------------------------------------------------------------------------------------------------------------------------------------------------------------------------------------------------|--|
| Q6PC77 | atp5h    | ATP synthase, H+ transporting, mitochondrial F0 complex, subunit d | _AAVK(cr)AIDWLAFER_             | 9    | 1 | AGRRAAVKADWLAF   | .....K.L..... | cytosol      | nucleoside metabolic process; purine nucleoside metabolic process; purine ribonucleoside monophosphate metabolic process; nucleotide metabolic process; single-organism process; purine ribonucleoside biosynthetic process; nucleoside biosynthetic process; biosynthetic process; ribonucleoside monophosphate biosynthetic process; cellular metabolic process; phosphate-containing compound metabolic process; establishment of localization; ribose phosphate biosynthetic process; metabolic process; carbohydrate derivative biosynthetic process; nucleoside phosphate metabolic process; ribose phosphate metabolic process; purine nucleoside triphosphate biosynthetic process; single-organism transport; heterocycle biosynthetic process; cation transmembrane transport; purine ribonucleoside triphosphate biosynthetic process; small molecule metabolic process; ATP biosynthetic process; single-organism cellular process; purine ribonucleoside triphosphate metabolic process; organic cyclic compound metabolic process; purine-containing compound metabolic process; energy coupled proton transport, down electrochemical gradient; ribonucleoside triphosphate metabolic process; purine | intracellular organelle, membrane; mitochondrial part; organelle membrane; organelle envelope; intracellular organelle part; cytoplasm; macromolecular complex; intracellular part; mitochondrial proton-transporting ATP synthase complex, coupling factor F(o); cell; mitochondrial membrane part; proton-transporting ATP synthase complex; mitochondrion; organelle part; intracellular membrane-bounded organelle; organelle; mitochondrial envelope; mitochondrial proton-transporting ATP synthase complex; membrane part; cell part; intracellular; proton-transporting two-sector ATPase complex; envelope; organelle inner membrane; proton-transporting ATP synthase complex, coupling factor F(o); organelle; mitochondrial inner membrane; proton-transporting two-sector ATPase complex, proton-transporting domain; mitochondrial membrane; cytoplasmic part | ion transmembrane transporter activity; substrate-specific transporter activity; monovalent inorganic cation transmembrane transporter activity; inorganic cation transmembrane transporter activity; hydrogen ion transmembrane transporter activity; cation transmembrane transporter activity; substrate-specific transmembrane transporter activity; transporter activity; transmembrane transporter activity; | K02138                  | ATPase F0; F-type H+ transportin g ATPase subunit d | dre01100 Metabolic pathways - Danio rerio (zebrafish); dre00190 Oxidative phosphorylation - Danio rerio (zebrafish);                                                                                      |  |
| Q7ZT21 | hbae1    | Embryonic alpha globin e1                                          | _AAVK(cr)TLWAK_                 | 12   | 1 | AKDKAAVKTLWAKIA  | .....K.L..... | cytosol      | cell part; intracellular; hemoglobin complex; cytoplasm; macromolecular complex; intracellular part; cytosolic part; protein complex; cell; cytosol; cytoplasmic part;                                                                                                                                                                                                                                                                                                                                                                                                                                                                                                                                                                                                                                                                                                                                                                                                                                                                                                                                                                                                                                               | organic cyclic compound binding; heterocyclic compound binding; heme binding; iron ion binding; transition metal ion binding; oxygen binding; binding; ion binding; substrate-specific transporter activity; cation binding; oxygen transporter activity; tetrapyrrole binding; transporter activity;                                                                                                                                                                                                                                                                                                                                                                                                                                                                                                                                                                       | K13826                                                                                                                                                                                                                                                                                                                                                                                                             |                         | IPR009050; IPR009971; IPR012292;                    | Globin-like; Globin; Globin; structural domain;                                                                                                                                                           |  |
| Q6P0G6 | myf1     | Uncharacterized protein                                            | _ADAVDLGVK(cr)LDFTQDQM(ox)EDYR_ | 40   | 1 | AVDLGVKLDFTQDQ   |               | cytosol      |                                                                                                                                                                                                                                                                                                                                                                                                                                                                                                                                                                                                                                                                                                                                                                                                                                                                                                                                                                                                                                                                                                                                                                                                                      | cation binding; metal ion binding; calcium ion binding; binding; ion binding;                                                                                                                                                                                                                                                                                                                                                                                                                                                                                                                                                                                                                                                                                                                                                                                               | K05738                                                                                                                                                                                                                                                                                                                                                                                                             |                         | IPR002048; IPR011992;                               | EF-hand domain; EF-hand domain pair;                                                                                                                                                                      |  |
| Q6P0G6 | myf1     | Uncharacterized protein                                            | _ADAVDLGVK(cr)LDFTQDQMEDYR_     | 40   | 1 | AVDLGVKLDFTQDQ   |               | cytosol      |                                                                                                                                                                                                                                                                                                                                                                                                                                                                                                                                                                                                                                                                                                                                                                                                                                                                                                                                                                                                                                                                                                                                                                                                                      | cation binding; metal ion binding; calcium ion binding; binding; ion binding;                                                                                                                                                                                                                                                                                                                                                                                                                                                                                                                                                                                                                                                                                                                                                                                               | K05738                                                                                                                                                                                                                                                                                                                                                                                                             |                         | IPR002048; IPR011992;                               | EF-hand domain; EF-hand domain pair;                                                                                                                                                                      |  |
| B8A568 | myhz1.1  | Uncharacterized protein                                            | _ADIAESQVNVK(cr)LR_             | 1921 | 1 | IAESQVNVKLRKRSR  | ..E...K.....  | nuclear      | intracellular organelle; intracellular non-membrane-bounded organelle; cytoskeleton part; intracellular organelle part; macromolecular complex; intracellular part; cell; actin cytoskeleton; organelle part; non-membrane-bounded organelle; organelle; cytoskeleton; cell part; intracellular; myosin complex; protein complex;                                                                                                                                                                                                                                                                                                                                                                                                                                                                                                                                                                                                                                                                                                                                                                                                                                                                                    | ATP binding; motor activity; nucleoside phosphate binding; nucleoside binding; ion binding; hydrolase activity, acting on acid anhydrides; hydrolase activity; nucleotide binding; nucleoside-triphosphatase activity; organic cyclic compound binding; heterocyclic compound binding; ribonucleoside binding; carbohydrate derivative binding; pyrophosphatase activity; catalytic activity; ribonucleotide binding; purine ribonucleoside binding; anion binding; purine ribonucleotide binding; adenylyl ribonucleotide binding; adenylyl nucleotide binding; purine nucleoside binding; hydrolase activity, acting on acid anhydrides, in phosphorus-containing anhydrides; purine nucleotide binding; small molecule binding; purine ribonucleoside triphosphate binding;                                                                                              | K10352                                                                                                                                                                                                                                                                                                                                                                                                             | MYH; myosin heavy chain | dre04630 Tight junction - Danio rerio (zebrafish);  | Myosin tail; Myosin, N-terminal, SH3-like; Myosin head, motor domain; P-loop containing nucleoside triphosphate hydrolase; Myosin-like IQ motif-containing domain;                                        |  |
| B8A561 | myhz1.2  | Uncharacterized protein                                            | _ADIAESQVNVK(cr)LR_             | 1921 | 1 | IAESQVNVKLRKRSR  | ..E...K.....  | nuclear      | intracellular organelle; intracellular non-membrane-bounded organelle; cytoskeleton part; intracellular organelle part; macromolecular complex; intracellular part; cell; actin cytoskeleton; organelle part; non-membrane-bounded organelle; organelle; cytoskeleton; cell part; intracellular; myosin complex; protein complex;                                                                                                                                                                                                                                                                                                                                                                                                                                                                                                                                                                                                                                                                                                                                                                                                                                                                                    | ATP binding; motor activity; nucleoside phosphate binding; nucleoside binding; ion binding; hydrolase activity, acting on acid anhydrides; hydrolase activity; nucleotide binding; nucleoside-triphosphatase activity; organic cyclic compound binding; heterocyclic compound binding; ribonucleoside binding; carbohydrate derivative binding; pyrophosphatase activity; catalytic activity; ribonucleotide binding; purine ribonucleoside binding; anion binding; purine ribonucleotide binding; adenylyl ribonucleotide binding; adenylyl nucleotide binding; purine nucleoside binding; hydrolase activity, acting on acid anhydrides, in phosphorus-containing anhydrides; purine nucleotide binding; small molecule binding; purine ribonucleoside triphosphate binding;                                                                                              | K10352                                                                                                                                                                                                                                                                                                                                                                                                             | MYH; myosin heavy chain | dre04630 Tight junction - Danio rerio (zebrafish);  | Myosin tail; Myosin, N-terminal, SH3-like; Myosin head, motor domain; P-loop containing nucleoside triphosphate hydrolase; Myosin-like IQ motif-containing domain;                                        |  |
| Q0D2W2 | tnni2a.4 | Fast muscle troponin I                                             | ADK(cr)EIEDLK                   | 87   | 1 | AKVAKADKIEIDLKI  | .....DK.....  | mitochondria |                                                                                                                                                                                                                                                                                                                                                                                                                                                                                                                                                                                                                                                                                                                                                                                                                                                                                                                                                                                                                                                                                                                                                                                                                      |                                                                                                                                                                                                                                                                                                                                                                                                                                                                                                                                                                                                                                                                                                                                                                                                                                                                             |                                                                                                                                                                                                                                                                                                                                                                                                                    |                         |                                                     |                                                                                                                                                                                                           |  |
| Q0D2W2 | tnni2a.4 | Fast muscle troponin I                                             | ADKEIEDLK(cr)IK                 | 93   | 1 | DKEIEDLKIKVDLKI  | ..E...K.....  | mitochondria |                                                                                                                                                                                                                                                                                                                                                                                                                                                                                                                                                                                                                                                                                                                                                                                                                                                                                                                                                                                                                                                                                                                                                                                                                      |                                                                                                                                                                                                                                                                                                                                                                                                                                                                                                                                                                                                                                                                                                                                                                                                                                                                             |                                                                                                                                                                                                                                                                                                                                                                                                                    |                         |                                                     |                                                                                                                                                                                                           |  |
| F1QZU7 | aldh2.2  | Uncharacterized protein (Fragment)                                 | _ADVDK(cr)AVK_                  | 77   | 1 | GDKADVDKAVKKAARD | .....DK.....  | cytosol      |                                                                                                                                                                                                                                                                                                                                                                                                                                                                                                                                                                                                                                                                                                                                                                                                                                                                                                                                                                                                                                                                                                                                                                                                                      | oxidoreductase activity, acting on the aldehyde or oxo group of donors, NAD or NADP as acceptor; catalytic activity; oxidoreductase activity; oxidoreductase activity, acting on the aldehyde or oxo group of donors;                                                                                                                                                                                                                                                                                                                                                                                                                                                                                                                                                                                                                                                       |                                                                                                                                                                                                                                                                                                                                                                                                                    |                         |                                                     | Aldehyde dehydrogenase I dehydrogenase; Aldehyde IPR016161; dehydrogenase domain; Aldehyde IPR015590; dehydrogenase, IPR016162; dehydrogenase, IPR016163; N-terminal; Aldehyde dehydrogenase, C-terminal; |  |

|        |           |                                     |                       |      |   |                                     |         |                                                                                                                                                                                                                                                                                                                                                                                                                                                                                                                                                                                                                                                                                                                                                                                                                                                                                                                                                                                                                                                                                                                                                                                                                                                            |                                                                                                                                                                                                                                                                                                                                                                                                                                                                                                                                                                                                                                                                                                                                                                                                                                                                                                                                                                                                                                                                                                                                                                                                                                                                                                                                                                             |                                                                                                                                                                                                                                                                                                                                                                                                                                                                                                                                                                                                                                                                                                                                                                                                        |                                                  |                                                                                                                                                                                                                                     |                                                                                                              |                                                                                                                                                                    |                                                      |
|--------|-----------|-------------------------------------|-----------------------|------|---|-------------------------------------|---------|------------------------------------------------------------------------------------------------------------------------------------------------------------------------------------------------------------------------------------------------------------------------------------------------------------------------------------------------------------------------------------------------------------------------------------------------------------------------------------------------------------------------------------------------------------------------------------------------------------------------------------------------------------------------------------------------------------------------------------------------------------------------------------------------------------------------------------------------------------------------------------------------------------------------------------------------------------------------------------------------------------------------------------------------------------------------------------------------------------------------------------------------------------------------------------------------------------------------------------------------------------|-----------------------------------------------------------------------------------------------------------------------------------------------------------------------------------------------------------------------------------------------------------------------------------------------------------------------------------------------------------------------------------------------------------------------------------------------------------------------------------------------------------------------------------------------------------------------------------------------------------------------------------------------------------------------------------------------------------------------------------------------------------------------------------------------------------------------------------------------------------------------------------------------------------------------------------------------------------------------------------------------------------------------------------------------------------------------------------------------------------------------------------------------------------------------------------------------------------------------------------------------------------------------------------------------------------------------------------------------------------------------------|--------------------------------------------------------------------------------------------------------------------------------------------------------------------------------------------------------------------------------------------------------------------------------------------------------------------------------------------------------------------------------------------------------------------------------------------------------------------------------------------------------------------------------------------------------------------------------------------------------------------------------------------------------------------------------------------------------------------------------------------------------------------------------------------------------|--------------------------------------------------|-------------------------------------------------------------------------------------------------------------------------------------------------------------------------------------------------------------------------------------|--------------------------------------------------------------------------------------------------------------|--------------------------------------------------------------------------------------------------------------------------------------------------------------------|------------------------------------------------------|
| Q68EH2 | ak1       | Adenylyate kinase isoenzyme 1       | _ADVSK(cr)GYLDGYPR_   | 88   | 1 | IAKADVSKGYLDGY                      | cytosol | nucleoside metabolic process; purine nucleoside metabolic process; cellular aromatic compound metabolic process; purine ribonucleoside monophosphate metabolic process; ribonucleotide metabolic process; nucleotide metabolic process; single-organism process; cellular metabolic process; phosphate-containing compound metabolic process; organic substance metabolic process; metabolic process; heterocycle metabolic process; nucleobase-containing compound metabolic process; nucleoside phosphate metabolic process; carbohydrate derivative metabolic process; ribose phosphate metabolic process; cellular nitrogen compound metabolic process; nucleobase-containing small molecule metabolic process; purine nucleoside triphosphate metabolic process; cellular process; ribonucleoside metabolic process; ATP metabolic process; small molecule metabolic process; single-organism cellular process; purine ribonucleoside triphosphate metabolic process; nitrogen compound metabolic process; organic cyclic compound metabolic process; purine-containing compound metabolic process; nucleoside triphosphate metabolic process; primary metabolic process; ribonucleoside triphosphate metabolic process; nucleoside metabolic process | intracellular part; cell; cell part; intracellular cytoplasm;                                                                                                                                                                                                                                                                                                                                                                                                                                                                                                                                                                                                                                                                                                                                                                                                                                                                                                                                                                                                                                                                                                                                                                                                                                                                                                               | ATP binding; nucleoside phosphate binding; adenylyate kinase activity; nucleoside binding; ion binding; nucleobase-containing compound kinase activity; nucleotide kinase activity; phosphotransferase activity; phosphate group as acceptor; organic cyclic compound binding; heterocyclic compound binding; ribonucleoside binding; carbohydrate derivative binding; kinase activity; ribonucleotide binding; catalytic activity; binding; purine ribonucleoside binding; purine ribonucleotide binding; anion binding; adenyly ribonucleotide binding; adenyly nucleoside binding; purine nucleoside binding; transferase activity; purine nucleotide binding; small molecule binding; purine ribonucleoside triphosphate binding; transferase activity; transferring phosphorus-containing groups; | K00939                                           | adk; adenylyate kinase [EC:2.7.4.3]                                                                                                                                                                                                 | dre01100 Metabolic pathways - Danio rerio (zebrafish); dre00230 Purine metabolism - Danio rerio (zebrafish); | IPR027417;                                                                                                                                                         | P-loop containing nucleoside triphosphate hydrolase; |
| Q6PC53 | ppiib     | Peptidyl-prolyl cis-trans isomerase | _ADVVPK(cr)TAENFR_    | 31   | 1 | LRADVVPKTAENFR                      | cytosol | cellular protein metabolic process; protein peptidyl-prolyl isomerization; peptidyl-proline modification; primary metabolic process; cellular metabolic process; organic substance metabolic process; protein folding; peptidyl-amino acid modification; metabolic process; cellular macromolecule metabolic process; cellular protein modification process; protein folding; metabolic process; macromolecule metabolic process; macromolecule modification; protein modification process; cellular process;                                                                                                                                                                                                                                                                                                                                                                                                                                                                                                                                                                                                                                                                                                                                              | peptidyl-prolyl cis-trans isomerase activity; isomerase activity; catalytic activity; cis-trans isomerase activity;                                                                                                                                                                                                                                                                                                                                                                                                                                                                                                                                                                                                                                                                                                                                                                                                                                                                                                                                                                                                                                                                                                                                                                                                                                                         | K03767                                                                                                                                                                                                                                                                                                                                                                                                                                                                                                                                                                                                                                                                                                                                                                                                 |                                                  | IPR0202130; IPR029000;                                                                                                                                                                                                              | Cyclophilin-type peptidyl-prolyl cis-trans isomerase domain; Cyclophilin-like domain;                        |                                                                                                                                                                    |                                                      |
| E7EZ16 |           | Uncharacterized protein             | _AEDKNDK(cr)AVK_      | 633  | 1 | AEDKNDKAVKOLVI .....K.E.....        | cytosol | protein folding; metabolic process; response to stress; cellular protein metabolic process; cellular macromolecule metabolic process; macromolecule metabolic process; protein metabolic process; response to stimulus; primary metabolic process; cellular process; cellular metabolic process; organic substance metabolic process;                                                                                                                                                                                                                                                                                                                                                                                                                                                                                                                                                                                                                                                                                                                                                                                                                                                                                                                      | ATP binding; nucleoside phosphate binding; nucleoside binding; ion binding; nucleotide binding; organic cyclic compound binding; heterocyclic compound binding; ribonucleoside binding; carbohydrate derivative binding; ribonucleotide binding; binding; purine ribonucleoside binding; anion binding; purine ribonucleotide binding; adenyly ribonucleotide binding; adenyly nucleoside binding; purine nucleoside binding; purine nucleotide binding; small molecule binding; purine ribonucleoside triphosphate binding;                                                                                                                                                                                                                                                                                                                                                                                                                                                                                                                                                                                                                                                                                                                                                                                                                                                | K04079                                                                                                                                                                                                                                                                                                                                                                                                                                                                                                                                                                                                                                                                                                                                                                                                 | htpG; molecular chaperone htpG                   | dre04914 Progesterone-mediated oocyte maturation - Danio rerio (zebrafish); dre04141 Protein processing in endoplasmic reticulum - Danio rerio (zebrafish); dre04621 NOD-like receptor signaling pathway - Danio rerio (zebrafish); | IPR020568; IPR020575; IPR003594;                                                                             | Ribosomal protein S5 domain 2-type fold; Heat shock protein Hsp90, N-terminal; Histidine kinase-like ATPase, C-terminal domain;                                    |                                                      |
| F1QK60 | krt4      | Uncharacterized protein             | _AAEASWYK(cr)QK_      | 306  | 1 | AAEASWYKQKFEEMQ                     | nuclear | intracellular organelle; intracellular non-membrane-bounded organelle; cytoskeletal part; intracellular organelle part; macromolecular complex; intracellular part; cell; keratin filament; organelle part; non-membrane-bounded organelle; organelle; cytoskeleton; intermediate filament cytoskeleton; cell part; intracellular; intermediate filament; protein complex;                                                                                                                                                                                                                                                                                                                                                                                                                                                                                                                                                                                                                                                                                                                                                                                                                                                                                 | structural molecule activity;                                                                                                                                                                                                                                                                                                                                                                                                                                                                                                                                                                                                                                                                                                                                                                                                                                                                                                                                                                                                                                                                                                                                                                                                                                                                                                                                               | K07605                                                                                                                                                                                                                                                                                                                                                                                                                                                                                                                                                                                                                                                                                                                                                                                                 |                                                  |                                                                                                                                                                                                                                     |                                                                                                              |                                                                                                                                                                    |                                                      |
| Q6NWK4 | atp6v1e1b | Atp6v1e1 protein                    | _AEEFNIEK(cr)GR_      | 42   | 1 | EEEFNIEKGRLVQTO .....E.....K.E..... | cytosol | ion transmembrane transport; cation transmembrane transport; inorganic ion transmembrane transport; single-organism cellular process; energy coupled proton transmembrane transport; against electrochemical gradient; single-organism process; hydrogen transport; proton transport; establishment of localization; transport; transmembrane transport; single-organism localization; cation transport; ion transport; ATP hydrolysis coupled proton transport; hydrogen ion transmembrane transport; localization; cellular process; monovalent inorganic cation transport; inorganic cation transmembrane transport; single-organism transport;                                                                                                                                                                                                                                                                                                                                                                                                                                                                                                                                                                                                         | active transmembrane transporter activity; ATPase activity, coupled to transmembrane movement of ions; ion transmembrane transporter activity; primary active transmembrane transporter activity; ATPase activity, coupled to transmembrane movement of ions, rotational mechanism; hydrolase activity, acting on acid anhydrides; substrate-specific transporter activity; monovalent inorganic cation transmembrane transporter activity; hydrolase activity; nucleoside-triphosphatase activity; hydrogen ion transmembrane transporter activity; substrate-specific transmembrane transporter activity; proton-transporting ATPase activity, rotational mechanism; ATPase activity; P-P-bond-hydrolysis-driven transmembrane transporter activity; pyrophosphatase activity; cation-transporting ATPase activity; ATPase activity, coupled to transmembrane movement of substances; catalytic activity; ATPase activity, coupled to movement of substances; ATPase activity, coupled; hydrogen-exporting ATPase activity; hydrolase activity, acting on acid anhydrides, catalyzing transmembrane movement of substances; inorganic cation transmembrane transporter activity; hydrolase activity, acting on acid anhydrides, in phosphorus-containing anhydrides; cation transmembrane transporter activity; transporter activity; transmembrane transporter activity; | K02150                                                                                                                                                                                                                                                                                                                                                                                                                                                                                                                                                                                                                                                                                                                                                                                                 | ATP6V1E; V-type H+-transporting ATPase subunit E | dre01100 Metabolic pathways - Danio rerio (zebrafish); dre04145 Phagosome - Danio rerio (zebrafish); dre00190 Oxidative phosphorylation - Danio rerio (zebrafish);                                                                  |                                                                                                              |                                                                                                                                                                    |                                                      |
| Q804G7 | anxa4     | Annexin                             | _AIDMLDK(cr)AEFLK_    | 286  | 1 | EIDMLDKAEFLKMY .....K.E.....        | cytosol | calcium-dependent phospholipid binding; binding; phospholipid binding; ion binding; lipid binding; metal ion binding; cation binding; anion binding; calcium ion binding;                                                                                                                                                                                                                                                                                                                                                                                                                                                                                                                                                                                                                                                                                                                                                                                                                                                                                                                                                                                                                                                                                  |                                                                                                                                                                                                                                                                                                                                                                                                                                                                                                                                                                                                                                                                                                                                                                                                                                                                                                                                                                                                                                                                                                                                                                                                                                                                                                                                                                             | K17093                                                                                                                                                                                                                                                                                                                                                                                                                                                                                                                                                                                                                                                                                                                                                                                                 |                                                  |                                                                                                                                                                                                                                     |                                                                                                              |                                                                                                                                                                    |                                                      |
| F1QJK4 | myh9b     | Uncharacterized protein             | _AEMEDLVSSK(cr)DDVGK_ | 1512 | 1 | MEDLVSSKDDVGKSV                     | nuclear | intracellular organelle; intracellular non-membrane-bounded organelle; cytoskeletal part; intracellular organelle part; macromolecular complex; intracellular part; cell; actin cytoskeleton; organelle part; non-membrane-bounded organelle; organelle; cytoskeleton; cell part; intracellular; myosin complex; protein complex;                                                                                                                                                                                                                                                                                                                                                                                                                                                                                                                                                                                                                                                                                                                                                                                                                                                                                                                          | ATP binding; motor activity; nucleoside phosphate binding; nucleoside binding; ion binding; hydrolase activity, acting on acid anhydrides; hydrolase activity; nucleotide binding; nucleoside-triphosphatase activity; organic cyclic compound binding; heterocyclic compound binding; ribonucleoside binding; carbohydrate derivative binding; pyrophosphatase activity; catalytic activity; ribonucleotide binding; binding; purine ribonucleoside binding; anion binding; purine ribonucleotide binding; adenyly ribonucleotide binding; adenyly nucleoside binding; purine nucleoside binding; hydrolase activity, acting on acid anhydrides, in phosphorus-containing anhydrides; purine nucleotide binding; small molecule binding; purine ribonucleoside triphosphate binding;                                                                                                                                                                                                                                                                                                                                                                                                                                                                                                                                                                                       | K10352                                                                                                                                                                                                                                                                                                                                                                                                                                                                                                                                                                                                                                                                                                                                                                                                 | MYH; myosin heavy chain                          | dre04530 Tight junction - Danio rerio (zebrafish);                                                                                                                                                                                  | IPR002328; IPR004009; IPR027417; IPR001609; IPR027401;                                                       | Myosin tail; Myosin, N-terminal, SH3-like; P-loop containing nucleoside triphosphate hydrolase; Myosin head, motor domain; Myosin-like IQ motif-containing domain; |                                                      |

|        |         |                                                                                          |                              |      |   |                 |               |               |                                                                                                                                                                                                                                                                                                                                                                                                                                                                                                                                                                                                                                                                                                                           |                                                                                                                                                                                                                                                                                                                                                                                                                                                                                                                                                                                                                                                                                                                                                                                         |                                          |                                                                                                                              |                                                            |                                                        |                                                                                                                                                                    |
|--------|---------|------------------------------------------------------------------------------------------|------------------------------|------|---|-----------------|---------------|---------------|---------------------------------------------------------------------------------------------------------------------------------------------------------------------------------------------------------------------------------------------------------------------------------------------------------------------------------------------------------------------------------------------------------------------------------------------------------------------------------------------------------------------------------------------------------------------------------------------------------------------------------------------------------------------------------------------------------------------------|-----------------------------------------------------------------------------------------------------------------------------------------------------------------------------------------------------------------------------------------------------------------------------------------------------------------------------------------------------------------------------------------------------------------------------------------------------------------------------------------------------------------------------------------------------------------------------------------------------------------------------------------------------------------------------------------------------------------------------------------------------------------------------------------|------------------------------------------|------------------------------------------------------------------------------------------------------------------------------|------------------------------------------------------------|--------------------------------------------------------|--------------------------------------------------------------------------------------------------------------------------------------------------------------------|
| P13104 | tpma    | Tropomyosin alpha-1 chain                                                                | _AEQAETDK(cr)K_              | 29   | 1 | AEQAETDKKAAEERS | .....DK.....  | cytosol       | cytoskeleton; organelle; intracellular organelle; intracellular non-membrane-bounded organelle; cell part; intracellular; cytoplasm; intracellular part; cell; non-membrane-bounded organelle;                                                                                                                                                                                                                                                                                                                                                                                                                                                                                                                            | K10373                                                                                                                                                                                                                                                                                                                                                                                                                                                                                                                                                                                                                                                                                                                                                                                  | TPM1; tropomyosin 1                      | dre04260 Carabax muscle contraction - Danio rerio (zebrafish); dre04261 Adrenergic signaling in cardiomyocytes - Danio rerio |                                                            |                                                        |                                                                                                                                                                    |
| Q8IQD7 | tpm2    | Uncharacterized protein                                                                  | _AEVAEAK(cr)SGDLEELK_        | 189  | 1 | RAEVAEAKSGDLEEE | ..E...K.....  | cytosol       |                                                                                                                                                                                                                                                                                                                                                                                                                                                                                                                                                                                                                                                                                                                           | K10374                                                                                                                                                                                                                                                                                                                                                                                                                                                                                                                                                                                                                                                                                                                                                                                  | TPM2; tropomyosin 2                      | dre04260 Carabax muscle contraction - Danio rerio (zebrafish); dre04261 Adrenergic signaling in cardiomyocytes - Danio rerio |                                                            |                                                        |                                                                                                                                                                    |
| Q6IMW7 | pvalb4  | Parvalbumin 4                                                                            | _FAIDQDK(cr)SGFIEEELK_       | 55   | 1 | FAIDQDKSGFIEEE  | .....DK.....  | cytosol       | cation binding; metal ion binding; calcium ion binding; binding; ion binding;                                                                                                                                                                                                                                                                                                                                                                                                                                                                                                                                                                                                                                             |                                                                                                                                                                                                                                                                                                                                                                                                                                                                                                                                                                                                                                                                                                                                                                                         |                                          |                                                                                                                              | IPR011992; IPR002048;                                      | EF-hand domain pair; EF-hand domain;                   |                                                                                                                                                                    |
| Q8Q3M8 | ywha9b  | Tyrosine 3-monooxygenase/tryptophan 5-monooxygenase activation protein, zeta polypeptide | _AFDISK(cr)TEMQPHIR_         | 157  | 1 | QKAFDISKTEMQPTH | .....K.E..... | cytosol       | monooxygenase activity; catalytic activity; oxidoreductase activity;                                                                                                                                                                                                                                                                                                                                                                                                                                                                                                                                                                                                                                                      | K16197                                                                                                                                                                                                                                                                                                                                                                                                                                                                                                                                                                                                                                                                                                                                                                                  | YWHA9_Q_Z_14-3-3 protein beta/theta/zeta | dre04110 Cell cycle - Danio rerio (zebrafish); dre04114 Oocyte meiosis - Danio rerio (zebrafish);                            | IPR023410;                                                 | 14-3-3 domain;                                         |                                                                                                                                                                    |
| Q42363 | apoa1   | Apolipoprotein A-I                                                                       | _AFESNIETK(cr)SK_            | 180  | 1 | ESNIETKSKVPMV   |               | extracellular | cholesterol metabolic process; lipid transport; organic hydroxy compound metabolic process; alcohol metabolic process; small molecule metabolic process; steroid metabolic process; organic cyclic compound metabolic process; single-organism process; organic substance transport; lipid localization; primary metabolic process; sterol metabolic process; lipoprotein metabolic process; establishment of localization; organic substance metabolic process; transport; metabolic process; single-organism localization; single-organism metabolic process; macromolecule metabolic process; protein metabolic process; localization; macromolecule localization; single-organism transport; lipid metabolic process; | macromolecular complex; extracellular region part; extracellular space; high-density lipoprotein particle; protein-lipid complex; extracellular region; plasma lipoprotein particle;                                                                                                                                                                                                                                                                                                                                                                                                                                                                                                                                                                                                    | K08757                                   | APOA1; apolipoprotein A-I                                                                                                    | dre03320 PPAR signaling pathway - Danio rerio (zebrafish); |                                                        |                                                                                                                                                                    |
| F1Q6J4 | hbab3   | Uncharacterized protein                                                                  | _AFFDK(cr)VAPK_              | 17   | 1 | NVKAFFDKVAPKAE  | .....DK.....  | cytosol       | cell part; intracellular; hemoglobin complex; cytoplasm; macromolecular complex; intracellular part; cytosolic part; protein complex; cell; cytosol; cytoplasmic part;                                                                                                                                                                                                                                                                                                                                                                                                                                                                                                                                                    | organic cyclic compound binding; heterocyclic compound binding; heme binding; iron ion binding; transition metal ion binding; oxygen binding; binding; ion binding; substrate-specific transporter activity; metal ion binding; cation binding; oxygen transporter activity; tetrapyrrole binding; transporter activity;                                                                                                                                                                                                                                                                                                                                                                                                                                                                |                                          |                                                                                                                              | IPR009050; IPR009071; IPR012292;                           | Globin-like; Globin; Globin; structural domain;        |                                                                                                                                                                    |
| Q98V0  | pvalb2  | Parvalbumin-2                                                                            | _AFFVIDQDK(cr)SGFIEDELK_     | 55   | 1 | FFVIDQDKSGFIEED | .....DK.....  | cytosol       |                                                                                                                                                                                                                                                                                                                                                                                                                                                                                                                                                                                                                                                                                                                           | cation binding; metal ion binding; calcium ion binding; binding; ion binding;                                                                                                                                                                                                                                                                                                                                                                                                                                                                                                                                                                                                                                                                                                           |                                          |                                                                                                                              | IPR002048; IPR011992;                                      | EF-hand domain; EF-hand domain pair;                   |                                                                                                                                                                    |
| Q804W0 | pvalb1  | Parvalbumin 1                                                                            | _AFLSAGSDGDK(cr)GAEFAALVK_   | 97   | 1 | GDSGDGDKGAEFFA  |               | cytosol       |                                                                                                                                                                                                                                                                                                                                                                                                                                                                                                                                                                                                                                                                                                                           | cation binding; metal ion binding; calcium ion binding; binding; ion binding;                                                                                                                                                                                                                                                                                                                                                                                                                                                                                                                                                                                                                                                                                                           |                                          |                                                                                                                              | IPR011992; IPR002048;                                      | EF-hand domain pair; EF-hand domain;                   |                                                                                                                                                                    |
| Q98V0  | pvalb2  | Parvalbumin-2                                                                            | _AFLSAGSDGDK(cr)IGVDEFALLVK_ | 97   | 1 | GDSGDGDKIGVDEFA |               | cytosol       |                                                                                                                                                                                                                                                                                                                                                                                                                                                                                                                                                                                                                                                                                                                           | cation binding; metal ion binding; calcium ion binding; binding; ion binding;                                                                                                                                                                                                                                                                                                                                                                                                                                                                                                                                                                                                                                                                                                           |                                          |                                                                                                                              | IPR002048; IPR011992;                                      | EF-hand domain; EF-hand domain pair;                   |                                                                                                                                                                    |
| E7F3J2 | hnmpua  | Uncharacterized protein                                                                  | _AFTYSK(cr)DELK_             | 345  | 1 | GKAFTYSKDELKGP  | .....K.E..... | nuclear       | organelle; intracellular membrane-bounded organelle; intracellular organelle; nucleus; cell part; intracellular; intracellular part; membrane-bounded organelle; cell;                                                                                                                                                                                                                                                                                                                                                                                                                                                                                                                                                    | organic cyclic compound binding; heterocyclic compound binding; binding; nucleic acid binding;                                                                                                                                                                                                                                                                                                                                                                                                                                                                                                                                                                                                                                                                                          | K12888                                   | HNRNPU; heterogeneou nucleic ribonucleo protein U                                                                            | dre03040 Spliceosome - Danio rerio (zebrafish);            | IPR003034; IPR027417; IPR001870; IPR003877;            | SAP domain; P-loop containing nucleoside triphosphate hydrolase; E30_2-SPRY domain; SPRY domain;                                                                   |
| B8A561 | myhz1.2 | Uncharacterized protein                                                                  | _AITDAAM(ox)M(ox)AEELK(cr)K_ | 1772 | 1 | AMMAEELKKEGDTSA | .....K.E..... | nuclear       | intracellular organelle; intracellular non-membrane-bounded organelle; cytoskeleton part; intracellular organelle part; macromolecular complex; intracellular part; cell; actin cytoskeleton; organelle part; non-membrane-bounded organelle; organelle; cytoskeleton; cell part; intracellular; myosin complex; protein complex;                                                                                                                                                                                                                                                                                                                                                                                         | ATP binding; motor activity; nucleoside phosphate binding; nucleoside binding; ion binding; hydrolase activity, acting on acid anhydrides; hydrolase activity; nucleotide binding; nucleoside-triphosphatase activity; organic cyclic compound binding; heterocyclic compound binding; ribonucleoside binding; carbohydrate derivative binding; pyrophosphatase activity; catalytic activity; ribonucleotide binding; binding; purine ribonucleoside binding; anion binding; purine ribonucleotide binding; adenylyl ribonucleotide binding; adenylyl nucleotide binding; purine nucleoside binding; hydrolase activity, acting on acid anhydrides, in phosphorus-containing anhydrides; purine nucleotide binding; small molecule binding; purine ribonucleoside triphosphate binding; | K10352                                   | MYH; myosin heavy chain                                                                                                      | dre04530 Tight junction - Danio rerio (zebrafish);         | IPR002928; IPR004009; IPR001609; IPR027417; IPR027401; | Myosin tail; Myosin, N-terminal, SH3-like; Myosin head, motor domain; P-loop containing nucleoside triphosphate hydrolase; Myosin-like IQ motif-containing domain; |
| B8A568 | myhz1.1 | Uncharacterized protein                                                                  | _AITDAAMAEELK(cr)K_          | 1772 | 1 | AMMAEELKKEGDTSA | .....K.E..... | nuclear       | intracellular organelle; intracellular non-membrane-bounded organelle; cytoskeleton part; intracellular organelle part; macromolecular complex; intracellular part; cell; actin cytoskeleton; organelle part; non-membrane-bounded organelle; organelle; cytoskeleton; cell part; intracellular; myosin complex; protein complex;                                                                                                                                                                                                                                                                                                                                                                                         | ATP binding; motor activity; nucleoside phosphate binding; nucleoside binding; ion binding; hydrolase activity, acting on acid anhydrides; hydrolase activity; nucleotide binding; nucleoside-triphosphatase activity; organic cyclic compound binding; heterocyclic compound binding; ribonucleoside binding; carbohydrate derivative binding; pyrophosphatase activity; catalytic activity; ribonucleotide binding; binding; purine ribonucleoside binding; anion binding; purine ribonucleotide binding; adenylyl ribonucleotide binding; adenylyl nucleotide binding; purine nucleoside binding; hydrolase activity, acting on acid anhydrides, in phosphorus-containing anhydrides; purine nucleotide binding; small molecule binding; purine ribonucleoside triphosphate binding; | K10352                                   | MYH; myosin heavy chain                                                                                                      | dre04530 Tight junction - Danio rerio (zebrafish);         | IPR002928; IPR004009; IPR001609; IPR027417; IPR027401; | Myosin tail; Myosin, N-terminal, SH3-like; Myosin head, motor domain; P-loop containing nucleoside triphosphate hydrolase; Myosin-like IQ motif-containing domain; |
| B8A561 | myhz1.2 | Uncharacterized protein                                                                  | _AITDAAMAEELK(cr)K_          | 1772 | 1 | AMMAEELKKEGDTSA | .....K.E..... | nuclear       | intracellular organelle; intracellular non-membrane-bounded organelle; cytoskeleton part; intracellular organelle part; macromolecular complex; intracellular part; cell; actin cytoskeleton; organelle part; non-membrane-bounded organelle; organelle; cytoskeleton; cell part; intracellular; myosin complex; protein complex;                                                                                                                                                                                                                                                                                                                                                                                         | ATP binding; motor activity; nucleoside phosphate binding; nucleoside binding; ion binding; hydrolase activity, acting on acid anhydrides; hydrolase activity; nucleotide binding; nucleoside-triphosphatase activity; organic cyclic compound binding; heterocyclic compound binding; ribonucleoside binding; carbohydrate derivative binding; pyrophosphatase activity; catalytic activity; ribonucleotide binding; binding; purine ribonucleoside binding; anion binding; purine ribonucleotide binding; adenylyl ribonucleotide binding; adenylyl nucleotide binding; purine nucleoside binding; hydrolase activity, acting on acid anhydrides, in phosphorus-containing anhydrides; purine nucleotide binding; small molecule binding; purine ribonucleoside triphosphate binding; | K10352                                   | MYH; myosin heavy chain                                                                                                      | dre04530 Tight junction - Danio rerio (zebrafish);         | IPR002928; IPR004009; IPR001609; IPR027417; IPR027401; | Myosin tail; Myosin, N-terminal, SH3-like; Myosin head, motor domain; P-loop containing nucleoside triphosphate hydrolase; Myosin-like IQ motif-containing domain; |

|        |         |                                       |                   |      |   |                 |               |                       |                                                                                                                                                                                                                                                                                                                                                                                                                                                                                                                                                                                                                                                                                                                                                                                                                                                             |                                                                                                                                                                                                                                                                                                                                                                                                                                                                                                                                                                                                                                                                                                                                                                                         |                                                                                                                                                                                                                                                                                                                                                                                                                                                                                                                                                                                                                                                                                                                                                                                          |                                               |                                                                                                                                                                                                                                                                                                                               |                                                                                                                                                                    |                                                                                        |
|--------|---------|---------------------------------------|-------------------|------|---|-----------------|---------------|-----------------------|-------------------------------------------------------------------------------------------------------------------------------------------------------------------------------------------------------------------------------------------------------------------------------------------------------------------------------------------------------------------------------------------------------------------------------------------------------------------------------------------------------------------------------------------------------------------------------------------------------------------------------------------------------------------------------------------------------------------------------------------------------------------------------------------------------------------------------------------------------------|-----------------------------------------------------------------------------------------------------------------------------------------------------------------------------------------------------------------------------------------------------------------------------------------------------------------------------------------------------------------------------------------------------------------------------------------------------------------------------------------------------------------------------------------------------------------------------------------------------------------------------------------------------------------------------------------------------------------------------------------------------------------------------------------|------------------------------------------------------------------------------------------------------------------------------------------------------------------------------------------------------------------------------------------------------------------------------------------------------------------------------------------------------------------------------------------------------------------------------------------------------------------------------------------------------------------------------------------------------------------------------------------------------------------------------------------------------------------------------------------------------------------------------------------------------------------------------------------|-----------------------------------------------|-------------------------------------------------------------------------------------------------------------------------------------------------------------------------------------------------------------------------------------------------------------------------------------------------------------------------------|--------------------------------------------------------------------------------------------------------------------------------------------------------------------|----------------------------------------------------------------------------------------|
| A5WWJ4 | matn1   | Uncharacterized protein               | _AK(cr)ALGFK_     | 393  | 1 | GDAAKKAKALGFKMY | .....K.L..... | extracellular         |                                                                                                                                                                                                                                                                                                                                                                                                                                                                                                                                                                                                                                                                                                                                                                                                                                                             | cation binding; metal ion binding; calcium ion binding; binding; ion binding;                                                                                                                                                                                                                                                                                                                                                                                                                                                                                                                                                                                                                                                                                                           |                                                                                                                                                                                                                                                                                                                                                                                                                                                                                                                                                                                                                                                                                                                                                                                          |                                               | Matrinin, coiled-coil trimerisation domain; Epidermal growth factor-like domain; von Willebrand factor, type A;                                                                                                                                                                                                               |                                                                                                                                                                    |                                                                                        |
| B8A568 | myhz1.1 | Uncharacterized protein               | _AK(cr)ANLEK_     | 1244 | 1 | MEAVAKAKANLEKMC |               | nuclear               | intracellular organelle; intracellular non-membrane-bounded organelle; cytoskeleton part; intracellular organelle part; macromolecular complex; intracellular part; cell; actin cytoskeleton; organelle part; non-membrane-bounded organelle; organelle; cytoskeleton; cell part; intracellular; myosin complex; protein complex;                                                                                                                                                                                                                                                                                                                                                                                                                                                                                                                           | ATP binding; motor activity; nucleoside phosphate binding; nucleoside binding; ion binding; hydrolase activity, acting on acid anhydrides; hydrolase activity; nucleotide binding; nucleoside-triphosphatase activity; organic cyclic compound binding; heterocyclic compound binding; ribonucleoside binding; carbohydrate derivative binding; pyrophosphatase activity; catalytic activity; ribonucleotide binding; binding; purine ribonucleoside binding; anion binding; purine ribonucleotide binding; adenylyl ribonucleotide binding; adenylyl nucleotide binding; purine nucleoside binding; hydrolase activity, acting on acid anhydrides, in phosphorus-containing anhydrides; purine nucleotide binding; small molecule binding; purine ribonucleoside triphosphate binding; | K10352                                                                                                                                                                                                                                                                                                                                                                                                                                                                                                                                                                                                                                                                                                                                                                                   | MYH; myosin heavy chain                       | dre04530 Tight junction - Danio rerio (zebrafish);                                                                                                                                                                                                                                                                            | Myosin tail; Myosin, N-terminal, SH3-like; Myosin head; motor domain; P-loop containing nucleoside triphosphate hydrolase; Myosin-like IQ motif-containing domain; |                                                                                        |
| B8A561 | myhz1.2 | Uncharacterized protein               | _AK(cr)ANLEK_     | 1244 | 1 | MEAVAKAKANLEKMC |               | nuclear               | intracellular organelle; intracellular non-membrane-bounded organelle; cytoskeleton part; intracellular organelle part; macromolecular complex; intracellular part; cell; actin cytoskeleton; organelle part; non-membrane-bounded organelle; organelle; cytoskeleton; cell part; intracellular; myosin complex; protein complex;                                                                                                                                                                                                                                                                                                                                                                                                                                                                                                                           | ATP binding; motor activity; nucleoside phosphate binding; nucleoside binding; ion binding; hydrolase activity, acting on acid anhydrides; hydrolase activity; nucleotide binding; nucleoside-triphosphatase activity; organic cyclic compound binding; heterocyclic compound binding; ribonucleoside binding; carbohydrate derivative binding; pyrophosphatase activity; catalytic activity; ribonucleotide binding; binding; purine ribonucleoside binding; anion binding; purine ribonucleotide binding; adenylyl ribonucleotide binding; adenylyl nucleotide binding; purine nucleoside binding; hydrolase activity, acting on acid anhydrides, in phosphorus-containing anhydrides; purine nucleotide binding; small molecule binding; purine ribonucleoside triphosphate binding; | K10352                                                                                                                                                                                                                                                                                                                                                                                                                                                                                                                                                                                                                                                                                                                                                                                   | MYH; myosin heavy chain                       | dre04530 Tight junction - Danio rerio (zebrafish);                                                                                                                                                                                                                                                                            | Myosin tail; Myosin, N-terminal, SH3-like; Myosin head; motor domain; P-loop containing nucleoside triphosphate hydrolase; Myosin-like IQ motif-containing domain; |                                                                                        |
| Q6PBZ1 | rp17a   | Uncharacterized protein               | _AK(cr)ELATK_     | 259  | 1 | KLEKAKAKELATKLG | .....K.L..... | plasma membrane       | cellular component biogenesis; ribosome biogenesis; ribonucleoprotein complex biogenesis; cellular component organization or biogenesis;                                                                                                                                                                                                                                                                                                                                                                                                                                                                                                                                                                                                                                                                                                                    | ribosome; organelle; intracellular organelle; intracellular non-membrane-bounded organelle; cell part; intracellular; cytoplasm; macromolecular complex; intracellular part; cell; ribonucleoprotein complex; cytoplasmic part; non-membrane-bounded organelle;                                                                                                                                                                                                                                                                                                                                                                                                                                                                                                                         | K02936                                                                                                                                                                                                                                                                                                                                                                                                                                                                                                                                                                                                                                                                                                                                                                                   | RP-L7Ae; large subunit ribosomal protein L7Ae | dre03010 Ribosome - Danio rerio (zebrafish);                                                                                                                                                                                                                                                                                  | 50S ribosomal protein L30e-like; Ribosomal protein L7Ae/L30e/S12e/Gad445;                                                                                          |                                                                                        |
| Q6Y49  | uch1    | Ubiquitin carboxyl-terminal hydrolase | _AK(cr)EIQNK_     | 126  | 1 | MSPAERAKELEONKA | .....K.L..... | cytosol               | modification-dependent macromolecule catabolic process; cellular macromolecule catabolic process; proteolysis involved in cellular protein catabolic process; cellular protein catabolic process; modification-dependent protein catabolic process; cellular protein metabolic process; ubiquitin-dependent protein catabolic process; primary metabolic process; cellular metabolic process; organic substance metabolic process; organic substance catabolic process; metabolic process; protein catabolic process; macromolecule catabolic process; cellular macromolecule metabolic process; cellular catabolic process; proteolysis; protein metabolic process; macromolecule metabolic process; cellular process; catabolic process;                                                                                                                  | cell; intracellular; cell part;                                                                                                                                                                                                                                                                                                                                                                                                                                                                                                                                                                                                                                                                                                                                                         | K05611                                                                                                                                                                                                                                                                                                                                                                                                                                                                                                                                                                                                                                                                                                                                                                                   |                                               | IPR001578;                                                                                                                                                                                                                                                                                                                    | Peptidase C12, ubiquitin carboxyl-terminal hydrolase;                                                                                                              |                                                                                        |
| Q5T2Z9 | apobb.1 | Uncharacterized protein               | _AK(cr)QLLNLLGNR_ | 2161 | 1 | SKLEKAKQLLNLLG  | .....K.L..... | endoplasmic reticulum | response to chemical; response to stimulus;                                                                                                                                                                                                                                                                                                                                                                                                                                                                                                                                                                                                                                                                                                                                                                                                                 | lipid transporter activity; substrate-specific transporter activity; transporter activity;                                                                                                                                                                                                                                                                                                                                                                                                                                                                                                                                                                                                                                                                                              |                                                                                                                                                                                                                                                                                                                                                                                                                                                                                                                                                                                                                                                                                                                                                                                          |                                               | Vitellogenin, superfamily; Vitellogenin, open beta-sheet, subdomain 1; Vitellogenin, open beta-sheet, subdomain 2; Lipid transport protein, N-terminal; Lipid transport protein, beta-sheet shell; Vitellogenin, beta-sheet N-terminal; Armadillo-type fold; Vitellogenin, open beta-sheet; Lipid transport, open beta-sheet; |                                                                                                                                                                    |                                                                                        |
| P79735 | ran     | GTP-binding nuclear protein Ran       | _AK(cr)SIVFHR_    | 133  | 1 | KDRKVKAKSIVFHRK | .....K.L..... | cytosol               | regulation of cellular process; single organism signaling; cellular response to stimulus; intracellular transport; intracellular signal transduction; single-organism cellular process; single-organism process; nuclear transport; organic substance transport; small GTPase mediated signal transduction; signaling; response to stimulus; protein transport; establishment of localization; cellular localization; transport; establishment of protein localization; signal transduction; cellular macromolecule localization; regulation of biological process; establishment of localization in cell; cell communication; intracellular protein transport; nucleocytoplasmic transport; cytoplasmic transport; localization; cellular protein localization; macromolecule localization; protein localization; cellular process; biological regulation; | organelle; intracellular membrane-bounded organelle; intracellular organelle; nucleus; cell part; intracellular; intracellular part; membrane-bounded organelle; cell;                                                                                                                                                                                                                                                                                                                                                                                                                                                                                                                                                                                                                  | nucleoside phosphate binding; nucleoside binding; ion binding; hydrolase activity, acting on acid anhydrides; hydrolase activity; nucleotide binding; nucleoside-triphosphatase activity; organic cyclic compound binding; heterocyclic compound binding; ribonucleoside binding; carbohydrate derivative binding; pyrophosphatase activity; catalytic activity; ribonucleotide binding; binding; GTPase activity; purine ribonucleoside binding; anion binding; purine ribonucleotide binding; purine nucleoside binding; guanylyl ribonucleotide binding; hydrolase activity, acting on acid anhydrides, in phosphorus-containing anhydrides; guanylyl nucleotide binding; GTP binding; purine nucleotide binding; small molecule binding; purine ribonucleoside triphosphate binding; | K07936                                        | RAN; GTP-binding nuclear protein Ran                                                                                                                                                                                                                                                                                          | dre03013 RNA transport - Danio rerio (zebrafish); dre03008 Ribosome biogenesis in eukaryotes - Danio rerio (zebrafish);                                            | Small GTP-binding protein domain; P-loop containing nucleoside triphosphate hydrolase; |

|        |         |                                                 |                                       |      |   |                  |               |               |                                                                                                                                                                                                                                                                                                                                                                                                                                                                                                                                                                                                                                                                                                                                                                                                                                                                                                                                                                               |                                                                                                                                                                |                                                                                                                                                                                                                                                                                                                                                                                                                                                                                                                                                                                                                                                                                                                                                                                         |                       |                                                 |                                                                                                                                             |                                                    |                                                        |                                                                                                                                                                    |
|--------|---------|-------------------------------------------------|---------------------------------------|------|---|------------------|---------------|---------------|-------------------------------------------------------------------------------------------------------------------------------------------------------------------------------------------------------------------------------------------------------------------------------------------------------------------------------------------------------------------------------------------------------------------------------------------------------------------------------------------------------------------------------------------------------------------------------------------------------------------------------------------------------------------------------------------------------------------------------------------------------------------------------------------------------------------------------------------------------------------------------------------------------------------------------------------------------------------------------|----------------------------------------------------------------------------------------------------------------------------------------------------------------|-----------------------------------------------------------------------------------------------------------------------------------------------------------------------------------------------------------------------------------------------------------------------------------------------------------------------------------------------------------------------------------------------------------------------------------------------------------------------------------------------------------------------------------------------------------------------------------------------------------------------------------------------------------------------------------------------------------------------------------------------------------------------------------------|-----------------------|-------------------------------------------------|---------------------------------------------------------------------------------------------------------------------------------------------|----------------------------------------------------|--------------------------------------------------------|--------------------------------------------------------------------------------------------------------------------------------------------------------------------|
| E9QEQ1 | apoc2   | Uncharacterized protein                         | _AK(cr)/TIYSDTVVR_                    | 69   | 1 | YKLEEKAKTIYSDTV  | .....K.I..... | extracellular | single-organism process; lipoprotein metabolic process; establishment of localization; organic substance metabolic process; metabolic process; single-organism localization; positive regulation of metabolic process; positive regulation of molecular function; protein metabolic process; macromolecule metabolic process; lipoprotein catabolic process; macromolecule localization; lipid metabolic process; single-organism transport; lipid transport; lipid localization; organic substance transport; primary metabolic process; positive regulation of biological process; positive regulation of catalytic activity; transport; organic substance catabolic process; regulation of biological process; single-organism metabolic process; protein catabolic process; regulation of catalytic activity; macromolecule catabolic process; regulation of metabolic process; regulation of molecular function; localization; catabolic process; biological regulation; | macromolecular complex; extracellular region part; extracellular space; chylomicron; protein-lipid complex; extracellular region; plasma lipoprotein particle; | enzyme regulator activity; molecular function regulator; enzyme activator activity;                                                                                                                                                                                                                                                                                                                                                                                                                                                                                                                                                                                                                                                                                                     | IPR023121;            | Apoc-II domain;                                 |                                                                                                                                             |                                                    |                                                        |                                                                                                                                                                    |
| Q6P027 | rlbp1b  | Cellular retinaldehyde-binding protein b        | _AKDELNETDEK(cr)R_                    | 58   | 1 | ELNETDEKRTSAVKE  |               | cytosol       | behavior: single-multicellular organism process; response to light stimulus; visual behavior; response to abiotic stimulus; single-organism process; response to radiation; response to stimulus; optokinetic behavior; multicellular organismal process; single-organism behavior;                                                                                                                                                                                                                                                                                                                                                                                                                                                                                                                                                                                                                                                                                           | cell; intracellular; cell part;                                                                                                                                | transporter activity;                                                                                                                                                                                                                                                                                                                                                                                                                                                                                                                                                                                                                                                                                                                                                                   | IPR001251; IPR011074; | CRAL-TRIO domain; CRAL-TRIO, N-terminal domain; |                                                                                                                                             |                                                    |                                                        |                                                                                                                                                                    |
| B8JKH7 | myt3    | Uncharacterized protein                         | _ALGNPTNK(cr)DVK_                     | 71   | 1 | LGNPTNKDVKKILG   | .....K.V..... | mitochondria  |                                                                                                                                                                                                                                                                                                                                                                                                                                                                                                                                                                                                                                                                                                                                                                                                                                                                                                                                                                               |                                                                                                                                                                | cation binding; metal ion binding; calcium ion binding; binding; ion binding;                                                                                                                                                                                                                                                                                                                                                                                                                                                                                                                                                                                                                                                                                                           | IPR002048; IPR011992; | EF-hand domain; EF-hand domain pair;            |                                                                                                                                             |                                                    |                                                        |                                                                                                                                                                    |
| Q9IBU7 | myt3    | Fast skeletal muscle myosin light polypeptide 3 | _ALGNPTNK(cr)DVK_                     | 47   | 1 | LGNPTNKDVKKILG   | .....K.V..... | cytosol       |                                                                                                                                                                                                                                                                                                                                                                                                                                                                                                                                                                                                                                                                                                                                                                                                                                                                                                                                                                               |                                                                                                                                                                | cation binding; metal ion binding; calcium ion binding; binding; ion binding;                                                                                                                                                                                                                                                                                                                                                                                                                                                                                                                                                                                                                                                                                                           | IPR011992; IPR002048; | EF-hand domain pair; EF-hand domain;            |                                                                                                                                             |                                                    |                                                        |                                                                                                                                                                    |
| Q6P0G6 | my1     | Uncharacterized protein                         | _ALGNPTNK(cr)EVTK_                    | 85   | 1 | LGNPTNKEVTKILG   | .....K.V..... | cytosol       |                                                                                                                                                                                                                                                                                                                                                                                                                                                                                                                                                                                                                                                                                                                                                                                                                                                                                                                                                                               |                                                                                                                                                                | cation binding; metal ion binding; calcium ion binding; binding; ion binding;                                                                                                                                                                                                                                                                                                                                                                                                                                                                                                                                                                                                                                                                                                           | K05738                | IPR002048; IPR011992;                           | EF-hand domain; EF-hand domain pair;                                                                                                        |                                                    |                                                        |                                                                                                                                                                    |
| P13104 | tpma    | Uncharacterized protein                         | _ALK(cr)DEEK_                         | 136  | 1 | VIENRALKDEEKMEL  | .E....K.....  | cytosol       | cytoskeleton; organelle; intracellular organelle; intracellular non-membrane-bounded organelle; cell part; intracellular; cytoplasm; intracellular part; cell; non-membrane-bounded organelle;                                                                                                                                                                                                                                                                                                                                                                                                                                                                                                                                                                                                                                                                                                                                                                                |                                                                                                                                                                |                                                                                                                                                                                                                                                                                                                                                                                                                                                                                                                                                                                                                                                                                                                                                                                         | K10373                | TPM1; tropomyosin 1                             | described cardiac muscle contraction - Danio rerio (zebrafish); dre04261 Adrenergic signalling in cardiomyocytes - Danio rerio (zebrafish); |                                                    |                                                        |                                                                                                                                                                    |
| B8A568 | myhz1.1 | Uncharacterized protein                         | _ALQEAHQOTLDDLQAEEDK(cr)VNTLTK_       | 1018 | 1 | DLQAEEDKVNLTLS   | .....DK.....  | nuclear       | intracellular organelle; intracellular non-membrane-bounded organelle; cytoskeleton part; intracellular organelle part; macromolecular complex; intracellular part; cell; actin cytoskeleton; organelle part; non-membrane-bounded organelle; organelle; cytoskeleton; cell part; intracellular; myosin complex; protein complex;                                                                                                                                                                                                                                                                                                                                                                                                                                                                                                                                                                                                                                             |                                                                                                                                                                | ATP binding; motor activity; nucleoside phosphate binding; nucleoside binding; ion binding; hydrolase activity, acting on acid anhydrides; hydrolase activity; nucleotide binding; nucleoside-triphosphatase activity; organic cyclic compound binding; heterocyclic compound binding; ribonucleoside binding; carbohydrate derivative binding; pyrophosphatase activity; catalytic activity; ribonucleotide binding; binding; purine ribonucleoside binding; anion binding; purine ribonucleotide binding; adenylyl ribonucleotide binding; adenylyl nucleotide binding; purine nucleoside binding; hydrolase activity, acting on acid anhydrides, in phosphorus-containing anhydrides; purine nucleotide binding; small molecule binding; purine ribonucleoside triphosphate binding; |                       | K10352                                          | MYH; myosin heavy chain                                                                                                                     | dre04530 Tight junction - Danio rerio (zebrafish); | IPR002928; IPR004009; IPR001609; IPR027417; IPR027401; | Myosin tail; Myosin, N-terminal, SH3-like; Myosin head, motor domain; P-loop containing nucleoside triphosphate hydrolase; Myosin-like IQ motif-containing domain; |
| B8A561 | myhz1.2 | Uncharacterized protein                         | _ALQEAHQOTLDDLQAEEDK(cr)VNTLTK_       | 1018 | 1 | DLQAEEDKVNLTLS   | .....DK.....  | nuclear       | intracellular organelle; intracellular non-membrane-bounded organelle; cytoskeleton part; intracellular organelle part; macromolecular complex; intracellular part; cell; actin cytoskeleton; organelle part; non-membrane-bounded organelle; organelle; cytoskeleton; cell part; intracellular; myosin complex; protein complex;                                                                                                                                                                                                                                                                                                                                                                                                                                                                                                                                                                                                                                             |                                                                                                                                                                | ATP binding; motor activity; nucleoside phosphate binding; nucleoside binding; ion binding; hydrolase activity, acting on acid anhydrides; hydrolase activity; nucleotide binding; nucleoside-triphosphatase activity; organic cyclic compound binding; heterocyclic compound binding; ribonucleoside binding; carbohydrate derivative binding; pyrophosphatase activity; catalytic activity; ribonucleotide binding; binding; purine ribonucleoside binding; anion binding; purine ribonucleotide binding; adenylyl ribonucleotide binding; adenylyl nucleotide binding; purine nucleoside binding; hydrolase activity, acting on acid anhydrides, in phosphorus-containing anhydrides; purine nucleotide binding; small molecule binding; purine ribonucleoside triphosphate binding; |                       | K10352                                          | MYH; myosin heavy chain                                                                                                                     | dre04530 Tight junction - Danio rerio (zebrafish); | IPR002928; IPR004009; IPR001609; IPR027417; IPR027401; | Myosin tail; Myosin, N-terminal, SH3-like; Myosin head, motor domain; P-loop containing nucleoside triphosphate hydrolase; Myosin-like IQ motif-containing domain; |
| B8A568 | myhz1.1 | Uncharacterized protein                         | _ALQEAHQOTLDDLQAEEDK(cr)VNTLTK(cr)SK_ | 1024 | 1 | DKVNLTLSKSKTLQEK |               | nuclear       | intracellular organelle; intracellular non-membrane-bounded organelle; cytoskeleton part; intracellular organelle part; macromolecular complex; intracellular part; cell; actin cytoskeleton; organelle part; non-membrane-bounded organelle; organelle; cytoskeleton; cell part; intracellular; myosin complex; protein complex;                                                                                                                                                                                                                                                                                                                                                                                                                                                                                                                                                                                                                                             |                                                                                                                                                                | ATP binding; motor activity; nucleoside phosphate binding; nucleoside binding; ion binding; hydrolase activity, acting on acid anhydrides; hydrolase activity; nucleotide binding; nucleoside-triphosphatase activity; organic cyclic compound binding; heterocyclic compound binding; ribonucleoside binding; carbohydrate derivative binding; pyrophosphatase activity; catalytic activity; ribonucleotide binding; binding; purine ribonucleoside binding; anion binding; purine ribonucleotide binding; adenylyl ribonucleotide binding; adenylyl nucleotide binding; purine nucleoside binding; hydrolase activity, acting on acid anhydrides, in phosphorus-containing anhydrides; purine nucleotide binding; small molecule binding; purine ribonucleoside triphosphate binding; |                       | K10352                                          | MYH; myosin heavy chain                                                                                                                     | dre04530 Tight junction - Danio rerio (zebrafish); | IPR002928; IPR004009; IPR001609; IPR027417; IPR027401; | Myosin tail; Myosin, N-terminal, SH3-like; Myosin head, motor domain; P-loop containing nucleoside triphosphate hydrolase; Myosin-like IQ motif-containing domain; |
| B8A561 | myhz1.2 | Uncharacterized protein                         | _ALQEAHQOTLDDLQAEEDK(cr)VNTLTK(cr)SK_ | 1024 | 1 | DKVNLTLSKSKTLQEK |               | nuclear       | intracellular organelle; intracellular non-membrane-bounded organelle; cytoskeleton part; intracellular organelle part; macromolecular complex; intracellular part; cell; actin cytoskeleton; organelle part; non-membrane-bounded organelle; organelle; cytoskeleton; cell part; intracellular; myosin complex; protein complex;                                                                                                                                                                                                                                                                                                                                                                                                                                                                                                                                                                                                                                             |                                                                                                                                                                | ATP binding; motor activity; nucleoside phosphate binding; nucleoside binding; ion binding; hydrolase activity, acting on acid anhydrides; hydrolase activity; nucleotide binding; nucleoside-triphosphatase activity; organic cyclic compound binding; heterocyclic compound binding; ribonucleoside binding; carbohydrate derivative binding; pyrophosphatase activity; catalytic activity; ribonucleotide binding; binding; purine ribonucleoside binding; anion binding; purine ribonucleotide binding; adenylyl ribonucleotide binding; adenylyl nucleotide binding; purine nucleoside binding; hydrolase activity, acting on acid anhydrides, in phosphorus-containing anhydrides; purine nucleotide binding; small molecule binding; purine ribonucleoside triphosphate binding; |                       | K10352                                          | MYH; myosin heavy chain                                                                                                                     | dre04530 Tight junction - Danio rerio (zebrafish); | IPR002928; IPR004009; IPR001609; IPR027417; IPR027401; | Myosin tail; Myosin, N-terminal, SH3-like; Myosin head, motor domain; P-loop containing nucleoside triphosphate hydrolase; Myosin-like IQ motif-containing domain; |
| Q9IBV0 | pvalb2  | Parvalbumin-2                                   | _ALDTAETK(cr)AFLSAGSDGDGK_            | 84   | 1 | ALDTAETKAFLSAGD  |               | cytosol       |                                                                                                                                                                                                                                                                                                                                                                                                                                                                                                                                                                                                                                                                                                                                                                                                                                                                                                                                                                               |                                                                                                                                                                | cation binding; metal ion binding; calcium ion binding; binding; ion binding;                                                                                                                                                                                                                                                                                                                                                                                                                                                                                                                                                                                                                                                                                                           | IPR002048; IPR011992; | EF-hand domain; EF-hand domain pair;            |                                                                                                                                             |                                                    |                                                        |                                                                                                                                                                    |

|        |          |                                 |                         |      |   |                               |                 |                                                                                                                                                                                                                                                                                                                                                                                                                                                                                                                                                                                                                                                                                                                                                                                                                                                                                                                                                                                                                                                                                                                                                                                                                          |                                                                                                                                                                                                                                                                                                                                                                                                                                                                                                                                                                                                                                                                                                                                                                                         |                                                                                                                                                                                                                                                                                                                                                                                                                                                                                                                                                                                                                                                                                                                                                                                                                                                                                                                                                                                                                                                                                                                                                                                                                                                                                                                                                                                                                                                                                                                                                                                                                                                                                                                                                                                                                                                                                                                                      |                                      |                                                    |                                                                                                                                                                    |                                                               |                                                                                                                                                                                                                   |
|--------|----------|---------------------------------|-------------------------|------|---|-------------------------------|-----------------|--------------------------------------------------------------------------------------------------------------------------------------------------------------------------------------------------------------------------------------------------------------------------------------------------------------------------------------------------------------------------------------------------------------------------------------------------------------------------------------------------------------------------------------------------------------------------------------------------------------------------------------------------------------------------------------------------------------------------------------------------------------------------------------------------------------------------------------------------------------------------------------------------------------------------------------------------------------------------------------------------------------------------------------------------------------------------------------------------------------------------------------------------------------------------------------------------------------------------|-----------------------------------------------------------------------------------------------------------------------------------------------------------------------------------------------------------------------------------------------------------------------------------------------------------------------------------------------------------------------------------------------------------------------------------------------------------------------------------------------------------------------------------------------------------------------------------------------------------------------------------------------------------------------------------------------------------------------------------------------------------------------------------------|--------------------------------------------------------------------------------------------------------------------------------------------------------------------------------------------------------------------------------------------------------------------------------------------------------------------------------------------------------------------------------------------------------------------------------------------------------------------------------------------------------------------------------------------------------------------------------------------------------------------------------------------------------------------------------------------------------------------------------------------------------------------------------------------------------------------------------------------------------------------------------------------------------------------------------------------------------------------------------------------------------------------------------------------------------------------------------------------------------------------------------------------------------------------------------------------------------------------------------------------------------------------------------------------------------------------------------------------------------------------------------------------------------------------------------------------------------------------------------------------------------------------------------------------------------------------------------------------------------------------------------------------------------------------------------------------------------------------------------------------------------------------------------------------------------------------------------------------------------------------------------------------------------------------------------------|--------------------------------------|----------------------------------------------------|--------------------------------------------------------------------------------------------------------------------------------------------------------------------|---------------------------------------------------------------|-------------------------------------------------------------------------------------------------------------------------------------------------------------------------------------------------------------------|
| Q6IMW7 | pvalb4   | Parvalbumin 4                   | _ALTDGETK(cr)TFLK_      | 84   | 1 | ALTDGETKTLKAGD                | cytosol         | cation binding; metal ion binding; calcium ion binding; binding; ion binding;                                                                                                                                                                                                                                                                                                                                                                                                                                                                                                                                                                                                                                                                                                                                                                                                                                                                                                                                                                                                                                                                                                                                            |                                                                                                                                                                                                                                                                                                                                                                                                                                                                                                                                                                                                                                                                                                                                                                                         | IPR011992; IPR002048                                                                                                                                                                                                                                                                                                                                                                                                                                                                                                                                                                                                                                                                                                                                                                                                                                                                                                                                                                                                                                                                                                                                                                                                                                                                                                                                                                                                                                                                                                                                                                                                                                                                                                                                                                                                                                                                                                                 | EF-hand domain pair; EF-hand domain; |                                                    |                                                                                                                                                                    |                                                               |                                                                                                                                                                                                                   |
| E9QDY3 | cyt1     | Uncharacterized protein         | _ANADLELK(cr)R_         | 134  | 1 | ANADLELKIRQFLDS               | mitochondria    | intracellular organelle; intracellular non-membrane-bounded organelle; cytoskeletal part; intracellular organelle part; macromolecular complex; intracellular part; cell; organelle part; non-membrane-bounded organelle; organelle; cytoskeleton; intermediate filament cytoskeleton; cell part; intracellular; intermediate filament; protein complex;                                                                                                                                                                                                                                                                                                                                                                                                                                                                                                                                                                                                                                                                                                                                                                                                                                                                 | structural molecule activity;                                                                                                                                                                                                                                                                                                                                                                                                                                                                                                                                                                                                                                                                                                                                                           | K07604                                                                                                                                                                                                                                                                                                                                                                                                                                                                                                                                                                                                                                                                                                                                                                                                                                                                                                                                                                                                                                                                                                                                                                                                                                                                                                                                                                                                                                                                                                                                                                                                                                                                                                                                                                                                                                                                                                                               |                                      |                                                    |                                                                                                                                                                    |                                                               |                                                                                                                                                                                                                   |
| B8A568 | myh2.1   | Uncharacterized protein         | _ANALAANLKD(cr)K_       | 1446 | 1 | ALAANLKKQRNFDK .....DK.....   | nuclear         | intracellular organelle; intracellular non-membrane-bounded organelle; cytoskeletal part; intracellular organelle part; macromolecular complex; intracellular part; cell; actin cytoskeleton; organelle part; non-membrane-bounded organelle; organelle; cytoskeleton; cell part; intracellular; myosin complex; protein complex;                                                                                                                                                                                                                                                                                                                                                                                                                                                                                                                                                                                                                                                                                                                                                                                                                                                                                        | ATP binding; motor activity; nucleoside phosphate binding; nucleoside binding; ion binding; hydrolase activity, acting on acid anhydrides; hydrolase activity; nucleotide binding; nucleoside-triphosphatase activity; organic cyclic compound binding; heterocyclic compound binding; ribonucleoside binding; carbohydrate derivative binding; pyrophosphatase activity; catalytic activity; ribonucleotide binding; binding; purine ribonucleoside binding; anion binding; purine ribonucleotide binding; adenylyl ribonucleotide binding; adenylyl nucleotide binding; purine nucleoside binding; hydrolase activity, acting on acid anhydrides, in phosphorus-containing anhydrides; purine nucleotide binding; small molecule binding; purine ribonucleoside triphosphate binding; | K10352                                                                                                                                                                                                                                                                                                                                                                                                                                                                                                                                                                                                                                                                                                                                                                                                                                                                                                                                                                                                                                                                                                                                                                                                                                                                                                                                                                                                                                                                                                                                                                                                                                                                                                                                                                                                                                                                                                                               | MYH; myosin heavy chain              | dre04530 Tight junction - Danio rerio (zebrafish); | Myosin tail; Myosin, N-terminal, SH3-like; Myosin head, motor domain; P-loop containing nucleoside triphosphate hydrolase; Myosin-like IQ motif-containing domain; |                                                               |                                                                                                                                                                                                                   |
| B8A561 | myh2.2   | Uncharacterized protein         | _ANALAANLKD(cr)K_       | 1446 | 1 | ALAANLKKQRNFDK .....DK.....   | nuclear         | intracellular organelle; intracellular non-membrane-bounded organelle; cytoskeletal part; intracellular organelle part; macromolecular complex; intracellular part; cell; actin cytoskeleton; organelle part; non-membrane-bounded organelle; organelle; cytoskeleton; cell part; intracellular; myosin complex; protein complex;                                                                                                                                                                                                                                                                                                                                                                                                                                                                                                                                                                                                                                                                                                                                                                                                                                                                                        | ATP binding; motor activity; nucleoside phosphate binding; nucleoside binding; ion binding; hydrolase activity, acting on acid anhydrides; hydrolase activity; nucleotide binding; nucleoside-triphosphatase activity; organic cyclic compound binding; heterocyclic compound binding; ribonucleoside binding; carbohydrate derivative binding; pyrophosphatase activity; catalytic activity; ribonucleotide binding; binding; purine ribonucleoside binding; anion binding; purine ribonucleotide binding; adenylyl ribonucleotide binding; adenylyl nucleotide binding; purine nucleoside binding; hydrolase activity, acting on acid anhydrides, in phosphorus-containing anhydrides; purine nucleotide binding; small molecule binding; purine ribonucleoside triphosphate binding; | K10352                                                                                                                                                                                                                                                                                                                                                                                                                                                                                                                                                                                                                                                                                                                                                                                                                                                                                                                                                                                                                                                                                                                                                                                                                                                                                                                                                                                                                                                                                                                                                                                                                                                                                                                                                                                                                                                                                                                               | MYH; myosin heavy chain              | dre04530 Tight junction - Danio rerio (zebrafish); | Myosin tail; Myosin, N-terminal, SH3-like; Myosin head, motor domain; P-loop containing nucleoside triphosphate hydrolase; Myosin-like IQ motif-containing domain; |                                                               |                                                                                                                                                                                                                   |
| Q0D2W2 | tnni2a.4 | Troponin I, skeletal, fast 2b.2 | _ANLKRQVVK_             | 138  | 1 | MDLRANLQVQVKEK .....K.V.....  | mitochondria    | cellular protein metabolic process; biosynthetic process; primary metabolic process; cellular metabolic process; organic substance biosynthetic process; cellular biosynthetic process; organic substance metabolic process; metabolic process; cellular macromolecule biosynthetic process; cellular macromolecule metabolic process; gene expression; macromolecule metabolic process; protein metabolic process; macromolecule biosynthetic process; translation; cellular process;                                                                                                                                                                                                                                                                                                                                                                                                                                                                                                                                                                                                                                                                                                                                   | intracellular organelle; ribosome; intracellular non-membrane-bounded organelle; small ribosomal subunit; cytoplasm; intracellular organelle part; macromolecular complex; intracellular part; cell; organelle part; non-membrane-bounded organelle; organelle; ribosomal subunit; cell part; intracellular; ribonucleoprotein complex; cytoplasmic part;                                                                                                                                                                                                                                                                                                                                                                                                                               | structural constituent of ribosome; structural molecule activity;                                                                                                                                                                                                                                                                                                                                                                                                                                                                                                                                                                                                                                                                                                                                                                                                                                                                                                                                                                                                                                                                                                                                                                                                                                                                                                                                                                                                                                                                                                                                                                                                                                                                                                                                                                                                                                                                    |                                      |                                                    |                                                                                                                                                                    |                                                               |                                                                                                                                                                                                                   |
| A8KB78 | rps23    | Uncharacterized protein         | _ANPFGGASHAK(cr)GIVLEK_ | 48   | 1 | FGGASHAKGIVLEK .....K.L.L.... | cytosol         | cellular protein metabolic process; biosynthetic process; primary metabolic process; cellular metabolic process; organic substance biosynthetic process; cellular biosynthetic process; organic substance metabolic process; metabolic process; cellular macromolecule biosynthetic process; cellular macromolecule metabolic process; gene expression; macromolecule metabolic process; protein metabolic process; macromolecule biosynthetic process; translation; cellular process;                                                                                                                                                                                                                                                                                                                                                                                                                                                                                                                                                                                                                                                                                                                                   | intracellular organelle; ribosome; intracellular non-membrane-bounded organelle; small ribosomal subunit; cytoplasm; intracellular organelle part; macromolecular complex; intracellular part; cell; organelle part; non-membrane-bounded organelle; organelle; ribosomal subunit; cell part; intracellular; ribonucleoprotein complex; cytoplasmic part;                                                                                                                                                                                                                                                                                                                                                                                                                               | structural constituent of ribosome; structural molecule activity;                                                                                                                                                                                                                                                                                                                                                                                                                                                                                                                                                                                                                                                                                                                                                                                                                                                                                                                                                                                                                                                                                                                                                                                                                                                                                                                                                                                                                                                                                                                                                                                                                                                                                                                                                                                                                                                                    | K02973                               | RP-S23e; small subunit ribosomal protein S23e      | dre03010 Ribosome - Danio rerio (zebrafish);                                                                                                                       | Nucleic acid-binding, OB-fold;                                |                                                                                                                                                                                                                   |
| F1Q6U4 | hbae3    | Uncharacterized protein         | _ANVK(cr)AFFDK_         | 12   | 1 | AKDKANVKAFDFKVA               | cytosol         | cell part; intracellular; hemoglobin complex; cytoplasm; macromolecular complex; intracellular part; cytosolic part; protein complex; cell; cytosol; cytoplasmic part;                                                                                                                                                                                                                                                                                                                                                                                                                                                                                                                                                                                                                                                                                                                                                                                                                                                                                                                                                                                                                                                   | organic cyclic compound binding; heterocyclic compound binding; heme binding; iron ion binding; transition metal ion binding; oxygen binding; binding; ion binding; substrate-specific transporter activity; metal ion binding; cation binding; oxygen transporter activity; tetrapyrrole binding; transporter activity;                                                                                                                                                                                                                                                                                                                                                                                                                                                                |                                                                                                                                                                                                                                                                                                                                                                                                                                                                                                                                                                                                                                                                                                                                                                                                                                                                                                                                                                                                                                                                                                                                                                                                                                                                                                                                                                                                                                                                                                                                                                                                                                                                                                                                                                                                                                                                                                                                      |                                      | IPR009050; IPR009071; IPR012292;                   | Globin-like; Globin; Globin, structural domain;                                                                                                                    |                                                               |                                                                                                                                                                                                                   |
| Q642Z0 | atp2a1   | Calcium-transporting ATPase     | _APVGNK(cr)M(x)FVK_     | 511  | 1 | SKAPVGNKMFVKGAP               | plasma membrane | nucleoside metabolic process; purine nucleoside metabolic process; purine ribonucleoside monophosphate metabolic process; nucleotide metabolic process; single-organism process; purine ribonucleoside biosynthetic process; nucleoside biosynthetic process; biosynthetic process; ribonucleoside monophosphate biosynthetic process; cellular metabolic process; phosphate-containing compound metabolic process; ribose phosphate biosynthetic process; metabolic process; carbohydrate derivative biosynthetic process; nucleoside phosphate metabolic process; ribose phosphate metabolic process; purine nucleoside triphosphate biosynthetic process; heterocycle biosynthetic process; purine ribonucleoside triphosphate biosynthetic process; small molecule metabolic process; ATP biosynthetic process; single-organism cellular process; purine ribonucleoside triphosphate metabolic process; organic cyclic compound metabolic process; purine-containing compound metabolic process; ribonucleoside triphosphate metabolic process; purine ribonucleoside monophosphate biosynthetic process; purine nucleoside biosynthetic process; organophosphate biosynthetic process; ribonucleoside monophosphate | intrinsic component of membrane; membrane; integral component of membrane; membrane part;                                                                                                                                                                                                                                                                                                                                                                                                                                                                                                                                                                                                                                                                                               | ATPase activity, coupled to transmembrane movement of ions; nucleoside phosphate binding; primary active transmembrane transporter activity; substrate-specific transporter activity; hydrolase activity, acting on acid anhydrides; hydrolase activity; substrate-specific transmembrane transporter activity; ATPase activity; organic cyclic compound binding; heterocyclic compound binding; metal ion transmembrane transporter activity; pyrophosphatase activity; cation-transporting ATPase activity; catalytic activity; ribonucleoside binding; ATPase activity, coupled to movement of substances; binding; purine ribonucleoside binding; cation binding; hydrolase activity, acting on acid anhydrides, catalyzing transmembrane movement of substances; anion binding; adenylyl ribonucleotide binding; adenylyl nucleotide binding; inorganic cation transmembrane transporter activity; hydrolase activity, acting on acid anhydrides, in phosphorus-containing anhydrides; transporter activity; purine nucleotide binding; purine ribonucleoside triphosphate binding; active transmembrane transporter activity; ATP binding; ion transmembrane transporter activity; ion binding; nucleoside binding; nucleotide binding; nucleoside-triphosphatase activity; ribonucleoside binding; P-P bond-hydrolysis-driven transmembrane transporter activity; ATPase activity, coupled to transmembrane movement of ions, phosphorylative mechanism; divalent inorganic cation transmembrane transporter activity; carbohydrate derivative binding; calcium-transporting ATPase activity; ATPase activity, coupled to transmembrane movement of substances; ATPase activity, coupled; metal ion binding; calcium ion transmembrane transporter activity; purine ribonucleoside binding; purine nucleoside binding; cation transmembrane transporter activity; transmembrane transporter activity; small molecule binding; |                                      | K05853                                             | ATP2A; Ca2+ transportin g ATPase, sarcoptis mic/endopl asmic reticulum [EC:3.6.3.8]                                                                                | dre04020 Calcium signaling pathway - Danio rerio (zebrafish); | P-type ATPase, transmembrane domain; Cation-transporting P-type ATPase, N-terminal; P-type ATPase, cytoplasmic domain N; P-type ATPase, A domain; Cation-transporting P-type ATPase, C-terminal; HAD-like domain; |



|        |        |                             |                     |      |   |                              |                 |                                                                                                                                                                                                                                                                                                                                                                                                                                                                                                                                                                                                                                                                                                                                                                                                                                                                                                                                                                                                                                                                                                                                                                                                                                                                      |                                                                                                                                                                                                                                                                                                                                                                                                                                                                                                                                                                                                                                                                                                                                                                                                                                                                                         |                                                                                                                                                                                                                                                                                                                                                                                                                                                                                                                                                                                                                                                                                                                                                                                                                                                                                                                                                                                                                                                                                                                                                                                                                                                                                                                                                                                                                                                                                                                                 |                                                                                                                                                                 |                                                                          |                                                                                                                                                                                                                            |
|--------|--------|-----------------------------|---------------------|------|---|------------------------------|-----------------|----------------------------------------------------------------------------------------------------------------------------------------------------------------------------------------------------------------------------------------------------------------------------------------------------------------------------------------------------------------------------------------------------------------------------------------------------------------------------------------------------------------------------------------------------------------------------------------------------------------------------------------------------------------------------------------------------------------------------------------------------------------------------------------------------------------------------------------------------------------------------------------------------------------------------------------------------------------------------------------------------------------------------------------------------------------------------------------------------------------------------------------------------------------------------------------------------------------------------------------------------------------------|-----------------------------------------------------------------------------------------------------------------------------------------------------------------------------------------------------------------------------------------------------------------------------------------------------------------------------------------------------------------------------------------------------------------------------------------------------------------------------------------------------------------------------------------------------------------------------------------------------------------------------------------------------------------------------------------------------------------------------------------------------------------------------------------------------------------------------------------------------------------------------------------|---------------------------------------------------------------------------------------------------------------------------------------------------------------------------------------------------------------------------------------------------------------------------------------------------------------------------------------------------------------------------------------------------------------------------------------------------------------------------------------------------------------------------------------------------------------------------------------------------------------------------------------------------------------------------------------------------------------------------------------------------------------------------------------------------------------------------------------------------------------------------------------------------------------------------------------------------------------------------------------------------------------------------------------------------------------------------------------------------------------------------------------------------------------------------------------------------------------------------------------------------------------------------------------------------------------------------------------------------------------------------------------------------------------------------------------------------------------------------------------------------------------------------------|-----------------------------------------------------------------------------------------------------------------------------------------------------------------|--------------------------------------------------------------------------|----------------------------------------------------------------------------------------------------------------------------------------------------------------------------------------------------------------------------|
| Q64220 | atp2a1 | Calcium-transporting ATPase | _APVGNK(cr)MFVK_    | 511  | 1 | SKAPVGNKMFVKGAP              | plasma membrane | <p>nucleoside metabolic process; purine nucleoside metabolic process; purine ribonucleoside monophosphate metabolic process; nucleotide metabolic process; single-organism process; purine ribonucleoside biosynthetic process; nucleoside biosynthetic process; biosynthetic process; ribonucleoside monophosphate biosynthetic process; cellular metabolic process; phosphate-containing compound metabolic process; ribose phosphate biosynthetic process; metabolic process; carbohydrate derivative biosynthetic process; nucleoside phosphate metabolic process; ribose phosphate metabolic process; purine nucleoside triphosphate biosynthetic process; heterocycle biosynthetic process; purine ribonucleoside triphosphate biosynthetic process; small molecule metabolic process; ATP biosynthetic process; single-organism cellular process; purine ribonucleoside triphosphate metabolic process; organic cyclic compound metabolic process; purine-containing compound metabolic process; ribonucleoside triphosphate metabolic process; purine ribonucleoside monophosphate biosynthetic process; purine nucleoside biosynthetic process; organophosphate biosynthetic process; ribonucleoside triphosphate</p>                                       | <p>intrinsic component of membrane; membrane; integral component of membrane; membrane part;</p>                                                                                                                                                                                                                                                                                                                                                                                                                                                                                                                                                                                                                                                                                                                                                                                        | <p>ATPase activity, coupled to transmembrane movement of ions; nucleoside phosphate binding; primary active transmembrane transporter activity; substrate-specific transporter activity; hydrolase activity, acting on acid anhydrides; hydrolase activity, acting on acid anhydrides; catalyzing transmembrane movement of substances; anion binding; adenylyl ribonucleotide binding; adenylyl nucleotide binding; inorganic cation transmembrane transporter activity; hydrolase activity, acting on acid anhydrides, in phosphorus-containing anhydrides; transporter activity; purine nucleotide binding; purine ribonucleoside triphosphate binding; active transmembrane transporter activity; ATP binding; ion transmembrane transporter activity; ion binding; nucleoside binding; nucleoside binding; nucleoside-triphosphatase activity; ribonucleoside binding; P-P-bond-hydrolysis-driven transmembrane transporter activity; ATPase activity, coupled to transmembrane movement of ions, phosphorylative mechanism; divalent inorganic cation transmembrane transporter activity; carbohydrate derivative binding; calcium-transporting ATPase activity; ATPase activity, coupled to transmembrane movement of substances; ATPase activity, coupled, metal ion binding; calcium ion transmembrane transporter activity; purine ribonucleoside binding; purine nucleoside binding; cation transmembrane transporter activity; transmembrane transporter activity; small molecule binding;</p>                      | <p>K05853</p> <p>ATP2A; Ca2+ transportin g ATPase, sarcoplasmic reticulum [EC:3.6.3.8]</p> <p>dre04020 Calcium signaling pathway - Danio rerio (zebrafish);</p> | <p>IPR023298; IPR004014; IPR023299; IPR006250; IPR006068; IPR023214;</p> | <p>P-type ATPase, transmembrane domain; Cation-transporting P-type ATPase, N-terminal; P-type ATPase, transmembrane domain N; P-type ATPase, A domain; Cation-transporting P-type ATPase, C-terminal; HAD-like domain;</p> |
| Q5U344 | atp2a1 | Calcium-transporting ATPase | _APVGNK(cr)MFVK_    | 511  | 1 | SKAPVGNKMFVKGAP              | plasma membrane | <p>regulation of biological quality; nucleoside metabolic process; purine nucleoside metabolic process; cellular divalent inorganic cation homeostasis; purine ribonucleoside monophosphate metabolic process; nucleotide metabolic process; positive regulation of muscle contraction; negative regulation of multicellular organismal process; single-organism process; purine ribonucleoside biosynthetic process; nucleoside biosynthetic process; ribonucleoside monophosphate biosynthetic process; cellular metabolic process; phosphate-containing compound metabolic process; response to external stimulus; ribose phosphate biosynthetic process; metabolic process; carbohydrate derivative biosynthetic process; positive regulation of multicellular organismal process; nucleoside phosphate metabolic process; regulation of skeletal muscle contraction; metal ion homeostasis; regulation of system process; ribose phosphate metabolic process; purine nucleoside triphosphate biosynthetic process; heterocycle biosynthetic process; purine ribonucleoside triphosphate biosynthetic process; ion homeostasis; small molecule metabolic process; negative regulation of striated muscle contraction; ionotropic ion</p>                         | <p>membrane; endoplasmic reticulum; nuclear outer membrane-endoplasmic reticulum membrane network; organelle membrane; myofibril; cytoplasm; intrinsic component of membrane; intracellular part; sarcoplasm; cell; I band; organelle part; non-membrane-bounded organelle; intracellular; cell part; membrane part; contractile fiber; membrane region; perinuclear region of cytoplasm; membrane-bounded organelle; endoplasmic reticulum membrane; intracellular organelle; bounding membrane of organelle; intracellular non-membrane-bounded organelle; H zone; intracellular organelle part; sarcoplasmic reticulum; endomembrane system; integral component of membrane; organelle; intracellular membrane-bounded organelle; endoplasmic reticulum part; endoplasmic reticulum-Golgi intermediate compartment; A band; sarcomere; contractile fiber part; cytoplasmic part;</p> | <p>ATPase activity, coupled to transmembrane movement of ions; nucleoside phosphate binding; primary active transmembrane transporter activity; substrate-specific transporter activity; hydrolase activity, acting on acid anhydrides; hydrolase activity, acting on acid anhydrides; catalyzing transmembrane movement of substances; anion binding; adenylyl ribonucleotide binding; adenylyl nucleotide binding; inorganic cation transmembrane transporter activity; hydrolase activity, acting on acid anhydrides, in phosphorus-containing anhydrides; transporter activity; purine nucleotide binding; purine ribonucleoside triphosphate binding; active transmembrane transporter activity; ATP binding; ion transmembrane transporter activity; ion binding; nucleoside binding; nucleoside binding; nucleoside-triphosphatase activity; ribonucleoside binding; P-P-bond-hydrolysis-driven transmembrane transporter activity; ATPase activity, coupled to transmembrane movement of ions, phosphorylative mechanism; divalent inorganic cation transmembrane transporter activity; carbohydrate derivative binding; calcium-transporting ATPase activity; ATPase activity, coupled to transmembrane movement of substances; ATPase activity, coupled, calcium ion transmembrane transporter activity; metal ion binding; purine ribonucleoside binding; purine nucleoside binding; calcium ion binding; cation transmembrane transporter activity; transmembrane transporter activity; small molecule binding;</p> | <p>K05853</p> <p>ATP2A; Ca2+ transportin g ATPase, sarcoplasmic reticulum [EC:3.6.3.8]</p> <p>dre04020 Calcium signaling pathway - Danio rerio (zebrafish);</p> | <p>IPR004014; IPR023298; IPR008250; IPR023299; IPR006068; IPR023214;</p> | <p>Cation-transporting P-type ATPase, N-terminal; P-type ATPase, transmembrane domain; P-type ATPase, A domain; P-type ATPase, C-terminal; HAD-like domain;</p>                                                            |
| F1QIR4 |        | Uncharacterized protein     | _AQLFNQVK(cr)ADIER_ | 1572 | 1 | QLEFNQVKADIERKL...E...K..... | cytosol         | <p>cellular component biogenesis; muscle cell development; single-multicellular organism process; cellular component organization; muscle system process; cellular developmental process; cellular component morphogenesis; single-organism process; actin filament organization; cell development; anatomical structure morphogenesis; cell differentiation; actin cytoskeleton organization; muscle contraction; cellular component assembly; organelle assembly; macromolecular complex assembly; myofibril assembly; musculoskeletal movement; slow-twitch skeletal muscle fiber contraction; muscle structure development; cytoskeleton organization; anatomical structure morphogenesis; cell development; cellular process; striated muscle myosin thick filament assembly; protein complex assembly; cellular protein complex assembly; skeletal muscle thin filament assembly; developmental process; cellular macromolecular complex assembly; striated muscle cell differentiation; actomyosin structure organization; system process; protein complex subunit organization; multicellular organismal movement; single-organism cellular process; cellular component assembly involved in morphogenesis; striated muscle contraction; myosin filament</p> | <p>intracellular organelle; intracellular non-membrane-bounded organelle; cytoskeleton; intracellular organelle part; macromolecular complex; intracellular part; cell; actin cytoskeleton; organelle part; non-membrane-bounded organelle; organelle; cytoskeleton; cell part; intracellular; myosin complex; protein complex;</p>                                                                                                                                                                                                                                                                                                                                                                                                                                                                                                                                                     | <p>ATP binding; motor activity; nucleoside phosphate binding; nucleoside binding; ion binding; hydrolase activity, acting on acid anhydrides; hydrolase activity, acting on acid anhydrides; nucleoside binding; nucleoside-triphosphatase activity; organic cyclic compound binding; heterocyclic compound binding; nucleoside binding; pyrophosphatase activity; catalytic activity; ribonucleotide binding; binding; purine ribonucleoside binding; anion binding; purine ribonucleotide binding; adenylyl ribonucleotide binding; adenylyl nucleotide binding; purine nucleoside binding; hydrolase activity, acting on acid anhydrides, in phosphorus-containing anhydrides; purine nucleotide binding; small molecule binding; purine ribonucleoside triphosphate binding;</p>                                                                                                                                                                                                                                                                                                                                                                                                                                                                                                                                                                                                                                                                                                                                            | <p>K10352</p> <p>MYH; myosin heavy chain</p> <p>dre04530 Tight junction - Danio rerio (zebrafish);</p>                                                          | <p>IPR002928; IPR004009; IPR027417; IPR001609; IPR027401;</p>            | <p>Myosin tail; Myosin, N-terminal, SH3-like; P-loop containing nucleoside triphosphate hydrolase; Myosin head, motor domain; Myosin-like IQ motif-containing domain;</p>                                                  |

|        |       |                                            |                              |      |   |                 |               |              |                                                                                                                                                                                                                                                                                                                                                                                                                                                                                                                                                                                                                                                                                                                                                                                                                                                                                                                                                                                                                                                                                                                                                                                                                                                                                                                                                                                                                                                                                                                                                                                                    |                                                                                                                                                                                                                                                                                                                                 |        |                                                                                                                                                                                                                                                                                                                                                                                                                                                                                                                                                                                |                                                                                         |
|--------|-------|--------------------------------------------|------------------------------|------|---|-----------------|---------------|--------------|----------------------------------------------------------------------------------------------------------------------------------------------------------------------------------------------------------------------------------------------------------------------------------------------------------------------------------------------------------------------------------------------------------------------------------------------------------------------------------------------------------------------------------------------------------------------------------------------------------------------------------------------------------------------------------------------------------------------------------------------------------------------------------------------------------------------------------------------------------------------------------------------------------------------------------------------------------------------------------------------------------------------------------------------------------------------------------------------------------------------------------------------------------------------------------------------------------------------------------------------------------------------------------------------------------------------------------------------------------------------------------------------------------------------------------------------------------------------------------------------------------------------------------------------------------------------------------------------------|---------------------------------------------------------------------------------------------------------------------------------------------------------------------------------------------------------------------------------------------------------------------------------------------------------------------------------|--------|--------------------------------------------------------------------------------------------------------------------------------------------------------------------------------------------------------------------------------------------------------------------------------------------------------------------------------------------------------------------------------------------------------------------------------------------------------------------------------------------------------------------------------------------------------------------------------|-----------------------------------------------------------------------------------------|
| E9QB1  | ctcb  | Clathrin heavy chain                       | _AQLQK(cr)GLVK_              | 1118 | 1 | LAKAQLQKGLVKEAI | .....K.L..... | cytosol      | <p>establishment of protein localization; transport; intracellular transport; cellular macromolecule localization; establishment of localization in cell; vesicle-mediated transport; intracellular protein transport; organic substance transport; protein localization; macromolecule localization; cellular protein localization; localization; protein transport; establishment of localization; cellular localization;</p> <p>transport vesicle membrane; membrane; clathrin coat of trans-Golgi network vesicle; cytoplasmic vesicle; organelle membrane; membrane-bounded vesicle; cell periphery; cytoplasmic membrane-bounded vesicle; vesicle; Golgi-associated vesicle membrane; cytoplasm; cytoplasmic vesicle part; macromolecular complex; intracellular part; vesicle coat; cell; organelle part; coated vesicle membrane; trans-Golgi network transport vesicle; clathrin-coated vesicle; membrane part; cell part; intracellular; Golgi apparatus part; trans-Golgi network transport vesicle membrane; clathrin coat of coated pit; membrane-bounded organelle; intracellular organelle; bounding membrane of organelle; coated membrane; intracellular organelle part; Golgi membrane; vesicle membrane; endomembrane system; coated vesicle; clathrin-coated vesicle membrane; Golgi-associated vesicle; plasma membrane; cytoplasmic vesicle membrane; intracellular membrane-bounded organelle; organelle; clathrin vesicle coat; plasma membrane part; clathrin coat; membrane coat; Golgi apparatus; transport vesicle; coated pit; protein complex; cytoplasmic part;</p> | structural molecule activity;                                                                                                                                                                                                                                                                                                   | K04846 | <p>CLTC; clathrin heavy chain</p> <p>dre04144 Endocytosis - Danio rerio (zebrafish); dre04142 Lysosome - Danio rerio (zebrafish);</p> <p>IPR016025; IPR015348; IPR011990; IPR016024; IPR001473; Clathrin, heavy chain, linker/propeller domain; Clathrin, heavy chain, linker, core motif; Tetraatricopeptide-like helical domain; Armadillo-type fold; Clathrin, heavy chain, propeller, N-terminal;</p>                                                                                                                                                                      |                                                                                         |
| Q6P3J5 | eef2b | Eukaryotic translation elongation factor 2 | _ARFPFDGLAEDIK(cr)GDVSSR_    | 619  | 1 | GLAEDIKGDVSSRQ  | .....DK.....  | cytosol      | <p>nucleoside phosphate binding; translation elongation factor activity; hydrolase activity, acting on acid anhydrides; hydrolase activity; organic cyclic compound binding; heterocyclic compound binding; pyrophosphatase activity; catalytic activity; ribonucleotide binding; binding; GTPase activity; purine ribonucleoside binding; anion binding; hydrolase activity, acting on acid anhydrides, in phosphorus-containing anhydrides; guanyl nucleotide binding; GTP binding; purine nucleotide binding; purine ribonucleoside triphosphate binding; RNA binding; ion binding; nucleoside binding; nucleoside binding; nucleoside-triphosphatase activity; ribonucleoside binding; translation factor activity, nucleic acid binding; carbohydrate derivative binding; nucleic acid binding; purine ribonucleoside binding; guanyl ribonucleotide binding; purine nucleoside binding; small molecule binding;</p>                                                                                                                                                                                                                                                                                                                                                                                                                                                                                                                                                                                                                                                                          |                                                                                                                                                                                                                                                                                                                                 | K03234 | <p>IPR027417; IPR000795; IPR005517; IPR005225; IPR0004161; IPR000640; IPR020568; IPR014721; IPR008022; IPR009000; P-loop containing nucleoside triphosphate hydrolase; Elongation factor, GTP-binding domain; Translation elongation factor EFG/EF2, domain IV; Small GTP-binding protein domain; Translation elongation factor EFTu/EFT1A, domain 2; Translation elongation factor EFG, V domain; Ribosomal protein S5 domain 2-type fold; Ribosomal protein S5 domain 2-type fold, subgroup; Elongation factor G, III-V domain; Translation protein, beta-barrel domain;</p> |                                                                                         |
| AZBGU3 | nono  | Uncharacterized protein                    | _ASEFINK(cr)DR_              | 105  | 1 | ASEFINKDRGFGFI  | ..E...K.....  | cytosol      | <p>organic cyclic compound binding; heterocyclic compound binding; nucleoside phosphate binding; binding; nucleic acid binding; nucleoside binding; small molecule binding;</p>                                                                                                                                                                                                                                                                                                                                                                                                                                                                                                                                                                                                                                                                                                                                                                                                                                                                                                                                                                                                                                                                                                                                                                                                                                                                                                                                                                                                                    |                                                                                                                                                                                                                                                                                                                                 |        | <p>IPR012975; IPR000504; IPR012677; RUPS; RNA recognition motif domain; Nucleotide-binding, alpha-</p>                                                                                                                                                                                                                                                                                                                                                                                                                                                                         |                                                                                         |
| F1QK60 | ktf4  | Uncharacterized protein                    | _ASVENEFVLLK(cr)K_           | 220  | 1 | ENEFVLLKDVDAAY  | ..E...K.....  | nuclear      | <p>intracellular organelle; intracellular non-membrane-bounded organelle; cytoskeletal part; intracellular organelle part; macromolecular complex; intracellular part; cell; keratin filament; organelle part; non-membrane-bounded organelle; organelle; cytoskeleton; intermediate filament; cytoskeleton; cell part; intracellular; intermediate filament; protein complex;</p>                                                                                                                                                                                                                                                                                                                                                                                                                                                                                                                                                                                                                                                                                                                                                                                                                                                                                                                                                                                                                                                                                                                                                                                                                 | structural molecule activity;                                                                                                                                                                                                                                                                                                   | K07605 |                                                                                                                                                                                                                                                                                                                                                                                                                                                                                                                                                                                |                                                                                         |
| P13104 | tpma  | Tropomyosin alpha-1 chain                  | _ATEDELK(cr)YSEALK_          | 59   | 1 | ATEDELKYSEALKD  | .....DK.....  | cytosol      | <p>cytoskeleton; organelle; intracellular organelle; intracellular non-membrane-bounded organelle; cell part; intracellular; cytoplasm; intracellular part; cell; non-membrane-bounded organelle;</p>                                                                                                                                                                                                                                                                                                                                                                                                                                                                                                                                                                                                                                                                                                                                                                                                                                                                                                                                                                                                                                                                                                                                                                                                                                                                                                                                                                                              |                                                                                                                                                                                                                                                                                                                                 | K10373 | <p>dre04261; contraction - Danio rerio (zebrafish); dre04261 Adrenergic signaling in cardiomyocytes - Danio rerio</p>                                                                                                                                                                                                                                                                                                                                                                                                                                                          |                                                                                         |
| P13104 | tpma  | Tropomyosin alpha-1 chain                  | _ATEDELKYSEALK(cr)DAQEK_     | 65   | 1 | DKYSEALKDAQEKLE |               | cytosol      | <p>cytoskeleton; organelle; intracellular organelle; intracellular non-membrane-bounded organelle; cell part; intracellular; cytoplasm; intracellular part; cell; non-membrane-bounded organelle;</p>                                                                                                                                                                                                                                                                                                                                                                                                                                                                                                                                                                                                                                                                                                                                                                                                                                                                                                                                                                                                                                                                                                                                                                                                                                                                                                                                                                                              |                                                                                                                                                                                                                                                                                                                                 | K10373 | <p>dre04261; contraction - Danio rerio (zebrafish); dre04261 Adrenergic signaling in cardiomyocytes - Danio rerio</p>                                                                                                                                                                                                                                                                                                                                                                                                                                                          |                                                                                         |
| Q93548 | bE1   | Embryonic 1 beta-globin                    | _ATIQDIFAK(cr)ADYDVIGPQALAR_ | 18   | 1 | TIQDIFAKADYDVIG |               | cytosol      | <p>cell part; intracellular; hemoglobin complex; cytoplasm; macromolecular complex; intracellular part; cytosolic part; protein complex; cell; cytosol; cytoplasmic part;</p>                                                                                                                                                                                                                                                                                                                                                                                                                                                                                                                                                                                                                                                                                                                                                                                                                                                                                                                                                                                                                                                                                                                                                                                                                                                                                                                                                                                                                      | <p>organic cyclic compound binding; heterocyclic compound binding; heme binding; iron ion binding; transition metal ion binding; oxygen binding; binding; ion binding; substrate-specific transporter activity; metal ion binding; cation binding; oxygen transporter activity; tetrapyrrole binding; transporter activity;</p> |        |                                                                                                                                                                                                                                                                                                                                                                                                                                                                                                                                                                                | <p>IPR009050; IPR000971; IPR012292; Globin-like; Globin; Globin, structural domain;</p> |
| E9QDY3 | oyt1  | Uncharacterized protein                    | _ATTETK(cr)TT_               | 448  | 1 | SKATTETKTT_____ |               | mitochondria | <p>intracellular organelle; intracellular non-membrane-bounded organelle; cytoskeletal part; intracellular organelle part; macromolecular complex; intracellular part; cell; organelle part; non-membrane-bounded organelle; organelle; cytoskeleton; intermediate filament cytoskeleton; cell part; intracellular; intermediate filament; protein complex;</p>                                                                                                                                                                                                                                                                                                                                                                                                                                                                                                                                                                                                                                                                                                                                                                                                                                                                                                                                                                                                                                                                                                                                                                                                                                    | structural molecule activity;                                                                                                                                                                                                                                                                                                   | K07604 |                                                                                                                                                                                                                                                                                                                                                                                                                                                                                                                                                                                |                                                                                         |

|        |          |                                    |                                 |      |   |                 |               |                 |                                                                                                                                                                                                                                                                                                                                                                                                                                                                                                                                                                                                                                                                                                                                                                  |                                                                                                                                                                                                                                                                                                                                   |                                                                                                                                                                                                                                                                                                                                                                                                                                                                                                                                                                                                                                                                                                                                                                                                                                                                                                                                                                                                                                                                                                                                                                                                                                                                                                                                                                                                                                                                                                                                                                                                                                                                                                                                                                                                                                                                                                                                      |        |                                             |                                                                                                                                                                                                                                                                                                   |                                                                                                                                    |                                                                                              |                                                                                                                                                                                                                   |
|--------|----------|------------------------------------|---------------------------------|------|---|-----------------|---------------|-----------------|------------------------------------------------------------------------------------------------------------------------------------------------------------------------------------------------------------------------------------------------------------------------------------------------------------------------------------------------------------------------------------------------------------------------------------------------------------------------------------------------------------------------------------------------------------------------------------------------------------------------------------------------------------------------------------------------------------------------------------------------------------------|-----------------------------------------------------------------------------------------------------------------------------------------------------------------------------------------------------------------------------------------------------------------------------------------------------------------------------------|--------------------------------------------------------------------------------------------------------------------------------------------------------------------------------------------------------------------------------------------------------------------------------------------------------------------------------------------------------------------------------------------------------------------------------------------------------------------------------------------------------------------------------------------------------------------------------------------------------------------------------------------------------------------------------------------------------------------------------------------------------------------------------------------------------------------------------------------------------------------------------------------------------------------------------------------------------------------------------------------------------------------------------------------------------------------------------------------------------------------------------------------------------------------------------------------------------------------------------------------------------------------------------------------------------------------------------------------------------------------------------------------------------------------------------------------------------------------------------------------------------------------------------------------------------------------------------------------------------------------------------------------------------------------------------------------------------------------------------------------------------------------------------------------------------------------------------------------------------------------------------------------------------------------------------------|--------|---------------------------------------------|---------------------------------------------------------------------------------------------------------------------------------------------------------------------------------------------------------------------------------------------------------------------------------------------------|------------------------------------------------------------------------------------------------------------------------------------|----------------------------------------------------------------------------------------------|-------------------------------------------------------------------------------------------------------------------------------------------------------------------------------------------------------------------|
| B7ZD32 | rps24    | 40S ribosomal protein S24          | _ATVPK(cr)TEIR_                 | 25   | 1 | PGKATVPKTEIREKL | .....K.E..... | cytosol         | cellular protein metabolic process; biosynthetic process; primary metabolic process; cellular metabolic process; organic substance biosynthetic process; cellular biosynthetic process; organic substance metabolic process; metabolic process; cellular macromolecule biosynthetic process; cellular macromolecule metabolic process; gene expression; macromolecule metabolic process; protein metabolic process; macromolecule biosynthetic process; translation; cellular process;                                                                                                                                                                                                                                                                           | ribosome; organelle; intracellular organelle; intracellular non-membrane-bounded organelle; cell part; intracellular; cytoplasm; macromolecular complex; intracellular part; cell; ribonucleoprotein complex; cytoplasmic part; non-membrane-bounded organelle;                                                                   | organic cyclic compound binding; heterocyclic compound binding; nucleoside phosphate binding; nucleotide binding; structural molecule activity; structural constituent of ribosome; small molecule binding;                                                                                                                                                                                                                                                                                                                                                                                                                                                                                                                                                                                                                                                                                                                                                                                                                                                                                                                                                                                                                                                                                                                                                                                                                                                                                                                                                                                                                                                                                                                                                                                                                                                                                                                          |        |                                             | IPR012678; IPR012677;                                                                                                                                                                                                                                                                             | Ribosomal protein L23L15e core domain; Nucleotide-binding, alpha-beta plot;                                                        |                                                                                              |                                                                                                                                                                                                                   |
| Q6PB85 | rps25    | 40S ribosomal protein S25          | _ATYDK(cr)LYK_                  | 56   | 1 | FDKATYDKLYKEVPN | .....DK.....  | nuclear         |                                                                                                                                                                                                                                                                                                                                                                                                                                                                                                                                                                                                                                                                                                                                                                  | ribosome; organelle; intracellular organelle; intracellular non-membrane-bounded organelle; cell part; intracellular; cytoplasm; macromolecular complex; intracellular part; cell; ribonucleoprotein complex; cytoplasmic part; non-membrane-bounded organelle;                                                                   |                                                                                                                                                                                                                                                                                                                                                                                                                                                                                                                                                                                                                                                                                                                                                                                                                                                                                                                                                                                                                                                                                                                                                                                                                                                                                                                                                                                                                                                                                                                                                                                                                                                                                                                                                                                                                                                                                                                                      | K02975 | RP-S25; small subunit ribosomal protein S25 | dre03010 Ribosome - Danio rerio (zebrafish);                                                                                                                                                                                                                                                      |                                                                                                                                    |                                                                                              |                                                                                                                                                                                                                   |
| Q6TH14 |          | Enolase                            | _AVDHNK(cr)DIAPK_               | 71   | 1 | KAVDHNKDIAPKLI  | .....K.L..... | mitochondrion   | single-organism carbohydrate catabolic process; glycolytic process; single-organism catabolic process; small molecule metabolic process; single-organism cellular process; single-organism process; carbohydrate metabolic process; primary metabolic process; cellular metabolic process; organic substance metabolic process; carbohydrate catabolic process; single-organism carbohydrate metabolic process; organic substance catabolic process; metabolic process; pyruvate metabolic process; generation of precursor metabolites and energy; single-organism metabolic process; carboxylic acid metabolic process; monocarboxylic acid metabolic process; organic acid metabolic process; cellular process; catabolic process; oxoacid metabolic process; | catalytic complex; cell part; intracellular; cytoplasm; macromolecular complex; intracellular part; cytosolic part; cell; cytosol; protein complex; phosphopyruvate hydratase complex; cytoplasmic part;                                                                                                                          | magnesium ion binding; phosphopyruvate hydratase activity; catalytic activity; binding; ion binding; metal ion binding; cation binding; lyase activity; hydro-lyase activity; carbon-oxygen lyase activity;                                                                                                                                                                                                                                                                                                                                                                                                                                                                                                                                                                                                                                                                                                                                                                                                                                                                                                                                                                                                                                                                                                                                                                                                                                                                                                                                                                                                                                                                                                                                                                                                                                                                                                                          | K01689 | ENO; enolase [EC:4.2.1.11]                  | dre00010 Glycolysis / Gluconeogenesis - Danio rerio (zebrafish); dre01230 Biosynthesis of amino acids - Danio rerio (zebrafish); dre01200 Carbon metabolism - Danio rerio (zebrafish); dre01100 Metabolic pathways - Danio rerio (zebrafish); dre03018 RNA degradation - Danio rerio (zebrafish); | IPR029065; IPR029010; IPR029017; IPR029011;                                                                                        | Enolase C-terminal domain-like; Enolase C-terminal; Enolase domain-like; Enolase N-terminal; |                                                                                                                                                                                                                   |
| Q6P3L3 | hsp5a    | Heat shock protein 5               | _AVEEK(cr)IEWLEAHQDADLEEFQAK_   | 599  | 1 | IEKAVEEKIEWLEAH | .....K.E..... | extracellular   |                                                                                                                                                                                                                                                                                                                                                                                                                                                                                                                                                                                                                                                                                                                                                                  |                                                                                                                                                                                                                                                                                                                                   | ATP binding; nucleoside phosphate binding; nucleoside binding; ion binding; nucleotide binding; organic cyclic compound binding; heterocyclic compound binding; ribonucleoside binding; carbohydrate derivative binding; ribonucleotide binding; binding; purine ribonucleoside binding; anion binding; purine ribonucleotide binding; adenylyl ribonucleotide binding; adenylyl nucleotide binding; purine nucleoside binding; purine nucleotide binding; small molecule binding; purine ribonucleoside triphosphate binding;                                                                                                                                                                                                                                                                                                                                                                                                                                                                                                                                                                                                                                                                                                                                                                                                                                                                                                                                                                                                                                                                                                                                                                                                                                                                                                                                                                                                       |        | K09490                                      | HSPA5; heat shock 70kDa protein 5                                                                                                                                                                                                                                                                 | dre03060 Protein export - Danio rerio (zebrafish); dre04141 Protein processing in endoplasmic reticulum - Danio rerio (zebrafish); | IPR029048; IPR029047;                                                                        | Heat shock protein 70kD, C-terminal domain; Heat shock protein 70kD, peptide-binding domain;                                                                                                                      |
| B8A561 | myh2.1.2 | Uncharacterized protein            | _AVETEK(cr)AEIQTALAEAGTLEHEESK_ | 1539 | 1 | KKAVETEKAEIQTAL | .....K.E..... | nuclear         |                                                                                                                                                                                                                                                                                                                                                                                                                                                                                                                                                                                                                                                                                                                                                                  | intracellular organelle; intracellular non-membrane-bounded organelle; cytoskeleton part; intracellular organelle part; macromolecular complex; intracellular part; cell; actin cytoskeleton; organelle part; non-membrane-bounded organelle; organelle; cytoskeleton; cell part; intracellular; myosin complex; protein complex; | ATP binding; motor activity; nucleoside phosphate binding; nucleoside binding; ion binding; hydrolase activity, acting on acid anhydrides; hydrolase activity; nucleotide binding; nucleoside-triphosphate activity; organic cyclic compound binding; heterocyclic compound binding; ribonucleoside binding; carbohydrate derivative binding; pyrophosphatase activity; catalytic activity; ribonucleotide binding; binding; purine ribonucleoside binding; anion binding; purine ribonucleotide binding; adenylyl ribonucleotide binding; adenylyl nucleotide binding; purine nucleoside binding; hydrolase activity, acting on acid anhydrides, in phosphorus-containing anhydrides; purine nucleotide binding; small molecule binding; purine ribonucleoside triphosphate binding;                                                                                                                                                                                                                                                                                                                                                                                                                                                                                                                                                                                                                                                                                                                                                                                                                                                                                                                                                                                                                                                                                                                                                |        | K10352                                      | MYH; myosin heavy chain                                                                                                                                                                                                                                                                           | dre04530 Tight Junction - Danio rerio (zebrafish);                                                                                 | IPR002928; IPR004009; IPR001609; IPR027417; IPR027401;                                       | Myosin tail; Myosin N-terminal; SH4-like; Myosin head, motor domain; P-loop containing nucleoside triphosphate hydrolase; Myosin-like IQ motif-containing domain;                                                 |
| F1REG7 | oxc1a    | Uncharacterized protein (Fragment) | _AVFDVVK(cr)DK_                 | 75   | 1 | KAVFDVVKDKGLTLI | .....DK.....  | cytosol         |                                                                                                                                                                                                                                                                                                                                                                                                                                                                                                                                                                                                                                                                                                                                                                  |                                                                                                                                                                                                                                                                                                                                   | CoA-transferase activity; transferase activity, transferring sulfur-containing groups; catalytic activity; transferase activity;                                                                                                                                                                                                                                                                                                                                                                                                                                                                                                                                                                                                                                                                                                                                                                                                                                                                                                                                                                                                                                                                                                                                                                                                                                                                                                                                                                                                                                                                                                                                                                                                                                                                                                                                                                                                     |        |                                             |                                                                                                                                                                                                                                                                                                   |                                                                                                                                    |                                                                                              |                                                                                                                                                                                                                   |
| Q6NV37 | gyg1a    | Glycogenin 1                       | _AVLHK(cr)YDEVR_                | 53   | 1 | PSRAVLHKYDEVR   |               | cytosol         |                                                                                                                                                                                                                                                                                                                                                                                                                                                                                                                                                                                                                                                                                                                                                                  |                                                                                                                                                                                                                                                                                                                                   | transferase activity, transferring glycosyl groups; catalytic activity; transferase activity;                                                                                                                                                                                                                                                                                                                                                                                                                                                                                                                                                                                                                                                                                                                                                                                                                                                                                                                                                                                                                                                                                                                                                                                                                                                                                                                                                                                                                                                                                                                                                                                                                                                                                                                                                                                                                                        |        | K00750                                      |                                                                                                                                                                                                                                                                                                   | IPR029044;                                                                                                                         | Nucleotide-diphospho-sugar transferases;                                                     |                                                                                                                                                                                                                   |
| Q64220 | atp2a1   | Calcium-transporting ATPase        | _AVNGDK(cr)K_                   | 204  | 1 | PRAVNGDKKMLFSG  | .....DK.....  | plasma membrane |                                                                                                                                                                                                                                                                                                                                                                                                                                                                                                                                                                                                                                                                                                                                                                  | intrinsic component of membrane; membrane; integral component of membrane; membrane part;                                                                                                                                                                                                                                         | ATPase activity, coupled to transmembrane movement of ions; nucleoside phosphate binding; primary active transmembrane transporter activity; substrate-specific transporter activity; hydrolase activity, acting on acid anhydrides; hydrolase activity; substrate-specific transmembrane transporter activity; ATPase activity; organic cyclic compound binding; heterocyclic compound binding; metal ion transmembrane transporter activity; pyrophosphatase activity; cation-transporting ATPase activity; catalytic activity; ribonucleotide binding; ATPase activity, coupled to movement of substances; binding; purine ribonucleoside binding; cation binding; hydrolase activity, acting on acid anhydrides, catalyzing transmembrane movement of substances; anion binding; adenylyl ribonucleotide binding; adenylyl nucleotide binding; inorganic cation transmembrane transporter activity; hydrolase activity, acting on acid anhydrides, in phosphorus-containing anhydrides; transporter activity; purine nucleotide binding; purine ribonucleoside triphosphate binding; active transmembrane transporter activity; ATP binding; ion transmembrane transporter activity; ion binding; nucleoside binding; nucleotide binding; nucleoside-triphosphatase activity; ribonucleoside binding; P-P-bond-hydrolysis-driven transmembrane transporter activity; ATPase activity, coupled to transmembrane movement of ions, phosphorylative mechanism; divalent inorganic cation transmembrane transporter activity; carbohydrate derivative binding; calcium-transporting ATPase activity; ATPase activity, coupled to transmembrane movement of substances; ATPase activity, coupled, metal ion binding; calcium ion transmembrane transporter activity; purine ribonucleotide binding; purine nucleoside binding; cation transmembrane transporter activity; transmembrane transporter activity; small molecule binding; |        | K05853                                      | ATP2A; Ca2+ transporter g ATPase, sarcoplasmic microendoplasmic reticulum [EC:3.6.3.8]                                                                                                                                                                                                            | dre04020 Calcium signaling pathway - Danio rerio (zebrafish);                                                                      | IPR023298; IPR004014; IPR023299; IPR006250; IPR006068; IPR023214;                            | P-type ATPase, transmembrane domain; Cation-transporting P-type ATPase, N-terminal; P-type ATPase, cytoplasmic domain N; P-type ATPase, A domain; Cation-transporting P-type ATPase, C-terminal; HAD-like domain; |

|        |        |                                                                    |                     |       |   |                 |               |                 |                                                                                                                                                                                                                                                                                                                                                                                                                                                                                                                                                                                                                                                                                                                                                                                                                                                                                                                                                                                                                                                                                                                                                                                                                                                                                                                                                                                                                                                                                                                                                                                                                                                                                                                                                                                                                                                                                                                                                                                                                                                                                                                                                                                                                                                                                                                                                                                                                                                                      |                                                                                                                                                                                                                                                                                                                                                                                                                                                                                                                                                                                                                                                                                                                                                                                                                                                                                                                                                                                                                                                                                                                                                                                                                                                                                                                                                                                                                                                                                                                                                                                                                                                                                                                                                                                                                                                                                                |                                                                                     |                                                                                         |                                                                                                                                                                                                         |                                                                                  |                                                                                                                                                                                                                               |
|--------|--------|--------------------------------------------------------------------|---------------------|-------|---|-----------------|---------------|-----------------|----------------------------------------------------------------------------------------------------------------------------------------------------------------------------------------------------------------------------------------------------------------------------------------------------------------------------------------------------------------------------------------------------------------------------------------------------------------------------------------------------------------------------------------------------------------------------------------------------------------------------------------------------------------------------------------------------------------------------------------------------------------------------------------------------------------------------------------------------------------------------------------------------------------------------------------------------------------------------------------------------------------------------------------------------------------------------------------------------------------------------------------------------------------------------------------------------------------------------------------------------------------------------------------------------------------------------------------------------------------------------------------------------------------------------------------------------------------------------------------------------------------------------------------------------------------------------------------------------------------------------------------------------------------------------------------------------------------------------------------------------------------------------------------------------------------------------------------------------------------------------------------------------------------------------------------------------------------------------------------------------------------------------------------------------------------------------------------------------------------------------------------------------------------------------------------------------------------------------------------------------------------------------------------------------------------------------------------------------------------------------------------------------------------------------------------------------------------------|------------------------------------------------------------------------------------------------------------------------------------------------------------------------------------------------------------------------------------------------------------------------------------------------------------------------------------------------------------------------------------------------------------------------------------------------------------------------------------------------------------------------------------------------------------------------------------------------------------------------------------------------------------------------------------------------------------------------------------------------------------------------------------------------------------------------------------------------------------------------------------------------------------------------------------------------------------------------------------------------------------------------------------------------------------------------------------------------------------------------------------------------------------------------------------------------------------------------------------------------------------------------------------------------------------------------------------------------------------------------------------------------------------------------------------------------------------------------------------------------------------------------------------------------------------------------------------------------------------------------------------------------------------------------------------------------------------------------------------------------------------------------------------------------------------------------------------------------------------------------------------------------|-------------------------------------------------------------------------------------|-----------------------------------------------------------------------------------------|---------------------------------------------------------------------------------------------------------------------------------------------------------------------------------------------------------|----------------------------------------------------------------------------------|-------------------------------------------------------------------------------------------------------------------------------------------------------------------------------------------------------------------------------|
| Q5U344 | atp2a1 | Calcium-transporting ATPase                                        | _AVNGDK(cr)K_       | 204   | 1 | PRAVNGDKKMLFSG  | .....K.E..... | plasma membrane | regulation of biological quality; nucleoside metabolic process; purine nucleoside metabolic process; cellular divalent inorganic cation homeostasis; purine ribonucleoside monophosphate metabolic process; nucleotide metabolic process; positive regulation of muscle contraction; negative regulation of multicellular organismal process; single-organism process; purine ribonucleoside biosynthetic process; nucleoside biosynthetic process; biosynthetic process; ribonucleoside monophosphate biosynthetic process; cellular metabolic process; phosphate-containing compound metabolic process; response to external stimulus; ribose phosphate biosynthetic process; metabolic process; carbohydrate derivative biosynthetic process; positive regulation of multicellular organismal process; nucleoside phosphate metabolic process; regulation of skeletal muscle contraction; metal ion homeostasis; regulation of system process; ribose phosphate metabolic process; purine nucleoside triphosphate biosynthetic process; heterocycle biosynthetic process; purine ribonucleoside triphosphate biosynthetic process; ion homeostasis; calcium ion homeostasis; small molecule metabolic process; negative regulation of striated muscle contraction; nucleoside metabolic process; purine nucleoside metabolic process; purine ribonucleoside monophosphate metabolic process; nucleotide metabolic process; single-organism process; purine ribonucleoside biosynthetic process; nucleoside biosynthetic process; ribonucleoside monophosphate biosynthetic process; cellular metabolic process; phosphate-containing compound metabolic process; establishment of localization; ribose phosphate biosynthetic process; metabolic process; carbohydrate derivative biosynthetic process; nucleoside phosphate metabolic process; ribose phosphate metabolic process; purine nucleoside triphosphate biosynthetic process; single-organism transport; heterocycle biosynthetic process; cation transmembrane transport; purine ribonucleoside triphosphate biosynthetic process; small molecule metabolic process; ATP biosynthetic process; single-organism cellular process; purine ribonucleoside triphosphate metabolic process; organic cyclic compound metabolic process; purine-containing compound metabolic process; energy coupled proton transport, down electrochemical gradient; ribonucleoside triphosphate metabolic process; purine | ATPase activity, coupled to transmembrane movement of ions; nucleoside phosphate binding; primary active transmembrane transporter activity; substrate-specific transporter activity; hydrolase activity, acting on acid anhydrides; hydrolase activity; substrate-specific transmembrane transporter activity; ATPase activity; organic cyclic compound binding; heterocyclic compound binding; metal ion transmembrane transporter activity; pyrophosphatase activity; cation-transporting ATPase activity; catalytic activity; ribonucleotide binding; ATPase activity, coupled to movement of substances; binding; purine ribonucleoside binding; cation binding; hydrolyase activity, acting on acid anhydrides, catalyzing transmembrane movement of substances; anion binding; adenylyl ribonucleotide binding; adenylyl nucleotide binding; inorganic cation transmembrane transporter activity; hydrolase activity, acting on acid anhydrides, in phosphorus-containing anhydrides; transporter activity; purine nucleotide binding; purine ribonucleoside triphosphate binding; active transmembrane transporter activity; ATP binding; ion transmembrane transporter activity; ion binding; nucleoside binding; nucleoside binding; P-P-bond-hydrolysis-driven transmembrane transporter activity; ATPase activity, coupled to transmembrane movement of ions, phosphorylative mechanism; divalent inorganic cation transmembrane transporter activity; carbohydrate derivative binding; calcium-transporting ATPase activity; ATPase activity, coupled to transmembrane movement of substances; ATPase activity, coupled; calcium ion transmembrane transporter activity; metal ion binding; purine ribonucleoside binding; purine nucleoside binding; calcium ion binding; cation transmembrane transporter activity; transmembrane transporter activity; small molecule binding; | K05853                                                                              | ATP2A; Ca2+ transportin g ATPase, sarcoplasmic mic/endoplasmic reticulum [EC:3.6.3.8]   | dre04020 Calcium signaling pathway - Danio rerio (zebrafish);                                                                                                                                           | IPR004014; IPR023298; IPR008250; IPR023299; IPR006068; IPR023214;                | Cation-transporting P-type ATPase, N-terminal; P-type ATPase; transmembrane domain; P-type ATPase, A domain; P-type ATPase, C-terminal; cytoplasmic domain N; Cation-transporting P-type ATPase, C-terminal; HAD-like domain; |
| Q6PC77 | atp5h  | ATP synthase, H+ transporting, mitochondrial F0 complex, subunit d | _AVVAK(cr)AGM/DEFK_ | 63    | 1 | HYRAVVAKGM/DEF  | .....K.E..... | cytosol         | intracellular organelle, membrane; mitochondrial part; organelle membrane; organelle envelope; intracellular organelle part; cytoplasm; macromolecular complex; intracellular part; mitochondrial proton-transporting ATP synthase complex, coupling factor F(0); cell; mitochondrial membrane part; proton-transporting ATP synthase complex; mitochondrion; organelle part; intracellular membrane-bounded organelle; organelle; mitochondrial envelope; mitochondrial proton-transporting ATP synthase complex; membrane part; cell part; intracellular; proton-transporting two-sector ATPase complex; envelope; organelle inner membrane; proton-transporting ATP synthase complex, coupling factor F(0); protein complex; membrane-bounded organelle; mitochondrial inner membrane; proton-transporting two-sector ATPase complex; proton-transporting domain; mitochondrial membrane; cytoplasmic part;                                                                                                                                                                                                                                                                                                                                                                                                                                                                                                                                                                                                                                                                                                                                                                                                                                                                                                                                                                                                                                                                                                                                                                                                                                                                                                                                                                                                                                                                                                                                                       | ion transmembrane transporter activity; substrate-specific transporter activity; monovalent inorganic cation transmembrane transporter activity; inorganic cation transmembrane transporter activity; hydrogen ion transmembrane transporter activity; cation transmembrane transporter activity; substrate-specific transmembrane transporter activity; transporter activity; transmembrane transporter activity;                                                                                                                                                                                                                                                                                                                                                                                                                                                                                                                                                                                                                                                                                                                                                                                                                                                                                                                                                                                                                                                                                                                                                                                                                                                                                                                                                                                                                                                                             | K02138                                                                              | ATP5FD; F-type H+-transportin g ATPase subunit d                                        | dre01100 Metabolic pathways - Danio rerio (zebrafish); dre00190 Oxidative phosphorylation - Danio rerio (zebrafish);                                                                                    |                                                                                  |                                                                                                                                                                                                                               |
| G1K2X0 | tnfb   | Uncharacterized protein (Fragment)                                 | _AVHVEK(cr)R_       | 22276 | 1 | VKAYHVEKREASKKA | .....K.E..... |                 | ATP binding; nucleoside phosphate binding; phosphotransferase activity, alcohol group as acceptor; nucleoside binding; ion binding; protein tyrosine kinase activity; protein kinase activity; nucleotide binding; organic cyclic compound binding; heterocyclic compound binding; ribonucleoside binding; carbohydrate derivative binding; kinase activity; catalytic activity; ribonucleotide binding; binding; nucleic acid binding; purine ribonucleoside binding; anion binding; purine ribonucleotide binding; adenylyl ribonucleotide binding; adenylyl nucleotide binding; purine nucleoside binding; transferase activity; transferase activity, transferring phosphorus-containing groups; purine nucleotide binding; small molecule binding; purine ribonucleoside triphosphate binding;                                                                                                                                                                                                                                                                                                                                                                                                                                                                                                                                                                                                                                                                                                                                                                                                                                                                                                                                                                                                                                                                                                                                                                                                                                                                                                                                                                                                                                                                                                                                                                                                                                                                  | K12567                                                                                                                                                                                                                                                                                                                                                                                                                                                                                                                                                                                                                                                                                                                                                                                                                                                                                                                                                                                                                                                                                                                                                                                                                                                                                                                                                                                                                                                                                                                                                                                                                                                                                                                                                                                                                                                                                         |                                                                                     | IPR003598; IPR007110; IPR007119; IPR013783; IPR003599; IPR003961; IPR013098; IPR011009; | Immunoglobulin subtype 2; Immunoglobulin-like domain; Protein kinase domain; Immunoglobulin-like fold; Immunoglobulin subtype; Fibronectin, type III; Immunoglobulin I-set; Protein kinase-like domain; |                                                                                  |                                                                                                                                                                                                                               |
| Q6PSL2 | dbi    | Uncharacterized protein                                            | _AVYAK(cr)VEELK_    | 77    | 1 | AVKAYIAKVEELKGG | .....K.E..... | cytosol         | fatty-acyl-CoA binding; binding; ion binding; anion binding; cofactor binding; sulfur compound binding; coenzyme binding;                                                                                                                                                                                                                                                                                                                                                                                                                                                                                                                                                                                                                                                                                                                                                                                                                                                                                                                                                                                                                                                                                                                                                                                                                                                                                                                                                                                                                                                                                                                                                                                                                                                                                                                                                                                                                                                                                                                                                                                                                                                                                                                                                                                                                                                                                                                                            | K08762                                                                                                                                                                                                                                                                                                                                                                                                                                                                                                                                                                                                                                                                                                                                                                                                                                                                                                                                                                                                                                                                                                                                                                                                                                                                                                                                                                                                                                                                                                                                                                                                                                                                                                                                                                                                                                                                                         | DBI; diazepam-binding inhibitor (GABA receptor modulator; acyl-CoA-binding protein) | dre03220 PPAR signaling pathway - Danio rerio (zebrafish);                              | IPR000582; IPR014352;                                                                                                                                                                                   | Acyl-CoA-binding protein, ACBP; FERM/acyl-CoA-binding protein, 3-helical bundle; |                                                                                                                                                                                                                               |
| E9QJ96 | vwaha  | 14-3-3 protein beta/alpha-A                                        | AYQDAFEISK(cr)K     | 157   | 1 | QDAFEISKEMQPTH  | .....K.E..... | cytosol         | ATP binding; motor activity; nucleoside phosphate binding; nucleoside binding; ion binding; hydrolase activity, acting on acid anhydrides; hydrolase activity; nucleotide binding; nucleoside-triphosphatase activity; organic cyclic compound binding; heterocyclic compound binding; ribonucleoside binding; nucleic acid binding; purine ribonucleoside binding; anion binding; purine ribonucleotide binding; adenylyl ribonucleotide binding; adenylyl nucleotide binding; purine nucleoside binding; transferase activity; transferase activity, transferring phosphorus-containing groups; purine nucleotide binding; small molecule binding; purine ribonucleoside triphosphate binding;                                                                                                                                                                                                                                                                                                                                                                                                                                                                                                                                                                                                                                                                                                                                                                                                                                                                                                                                                                                                                                                                                                                                                                                                                                                                                                                                                                                                                                                                                                                                                                                                                                                                                                                                                                     |                                                                                                                                                                                                                                                                                                                                                                                                                                                                                                                                                                                                                                                                                                                                                                                                                                                                                                                                                                                                                                                                                                                                                                                                                                                                                                                                                                                                                                                                                                                                                                                                                                                                                                                                                                                                                                                                                                |                                                                                     | IPR023410;                                                                              | 14-3-3 domain;                                                                                                                                                                                          |                                                                                  |                                                                                                                                                                                                                               |
| B8A568 | myh2.1 | Uncharacterized protein                                            | _CASLKEK(cr)TK_     | 1418  | 1 | SKCASLETKQRLGG  | .....K.E..... | nuclear         | intracellular organelle; intracellular non-membrane-bounded organelle; cytoskeletal part; intracellular organelle part; macromolecular complex; intracellular part; cell; actin cytoskeleton; organelle part; non-membrane-bounded organelle; organelle cytoskeleton; cell part; intracellular; myosin complex; protein complex;                                                                                                                                                                                                                                                                                                                                                                                                                                                                                                                                                                                                                                                                                                                                                                                                                                                                                                                                                                                                                                                                                                                                                                                                                                                                                                                                                                                                                                                                                                                                                                                                                                                                                                                                                                                                                                                                                                                                                                                                                                                                                                                                     | ATP binding; motor activity; nucleoside phosphate binding; nucleoside binding; ion binding; hydrolase activity, acting on acid anhydrides; hydrolase activity; nucleotide binding; nucleoside-triphosphatase activity; organic cyclic compound binding; heterocyclic compound binding; ribonucleoside binding; carbohydrate derivative binding; pyrophosphatase activity; catalytic activity; ribonucleotide binding; binding; purine nucleic acid binding; purine ribonucleoside binding; anion binding; purine ribonucleotide binding; adenylyl ribonucleotide binding; adenylyl nucleotide binding; purine nucleoside binding; hydrolase activity, acting on acid anhydrides, in phosphorus-containing anhydrides; purine nucleotide binding; small molecule binding; purine ribonucleoside triphosphate binding;                                                                                                                                                                                                                                                                                                                                                                                                                                                                                                                                                                                                                                                                                                                                                                                                                                                                                                                                                                                                                                                                           | K10352                                                                              | MYH; myosin heavy chain                                                                 | dre04530 Tight junction - Danio rerio (zebrafish);                                                                                                                                                      | IPR002928; IPR004009; IPR001609; IPR027417; IPR027401;                           | Myosin tail; Myosin, N-terminal, SH3-like; Myosin head; motor domain; P-loop containing nucleoside triphosphate hydrolase; Myosin-like IQ motif-containing domain;                                                            |

|        |         |                                                   |                              |      |   |                               |         |                                                                                                                                                                                                                                                                                                                                                                                                                                                                                                                                                                                                                                                                                                                                                                                                                                                                                                                                                                                                                                                                                                                                                                                                                                                                                |                                                                                                                                                                                                                                                                                                                                                                                                                                                                                                                                                                                                                                                                                                                                                                                                                               |                                                                                                                                                                                                                                                                                                                                                                                                                                                                                                                                                                                                                                                                                                                                                                                         |                                                   |                                                                                                                                           |                                                               |                                                                                                                                                                    |                                                                                                                                                                    |
|--------|---------|---------------------------------------------------|------------------------------|------|---|-------------------------------|---------|--------------------------------------------------------------------------------------------------------------------------------------------------------------------------------------------------------------------------------------------------------------------------------------------------------------------------------------------------------------------------------------------------------------------------------------------------------------------------------------------------------------------------------------------------------------------------------------------------------------------------------------------------------------------------------------------------------------------------------------------------------------------------------------------------------------------------------------------------------------------------------------------------------------------------------------------------------------------------------------------------------------------------------------------------------------------------------------------------------------------------------------------------------------------------------------------------------------------------------------------------------------------------------|-------------------------------------------------------------------------------------------------------------------------------------------------------------------------------------------------------------------------------------------------------------------------------------------------------------------------------------------------------------------------------------------------------------------------------------------------------------------------------------------------------------------------------------------------------------------------------------------------------------------------------------------------------------------------------------------------------------------------------------------------------------------------------------------------------------------------------|-----------------------------------------------------------------------------------------------------------------------------------------------------------------------------------------------------------------------------------------------------------------------------------------------------------------------------------------------------------------------------------------------------------------------------------------------------------------------------------------------------------------------------------------------------------------------------------------------------------------------------------------------------------------------------------------------------------------------------------------------------------------------------------------|---------------------------------------------------|-------------------------------------------------------------------------------------------------------------------------------------------|---------------------------------------------------------------|--------------------------------------------------------------------------------------------------------------------------------------------------------------------|--------------------------------------------------------------------------------------------------------------------------------------------------------------------|
| B8A561 | myhz1.2 | Uncharacterized protein                           | _CASLEK(cr)TK_               | 1418 | 1 | SKCASLEKTKQRLQG               | nuclear | intracellular organelle; intracellular non-membrane-bounded organelle; cytoskeleton part; intracellular organelle part; macromolecular complex; intracellular part; cell; actin cytoskeleton; organelle part; non-membrane-bounded organelle; organelle; cytoskeleton; cell part; intracellular; myosin complex; protein complex;                                                                                                                                                                                                                                                                                                                                                                                                                                                                                                                                                                                                                                                                                                                                                                                                                                                                                                                                              | ATP binding; motor activity; nucleoside phosphate binding; nucleoside binding; ion binding; hydrolase activity, acting on acid anhydrides; hydrolase activity; nucleotide binding; nucleoside-triphosphatase activity; organic cyclic compound binding; heterocyclic compound binding; ribonucleoside binding; carbohydrate derivative binding; pyrophosphatase activity; catalytic activity; ribonucleotide binding; binding; purine ribonucleoside binding; anion binding; purine ribonucleotide binding; adenylyl ribonucleotide binding; adenylyl nucleotide binding; purine nucleoside binding; hydrolase activity, acting on acid anhydrides, in phosphorus-containing anhydrides; purine nucleotide binding; small molecule binding; purine ribonucleoside triphosphate binding;                                       | K10352                                                                                                                                                                                                                                                                                                                                                                                                                                                                                                                                                                                                                                                                                                                                                                                  | MYH; myosin heavy chain                           | dre04530 Tight junction - Danio rerio (zebrafish);                                                                                        | IPR002928; IPR004009; IPR001609; IPR027417; IPR027401;        | Myosin tail; Myosin, N-terminal, SH3-like; Myosin head, motor domain; P-loop containing nucleoside triphosphate hydrolase; Myosin-like IQ motif-containing domain; |                                                                                                                                                                    |
| Q68E2  | ak1     | Adenylylate kinase isoenzyme 1                    | _DAMIAC(cr)ADVSK_            | 83   | 1 | IKDAMIACADVSKGY               | cytosol | nucleoside metabolic process; purine nucleoside metabolic process; cellular aromatic compound metabolic process; cellular aromatic compound metabolic process; purine ribonucleoside monophosphate metabolic process; ribonucleotide metabolic process; nucleotide metabolic process; single-organism process; cellular metabolic process; phosphate-containing compound metabolic process; organic substance metabolic process; metabolic process; heterocycle metabolic process; nucleobase-containing compound metabolic process; nucleoside phosphate metabolic process; carbohydrate derivative metabolic process; ribose phosphate metabolic process; cellular nitrogen compound metabolic process; nucleobase-containing small molecule metabolic process; purine nucleoside triphosphate metabolic process; cellular process; ATP metabolic process; small molecule metabolic process; single-organism cellular process; purine ribonucleoside triphosphate metabolic process; nitrogen compound metabolic process; organic cyclic compound metabolic process; purine-containing compound metabolic process; nucleoside triphosphate metabolic process; primary metabolic process; ribonucleoside triphosphate metabolic process; purine nucleoside metabolic process; | ATP binding; nucleoside phosphate binding; adenylylate kinase activity; nucleoside binding; ion binding; nucleobase-containing compound kinase activity; nucleotide binding; nucleotide kinase activity; phosphotransferase activity, phosphate group as acceptor; organic cyclic compound binding; heterocyclic compound binding; ribonucleoside binding; carbohydrate derivative binding; kinase activity; ribonucleotide binding; catalytic activity; binding; purine ribonucleoside binding; purine ribonucleotide binding; anion binding; adenylyl ribonucleotide binding; adenylyl nucleotide binding; purine nucleoside binding; transferase activity; purine nucleotide binding; small molecule binding; purine ribonucleoside triphosphate binding; transferase activity, transferring phosphorus-containing groups; | K00939                                                                                                                                                                                                                                                                                                                                                                                                                                                                                                                                                                                                                                                                                                                                                                                  | adk; adenylylate kinase [EC:2.7.4.3]              | dre01100 Metabolic pathways - Danio rerio (zebrafish); dre00230 Purine metabolism - Danio rerio (zebrafish);                              | IPR027417;                                                    | P-loop containing nucleoside triphosphate hydrolase;                                                                                                               |                                                                                                                                                                    |
| P13104 | tpma    | Tropomyosin alpha-1 chain                         | _DAQEK(cr)LELAEK_            | 70   | 1 | ALKDAQEKLELAEK .....K.E.....  | cytosol | cytoskeleton; organelle; intracellular organelle; intracellular non-membrane-bounded organelle; cell part; intracellular; cytoplasm; intracellular part; cell; non-membrane-bounded organelle;                                                                                                                                                                                                                                                                                                                                                                                                                                                                                                                                                                                                                                                                                                                                                                                                                                                                                                                                                                                                                                                                                 |                                                                                                                                                                                                                                                                                                                                                                                                                                                                                                                                                                                                                                                                                                                                                                                                                               | K10373                                                                                                                                                                                                                                                                                                                                                                                                                                                                                                                                                                                                                                                                                                                                                                                  | TPM1; tropomyosin 1                               | dre04260 Cardiac muscle contraction - Danio rerio (zebrafish); dre04261 Adrenergic signaling in cardiomyocytes - Danio rerio (zebrafish); |                                                               |                                                                                                                                                                    |                                                                                                                                                                    |
| E7F7C7 | -       | Histone H4                                        | _DAVYTEHAK(cr)_              | 78   | 1 | VYTEHAKRKTVTAM                | nuclear | cellular component biogenesis; cellular component organization; nucleosome organization; cellular macromolecular complex assembly; chromatin assembly or disassembly; protein complex subunit organization; macromolecular complex subunit organization; protein-DNA complex assembly; DNA packaging; nucleosome assembly; chromosome organization; cellular component organization; macromolecular complex assembly; organelle organization; chromatin organization; protein complex biogenesis; chromatin assembly; cellular process; protein complex assembly; cellular component organization or biogenesis; protein-DNA complex subunit organization; DNA conformation change;                                                                                                                                                                                                                                                                                                                                                                                                                                                                                                                                                                                            | intracellular organelle; intracellular non-membrane-bounded organelle; intracellular organelle part; macromolecular complex; intracellular part; cell; organelle part; DNA bending complex; chromosomal part; nucleosome; non-membrane-bounded organelle; intracellular membrane-bounded organelle; organelle; nucleus; chromatin; cell part; intracellular; chromosome; membrane-bounded organelle; protein complex; protein-DNA complex; DNA packaging complex;                                                                                                                                                                                                                                                                                                                                                             | organic cyclic compound binding; heterocyclic compound binding; DNA binding; binding; nucleic acid binding;                                                                                                                                                                                                                                                                                                                                                                                                                                                                                                                                                                                                                                                                             |                                                   |                                                                                                                                           | IPR009072; IPR007125;                                         | Histone-fold; Histone core;                                                                                                                                        |                                                                                                                                                                    |
| Q5RHQ7 | hnrnpub | Uncharacterized protein                           | _DEASK(cr)LLEK_              | 581  | 1 | LQKDEASKLLEKYKE .....K.L..... | nuclear | organelle; intracellular membrane-bounded organelle; intracellular organelle; nucleus; cell part; intracellular; macromolecular complex; intracellular part; ribonucleoprotein complex; membrane-bounded organelle; cell;                                                                                                                                                                                                                                                                                                                                                                                                                                                                                                                                                                                                                                                                                                                                                                                                                                                                                                                                                                                                                                                      | organic cyclic compound binding; heterocyclic compound binding; binding; nucleic acid binding;                                                                                                                                                                                                                                                                                                                                                                                                                                                                                                                                                                                                                                                                                                                                | K12888                                                                                                                                                                                                                                                                                                                                                                                                                                                                                                                                                                                                                                                                                                                                                                                  | HNRNP1; heterogeneous nuclear ribonucleoprotein U | dre03040 Spliceosome - Danio rerio (zebrafish);                                                                                           | IPR003034; IPR001870; IPR024177; IPR003877;                   | SAP domain; B30.2/SPRY domain; P-loop containing nucleoside triphosphate hydrolase; SPRY domain;                                                                   |                                                                                                                                                                    |
| Q8JH0  | slc25a5 | Solute carrier family 25 alpha, member 5          | _DEGGK(cr)AFFK_              | 268  | 1 | IARDEGGKAFFKGAW               | cytosol | transport; transmembrane transport; single-organism localization; single-organism cellular process; single-organism process; localization; cellular process; single-organism transport; establishment of localization;                                                                                                                                                                                                                                                                                                                                                                                                                                                                                                                                                                                                                                                                                                                                                                                                                                                                                                                                                                                                                                                         | intracellular organelle; membrane; mitochondrial part; organelle membrane; organelle envelope; intracellular organelle part; cytoplasm; intrinsic component of membrane; intracellular part; cell; integral component of membrane; organelle part; mitochondrion; organelle; intracellular membrane-bounded organelle; mitochondrial envelope; intracellular; cell part; membrane part; envelope; organelle inner membrane; membrane-bounded organelle; mitochondrial inner membrane; mitochondrial membrane; cytoplasmic part;                                                                                                                                                                                                                                                                                               | transporter activity;                                                                                                                                                                                                                                                                                                                                                                                                                                                                                                                                                                                                                                                                                                                                                                   | K05863                                            | SLC25A4S; solute carrier family 25 (mitochondrial adenine nucleotide translocator), member 4/5/6/31                                       | dre04020 Calcium signaling pathway - Danio rerio (zebrafish); | IPR023395;                                                                                                                                                         | Mitochondrial carrier domain;                                                                                                                                      |
| Q6IQX1 | myhz2   | Myosin, heavy polypeptide 2, fast muscle specific | _DFETAQLLSK(cr)IEDEQSLGALQK_ | 1095 | 1 | ETAQLLSKIEDEQSL .....K.E..... | cytosol | response to stress; response to stimulus;                                                                                                                                                                                                                                                                                                                                                                                                                                                                                                                                                                                                                                                                                                                                                                                                                                                                                                                                                                                                                                                                                                                                                                                                                                      | intracellular organelle; intracellular non-membrane-bounded organelle; cytoskeleton part; intracellular organelle part; macromolecular complex; intracellular part; cell; actin cytoskeleton; organelle part; non-membrane-bounded organelle; organelle; cytoskeleton; cell part; intracellular; myosin complex; protein complex;                                                                                                                                                                                                                                                                                                                                                                                                                                                                                             | ATP binding; motor activity; nucleoside phosphate binding; nucleoside binding; ion binding; hydrolase activity, acting on acid anhydrides; hydrolase activity; nucleotide binding; nucleoside-triphosphatase activity; organic cyclic compound binding; heterocyclic compound binding; ribonucleoside binding; carbohydrate derivative binding; pyrophosphatase activity; catalytic activity; ribonucleotide binding; binding; purine ribonucleoside binding; anion binding; purine ribonucleotide binding; adenylyl ribonucleotide binding; adenylyl nucleotide binding; purine nucleoside binding; hydrolase activity, acting on acid anhydrides, in phosphorus-containing anhydrides; purine nucleotide binding; small molecule binding; purine ribonucleoside triphosphate binding; | K10352                                            | MYH; myosin heavy chain                                                                                                                   | dre04530 Tight junction - Danio rerio (zebrafish);            | IPR002928; IPR004009; IPR001609; IPR027417; IPR027401;                                                                                                             | Myosin tail; Myosin, N-terminal, SH3-like; Myosin head, motor domain; P-loop containing nucleoside triphosphate hydrolase; Myosin-like IQ motif-containing domain; |

|        |         |                                          |                               |      |   |                  |               |                 |                                                                                                                                                                                                                                                                                                                                                                                                                                                                                                                                                                                                                                                                                                                                                                  |                                                                                                                                                                                                                                                                                                                                                                                                                                                                                                                                                                                                                                                                                                                                                                                         |        |                                                                                                     |                                                                                                                                                                                                                                                                                                  |                                                        |                                                                                                                                                                    |
|--------|---------|------------------------------------------|-------------------------------|------|---|------------------|---------------|-----------------|------------------------------------------------------------------------------------------------------------------------------------------------------------------------------------------------------------------------------------------------------------------------------------------------------------------------------------------------------------------------------------------------------------------------------------------------------------------------------------------------------------------------------------------------------------------------------------------------------------------------------------------------------------------------------------------------------------------------------------------------------------------|-----------------------------------------------------------------------------------------------------------------------------------------------------------------------------------------------------------------------------------------------------------------------------------------------------------------------------------------------------------------------------------------------------------------------------------------------------------------------------------------------------------------------------------------------------------------------------------------------------------------------------------------------------------------------------------------------------------------------------------------------------------------------------------------|--------|-----------------------------------------------------------------------------------------------------|--------------------------------------------------------------------------------------------------------------------------------------------------------------------------------------------------------------------------------------------------------------------------------------------------|--------------------------------------------------------|--------------------------------------------------------------------------------------------------------------------------------------------------------------------|
| B8A568 | myzh1.1 | Uncharacterized protein                  | _DFETSQLLSK(cr)EIQESQLGAQLQK_ | 1095 | 1 | ETSQLLSKIEDEQSL  | .....K.E..... | nuclear         | intracellular organelle; intracellular non-membrane-bounded organelle; cytoskeleton part; intracellular organelle part; macromolecular complex; intracellular part; cell; actin cytoskeleton; organelle part; non-membrane-bounded organelle; organelle; cytoskeleton; cell part; intracellular; myosin complex; protein complex;                                                                                                                                                                                                                                                                                                                                                                                                                                | ATP binding; motor activity; nucleoside phosphate binding; nucleoside binding; ion binding; hydrolase activity, acting on acid anhydrides; hydrolase activity; nucleotide binding; nucleoside-triphosphatase activity; organic cyclic compound binding; heterocyclic compound binding; ribonucleoside binding; carbohydrate derivative binding; pyrophosphatase activity; catalytic activity; ribonucleotide binding; binding; purine ribonucleoside binding; anion binding; purine ribonucleotide binding; adenylyl ribonucleotide binding; adenylyl nucleotide binding; purine nucleoside binding; hydrolase activity, acting on acid anhydrides, in phosphorus-containing anhydrides; purine nucleotide binding; small molecule binding; purine ribonucleoside triphosphate binding. | K10352 | MYH; myosin heavy chain                                                                             | dre04630 Tight junction - Danio rerio (zebrafish);                                                                                                                                                                                                                                               | IPR002928; IPR004009; IPR001609; IPR027417; IPR027401; | Myosin tail; Myosin, N-terminal, SH3-like; Myosin head, motor domain; P-loop containing nucleoside triphosphate hydrolase; Myosin-like IQ motif-containing domain; |
| B8A561 | myzh1.2 | Uncharacterized protein                  | _DFETSQLLSK(cr)EIQESQLGAQLQK_ | 1095 | 1 | ETSQLLSKIEDEQSL  | .....K.E..... | nuclear         | intracellular organelle; intracellular non-membrane-bounded organelle; cytoskeleton part; intracellular organelle part; macromolecular complex; intracellular part; cell; actin cytoskeleton; organelle part; non-membrane-bounded organelle; organelle; cytoskeleton; cell part; intracellular; myosin complex; protein complex;                                                                                                                                                                                                                                                                                                                                                                                                                                | ATP binding; motor activity; nucleoside phosphate binding; nucleoside binding; ion binding; hydrolase activity, acting on acid anhydrides; hydrolase activity; nucleotide binding; nucleoside-triphosphatase activity; organic cyclic compound binding; heterocyclic compound binding; ribonucleoside binding; carbohydrate derivative binding; pyrophosphatase activity; catalytic activity; ribonucleotide binding; binding; purine ribonucleoside binding; anion binding; purine ribonucleotide binding; adenylyl ribonucleotide binding; adenylyl nucleotide binding; purine nucleoside binding; hydrolase activity, acting on acid anhydrides, in phosphorus-containing anhydrides; purine nucleotide binding; small molecule binding; purine ribonucleoside triphosphate binding. | K10352 | MYH; myosin heavy chain                                                                             | dre04630 Tight junction - Danio rerio (zebrafish);                                                                                                                                                                                                                                               | IPR002928; IPR004009; IPR001609; IPR027417; IPR027401; | Myosin tail; Myosin, N-terminal, SH3-like; Myosin head, motor domain; P-loop containing nucleoside triphosphate hydrolase; Myosin-like IQ motif-containing domain; |
| Q8JH0  | slc25a5 | Solute carrier family 25 alpha, member 5 | _DLFAGGAAAIK(cr)TAVAPIER_     | 23   | 1 | GIAAIAKTAFAIE    |               | cytosol         | transport; transmembrane transport; single-organism localization; single-organism cellular process; single-organism process; localization; cellular process; single-organism transport; establishment of localization;                                                                                                                                                                                                                                                                                                                                                                                                                                                                                                                                           | intracellular organelle; membrane; mitochondrial part; organelle membrane; organelle envelope; intracellular organelle part; cytoplasm; intrinsic component of membrane; intracellular part; cell; integral component of membrane; organelle part; mitochondrion; organelle; intracellular membrane-bounded organelle; mitochondrial envelope; intracellular; cell part; membrane part; envelope; organelle inner membrane; mitochondrial inner membrane; mitochondrial membrane; cytoplasmic part                                                                                                                                                                                                                                                                                      | K05863 | SLC25A4S; solute carrier family 25 (mitochondrial adenine nucleotide translocator), member 4/5/6/31 | dre04020 Calcium signaling pathway - Danio rerio (zebrafish);                                                                                                                                                                                                                                    | IPR023395;                                             | Mitochondrial carrier domain;                                                                                                                                      |
| B8JN01 | -       | Histone H2A                              | _DFLETVK(cr)ELR_              | 241  | 1 | KDFLETVKELRKSQG  | .....K.L..... | mitochondrial   | cellular component biogenesis; cellular component organization; nucleosome organization; cellular macromolecular complex assembly; chromatin assembly or disassembly; protein complex subunit organization; macromolecular complex subunit organization; protein-DNA complex assembly; DNA packaging; nucleosome assembly; chromosome organization; cellular component assembly; macromolecular complex assembly; organelle organization; chromatin organization; protein complex biogenesis; chromatin assembly; cellular process; protein complex assembly; cellular component organization or biogenesis; protein-DNA complex subunit organization; DNA conformation change;                                                                                  | intracellular organelle; intracellular non-membrane-bounded organelle; intracellular organelle part; macromolecular complex; intracellular part; cell; organelle part; DNA bending complex; chromosomal part; nucleosome; non-membrane-bounded organelle; intracellular membrane-bounded organelle; organelle; nucleus; chromatin; cell part; intracellular; chromosome; membrane-bounded organelle; protein complex; protein-DNA complex; DNA packaging complex;                                                                                                                                                                                                                                                                                                                       |        |                                                                                                     | organic cyclic compound binding; heterocyclic compound binding; DNA binding; nucleic acid binding;                                                                                                                                                                                               | IPR002119; IPR009072; IPR007125;                       | Histone H2A; Histone fold; Histone core;                                                                                                                           |
| B0S564 | -       | Protein disulfide-isomerase              | _DFQDK(cr)MDQFK_              | 269  | 1 | AAKDFQDKMDQFKKA  | .....DK.....  | extracellular   | regulation of cellular process; regulation of biological quality; small molecule metabolic process; cell redox homeostasis; single-organism cellular process; ether metabolic process; cellular homeostasis; single-organism process; organic substance metabolic process; homeostatic process; metabolic process; regulation of biological process; single-organism metabolic process; glycerol ether metabolic process; cellular process; biological regulation;                                                                                                                                                                                                                                                                                               | organelle; intracellular membrane-bounded organelle; intracellular organelle; endoplasmic reticulum; cell part; intracellular; cytoplasm; endomembrane system; macromolecular complex; intracellular part; membrane-bounded organelle; cell; protein complex; collagen trimer; cytoplasmic part;                                                                                                                                                                                                                                                                                                                                                                                                                                                                                        | K09580 | PDI A1; protein disulfide-isomerase A1 [EC:5.3.4.1]                                                 | dre04141 Protein processing in endoplasmic reticulum - Danio rerio (zebrafish);                                                                                                                                                                                                                  | IPR005788; IPR013766; IPR012336;                       | Disulphide isomerase; Thioresdoxin domain; Thioresdoxin-like fold;                                                                                                 |
| F1QJP3 | myl10   | Uncharacterized protein                  | _DGFIDK(cr)NDLR_              | 45   | 1 | NRDGFIDKNDLRDTF  | .....K.L..... | cytosol,nuclear |                                                                                                                                                                                                                                                                                                                                                                                                                                                                                                                                                                                                                                                                                                                                                                  | cation binding; metal ion binding; calcium ion binding; binding; ion binding;                                                                                                                                                                                                                                                                                                                                                                                                                                                                                                                                                                                                                                                                                                           |        |                                                                                                     |                                                                                                                                                                                                                                                                                                  | IPR002048; IPR011992;                                  | EF-hand domain; EF-hand domain pair;                                                                                                                               |
| Q93409 | mylfla  | Uncharacterized protein                  | _DGHSIK(cr)DDLRL_             | 48   | 1 | NRDGHISKDDLRLDVL |               | cytosol,nuclear |                                                                                                                                                                                                                                                                                                                                                                                                                                                                                                                                                                                                                                                                                                                                                                  | cation binding; metal ion binding; calcium ion binding; binding; ion binding;                                                                                                                                                                                                                                                                                                                                                                                                                                                                                                                                                                                                                                                                                                           | K12758 | MYLFP; fast skeletal myosin light chain 2                                                           | dre04510 Focal adhesion - Danio rerio (zebrafish); dre04530 Tight junction - Danio rerio (zebrafish); dre04810 Regulation of actin cytoskeleton - Danio rerio (zebrafish);                                                                                                                       | IPR011992; IPR002048;                                  | EF-hand domain pair; EF-hand domain;                                                                                                                               |
| Q6TH14 | -       | Enolase                                  | _DIAPK(cr)LIEK_               | 76   | 1 | VNKDIAPKLIEKFS   | .....K.L..... | mitochondrial   | single-organism carbohydrate catabolic process; glycolytic process; single-organism catabolic process; small molecule metabolic process; single-organism cellular process; single-organism process; carbohydrate metabolic process; primary metabolic process; cellular metabolic process; organic substance metabolic process; carbohydrate catabolic process; single-organism carbohydrate metabolic process; organic substance catabolic process; metabolic process; pyruvate metabolic process; generation of precursor metabolites and energy; single-organism metabolic process; carboxylic acid metabolic process; monocarboxylic acid metabolic process; organic acid metabolic process; cellular process; catabolic process; oxoacid metabolic process; | catalytic complex; cell part; intracellular; cytoplasm; macromolecular complex; intracellular part; cytosolic part; cell; cytosol; protein complex; phosphopyruvate hydratase complex; cytoplasmic part;                                                                                                                                                                                                                                                                                                                                                                                                                                                                                                                                                                                | K01689 | ENO; enolase [EC:4.2.1.11]                                                                          | dre00010 Glycolysis / Gluconeogenesis - Danio rerio (zebrafish); dre01230 Biosynthesis of amino acids - Danio rerio (zebrafish); dre0200 Carbon metabolism - Danio rerio (zebrafish); dre01100 Metabolic pathways - Danio rerio (zebrafish); dre03018 RNA degradation - Danio rerio (zebrafish); | IPR029065; IPR020810; IPR029017; IPR020811;            | Enolase C-terminal domain-like; Enolase, C-terminal; Enolase N-terminal; Enolase, N-terminal;                                                                      |

|        |        |                                                 |                   |     |   |                  |              |                 |                                                                                                                                                                                                                                                                                                                                                                                                                                                                                                                                                                                                                                                                                                                                                                                                                                                                                                                                                                                                                                                                                                                                                                                                                                                                                                                                                                                                                                                                                                                                                                                                                                                                                                                                                                                                                                                                                                                                                                                                                                                                                                                                                                                                                                                                                                                                                                                                                                                                |                                                                                                                                                                                                                                                                                                                                                                                                                                                                                                                                                                                                                                                                                                                                                                                                                                                                                  |                                                                                                                                                                                                                                                                                                                                                                                                                                                                                                                                                                                                                                                                                                                                                                                                                                                                                                                                                                                                                                                                                                                                                                                                                                                                                                                                                                                                                                                                                                                                            |                                                                                         |                                                               |                                                                                                    |                                                                                                                                                                                                         |
|--------|--------|-------------------------------------------------|-------------------|-----|---|------------------|--------------|-----------------|----------------------------------------------------------------------------------------------------------------------------------------------------------------------------------------------------------------------------------------------------------------------------------------------------------------------------------------------------------------------------------------------------------------------------------------------------------------------------------------------------------------------------------------------------------------------------------------------------------------------------------------------------------------------------------------------------------------------------------------------------------------------------------------------------------------------------------------------------------------------------------------------------------------------------------------------------------------------------------------------------------------------------------------------------------------------------------------------------------------------------------------------------------------------------------------------------------------------------------------------------------------------------------------------------------------------------------------------------------------------------------------------------------------------------------------------------------------------------------------------------------------------------------------------------------------------------------------------------------------------------------------------------------------------------------------------------------------------------------------------------------------------------------------------------------------------------------------------------------------------------------------------------------------------------------------------------------------------------------------------------------------------------------------------------------------------------------------------------------------------------------------------------------------------------------------------------------------------------------------------------------------------------------------------------------------------------------------------------------------------------------------------------------------------------------------------------------------|----------------------------------------------------------------------------------------------------------------------------------------------------------------------------------------------------------------------------------------------------------------------------------------------------------------------------------------------------------------------------------------------------------------------------------------------------------------------------------------------------------------------------------------------------------------------------------------------------------------------------------------------------------------------------------------------------------------------------------------------------------------------------------------------------------------------------------------------------------------------------------|--------------------------------------------------------------------------------------------------------------------------------------------------------------------------------------------------------------------------------------------------------------------------------------------------------------------------------------------------------------------------------------------------------------------------------------------------------------------------------------------------------------------------------------------------------------------------------------------------------------------------------------------------------------------------------------------------------------------------------------------------------------------------------------------------------------------------------------------------------------------------------------------------------------------------------------------------------------------------------------------------------------------------------------------------------------------------------------------------------------------------------------------------------------------------------------------------------------------------------------------------------------------------------------------------------------------------------------------------------------------------------------------------------------------------------------------------------------------------------------------------------------------------------------------|-----------------------------------------------------------------------------------------|---------------------------------------------------------------|----------------------------------------------------------------------------------------------------|---------------------------------------------------------------------------------------------------------------------------------------------------------------------------------------------------------|
| QZ7X4  | cc6a   | Chaperonin containing TCP1, subunit 6A (Zeta 1) | _DK(cr)ALAVLEEVK_ | 129 | 1 | GFEAAKDKALAVLEE  | .....DK..... | cytol           | protein folding; metabolic process; cellular protein metabolic process; cellular macromolecule metabolic process; macromolecule metabolic process; protein metabolic process; primary metabolic process; cellular process; cellular metabolic process; organic substance metabolic process;                                                                                                                                                                                                                                                                                                                                                                                                                                                                                                                                                                                                                                                                                                                                                                                                                                                                                                                                                                                                                                                                                                                                                                                                                                                                                                                                                                                                                                                                                                                                                                                                                                                                                                                                                                                                                                                                                                                                                                                                                                                                                                                                                                    | intraocular part; cell; cell part; intraocular cytoplasm;                                                                                                                                                                                                                                                                                                                                                                                                                                                                                                                                                                                                                                                                                                                                                                                                                        | ATP binding; nucleoside phosphate binding; nucleoside binding; ion binding; nucleotide binding; organic cyclic compound binding; heterocyclic compound binding; ribonucleoside binding; carboxylate derivative binding; ribonucleotide binding; binding; purine ribonucleoside binding; anion binding; purine ribonucleotide binding; adenylyl ribonucleotide binding; adenylyl nucleotide binding; purine nucleoside binding; purine nucleotide binding; small molecule binding; purine ribonucleoside triphosphate binding;                                                                                                                                                                                                                                                                                                                                                                                                                                                                                                                                                                                                                                                                                                                                                                                                                                                                                                                                                                                                              | K09498                                                                                  | IPR027410; IPR027409; IPR027413                               | TCP-1-like chaperonin intermediate domain; GroEL-like apical domain; GroEL-like equatorial domain; |                                                                                                                                                                                                         |
| E9Q064 | cc6a   | Uncharacterized protein                         | _DK(cr)ALAVLEEVK_ | 84  | 1 | IKAANKDKALAVLEE  | .....DK..... | cytol           | protein folding; metabolic process; cellular protein metabolic process; cellular macromolecule metabolic process; protein metabolic process; primary metabolic process; cellular process; cellular metabolic process; organic substance metabolic process;                                                                                                                                                                                                                                                                                                                                                                                                                                                                                                                                                                                                                                                                                                                                                                                                                                                                                                                                                                                                                                                                                                                                                                                                                                                                                                                                                                                                                                                                                                                                                                                                                                                                                                                                                                                                                                                                                                                                                                                                                                                                                                                                                                                                     | intraocular part; cell; cell part; intraocular cytoplasm;                                                                                                                                                                                                                                                                                                                                                                                                                                                                                                                                                                                                                                                                                                                                                                                                                        | ATP binding; nucleoside phosphate binding; nucleoside binding; ion binding; nucleotide binding; organic cyclic compound binding; heterocyclic compound binding; ribonucleoside binding; carboxylate derivative binding; ribonucleotide binding; binding; purine ribonucleoside binding; anion binding; purine ribonucleotide binding; adenylyl ribonucleotide binding; adenylyl nucleotide binding; purine nucleoside binding; purine nucleotide binding; small molecule binding; purine ribonucleoside triphosphate binding;                                                                                                                                                                                                                                                                                                                                                                                                                                                                                                                                                                                                                                                                                                                                                                                                                                                                                                                                                                                                              |                                                                                         | IPR027410; IPR027409; IPR027413                               | TCP-1-like chaperonin intermediate domain; GroEL-like apical domain; GroEL-like equatorial domain; |                                                                                                                                                                                                         |
| Q64220 | atp2a1 | Calcium-transporting ATPase                     | _DK(cr)IMAVIK_    | 544 | 1 | LTGFPVKDKIMAVIKE | .....DK..... | plasma membrane | nucleoside metabolic process; purine nucleoside metabolic process; purine ribonucleoside monophosphate metabolic process; nucleotide metabolic process; single-organism process; purine ribonucleoside biosynthetic process; nucleoside biosynthetic process; biosynthetic process; ribonucleoside monophosphate biosynthetic process; cellular metabolic process; phosphate-containing compound metabolic process; ribose phosphate biosynthetic process; metabolic process; carbohydrate derivative biosynthetic process; nucleoside phosphate metabolic process; ribose phosphate metabolic process; purine nucleoside triphosphate biosynthetic process; heterocycle biosynthetic process; purine ribonucleoside triphosphate biosynthetic process; small molecule metabolic process; ATP biosynthetic process; single-organism cellular process; purine ribonucleoside triphosphate metabolic process; organic cyclic compound metabolic process; purine-containing compound metabolic process; ribonucleoside triphosphate metabolic process; purine ribonucleoside monophosphate biosynthetic process; purine nucleoside biosynthetic process; organophosphate biosynthetic process; ribonucleoside biosynthetic process; regulation of biological quality; nucleoside metabolic process; purine nucleoside metabolic process; cellular divalent inorganic cation homeostasis; purine ribonucleoside monophosphate metabolic process; nucleotide metabolic process; positive regulation of muscle contraction; negative regulation of multicellular organismal process; single-organism process; purine ribonucleoside biosynthetic process; nucleoside biosynthetic process; ribonucleoside monophosphate biosynthetic process; response to external stimulus; ribose phosphate biosynthetic process; cellular metabolic process; phosphate-containing compound metabolic process; derivative biosynthetic process; positive regulation of multicellular organismal process; nucleoside phosphate metabolic process; regulation of skeletal muscle contraction; metal ion homeostasis; regulation of system process; ribose phosphate metabolic process; purine nucleoside triphosphate biosynthetic process; heterocycle biosynthetic process; purine ribonucleoside triphosphate biosynthetic process; ion homeostasis; calcium ion homeostasis; small molecule metabolic process; negative regulation of striated muscle contraction; inorganic ion | intrinsic component of membrane; membrane; integral component of membrane; membrane part;                                                                                                                                                                                                                                                                                                                                                                                                                                                                                                                                                                                                                                                                                                                                                                                        | ATPase activity, coupled to transmembrane movement of ions; nucleoside phosphate binding; primary active transmembrane transporter activity; substrate-specific transporter activity; hydrolase activity, acting on acid anhydrides; catalyzing transmembrane movement of substances; anion binding; adenylyl ribonucleotide binding; adenylyl nucleotide binding; inorganic cation transmembrane transporter activity; hydrolase activity, acting on acid anhydrides, in phosphorus-containing anhydrides; transporter activity; purine nucleotide binding; purine ribonucleoside triphosphate binding; active transmembrane transporter activity; ATP binding; ion transmembrane transporter activity; ion binding; nucleoside binding; nucleotide binding; P-P-bond-hydrolysis-driven transmembrane transporter activity; ATPase activity, coupled to transmembrane movement of ions, phosphorylative mechanism; divalent inorganic cation transmembrane transporter activity; carbohydrate derivative binding; calcium-transporting ATPase activity; ATPase activity, coupled to transmembrane movement of ions, phosphorylative mechanism; divalent inorganic cation transmembrane transporter activity; calcium-transporting ATPase activity; ATPase activity, coupled to transmembrane movement of ions, phosphorylative mechanism; divalent inorganic cation transmembrane transporter activity; purine nucleoside binding; cation transmembrane transporter activity; transmembrane transporter activity; small molecule binding; | ATP2A; Ca2+ transportin g ATPase, sarcoplasmic mic/endorpl asmic reticulum [EC:3.6.3.8] | dna04020 Calcium signaling pathway - Danio rerio (zebrafish); | IPR023298; IPR004014; IPR023299; IPR008250; IPR006068; IPR023214;                                  | P-type ATPase, transmembrane domain; Cation-transporting P-type ATPase, N-terminal; P-type ATPase, domain N; P-type ATPase, A domain; Cation-transporting P-type ATPase, C-terminal; HAD-like domain;   |
| Q5U344 | atp2a1 | Calcium-transporting ATPase                     | _DK(cr)IMAVIK_    | 544 | 1 | LTGFPVKDKIMAVIKE | .....DK..... | plasma membrane | nucleoside metabolic process; purine nucleoside metabolic process; cellular divalent inorganic cation homeostasis; purine ribonucleoside monophosphate metabolic process; nucleotide metabolic process; positive regulation of muscle contraction; negative regulation of multicellular organismal process; single-organism process; purine ribonucleoside biosynthetic process; nucleoside biosynthetic process; ribonucleoside monophosphate biosynthetic process; response to external stimulus; ribose phosphate biosynthetic process; cellular metabolic process; phosphate-containing compound metabolic process; derivative biosynthetic process; positive regulation of multicellular organismal process; nucleoside phosphate metabolic process; regulation of skeletal muscle contraction; metal ion homeostasis; regulation of system process; ribose phosphate metabolic process; purine nucleoside triphosphate biosynthetic process; heterocycle biosynthetic process; purine ribonucleoside triphosphate biosynthetic process; ion homeostasis; calcium ion homeostasis; small molecule metabolic process; negative regulation of striated muscle contraction; inorganic ion                                                                                                                                                                                                                                                                                                                                                                                                                                                                                                                                                                                                                                                                                                                                                                                                                                                                                                                                                                                                                                                                                                                                                                                                                                                                    | membrane; endoplasmic reticulum; nuclear outer membrane-endoplasmic reticulum membrane network; organelle membrane; myofibril; cytoplasm; intrinsic component of membrane; intracellular part; sarcoplasm; cell; I band; organelle part; non-membrane-bounded organelle; intracellular; cell part; membrane part; contractile fiber; membrane region; perinuclear region of cytoplasm; membrane-bounded organelle; endoplasmic reticulum membrane; intracellular organelle; bounding membrane of organelle; intracellular non-membrane-bounded organelle; H zone; intracellular organelle part; sarcoplasmic reticulum; endomembrane system; integral component of membrane; organelle; intracellular membrane-bounded organelle; endoplasmic reticulum part; endoplasmic reticulum-Golgi intermediate compartment; A band; sarcomere; contractile fiber part; cytoplasmic part; | ATPase activity, coupled to transmembrane movement of ions; nucleoside phosphate binding; primary active transmembrane transporter activity; substrate-specific transporter activity; hydrolase activity, acting on acid anhydrides; catalyzing transmembrane movement of substances; anion binding; adenylyl ribonucleotide binding; adenylyl nucleotide binding; inorganic cation transmembrane transporter activity; hydrolase activity, acting on acid anhydrides, in phosphorus-containing anhydrides; transporter activity; purine nucleotide binding; purine ribonucleoside triphosphate binding; active transmembrane transporter activity; ATP binding; ion transmembrane transporter activity; ion binding; nucleoside binding; nucleotide binding; P-P-bond-hydrolysis-driven transmembrane transporter activity; ATPase activity, coupled to transmembrane movement of ions, phosphorylative mechanism; divalent inorganic cation transmembrane transporter activity; calcium-transporting ATPase activity; ATPase activity, coupled to transmembrane movement of ions, phosphorylative mechanism; divalent inorganic cation transmembrane transporter activity; metal ion binding; purine ribonucleoside binding; purine nucleoside binding; calcium ion binding; cation transmembrane transporter activity; transmembrane transporter activity; small molecule binding;                                                                                                                                                      | ATP2A; Ca2+ transportin g ATPase, sarcoplasmic mic/endorpl asmic reticulum [EC:3.6.3.8] | dna04020 Calcium signaling pathway - Danio rerio (zebrafish); | IPR004014; IPR023298; IPR008250; IPR023299; IPR006068; IPR023214;                                  | Cation-transporting P-type ATPase, N-terminal; P-type ATPase, transmembrane domain; P-type ATPase, A domain; P-type ATPase, C-terminal; Cation-transporting P-type ATPase, C-terminal; HAD-like domain; |

|        |                   |                                                          |                        |     |   |                  |               |                 |                                                                                                                                                                                                                                                                                                                                                                                                                                                                                                                                                                                                                                                                                                                                                                                                                                                                                                                                                                                                                                                                                                                                                                                                                                                                         |                                                                                                                                                                                                                                                                                                                                                                                                                                                                                                                                |                                                                                                             |                                |                                                                                                                                                                                                                                     |                                                                                                                                 |
|--------|-------------------|----------------------------------------------------------|------------------------|-----|---|------------------|---------------|-----------------|-------------------------------------------------------------------------------------------------------------------------------------------------------------------------------------------------------------------------------------------------------------------------------------------------------------------------------------------------------------------------------------------------------------------------------------------------------------------------------------------------------------------------------------------------------------------------------------------------------------------------------------------------------------------------------------------------------------------------------------------------------------------------------------------------------------------------------------------------------------------------------------------------------------------------------------------------------------------------------------------------------------------------------------------------------------------------------------------------------------------------------------------------------------------------------------------------------------------------------------------------------------------------|--------------------------------------------------------------------------------------------------------------------------------------------------------------------------------------------------------------------------------------------------------------------------------------------------------------------------------------------------------------------------------------------------------------------------------------------------------------------------------------------------------------------------------|-------------------------------------------------------------------------------------------------------------|--------------------------------|-------------------------------------------------------------------------------------------------------------------------------------------------------------------------------------------------------------------------------------|---------------------------------------------------------------------------------------------------------------------------------|
| O42248 | gnb21             | Guanine nucleotide-binding protein subunit beta-2-like 1 | _DK(cr)TIMWK_          | 38  | 1 | ILSASRDKTIMWKL   | .....DK.....  | cytosol,nuclear | positive regulation of embryonic development; regulation of cellular process; circulatory system development; morphogenesis of an epithelium; single-multicellular organism process; negative regulation of signal transduction; blood vessel development; regulation of signaling; single-organism process; negative regulation of biological process; negative regulation of cellular process; regulation of multicellular organismal process; gastrulation; anatomical structure morphogenesis; tissue morphogenesis; angiogenesis; regulation of cell communication; negative regulation of signaling; regulation of gastrulation; negative regulation of cell communication; positive regulation of multicellular organismal process; regulation of localization; regulation of protein localization; blood vessel morphogenesis; multicellular organismal development; embryo development; regulation of signal transduction; anatomical structure formation involved in morphogenesis; embryonic morphogenesis; developmental process; epithelium development; regulation of establishment or maintenance of cell polarity; tissue development; negative regulation of Wnt signaling pathway; convergent extension; system development; vasculature development; | intracellular part; cell; cell part; intracellular; cytoplasm;                                                                                                                                                                                                                                                                                                                                                                                                                                                                 | K14753                                                                                                      | IPR017986; IPR015943;          | WD40-repeat-containing domain; WD40/YVTN repeat-like-containing domain;                                                                                                                                                             |                                                                                                                                 |
| E9QDY3 | cyt1              | Uncharacterized protein                                  | _DLESWFOAK(cr)SES LNK_ | 297 | 1 | LESWFOAKSES LNKE | .....K.E..... | mitochondria    |                                                                                                                                                                                                                                                                                                                                                                                                                                                                                                                                                                                                                                                                                                                                                                                                                                                                                                                                                                                                                                                                                                                                                                                                                                                                         | intracellular organelle; intracellular non-membrane-bounded organelle; cytoskeletal part; intracellular organelle part; macromolecular complex; intracellular part; cell; organelle part; non-membrane-bounded organelle; organelle; cytoskeleton; intermediate filament cytoskeleton; cell part; intracellular; intermediate filament; protein complex;                                                                                                                                                                       | K07604                                                                                                      |                                |                                                                                                                                                                                                                                     |                                                                                                                                 |
| O6IQ92 | tnn1fal           | Troponin 1                                               | _DLHGK(cr)IDVVDEER_    | 73  | 1 | LCRDLDHGKIDVVDEE |               | mitochondria    |                                                                                                                                                                                                                                                                                                                                                                                                                                                                                                                                                                                                                                                                                                                                                                                                                                                                                                                                                                                                                                                                                                                                                                                                                                                                         |                                                                                                                                                                                                                                                                                                                                                                                                                                                                                                                                |                                                                                                             |                                |                                                                                                                                                                                                                                     |                                                                                                                                 |
| E7FZT3 | si:ch1073-159d7.7 | Uncharacterized protein                                  | _DLIVK(cr)TVTASKE_     | 53  | 1 | NVRDLIVKTVTASKE  | .....K.V..... | nuclear         | cellular component biogenesis; cellular component organization; nucleosome organization; cellular macromolecular complex assembly; chromatin assembly or disassembly; protein complex subunit organization; macromolecular complex subunit organization; protein-DNA complex assembly; DNA packaging; nucleosome assembly; chromosome organization; cellular component assembly; macromolecular complex assembly; organelle organization; chromatin organization; protein complex biogenesis; chromatin assembly; cellular process; protein complex assembly; cellular component organization or biogenesis; protein-DNA complex subunit organization; DNA conformation change;                                                                                                                                                                                                                                                                                                                                                                                                                                                                                                                                                                                         | intracellular organelle; intracellular non-membrane-bounded organelle; intracellular organelle part; macromolecular complex; intracellular part; cell; organelle part; DNA bending complex; chromosomal part; nucleosome; non-membrane-bounded organelle; intracellular membrane-bounded organelle; organelle; nucleus; chromatin; cell part; intracellular; chromosome; membrane-bounded organelle; protein complex; protein-DNA complex; DNA packaging complex;                                                              | organic cyclic compound binding; heterocyclic compound binding; DNA binding; binding; nucleic acid binding; | IPR011991; IPR005916;          | Winged helix-turn-helix DNA-binding domain; Linker histone H1/H5; domain H15;                                                                                                                                                       |                                                                                                                                 |
| E7EZ16 | -                 | Uncharacterized protein                                  | _DLK(cr)DIIPNVQER_     | 71  | 1 | LDSGKDLKIDIPNV   |               | cytosol         | protein folding; metabolic process; response to stress; cellular protein metabolic process; cellular macromolecule metabolic process; protein metabolic process; response to stimulus; primary metabolic process; cellular process; cellular metabolic process; organic substance metabolic process;                                                                                                                                                                                                                                                                                                                                                                                                                                                                                                                                                                                                                                                                                                                                                                                                                                                                                                                                                                    | ATP binding; nucleoside phosphate binding; nucleoside binding; ion binding; nucleotide binding; organic cyclic compound binding; heterocyclic compound binding; ribonucleoside binding; carbohydrate derivative binding; ribonucleotide binding; binding; purine ribonucleoside binding; anion binding; purine ribonucleotide binding; adenylyl ribonucleotide binding; adenylyl nucleotide binding; purine nucleoside binding; purine nucleotide binding; small molecule binding; purine ribonucleoside triphosphate binding; | K04079                                                                                                      | htpG; molecular chaperone HtpG | dre04914 Progesterone-mediated oocyte maturation - Danio rerio (zebrafish); dre04141 Protein processing in endoplasmic reticulum - Danio rerio (zebrafish); dre04621 NOD-like receptor signaling pathway - Danio rerio (zebrafish); | Ribosomal protein S5 domain 2-type fold; Haat shock protein Hsp90, N-terminal; Histidine kinase-like ATPase, C-terminal domain; |
| Q98V1  | actc1b            | Actin, alpha 1, skeletal muscle                          | _DLTDYLMK(cr)ILTER_    | 193 | 1 | DLTDYLMKILTERGY  | .....K.L..... | cytoskeleton    |                                                                                                                                                                                                                                                                                                                                                                                                                                                                                                                                                                                                                                                                                                                                                                                                                                                                                                                                                                                                                                                                                                                                                                                                                                                                         | ATP binding; nucleoside phosphate binding; nucleoside binding; ion binding; nucleotide binding; organic cyclic compound binding; heterocyclic compound binding; ribonucleoside binding; carbohydrate derivative binding; ribonucleotide binding; binding; purine ribonucleoside binding; anion binding; purine ribonucleotide binding; adenylyl ribonucleotide binding; adenylyl nucleotide binding; purine nucleoside binding; purine nucleotide binding; small molecule binding; purine ribonucleoside triphosphate binding; | K10354                                                                                                      |                                |                                                                                                                                                                                                                                     |                                                                                                                                 |



|        |          |                                                      |                            |     |   |                  |               |                 |                                                                                                                                                                                                                                                                                                                                                                                                                                                                                                                                                                                                                                                                                                                                                                                                                                                                                                                                                                                                                                                                                                                                                                                                                                                                   |                                                                                                                                                                                                                                                                                                                                                                                                                                                                                                                                                                                       |                                                                                                                                                                                                                                                                                                                                                                                                                                                                                                                                                                                                               |                                                                                                                                                                                   |                                                                                                                                                                                                                                            |                                                                                                                                                                                |
|--------|----------|------------------------------------------------------|----------------------------|-----|---|------------------|---------------|-----------------|-------------------------------------------------------------------------------------------------------------------------------------------------------------------------------------------------------------------------------------------------------------------------------------------------------------------------------------------------------------------------------------------------------------------------------------------------------------------------------------------------------------------------------------------------------------------------------------------------------------------------------------------------------------------------------------------------------------------------------------------------------------------------------------------------------------------------------------------------------------------------------------------------------------------------------------------------------------------------------------------------------------------------------------------------------------------------------------------------------------------------------------------------------------------------------------------------------------------------------------------------------------------|---------------------------------------------------------------------------------------------------------------------------------------------------------------------------------------------------------------------------------------------------------------------------------------------------------------------------------------------------------------------------------------------------------------------------------------------------------------------------------------------------------------------------------------------------------------------------------------|---------------------------------------------------------------------------------------------------------------------------------------------------------------------------------------------------------------------------------------------------------------------------------------------------------------------------------------------------------------------------------------------------------------------------------------------------------------------------------------------------------------------------------------------------------------------------------------------------------------|-----------------------------------------------------------------------------------------------------------------------------------------------------------------------------------|--------------------------------------------------------------------------------------------------------------------------------------------------------------------------------------------------------------------------------------------|--------------------------------------------------------------------------------------------------------------------------------------------------------------------------------|
| Q90474 | hsp90a.1 | Heat shock protein HSP 90-alpha 1                    | _DTQK(cr)HIYYITGK_         | 482 | 1 | SRMKDQTKHIYYITG  | .....K.L..... | cytosol         | <p>cellular component biogenesis; regulation of nitric oxide biosynthetic process; cellular developmental process; positive regulation of biosynthetic process; cellular component morphogenesis; single-organism process; cellular metabolic process; protein folding; actin cytoskeleton organization; metabolic process; cellular component assembly; positive regulation of metabolic process; macromolecular complex assembly; positive regulation of nitrogen compound metabolic process; protein metabolic process; macromolecule metabolic process; positive regulation of nitric oxide biosynthetic process; striated muscle myosin thick filament assembly; skeletal muscle thin filament assembly; skeletal muscle myosin thick filament assembly; developmental process; actomyosin structure organization; protein complex subunit organization; regulation of cellular biosynthetic process; single-organism cellular process; positive regulation of cellular process; myosin filament organization; regulation of cellular metabolic process; myosin filament assembly; sarcomerogenesis; multicellular organismal process; single-organism organelle organization; organ development; regulation of biological process; skeletal muscle cell</p> | <p>intracellular organelle; intracellular non-membrane-bounded organelle; cytoplasmic vesicle; membrane-bounded vesicle; myofibril; melanosome; cytoplasmic membrane-bounded vesicle; vesicle; cytoplasm; intracellular part; Z disc; cell; I band; organelle part; pigment granule; non-membrane-bounded organelle; intracellular membrane-bounded organelle; organelle; cell part; intracellular; sarcomere; contractile fiber; perinuclear region of cytoplasm; contractile fiber part; membrane-bounded organelle; cytoplasmic part;</p>                                          | <p>nitric-oxide synthase regulator activity; ATP binding; nucleoside phosphate binding; nucleoside binding; ion binding; nucleotide binding; molecular function regulator; organic cyclic compound binding; heterocyclic compound binding; ribonucleoside binding; carbohydrate derivative binding; enzyme regulator activity; ribonucleotide binding; binding; purine ribonucleoside binding; anion binding; purine ribonucleotide binding; adenylyl ribonucleotide binding; adenylyl nucleoside binding; purine nucleotide binding; small molecule binding; purine ribonucleoside triphosphate binding;</p> | <p>K04079</p> <p>htpG; molecular chaperone HtpG</p>                                                                                                                               | <p>dre04014 Progesterone-mediated oocyte maturation - Danio rerio (zebrafish); dre04141 Protein processing in endoplasmic reticulum - Danio rerio (zebrafish); dre04621 NOD-like receptor signaling pathway - Danio rerio (zebrafish);</p> | <p>IPR020568; IPR020575; IPR003594;</p> <p>Ribosomal protein S5 domain 2-type fold; Heat shock protein Hsp90, N-terminal; Histidine kinase-like ATPase, C-terminal domain;</p> |
| Q90ZM2 | sec61a1  | Protein transport protein Sec61 subunit alpha-like 1 | _DVAK(cr)QLK_              | 392 | 1 | SSAKDVAKLKEQQM   | .....K.L..... | plasma membrane | <p>developmental process; nervous system development; single-multicellular organism process; brain development; system development; single-organism process; organic substance transport; multicellular organismal process; protein transport; establishment of localization; establishment of protein localization; transport; organ development; habernula development; single-organism developmental process; diencephalon development; central nervous system development; head development; forebrain development; multicellular organismal development; protein localization; macromolecule localization; localization; anatomical structure development; epiphallus development;</p>                                                                                                                                                                                                                                                                                                                                                                                                                                                                                                                                                                       | <p>membrane; intracellular organelle; endoplasmic reticulum; nuclear outer membrane-endoplasmic reticulum membrane network; bounding membrane of organelle; organelle membrane; cytoplasm; intracellular organelle part; intrinsic component of membrane; endomembrane system; intracellular part; cell; integral component of membrane; organelle part; intracellular membrane-bounded organelle; organelle; endoplasmic reticulum part; intracellular; cell part; membrane part; membrane region; membrane-bounded organelle; endoplasmic reticulum membrane; cytoplasmic part;</p> | <p>structural molecule activity;</p>                                                                                                                                                                                                                                                                                                                                                                                                                                                                                                                                                                          | <p>K10956</p> <p>SEC61A; protein transport protein SEC61 subunit alpha</p>                                                                                                        | <p>dre03060 Protein export - Danio rerio (zebrafish); dre04145 Phagosome - Danio rerio (zebrafish); dre04141 Protein processing in endoplasmic reticulum - Danio rerio (zebrafish);</p>                                                    | <p>IPR023201; IPR019561;</p> <p>SecY subunit domain; Translocon Sec61/SecY plug domain;</p>                                                                                    |
| Q6NWF6 | kr8      | Keratin, type II cytoskeletal 8                      | _DVDEAYMKNK(cr)VELEAK_     | 231 | 1 | VDEAYMKNKVELEAKL | ..E...K.....  | mitochondria    | <p>intracellular organelle; intracellular non-membrane-bounded organelle; cytoskeletal part; intracellular organelle part; cytoplasm; nuclear lumen; macromolecular complex; intracellular part; cell; organelle part; keratin filament; non-membrane-bounded organelle; membrane-enclosed lumen; intracellular membrane-bounded organelle; organelle; cytoskeleton; nucleus; intracellular organelle lumen; intermediate filament cytoskeleton; intracellular; cell part; nuclear matrix; intermediate filament; nuclear periphery; membrane-bounded organelle; protein complex; organelle lumen; nuclear part;</p>                                                                                                                                                                                                                                                                                                                                                                                                                                                                                                                                                                                                                                              | <p>structural molecule activity;</p>                                                                                                                                                                                                                                                                                                                                                                                                                                                                                                                                                  | <p>K07805</p>                                                                                                                                                                                                                                                                                                                                                                                                                                                                                                                                                                                                 |                                                                                                                                                                                   |                                                                                                                                                                                                                                            |                                                                                                                                                                                |
| B0S564 | -        | Protein disulfide-isomerase                          | _DVESEDSK(cr)AFIK_         | 168 | 1 | DVESEDSKAFIKTAE  | ..E...K.....  | extracellular   | <p>regulation of cellular process; regulation of biological quality; small molecule metabolic process; cell redox homeostasis; single-organism cellular process; ether metabolic process; cellular homeostasis; single-organism process; organic substance metabolic process; homeostatic process; metabolic process; regulation of biological process; single-organism metabolic process; glycerol ether metabolic process; cellular process; biological regulation;</p>                                                                                                                                                                                                                                                                                                                                                                                                                                                                                                                                                                                                                                                                                                                                                                                         | <p>organelle; intracellular membrane-bounded organelle; intracellular organelle; endoplasmic reticulum; cell part; intracellular; cytoplasm; endomembrane system; macromolecular complex; intracellular part; membrane-bounded organelle; cell; protein complex; collagen trimer; cytoplasmic part;</p>                                                                                                                                                                                                                                                                               | <p>protein disulfide oxidoreductase activity; disulfide oxidoreductase activity; oxidoreductase activity, acting on single donors with incorporation of molecular oxygen, incorporation of two atoms of oxygen, electron carrier activity; oxidoreductase activity, acting on single donors with incorporation of molecular oxygen; isomerase activity; catalytic activity; dioxygenase activity; oxidoreductase activity, acting on a sulfur group of donors; oxidoreductase activity;</p>                                                                                                                   | <p>K09580</p> <p>PDIA1; protein disulfide-isomerase A1 [EC:5.3.4.1]</p>                                                                                                           | <p>dre04141 Protein processing in endoplasmic reticulum - Danio rerio (zebrafish);</p>                                                                                                                                                     | <p>IPR005788; IPR013766; IPR012336;</p> <p>Disulphide isomerase; Thioredoxin domain; Thioredoxin-like fold;</p>                                                                |
| Q93409 | mylfla   | Myf12 protein                                        | _DLVASMGLNKK(cr)NEELEMAMK_ | 64  | 1 | SMGQLNKKNEELEMAM | .....K.E..... | cytosol,nuclear | <p>cation binding; metal ion binding; calcium ion binding; binding; ion binding;</p>                                                                                                                                                                                                                                                                                                                                                                                                                                                                                                                                                                                                                                                                                                                                                                                                                                                                                                                                                                                                                                                                                                                                                                              | <p>cation binding; metal ion binding; calcium ion binding; binding; ion binding;</p>                                                                                                                                                                                                                                                                                                                                                                                                                                                                                                  | <p>K12758</p> <p>MYLPF; fast skeletal myosin light chain 2</p>                                                                                                                                                                                                                                                                                                                                                                                                                                                                                                                                                | <p>dre04610 Focal adhesion - Danio rerio (zebrafish); dre04530 Tight junction - Danio rerio (zebrafish); dre04810 Regulation of actin cytoskeleton - Danio rerio (zebrafish);</p> | <p>IPR011992; IPR002046;</p> <p>EF-hand domain pair; EF-hand domain;</p>                                                                                                                                                                   |                                                                                                                                                                                |

|        |         |                           |                     |     |   |                              |                       |                                                                                                                                                                                                                                                                                                                                                                                                                                                                                                                                                                                                                                                                                                                                                            |                                                                                                                                                                                                                                                                                                                                                                                                                                                                                                                                                                                                                                                                                                                                                                                         |                                                                   |        |                                               |                                                                                                                                                         |                                                        |                                                                                                                                                                    |
|--------|---------|---------------------------|---------------------|-----|---|------------------------------|-----------------------|------------------------------------------------------------------------------------------------------------------------------------------------------------------------------------------------------------------------------------------------------------------------------------------------------------------------------------------------------------------------------------------------------------------------------------------------------------------------------------------------------------------------------------------------------------------------------------------------------------------------------------------------------------------------------------------------------------------------------------------------------------|-----------------------------------------------------------------------------------------------------------------------------------------------------------------------------------------------------------------------------------------------------------------------------------------------------------------------------------------------------------------------------------------------------------------------------------------------------------------------------------------------------------------------------------------------------------------------------------------------------------------------------------------------------------------------------------------------------------------------------------------------------------------------------------------|-------------------------------------------------------------------|--------|-----------------------------------------------|---------------------------------------------------------------------------------------------------------------------------------------------------------|--------------------------------------------------------|--------------------------------------------------------------------------------------------------------------------------------------------------------------------|
| B3DFP9 | apoa2   | Uncharacterized protein   | _DVVEELK(cr)K_      | 76  | 1 | KDVVEELKKSPRVES              | extracellular         | developmental process; cellular component organization; single-multicellular organism process; morphogenesis of an epithelium; epithelium development; epiboly involved in gastrulation with mouth forming second; tissue development; organelle fission; epiboly; morphogenesis of an epithelial sheet; single-organism process; multicellular organismal process; gastrulation; anatomical structure morphogenesis; gastrulation with mouth forming second; tissue morphogenesis; organelle organization; single-organism developmental process; nuclear division; multicellular organismal development; embryo development; cellular process; anatomical structure development; embryonic morphogenesis; cellular component organization or biogenesis; |                                                                                                                                                                                                                                                                                                                                                                                                                                                                                                                                                                                                                                                                                                                                                                                         |                                                                   |        |                                               |                                                                                                                                                         |                                                        |                                                                                                                                                                    |
| Q90Z10 | rpl13   | 60S ribosomal protein L13 | _EAEQDVVEK(cr)K_    | 209 | 1 | AEQDVVEK_____                | cytosol               | regulation of cellular process; cellular protein metabolic process; biosynthetic process; primary metabolic process; organic substance biosynthetic process; cellular metabolic process; cellular biosynthetic process; organic substance metabolic process; metabolic process; regulation of biological process; cellular macromolecule biosynthetic process; cellular macromolecule metabolic process; gene expression; protein metabolic process; macromolecule metabolic process; translation; macromolecule biosynthetic process; cellular process; regulation of cell cycle; biological regulation;                                                                                                                                                  | ribosome; organelle; intracellular organelle; intracellular non-membrane-bounded organelle; cell part; intracellular; cytoplasm; macromolecular complex; intracellular part; cell; ribonucleoprotein complex; cytoplasmic part; non-membrane-bounded organelle;                                                                                                                                                                                                                                                                                                                                                                                                                                                                                                                         | structural constituent of ribosome; structural molecule activity; | K02873 | RP-L13e; large subunit ribosomal protein L13e | dre03010 Ribosome - Danio rerio (zebrafish);                                                                                                            |                                                        |                                                                                                                                                                    |
| Q6PC90 | rps12   | 40S ribosomal protein S12 | _EAAK(cr)ALDK_      | 40  | 1 | RGIEAAKALDKRQA .....K.L..... | cytosol               | cellular protein metabolic process; biosynthetic process; primary metabolic process; cellular metabolic process; organic substance biosynthetic process; cellular biosynthetic process; organic substance metabolic process; metabolic process; cellular macromolecule biosynthetic process; cellular macromolecule metabolic process; gene expression; macromolecule metabolic process; protein metabolic process; macromolecule biosynthetic process; translation; cellular process;                                                                                                                                                                                                                                                                     | ribosome; organelle; intracellular organelle; intracellular non-membrane-bounded organelle; cell part; intracellular; cytoplasm; macromolecular complex; intracellular part; cell; ribonucleoprotein complex; cytoplasmic part; non-membrane-bounded organelle;                                                                                                                                                                                                                                                                                                                                                                                                                                                                                                                         | structural constituent of ribosome; structural molecule activity; | K02951 | RP-S12e; small subunit ribosomal protein S12e | dre03010 Ribosome - Danio rerio (zebrafish);                                                                                                            | IPR029064; IPR004038;                                  | 50S ribosomal protein L30e-like; Ribosomal protein L7Ae/L30e/S12e/Gad45;                                                                                           |
| Q7T3L3 | hsp90b1 | Chaperone protein GP96    | _EAESSPFVEK(cr)LLK_ | 557 | 1 | ESSPFVEKLLKGYE .....K.L..... | endoplasmic reticulum | developmental process; single-multicellular organism process; response to stress; system development; cellular protein metabolic process; single-organism process; response to stimulus; primary metabolic process; otolith development; inner ear development; cellular metabolic process; multicellular organismal process; organic substance metabolic process; otolith tethering; protein folding; metabolic process; organ development; ear development; single-organism developmental process; cellular macromolecule metabolic process; protein metabolic process; macromolecule metabolic process; multicellular organismal development; sensory organ development; cellular process; anatomical structure development;                            | ATP binding; nucleoside phosphate binding; nucleoside binding; ion binding; nucleotide binding; organic cyclic compound binding; heterocyclic compound binding; ribonucleotide binding; carbohydrate derivative binding; ribonucleotide binding; binding; purine ribonucleoside binding; anion binding; purine ribonucleotide binding; adenylyl ribonucleotide binding; adenylyl nucleotide binding; purine nucleoside binding; purine nucleotide binding; small molecule binding; purine ribonucleoside triphosphate binding;                                                                                                                                                                                                                                                          |                                                                   | K09487 | HSP90B; heat shock protein 90kDa beta         | dre04141 Protein processing in endoplasmic reticulum - Danio rerio (zebrafish); dre04621 NOD-like receptor signaling pathway - Danio rerio (zebrafish); | IPR020568; IPR020575; IPR003594;                       | Ribosomal protein S5 domain 2-type fold; Heat shock protein Hsp90, N-terminal; Histidine kinase-like ATPase, C-terminal domain;                                    |
| Q7ZV05 | rps11   | Ribosomal protein S11     | _EAIDGYDVK(cr)K_    | 59  | 1 | IDGYDVKCPFTGN .....DK.....   | cytosol               | cellular protein metabolic process; biosynthetic process; primary metabolic process; cellular metabolic process; organic substance biosynthetic process; cellular biosynthetic process; organic substance metabolic process; metabolic process; cellular macromolecule biosynthetic process; cellular macromolecule metabolic process; gene expression; macromolecule metabolic process; protein metabolic process; macromolecule biosynthetic process; translation; cellular process;                                                                                                                                                                                                                                                                     | ribosome; organelle; intracellular organelle; intracellular non-membrane-bounded organelle; cell part; intracellular; cytoplasm; macromolecular complex; intracellular part; cell; ribonucleoprotein complex; cytoplasmic part; non-membrane-bounded organelle;                                                                                                                                                                                                                                                                                                                                                                                                                                                                                                                         | structural constituent of ribosome; structural molecule activity; | K02949 | RP-S11e; small subunit ribosomal protein S11e | dre03010 Ribosome - Danio rerio (zebrafish);                                                                                                            | IPR012340;                                             | Nucleic acid-binding, OB-fold;                                                                                                                                     |
| P13104 | tpma    | Uncharacterized protein   | _EAK(cr)HAEEADR_    | 152 | 1 | EIQLEAKHAEEAD .....K.L.....  | cytosol               | cytoskeleton; organelle; intracellular organelle; intracellular non-membrane-bounded organelle; cell part; intracellular; cytoplasm; intracellular part; cell; non-membrane-bounded organelle;                                                                                                                                                                                                                                                                                                                                                                                                                                                                                                                                                             |                                                                                                                                                                                                                                                                                                                                                                                                                                                                                                                                                                                                                                                                                                                                                                                         |                                                                   | K10373 | TPM1; tropomyosin 1                           | dre04261 Adrenergic signaling in cardiomyocytes - Danio rerio (zebrafish);                                                                              |                                                        |                                                                                                                                                                    |
| B8A569 | myh2.13 | Uncharacterized protein   | _EALAK(cr)AEAK_     | 867 | 1 | KCKEALAKAEAKKE .....K.E..... | nuclear               | intracellular organelle; intracellular non-membrane-bounded organelle; cytoskeleton part; intracellular organelle part; macromolecular complex; intracellular part; cell; actin cytoskeleton; organelle part; non-membrane-bounded organelle; organelle; cytoskeleton; cell part; intracellular; myosin complex; protein complex;                                                                                                                                                                                                                                                                                                                                                                                                                          | ATP binding; motor activity; nucleoside phosphate binding; nucleoside binding; ion binding; hydrolase activity; acting on acid anhydrides; hydrolase activity; nucleotide binding; nucleoside-triphosphatase activity; organic cyclic compound binding; heterocyclic compound binding; ribonucleoside binding; carbohydrate derivative binding; pyrophosphatase activity; catalytic activity; ribonucleotide binding; binding; purine ribonucleoside binding; anion binding; purine ribonucleotide binding; adenylyl ribonucleotide binding; adenylyl nucleotide binding; purine nucleoside binding; hydrolase activity; acting on acid anhydrides, in phosphorus-containing anhydrides; purine nucleotide binding; small molecule binding; purine ribonucleoside triphosphate binding; |                                                                   |        |                                               |                                                                                                                                                         | IPR002928; IPR004009; IPR027417; IPR001609; IPR027401; | Myosin tail; Myosin, N-terminal, SH3-like; P-loop containing nucleoside triphosphate hydrolase; Myosin head, motor domain; Myosin-like IQ motif-containing domain; |

|        |          |                                                   |                          |      |   |                 |               |                       |                                                                                                                                                                                                                                                                                                                |        |                                       |                                                                                                                                                                                                                                            |                                                                                                                                                                                                                                                                                                                                |
|--------|----------|---------------------------------------------------|--------------------------|------|---|-----------------|---------------|-----------------------|----------------------------------------------------------------------------------------------------------------------------------------------------------------------------------------------------------------------------------------------------------------------------------------------------------------|--------|---------------------------------------|--------------------------------------------------------------------------------------------------------------------------------------------------------------------------------------------------------------------------------------------|--------------------------------------------------------------------------------------------------------------------------------------------------------------------------------------------------------------------------------------------------------------------------------------------------------------------------------|
| F1R0W9 | dctn1a   | Uncharacterized protein                           | _EALEAK(cr)DR_           | 239  | 1 | AREALEAKDRYMEEM | ..E...K.....  | cytosol               |                                                                                                                                                                                                                                                                                                                | K04648 | IPR000938;<br>IPR022157;              | CAP Gly-rich domain; Dynein associated protein;                                                                                                                                                                                            |                                                                                                                                                                                                                                                                                                                                |
| Q6IQX1 | myh2     | Myosin, heavy polypeptide 2, fast muscle specific | _EDDVHPM(cr)NPPK(cr)FDK_ | 85   | 1 | VHPMNPVKFDKIDEM |               | cytosol               | response to stress; response to stimulus;                                                                                                                                                                                                                                                                      | K10352 | MYH;<br>myosin heavy chain            | dre04530 Tight junction - Danio rerio (zebrafish);                                                                                                                                                                                         | Myosin tail; Myosin, N-terminal, SH3-like; Myosin head, motor domain; P-loop containing nucleoside triphosphate hydrolase; Myosin-like IQ motif-containing domain;                                                                                                                                                             |
| B8A568 | myh2.1   | Uncharacterized protein                           | _EDFVK(cr)CK_            | 860  | 1 | TMKEDFVKCKEDLAK |               | nuclear               |                                                                                                                                                                                                                                                                                                                | K10352 | MYH;<br>myosin heavy chain            | dre04530 Tight junction - Danio rerio (zebrafish);                                                                                                                                                                                         | Myosin tail; Myosin, N-terminal, SH3-like; Myosin head, motor domain; P-loop containing nucleoside triphosphate hydrolase; Myosin-like IQ motif-containing domain;                                                                                                                                                             |
| Q6P0W3 | tpm3     | Uncharacterized protein                           | _EDKYEEIEK(cr)LLTDK_     | 226  | 1 | DKYEEIEKILTDK   | .....K.L..... | cytosol               |                                                                                                                                                                                                                                                                                                                |        |                                       |                                                                                                                                                                                                                                            |                                                                                                                                                                                                                                                                                                                                |
| P13104 | tpma     | Uncharacterized protein                           | _EDKYEEIEK(cr)VLTDK_     | 226  | 1 | DKYEEIEKVLTDK   | .....K.L..... | cytosol               |                                                                                                                                                                                                                                                                                                                | K10373 | TPM1; tropomyosin 1                   | dre04262 Carabid muscle contraction - Danio rerio (zebrafish); dre04261 Adrenergic signalling in cardiomyocytes - Danio rerio (zebrafish);                                                                                                 |                                                                                                                                                                                                                                                                                                                                |
| B8A568 | myh2.1   | Uncharacterized protein                           | _EDLAK(cr)AEAK_          | 867  | 1 | KCKEDLAKAEAKKE  | .....K.E..... | nuclear               |                                                                                                                                                                                                                                                                                                                | K10352 | MYH;<br>myosin heavy chain            | dre04530 Tight junction - Danio rerio (zebrafish);                                                                                                                                                                                         | Myosin tail; Myosin, N-terminal, SH3-like; Myosin head, motor domain; P-loop containing nucleoside triphosphate hydrolase; Myosin-like IQ motif-containing domain;                                                                                                                                                             |
| B8A561 | myh2.1.2 | Uncharacterized protein                           | _EDLAK(cr)AEAK_          | 867  | 1 | KCKEDLAKAEAKKE  | .....K.E..... | nuclear               |                                                                                                                                                                                                                                                                                                                | K10352 | MYH;<br>myosin heavy chain            | dre04530 Tight junction - Danio rerio (zebrafish);                                                                                                                                                                                         | Myosin tail; Myosin, N-terminal, SH3-like; Myosin head, motor domain; P-loop containing nucleoside triphosphate hydrolase; Myosin-like IQ motif-containing domain;                                                                                                                                                             |
| E7EXP0 | hnt3b    | Uncharacterized protein                           | _EEEEIALK(cr)DR_         | 72   | 1 | EEELIALKDRIKRR  | ..E...K.....  | nuclear               |                                                                                                                                                                                                                                                                                                                | K12046 |                                       |                                                                                                                                                                                                                                            |                                                                                                                                                                                                                                                                                                                                |
| Q6NYR4 | hspa8    | Heat shock cognate 71 kDa protein                 | _EEFEHQOK(cr)ELEK_       | 597  | 1 | EEFEHQOKELEKVCN | .....K.L..... | cytosol               | response to stress; response to stimulus;                                                                                                                                                                                                                                                                      | K03283 | HSPA1_8; heat shock 70kDa protein 1/8 | dre04010 MAPK signaling pathway - Danio rerio (zebrafish); dre04141 Protein processing in endoplasmic reticulum - Danio rerio (zebrafish); dre04144 Endocytosis - Danio rerio (zebrafish); dre03040 Spliceosome - Danio rerio (zebrafish); | Heat shock protein 70kD, C-terminal domain; Heat shock protein 70kD, peptide-binding domain;                                                                                                                                                                                                                                   |
| Q90473 | hspa8    | Heat shock cognate 71 kDa protein                 | _EEFEHQOK(cr)ELEK_       | 597  | 1 | EEFEHQOKELEKVCN | .....K.L..... | cytosol               | developmental process; response to wounding; tissue development; response to stress; wound healing; tissue regeneration; single-organism developmental process; fin regeneration; single-organism process; regeneration; developmental growth; response to stimulus; growth; anatomical structure development; | K03283 | HSPA1_8; heat shock 70kDa protein 1/8 | dre04010 MAPK signaling pathway - Danio rerio (zebrafish); dre04141 Protein processing in endoplasmic reticulum - Danio rerio (zebrafish); dre04144 Endocytosis - Danio rerio (zebrafish); dre03040 Spliceosome - Danio rerio (zebrafish); | Heat shock protein 70kD, C-terminal domain; Heat shock protein 70kD, peptide-binding domain;                                                                                                                                                                                                                                   |
| Q5T2Z9 | apob.1   | Uncharacterized protein                           | _EEIQK(cr)FLK_           | 2362 | 1 | DIREEQKFLKHASS  | .....K.L..... | endoplasmic reticulum | response to chemical; response to stimulus;                                                                                                                                                                                                                                                                    |        |                                       |                                                                                                                                                                                                                                            | Vitellogenin, superhelical; Vitellinogen, open beta-sheet, subdomain 1; Vitellinogen, open beta-sheet, subdomain 2; Lipid transport protein, N-terminal; Lipid transport protein, beta-sheet shell; Vitellinogen, beta-sheet N-terminal; Armadillo-type fold; Vitellinogen, open beta-sheet; Lipid transport, open beta-sheet; |

|        |          |                                            |                             |     |   |                 |               |                       |                                                                                                                                                                                                                                                                                                                                                                                                                                                                                                                                                                                                                                                                                                                                                                                                                                                                                                                    |                                                                                                                                                                                                                                                                                                                                                                                                                                                                                                                                                                                                                                                                 |        |                                                     |                                                                                                                                                         |                                                                                                                                                                                                                                                                                                                                                                                                                                                        |                                                                                                                                                                    |
|--------|----------|--------------------------------------------|-----------------------------|-----|---|-----------------|---------------|-----------------------|--------------------------------------------------------------------------------------------------------------------------------------------------------------------------------------------------------------------------------------------------------------------------------------------------------------------------------------------------------------------------------------------------------------------------------------------------------------------------------------------------------------------------------------------------------------------------------------------------------------------------------------------------------------------------------------------------------------------------------------------------------------------------------------------------------------------------------------------------------------------------------------------------------------------|-----------------------------------------------------------------------------------------------------------------------------------------------------------------------------------------------------------------------------------------------------------------------------------------------------------------------------------------------------------------------------------------------------------------------------------------------------------------------------------------------------------------------------------------------------------------------------------------------------------------------------------------------------------------|--------|-----------------------------------------------------|---------------------------------------------------------------------------------------------------------------------------------------------------------|--------------------------------------------------------------------------------------------------------------------------------------------------------------------------------------------------------------------------------------------------------------------------------------------------------------------------------------------------------------------------------------------------------------------------------------------------------|--------------------------------------------------------------------------------------------------------------------------------------------------------------------|
| B8A568 | myh2.1.1 | Uncharacterized protein                    | ..EEK(cr)VKEDDVHPM(ax)NPPK_ | 71  | 1 | TLDTKEEKVKVEDDV | .....K.V..... | nuclear               | intracellular organelle; intracellular non-membrane-bounded organelle; cytoskeletal part; intracellular organelle part; macromolecular complex; intracellular part; cell; actin cytoskeleton; organelle part; non-membrane-bounded organelle; organelle; cytoskeleton; cell part; intracellular; myosin complex; protein complex;                                                                                                                                                                                                                                                                                                                                                                                                                                                                                                                                                                                  | ATP binding; motor activity; nucleoside phosphate binding; nucleoside binding; ion binding; hydrolase activity, acting on acid anhydrides; hydrolase activity; nucleotide binding; nucleoside-triphosphatase activity; organic cyclic compound binding; heterocyclic compound binding; ribonucleoside binding; carbohydrate derivative binding; pyrophosphatase activity; catalytic activity; ribonucleotide binding; binding; purine ribonucleoside binding; anion binding; hydrolase activity, acting on acid anhydrides; in phosphorus-containing anhydrides; purine nucleotide binding; small molecule binding; purine ribonucleoside triphosphate binding; | K10352 | MYH; myosin heavy chain                             | dre04630 Tight Junction - Danio rerio (zebrafish);                                                                                                      | IPR002928; IPR004009; IPR001609; IPR027417; IPR027401;                                                                                                                                                                                                                                                                                                                                                                                                 | Myosin tail; Myosin, N-terminal, SH3-like; Myosin head, motor domain; P-loop containing nucleoside triphosphate hydrolase; Myosin-like IQ motif-containing domain; |
| Q6TGv6 | psma5    | Proteasome subunit alpha type              | ..ELEDVVK(cr)DL_            | 239 | 1 | ELEDVVKD(____   |               | cytosol,nuclear       | intracellular organelle; proteasome core complex; alpha-subunit complex; proteasome complex; cytoplasm; macromolecular complex; intracellular part; cell; intracellular membrane-bounded organelle; organelle; nucleus; intracellular; cell part; proteasome core complex; membrane-bounded organelle; protein complex;                                                                                                                                                                                                                                                                                                                                                                                                                                                                                                                                                                                            | endopeptidase activity; threonine-type endopeptidase activity; peptidase activity; catalytic activity; threonine-type peptidase activity; peptidase activity, acting on L-amino acid peptides; hydrolase activity;                                                                                                                                                                                                                                                                                                                                                                                                                                              | K02729 | PSMA5; 20S proteasome subunit alpha 5 [EC:3.4.25.1] | dre03050 Proteasome - Danio rerio (zebrafish);                                                                                                          | IPR000426; IPR029055;                                                                                                                                                                                                                                                                                                                                                                                                                                  | Proteasome alpha-subunit, N-terminal domain; Nucleophile aminohydrolases, N-terminal;                                                                              |
| E9QDY3 | cyt1     | Uncharacterized protein                    | ..EELFLK(cr)K_              | 238 | 1 | KEELFLKKNHEEL   | ..E...K.....  | mitochondria          | intracellular organelle; intracellular non-membrane-bounded organelle; cytoskeletal part; intracellular organelle part; macromolecular complex; intracellular part; cell; organelle part; non-membrane-bounded organelle; organelle; cytoskeleton; intermediate filament; cytoskeleton; cell part; intracellular; intermediate filament; protein complex;                                                                                                                                                                                                                                                                                                                                                                                                                                                                                                                                                          | structural molecule activity;                                                                                                                                                                                                                                                                                                                                                                                                                                                                                                                                                                                                                                   | K07604 |                                                     |                                                                                                                                                         |                                                                                                                                                                                                                                                                                                                                                                                                                                                        |                                                                                                                                                                    |
| Q7T3L3 | hsp90b1  | Chaperone protein GP96                     | ..EELVK(cr)NLGTIAK_         | 161 | 1 | MTKEELVKNLGTIAK | .....K.L..... | endoplasmic reticulum | developmental process; single-multicellular organism process; response to stress; system development; cellular protein metabolic process; single-organism process; response to stimulus; primary metabolic process; otolith development; inner ear development; cellular metabolic process; multicellular organismal process; organic substance metabolic process; otolith tethering; protein folding; metabolic process; organ development; ear development; single-organism developmental process; cellular macromolecule metabolic process; protein metabolic process; macromolecule metabolic process; multicellular organismal development; sensory organ development; cellular process; anatomical structure development;                                                                                                                                                                                    | ATP binding; nucleoside phosphate binding; nucleoside binding; ion binding; nucleotide binding; organic cyclic compound binding; heterocyclic compound binding; ribonucleoside binding; carbohydrate derivative binding; ribonucleotide binding; binding; purine ribonucleoside binding; anion binding; purine ribonucleoside binding; adenylyl ribonucleotide binding; adenylyl nucleotide binding; purine nucleoside binding; purine nucleotide binding; small molecule binding; purine ribonucleoside triphosphate binding;                                                                                                                                  | K09487 | HSP90B; heat shock protein 90Da beta                | dre04141 Protein processing in endoplasmic reticulum - Danio rerio (zebrafish); dre04621 NOD-like receptor signaling pathway - Danio rerio (zebrafish); | IPR020568; IPR020575; IPR003594;                                                                                                                                                                                                                                                                                                                                                                                                                       | Ribosomal protein S5 domain 2-type fold; Heat shock protein Hsp90, N-terminal; Histidine kinase-like ATPase, C-terminal domain;                                    |
| Q6PJ5  | eef2b    | Eukaryotic translation elongation factor 2 | ..EETAK(cr)LIEK_            | 314 | 1 | FKKEETAKLIEKLDI | .....K.L..... | cytosol               | nucleoside phosphate binding; translation elongation factor activity; hydrolase activity, acting on acid anhydrides; hydrolase activity; organic cyclic compound binding; heterocyclic compound binding; pyrophosphatase activity; catalytic activity; ribonucleotide binding; binding; GTPase activity; purine ribonucleoside binding; anion binding; hydrolase activity, acting on acid anhydrides; in phosphorus-containing anhydrides; guanyl nucleotide binding; GTP binding; purine nucleotide binding; purine ribonucleoside triphosphate binding; RNA binding; ion binding; nucleoside binding; nucleotide binding; nucleoside-triphosphatase activity; ribonucleoside binding; translation factor activity, nucleic acid binding; carbohydrate derivative binding; nucleic acid binding; purine ribonucleoside binding; guanyl ribonucleotide binding; purine nucleoside binding; small molecule binding; |                                                                                                                                                                                                                                                                                                                                                                                                                                                                                                                                                                                                                                                                 | K03234 |                                                     | IPR027417; IPR000795; IPR005517; IPR005225; IPR004161; IPR008640; IPR020568; IPR014721; IPR009022; IPR009000;                                           | P-loop containing nucleoside triphosphate hydrolase; Elongation factor, GTP-binding domain; Translation elongation factor EFG,EF2, domain IV; Small GTP-binding protein domain; Translation elongation factor EFTu/EF1A, domain 2; Translation elongation factor EFG, V domain; Ribosomal protein S5 domain 2-type fold; Ribosomal protein S5 domain 2-type fold, subgroup; Elongation factor G, II-V domain; Translation protein, beta-barrel domain; |                                                                                                                                                                    |
| E9QFX0 | apoc1    | Uncharacterized protein                    | ..EIAEDLADK(cr)TK_          | 47  | 1 | IAEDLADKTKTAFQN | .....DK.....  | extracellular         | extracellular region;                                                                                                                                                                                                                                                                                                                                                                                                                                                                                                                                                                                                                                                                                                                                                                                                                                                                                              |                                                                                                                                                                                                                                                                                                                                                                                                                                                                                                                                                                                                                                                                 |        |                                                     |                                                                                                                                                         |                                                                                                                                                                                                                                                                                                                                                                                                                                                        |                                                                                                                                                                    |
| A2BFV8 | anxa1a   | Annexin                                    | ..EIGDK(cr)QVYK_            | 148 | 1 | NKEIGDKQVYKOEY  | .....K.V..... | cytosol               |                                                                                                                                                                                                                                                                                                                                                                                                                                                                                                                                                                                                                                                                                                                                                                                                                                                                                                                    | calcium-dependent phospholipid binding; binding; phospholipid binding; ion binding; lipid binding; metal ion binding; cation binding; anion binding; calcium ion binding;                                                                                                                                                                                                                                                                                                                                                                                                                                                                                       |        |                                                     |                                                                                                                                                         |                                                                                                                                                                                                                                                                                                                                                                                                                                                        |                                                                                                                                                                    |

|        |         |                             |                           |      |   |                 |                   |                  |                                                                                                                                                                                                                                                                                                                                                                                                                                                                                                                                                                                                                                                                                                                                                                                                                                                                                                                                                                                                                                                                                                                                                                                                                                                                                                                                                                                                                                                                                                                                                                                               |                                                                                           |                                                                                                                                                                                                                                                                                                                                                                                                                                                                                                                                                                                                                                                                                                                                                                                                                                                                                                                                                                                                                                                                                                                                                                                                                                                                                                                                                                                                                                                                                                                                                                                                                                                                                                                                                                                                                                                                                                                                      |        |                                                                       |                                                                                                                                                                                                                                     |                                                                   |                                                                                                                                                                                                                   |
|--------|---------|-----------------------------|---------------------------|------|---|-----------------|-------------------|------------------|-----------------------------------------------------------------------------------------------------------------------------------------------------------------------------------------------------------------------------------------------------------------------------------------------------------------------------------------------------------------------------------------------------------------------------------------------------------------------------------------------------------------------------------------------------------------------------------------------------------------------------------------------------------------------------------------------------------------------------------------------------------------------------------------------------------------------------------------------------------------------------------------------------------------------------------------------------------------------------------------------------------------------------------------------------------------------------------------------------------------------------------------------------------------------------------------------------------------------------------------------------------------------------------------------------------------------------------------------------------------------------------------------------------------------------------------------------------------------------------------------------------------------------------------------------------------------------------------------|-------------------------------------------------------------------------------------------|--------------------------------------------------------------------------------------------------------------------------------------------------------------------------------------------------------------------------------------------------------------------------------------------------------------------------------------------------------------------------------------------------------------------------------------------------------------------------------------------------------------------------------------------------------------------------------------------------------------------------------------------------------------------------------------------------------------------------------------------------------------------------------------------------------------------------------------------------------------------------------------------------------------------------------------------------------------------------------------------------------------------------------------------------------------------------------------------------------------------------------------------------------------------------------------------------------------------------------------------------------------------------------------------------------------------------------------------------------------------------------------------------------------------------------------------------------------------------------------------------------------------------------------------------------------------------------------------------------------------------------------------------------------------------------------------------------------------------------------------------------------------------------------------------------------------------------------------------------------------------------------------------------------------------------------|--------|-----------------------------------------------------------------------|-------------------------------------------------------------------------------------------------------------------------------------------------------------------------------------------------------------------------------------|-------------------------------------------------------------------|-------------------------------------------------------------------------------------------------------------------------------------------------------------------------------------------------------------------|
| Q64220 | atp2a1  | Calcium-transporting ATPase | E1VPGDIVEVSGDK(cr)VPADIR_ | 158  | 1 | VEVSVGDKVPADIRI | .....DK.....      | plasma membrane  | nucleoside metabolic process; purine nucleoside metabolic process; purine ribonucleoside monophosphate metabolic process; nucleotide metabolic process; single-organism process; purine ribonucleoside biosynthetic process; nucleoside biosynthetic process; biosynthetic process; ribonucleoside monophosphate biosynthetic process; cellular metabolic process; phosphate-containing compound metabolic process; ribose phosphate biosynthetic process; metabolic process; carbohydrate derivative biosynthetic process; nucleoside phosphate metabolic process; ribose phosphate metabolic process; purine nucleoside triphosphate biosynthetic process; heterocyclic biosynthetic process; purine ribonucleoside triphosphate biosynthetic process; small molecule metabolic process; ATP biosynthetic process; single-organism cellular process; purine ribonucleoside triphosphate metabolic process; organic cyclic compound metabolic process; purine-containing compound metabolic process; ribonucleoside triphosphate metabolic process; purine ribonucleoside monophosphate biosynthetic process; purine nucleoside biosynthetic process; organophosphate biosynthetic process; ribonucleoside monophosphate                                                                                                                                                                                                                                                                                                                                                                     | intrinsic component of membrane; membrane; integral component of membrane; membrane part; | ATPase activity, coupled to transmembrane movement of ions; nucleoside phosphate binding; primary active transmembrane transporter activity; substrate-specific transporter activity; hydrolase activity, acting on acid anhydrides; hydrolase activity; substrate-specific transmembrane transporter activity; ATPase activity; organic cyclic compound binding; heterocyclic compound binding; metal ion transmembrane transporter activity; pyrophosphatase activity; cation-transporting ATPase activity; catalytic activity; ribonucleotide binding; ATPase activity; coupled to movement of substances; binding; purine ribonucleoside binding; cation binding; hydrolase activity, acting on acid anhydrides, catalyzing transmembrane movement of substances; anion binding; adenylyl ribonucleotide binding; adenylyl nucleotide binding; inorganic cation transmembrane transporter activity; hydrolase activity, acting on acid anhydrides, in phosphorus-containing anhydrides; transporter activity; purine nucleotide binding; purine ribonucleoside triphosphate binding; active transmembrane transporter activity; ATP binding; ion transmembrane transporter activity; ion binding; nucleoside binding; nucleotide binding; nucleoside-triphosphatase activity; ribonucleoside binding; P-P-bond-hydrolysis-driven transmembrane transporter activity; ATPase activity, coupled to transmembrane movement of ions, phosphorylative mechanism; divalent inorganic cation transmembrane transporter activity; carbohydrate derivative binding; calcium-transporting ATPase activity; ATPase activity, coupled to transmembrane movement of substances; ATPase activity, coupled, metal ion binding; calcium ion transmembrane transporter activity; purine ribonucleotide binding; purine nucleoside binding; cation transmembrane transporter activity; transmembrane transporter activity; small molecule binding; | K05853 | ATP2A; Ca2+ transportin g ATPase, sarcoplasmic reticulum [EC:3.6.3.8] | dre04020 Calcium signaling pathway - Danio rerio (zebrafish);                                                                                                                                                                       | IPR023298; IPR004014; IPR023299; IPR006250; IPR006068; IPR023214; | P-type ATPase, transmembrane domain; Cation-transporting P-type ATPase, N-terminal; P-type ATPase; cytoplasmic domain N; P-type ATPase, A domain; Cation-transporting P-type ATPase, C-terminal; HAD-like domain; |
| B0S758 | tna     | Uncharacterized protein     | _EK(cr)ELESORPEGEIVGR_    | 7294 | 1 | IEFLKKEKELESGRP | .....K.L.....     | cytosol,nucle ar |                                                                                                                                                                                                                                                                                                                                                                                                                                                                                                                                                                                                                                                                                                                                                                                                                                                                                                                                                                                                                                                                                                                                                                                                                                                                                                                                                                                                                                                                                                                                                                                               |                                                                                           |                                                                                                                                                                                                                                                                                                                                                                                                                                                                                                                                                                                                                                                                                                                                                                                                                                                                                                                                                                                                                                                                                                                                                                                                                                                                                                                                                                                                                                                                                                                                                                                                                                                                                                                                                                                                                                                                                                                                      |        |                                                                       |                                                                                                                                                                                                                                     |                                                                   | Immunoglobulin subtype 2; Immunoglobulin-like domain; Immunoglobulin-like fold; Immunoglobulin subtype; Immunoglobulin I-set;                                                                                     |
| B8ASD3 | nars    | Uncharacterized protein     | _EK(cr)NLEEA_K_           | 101  | 1 | EDAERREKNLEEAKK | .....K.L.....     | cytosol          | cellular aromatic compound metabolic process; cellular protein metabolic process; single-organism process; biosynthetic process; asparaginyl-tRNA aminoacylation; tRNA aminoacylation; cellular metabolic process; organic substance metabolic process; metabolic process; cellular amino acid metabolic process; heterocycle metabolic process; nucleoside-containing compound metabolic process; cellular nitrogen compound metabolic process; protein metabolic process; macromolecule metabolic process; RNA aminoacylation for protein translation; macromolecule biosynthetic process; translation; cellular process; small molecule metabolic process; single-organism cellular process; nitrogen compound metabolic process; organic cyclic compound metabolic process; primary metabolic process; organic substance biosynthetic process; cellular biosynthetic process; RNA metabolic process; tRNA metabolic process; cellular macromolecule biosynthetic process; single-organism metabolic process; amino acid activation; cellular macromolecule metabolic process; carboxylic acid metabolic process; gene expression; organic acid metabolic process; ncRNA metabolic process; oxoacid metabolic process; oxoacid biosynthetic process; protein folding; metabolic process; response to stress; cellular protein metabolic process; cellular macromolecule metabolic process; macromolecule metabolic process; protein metabolic process; response to stimulus; primary metabolic process; cellular process; cellular metabolic process; organic substance metabolic process; | intracellular part; cell; cell part; intracellular cytoplasm;                             | ligase activity, forming aminoacyl-tRNA and related compounds; ATP binding; nucleoside phosphate binding; ligase activity forming carbon-oxygen bonds; nucleoside binding; ion binding; ligase activity; nucleotide binding; organic cyclic compound binding; heterocyclic compound binding; ribonucleoside binding; carbohydrate derivative binding; ribonucleotide binding; catalytic activity; binding; nucleic acid binding; purine ribonucleoside binding; purine ribonucleotide binding; anion binding; adenylyl ribonucleotide binding; adenylyl nucleotide binding; purine nucleoside binding; asparagine-tRNA ligase activity; aminoacyl-tRNA ligase activity; purine nucleotide binding; small molecule binding; purine ribonucleoside triphosphate binding;                                                                                                                                                                                                                                                                                                                                                                                                                                                                                                                                                                                                                                                                                                                                                                                                                                                                                                                                                                                                                                                                                                                                                               | K01893 | NARS; asparaginyl-tRNA synthetase [EC:6.1.1.22]                       | dre00970 Aminoacyl-tRNA biosynthesis - Danio rerio (zebrafish);                                                                                                                                                                     | IPR012340; IPR004364; IPR004365; IPR006195;                       | Nucleic acid-binding, OB-fold; Aminoacyl-tRNA synthetase, class II (D/KN); OB-fold nucleic acid binding domain; AA-tRNA synthetase-type; Aminoacyl-tRNA synthetase, class II;                                     |
| E7E216 | -       | Uncharacterized protein     | _EK(cr)YDQEELNK_          | 259  | 1 | KKKKYKQYDQEEEL  | .....K.L.....     | cytosol          | protein folding; metabolic process; response to stress; cellular protein metabolic process; cellular macromolecule metabolic process; macromolecule metabolic process; protein metabolic process; response to stimulus; primary metabolic process; cellular process; cellular metabolic process; organic substance metabolic process;                                                                                                                                                                                                                                                                                                                                                                                                                                                                                                                                                                                                                                                                                                                                                                                                                                                                                                                                                                                                                                                                                                                                                                                                                                                         |                                                                                           | ATP binding; nucleoside phosphate binding; nucleoside binding; ion binding; nucleotide binding; organic cyclic compound binding; heterocyclic compound binding; ribonucleoside binding; carbohydrate derivative binding; ribonucleotide binding; binding; purine ribonucleotide binding; anion binding; purine ribonucleotide binding; adenylyl ribonucleotide binding; adenylyl nucleotide binding; purine nucleoside binding; purine nucleotide binding; small molecule binding; purine ribonucleoside triphosphate binding;                                                                                                                                                                                                                                                                                                                                                                                                                                                                                                                                                                                                                                                                                                                                                                                                                                                                                                                                                                                                                                                                                                                                                                                                                                                                                                                                                                                                       | K04079 | hPg; molecular chaperone Hpg                                          | dre04014 Progesterone-mediated oocyte maturation - Danio rerio (zebrafish); dre04141 Protein processing in endoplasmic reticulum - Danio rerio (zebrafish); dre04621 NOD-like receptor signaling pathway - Danio rerio (zebrafish); | IPR020568; IPR003594;                                             | Ribosomal protein S5 domain 2-type fold; Heat shock protein Hsp90, N-terminal; Histidine kinase-like ATPase, C-terminal domain;                                                                                   |
| B8A568 | myhz1.1 | Uncharacterized protein     | _ELATMK(cr)EDPVK_         | 855  | 1 | EKELATMKEDPVKCK | .....E.....K..... | nuclear          | intracellular organelle; intracellular non-membrane-bounded organelle; cytoskeleton part; intracellular organelle part; macromolecular complex; intracellular part; cell; actin cytoskeleton; organelle part; non-membrane-bounded organelle; organelle; cytoskeleton; cell part; intracellular; myosin complex; protein complex;                                                                                                                                                                                                                                                                                                                                                                                                                                                                                                                                                                                                                                                                                                                                                                                                                                                                                                                                                                                                                                                                                                                                                                                                                                                             |                                                                                           | ATP binding; motor activity; nucleoside phosphate binding; nucleoside binding; ion binding; hydrolase activity, acting on acid anhydrides; hydrolase activity; nucleotide binding; nucleoside-triphosphatase activity; organic cyclic compound binding; heterocyclic compound binding; ribonucleoside binding; carbohydrate derivative binding; pyrophosphatase activity; catalytic activity; ribonucleotide binding; binding; purine ribonucleoside binding; anion binding; purine ribonucleotide binding; adenylyl ribonucleotide binding; adenylyl nucleotide binding; purine nucleoside binding; hydrolase activity, acting on acid anhydrides, in phosphorus-containing anhydrides; purine nucleotide binding; small molecule binding; purine ribonucleoside triphosphate binding;                                                                                                                                                                                                                                                                                                                                                                                                                                                                                                                                                                                                                                                                                                                                                                                                                                                                                                                                                                                                                                                                                                                                              | K10352 | MYH; myosin heavy chain                                               | dre04530 Tight junction - Danio rerio (zebrafish);                                                                                                                                                                                  | IPR002928; IPR004009; IPR001609; IPR027417; IPR027411;            | Myosin tail; Myosin, N-terminal, SH3-like; Myosin head, motor domain, p-loop containing nucleoside triphosphate hydrolase; Myosin-like IQ motif-containing domain;                                                |

|        |          |                                                               |                         |      |   |                 |                   |               |                                                                                                                                                                                                                                                                                                                                                                                                                       |                                                                                                                                                                                                                                                                                                                                                                                                                                                                                                                                                                                                                                                                                                                                                                                         |        |                         |                                                    |                                                        |                                                                                                                                                                    |                                              |
|--------|----------|---------------------------------------------------------------|-------------------------|------|---|-----------------|-------------------|---------------|-----------------------------------------------------------------------------------------------------------------------------------------------------------------------------------------------------------------------------------------------------------------------------------------------------------------------------------------------------------------------------------------------------------------------|-----------------------------------------------------------------------------------------------------------------------------------------------------------------------------------------------------------------------------------------------------------------------------------------------------------------------------------------------------------------------------------------------------------------------------------------------------------------------------------------------------------------------------------------------------------------------------------------------------------------------------------------------------------------------------------------------------------------------------------------------------------------------------------------|--------|-------------------------|----------------------------------------------------|--------------------------------------------------------|--------------------------------------------------------------------------------------------------------------------------------------------------------------------|----------------------------------------------|
| B8A561 | myh2.1.2 | Uncharacterized protein                                       | _ELATMK(cr)EDPVK_       | 855  | 1 | EKELATMKEDPVCK  | .....E.....K..... | nuclear       | intracellular organelle; intracellular non-membrane-bounded organelle; cytoskeleton part; intracellular organelle part; macromolecular complex; intracellular part; cell; actin cytoskeleton; organelle part; non-membrane-bounded organelle; organelle; cytoskeleton; cell part; intracellular; myosin complex; protein complex;                                                                                     | ATP binding; motor activity; nucleoside phosphate binding; nucleoside binding; ion binding; hydrolase activity, acting on acid anhydrides; hydrolase activity; nucleotide binding; nucleoside-triphosphatase activity; organic cyclic compound binding; heterocyclic compound binding; ribonucleoside binding; carbohydrate derivative binding; pyrophosphatase activity; catalytic activity; ribonucleotide binding; binding; purine ribonucleoside binding; anion binding; purine ribonucleotide binding; adenylyl ribonucleotide binding; adenylyl nucleotide binding; purine nucleoside binding; hydrolase activity, acting on acid anhydrides, in phosphorus-containing anhydrides; purine nucleotide binding; small molecule binding; purine ribonucleoside triphosphate binding; | K10352 | MYH; myosin heavy chain | dre04530 Tight junction - Danio rerio (zebrafish); | IPR002928; IPR004009; IPR001609; IPR027417; IPR027401; | Myosin tail; Myosin, N-terminal, SH3-like; Myosin head, motor domain; P-loop containing nucleoside triphosphate hydrolase; Myosin-like IQ motif-containing domain; |                                              |
| B8A568 | myh2.1.1 | Uncharacterized protein                                       | _ELEEK(cr)MVALLOEK_     | 878  | 1 | KKKELEEKMVALLOE | .....K.V.....     | nuclear       | intracellular organelle; intracellular non-membrane-bounded organelle; cytoskeleton part; intracellular organelle part; macromolecular complex; intracellular part; cell; actin cytoskeleton; organelle part; non-membrane-bounded organelle; organelle; cytoskeleton; cell part; intracellular; myosin complex; protein complex;                                                                                     | ATP binding; motor activity; nucleoside phosphate binding; nucleoside binding; ion binding; hydrolase activity, acting on acid anhydrides; hydrolase activity; nucleotide binding; nucleoside-triphosphatase activity; organic cyclic compound binding; heterocyclic compound binding; ribonucleoside binding; carbohydrate derivative binding; pyrophosphatase activity; catalytic activity; ribonucleotide binding; binding; purine ribonucleoside binding; anion binding; purine ribonucleotide binding; adenylyl ribonucleotide binding; adenylyl nucleotide binding; purine nucleoside binding; hydrolase activity, acting on acid anhydrides, in phosphorus-containing anhydrides; purine nucleotide binding; small molecule binding; purine ribonucleoside triphosphate binding; | K10352 | MYH; myosin heavy chain | dre04530 Tight junction - Danio rerio (zebrafish); | IPR002928; IPR004009; IPR001609; IPR027417; IPR027401; | Myosin tail; Myosin, N-terminal, SH3-like; Myosin head, motor domain; P-loop containing nucleoside triphosphate hydrolase; Myosin-like IQ motif-containing domain; |                                              |
| B8A561 | myh2.1.2 | Uncharacterized protein                                       | _ELEEK(cr)MVALLOEK_     | 878  | 1 | KKKELEEKMVALLOE | .....K.V.....     | nuclear       | intracellular organelle; intracellular non-membrane-bounded organelle; cytoskeleton part; intracellular organelle part; macromolecular complex; intracellular part; cell; actin cytoskeleton; organelle part; non-membrane-bounded organelle; organelle; cytoskeleton; cell part; intracellular; myosin complex; protein complex;                                                                                     | ATP binding; motor activity; nucleoside phosphate binding; nucleoside binding; ion binding; hydrolase activity, acting on acid anhydrides; hydrolase activity; nucleotide binding; nucleoside-triphosphatase activity; organic cyclic compound binding; heterocyclic compound binding; ribonucleoside binding; carbohydrate derivative binding; pyrophosphatase activity; catalytic activity; ribonucleotide binding; binding; purine ribonucleoside binding; anion binding; purine ribonucleotide binding; adenylyl ribonucleotide binding; adenylyl nucleotide binding; purine nucleoside binding; hydrolase activity, acting on acid anhydrides, in phosphorus-containing anhydrides; purine nucleotide binding; small molecule binding; purine ribonucleoside triphosphate binding; | K10352 | MYH; myosin heavy chain | dre04530 Tight junction - Danio rerio (zebrafish); | IPR002928; IPR004009; IPR001609; IPR027417; IPR027401; | Myosin tail; Myosin, N-terminal, SH3-like; Myosin head, motor domain; P-loop containing nucleoside triphosphate hydrolase; Myosin-like IQ motif-containing domain; |                                              |
| E7FAD0 | myh2.1.1 | Uncharacterized protein                                       | _ELEEK(cr)MVSLLQEK_     | 878  | 1 | KKKELEEKMVSLLQE | .....K.V.....     | cytosol       | intracellular organelle; intracellular non-membrane-bounded organelle; cytoskeleton part; intracellular organelle part; macromolecular complex; intracellular part; cell; actin cytoskeleton; organelle part; non-membrane-bounded organelle; organelle; cytoskeleton; cell part; intracellular; myosin complex; protein complex;                                                                                     | ATP binding; motor activity; nucleoside phosphate binding; nucleoside binding; ion binding; hydrolase activity, acting on acid anhydrides; hydrolase activity; nucleotide binding; nucleoside-triphosphatase activity; organic cyclic compound binding; heterocyclic compound binding; ribonucleoside binding; carbohydrate derivative binding; pyrophosphatase activity; catalytic activity; ribonucleotide binding; binding; purine ribonucleoside binding; anion binding; purine ribonucleotide binding; adenylyl ribonucleotide binding; adenylyl nucleotide binding; purine nucleoside binding; hydrolase activity, acting on acid anhydrides, in phosphorus-containing anhydrides; purine nucleotide binding; small molecule binding; purine ribonucleoside triphosphate binding; | K10352 | MYH; myosin heavy chain | dre04530 Tight junction - Danio rerio (zebrafish); | IPR002928; IPR004009; IPR001609; IPR027417; IPR027401; | Myosin tail; Myosin, N-terminal, SH3-like; Myosin head, motor domain; P-loop containing nucleoside triphosphate hydrolase; Myosin-like IQ motif-containing domain; |                                              |
| Q6DHP2 | tnni2b.2 | Troponin I, skeletal, fast 2b.2                               | _ELHGK(cr)IDVDEER       | 67   | 1 | LCKELHQKIDVDEE  |                   | mitochondria  | organelle; intracellular membrane-bounded organelle; intracellular organelle; nucleus; cell part; intracellular; cytoplasm; intracellular part; membrane-bounded organelle; cell;                                                                                                                                                                                                                                     |                                                                                                                                                                                                                                                                                                                                                                                                                                                                                                                                                                                                                                                                                                                                                                                         |        |                         |                                                    |                                                        |                                                                                                                                                                    |                                              |
| Q6NUW5 | anp32e   | Acidic leucine-rich nuclear phosphoprotein 32 family member E | _ELSTLEALQNLK(cr)NLK_   | 113  | 1 | LEALQNLKNLKSLDL | .....K.L.....     | nuclear       |                                                                                                                                                                                                                                                                                                                                                                                                                       |                                                                                                                                                                                                                                                                                                                                                                                                                                                                                                                                                                                                                                                                                                                                                                                         |        |                         |                                                    |                                                        | IPR003603;                                                                                                                                                         | U2A1/phosphoprotein 32 family A, C-terminal; |
| E7FES0 | -        | Uncharacterized protein                                       | _ELTEGEOVK(cr)PHFEGIFK_ | 240  | 1 | TEGEOVKPHFEGIF  |                   | extracellular | lipid transport; single-organism process; lipid localization; organic substance transport; primary metabolic process; lipoprotein metabolic process; organic substance metabolic process; establishment of localization; transport; metabolic process; single-organism localization; protein metabolic process; macromolecule metabolic process; localization; macromolecule localization; single-organism transport; | extracellular region;                                                                                                                                                                                                                                                                                                                                                                                                                                                                                                                                                                                                                                                                                                                                                                   |        |                         |                                                    |                                                        |                                                                                                                                                                    |                                              |
| B8A568 | myh2.1.1 | Uncharacterized protein                                       | _ELTYQTEEDK(cr)K_       | 1860 | 1 | TYQTEEDKKNVRLQ  | .....DK.....      | nuclear       | intracellular organelle; intracellular non-membrane-bounded organelle; cytoskeleton part; intracellular organelle part; macromolecular complex; intracellular part; cell; actin cytoskeleton; organelle part; non-membrane-bounded organelle; organelle; cytoskeleton; cell part; intracellular; myosin complex; protein complex;                                                                                     | ATP binding; motor activity; nucleoside phosphate binding; nucleoside binding; ion binding; hydrolase activity, acting on acid anhydrides; hydrolase activity; nucleotide binding; nucleoside-triphosphatase activity; organic cyclic compound binding; heterocyclic compound binding; ribonucleoside binding; carbohydrate derivative binding; pyrophosphatase activity; catalytic activity; ribonucleotide binding; binding; purine ribonucleoside binding; anion binding; purine ribonucleotide binding; adenylyl ribonucleotide binding; adenylyl nucleotide binding; purine nucleoside binding; hydrolase activity, acting on acid anhydrides, in phosphorus-containing anhydrides; purine nucleotide binding; small molecule binding; purine ribonucleoside triphosphate binding; | K10352 | MYH; myosin heavy chain | dre04530 Tight junction - Danio rerio (zebrafish); | IPR002928; IPR004009; IPR001609; IPR027417; IPR027401; | Myosin tail; Myosin, N-terminal, SH3-like; Myosin head, motor domain; P-loop containing nucleoside triphosphate hydrolase; Myosin-like IQ motif-containing domain; |                                              |
| B8A561 | myh2.1.2 | Uncharacterized protein                                       | _ELTYQTEEDK(cr)K_       | 1860 | 1 | TYQTEEDKKNVRLQ  | .....DK.....      | nuclear       | intracellular organelle; intracellular non-membrane-bounded organelle; cytoskeleton part; intracellular organelle part; macromolecular complex; intracellular part; cell; actin cytoskeleton; organelle part; non-membrane-bounded organelle; organelle; cytoskeleton; cell part; intracellular; myosin complex; protein complex;                                                                                     | ATP binding; motor activity; nucleoside phosphate binding; nucleoside binding; ion binding; hydrolase activity, acting on acid anhydrides; hydrolase activity; nucleotide binding; nucleoside-triphosphatase activity; organic cyclic compound binding; heterocyclic compound binding; ribonucleoside binding; carbohydrate derivative binding; pyrophosphatase activity; catalytic activity; ribonucleotide binding; binding; purine ribonucleoside binding; anion binding; purine ribonucleotide binding; adenylyl ribonucleotide binding; adenylyl nucleotide binding; purine nucleoside binding; hydrolase activity, acting on acid anhydrides, in phosphorus-containing anhydrides; purine nucleotide binding; small molecule binding; purine ribonucleoside triphosphate binding; | K10352 | MYH; myosin heavy chain | dre04530 Tight junction - Danio rerio (zebrafish); | IPR002928; IPR004009; IPR001609; IPR027417; IPR027401; | Myosin tail; Myosin, N-terminal, SH3-like; Myosin head, motor domain; P-loop containing nucleoside triphosphate hydrolase; Myosin-like IQ motif-containing domain; |                                              |

|        |        |                                   |                       |      |   |                  |                |               |                                                                                                                                                                                                                                                                                                                                                                                                                                                                                                                                                                                                                                                                                                                                                            |                                                                                                                                                                                                                                                                                                                                                                                                                                                                                                                                                                                                                                                                                                                                                                                         |        |                                       |                                                                                                                                                                                                                                     |                                                        |                                                                                                                                                                    |
|--------|--------|-----------------------------------|-----------------------|------|---|------------------|----------------|---------------|------------------------------------------------------------------------------------------------------------------------------------------------------------------------------------------------------------------------------------------------------------------------------------------------------------------------------------------------------------------------------------------------------------------------------------------------------------------------------------------------------------------------------------------------------------------------------------------------------------------------------------------------------------------------------------------------------------------------------------------------------------|-----------------------------------------------------------------------------------------------------------------------------------------------------------------------------------------------------------------------------------------------------------------------------------------------------------------------------------------------------------------------------------------------------------------------------------------------------------------------------------------------------------------------------------------------------------------------------------------------------------------------------------------------------------------------------------------------------------------------------------------------------------------------------------------|--------|---------------------------------------|-------------------------------------------------------------------------------------------------------------------------------------------------------------------------------------------------------------------------------------|--------------------------------------------------------|--------------------------------------------------------------------------------------------------------------------------------------------------------------------|
| B8A568 | myh2.1 | Uncharacterized protein           | _ELTYQTEEDKK(cr)NVNR_ | 1861 | 1 | YQTEEDKKNVNR_LQD | .....K.V.....  | nuclear       | intracellular organelle; intracellular non-membrane-bounded organelle; cytoskeleton part; intracellular organelle part; macromolecular complex; intracellular part; cell; actin cytoskeleton; organelle part; non-membrane-bounded organelle; organelle; cytoskeleton; cell part; intracellular; myosin complex; protein complex;                                                                                                                                                                                                                                                                                                                                                                                                                          | ATP binding; motor activity; nucleoside phosphate binding; nucleoside binding; ion binding; hydrolase activity, acting on acid anhydrides; hydrolase activity; nucleotide binding; nucleoside-triphosphatase activity; organic cyclic compound binding; heterocyclic compound binding; ribonucleoside binding; carbohydrate derivative binding; pyrophosphatase activity; catalytic activity; ribonucleoside binding; binding; purine ribonucleoside binding; anion binding; purine ribonucleoside binding; adenylyl ribonucleoside binding; adenylyl nucleotide binding; purine nucleoside binding; hydrolase activity, acting on acid anhydrides, in phosphorus-containing anhydrides; purine nucleotide binding; small molecule binding; purine ribonucleoside triphosphate binding. | K10352 | MYH; myosin heavy chain               | dre04530 Tight junction - Danio rerio (zebrafish);                                                                                                                                                                                  | IPR002928; IPR004009; IPR001609; IPR027417; IPR027401; | Myosin tail; Myosin, N-terminal, SH3-like; Myosin head, motor domain; P-loop containing nucleoside triphosphate hydrolase; Myosin-like IQ motif-containing domain; |
| B8A561 | myh2.2 | Uncharacterized protein           | _ELTYQTEEDKK(cr)NVNR_ | 1861 | 1 | YQTEEDKKNVNR_LQD | .....K.V.....  | nuclear       | intracellular organelle; intracellular non-membrane-bounded organelle; cytoskeleton part; intracellular organelle part; macromolecular complex; intracellular part; cell; actin cytoskeleton; organelle part; non-membrane-bounded organelle; organelle; cytoskeleton; cell part; intracellular; myosin complex; protein complex;                                                                                                                                                                                                                                                                                                                                                                                                                          | ATP binding; motor activity; nucleoside phosphate binding; nucleoside binding; ion binding; hydrolase activity, acting on acid anhydrides; hydrolase activity; nucleotide binding; nucleoside-triphosphatase activity; organic cyclic compound binding; heterocyclic compound binding; ribonucleoside binding; carbohydrate derivative binding; pyrophosphatase activity; catalytic activity; ribonucleoside binding; binding; purine ribonucleoside binding; anion binding; purine ribonucleoside binding; adenylyl ribonucleoside binding; adenylyl nucleotide binding; purine nucleoside binding; hydrolase activity, acting on acid anhydrides, in phosphorus-containing anhydrides; purine nucleotide binding; small molecule binding; purine ribonucleoside triphosphate binding. | K10352 | MYH; myosin heavy chain               | dre04530 Tight junction - Danio rerio (zebrafish);                                                                                                                                                                                  | IPR002928; IPR004009; IPR001609; IPR027417; IPR027401; | Myosin tail; Myosin, N-terminal, SH3-like; Myosin head, motor domain; P-loop containing nucleoside triphosphate hydrolase; Myosin-like IQ motif-containing domain; |
| B3DFP9 | apoa2  | Uncharacterized protein           | _ELVDK(cr)YDGLR_      | 32   | 1 | PKKELVDKYDGLRTV  | .....DK.....   | extracellular | developmental process; cellular component organization; single-multicellular organism process; morphogenesis of an epithelium; epithelium development; epiboly involved in gastrulation with mouth forming second; tissue development; organelle fission; epiboly; morphogenesis of an epithelial sheet; single-organism process; multicellular organismal process; gastrulation; anatomical structure morphogenesis; gastrulation with mouth forming second; tissue morphogenesis; organelle organization; single-organism developmental process; nuclear division; multicellular organismal development; embryo development; cellular process; anatomical structure development; embryonic morphogenesis; cellular component organization or biogenesis; |                                                                                                                                                                                                                                                                                                                                                                                                                                                                                                                                                                                                                                                                                                                                                                                         |        |                                       |                                                                                                                                                                                                                                     |                                                        |                                                                                                                                                                    |
| E7EZ16 | -      | Uncharacterized protein           | _EMLQSK(cr)ILK_       | 383  | 1 | REMLQSKILKIRK    | .....K.LL..... | cytosol       | protein folding; metabolic process; response to stress; cellular protein metabolic process; cellular macromolecule metabolic process; protein metabolic process; response to stimulus; primary metabolic process; cellular process; cellular metabolic process; organic substance metabolic process;                                                                                                                                                                                                                                                                                                                                                                                                                                                       | ATP binding; nucleoside phosphate binding; nucleoside binding; ion binding; nucleotide binding; organic cyclic compound binding; heterocyclic compound binding; ribonucleoside binding; carbohydrate derivative binding; ribonucleoside binding; binding; purine ribonucleoside binding; anion binding; purine ribonucleoside binding; adenylyl ribonucleoside binding; adenylyl nucleotide binding; purine nucleoside binding; purine nucleotide binding; small molecule binding; purine ribonucleoside triphosphate binding.                                                                                                                                                                                                                                                          | K04079 | htpG; molecular chaperone HtpG        | dre04014 Progesterone-mediated oocyte maturation - Danio rerio (zebrafish); dre04141 Protein processing in endoplasmic reticulum - Danio rerio (zebrafish); dre04621 NOD-like receptor signaling pathway - Danio rerio (zebrafish); | IPR020568; IPR020575; IPR003594;                       | Ribosomal protein S5 domain 2-type fold; Heat shock protein Hsp90, N-terminal; Histidine kinase-like ATPase, C-terminal domain;                                    |
| Q6NYR4 | hspa8  | Heat shock cognate 71 kDa protein | _ENK(cr)TITNDK_       | 500  | 1 | KSTGKKNKITTNDK   |                | cytosol       | response to stress; response to stimulus;                                                                                                                                                                                                                                                                                                                                                                                                                                                                                                                                                                                                                                                                                                                  | ATP binding; nucleoside phosphate binding; nucleoside binding; ion binding; nucleotide binding; organic cyclic compound binding; heterocyclic compound binding; ribonucleoside binding; carbohydrate derivative binding; ribonucleoside binding; binding; purine ribonucleoside binding; anion binding; purine ribonucleoside binding; adenylyl ribonucleoside binding; adenylyl nucleotide binding; purine nucleoside binding; purine nucleotide binding; small molecule binding; purine ribonucleoside triphosphate binding.                                                                                                                                                                                                                                                          | K03283 | HSPA1_8; heat shock 70kDa protein 1/8 | dre04014 Protein processing in endoplasmic reticulum - Danio rerio (zebrafish); dre04144 Endocytosis - Danio rerio (zebrafish); dre03040 Spliceosome - Danio rerio (zebrafish);                                                     | IPR029048; IPR029047;                                  | Heat shock protein 70kD, C-terminal domain; Heat shock protein 70kD, peptide-binding domain;                                                                       |
| B8A561 | myh2.2 | Uncharacterized protein           | _ENLQK(cr)LM(cr)TNLR_ | 659  | 1 | QFRENQKLMNTNLR   |                | nuclear       | intracellular organelle; intracellular non-membrane-bounded organelle; cytoskeleton part; intracellular organelle part; cell; actin cytoskeleton; organelle part; non-membrane-bounded organelle; organelle; cytoskeleton; cell part; intracellular; myosin complex; protein complex;                                                                                                                                                                                                                                                                                                                                                                                                                                                                      | ATP binding; motor activity; nucleoside phosphate binding; nucleoside binding; ion binding; hydrolase activity, acting on acid anhydrides; hydrolase activity; nucleotide binding; nucleoside-triphosphatase activity; organic cyclic compound binding; heterocyclic compound binding; ribonucleoside binding; carbohydrate derivative binding; pyrophosphatase activity; catalytic activity; ribonucleoside binding; binding; purine ribonucleoside binding; anion binding; purine ribonucleoside binding; adenylyl ribonucleoside binding; adenylyl nucleotide binding; purine nucleoside binding; hydrolase activity, acting on acid anhydrides, in phosphorus-containing anhydrides; purine nucleotide binding; small molecule binding; purine ribonucleoside triphosphate binding. | K10352 | MYH; myosin heavy chain               | dre04530 Tight junction - Danio rerio (zebrafish);                                                                                                                                                                                  | IPR002928; IPR004009; IPR001609; IPR027417; IPR027401; | Myosin tail; Myosin, N-terminal, SH3-like; Myosin head, motor domain; P-loop containing nucleoside triphosphate hydrolase; Myosin-like IQ motif-containing domain; |
| B8A568 | myh2.1 | Uncharacterized protein           | _ENLQK(cr)LMNTNLR_    | 659  | 1 | QFRENQKLMNTNLR   |                | nuclear       | intracellular organelle; intracellular non-membrane-bounded organelle; cytoskeleton part; intracellular organelle part; macromolecular complex; intracellular part; cell; actin cytoskeleton; organelle part; non-membrane-bounded organelle; organelle; cytoskeleton; cell part; intracellular; myosin complex; protein complex;                                                                                                                                                                                                                                                                                                                                                                                                                          | ATP binding; motor activity; nucleoside phosphate binding; nucleoside binding; ion binding; hydrolase activity, acting on acid anhydrides; hydrolase activity; nucleotide binding; nucleoside-triphosphatase activity; organic cyclic compound binding; heterocyclic compound binding; ribonucleoside binding; carbohydrate derivative binding; pyrophosphatase activity; catalytic activity; ribonucleoside binding; binding; purine ribonucleoside binding; anion binding; purine ribonucleoside binding; adenylyl ribonucleoside binding; adenylyl nucleotide binding; purine nucleoside binding; hydrolase activity, acting on acid anhydrides, in phosphorus-containing anhydrides; purine nucleotide binding; small molecule binding; purine ribonucleoside triphosphate binding. | K10352 | MYH; myosin heavy chain               | dre04530 Tight junction - Danio rerio (zebrafish);                                                                                                                                                                                  | IPR002928; IPR004009; IPR001609; IPR027417; IPR027401; | Myosin tail; Myosin, N-terminal, SH3-like; Myosin head, motor domain; P-loop containing nucleoside triphosphate hydrolase; Myosin-like IQ motif-containing domain; |

|        |         |                         |                          |     |   |                                |                       |                                                                                                                                                                                                                                                                                                                                                                                                                                                                                                                                                                                                                                                                                                                                 |                                                                                                                                                                                                                                                                                                                                                                                                                                                                                                                                                                                                                                                                                                                                                                                         |                         |                                       |                                                                                                                                                         |                                                                                                                                                                                                                                                                                                                                |                                                                                                                                                                    |  |
|--------|---------|-------------------------|--------------------------|-----|---|--------------------------------|-----------------------|---------------------------------------------------------------------------------------------------------------------------------------------------------------------------------------------------------------------------------------------------------------------------------------------------------------------------------------------------------------------------------------------------------------------------------------------------------------------------------------------------------------------------------------------------------------------------------------------------------------------------------------------------------------------------------------------------------------------------------|-----------------------------------------------------------------------------------------------------------------------------------------------------------------------------------------------------------------------------------------------------------------------------------------------------------------------------------------------------------------------------------------------------------------------------------------------------------------------------------------------------------------------------------------------------------------------------------------------------------------------------------------------------------------------------------------------------------------------------------------------------------------------------------------|-------------------------|---------------------------------------|---------------------------------------------------------------------------------------------------------------------------------------------------------|--------------------------------------------------------------------------------------------------------------------------------------------------------------------------------------------------------------------------------------------------------------------------------------------------------------------------------|--------------------------------------------------------------------------------------------------------------------------------------------------------------------|--|
| B8A561 | myhz1.2 | Uncharacterized protein | _ENLQK(cr)LMTNLR_        | 659 | 1 | QFRENLGKMTNLR                  | nuclear               | intracellular organelle; intracellular non-membrane-bounded organelle; cytoskeletal part; intracellular organelle part; macromolecular complex; intracellular part; cell; actin cytoskeleton; organelle part; non-membrane-bounded organelle; organelle; cytoskeleton; cell part; intracellular; myosin complex; protein complex;                                                                                                                                                                                                                                                                                                                                                                                               | ATP binding; motor activity; nucleoside phosphate binding; nucleoside binding; ion binding; hydrolase activity, acting on acid anhydrides; hydrolase activity; nucleotide binding; nucleoside-triphosphatase activity; organic cyclic compound binding; heterocyclic compound binding; ribonucleoside binding; carbohydrate derivative binding; pyrophosphatase activity; catalytic activity; ribonucleoside binding; binding; purine ribonucleoside binding; anion binding; purine ribonucleoside binding; adenylyl ribonucleoside binding; adenylyl nucleotide binding; purine nucleoside binding; hydrolase activity, acting on acid anhydrides, in phosphorus-containing anhydrides; purine nucleotide binding; small molecule binding; purine ribonucleoside triphosphate binding; | K10352                  | MYH; myosin heavy chain               | dre04530 Tight Junction - Danio rerio (zebrafish);                                                                                                      | IPR002928; IPR004009; IPR001609; IPR027417; IPR027401;                                                                                                                                                                                                                                                                         | Myosin tail; Myosin, N-terminal, SH3-like; Myosin head, motor domain; P-loop containing nucleoside triphosphate hydrolase; Myosin-like IQ motif-containing domain; |  |
| O42363 | apoa1   | Apolipoprotein A-I      | _EQLVK(cr)AVEEAR_        | 218 | 1 | EYKQLVKAVEEARE .....K.V.....   | extracellular         | cholesterol metabolic process; lipid transport; organic hydroxy compound metabolic process; alcohol metabolic process; small molecule metabolic process; steroid metabolic process; organic cyclic compound metabolic process; single-organism process; organic substance transport; lipid localization; primary metabolic process; steroid metabolic process; lipoprotein metabolic process; establishment of localization; organic substance metabolic process; transport; metabolic process; single-organism localization; single-organism metabolic process; macromolecule metabolic process; protein metabolic process; localization; macromolecule localization; single-organism transport; lipid metabolic process;      | macromolecular complex; extracellular region part; extracellular space; high-density lipoprotein particle; protein-lipid complex; extracellular region; plasma lipoprotein particle;                                                                                                                                                                                                                                                                                                                                                                                                                                                                                                                                                                                                    | lipid binding; binding; | K08757                                | APOA1; apolipoprotein A-I                                                                                                                               | dre03320 PPAR signaling pathway - Danio rerio (zebrafish);                                                                                                                                                                                                                                                                     |                                                                                                                                                                    |  |
| Q804W0 | pvalb1  | Parvalbumin 1           | _ETK(cr)AFLSAGDSGDGK_    | 84  | 1 | VLTKETKAFLSAGD                 | cytosol               |                                                                                                                                                                                                                                                                                                                                                                                                                                                                                                                                                                                                                                                                                                                                 | cation binding; metal ion binding; calcium ion binding; binding; ion binding;                                                                                                                                                                                                                                                                                                                                                                                                                                                                                                                                                                                                                                                                                                           |                         |                                       | IPR011992; IPR002048;                                                                                                                                   | EF-hand domain pair; EF-hand domain;                                                                                                                                                                                                                                                                                           |                                                                                                                                                                    |  |
| Q7T3L3 | hsp90b1 | Chaperone protein GP96  | _ETLQOHK(cr)LLK_         | 455 | 1 | RETLOQHLLKVIK .....K.L.....    | endoplasmic reticulum | developmental process; single-multicellular organism process; response to stress; system development; cellular protein metabolic process; single-organism process; response to stimulus; primary metabolic process; otolith development; inner ear development; cellular metabolic process; multicellular organismal process; organic substance metabolic process; otolith tethering; protein folding; metabolic process; organ development; ear development; single-organism developmental process; cellular macromolecule metabolic process; protein metabolic process; macromolecule metabolic process; multicellular organismal development; sensory organ development; cellular process; anatomical structure development; | ATP binding; nucleoside phosphate binding; nucleoside binding; ion binding; nucleotide binding; organic cyclic compound binding; heterocyclic compound binding; ribonucleoside binding; carbohydrate derivative binding; ribonucleotide binding; binding; purine ribonucleoside binding; anion binding; purine ribonucleoside binding; adenylyl ribonucleoside binding; adenylyl nucleotide binding; purine nucleoside binding; purine nucleotide binding; small molecule binding; purine ribonucleoside triphosphate binding;                                                                                                                                                                                                                                                          | K09487                  | HSP90B; heat shock protein 90kDa beta | dre04141 Protein processing in endoplasmic reticulum - Danio rerio (zebrafish); dre04621 NOD-like receptor signaling pathway - Danio rerio (zebrafish); | IPR020568; IPR002075; IPR003594;                                                                                                                                                                                                                                                                                               | Ribosomal protein S5 domain 2-type fold; Heat shock protein Hsp90, N-terminal; Histidine kinase-like ATPase, C-terminal domain;                                    |  |
| H0WE66 | mdh1aa  | Uncharacterized protein | _EVIPTDK(cr)VEVGFK_      | 90  | 1 | REVIPTDKVEVGFKD .....DK.....   | extracellular         | dicarboxylic acid metabolic process; metabolic process; single-organism metabolic process; malate metabolic process; small molecule metabolic process; single-organism cellular process; carboxylic acid metabolic process; single-organism process; organic acid metabolic process; cellular process; cellular metabolic process; coacid metabolic process; organic substance metabolic process;                                                                                                                                                                                                                                                                                                                               | organic cyclic compound binding; heterocyclic compound binding; oxidoreductase activity, acting on CH-OH group of donors; nucleoside phosphate binding; catalytic activity; binding; nucleotide binding; malate dehydrogenase activity; small molecule binding; oxidoreductase activity;                                                                                                                                                                                                                                                                                                                                                                                                                                                                                                |                         |                                       | IPR016040; IPR001236;                                                                                                                                   | NAD(P)-binding domain; Lactate/malate dehydrogenase, N-terminal;                                                                                                                                                                                                                                                               |                                                                                                                                                                    |  |
| Q5T2Z9 | apobb.1 | Uncharacterized protein | _EVLMLK(cr)VIFDK_        | 518 | 1 | EGREVLMLKVIKAA .....K.L.....   | endoplasmic reticulum | response to chemical; response to stimulus;                                                                                                                                                                                                                                                                                                                                                                                                                                                                                                                                                                                                                                                                                     | lipid transporter activity; substrate-specific transporter activity; transporter activity;                                                                                                                                                                                                                                                                                                                                                                                                                                                                                                                                                                                                                                                                                              |                         |                                       | IPR011030; IPR015817; IPR015818; IPR001747; IPR015819; IPR016024; IPR015265; IPR009454;                                                                 | Vitellogenin, superhelical; Vitellinogen, open beta-sheet, subdomain 1; Vitellinogen, open beta-sheet, subdomain 2; Lipid transport protein, N-terminal; Lipid transport protein, beta-sheet shell; Vitellinogen, beta-sheet N-terminal; Armadillo-type fold; Vitellinogen, open beta-sheet; Lipid transport, open beta-sheet; |                                                                                                                                                                    |  |
| B3DFN3 | lnnb2   | Lamin B2                | _EVSGIK(cr)SLEYAELADAR_  | 73  | 1 | TREVSIGIKSLEYAEL .....K.L..... | nuclear               | intracellular organelle; intracellular non-membrane-bounded organelle; cytoskeletal part; intracellular organelle part; macromolecular complex; intracellular part; cell; organelle part; non-membrane-bounded organelle; organelle; cytoskeleton; intermediate filament; cytoskeleton; cell part; intracellular; intermediate filament; protein complex;                                                                                                                                                                                                                                                                                                                                                                       | structural molecule activity;                                                                                                                                                                                                                                                                                                                                                                                                                                                                                                                                                                                                                                                                                                                                                           | K07611                  |                                       | IPR001322;                                                                                                                                              | Lamin Tail Domain;                                                                                                                                                                                                                                                                                                             |                                                                                                                                                                    |  |
| Q6P0G6 | myf1    | Uncharacterized protein | _EVTK(cr)ILGNPTADDMVNRK_ | 89  | 1 | PTNKEVTKILGNPTA .....K.L.....  | cytosol               |                                                                                                                                                                                                                                                                                                                                                                                                                                                                                                                                                                                                                                                                                                                                 | cation binding; metal ion binding; calcium ion binding; binding; ion binding;                                                                                                                                                                                                                                                                                                                                                                                                                                                                                                                                                                                                                                                                                                           | K05738                  |                                       | IPR002048; IPR011992;                                                                                                                                   | EF-hand domain; EF-hand domain pair;                                                                                                                                                                                                                                                                                           |                                                                                                                                                                    |  |



|        |               |                                        |                      |     |   |                    |                 |                                                                                                                                                                                                                                                                                                                                                                                                                                                                                                                                                                                                                                                                                                                                                                                                                                                                                                                                                                                                                                                                                                                                                                                                                                                                                                                                                                                                                                                                                                                                                                                                                                                                                                                                                                                                                                                                                                                                                                                                                                                                                                                                                                                                                                                                                                                        |                                                                                                                                                                                                                                                                                                                                                                                                                                                                                                                                                                                                                                                                                                                                                                                                                                                                                        |                                                                                                                                                                                                                                                                                                                                                                                                                                                                                                                                                                                                                                                                                                                                                                                                                                                                                                                                                                                                                                                                                                                                                                                                                                                                                                                                                                                                                                                                                                                                                                                                                                                                                                                                                                                                                                                                                                                     |                                                                                                                                                                                                                                                                                                                                                                                                                                                                                   |
|--------|---------------|----------------------------------------|----------------------|-----|---|--------------------|-----------------|------------------------------------------------------------------------------------------------------------------------------------------------------------------------------------------------------------------------------------------------------------------------------------------------------------------------------------------------------------------------------------------------------------------------------------------------------------------------------------------------------------------------------------------------------------------------------------------------------------------------------------------------------------------------------------------------------------------------------------------------------------------------------------------------------------------------------------------------------------------------------------------------------------------------------------------------------------------------------------------------------------------------------------------------------------------------------------------------------------------------------------------------------------------------------------------------------------------------------------------------------------------------------------------------------------------------------------------------------------------------------------------------------------------------------------------------------------------------------------------------------------------------------------------------------------------------------------------------------------------------------------------------------------------------------------------------------------------------------------------------------------------------------------------------------------------------------------------------------------------------------------------------------------------------------------------------------------------------------------------------------------------------------------------------------------------------------------------------------------------------------------------------------------------------------------------------------------------------------------------------------------------------------------------------------------------------|----------------------------------------------------------------------------------------------------------------------------------------------------------------------------------------------------------------------------------------------------------------------------------------------------------------------------------------------------------------------------------------------------------------------------------------------------------------------------------------------------------------------------------------------------------------------------------------------------------------------------------------------------------------------------------------------------------------------------------------------------------------------------------------------------------------------------------------------------------------------------------------|---------------------------------------------------------------------------------------------------------------------------------------------------------------------------------------------------------------------------------------------------------------------------------------------------------------------------------------------------------------------------------------------------------------------------------------------------------------------------------------------------------------------------------------------------------------------------------------------------------------------------------------------------------------------------------------------------------------------------------------------------------------------------------------------------------------------------------------------------------------------------------------------------------------------------------------------------------------------------------------------------------------------------------------------------------------------------------------------------------------------------------------------------------------------------------------------------------------------------------------------------------------------------------------------------------------------------------------------------------------------------------------------------------------------------------------------------------------------------------------------------------------------------------------------------------------------------------------------------------------------------------------------------------------------------------------------------------------------------------------------------------------------------------------------------------------------------------------------------------------------------------------------------------------------|-----------------------------------------------------------------------------------------------------------------------------------------------------------------------------------------------------------------------------------------------------------------------------------------------------------------------------------------------------------------------------------------------------------------------------------------------------------------------------------|
| Q5U344 | atp2a1        | Calcium-transporting ATPase            | _EYEP(ox)GK(cr)YVR_  | 128 | 1 | EYEP(ox)GK(cr)YVR_ | plasma membrane | <p>regulation of biological quality; nucleoside metabolic process; purine nucleoside metabolic process; cellular divalent inorganic cation homeostasis; purine ribonucleoside monophosphate metabolic process; nucleoside metabolic process; positive regulation of muscle contraction; negative regulation of multicellular organismal process; single-organism process; purine ribonucleoside biosynthetic process; nucleoside biosynthetic process; biosynthetic process; ribonucleoside monophosphate biosynthetic process; cellular metabolic process; phosphate-containing compound metabolic process; response to external stimulus; ribose phosphate biosynthetic process; metabolic process; carbohydrate derivative biosynthetic process; positive regulation of multicellular organismal process; nucleoside phosphate metabolic process; regulation of skeletal muscle contraction; metal ion homeostasis; regulation of system process; ribose phosphate metabolic process; purine nucleoside triphosphate biosynthetic process; heterocycle biosynthetic process; purine ribonucleoside triphosphate biosynthetic process; ion homeostasis; calcium ion homeostasis; small molecule metabolic process; negative regulation of striated muscle contraction; ion homeostasis; nucleoside metabolic process; purine ribonucleoside monophosphate metabolic process; nucleoside metabolic process; single-organism process; purine ribonucleoside biosynthetic process; nucleoside biosynthetic process; ribonucleoside monophosphate biosynthetic process; cellular metabolic process; phosphate-containing compound metabolic process; ribose phosphate biosynthetic process; nucleoside phosphate metabolic process; purine nucleoside triphosphate biosynthetic process; heterocycle biosynthetic process; purine ribonucleoside triphosphate biosynthetic process; small molecule metabolic process; ATP biosynthetic process; single-organism cellular process; purine ribonucleoside triphosphate metabolic process; organic cyclic compound metabolic process; purine-containing compound metabolic process; ribonucleoside triphosphate metabolic process; purine ribonucleoside monophosphate biosynthetic process; organophosphate biosynthetic process; ribonucleoside biosynthetic process;</p> | <p>membrane; endoplasmic reticulum; nuclear outer membrane-endoplasmic reticulum membrane network; organelle membrane; myofibril; cytoplasm; intrinsic component of membrane; intracellular part; sarcoplasm; cell; I band; organelle part; non-membrane-bounded organelle; intracellular; cell part; membrane part; contractile fiber; membrane region; peiruclear region of cytoplasm; membrane-bounded organelle; endoplasmic reticulum membrane; intracellular organelle; bounding membrane of organelle; intracellular non-membrane-bounded organelle; H zone; intracellular organelle part; sarcoplasmic reticulum; endomembrane system; integral component of membrane; organelle; intracellular membrane-bounded organelle; endoplasmic reticulum part; endoplasmic reticulum-Golgi intermediate compartment; A band; sarcomere; contractile fiber part; cytoplasmic part;</p> | <p>ATPase activity, coupled to transmembrane movement of ions; nucleoside phosphate binding; primary active transmembrane transporter activity; substrate-specific transporter activity; hydrolase activity, acting on acid anhydrides; hydrolase activity; substrate-specific transmembrane transporter activity; ATPase activity, coupled to movement of substances; binding; purine ribonucleoside binding; heterocyclic compound binding; metal ion transmembrane transporter activity; pyrophosphatase activity; cation-transporting ATPase activity; catalytic activity; ribonucleotide binding; ATPase activity, coupled to movement of substances; binding; purine ribonucleoside binding; inorganic cation transmembrane transporter activity; hydrolase activity, acting on acid anhydrides, in phosphorus-containing anhydrides; transporter activity; purine nucleotide binding; purine ribonucleoside triphosphate binding; active transmembrane transporter activity; ATP binding; ion transmembrane transporter activity; ion binding; nucleoside binding; nucleoside binding; P-P-bond-hydrolysis-driven transmembrane transporter activity; ATPase activity, coupled to transmembrane movement of ions, phosphorylative mechanism; divalent inorganic cation transmembrane transporter activity; carbohydrate derivative binding; calcium-transporting ATPase activity; ATPase activity, coupled to transmembrane movement of substances; ATPase activity, coupled; calcium ion transmembrane transporter activity; metal ion binding; purine ribonucleoside binding; purine nucleoside binding; calcium ion binding; cation transmembrane transporter activity; transmembrane transporter activity; small molecule binding;</p>                                                                                                                                                                   | <p>K05853</p> <p>ATP2A; Ca2+ transportin g ATPase, sarcoplas mic/endopl asmic reticulum [EC:3.6.3.8]</p> <p>dre04020 Calcium signaling pathway - Danio rerio (zebrafish);</p> <p>IPR004014; IPR023298; IPR008250; IPR023299; IPR009068; IPR023214;</p> <p>Cation-transporting P-type ATPase, N-terminal; P-type ATPase, transmembrane domain; Cation-transporting P-type ATPase, C-terminal; HAD-like domain;</p>                                                                 |
| Q64220 | atp2a1        | Calcium-transporting ATPase            | _EYEP(ox)GK(cr)YVR_  | 128 | 1 | EYEP(ox)GK(cr)YVR_ | plasma membrane | <p>nucleoside metabolic process; purine ribonucleoside monophosphate metabolic process; nucleoside metabolic process; single-organism process; purine ribonucleoside biosynthetic process; nucleoside biosynthetic process; biosynthetic process; ribonucleoside monophosphate biosynthetic process; cellular metabolic process; phosphate-containing compound metabolic process; ribose phosphate biosynthetic process; metabolic process; carbohydrate derivative biosynthetic process; nucleoside phosphate metabolic process; ribose phosphate metabolic process; purine nucleoside triphosphate biosynthetic process; heterocycle biosynthetic process; purine ribonucleoside triphosphate biosynthetic process; small molecule metabolic process; ATP biosynthetic process; single-organism cellular process; purine ribonucleoside triphosphate metabolic process; organic cyclic compound metabolic process; purine-containing compound metabolic process; ribonucleoside triphosphate metabolic process; purine ribonucleoside monophosphate biosynthetic process; purine nucleoside biosynthetic process; organophosphate biosynthetic process; ribonucleoside biosynthetic process;</p>                                                                                                                                                                                                                                                                                                                                                                                                                                                                                                                                                                                                                                                                                                                                                                                                                                                                                                                                                                                                                                                                                                                     | <p>intrinsic component of membrane; membrane; integral component of membrane; membrane part;</p>                                                                                                                                                                                                                                                                                                                                                                                                                                                                                                                                                                                                                                                                                                                                                                                       | <p>ATPase activity, coupled to transmembrane movement of ions; nucleoside phosphate binding; primary active transmembrane transporter activity; substrate-specific transporter activity; hydrolase activity, acting on acid anhydrides; hydrolase activity; substrate-specific transmembrane transporter activity; ATPase activity, coupled to movement of substances; binding; purine ribonucleoside binding; heterocyclic compound binding; metal ion transmembrane transporter activity; pyrophosphatase activity; cation-transporting ATPase activity; catalytic activity; ribonucleotide binding; ATPase activity, coupled to movement of substances; binding; purine ribonucleoside binding; cation binding; hydrolase activity, acting on acid anhydrides, catalyzing transmembrane movement of substances; anion binding; adenylyl ribonucleotide binding; adenylyl nucleotide binding; inorganic cation transmembrane transporter activity; hydrolase activity, acting on acid anhydrides, in phosphorus-containing anhydrides; transporter activity; purine nucleotide binding; purine ribonucleoside triphosphate binding; active transmembrane transporter activity; ATP binding; ion transmembrane transporter activity; ion binding; nucleoside binding; nucleoside binding; nucleoside-triphosphatase activity; ribonucleoside binding; P-P-bond-hydrolysis-driven transmembrane transporter activity; ATPase activity, coupled to transmembrane movement of ions, phosphorylative mechanism; divalent inorganic cation transmembrane transporter activity; carbohydrate derivative binding; calcium-transporting ATPase activity; ATPase activity, coupled; metal ion binding; calcium ion transmembrane transporter activity; purine ribonucleoside binding; purine nucleoside binding; cation transmembrane transporter activity; transmembrane transporter activity; small molecule binding;</p> | <p>K05853</p> <p>ATP2A; Ca2+ transportin g ATPase, sarcoplas mic/endopl asmic reticulum [EC:3.6.3.8]</p> <p>dre04020 Calcium signaling pathway - Danio rerio (zebrafish);</p> <p>IPR023298; IPR004014; IPR023299; IPR008250; IPR009068; IPR023214;</p> <p>P-type ATPase, transmembrane domain; Cation-transporting P-type ATPase, N-terminal; P-type ATPase, transmembrane domain N; P-type ATPase, A domain; Cation-transporting P-type ATPase, C-terminal; HAD-like domain;</p> |
| F1QUR3 |               | Protein disulfide-isomerase (Fragment) | _FAHTN(ox)GK(cr)YVR_ | 149 | 1 | TNNEDLLKKGIDGE     | cytosol         | <p>regulation of cellular process; regulation of biological quality; small molecule metabolic process; cell redox homeostasis; single-organism cellular process; other metabolic process; cellular homeostasis; single-organism process; organic substance metabolic process; homeostatic process; metabolic process; regulation of biological process; single-organism metabolic process; glycerol ether metabolic process; cellular process; biological regulation;</p>                                                                                                                                                                                                                                                                                                                                                                                                                                                                                                                                                                                                                                                                                                                                                                                                                                                                                                                                                                                                                                                                                                                                                                                                                                                                                                                                                                                                                                                                                                                                                                                                                                                                                                                                                                                                                                              | <p>organelle; intracellular membrane-bounded organelle; intracellular organelle; endoplasmic reticulum; cell part; intracellular; cytoplasm; endomembrane system; intracellular part; membrane-bounded organelle; cell; cytoplasmic part;</p>                                                                                                                                                                                                                                                                                                                                                                                                                                                                                                                                                                                                                                          | <p>protein disulfide oxidoreductase activity; oxidoreductase activity, acting on a sulfur group of donors; disulfide oxidoreductase activity; electron carrier activity; catalytic activity; oxidoreductase activity;</p>                                                                                                                                                                                                                                                                                                                                                                                                                                                                                                                                                                                                                                                                                                                                                                                                                                                                                                                                                                                                                                                                                                                                                                                                                                                                                                                                                                                                                                                                                                                                                                                                                                                                                           | <p>K08056</p> <p>PDIA3; protein disulfide isomerase family A, member 3 [EC:5.3.4.1]</p> <p>dre04141 Protein processing in endoplasmic reticulum - Danio rerio (zebrafish);</p> <p>IPR005788; IPR013766; IPR013236;</p> <p>Disulfide isomerase; Thio-redox domain; Thio-redoxin-like fold;</p>                                                                                                                                                                                     |
| F1QEW2 | sidkey-1833.5 | Uncharacterized protein (Fragment)     | _FASFIDK(cr)AR_      | 191 | 1 | HNAVLRAKSMFTNP     | nuclear         | <p>intracellular organelle; intracellular non-membrane-bounded organelle; cytoskeletal part; intracellular organelle part; macromolecular complex; intracellular part; cell; organelle part; non-membrane-bounded organelle; organelle; cytoskeleton; intermediate filament cytoskeleton; cell part; intracellular; intermediate filament; protein complex;</p>                                                                                                                                                                                                                                                                                                                                                                                                                                                                                                                                                                                                                                                                                                                                                                                                                                                                                                                                                                                                                                                                                                                                                                                                                                                                                                                                                                                                                                                                                                                                                                                                                                                                                                                                                                                                                                                                                                                                                        | <p>structural molecule activity;</p>                                                                                                                                                                                                                                                                                                                                                                                                                                                                                                                                                                                                                                                                                                                                                                                                                                                   |                                                                                                                                                                                                                                                                                                                                                                                                                                                                                                                                                                                                                                                                                                                                                                                                                                                                                                                                                                                                                                                                                                                                                                                                                                                                                                                                                                                                                                                                                                                                                                                                                                                                                                                                                                                                                                                                                                                     |                                                                                                                                                                                                                                                                                                                                                                                                                                                                                   |

|        |         |                                     |                     |     |   |                 |               |                       |                                                                                                                                                                                                                                                                                                                                                                                                                                                                                                                                                                                                                                                                                                                                 |                                                                                                                                                                                                                                                                                                                                                                                                                                                                                                                                                                                                                                                                                                                                                                                                                                                                                                                    |        |                                       |                                                                                                                                                         |                                                                   |                                                                                                                                                                                                                                                                                                                                         |
|--------|---------|-------------------------------------|---------------------|-----|---|-----------------|---------------|-----------------------|---------------------------------------------------------------------------------------------------------------------------------------------------------------------------------------------------------------------------------------------------------------------------------------------------------------------------------------------------------------------------------------------------------------------------------------------------------------------------------------------------------------------------------------------------------------------------------------------------------------------------------------------------------------------------------------------------------------------------------|--------------------------------------------------------------------------------------------------------------------------------------------------------------------------------------------------------------------------------------------------------------------------------------------------------------------------------------------------------------------------------------------------------------------------------------------------------------------------------------------------------------------------------------------------------------------------------------------------------------------------------------------------------------------------------------------------------------------------------------------------------------------------------------------------------------------------------------------------------------------------------------------------------------------|--------|---------------------------------------|---------------------------------------------------------------------------------------------------------------------------------------------------------|-------------------------------------------------------------------|-----------------------------------------------------------------------------------------------------------------------------------------------------------------------------------------------------------------------------------------------------------------------------------------------------------------------------------------|
| Q7T3L3 | hsp90b1 | Chaperone protein GP96              | _FDES(DK)(cr)AK_    | 603 | 1 | VKFDSDKAKEKREA  | .....DK.....  | endoplasmic reticulum | developmental process; single-multicellular organism process; response to stress; system development; cellular protein metabolic process; single-organism process; response to stimulus; primary metabolic process; otolith development; inner ear development; cellular metabolic process; multicellular organismal process; organic substance metabolic process; otolith tethering; protein folding; metabolic process; organ development; ear development; single-organism developmental process; cellular macromolecule metabolic process; protein metabolic process; macromolecule metabolic process; multicellular organismal development; sensory organ development; cellular process; anatomical structure development. | ATP binding; nucleoside phosphate binding; nucleoside binding; ion binding; nucleotide binding; organic cyclic compound binding; heterocyclic compound binding; ribonucleotide binding; carbohydrate derivative binding; ribonucleotide binding; binding; purine ribonucleotide binding; anion binding; purine ribonucleotide binding; adenylyl ribonucleotide binding; adenylyl nucleotide binding; purine nucleoside binding; purine nucleotide binding; small molecule binding; purine ribonucleotide triphosphate binding;                                                                                                                                                                                                                                                                                                                                                                                     | K09487 | HSP90B; heat shock protein 90kDa beta | dre04141 Protein processing in endoplasmic reticulum - Danio rerio (zebrafish); dre04621 NOD-like receptor signaling pathway - Danio rerio (zebrafish); | IPR020568; IPR020575; IPR003594;                                  | Ribosomal protein S5 domain 2-type fold; Heat shock protein Hsp90, N-terminal; Histidine kinase-like ATPase, C-terminal domain;                                                                                                                                                                                                         |
| E7FEZ9 | atox1   | Copper chaperone Atox1              | _FDIDLPNK(cr)K_     | 37  | 1 | FDIDLPNKVFIESD  | .....K.V..... | cytosol               | transport; single-organism localization; cation transport; metal ion transport; ion transport; single-organism process; localization; single-organism transport; establishment of localization;                                                                                                                                                                                                                                                                                                                                                                                                                                                                                                                                 | metal ion binding; cation binding; binding; ion binding;                                                                                                                                                                                                                                                                                                                                                                                                                                                                                                                                                                                                                                                                                                                                                                                                                                                           | K07213 |                                       |                                                                                                                                                         | IPR006121;                                                        | Heavy metal-associated domain, HMA;                                                                                                                                                                                                                                                                                                     |
| Q6PC53 | ppiab   | Peptidyl-prolyl cis-trans isomerase | _FEDENFTLK(cr)HGGK_ | 91  | 1 | EDENFTLKHGKGTL  | ..E...K.....  | cytosol               | cellular protein metabolic process; protein peptidyl-prolyl isomerization; peptidyl-proline modification; primary metabolic process; cellular metabolic process; organic substance metabolic process; protein folding; peptidyl-amino acid modification; metabolic process; cellular macromolecule metabolic process; cellular protein modification process; protein metabolic process; macromolecule metabolic process; macromolecule modification; protein modification process; cellular process;                                                                                                                                                                                                                            | peptidyl-prolyl cis-trans isomerase activity; isomerase activity; catalytic activity; cis-trans isomerase activity;                                                                                                                                                                                                                                                                                                                                                                                                                                                                                                                                                                                                                                                                                                                                                                                                | K03767 |                                       |                                                                                                                                                         | IPR002130; IPR029000;                                             | Cyclophilin-type peptidyl-prolyl cis-trans isomerase domain; Cyclophilin-like domain;                                                                                                                                                                                                                                                   |
| Q92005 | eef1a   | Elongation factor 1-alpha           | _FEEITK(cr)EVSAYK_  | 172 | 1 | ARFEEITKEVSAYK  | .....K.V..... | cytosol               | intracellular part; cell; cell part; intracellular cytoplasm;                                                                                                                                                                                                                                                                                                                                                                                                                                                                                                                                                                                                                                                                   | nucleoside phosphate binding; translation elongation factor activity; hydrolase activity, acting on acid anhydrides; hydrolase activity; organic cyclic compound binding; heterocyclic compound binding; pyrophosphatase activity; catalytic activity; ribonucleotide binding; binding; GTPase activity; purine ribonucleotide binding; anion binding; hydrolase activity, acting on acid anhydrides, in phosphorus-containing anhydrides; guanyl nucleotide binding; GTP binding; purine nucleoside binding; purine ribonucleoside triphosphate binding; RNA binding; ion binding; nucleoside binding; nucleotide binding; nucleoside-triphosphatase activity; ribonucleoside binding; translation factor activity, nucleic acid binding; carbohydrate derivative binding; nucleic acid binding; purine ribonucleotide binding; guanyl ribonucleotide binding; purine nucleoside binding; small molecule binding; | K03231 | EEF1A; elongation factor 1-alpha      | dre03013 RNA transport - Danio rerio (zebrafish);                                                                                                       | IPR004160; IPR004161; IPR009001; IPR027417; IPR000795; IPR009000; | Translation elongation factor EFTu/Ef1A, C-terminal; Translation elongation factor EFTu/Ef1A, domain 2; Translation elongation factor EFTu/Ef1A; EFTu/Ef1A initiation factor IF2gamma, C-terminal; P-loop containing nucleoside triphosphate hydrolase; Elongation factor, GTP-binding domain; Translation protein, beta-barrel domain; |
| Q92005 | eef1a   | Elongation factor 1-alpha           | _FEK(cr)EAAEMGK_    | 44  | 1 | RTIEKFEKAAEMGK  |               | cytosol               | intracellular part; cell; cell part; intracellular cytoplasm;                                                                                                                                                                                                                                                                                                                                                                                                                                                                                                                                                                                                                                                                   | nucleoside phosphate binding; translation elongation factor activity; hydrolase activity, acting on acid anhydrides; hydrolase activity; organic cyclic compound binding; heterocyclic compound binding; pyrophosphatase activity; catalytic activity; ribonucleotide binding; binding; GTPase activity; purine ribonucleotide binding; anion binding; hydrolase activity, acting on acid anhydrides, in phosphorus-containing anhydrides; guanyl nucleotide binding; GTP binding; purine nucleoside binding; purine ribonucleoside triphosphate binding; RNA binding; ion binding; nucleoside binding; nucleotide binding; nucleoside-triphosphatase activity; ribonucleoside binding; translation factor activity, nucleic acid binding; carbohydrate derivative binding; nucleic acid binding; purine ribonucleotide binding; guanyl ribonucleotide binding; purine nucleoside binding; small molecule binding; | K03231 | EEF1A; elongation factor 1-alpha      | dre03013 RNA transport - Danio rerio (zebrafish);                                                                                                       | IPR004160; IPR004161; IPR009001; IPR027417; IPR000795; IPR009000; | Translation elongation factor EFTu/Ef1A, C-terminal; Translation elongation factor EFTu/Ef1A, domain 2; Translation elongation factor EFTu/Ef1A; EFTu/Ef1A initiation factor IF2gamma, C-terminal; P-loop containing nucleoside triphosphate hydrolase; Elongation factor, GTP-binding domain; Translation protein, beta-barrel domain; |
| B8A568 | myh2.1  | Uncharacterized protein             | _FGHTK(cr)VFFK_     | 764 | 1 | EYRFGHTKVFFKAGL |               | nuclear               | intracellular organelle; intracellular non-membrane-bounded organelle; cytoskeleton part; intracellular organelle part; macromolecular complex; intracellular part; cell; actin cytoskeleton; organelle part; non-membrane-bounded organelle; organelle; cytoskeleton; cell part; intracellular; myosin complex; protein complex;                                                                                                                                                                                                                                                                                                                                                                                               | ATP binding; motor activity; nucleoside phosphate binding; nucleoside binding; ion binding; hydrolase activity, acting on acid anhydrides; hydrolase activity; nucleotide binding; nucleoside-triphosphatase activity; organic cyclic compound binding; heterocyclic compound binding; ribonucleoside binding; carbohydrate derivative binding; pyrophosphatase activity; catalytic activity; ribonucleotide binding; binding; purine ribonucleoside binding; anion binding; purine ribonucleoside binding; adenylyl ribonucleotide binding; adenylyl nucleotide binding; purine nucleoside binding; hydrolase activity, acting on acid anhydrides, in phosphorus-containing anhydrides; purine nucleotide binding; small molecule binding; purine ribonucleoside triphosphate binding;                                                                                                                            | K10352 | MYH; myosin heavy chain               | dre04530 Tight junction - Danio rerio (zebrafish);                                                                                                      | IPR002928; IPR004009; IPR001609; IPR027417; IPR027401;            | Myosin tail; Myosin, N-terminal, SH3-like; Myosin head, motor domain; P-loop containing nucleoside triphosphate hydrolase; Myosin-like IQ motif-containing domain;                                                                                                                                                                      |

|        |          |                                |                             |     |   |                 |               |                                                                                                                                                                                                                                                                                                                                                                                                                                                                                                                                                                                                                                                                                                                                                                                                                                                                                                                                                                                                                                                                                                                                                                                                                                         |                                                                                                                                                                                                                                                                                                                                                                                                                                                                                                                                                                                                                                                                                                                                                                                                                                                                                                                                                                                                                                                                                                                                                                                                                                                                                                                                                                                                                                                                                                                                                                                                                                                                                                                                                                                                                                                                                                                                                                           |        |                                                      |                                                                                                                                                                                                                                                                                                                                                                                                                          |                                                        |                                                                                                                                                                                                                                                                                           |
|--------|----------|--------------------------------|-----------------------------|-----|---|-----------------|---------------|-----------------------------------------------------------------------------------------------------------------------------------------------------------------------------------------------------------------------------------------------------------------------------------------------------------------------------------------------------------------------------------------------------------------------------------------------------------------------------------------------------------------------------------------------------------------------------------------------------------------------------------------------------------------------------------------------------------------------------------------------------------------------------------------------------------------------------------------------------------------------------------------------------------------------------------------------------------------------------------------------------------------------------------------------------------------------------------------------------------------------------------------------------------------------------------------------------------------------------------------|---------------------------------------------------------------------------------------------------------------------------------------------------------------------------------------------------------------------------------------------------------------------------------------------------------------------------------------------------------------------------------------------------------------------------------------------------------------------------------------------------------------------------------------------------------------------------------------------------------------------------------------------------------------------------------------------------------------------------------------------------------------------------------------------------------------------------------------------------------------------------------------------------------------------------------------------------------------------------------------------------------------------------------------------------------------------------------------------------------------------------------------------------------------------------------------------------------------------------------------------------------------------------------------------------------------------------------------------------------------------------------------------------------------------------------------------------------------------------------------------------------------------------------------------------------------------------------------------------------------------------------------------------------------------------------------------------------------------------------------------------------------------------------------------------------------------------------------------------------------------------------------------------------------------------------------------------------------------------|--------|------------------------------------------------------|--------------------------------------------------------------------------------------------------------------------------------------------------------------------------------------------------------------------------------------------------------------------------------------------------------------------------------------------------------------------------------------------------------------------------|--------------------------------------------------------|-------------------------------------------------------------------------------------------------------------------------------------------------------------------------------------------------------------------------------------------------------------------------------------------|
| B8A561 | myh2.1.2 | Uncharacterized protein        | _FGHTK(cr)VFFK_             | 764 | 1 | EYRFGHTKVFVKAGL | nuclear       | intracellular organelle; intracellular non-membrane-bounded organelle; cytoskeleton part; intracellular organelle part; macromolecular complex; intracellular part; cell; actin cytoskeleton; organelle part; non-membrane-bounded organelle; organelle; cytoskeleton; cell part; intracellular; myosin complex; protein complex;                                                                                                                                                                                                                                                                                                                                                                                                                                                                                                                                                                                                                                                                                                                                                                                                                                                                                                       | ATP binding; motor activity; nucleoside phosphate binding; nucleoside binding; ion binding; hydrolase activity, acting on acid anhydrides; hydrolase activity; nucleotide binding; nucleoside-triphosphate activity; organic cyclic compound binding; heterocyclic compound binding; ribonucleoside binding; carbohydrate derivative binding; pyrophosphatase activity; catalytic activity; ribonucleoside binding; binding; purine ribonucleoside binding; anion binding; purine ribonucleoside binding; adenylyl ribonucleoside binding; adenylyl nucleotide binding; purine nucleoside binding; hydrolase activity, acting on acid anhydrides, in phosphorus-containing anhydrides; purine nucleotide binding; small molecule binding; purine ribonucleoside triphosphate binding;                                                                                                                                                                                                                                                                                                                                                                                                                                                                                                                                                                                                                                                                                                                                                                                                                                                                                                                                                                                                                                                                                                                                                                                     | K10352 | MYH; myosin heavy chain                              | dre04630 Tight junction - Danio rerio (zebrafish);                                                                                                                                                                                                                                                                                                                                                                       | IPR002928; IPR004009; IPR001609; IPR027417; IPR027401; | Myosin tail; Myosin, N-terminal, SH3-like; Myosin head, motor domain; P-loop containing nucleoside triphosphate hydrolase; Myosin-like IQ motif-containing domain;                                                                                                                        |
| E9QFX0 | apoc1    | Uncharacterized protein        | _FGTOMK(cr)EIAEDLADK_       | 38  | 1 | TKFGTOMKEIAEDLA | extracellular | metabolic process; macromolecule metabolic process; protein metabolic process; primary metabolic process; lipoprotein metabolic process; organic substance metabolic process;                                                                                                                                                                                                                                                                                                                                                                                                                                                                                                                                                                                                                                                                                                                                                                                                                                                                                                                                                                                                                                                           | extracellular region;                                                                                                                                                                                                                                                                                                                                                                                                                                                                                                                                                                                                                                                                                                                                                                                                                                                                                                                                                                                                                                                                                                                                                                                                                                                                                                                                                                                                                                                                                                                                                                                                                                                                                                                                                                                                                                                                                                                                                     |        |                                                      |                                                                                                                                                                                                                                                                                                                                                                                                                          |                                                        |                                                                                                                                                                                                                                                                                           |
| E7F4R9 | -        | Isoctrate dehydrogenase [NADP] | _FK(cr)DFQDIFEK_            | 259 | 1 | KAYDGRFKDFQDIF  | mitochondria  | tricarboxylic acid metabolic process; oxidation-reduction process; small molecule metabolic process; tricarboxylic acid cycle; single-organism cellular process; single-organism process; isocitrate metabolic process; primary metabolic process; cellular respiration; cellular metabolic process; organic substance metabolic process; citrate metabolic process; metabolic process; generation of precursor metabolites and energy; aerobic respiration; single-organism metabolic process; energy derivation by oxidation of organic compounds; carboxylic acid metabolic process; organic acid metabolic process; cellular process; oxoacid metabolic process;                                                                                                                                                                                                                                                                                                                                                                                                                                                                                                                                                                    | magnesium ion binding; nucleoside phosphate binding; ion binding; isocitrate dehydrogenase activity; nucleotide binding; cofactor binding; oxidoreductase activity; oxidoreductase activity, acting on CH-OH group of donors, heterocyclic compound binding; organic cyclic compound binding; oxidoreductase activity, acting on the CH-OH group of donors, NAD or NADP as acceptor; catalytic activity; NAD binding; binding; isocitrate dehydrogenase (NADP+) activity; metal ion binding; cation binding; small molecule binding; coenzyme binding;                                                                                                                                                                                                                                                                                                                                                                                                                                                                                                                                                                                                                                                                                                                                                                                                                                                                                                                                                                                                                                                                                                                                                                                                                                                                                                                                                                                                                    | K00031 | IDH1; isocitrate dehydrogenase [NADP+]               | dre01210 2-Oxocarboxylic acid metabolism - Danio rerio (zebrafish); dre01230 Biosynthesis of amino acids - Danio rerio (zebrafish); dre01200 Carbon metabolism - Danio rerio (zebrafish); dre01100 Metabolic pathways - Danio rerio (zebrafish); dre00480 Glutathione metabolism - Danio rerio (zebrafish); dre04146 Peroxisome - Danio rerio (zebrafish); dre00020 Citrate cycle (TCA cycle) - Danio rerio (zebrafish); | IPR024084;                                             | Isopropylmalate dehydrogenase-like domain;                                                                                                                                                                                                                                                |
| D1GJ56 | actn3a   | Actn3a                         | _FLDIPK(cr)MLDADDVNTPKPDEK_ | 229 | 1 | EKFLDIPKMLDADDI | cytosol       | cellular component biogenesis; cellular component organization; actin crosslink formation; protein complex subunit organization; single-organism cellular process; actin filament organization; single-organism process; actin filament bundle assembly; actin filament organization; macromolecular complex organization; single-organism organelle organization; actin cytoskeleton organization; cellular component assembly; organelle organization; actin filament-based process; cytoskeleton organization; cellular process; cellular component organization or biogenesis;                                                                                                                                                                                                                                                                                                                                                                                                                                                                                                                                                                                                                                                      | cation binding; metal ion binding; calcium ion binding; binding; ion binding;                                                                                                                                                                                                                                                                                                                                                                                                                                                                                                                                                                                                                                                                                                                                                                                                                                                                                                                                                                                                                                                                                                                                                                                                                                                                                                                                                                                                                                                                                                                                                                                                                                                                                                                                                                                                                                                                                             | K05699 | ACTN; actinin alpha                                  | dre04510 Focal adhesion - Danio rerio (zebrafish); dre04530 Tight junction - Danio rerio (zebrafish); dre04810 Regulation of actin cytoskeleton - Danio rerio (zebrafish); dre04520 Adherens junction - Danio rerio (zebrafish);                                                                                                                                                                                         | IPR014837; IPR011992; IPR002048; IPR001715;            | EF-hand, Ca insensitive; EF-hand domain pair; Calponin homology domain;                                                                                                                                                                                                                   |
| Q503V2 | apoea    | Uncharacterized protein        | _FNEDQLLVTK(cr)JLR_         | 107 | 1 | DLQLLVTKLRTHMEE | extracellular | lipid transport; single-organism process; lipid localization; organic substance transport; primary metabolic process; lipoprotein metabolic process; organic substance metabolic process; establishment of localization; transport; metabolic process; single-organism localization; protein metabolic process; macromolecule metabolic process; localization; macromolecule localization; single-organism transport;                                                                                                                                                                                                                                                                                                                                                                                                                                                                                                                                                                                                                                                                                                                                                                                                                   | lipid binding; binding;                                                                                                                                                                                                                                                                                                                                                                                                                                                                                                                                                                                                                                                                                                                                                                                                                                                                                                                                                                                                                                                                                                                                                                                                                                                                                                                                                                                                                                                                                                                                                                                                                                                                                                                                                                                                                                                                                                                                                   | K04524 |                                                      |                                                                                                                                                                                                                                                                                                                                                                                                                          |                                                        |                                                                                                                                                                                                                                                                                           |
| Q08BA1 | atp5a1   | ATP synthase subunit alpha     | _FNEGTEEK(cr)K_             | 238 | 1 | FNEGTEEKKLYCNI  | mitochondria  | nucleoside metabolic process; purine nucleoside metabolic process; purine ribonucleoside monophosphate metabolic process; nucleoside metabolic process; energy coupled proton transmembrane transport, against electrochemical gradient; single-organism process; biosynthetic process; nucleoside biosynthetic process; purine ribonucleoside biosynthetic process; ribonucleoside monophosphate biosynthetic process; cellular metabolic process; phosphate-containing compound metabolic process; establishment of localization; ribose phosphate biosynthetic process; metabolic process; carbohydrate derivative biosynthetic process; nucleoside phosphate metabolic process; ribose phosphate metabolic process; purine nucleoside triphosphate biosynthetic process; single-organism transport; heterocyclic biosynthetic process; purine ribonucleoside triphosphate biosynthetic process; cation transmembrane transport; small molecule metabolic process; ATP biosynthetic process; single-organism cellular process; purine-containing compound metabolic process; organic cyclic compound metabolic process; purine ribonucleoside triphosphate metabolic process; energy coupled proton transport across electrochemical | ATPase activity, coupled to transmembrane movement of ions; nucleoside phosphate binding; primary active transmembrane transporter activity; substrate-specific transporter activity; hydrolase activity, acting on acid anhydrides; ATPase activity, coupled to transmembrane movement of ions, rotational mechanism; monovalent inorganic cation transmembrane transporter activity; hydrolase activity; hydrogen ion transmembrane transporter activity; substrate-specific transmembrane transporter activity; proton-transporting ATP synthase activity, rotational mechanism; ATPase activity; organic cyclic compound binding; heterocyclic compound binding; cation-transporting ATPase activity; pyrophosphatase activity; catalytic activity; ribonucleoside binding; ATPase activity, coupled to movement of substances; binding; purine ribonucleoside binding; hydrogen-exporting ATPase activity; hydrolase activity, acting on acid anhydrides, catalyzing transmembrane movement of substances; anion binding; adenylyl ribonucleoside binding; adenylyl nucleotide binding; inorganic cation transmembrane transporter activity; hydrolase activity, acting on acid anhydrides, in phosphorus-containing anhydrides; transporter activity; purine nucleotide binding; purine ribonucleoside triphosphate binding; active transmembrane transporter activity; ATP binding; ion transmembrane transporter activity; ion binding; nucleoside binding; nucleotide binding; nucleoside-triphosphate activity; proton-transporting ATPase activity, rotational mechanism; ribonucleoside binding; P-P-bond-hydrolysis-driven transmembrane transporter activity; carbohydrate derivative binding; ATPase activity, coupled to transmembrane movement of substances; ATPase activity, coupled; purine ribonucleoside binding; purine nucleoside binding; cation transmembrane transporter activity; transmembrane transporter activity; small molecule binding; | K02132 | ATP5F1A; F-type H+-transporting ATPase subunit alpha | dre01100 Metabolic pathways - Danio rerio (zebrafish); dre00190 Oxidative phosphorylation - Danio rerio (zebrafish);                                                                                                                                                                                                                                                                                                     | IPR000793; IPR004100; IPR000194; IPR027417; IPR023366; | ATPase, F1/V1/A1 complex, alpha/beta subunit, C-terminal; ATPase, F1 complex alpha/beta subunit, N-terminal domain; ATPase, F1/V1/A1 complex, alpha/beta subunit; nucleoside-binding domain; P-loop containing nucleoside triphosphate hydrolase; ATP synthase subunit alpha-like domain; |
| A2CE73 | khdrts1a | Uncharacterized protein        | _FNFVVK(cr)ILGPOGSTK_       | 88  | 1 | PRFNFVVKILGPOGS | cytosol       |                                                                                                                                                                                                                                                                                                                                                                                                                                                                                                                                                                                                                                                                                                                                                                                                                                                                                                                                                                                                                                                                                                                                                                                                                                         | organic cyclic compound binding; heterocyclic compound binding; RNA binding; binding; nucleic acid binding;                                                                                                                                                                                                                                                                                                                                                                                                                                                                                                                                                                                                                                                                                                                                                                                                                                                                                                                                                                                                                                                                                                                                                                                                                                                                                                                                                                                                                                                                                                                                                                                                                                                                                                                                                                                                                                                               |        |                                                      |                                                                                                                                                                                                                                                                                                                                                                                                                          | K Homology domain; K Homology domain, type 1;          |                                                                                                                                                                                                                                                                                           |

|        |         |                                             |                                |     |   |                 |                 |                                                                                                                                                                                                                                                                                                                                                                                                                                                                                        |                                                                                                                                                                                                                                                                                                                                                                                                                                                                                                                                                                                                                                                                                                            |                                                                               |        |                                                     |                                                                                                                                                                                                                                                                                                                                                                                                                                                                                                                                                                                                                                                                                                                                                                                                                                             |                                                                                                                                               |                                                            |
|--------|---------|---------------------------------------------|--------------------------------|-----|---|-----------------|-----------------|----------------------------------------------------------------------------------------------------------------------------------------------------------------------------------------------------------------------------------------------------------------------------------------------------------------------------------------------------------------------------------------------------------------------------------------------------------------------------------------|------------------------------------------------------------------------------------------------------------------------------------------------------------------------------------------------------------------------------------------------------------------------------------------------------------------------------------------------------------------------------------------------------------------------------------------------------------------------------------------------------------------------------------------------------------------------------------------------------------------------------------------------------------------------------------------------------------|-------------------------------------------------------------------------------|--------|-----------------------------------------------------|---------------------------------------------------------------------------------------------------------------------------------------------------------------------------------------------------------------------------------------------------------------------------------------------------------------------------------------------------------------------------------------------------------------------------------------------------------------------------------------------------------------------------------------------------------------------------------------------------------------------------------------------------------------------------------------------------------------------------------------------------------------------------------------------------------------------------------------------|-----------------------------------------------------------------------------------------------------------------------------------------------|------------------------------------------------------------|
| Q1LYB7 | rp13a   | OTTDFAR0000009674                           | _FNK(cr)VLIIDGR_               | 7   | 1 | MADRFNKVLIDGRG  | cytosol         | cellular protein metabolic process; biosynthetic process; primary metabolic process; cellular metabolic process; organic substance biosynthetic process; cellular biosynthetic process; organic substance metabolic process; metabolic process; cellular macromolecule biosynthetic process; cellular macromolecule metabolic process; gene expression; macromolecule metabolic process; protein metabolic process; macromolecule biosynthetic process; translation; cellular process; | intracellular organelle; ribosome; intracellular non-membrane-bounded organelle; cytoplasm; intracellular organelle part; cell; organelle part; non-membrane-bounded organelle; organelle; large ribosomal subunit; ribosomal subunit; cell part; intracellular; ribonucleoprotein complex; cytoplasmic part;                                                                                                                                                                                                                                                                                                                                                                                              | structural constituent of ribosome; structural molecule activity;             | K02872 | RP-L13Ae; large subunit ribosomal protein L13Ae     | dre03010 Ribosome - Danio rerio (zebrafish);                                                                                                                                                                                                                                                                                                                                                                                                                                                                                                                                                                                                                                                                                                                                                                                                | IPR023564;                                                                                                                                    | Ribosomal protein L13 domain;                              |
| B3DFN3 | lmbn2   | Lamin B2                                    | _FSPK(cr)FVLK_                 | 486 | 1 | IVYKFSFKFVLKAGQ | nuclear         | intracellular organelle; intracellular non-membrane-bounded organelle; cytoskeletal part; intracellular organelle part; cell; organelle part; non-membrane-bounded organelle; organelle; cytoskeleton; intermediate filament cytoskeleton; cell part; intracellular; intermediate filament; protein complex;                                                                                                                                                                           |                                                                                                                                                                                                                                                                                                                                                                                                                                                                                                                                                                                                                                                                                                            | structural molecule activity;                                                 | K07611 |                                                     | IPR001322;                                                                                                                                                                                                                                                                                                                                                                                                                                                                                                                                                                                                                                                                                                                                                                                                                                  | Lamin Tail Domain;                                                                                                                            |                                                            |
| O93409 | mylplf  | Myli2 protein                               | _FTAEMK(cr)NLWAAFPDVAENVVYK_   | 138 | 1 | RFTAEMKNLWAAFP  | cytosol,nuclear |                                                                                                                                                                                                                                                                                                                                                                                                                                                                                        |                                                                                                                                                                                                                                                                                                                                                                                                                                                                                                                                                                                                                                                                                                            | cation binding; metal ion binding; calcium ion binding; binding; ion binding; | K12758 | MYLFP; fast skeletal myosin light chain 2           | dre04510 Focal adhesion - Danio rerio (zebrafish); dre04530 Tight junction - Danio rerio (zebrafish); dre04810 Regulation of actin cytoskeleton - Danio rerio (zebrafish);                                                                                                                                                                                                                                                                                                                                                                                                                                                                                                                                                                                                                                                                  | IPR011992; IPR002048;                                                                                                                         | EF-hand domain pair; EF-hand domain;                       |
| Q6TNV0 | cox4l1  | Cytochrome c oxidase subunit IV isoform 1   | _FVQQLSADQK(cr)SLK_            | 60  | 1 | QOLSADQKSLKEKEK | mitochondria    | response to oxygen levels; response to decreased oxygen levels; response to stimulus; response to stress; response to abiotic stimulus; response to hypoxia;                                                                                                                                                                                                                                                                                                                           | ion transmembrane transporter activity; substrate-specific transporter activity; monovalent inorganic cation transmembrane transporter activity; oxidoreductase activity, acting on a heme group of donors, oxygen as acceptor; oxidoreductase activity, acting on a heme group of donors; hydrogen ion transmembrane transporter activity; heme-copper terminal oxidase activity; oxidoreductase activity; substrate-specific transmembrane transporter activity; electron carrier activity; cytochrome-c oxidase activity; catalytic activity; inorganic cation transmembrane transporter activity; cation transmembrane transporter activity; transporter activity; transmembrane transporter activity; |                                                                               | K02263 | COX4; cytochrome c oxidase subunit 4                | dre04260 Cardiac muscle contraction - Danio rerio (zebrafish); dre01100 Metabolic pathways - Danio rerio (zebrafish); dre00190 Oxidative phosphorylation - Danio rerio (zebrafish);                                                                                                                                                                                                                                                                                                                                                                                                                                                                                                                                                                                                                                                         |                                                                                                                                               |                                                            |
| F8W246 | rp513   | Uncharacterized protein                     | _FVTGNK(cr)LR_                 | 70  | 1 | VRFVTGNKLRILKS  | mitochondria    | cellular protein metabolic process; biosynthetic process; primary metabolic process; cellular metabolic process; organic substance biosynthetic process; cellular biosynthetic process; organic substance metabolic process; metabolic process; cellular macromolecule biosynthetic process; cellular macromolecule metabolic process; gene expression; macromolecule metabolic process; protein metabolic process; macromolecule biosynthetic process; translation; cellular process; | ribosome; organelle; intracellular organelle; intracellular non-membrane-bounded organelle; cell part; intracellular; cytoplasm; macromolecular complex; intracellular part; cell; ribonucleoprotein complex; cytoplasmic part; non-membrane-bounded organelle;                                                                                                                                                                                                                                                                                                                                                                                                                                            | structural constituent of ribosome; structural molecule activity;             |        |                                                     | IPR012606; IPR009068;                                                                                                                                                                                                                                                                                                                                                                                                                                                                                                                                                                                                                                                                                                                                                                                                                       | Ribosomal protein S13/S15, N-terminal; S15/NS1, RNA-binding;                                                                                  |                                                            |
| E9QG51 | mylplb  | Uncharacterized protein                     | _GADPEDVIVSAFK(cr)VLDPEATGTIK_ | 85  | 1 | DVIVSAFKVLDPEAT | cytosol         |                                                                                                                                                                                                                                                                                                                                                                                                                                                                                        |                                                                                                                                                                                                                                                                                                                                                                                                                                                                                                                                                                                                                                                                                                            | cation binding; metal ion binding; calcium ion binding; binding; ion binding; |        |                                                     | IPR011992; IPR002048;                                                                                                                                                                                                                                                                                                                                                                                                                                                                                                                                                                                                                                                                                                                                                                                                                       | EF-hand domain pair; EF-hand domain;                                                                                                          |                                                            |
| O93409 | mylplf  | Myli2 protein                               | _GADPEDVIVSAFK(cr)VLDPEGTGSIK_ | 106 | 1 | DVIVSAFKVLDPEGT | cytosol,nuclear |                                                                                                                                                                                                                                                                                                                                                                                                                                                                                        |                                                                                                                                                                                                                                                                                                                                                                                                                                                                                                                                                                                                                                                                                                            | cation binding; metal ion binding; calcium ion binding; binding; ion binding; | K12758 | MYLFP; fast skeletal myosin light chain 2           | dre04510 Focal adhesion - Danio rerio (zebrafish); dre04530 Tight junction - Danio rerio (zebrafish); dre04810 Regulation of actin cytoskeleton - Danio rerio (zebrafish);                                                                                                                                                                                                                                                                                                                                                                                                                                                                                                                                                                                                                                                                  | IPR011992; IPR002048;                                                                                                                         | EF-hand domain pair; EF-hand domain;                       |
| Q6AZA0 | acat1   | Acetyl-CoA acetyltransferase, mitochondrial | _GAIDK(cr)AGIPVEEVK_           | 71  | 1 | AIKGAIDKAGIPVEE | mitochondria    | organelle; intracellular membrane-bounded organelle; intracellular organelle; cell part; intracellular; cytoplasm; intracellular part; membrane-bounded organelle; cell; mitochondrion; cytoplasmic part;                                                                                                                                                                                                                                                                              | transferase activity, transferring acyl groups; catalytic activity; binding; ion binding; metal ion binding; cation binding; acetyl-CoA C-acyltransferase activity; C-acyltransferase activity; acetyl-CoA C-acyltransferase activity; transferase activity; transferase activity, transferring acyl groups other than amino-acyl groups; acetyltransferase activity; C-acyltransferase activity;                                                                                                                                                                                                                                                                                                          |                                                                               | K00626 | E2.3.1.9; acetyl-CoA C-acyltransferase [EC:2.3.1.9] | dre01200 Carbon metabolism - Danio rerio (zebrafish); dre00900 Terpenoid backbone biosynthesis - Danio rerio (zebrafish); dre01212 Fatty acid metabolism - Danio rerio (zebrafish); dre00630 Glyoxylate and dicarboxylate metabolism - Danio rerio (zebrafish); dre00280 Valine, leucine and isoleucine degradation - Danio rerio (zebrafish); dre00640 Propanoate metabolism - Danio rerio (zebrafish); dre01100 Metabolic pathways - Danio rerio (zebrafish); dre00310 Lysine degradation - Danio rerio (zebrafish); dre00620 Pyruvate metabolism - Danio rerio (zebrafish); dre00072 Synthesis and degradation of ketone bodies - Danio rerio (zebrafish); dre00380 Tryptophan metabolism - Danio rerio (zebrafish); dre00071 Fatty acid degradation - Danio rerio (zebrafish); dre00650 Butanoate metabolism - Danio rerio (zebrafish); | IPR016039; IPR020616; IPR020617;                                                                                                              | Thiolase-like; Thiolase, N-terminal; Thiolase, C-terminal; |
| F1Q560 | shank3b | Uncharacterized protein                     | _GANK(cr)EIK_                  | 354 | 1 | LLFRGANKEIKNYNN | nuclear         |                                                                                                                                                                                                                                                                                                                                                                                                                                                                                        |                                                                                                                                                                                                                                                                                                                                                                                                                                                                                                                                                                                                                                                                                                            |                                                                               | K15009 |                                                     |                                                                                                                                                                                                                                                                                                                                                                                                                                                                                                                                                                                                                                                                                                                                                                                                                                             | variant SH3 domain; SH3 domain; Sterile alpha motif/pointed domain; Ankyrin repeat-containing domain; Sterile alpha motif domain; PDZ domain; |                                                            |

|        |         |                                          |                           |     |   |                 |               |                 |                                                                                                                                                                                                                                                                                                                                                                                                                                                                                                                                                                                                                                                                                                                                                                  |                                                                                                                                                                                                                                                                                                                                                                                                                                                                                   |        |                                                         |                                                                                                                                                                                                                                                                                                                                               |                                                                                                                                                                       |                                                                                                                    |
|--------|---------|------------------------------------------|---------------------------|-----|---|-----------------|---------------|-----------------|------------------------------------------------------------------------------------------------------------------------------------------------------------------------------------------------------------------------------------------------------------------------------------------------------------------------------------------------------------------------------------------------------------------------------------------------------------------------------------------------------------------------------------------------------------------------------------------------------------------------------------------------------------------------------------------------------------------------------------------------------------------|-----------------------------------------------------------------------------------------------------------------------------------------------------------------------------------------------------------------------------------------------------------------------------------------------------------------------------------------------------------------------------------------------------------------------------------------------------------------------------------|--------|---------------------------------------------------------|-----------------------------------------------------------------------------------------------------------------------------------------------------------------------------------------------------------------------------------------------------------------------------------------------------------------------------------------------|-----------------------------------------------------------------------------------------------------------------------------------------------------------------------|--------------------------------------------------------------------------------------------------------------------|
| E9QGA9 | gapdh   | Glyceraldehyde-3-phosphate dehydrogenase | _GASQNIIPASTGAAK(cr)AVGK_ | 213 | 1 | PASTGAAKAVGKVIP | .....K.V..... | cytosol         | organic cyclic compound binding; heterocyclic compound binding; oxidoreductase activity, acting on the aldehyde or oxo group of donors, NAD or NADP as acceptor; nucleoside phosphate binding; catalytic activity; binding; oxidoreductase activity, acting on the aldehyde or oxo group of donors; nucleotide binding; small molecule binding; oxidoreductase activity; glyceraldehyde-3-phosphate dehydrogenase (NAD+) (phosphorylating) activity;                                                                                                                                                                                                                                                                                                             |                                                                                                                                                                                                                                                                                                                                                                                                                                                                                   |        |                                                         | Glyceraldehyde 3-phosphate dehydrogenase, catalytic domain; NAD(P)-binding domain; Glyceraldehyde 3-phosphate dehydrogenase, NAD(P) binding domain;                                                                                                                                                                                           |                                                                                                                                                                       |                                                                                                                    |
| Q6P3L9 | glud1b  | Glutamate dehydrogenase 1                | _GATVENK(cr)LVEDLK_       | 68  | 1 | GATVENKLVEDLKT  | .....K.V..... | cytosol         | small molecule metabolic process; single-organism cellular process; nitrogen compound metabolic process; single-organism process; primary metabolic process; cellular metabolic process; organic substance metabolic process; metabolic process; cellular amino acid metabolic process; single-organism metabolic process; carboxylic acid metabolic process; organic acid metabolic process; cellular process; oxoacid metabolic process; organonitrogen compound metabolic process;                                                                                                                                                                                                                                                                            | organic cyclic compound binding; heterocyclic compound binding; nucleoside phosphate binding; catalytic activity; oxidoreductase activity, acting on the CH-NH2 group of donors, NAD or NADP as acceptor; binding; nucleotide binding; oxidoreductase activity, acting on the CH-NH2 group of donors; oxidoreductase activity; small molecule binding;                                                                                                                            | K00261 | CLUD1.2; glutamate dehydrogenase (NAD(P)+) [EC:1.4.1.3] | dre00330 Arginine and proline metabolism - Danio rerio (zebrafish); dre01100 Metabolic pathways - Danio rerio (zebrafish); dre00910 Nitrogen metabolism - Danio rerio (zebrafish); dre00250 Alanine, aspartate and glutamate metabolism - Danio rerio (zebrafish); dre00471 D-Glutamine and D-glutamate metabolism - Danio rerio (zebrafish); | Glutamate/phenyl alanine/leucine/valine dehydrogenase, C-terminal; NAD(P)-binding domain; Glutamate/phenyl alanine/leucine/valine dehydrogenase, dimerisation domain; |                                                                                                                    |
| F6NL16 | ppib    | Peptidyl-prolyl cis-trans isomerase      | _GDGTGGK(cr)SYGDR_        | 108 | 1 | RGDGTGGKSYGDRF  | .....K.L..... | extracellular   |                                                                                                                                                                                                                                                                                                                                                                                                                                                                                                                                                                                                                                                                                                                                                                  |                                                                                                                                                                                                                                                                                                                                                                                                                                                                                   | K03768 |                                                         | Cyclophilin-type peptidyl-prolyl cis-trans isomerase domain; Cyclophilin-like domain;                                                                                                                                                                                                                                                         |                                                                                                                                                                       |                                                                                                                    |
| I3ISQ0 | lgals2b | Galectin                                 | _GDVK(cr)ISVK_            | 118 | 1 | VHKGDVKIISVKAK  | .....K.L..... | cytosol         | carbohydrate binding; binding;                                                                                                                                                                                                                                                                                                                                                                                                                                                                                                                                                                                                                                                                                                                                   |                                                                                                                                                                                                                                                                                                                                                                                                                                                                                   | K06830 |                                                         | Galectin, carbohydrate recognition domain; Concavallin A-like lectin/glucanase, subgroup;                                                                                                                                                                                                                                                     |                                                                                                                                                                       |                                                                                                                    |
| Q6NWJ5 | tuba84  | Tubulin alpha 6                          | _GDVVPK(cr)DVNSAIATK_     | 326 | 1 | YRGDVPKDVNSAIA  | .....K.V..... | cytosol         | cellular component biogenesis; cellular component organization; cellular macromolecular complex assembly; protein complex subunit organization; single-organism cellular process; single-organism process; microtubule-based process; macromolecular complex subunit organization; microtubule-based movement; cellular component assembly; macromolecular complex assembly; protein polymerization; movement of cell or subcellular component; protein complex biogenesis; cellular process; protein complex assembly; cellular protein complex assembly; cellular component organization or biogenesis;                                                                                                                                                        | nucleoside phosphate binding; nucleoside binding; ion binding; hydrolase activity, acting on acid anhydrides; hydrolase activity; intracellular organelle; microtubule; intracellular non-membrane-bounded organelle; cytoskeletal part; intracellular organelle part; cytoplasm; macromolecular complex; intracellular part; cell; organelle part; non-membrane-bounded organelle; organelle; cytoskeleton; microtubule cytoskeleton; intracellular; cell part; protein complex; | K07374 | TUBA; tubulin alpha                                     | dre04145 Phagosome - Danio rerio (zebrafish); dre04540 Gap junction - Danio rerio (zebrafish);                                                                                                                                                                                                                                                | IPR003008; IPR023123; IPR008280; IPR018316;                                                                                                                           | Tubulin/FtsZ, GTPase domain; Tubulin, C-terminal; Tubulin/FtsZ, C-terminal; Tubulin/FtsZ, 2-layer sandwich domain; |
| F1QJP3 | myt10   | Uncharacterized protein                  | _GEEIK(cr)YHLSQADK_       | 119 | 1 | ILKGEIKYHLSQQA  |               | cytosol,nuclear | cation binding; metal ion binding; calcium ion binding; binding; ion binding;                                                                                                                                                                                                                                                                                                                                                                                                                                                                                                                                                                                                                                                                                    |                                                                                                                                                                                                                                                                                                                                                                                                                                                                                   |        |                                                         | IPR002048; IPR011992;                                                                                                                                                                                                                                                                                                                         | EF-hand domain; EF-hand domain pair;                                                                                                                                  |                                                                                                                    |
| F1QK60 | kr4     | Uncharacterized protein                  | _GELAVK(cr)DAK_           | 370 | 1 | ERGELAVKDAKLRI  |               | nuclear         | intracellular organelle; intracellular non-membrane-bounded organelle; cytoskeletal part; intracellular organelle part; macromolecular complex; intracellular part; cell; keratin filament; organelle part; non-membrane-bounded organelle; organelle; cytoskeleton; intermediate filament cytoskeleton; cell part; intracellular; intermediate filament; protein complex;                                                                                                                                                                                                                                                                                                                                                                                       | structural molecule activity;                                                                                                                                                                                                                                                                                                                                                                                                                                                     | K07605 |                                                         |                                                                                                                                                                                                                                                                                                                                               |                                                                                                                                                                       |                                                                                                                    |
| HOWEH3 | kharp   | Uncharacterized protein                  | _GGETK(cr)QLQER_          | 198 | 1 | GKGGETIKLQERAG  | .....K.L..... | cytosol         | organic cyclic compound binding; heterocyclic compound binding; RNA binding; binding; nucleic acid binding;                                                                                                                                                                                                                                                                                                                                                                                                                                                                                                                                                                                                                                                      |                                                                                                                                                                                                                                                                                                                                                                                                                                                                                   |        |                                                         | IPR009019; IPR004087; IPR004088;                                                                                                                                                                                                                                                                                                              | K homology domain, prokaryotic type; K Homology domain; K Homology domain, type 1;                                                                                    |                                                                                                                    |
| Q6PC12 | eno1a   | Enolase 1, (Alpha)                       | _GGK(cr)YDLDFK_           | 256 | 1 | SEFYGGKYDLDKFS  |               | cytosol         | single-organism carbohydrate catabolic process; glycolytic process; single-organism catabolic process; small molecule metabolic process; single-organism cellular process; single-organism process; carbohydrate metabolic process; primary metabolic process; cellular metabolic process; organic substance metabolic process; carbohydrate catabolic process; single-organism carbohydrate metabolic process; organic substance catabolic process; metabolic process; pyruvate metabolic process; generation of precursor metabolites and energy; single-organism metabolic process; carboxylic acid metabolic process; monocarboxylic acid metabolic process; organic acid metabolic process; cellular process; catabolic process; oxoacid metabolic process; | catalytic complex; cell part; intracellular; cytoplasm; macromolecular complex; intracellular part; cytosolic part; cell; cytosol; protein complex; phosphopyruvate hydratase complex; cytoplasmic part;                                                                                                                                                                                                                                                                          | K01689 | ENO; enolase [EC:4.2.1.11]                              | dre00010 Glycolysis / Gluconeogenesis - Danio rerio (zebrafish); dre01230 Biosynthesis of amino acids - Danio rerio (zebrafish); dre01200 Carbon metabolism - Danio rerio (zebrafish); dre01100 Metabolic pathways - Danio rerio (zebrafish); dre03018 RNA degradation - Danio rerio (zebrafish);                                             | IPR029065; IPR029017; IPR020810; IPR020811;                                                                                                                           | Enolase C-terminal domain-like; Enolase N-terminal domain-like; Enolase, C-terminal; Enolase, N-terminal;          |

|        |        |                                                 |                         |     |   |                 |               |              |                                                                                                                                                                                                                                                                                                                                                                                                                                                                                                                                                                                                                                                                                                                                                                                                                                                                                                                                                                                                                                                                                                                                                                                                                                                     |                                                                                                                                                                                                                                                                                                                                                           |                                        |                                                                                                                                                        |                                                                                                                                                        |                                                                                                                                                                                                                                                                                                                                             |
|--------|--------|-------------------------------------------------|-------------------------|-----|---|-----------------|---------------|--------------|-----------------------------------------------------------------------------------------------------------------------------------------------------------------------------------------------------------------------------------------------------------------------------------------------------------------------------------------------------------------------------------------------------------------------------------------------------------------------------------------------------------------------------------------------------------------------------------------------------------------------------------------------------------------------------------------------------------------------------------------------------------------------------------------------------------------------------------------------------------------------------------------------------------------------------------------------------------------------------------------------------------------------------------------------------------------------------------------------------------------------------------------------------------------------------------------------------------------------------------------------------|-----------------------------------------------------------------------------------------------------------------------------------------------------------------------------------------------------------------------------------------------------------------------------------------------------------------------------------------------------------|----------------------------------------|--------------------------------------------------------------------------------------------------------------------------------------------------------|--------------------------------------------------------------------------------------------------------------------------------------------------------|---------------------------------------------------------------------------------------------------------------------------------------------------------------------------------------------------------------------------------------------------------------------------------------------------------------------------------------------|
| Q7T306 | ckmb   | Uncharacterized protein                         | _GGNMK(cr)EVFK_         | 246 | 1 | MQKGGNMKEVFKRFC | .....K.V..... | cytosol      | ATP binding; nucleoside phosphate binding; nucleoside binding; ion binding; nucleotide binding; organic cyclic compound binding; heterocyclic compound binding; ribonucleoside binding; carbohydrate derivative binding; kinase activity; catalytic activity; ribonucleotide binding; binding; purine ribonucleotide binding; anion binding; purine ribonucleotide binding; adenylyl ribonucleotide binding; adenylyl nucleotide binding; purine nucleoside binding; transferase activity; transferase activity, transferring phosphorus-containing groups; purine nucleotide binding; small molecule binding; purine ribonucleoside triphosphate binding;                                                                                                                                                                                                                                                                                                                                                                                                                                                                                                                                                                                          |                                                                                                                                                                                                                                                                                                                                                           |                                        | ATP:guanine phosphotransferase, N-terminal; ATP:guanine phosphotransferase, catalytic domain; Glutamine synthetase/guanidate kinase, catalytic domain; |                                                                                                                                                        |                                                                                                                                                                                                                                                                                                                                             |
| A2BHA3 | ckma   | Uncharacterized protein                         | _GGNMK(cr)EVFK_         | 247 | 1 | MQKGGNMKEVFKRFC | .....K.V..... | cytosol      | ATP binding; nucleoside phosphate binding; nucleoside binding; ion binding; nucleotide binding; organic cyclic compound binding; heterocyclic compound binding; ribonucleoside binding; carbohydrate derivative binding; kinase activity; catalytic activity; ribonucleotide binding; binding; purine ribonucleotide binding; anion binding; purine ribonucleotide binding; adenylyl ribonucleotide binding; adenylyl nucleotide binding; purine nucleoside binding; transferase activity; transferase activity, transferring phosphorus-containing groups; purine nucleotide binding; small molecule binding; purine ribonucleoside triphosphate binding;                                                                                                                                                                                                                                                                                                                                                                                                                                                                                                                                                                                          | K00933                                                                                                                                                                                                                                                                                                                                                    | E2.7.3.2: creatine kinase [EC:2.7.3.2] | dre00330 Arginine and proline metabolism - Danio rerio (zebrafish); dre01100 Metabolic pathways - Danio rerio (zebrafish);                             | ATP:guanine phosphotransferase, N-terminal; ATP:guanine phosphotransferase, catalytic domain; Glutamine synthetase/guanidate kinase, catalytic domain; |                                                                                                                                                                                                                                                                                                                                             |
| Q7T306 | ckmb   | Uncharacterized protein                         | _GGVHVK(cr)LPK_         | 297 | 1 | LRGGVHVKLPKLSH  |               | cytosol      | ATP binding; nucleoside phosphate binding; nucleoside binding; ion binding; nucleotide binding; organic cyclic compound binding; heterocyclic compound binding; ribonucleoside binding; carbohydrate derivative binding; kinase activity; catalytic activity; ribonucleotide binding; binding; purine ribonucleotide binding; anion binding; purine ribonucleotide binding; adenylyl ribonucleotide binding; adenylyl nucleotide binding; purine nucleoside binding; transferase activity; transferase activity, transferring phosphorus-containing groups; purine nucleotide binding; small molecule binding; purine ribonucleoside triphosphate binding;                                                                                                                                                                                                                                                                                                                                                                                                                                                                                                                                                                                          |                                                                                                                                                                                                                                                                                                                                                           |                                        | ATP:guanine phosphotransferase, N-terminal; ATP:guanine phosphotransferase, catalytic domain; Glutamine synthetase/guanidate kinase, catalytic domain; |                                                                                                                                                        |                                                                                                                                                                                                                                                                                                                                             |
| A2BHA3 | ckma   | Uncharacterized protein                         | _GGVHVK(cr)LPK_         | 298 | 1 | LRGGVHVKLPKLSH  |               | cytosol      | ATP binding; nucleoside phosphate binding; nucleoside binding; ion binding; nucleotide binding; organic cyclic compound binding; heterocyclic compound binding; ribonucleoside binding; carbohydrate derivative binding; kinase activity; catalytic activity; ribonucleotide binding; binding; purine ribonucleotide binding; anion binding; purine ribonucleotide binding; adenylyl ribonucleotide binding; adenylyl nucleotide binding; purine nucleoside binding; transferase activity; transferase activity, transferring phosphorus-containing groups; purine nucleotide binding; small molecule binding; purine ribonucleoside triphosphate binding;                                                                                                                                                                                                                                                                                                                                                                                                                                                                                                                                                                                          | K00933                                                                                                                                                                                                                                                                                                                                                    | E2.7.3.2: creatine kinase [EC:2.7.3.2] | dre00330 Arginine and proline metabolism - Danio rerio (zebrafish); dre01100 Metabolic pathways - Danio rerio (zebrafish);                             | ATP:guanine phosphotransferase, N-terminal; ATP:guanine phosphotransferase, catalytic domain; Glutamine synthetase/guanidate kinase, catalytic domain; |                                                                                                                                                                                                                                                                                                                                             |
| Q08BA1 | atp5a1 | ATP synthase subunit alpha                      | _GHLDK(cr)MEPSK_        | 497 | 1 | GVRGHLDKMEPSKIT | .....DK.....  | mitochondria | nucleoside metabolic process; purine nucleoside metabolic process; purine ribonucleoside monophosphate metabolic process; nucleoside metabolic process; energy coupled proton transmembrane transport, against electrochemical gradient; single-organism process; biosynthetic process; nucleoside biosynthetic process; purine ribonucleoside biosynthetic process; ribonucleoside monophosphate biosynthetic process; cellular metabolic process; phosphate-containing compound metabolic process; establishment of localization; ribose phosphate biosynthetic process; metabolic process; carbohydrate derivative biosynthetic process; nucleoside phosphate metabolic process; ribose phosphate metabolic process; purine nucleoside triphosphate biosynthetic process; single-organism transport; heterocycle biosynthetic process; purine ribonucleoside triphosphate biosynthetic process; cation transmembrane transport; small molecule metabolic process; ATP biosynthetic process; single-organism cellular process; purine-containing compound metabolic process; organic cyclic compound metabolic process; purine ribonucleoside triphosphate metabolic process; energy coupled <i>transmembrane transport, down electrochemical</i> | proton-transporting ATP synthase complex catalytic core F(1); membrane; membrane part; cell part; intracellular; proton-transporting two-sector ATPase complex; macromolecular complex; proton-transporting two-sector ATPase complex, catalytic domain; intracellular part; protein complex; cell; proton-transporting ATP synthase complex;             | K02132                                 | ATP4F1A; F-type H+ transporter g ATPase subunit alpha                                                                                                  | dre01100 Metabolic pathways - Danio rerio (zebrafish); dre00190 Oxidative phosphorylation - Danio rerio (zebrafish);                                   | IPR000793: ATPase, F1/V1/A1 complex, alpha/beta subunit, C-terminal; ATPase, F1 complex alpha/beta subunit, N-terminal domain; ATPase, F1/V1/A1 complex, alpha/beta subunit; ATPase, F1 complex alpha/beta subunit, nucleotide-binding domain; P-loop containing nucleoside triphosphate hydrolase; ATP synthase subunit alpha-like domain; |
| Q7ZYX4 | ctcf6a | Chaperonin containing TCP1, subunit 6A (Zeta 1) | _GIDPFLDALAK(cr)EGVALR_ | 307 | 1 | FSLDALAKEGVALR  |               | cytosol      | protein folding; metabolic process; cellular protein metabolic process; cellular macromolecule metabolic process; macromolecule metabolic process; protein metabolic process; primary metabolic process; cellular process; cellular metabolic process; organic substance metabolic process;                                                                                                                                                                                                                                                                                                                                                                                                                                                                                                                                                                                                                                                                                                                                                                                                                                                                                                                                                         | intracellular part; cell; cell part; intracellular; cytoplasm;                                                                                                                                                                                                                                                                                            | K09498                                 |                                                                                                                                                        | TCP-1-like chaperonin intermediate domain; GroEL-like apical domain; GroEL-like equatorial domain;                                                     |                                                                                                                                                                                                                                                                                                                                             |
| A8KB78 | rps23  | Uncharacterized protein                         | _GVLEK(cr)VGVEAK_       | 54  | 1 | AKGMLEKVGVVEAKQ |               | cytosol      | cellular protein metabolic process; biosynthetic process; primary metabolic process; cellular metabolic process; organic substance biosynthetic process; cellular biosynthetic process; organic substance metabolic process; metabolic process; cellular macromolecule biosynthetic process; cellular macromolecule metabolic process; gene expression; macromolecule metabolic process; protein metabolic process; macromolecule biosynthetic process; translation; cellular process;                                                                                                                                                                                                                                                                                                                                                                                                                                                                                                                                                                                                                                                                                                                                                              | intracellular organelle; ribosome; intracellular non-membrane-bounded organelle; small ribosomal subunit; cytoplasm; intracellular organelle part; macromolecular complex; intracellular part; cell; organelle part; non-membrane bounded organelle; organelle; ribosomal subunit; cell part; intracellular; ribonucleoprotein complex; cytoplasmic part; | K02973                                 | RP-S23e; small ribosomal protein S23e                                                                                                                  | dre03010 Ribosome - Danio rerio (zebrafish);                                                                                                           | IPR012340: Nucleic acid-binding, OB-fold;                                                                                                                                                                                                                                                                                                   |

|        |            |                                 |                              |     |   |                 |               |               |                                                                                                                                                                                                                                                                                                                                                                                                                                                                                                                                                                                                                                                                                                                                                                |                                                                                                                                                                                                                                                                                                                                                                                                                                                                   |                                                                                                                                                                                                                                                                                                                                                                                                                                                                                                                                                                                                                                                                                                            |                                              |                                                                                                                            |                                                  |                                                                                                                                                                                     |                                                                                |
|--------|------------|---------------------------------|------------------------------|-----|---|-----------------|---------------|---------------|----------------------------------------------------------------------------------------------------------------------------------------------------------------------------------------------------------------------------------------------------------------------------------------------------------------------------------------------------------------------------------------------------------------------------------------------------------------------------------------------------------------------------------------------------------------------------------------------------------------------------------------------------------------------------------------------------------------------------------------------------------------|-------------------------------------------------------------------------------------------------------------------------------------------------------------------------------------------------------------------------------------------------------------------------------------------------------------------------------------------------------------------------------------------------------------------------------------------------------------------|------------------------------------------------------------------------------------------------------------------------------------------------------------------------------------------------------------------------------------------------------------------------------------------------------------------------------------------------------------------------------------------------------------------------------------------------------------------------------------------------------------------------------------------------------------------------------------------------------------------------------------------------------------------------------------------------------------|----------------------------------------------|----------------------------------------------------------------------------------------------------------------------------|--------------------------------------------------|-------------------------------------------------------------------------------------------------------------------------------------------------------------------------------------|--------------------------------------------------------------------------------|
| F8W4I2 | rplp0      | 60S acidic ribosomal protein P0 | _GK(cr)AVLMLGK_              | 50  | 1 | IRLSLRGKAVLMLGK | .....K.V..... | cytosol       | cellular component biogenesis; ribosome biogenesis; ribonucleoprotein complex biogenesis; cellular component organization or biogenesis;                                                                                                                                                                                                                                                                                                                                                                                                                                                                                                                                                                                                                       | ribosome; organelle; intracellular organelle; intracellular non-membrane-bounded organelle; cell part; intracellular; cytoplasm; macromolecular complex; intracellular part; cell; ribonucleoprotein complex; cytoplasmic part; non-membrane-bounded organelle;                                                                                                                                                                                                   |                                                                                                                                                                                                                                                                                                                                                                                                                                                                                                                                                                                                                                                                                                            |                                              |                                                                                                                            |                                                  |                                                                                                                                                                                     |                                                                                |
| Q0D276 | zgc:153846 | Uncharacterized protein         | _GK(cr)VIFYEDR_              | 3   | 1 | _____MGKVFYEDR  |               | extracellular |                                                                                                                                                                                                                                                                                                                                                                                                                                                                                                                                                                                                                                                                                                                                                                |                                                                                                                                                                                                                                                                                                                                                                                                                                                                   |                                                                                                                                                                                                                                                                                                                                                                                                                                                                                                                                                                                                                                                                                                            |                                              | IPR011024; IPR001064;                                                                                                      | Gamma-crystallin-related; Beta/gamma crystallin; |                                                                                                                                                                                     |                                                                                |
| Q8AY63 | ckbb       | Brain-subtype creatine kinase   | _GK(cr)YYALK_                | 172 | 1 | LDGDLGKYYALKDM  |               | cytosol       |                                                                                                                                                                                                                                                                                                                                                                                                                                                                                                                                                                                                                                                                                                                                                                |                                                                                                                                                                                                                                                                                                                                                                                                                                                                   | K00933                                                                                                                                                                                                                                                                                                                                                                                                                                                                                                                                                                                                                                                                                                     | E2.7.3.2; creatine kinase [EC:2.7.3.2]       | dre00330 Arginine and proline metabolism - Danio rerio (zebrafish); dre01100 Metabolic pathways - Danio rerio (zebrafish); | IPR022413; IPR014746; IPR022414;                 | ATP:guanine phosphotransferase, N-terminal; Glutamine synthetase/guanidino kinase, catalytic domain;                                                                                |                                                                                |
| Q7T306 | ckmb       | Uncharacterized protein         | _GK(cr)YYPLK_                | 171 | 1 | LDGEFKGYYPLKDM  |               | cytosol       |                                                                                                                                                                                                                                                                                                                                                                                                                                                                                                                                                                                                                                                                                                                                                                |                                                                                                                                                                                                                                                                                                                                                                                                                                                                   |                                                                                                                                                                                                                                                                                                                                                                                                                                                                                                                                                                                                                                                                                                            |                                              |                                                                                                                            | IPR022413; IPR022414; IPR014746;                 | ATP:guanine phosphotransferase, N-terminal; ATP:guanine phosphotransferase, catalytic domain; Glutamine synthetase/guanidino kinase, catalytic domain;                              |                                                                                |
| A2BHA3 | ckma       | Uncharacterized protein         | _GK(cr)YYPLK_                | 172 | 1 | LDGEFKGYYPLKSM  |               | cytosol       |                                                                                                                                                                                                                                                                                                                                                                                                                                                                                                                                                                                                                                                                                                                                                                |                                                                                                                                                                                                                                                                                                                                                                                                                                                                   | K00933                                                                                                                                                                                                                                                                                                                                                                                                                                                                                                                                                                                                                                                                                                     | E2.7.3.2; creatine kinase [EC:2.7.3.2]       | dre00330 Arginine and proline metabolism - Danio rerio (zebrafish); dre01100 Metabolic pathways - Danio rerio (zebrafish); | IPR022413; IPR022414; IPR014746;                 | ATP:guanine phosphotransferase, N-terminal; ATP:guanine phosphotransferase, catalytic domain; Glutamine synthetase/guanidino kinase, catalytic domain;                              |                                                                                |
| O93548 | be1        | Embryonic 1 beta-globin         | _GLELAVK(cr)NM(ox)DNIK_      | 77  | 1 | KGLELAVKNDNIKA  |               | cytosol       | cell part; intracellular; hemoglobin complex; cytoplasm; macromolecular complex; intracellular part; cytosolic part; protein complex; cell; cytosol; cytoplasmic part;                                                                                                                                                                                                                                                                                                                                                                                                                                                                                                                                                                                         | organic cyclic compound binding; heterocyclic compound binding; heme binding; iron ion binding; transition metal ion binding; oxygen binding; binding; ion binding; substrate-specific transporter activity; metal ion binding; cation binding; oxygen transporter activity; tetrapyrrole binding; transporter activity;                                                                                                                                          |                                                                                                                                                                                                                                                                                                                                                                                                                                                                                                                                                                                                                                                                                                            |                                              |                                                                                                                            | IPR009050; IPR000971; IPR012292;                 | Globin-like; Globin; Globin; structural domain;                                                                                                                                     |                                                                                |
| F6NT71 | hbbe1.1    | Uncharacterized protein         | _GLELAVK(cr)NMDNIK_          | 18  | 1 | KGLELAVKNDNIKA  |               | cytosol       |                                                                                                                                                                                                                                                                                                                                                                                                                                                                                                                                                                                                                                                                                                                                                                |                                                                                                                                                                                                                                                                                                                                                                                                                                                                   |                                                                                                                                                                                                                                                                                                                                                                                                                                                                                                                                                                                                                                                                                                            |                                              |                                                                                                                            |                                                  | IPR009050; IPR000971; IPR012292;                                                                                                                                                    | Globin-like; Globin; Globin; structural domain;                                |
| O93548 | be1        | Embryonic 1 beta-globin         | _GLELAVK(cr)NMDNIK_          | 18  | 1 | TQDIFAKADYDVIQ  |               | cytosol       | cell part; intracellular; hemoglobin complex; cytoplasm; macromolecular complex; intracellular part; cytosolic part; protein complex; cell; cytosol; cytoplasmic part;                                                                                                                                                                                                                                                                                                                                                                                                                                                                                                                                                                                         | organic cyclic compound binding; heterocyclic compound binding; heme binding; iron ion binding; transition metal ion binding; oxygen binding; binding; ion binding; substrate-specific transporter activity; metal ion binding; cation binding; oxygen transporter activity; tetrapyrrole binding; transporter activity;                                                                                                                                          |                                                                                                                                                                                                                                                                                                                                                                                                                                                                                                                                                                                                                                                                                                            |                                              |                                                                                                                            | IPR009050; IPR000971; IPR012292;                 | Globin-like; Globin; Globin; structural domain;                                                                                                                                     |                                                                                |
| Q6PBI5 | rps25      | 40S ribosomal protein S25       | _GLIK(cr)LVSK_               | 97  | 1 | LLGKGLKLVSKHRA  | .....K.V..... | nuclear       | ribosome; organelle; intracellular organelle; intracellular non-membrane-bounded organelle; cell part; intracellular; cytoplasm; macromolecular complex; intracellular part; cell; ribonucleoprotein complex; cytoplasmic part; non-membrane-bounded organelle;                                                                                                                                                                                                                                                                                                                                                                                                                                                                                                |                                                                                                                                                                                                                                                                                                                                                                                                                                                                   | K02975                                                                                                                                                                                                                                                                                                                                                                                                                                                                                                                                                                                                                                                                                                     | RP-S25; small subunit ribosomal protein S25e | dre03010 Ribosome - Danio rerio (zebrafish);                                                                               |                                                  |                                                                                                                                                                                     |                                                                                |
| Q4VBUT | cox5aa     | Cox5aa protein                  | _GMNTLIGYDLVPEPK(cr)ILDAALR_ | 78  | 1 | YDLVPEPKILDAALR | .....K.V..... | mitochondria  | nervous system development; developmental process; single-multicellular organism process; cell differentiation in spinal cord; spinal cord development; generation of neurons; embryonic organ development; system development; cellular developmental process; single-organism cellular process; neurogenesis; single-organism process; multicellular organismal process; central nervous system neuron differentiation; neuron differentiation; cell differentiation; organ development; ventral spinal cord development; central nervous system development; single-organism developmental process; multicellular organismal development; spinal cord motor neuron differentiation; embryo development; cellular process; anatomical structure development; | membrane; intracellular organelle; mitochondrial part; organelle membrane; organelle envelope; intracellular organelle part; cytoplasm; intracellular part; cell; organelle part; mitochondrion; mitochondrial envelope; intracellular membrane-bounded organelle; organelle; cell part; intracellular; envelope; organelle inner membrane; membrane-bounded organelle; mitochondrial inner membrane; mitochondrial membrane; cytoplasmic part;                   | ion transmembrane transporter activity; substrate-specific transporter activity; monovalent inorganic cation transmembrane transporter activity; oxidoreductase activity, acting on a heme group of donors, oxygen as acceptor; oxidoreductase activity, acting on a heme group of donors; hydrogen ion transmembrane transporter activity; heme-copper terminal oxidase activity; oxidoreductase activity; substrate-specific transmembrane transporter activity; electron carrier activity; cytochrome-c oxidase activity; catalytic activity; inorganic cation transmembrane transporter activity; cation transmembrane transporter activity; transporter activity; transmembrane transporter activity; |                                              | K02264                                                                                                                     | COX5a; cytochrome c oxidase subunit 5a           | dre04260 Cardiac muscle contraction - Danio rerio (zebrafish); dre01100 Metabolic pathways - Danio rerio (zebrafish); dre00190 Oxidative phosphorylation - Danio rerio (zebrafish); |                                                                                |
| E7F225 | zgc:163061 | Uncharacterized protein         | _GMVTK(cr)GVLK_              | 82  | 1 | AIKGMVTKGVLKQVK | .....K.V..... | nuclear       | cellular component biogenesis; cellular component organization; nucleosome organization; cellular macromolecular complex assembly; chromatin assembly or disassembly; protein complex subunit organization; macromolecular complex subunit organization; protein-DNA complex assembly; DNA packaging; nucleosome assembly; chromosome organization; cellular component assembly; macromolecular complex assembly; organelle organization; chromatin organization; protein complex biogenesis; chromatin assembly; cellular process; protein complex assembly; cellular component organization or biogenesis; protein-DNA complex subunit organization; DNA conformation change;                                                                                | intracellular organelle; intracellular non-membrane-bounded organelle; intracellular organelle part; macromolecular complex; intracellular part; cell; organelle part; DNA bending complex; chromosomal part; nucleosome; non-membrane-bounded organelle; intracellular membrane-bounded organelle; organelle; nucleus; chromatin; cell part; intracellular; chromosome; membrane-bounded organelle; protein complex; protein-DNA complex; DNA packaging complex; | organic cyclic compound binding; heterocyclic compound binding; DNA binding; binding; nucleic acid binding;                                                                                                                                                                                                                                                                                                                                                                                                                                                                                                                                                                                                | K11275                                       |                                                                                                                            |                                                  | IPR011991; IPR005818;                                                                                                                                                               | Winged helix-turn-helix DNA-binding domain; Linker histone H1/H45, domain H15; |

|        |                             |                           |                           |      |                 |                 |               |                                                                                                                                                                                                                                                                                                                                                                                                                                                                                                                                                                                                                                                                                                                                                                                                                                                                                                                                                                                                                                                                                                                                                                                                                                                                                                                                                                                                                                                                                                                                                                                                    |                                                                                                                                                                                                                                                                                                                                                                                                                                                                                                                                                                                                                                                                                                                                                                                                                                                                                                                                                                                                                                                                                                                                                                                                                                                                                                                                                                                                                                                                                                                                                                                                                                                                                                                                                                                                                                                                                                                                                                                                                                                                               |        |                                                                          |                                                                                                                             |                                                               |                                                                                                                                                                                                                                                                                                                  |
|--------|-----------------------------|---------------------------|---------------------------|------|-----------------|-----------------|---------------|----------------------------------------------------------------------------------------------------------------------------------------------------------------------------------------------------------------------------------------------------------------------------------------------------------------------------------------------------------------------------------------------------------------------------------------------------------------------------------------------------------------------------------------------------------------------------------------------------------------------------------------------------------------------------------------------------------------------------------------------------------------------------------------------------------------------------------------------------------------------------------------------------------------------------------------------------------------------------------------------------------------------------------------------------------------------------------------------------------------------------------------------------------------------------------------------------------------------------------------------------------------------------------------------------------------------------------------------------------------------------------------------------------------------------------------------------------------------------------------------------------------------------------------------------------------------------------------------------|-------------------------------------------------------------------------------------------------------------------------------------------------------------------------------------------------------------------------------------------------------------------------------------------------------------------------------------------------------------------------------------------------------------------------------------------------------------------------------------------------------------------------------------------------------------------------------------------------------------------------------------------------------------------------------------------------------------------------------------------------------------------------------------------------------------------------------------------------------------------------------------------------------------------------------------------------------------------------------------------------------------------------------------------------------------------------------------------------------------------------------------------------------------------------------------------------------------------------------------------------------------------------------------------------------------------------------------------------------------------------------------------------------------------------------------------------------------------------------------------------------------------------------------------------------------------------------------------------------------------------------------------------------------------------------------------------------------------------------------------------------------------------------------------------------------------------------------------------------------------------------------------------------------------------------------------------------------------------------------------------------------------------------------------------------------------------------|--------|--------------------------------------------------------------------------|-----------------------------------------------------------------------------------------------------------------------------|---------------------------------------------------------------|------------------------------------------------------------------------------------------------------------------------------------------------------------------------------------------------------------------------------------------------------------------------------------------------------------------|
| B0564  | Protein disulfide-isomerase | _GNPK(cr)EYSAGR_          | 112                       | 1    | GGEKGNPKEYSAGRQ | ..E....K.....   | extracellular | <p>regulation of cellular process; regulation of biological quality; small molecule metabolic process; cell redox homeostasis; single-organism cellular process; ether metabolic process; cellular homeostasis; single-organism process; organic substance metabolic process; homeostatic process; metabolic process; regulation of biological process; single-organism metabolic process; glycerol ether metabolic process; cellular process; biological regulation;</p> <p>organelle; intracellular membrane-bounded organelle; intracellular organelle; endoplasmic reticulum; cell part; intracellular; cytoplasm; endomembrane system; macromolecular complex; intracellular part; membrane-bounded organelle; cell; protein complex; collagen trimer; cytoplasmic part;</p>                                                                                                                                                                                                                                                                                                                                                                                                                                                                                                                                                                                                                                                                                                                                                                                                                  | <p>protein disulfide oxidoreductase activity; disulfide oxidoreductase activity; oxidoreductase activity, acting on single donors with incorporation of molecular oxygen, incorporation of two atoms of oxygen, electron carrier activity; oxidoreductase activity, acting on single donors with incorporation of molecular oxygen; isomerase activity; catalytic activity; dioxygenase activity; oxidoreductase activity, acting on a sulfur group of donors; oxidoreductase activity;</p>                                                                                                                                                                                                                                                                                                                                                                                                                                                                                                                                                                                                                                                                                                                                                                                                                                                                                                                                                                                                                                                                                                                                                                                                                                                                                                                                                                                                                                                                                                                                                                                   | K09580 | <p>PDIA1; protein disulfide-isomerase A1 [EC:5.3.4.1]</p>                | <p>dre04141 Protein processing in endoplasmic reticulum - Danio rerio (zebrafish);</p>                                      | <p>IPR005788; IPR013766; IPR012336;</p>                       | <p>Disulfide isomerase; Thioester domain; Thioesterin-like fold;</p>                                                                                                                                                                                                                                             |
| B8A568 | myhz1.1                     | Uncharacterized protein   | _GOEDMK(cr)EQVAMVER_      | 1670 | 1               | VRGQEDMKEQVAMVE |               | <p>intracellular organelle; intracellular non-membrane-bounded organelle; cytoskeleton part; intracellular organelle part; macromolecular complex; intracellular part; cell; actin cytoskeleton; organelle part; non-membrane-bounded organelle; organelle; cytoskeleton; cell part; intracellular; myosin complex; protein complex;</p>                                                                                                                                                                                                                                                                                                                                                                                                                                                                                                                                                                                                                                                                                                                                                                                                                                                                                                                                                                                                                                                                                                                                                                                                                                                           | <p>ATP binding; motor activity; nucleoside phosphate binding; nucleoside binding; ion binding; hydrolase activity, acting on acid anhydrides; hydrolase activity; nucleotide binding; nucleoside-triphosphatase activity; organic cyclic compound binding; heterocyclic compound binding; ribonucleoside binding; carboxylate derivative binding; pyrophosphatase activity; catalytic activity; ribonucleotide binding; binding; purine ribonucleoside binding; anion binding; purine ribonucleotide binding; adenylyl ribonucleotide binding; adenylyl nucleotide binding; purine nucleoside binding; hydrolase activity, acting on acid anhydrides, in phosphorus-containing anhydrides; purine nucleotide binding; small molecule binding; purine ribonucleoside triphosphate binding;</p>                                                                                                                                                                                                                                                                                                                                                                                                                                                                                                                                                                                                                                                                                                                                                                                                                                                                                                                                                                                                                                                                                                                                                                                                                                                                                 | K10352 | <p>MYH; myosin heavy chain</p>                                           | <p>dre04530 Tight junction - Danio rerio (zebrafish);</p>                                                                   | <p>IPR002928; IPR004009; IPR001609; IPR027417; IPR027401;</p> | <p>Myosin tail; Myosin, N-terminal, SH3-like; Myosin head, motor domain; P-loop containing nucleoside triphosphate hydrolase; Myosin-like IQ motif-containing domain;</p>                                                                                                                                        |
| B8A561 | myhz1.2                     | Uncharacterized protein   | _GOEDMK(cr)EQVAMVER_      | 1670 | 1               | VRGQEDMKEQVAMVE |               | <p>intracellular organelle; intracellular non-membrane-bounded organelle; cytoskeleton part; intracellular organelle part; macromolecular complex; intracellular part; cell; actin cytoskeleton; organelle part; non-membrane-bounded organelle; organelle; cytoskeleton; cell part; intracellular; myosin complex; protein complex;</p>                                                                                                                                                                                                                                                                                                                                                                                                                                                                                                                                                                                                                                                                                                                                                                                                                                                                                                                                                                                                                                                                                                                                                                                                                                                           | <p>ATP binding; motor activity; nucleoside phosphate binding; nucleoside binding; ion binding; hydrolase activity, acting on acid anhydrides; hydrolase activity; nucleotide binding; nucleoside-triphosphatase activity; organic cyclic compound binding; heterocyclic compound binding; ribonucleoside binding; carboxylate derivative binding; pyrophosphatase activity; catalytic activity; ribonucleotide binding; binding; purine ribonucleoside binding; anion binding; purine ribonucleotide binding; adenylyl ribonucleotide binding; adenylyl nucleotide binding; purine nucleoside binding; hydrolase activity, acting on acid anhydrides, in phosphorus-containing anhydrides; purine nucleotide binding; small molecule binding; purine ribonucleoside triphosphate binding;</p>                                                                                                                                                                                                                                                                                                                                                                                                                                                                                                                                                                                                                                                                                                                                                                                                                                                                                                                                                                                                                                                                                                                                                                                                                                                                                 | K10352 | <p>MYH; myosin heavy chain</p>                                           | <p>dre04530 Tight junction - Danio rerio (zebrafish);</p>                                                                   | <p>IPR002928; IPR004009; IPR001609; IPR027417; IPR027401;</p> | <p>Myosin tail; Myosin, N-terminal, SH3-like; Myosin head, motor domain; P-loop containing nucleoside triphosphate hydrolase; Myosin-like IQ motif-containing domain;</p>                                                                                                                                        |
| A8W6C6 | atp5b                       | ATP synthase subunit beta | _GOK(cr)VLDTGAPIR_        | 113  | 1               | EGLVRGOKVLDTGAP | .....K.L..... | <p>nucleoside metabolic process; purine nucleoside metabolic process; purine ribonucleoside monophosphate metabolic process; nucleoside metabolic process; energy coupled proton transmembrane transport, against electrochemical gradient; single-organism process; biosynthetic process; nucleoside biosynthetic process; purine ribonucleoside biosynthetic process; ribonucleoside monophosphate biosynthetic process; cellular metabolic process; phosphate-containing compound metabolic process; establishment of localization; ribose phosphate biosynthetic process; metabolic process; carbohydrate derivative biosynthetic process; nucleoside phosphate metabolic process; ribose phosphate metabolic process; purine nucleoside triphosphate biosynthetic process; single-organism transport; heterocycle biosynthetic process; purine ribonucleoside triphosphate biosynthetic process; cation transmembrane transport; small molecule metabolic process; ATP biosynthetic process; single-organism cellular process; purine-containing compound metabolic process; organic cyclic compound metabolic process; purine ribonucleoside triphosphate metabolic process; energy coupled proton transport, down electrochemical</p> <p>proton-transporting ATP synthase complex; catalytic core F(1); membrane; membrane part; cell part; intracellular; proton-transporting two-sector ATPase complex; macromolecular complex; proton-transporting two-sector ATPase complex; catalytic domain; intracellular part; protein complex; cell; proton-transporting ATP synthase complex;</p> | <p>ATPase activity, coupled to transmembrane movement of ions; nucleoside phosphate binding; primary active transmembrane transporter activity; substrate-specific transporter activity; hydrolase activity, acting on acid anhydrides; ATPase activity, coupled to transmembrane movement of ions, rotational mechanism; monovalent inorganic cation transmembrane transporter activity; hydrolase activity; hydrogen ion transmembrane transporter activity; substrate-specific transmembrane transporter activity; proton-transporting ATP synthase activity, rotational mechanism; ATPase activity; organic cyclic compound binding; heterocyclic compound binding; cation-transporting ATPase activity; pyrophosphatase activity; catalytic activity; ribonucleotide binding; ATPase activity, coupled to movement of substances; binding; purine ribonucleoside binding; hydrogen-exporting ATPase activity; hydrolase activity, acting on acid anhydrides, catalyzing transmembrane movement of substances; anion binding; adenylyl ribonucleotide binding; adenylyl nucleotide binding; inorganic cation transmembrane transporter activity; hydrolase activity, acting on acid anhydrides, in phosphorus-containing anhydrides; hydrogen-exporting ATPase activity; phosphorylative mechanism; transporter activity; purine nucleotide binding; purine ribonucleoside triphosphate binding; active transmembrane transporter activity; ATP binding; ion transmembrane transporter activity; ion binding; nucleoside binding; nucleotide binding; nucleoside-triphosphatase activity; ribonucleoside binding; ATPase activity, coupled to transmembrane movement of ions, phosphorylative mechanism; P-P-bond-hydrolysis-driven transmembrane transporter activity; carbohydrate derivative binding; ATPase activity, coupled to transmembrane movement of substances; ATPase activity, coupled; purine ribonucleotide binding; purine nucleoside binding; cation transmembrane transporter activity; transmembrane transporter activity; small molecule binding;</p> | K02133 | <p>ATP5F1B; F-type H+-transporting ATPase subunit beta [EC:3.6.3.14]</p> | <p>dre01100 Metabolic pathways - Danio rerio (zebrafish); dre00190 Oxidative phosphorylation - Danio rerio (zebrafish);</p> | <p>IPR000793; IPR004100; IPR000194; IPR027417; IPR024034;</p> | <p>ATPase, F1/V1/A1 complex, alpha/beta subunit, C-terminal; ATPase, F1 complex alpha/beta subunit, N-terminal domain; ATPase, F1/V1/A1 complex, alpha/beta subunit, nucleotide-binding domain; P-loop containing nucleoside triphosphate hydrolase; ATPase, F1 complex beta subunit/V1 complex, C-terminal;</p> |
| B8A568 | myhz1.1                     | Uncharacterized protein   | _GQTVPQVYNSVLSK(cr)SIYER_ | 433  | 1               | NSVLSKSIYERMF   | .....K.L..... | <p>intracellular organelle; intracellular non-membrane-bounded organelle; cytoskeleton part; intracellular organelle part; macromolecular complex; intracellular part; cell; actin cytoskeleton; organelle part; non-membrane-bounded organelle; organelle; cytoskeleton; cell part; intracellular; myosin complex; protein complex;</p>                                                                                                                                                                                                                                                                                                                                                                                                                                                                                                                                                                                                                                                                                                                                                                                                                                                                                                                                                                                                                                                                                                                                                                                                                                                           | <p>ATP binding; motor activity; nucleoside phosphate binding; nucleoside binding; ion binding; hydrolase activity, acting on acid anhydrides; hydrolase activity; nucleotide binding; nucleoside-triphosphatase activity; organic cyclic compound binding; heterocyclic compound binding; ribonucleoside binding; carboxylate derivative binding; pyrophosphatase activity; catalytic activity; ribonucleotide binding; binding; purine ribonucleoside binding; anion binding; purine ribonucleotide binding; adenylyl ribonucleotide binding; adenylyl nucleotide binding; purine nucleoside binding; hydrolase activity, acting on acid anhydrides, in phosphorus-containing anhydrides; purine nucleotide binding; small molecule binding; purine ribonucleoside triphosphate binding;</p>                                                                                                                                                                                                                                                                                                                                                                                                                                                                                                                                                                                                                                                                                                                                                                                                                                                                                                                                                                                                                                                                                                                                                                                                                                                                                 | K10352 | <p>MYH; myosin heavy chain</p>                                           | <p>dre04530 Tight junction - Danio rerio (zebrafish);</p>                                                                   | <p>IPR002928; IPR004009; IPR001609; IPR027417; IPR027401;</p> | <p>Myosin tail; Myosin, N-terminal, SH3-like; Myosin head, motor domain; P-loop containing nucleoside triphosphate hydrolase; Myosin-like IQ motif-containing domain;</p>                                                                                                                                        |



|        |            |                                   |                   |     |   |                 |               |         |                                                                                                                                                                                                                                                                                                                                                                                                                                                                                                                                                                                                                                                                                                                                                                  |                                                                                                                                                                                                                                                                                                                                                                                                                                                                                                                                |                                                                                                             |                                       |                                                                                                                                                                                                                                                                                                                                                             |                                                                                                                                                                                                                      |
|--------|------------|-----------------------------------|-------------------|-----|---|-----------------|---------------|---------|------------------------------------------------------------------------------------------------------------------------------------------------------------------------------------------------------------------------------------------------------------------------------------------------------------------------------------------------------------------------------------------------------------------------------------------------------------------------------------------------------------------------------------------------------------------------------------------------------------------------------------------------------------------------------------------------------------------------------------------------------------------|--------------------------------------------------------------------------------------------------------------------------------------------------------------------------------------------------------------------------------------------------------------------------------------------------------------------------------------------------------------------------------------------------------------------------------------------------------------------------------------------------------------------------------|-------------------------------------------------------------------------------------------------------------|---------------------------------------|-------------------------------------------------------------------------------------------------------------------------------------------------------------------------------------------------------------------------------------------------------------------------------------------------------------------------------------------------------------|----------------------------------------------------------------------------------------------------------------------------------------------------------------------------------------------------------------------|
| F1R8K3 |            | Pyruvate kinase                   | _GSQTTEEK(cr)VK_  | 132 | 1 | GSQTTEEKVLKQNI  | .....K.V..... | cytosol | single-organism carbohydrate catabolic process; glycolytic process; single-organism catabolic process; small molecule metabolic process; single-organism cellular process; single-organism process; carbohydrate metabolic process; primary metabolic process; cellular metabolic process; organic substance metabolic process; carbohydrate catabolic process; single-organism carbohydrate metabolic process; organic substance catabolic process; metabolic process; pyruvate metabolic process; generation of precursor metabolites and energy; single-organism metabolic process; carboxylic acid metabolic process; monocarboxylic acid metabolic process; organic acid metabolic process; cellular process; catabolic process; oxoacid metabolic process; | magnesium ion binding; pyruvate kinase activity; kinase activity; phosphotransferase activity, alcohol group as acceptor; catalytic activity; binding; ion binding; potassium ion binding; metal ion binding; cation binding; alkali metal ion binding; transferase activity; transferase activity, transferring phosphorus-containing groups;                                                                                                                                                                                 | K00873                                                                                                      | PK pyruvate kinase [EC:2.7.1.40]      | dre00010 Glycolysis / Gluconeogenesis - Danio rerio (zebrafish); dre01230 Biosynthesis of amino acids - Danio rerio (zebrafish); dre01200 Carbon metabolism - Danio rerio (zebrafish); dre01100 Metabolic pathways - Danio rerio (zebrafish); dre00620 Pyruvate metabolism - Danio rerio (zebrafish); dre00230 Purine metabolism - Danio rerio (zebrafish); | Pyruvate kinase, alpha/beta; Pyruvate kinase-like, insert domain; Pyruvate/Phosphoenolpyruvate kinase-like domain; Pyruvate kinase, beta-barrel insert domain; Pyruvate kinase, C-terminal; Pyruvate kinase, barrel; |
| Q6NYR4 | hspa8      | Heat shock cognate 71 kDa protein | _GTLDPVEK(cr)ALR_ | 319 | 1 | GTLDPVEKALRDKM  | .....K.L..... | cytosol | response to stress; response to stimulus;                                                                                                                                                                                                                                                                                                                                                                                                                                                                                                                                                                                                                                                                                                                        | ATP binding; nucleoside phosphate binding; nucleoside binding; ion binding; nucleotide binding; organic cyclic compound binding; heterocyclic compound binding; ribonucleoside binding; carbohydrate derivative binding; ribonucleotide binding; binding; purine ribonucleoside binding; anion binding; purine ribonucleotide binding; adenylyl ribonucleotide binding; adenylyl nucleotide binding; purine nucleoside binding; purine nucleotide binding; small molecule binding; purine ribonucleoside triphosphate binding; | K03283                                                                                                      | HSPA1.8; heat shock 70kDa protein 1/8 | dre04010 MAPK signaling pathway - Danio rerio (zebrafish); dre04141 Protein processing in endoplasmic reticulum - Danio rerio (zebrafish); dre04144 Endocytosis - Danio rerio (zebrafish); dre03040 Spliceosome - Danio rerio (zebrafish);                                                                                                                  | Heat shock protein 70kD, C-terminal domain; Heat shock protein 70kD, peptide-binding domain;                                                                                                                         |
| Q90473 | hspa8      | Heat shock cognate 71 kDa protein | _GTLDPVEK(cr)ALR_ | 319 | 1 | GTLDPVEKALRDKM  | .....K.L..... | cytosol | developmental process; response to wounding; tissue development; response to stress; wound healing; tissue regeneration; single-organism developmental process; fin regeneration; single-organism process; regeneration; developmental growth; response to stimulus; growth; anatomical structure development;                                                                                                                                                                                                                                                                                                                                                                                                                                                   | ATP binding; nucleoside phosphate binding; nucleoside binding; ion binding; nucleotide binding; organic cyclic compound binding; heterocyclic compound binding; ribonucleoside binding; carbohydrate derivative binding; ribonucleotide binding; binding; purine ribonucleoside binding; anion binding; purine ribonucleotide binding; adenylyl ribonucleotide binding; adenylyl nucleotide binding; purine nucleoside binding; purine nucleotide binding; small molecule binding; purine ribonucleoside triphosphate binding; | K03283                                                                                                      | HSPA1.8; heat shock 70kDa protein 1/8 | dre04010 MAPK signaling pathway - Danio rerio (zebrafish); dre04141 Protein processing in endoplasmic reticulum - Danio rerio (zebrafish); dre04144 Endocytosis - Danio rerio (zebrafish); dre03040 Spliceosome - Danio rerio (zebrafish);                                                                                                                  | Heat shock protein 70kD, C-terminal domain; Heat shock protein 70kD, peptide-binding domain;                                                                                                                         |
| E9QBQ4 | aldob      | Fructose-bisphosphate aldolase    | _GVLFPK(cr)VK_    | 96  | 1 | DKGVLPKVKDKGI   | .....K.L..... | cytosol | single-organism carbohydrate catabolic process; glycolytic process; single-organism catabolic process; small molecule metabolic process; single-organism cellular process; single-organism process; carbohydrate metabolic process; primary metabolic process; cellular metabolic process; organic substance metabolic process; carbohydrate catabolic process; single-organism carbohydrate metabolic process; organic substance catabolic process; metabolic process; pyruvate metabolic process; generation of precursor metabolites and energy; single-organism metabolic process; carboxylic acid metabolic process; monocarboxylic acid metabolic process; organic acid metabolic process; cellular process; catabolic process; oxoacid metabolic process; | lyase activity; fructose-bisphosphate aldolase activity; aldehyde-lyase activity; catalytic activity; carbon-carbon lyase activity;                                                                                                                                                                                                                                                                                                                                                                                            |                                                                                                             |                                       | IPR013785; Aldolase-type TIM barrel;                                                                                                                                                                                                                                                                                                                        |                                                                                                                                                                                                                      |
| E7F225 | zgc:163061 | Uncharacterized protein           | _GVLK(cr)QVK_     | 86  | 1 | MVTGVLKQVKGTGA  | .....K.V..... | nuclear | cellular component biogenesis; cellular component organization; nucleosome organization; cellular macromolecular complex assembly; chromatin assembly or disassembly; protein complex subunit organization; macromolecular complex subunit organization; protein-DNA complex assembly; DNA packaging; nucleosome assembly; chromosome organization; cellular component assembly; macromolecular complex assembly; organelle organization; chromatin organization; protein complex biogenesis; chromatin assembly; cellular process; protein complex assembly; cellular component organization or biogenesis; protein-DNA complex subunit organization; DNA conformation change;                                                                                  | intracellular organelle; intracellular non-membrane-bounded organelle; intracellular organelle part; macromolecular complex; intracellular part; cell; organelle part; DNA bending complex; chromosomal part; nucleosome; non-membrane-bounded organelle; intracellular membrane-bounded organelle; organelle; nucleus; chromatin; cell part; intracellular; chromosome; membrane-bounded organelle; protein complex; protein-DNA complex; DNA packaging complex;                                                              | organic cyclic compound binding; heterocyclic compound binding; DNA binding; binding; nucleic acid binding; | K11275                                |                                                                                                                                                                                                                                                                                                                                                             | IPR011991; IPR005818; Winged helix-turn-helix DNA-binding domain; Linker histone H1/H5, domain H15;                                                                                                                  |
| E7FC7  |            | Histone H4                        | _GVLK(cr)VLENVR_  | 60  | 1 | EETRGVLKVFLENVI |               | nuclear | cellular component biogenesis; cellular component organization; nucleosome organization; cellular macromolecular complex assembly; chromatin assembly or disassembly; protein complex subunit organization; macromolecular complex subunit organization; protein-DNA complex assembly; DNA packaging; nucleosome assembly; chromosome organization; cellular component assembly; macromolecular complex assembly; organelle organization; chromatin organization; protein complex biogenesis; chromatin assembly; cellular process; protein complex assembly; cellular component organization or biogenesis; protein-DNA complex subunit organization; DNA conformation change;                                                                                  | intracellular organelle; intracellular non-membrane-bounded organelle; intracellular organelle part; macromolecular complex; intracellular part; cell; organelle part; DNA bending complex; chromosomal part; nucleosome; non-membrane-bounded organelle; intracellular membrane-bounded organelle; organelle; nucleus; chromatin; cell part; intracellular; chromosome; membrane-bounded organelle; protein complex; protein-DNA complex; DNA packaging complex;                                                              | organic cyclic compound binding; heterocyclic compound binding; DNA binding; binding; nucleic acid binding; |                                       | IPR009072; IPR007125; Histone-fold; Histone core;                                                                                                                                                                                                                                                                                                           |                                                                                                                                                                                                                      |

|        |        |                                    |                   |       |   |                               |              |                                                                                                                                                                                                                                                                                                                                                                                                                                                                                                                                                                                                                                                                                                                                                                                                                                                                                                                                                                                                                                                                                                                                                                                                                                                                                                                                                                                                                                                                                                                                                                              |                                                                                                                                                                                                                                                                                                                                                                                                                                                                                                                                                                                                                                                                                                                                                                                                                                                                                                                                                                                                                                                                                                                                                                                                                                                                                                                                                                                                                                                                                                                                                                                                                                                                                                                                                                                                                                                                                                                                                                                                                                             |                                        |                                                                                                                            |                                                                                                                                                                                                  |                                                                                                                                                                    |                                                                                                                                                                                                                 |
|--------|--------|------------------------------------|-------------------|-------|---|-------------------------------|--------------|------------------------------------------------------------------------------------------------------------------------------------------------------------------------------------------------------------------------------------------------------------------------------------------------------------------------------------------------------------------------------------------------------------------------------------------------------------------------------------------------------------------------------------------------------------------------------------------------------------------------------------------------------------------------------------------------------------------------------------------------------------------------------------------------------------------------------------------------------------------------------------------------------------------------------------------------------------------------------------------------------------------------------------------------------------------------------------------------------------------------------------------------------------------------------------------------------------------------------------------------------------------------------------------------------------------------------------------------------------------------------------------------------------------------------------------------------------------------------------------------------------------------------------------------------------------------------|---------------------------------------------------------------------------------------------------------------------------------------------------------------------------------------------------------------------------------------------------------------------------------------------------------------------------------------------------------------------------------------------------------------------------------------------------------------------------------------------------------------------------------------------------------------------------------------------------------------------------------------------------------------------------------------------------------------------------------------------------------------------------------------------------------------------------------------------------------------------------------------------------------------------------------------------------------------------------------------------------------------------------------------------------------------------------------------------------------------------------------------------------------------------------------------------------------------------------------------------------------------------------------------------------------------------------------------------------------------------------------------------------------------------------------------------------------------------------------------------------------------------------------------------------------------------------------------------------------------------------------------------------------------------------------------------------------------------------------------------------------------------------------------------------------------------------------------------------------------------------------------------------------------------------------------------------------------------------------------------------------------------------------------------|----------------------------------------|----------------------------------------------------------------------------------------------------------------------------|--------------------------------------------------------------------------------------------------------------------------------------------------------------------------------------------------|--------------------------------------------------------------------------------------------------------------------------------------------------------------------|-----------------------------------------------------------------------------------------------------------------------------------------------------------------------------------------------------------------|
| A8WGC6 | atp5b  | ATP synthase subunit beta          | _GVQK(cr)ILQDYK_  | 415   | 1 | DVARGVQKIQDYKS .....K.L.....  | mitochondria | nucleoside metabolic process; purine nucleoside metabolic process; purine ribonucleoside monophosphate metabolic process; nucleotide metabolic process; energy coupled proton transmembrane transport, against electrochemical gradient; single-organism process; biosynthetic process; nucleoside biosynthetic process; purine ribonucleoside biosynthetic process; ribonucleoside monophosphate biosynthetic process; cellular metabolic process; phosphate-containing compound metabolic process; establishment of localization; ribose phosphate biosynthetic process; metabolic process; carbohydrate derivative biosynthetic process; nucleoside phosphate metabolic process; ribose phosphate metabolic process; purine nucleoside triphosphate biosynthetic process; single-organism transport; heterocyclic biosynthetic process; purine ribonucleoside triphosphate biosynthetic process; cation transmembrane transport; small molecule metabolic process; ATP biosynthetic process; single-organism cellular process; purine-containing compound metabolic process; organic cyclic compound metabolic process; purine ribonucleoside triphosphate metabolic process; energy coupled proton transport; proton transmembrane transport; ATP synthase complex; catalytic core F(1); membrane; membrane part; cell part; intracellular; proton-transporting two-sector ATPase complex; macromolecular complex; proton-transporting two-sector ATPase complex; catalytic domain; intracellular part; protein complex; cell; proton-transporting ATP synthase complex; | ATPase activity, coupled to transmembrane movement of ions; nucleoside phosphate binding; primary active transmembrane transporter activity; substrate-specific transporter activity; hydrolase activity, acting on acid anhydrides; ATPase activity, coupled to transmembrane movement of ions, rotational mechanism; monovalent inorganic cation transmembrane transporter activity; hydrolase activity; hydrogen ion transmembrane transporter activity; substrate-specific transmembrane transporter activity; proton-transporting ATP synthase activity, rotational mechanism; ATPase activity; organic cyclic compound binding; heterocyclic compound binding; cation-transporting ATPase activity; pyrophosphatase activity; catalytic activity; ribonucleotide binding; ATPase activity, coupled to movement of substances; binding; purine ribonucleoside binding; hydrogen-exporting ATPase activity; hydrolase activity, acting on acid anhydrides, catalyzing transmembrane movement of substances; anion binding; adenyl ribonucleotide binding; adenyl nucleotide binding; inorganic cation transmembrane transporter activity; hydrolase activity, acting on acid anhydrides, in phosphorus-containing anhydrides; hydrogen-exporting ATPase activity, phosphorylative mechanism; transporter activity; purine nucleotide binding; purine ribonucleoside triphosphate binding; active transmembrane transporter activity; ATP binding; ion transmembrane transporter activity; ion binding; nucleoside binding; nucleoside triphosphate binding; ribonucleoside binding; ATPase activity, coupled to transmembrane movement of ions, phosphorylative mechanism; P-P-bond-hydrolysis-driven transmembrane transporter activity; carbohydrate derivative binding; ATPase activity, coupled to transmembrane movement of substances; ATPase activity, coupled; purine ribonucleotide binding; purine nucleoside binding; cation transmembrane transporter activity; transmembrane transporter activity; small molecule binding; | K02133                                 | ATP+P1B; P-type H+ transportin g ATPase subunit beta [EC:3.6.3.14]                                                         | dre01100 Metabolic pathways - Danio rerio (zebrafish); dre00190 Oxidative phosphorylation - Danio rerio (zebrafish);                                                                             | IPR000793; IPR004100; IPR000194; IPR027417; IPR024034;                                                                                                             | ATPase, F1/V1/A1 complex; alpha/beta subunit, C-terminal; ATPase, F1 complex; alpha/beta subunit, N-terminal domain; ATPase, F1/V1/A1 complex; alpha/beta subunit, complex beta subunit/V1 complex, C-terminal; |
| G1KXZ0 | tnb    | Uncharacterized protein (Fragment) | _GVTSK(cr)VK_     | 27496 | 1 | QRGVTSKVKIAPFE                | nuclear      | ATP binding; nucleoside phosphate binding; phosphotransferase activity, alcohol group as acceptor; nucleoside binding; ion binding; protein tyrosine kinase activity; protein kinase activity; nucleotide binding; organic cyclic compound binding; heterocyclic compound binding; ribonucleoside binding; carbohydrate derivative binding; kinase activity; catalytic activity; ribonucleotide binding; binding; nucleic acid binding; purine ribonucleoside binding; anion binding; purine ribonucleotide binding; adenyl ribonucleotide binding; adenyl nucleotide binding; purine nucleoside binding; transferase activity; transferring phosphorus-containing groups; purine nucleotide binding; small molecule binding; purine ribonucleoside triphosphate binding;                                                                                                                                                                                                                                                                                                                                                                                                                                                                                                                                                                                                                                                                                                                                                                                                    | K12567                                                                                                                                                                                                                                                                                                                                                                                                                                                                                                                                                                                                                                                                                                                                                                                                                                                                                                                                                                                                                                                                                                                                                                                                                                                                                                                                                                                                                                                                                                                                                                                                                                                                                                                                                                                                                                                                                                                                                                                                                                      |                                        | IPR003598; IPR007110; IPR000719; IPR013783; IPR003599; IPR003961; IPR013098; IPR011009;                                    | Immunoglobulin subtype 2; Immunoglobulin-like domain; Protein kinase; Immunoglobulin-like fold; Immunoglobulin subunit; Fibronectin, type III; Immunoglobulin I-set; Protein kinase-like domain; |                                                                                                                                                                    |                                                                                                                                                                                                                 |
| B8A568 | myh3.1 | Uncharacterized protein            | _HATENK(cr)VK_    | 976   | 1 | EKHATENKVNLTTEE               | nuclear      | ATP binding; motor activity; nucleoside phosphate binding; nucleoside binding; ion binding; hydrolase activity, acting on acid anhydrides; hydrolase activity; nucleotide binding; nucleoside-triphosphatase activity; organic cyclic compound binding; heterocyclic compound binding; ribonucleoside binding; carbohydrate derivative binding; pyrophosphatase activity; catalytic activity; ribonucleotide binding; binding; purine ribonucleoside binding; anion binding; purine ribonucleotide binding; adenyl ribonucleotide binding; adenyl nucleotide binding; purine nucleoside binding; hydrolase activity, acting on acid anhydrides, in phosphorus-containing anhydrides; purine nucleotide binding; small molecule binding; purine ribonucleoside triphosphate binding;                                                                                                                                                                                                                                                                                                                                                                                                                                                                                                                                                                                                                                                                                                                                                                                          | K10352                                                                                                                                                                                                                                                                                                                                                                                                                                                                                                                                                                                                                                                                                                                                                                                                                                                                                                                                                                                                                                                                                                                                                                                                                                                                                                                                                                                                                                                                                                                                                                                                                                                                                                                                                                                                                                                                                                                                                                                                                                      | MYH; myosin heavy chain                | dre04630 Tight junction - Danio rerio (zebrafish);                                                                         | IPR002928; IPR004009; IPR001609; IPR027417; IPR027401;                                                                                                                                           | Myosin tail; Myosin, N-terminal, SH3-like; Myosin head, motor domain; p-loop containing nucleoside triphosphate hydrolase; Myosin-like IQ motif-containing domain; |                                                                                                                                                                                                                 |
| B8A561 | myh3.2 | Uncharacterized protein            | _HATENK(cr)VK_    | 976   | 1 | EKHATENKVNLTTEE               | nuclear      | ATP binding; motor activity; nucleoside phosphate binding; nucleoside binding; ion binding; hydrolase activity, acting on acid anhydrides; hydrolase activity; nucleotide binding; nucleoside-triphosphatase activity; organic cyclic compound binding; heterocyclic compound binding; ribonucleoside binding; carbohydrate derivative binding; pyrophosphatase activity; catalytic activity; ribonucleotide binding; binding; purine ribonucleoside binding; anion binding; purine ribonucleotide binding; adenyl ribonucleotide binding; adenyl nucleotide binding; purine nucleoside binding; hydrolase activity, acting on acid anhydrides, in phosphorus-containing anhydrides; purine nucleotide binding; small molecule binding; purine ribonucleoside triphosphate binding;                                                                                                                                                                                                                                                                                                                                                                                                                                                                                                                                                                                                                                                                                                                                                                                          | K10352                                                                                                                                                                                                                                                                                                                                                                                                                                                                                                                                                                                                                                                                                                                                                                                                                                                                                                                                                                                                                                                                                                                                                                                                                                                                                                                                                                                                                                                                                                                                                                                                                                                                                                                                                                                                                                                                                                                                                                                                                                      | MYH; myosin heavy chain                | dre04630 Tight junction - Danio rerio (zebrafish);                                                                         | IPR002928; IPR004009; IPR001609; IPR027417; IPR027401;                                                                                                                                           | Myosin tail; Myosin, N-terminal, SH3-like; Myosin head, motor domain; p-loop containing nucleoside triphosphate hydrolase; Myosin-like IQ motif-containing domain; |                                                                                                                                                                                                                 |
| Q8AY63 | ckbb   | Brain-subtype creatine kinase      | _HEK(cr)FGEILK_   | 307   | 1 | PNVSKHEKFGELKR                | cytosol      | ATP binding; nucleoside phosphate binding; creatine kinase activity; nucleoside binding; ion binding; phosphotransferase activity; nitrogenous group as acceptor; nucleotide binding; organic cyclic compound binding; heterocyclic compound binding; ribonucleoside binding; carbohydrate derivative binding; kinase activity; catalytic activity; ribonucleotide binding; binding; purine ribonucleoside binding; anion binding; purine ribonucleotide binding; adenyl ribonucleotide binding; adenyl nucleotide binding; purine nucleoside binding; transferase activity; transferring phosphorus-containing groups; purine nucleotide binding; small molecule binding; purine ribonucleoside triphosphate binding;                                                                                                                                                                                                                                                                                                                                                                                                                                                                                                                                                                                                                                                                                                                                                                                                                                                       | K00933                                                                                                                                                                                                                                                                                                                                                                                                                                                                                                                                                                                                                                                                                                                                                                                                                                                                                                                                                                                                                                                                                                                                                                                                                                                                                                                                                                                                                                                                                                                                                                                                                                                                                                                                                                                                                                                                                                                                                                                                                                      | E2.7.3.2; creatine kinase [EC:2.7.3.2] | dre00330 Arginine and proline metabolism - Danio rerio (zebrafish); dre01100 Metabolic pathways - Danio rerio (zebrafish); | ATP-guanido phosphotransferase, N-terminal; Glutamine synthetase/guanido kinase, catalytic domain; ATP-guanido phosphotransferase, catalytic domain;                                             |                                                                                                                                                                    |                                                                                                                                                                                                                 |
| A2BHA3 | ckma   | Uncharacterized protein            | _HNNHMAK(cr)VLTK_ | 32    | 1 | KHNNHMAKVLTKEMY .....K.L..... | cytosol      | ATP binding; nucleoside phosphate binding; nucleoside binding; ion binding; nucleotide binding; organic cyclic compound binding; heterocyclic compound binding; ribonucleoside binding; carbohydrate derivative binding; kinase activity; catalytic activity; ribonucleotide binding; binding; purine ribonucleoside binding; anion binding; purine ribonucleotide binding; adenyl ribonucleotide binding; adenyl nucleotide binding; purine nucleoside binding; transferase activity; transferring phosphorus-containing groups; purine nucleotide binding; small molecule binding; purine ribonucleoside triphosphate binding;                                                                                                                                                                                                                                                                                                                                                                                                                                                                                                                                                                                                                                                                                                                                                                                                                                                                                                                                             | K00933                                                                                                                                                                                                                                                                                                                                                                                                                                                                                                                                                                                                                                                                                                                                                                                                                                                                                                                                                                                                                                                                                                                                                                                                                                                                                                                                                                                                                                                                                                                                                                                                                                                                                                                                                                                                                                                                                                                                                                                                                                      | E2.7.3.2; creatine kinase [EC:2.7.3.2] | dre00330 Arginine and proline metabolism - Danio rerio (zebrafish); dre01100 Metabolic pathways - Danio rerio (zebrafish); | ATP-guanido phosphotransferase, N-terminal; ATP-guanido phosphotransferase, catalytic domain; Glutamine synthetase/guanido kinase, catalytic domain;                                             |                                                                                                                                                                    |                                                                                                                                                                                                                 |

|        |           |                                                 |                           |     |   |                   |               |               |                                                                                                                                                                                                                                                                                                                                                                                                                                                                                                                                                                                                                                                                                                                                                                                                                                                                                                                                                                                                                                                                                                                                                                                                                                                                                                                     |                                                                                                                                                                                                                                                                                                                                                                                                                                                                                                                                                                                                                                                                                                                                                                                        |                                                                                                             |                                                                                                                                                                                                                                                                                                       |                                                                               |
|--------|-----------|-------------------------------------------------|---------------------------|-----|---|-------------------|---------------|---------------|---------------------------------------------------------------------------------------------------------------------------------------------------------------------------------------------------------------------------------------------------------------------------------------------------------------------------------------------------------------------------------------------------------------------------------------------------------------------------------------------------------------------------------------------------------------------------------------------------------------------------------------------------------------------------------------------------------------------------------------------------------------------------------------------------------------------------------------------------------------------------------------------------------------------------------------------------------------------------------------------------------------------------------------------------------------------------------------------------------------------------------------------------------------------------------------------------------------------------------------------------------------------------------------------------------------------|----------------------------------------------------------------------------------------------------------------------------------------------------------------------------------------------------------------------------------------------------------------------------------------------------------------------------------------------------------------------------------------------------------------------------------------------------------------------------------------------------------------------------------------------------------------------------------------------------------------------------------------------------------------------------------------------------------------------------------------------------------------------------------------|-------------------------------------------------------------------------------------------------------------|-------------------------------------------------------------------------------------------------------------------------------------------------------------------------------------------------------------------------------------------------------------------------------------------------------|-------------------------------------------------------------------------------|
| F1Q6K1 | smarcc1a  | Uncharacterized protein                         | _HOGTITEDK(cr)SK_         | 196 | 1 | OGTITEDKSKATHII   | .....DK.....  | nuclear       | organelle; intracellular membrane-bounded organelle; intracellular organelle; nucleus; cell part; intracellular; intracellular part; membrane-bounded organelle; cell;                                                                                                                                                                                                                                                                                                                                                                                                                                                                                                                                                                                                                                                                                                                                                                                                                                                                                                                                                                                                                                                                                                                                              | organic cyclic compound binding; heterocyclic compound binding; DNA binding; binding; nucleic acid binding; macromolecular complex binding; chromatin binding;                                                                                                                                                                                                                                                                                                                                                                                                                                                                                                                                                                                                                         | K11649                                                                                                      | SANT/Myb domain; Winged helix-turn-helix domain; DNA-binding domain; Homeodomain-like; SWIRM1 domain; SANT domain; Chromo domain/shadow; BRCT domain;                                                                                                                                                 |                                                                               |
| F6NL16 | ppib      | Peptidyl-prolyl cis-trans isomerase             | _HVVFGK(cr)LEGMDVVR_      | 163 | 1 | GKHVVFQKLEGMDV    | .....K.L..... | extracellular |                                                                                                                                                                                                                                                                                                                                                                                                                                                                                                                                                                                                                                                                                                                                                                                                                                                                                                                                                                                                                                                                                                                                                                                                                                                                                                                     |                                                                                                                                                                                                                                                                                                                                                                                                                                                                                                                                                                                                                                                                                                                                                                                        | K03768                                                                                                      | Cyclophilin-type peptidyl-prolyl cis-trans isomerase domain; Cyclophilin-like domain;                                                                                                                                                                                                                 |                                                                               |
| B8JKN7 | ppiaa     | Uncharacterized protein                         | _HVVFGQVVEGLDVK(cr)K_     | 80  | 1 | VEGLDVKKEVGFSG    | .....K.V..... | extracellular | cellular protein metabolic process; protein peptidyl-prolyl isomerization; peptidyl-proline modification; primary metabolic process; cellular metabolic process; organic substance metabolic process; protein folding; peptidyl-amino acid modification; metabolic process; cellular macromolecule metabolic process; cellular protein modification process; protein folding; peptidyl-amino acid modification; metabolic process; cellular macromolecule metabolic process; macromolecule modification; protein modification process; cellular process; developmental process; cellular component organization; single-multicellular organism process; morphogenesis of an epithelium; epithelium development; epiboly involved in gastrulation with mouth forming second; tissue development; organelle fission; epiboly; morphogenesis of an epithelial sheet; single-organism process; multicellular organismal process; gastrulation; anatomical structure morphogenesis; gastrulation with mouth forming second; tissue morphogenesis; organelle organization; single-organism developmental process; nuclear division; multicellular organismal development; embryo development; cellular process; anatomical structure development; embryonic morphogenesis; cellular component organization or biogenesis; | peptidyl-prolyl cis-trans isomerase activity; isomerase activity; catalytic activity; cis-trans isomerase activity;                                                                                                                                                                                                                                                                                                                                                                                                                                                                                                                                                                                                                                                                    |                                                                                                             | Cyclophilin-type peptidyl-prolyl cis-trans isomerase domain; Cyclophilin-like domain;                                                                                                                                                                                                                 |                                                                               |
| B3DFP9 | apoa2     | Uncharacterized protein                         | _JAGGLASELEPVVDK(cr)AR_   | 101 | 1 | ELEPVVDKARLNALG   | .....DK.....  | extracellular | developmental process; cellular component organization; single-multicellular organism process; morphogenesis of an epithelium; epithelium development; epiboly involved in gastrulation with mouth forming second; tissue development; organelle fission; epiboly; morphogenesis of an epithelial sheet; single-organism process; multicellular organismal process; gastrulation; anatomical structure morphogenesis; gastrulation with mouth forming second; tissue morphogenesis; organelle organization; single-organism developmental process; nuclear division; multicellular organismal development; embryo development; cellular process; anatomical structure development; embryonic morphogenesis; cellular component organization or biogenesis;                                                                                                                                                                                                                                                                                                                                                                                                                                                                                                                                                          |                                                                                                                                                                                                                                                                                                                                                                                                                                                                                                                                                                                                                                                                                                                                                                                        |                                                                                                             |                                                                                                                                                                                                                                                                                                       |                                                                               |
| Q6IQV0 | zgc:86598 | Uncharacterized protein                         | _IAK(cr)VLGTEDLYDYDK_     | 247 | 1 | DQLVRIAKVLGTEDL   | .....K.L..... | nuclear       |                                                                                                                                                                                                                                                                                                                                                                                                                                                                                                                                                                                                                                                                                                                                                                                                                                                                                                                                                                                                                                                                                                                                                                                                                                                                                                                     | ATP binding; nucleoside phosphate binding; phosphotransferase activity, alcohol group as acceptor; nucleoside binding; ion binding; protein kinase activity; nucleotide binding; organic cyclic compound binding; heterocyclic compound binding; ribonucleoside binding; carbohydrate derivative binding; kinase activity; catalytic activity; ribonucleotide binding; binding; purine ribonucleoside binding; protein serine/threonine kinase activity; antion binding; purine ribonucleotide binding; adenylyl ribonucleotide binding; adenylyl nucleotide binding; purine nucleoside binding; transferase activity; transferase activity, transferring phosphorus-containing groups; purine nucleotide binding; small molecule binding; purine ribonucleoside triphosphate binding; | K03097                                                                                                      | dre04310 Wnt signaling pathway - Danio rerio (zebrafish); dre05168 Herpes simplex infection - Danio rerio (zebrafish); dre04530 Tight junction - Danio rerio (zebrafish); dre03008 Ribosome biogenesis in eukaryotes - Danio rerio (zebrafish); dre04520 Adherens junction - Danio rerio (zebrafish); |                                                                               |
| A3KPR3 | histh11   | Uncharacterized protein                         | _IALK(cr)ALVK_            | 75  | 1 | SRVKIALKALVKRGA   | .....K.L..... | nuclear       | cellular component biogenesis; cellular component organization; nucleosome organization; cellular macromolecular complex assembly; chromatin assembly or disassembly; protein complex subunit organization; macromolecular complex subunit organization; protein-DNA complex assembly; DNA packaging; nucleosome assembly; chromosome organization; cellular component assembly; macromolecular complex assembly; organelle organization; chromatin organization; protein complex biogenesis; chromatin assembly; cellular process; protein complex assembly; cellular component organization or biogenesis; protein-DNA complex subunit organization; DNA conformation change;                                                                                                                                                                                                                                                                                                                                                                                                                                                                                                                                                                                                                                     | intracellular organelle; intracellular non-membrane-bounded organelle; intracellular organelle part; macromolecular complex; intracellular part; cell; organelle part; DNA bending complex; chromosomal part; nucleosome; non-membrane-bounded organelle; intracellular membrane-bounded organelle; organelle; nucleus; chromatin; cell part; intracellular; chromosome; membrane-bounded organelle; protein complex; protein-DNA complex; DNA packaging complex;                                                                                                                                                                                                                                                                                                                      | organic cyclic compound binding; heterocyclic compound binding; DNA binding; binding; nucleic acid binding; | K11275                                                                                                                                                                                                                                                                                                | Winged helix-turn-helix DNA-binding domain; Linker histone H1/H5, domain H15; |
| B8JKH7 | myt3      | Uncharacterized protein                         | _IDFEAFLPMLK(cr)TV DANQK_ | 100 | 1 | EAFPLPMLKTV DANQK | .....K.V..... | mitochondria  |                                                                                                                                                                                                                                                                                                                                                                                                                                                                                                                                                                                                                                                                                                                                                                                                                                                                                                                                                                                                                                                                                                                                                                                                                                                                                                                     | cation binding; metal ion binding; calcium ion binding; binding; ion binding;                                                                                                                                                                                                                                                                                                                                                                                                                                                                                                                                                                                                                                                                                                          |                                                                                                             | IPR002048; IPR011992; EF-hand domain; EF-hand domain pair;                                                                                                                                                                                                                                            |                                                                               |
| Q918U7 | myt3      | Fast skeletal muscle myosin light polypeptide 3 | _IDFEAFLPMLK(cr)TV DANQK_ | 76  | 1 | EAFPLPMLKTV DANQK | .....K.V..... | cytosol       |                                                                                                                                                                                                                                                                                                                                                                                                                                                                                                                                                                                                                                                                                                                                                                                                                                                                                                                                                                                                                                                                                                                                                                                                                                                                                                                     | cation binding; metal ion binding; calcium ion binding; binding; ion binding;                                                                                                                                                                                                                                                                                                                                                                                                                                                                                                                                                                                                                                                                                                          |                                                                                                             | IPR011992; IPR002048; EF-hand domain pair; EF-hand domain;                                                                                                                                                                                                                                            |                                                                               |

|        |          |                                                   |                      |      |   |                 |               |              |                                                                                                                                                                                                                                                                                                                                                                                                                                                                                                                                                                                                                                                                                                                                                                  |                                                                                                                                                                                                                                                                                                                                   |                                                                                                                                                                                                                                                                                                                                                                                                                                                                                                                                                                                                                                                                                                                                                                                         |        |                            |                                                                                                                                                                                                                                                                                                   |                                                        |                                                                                                                                                                   |
|--------|----------|---------------------------------------------------|----------------------|------|---|-----------------|---------------|--------------|------------------------------------------------------------------------------------------------------------------------------------------------------------------------------------------------------------------------------------------------------------------------------------------------------------------------------------------------------------------------------------------------------------------------------------------------------------------------------------------------------------------------------------------------------------------------------------------------------------------------------------------------------------------------------------------------------------------------------------------------------------------|-----------------------------------------------------------------------------------------------------------------------------------------------------------------------------------------------------------------------------------------------------------------------------------------------------------------------------------|-----------------------------------------------------------------------------------------------------------------------------------------------------------------------------------------------------------------------------------------------------------------------------------------------------------------------------------------------------------------------------------------------------------------------------------------------------------------------------------------------------------------------------------------------------------------------------------------------------------------------------------------------------------------------------------------------------------------------------------------------------------------------------------------|--------|----------------------------|---------------------------------------------------------------------------------------------------------------------------------------------------------------------------------------------------------------------------------------------------------------------------------------------------|--------------------------------------------------------|-------------------------------------------------------------------------------------------------------------------------------------------------------------------|
| Q6TH14 |          | Enolase                                           | _IDK(cr)FMLELDGTENK_ | 126  | 1 | CKAGAAEKGVPLRYH | .....K.V..... | mitochondria | single-organism carbohydrate catabolic process; glycolytic process; single-organism catabolic process; small molecule metabolic process; single-organism cellular process; single-organism process; carbohydrate metabolic process; primary metabolic process; cellular metabolic process; organic substance metabolic process; carbohydrate catabolic process; single-organism carbohydrate metabolic process; organic substance catabolic process; metabolic process; pyruvate metabolic process; generation of precursor metabolites and energy; single-organism metabolic process; carboxylic acid metabolic process; monocarboxylic acid metabolic process; organic acid metabolic process; cellular process; catabolic process; oxoacid metabolic process; | catalytic complex; cell part; intracellular; cytoplasm; macromolecular complex; intracellular part; cytosolic part; cell; cytosol; protein complex; phosphopyruvate hydratase complex; cytoplasmic part;                                                                                                                          | magnesium ion binding; phosphopyruvate hydratase activity; catalytic activity; binding; ion binding; metal ion binding; cation binding; lyase activity; hydro-lyase activity; carbon-oxygen lyase activity;                                                                                                                                                                                                                                                                                                                                                                                                                                                                                                                                                                             | K01689 | ENO; enolase [EC:4.2.1.11] | dre00010 Glycolysis / Gluconeogenesis - Danio rerio (zebrafish); dre01230 Biosynthesis of amino acids - Danio rerio (zebrafish); dre01200 Carbon metabolism - Danio rerio (zebrafish); dre01100 Metabolic pathways - Danio rerio (zebrafish); dre03018 RNA degradation - Danio rerio (zebrafish); | IPR029065; IPR020810; IPR029017; IPR020811;            | Enolase C-terminal domain-like; Enolase N-terminal; Enolase domain-like; Enolase N-terminal;                                                                      |
| Q6IQX1 | myh2     | Myosin, heavy polypeptide 2, fast muscle specific | _IEDEQSLGAQLQK(cr)K_ | 1108 | 1 | SLGAQLQKKIKELQA | .....K.L....  | cytosol      | response to stress; response to stimulus;                                                                                                                                                                                                                                                                                                                                                                                                                                                                                                                                                                                                                                                                                                                        | intracellular organelle; intracellular non-membrane-bounded organelle; cytoskeletal part; intracellular organelle part; macromolecular complex; intracellular part; cell; actin cytoskeleton; organelle part; non-membrane-bounded organelle; organelle; cytoskeleton; cell part; intracellular; myosin complex; protein complex; | ATP binding; motor activity; nucleoside phosphate binding; nucleoside binding; ion binding; hydrolase activity, acting on acid anhydrides; hydrolase activity; nucleotide binding; nucleoside-triphosphatase activity; organic cyclic compound binding; heterocyclic compound binding; ribonucleoside binding; carbohydrate derivative binding; pyrophosphatase activity; catalytic activity; ribonucleotide binding; binding; purine ribonucleotide binding; anion binding; purine ribonucleotide binding; adenylyl ribonucleotide binding; adenylyl nucleotide binding; purine nucleoside binding; hydrolase activity, acting on acid anhydrides, in phosphorus-containing anhydrides; purine nucleotide binding; small molecule binding; purine ribonucleoside triphosphate binding; | K10352 | MYH; myosin heavy chain    | dre04530 Tight junction - Danio rerio (zebrafish);                                                                                                                                                                                                                                                | IPR002928; IPR004009; IPR001609; IPR027417; IPR027401; | Myosin tail; Myosin N-terminal; SH3-like; Myosin head; motor domain; P-loop containing nucleoside triphosphate hydrolase; Myosin-like IQ motif-containing domain; |
| B8A561 | myh2.1.2 | Uncharacterized protein                           | _IEDEQSLGAQLQK(cr)K_ | 1108 | 1 | SLGAQLQKKIKELQA | .....K.L....  | nuclear      |                                                                                                                                                                                                                                                                                                                                                                                                                                                                                                                                                                                                                                                                                                                                                                  | intracellular organelle; intracellular non-membrane-bounded organelle; cytoskeletal part; intracellular organelle part; macromolecular complex; intracellular part; cell; actin cytoskeleton; organelle part; non-membrane-bounded organelle; organelle; cytoskeleton; cell part; intracellular; myosin complex; protein complex; | ATP binding; motor activity; nucleoside phosphate binding; nucleoside binding; ion binding; hydrolase activity, acting on acid anhydrides; hydrolase activity; nucleotide binding; nucleoside-triphosphatase activity; organic cyclic compound binding; heterocyclic compound binding; ribonucleoside binding; carbohydrate derivative binding; pyrophosphatase activity; catalytic activity; ribonucleotide binding; binding; purine ribonucleotide binding; anion binding; purine ribonucleotide binding; adenylyl ribonucleotide binding; adenylyl nucleotide binding; purine nucleoside binding; hydrolase activity, acting on acid anhydrides, in phosphorus-containing anhydrides; purine nucleotide binding; small molecule binding; purine ribonucleoside triphosphate binding; | K10352 | MYH; myosin heavy chain    | dre04530 Tight junction - Danio rerio (zebrafish);                                                                                                                                                                                                                                                | IPR002928; IPR004009; IPR001609; IPR027417; IPR027401; | Myosin tail; Myosin N-terminal; SH3-like; Myosin head; motor domain; P-loop containing nucleoside triphosphate hydrolase; Myosin-like IQ motif-containing domain; |
| Q6TH14 |          | Enolase                                           | _IEEELGDK(cr)AK_     | 420  | 1 | IEEELGDKAKFAGKD | .....DK.....  | mitochondria | single-organism carbohydrate catabolic process; glycolytic process; single-organism catabolic process; small molecule metabolic process; single-organism cellular process; single-organism process; carbohydrate metabolic process; primary metabolic process; cellular metabolic process; organic substance metabolic process; carbohydrate catabolic process; single-organism carbohydrate metabolic process; organic substance catabolic process; metabolic process; pyruvate metabolic process; generation of precursor metabolites and energy; single-organism metabolic process; carboxylic acid metabolic process; monocarboxylic acid metabolic process; organic acid metabolic process; cellular process; catabolic process; oxoacid metabolic process; | catalytic complex; cell part; intracellular; cytoplasm; macromolecular complex; intracellular part; cytosolic part; cell; cytosol; protein complex; phosphopyruvate hydratase complex; cytoplasmic part;                                                                                                                          | magnesium ion binding; phosphopyruvate hydratase activity; catalytic activity; binding; ion binding; metal ion binding; cation binding; lyase activity; hydro-lyase activity; carbon-oxygen lyase activity;                                                                                                                                                                                                                                                                                                                                                                                                                                                                                                                                                                             | K01689 | ENO; enolase [EC:4.2.1.11] | dre00010 Glycolysis / Gluconeogenesis - Danio rerio (zebrafish); dre01230 Biosynthesis of amino acids - Danio rerio (zebrafish); dre01200 Carbon metabolism - Danio rerio (zebrafish); dre01100 Metabolic pathways - Danio rerio (zebrafish); dre03018 RNA degradation - Danio rerio (zebrafish); | IPR029065; IPR029017; IPR020810; IPR020811;            | Enolase C-terminal domain-like; Enolase C-terminal; Enolase N-terminal; Enolase domain-like; Enolase N-terminal;                                                  |
| Q6PC12 | eno1a    | Enolase 1, (Alpha)                                | _IEEELGDK(cr)AR_     | 420  | 1 | IEEELGDKAKFAGKN | .....DK.....  | cytosol      | single-organism carbohydrate catabolic process; glycolytic process; single-organism catabolic process; small molecule metabolic process; single-organism cellular process; single-organism process; carbohydrate metabolic process; primary metabolic process; cellular metabolic process; organic substance metabolic process; carbohydrate catabolic process; single-organism carbohydrate metabolic process; organic substance catabolic process; metabolic process; pyruvate metabolic process; generation of precursor metabolites and energy; single-organism metabolic process; carboxylic acid metabolic process; monocarboxylic acid metabolic process; organic acid metabolic process; cellular process; catabolic process; oxoacid metabolic process; | catalytic complex; cell part; intracellular; cytoplasm; macromolecular complex; intracellular part; cytosolic part; cell; cytosol; protein complex; phosphopyruvate hydratase complex; cytoplasmic part;                                                                                                                          | magnesium ion binding; phosphopyruvate hydratase activity; catalytic activity; binding; ion binding; metal ion binding; cation binding; lyase activity; hydro-lyase activity; carbon-oxygen lyase activity;                                                                                                                                                                                                                                                                                                                                                                                                                                                                                                                                                                             | K01689 | ENO; enolase [EC:4.2.1.11] | dre00010 Glycolysis / Gluconeogenesis - Danio rerio (zebrafish); dre01230 Biosynthesis of amino acids - Danio rerio (zebrafish); dre01200 Carbon metabolism - Danio rerio (zebrafish); dre01100 Metabolic pathways - Danio rerio (zebrafish); dre03018 RNA degradation - Danio rerio (zebrafish); | IPR029065; IPR029017; IPR020810; IPR020811;            | Enolase C-terminal domain-like; Enolase C-terminal; Enolase N-terminal; Enolase domain-like; Enolase N-terminal;                                                  |
| Q804W0 | pvalb1   | Parvalbumin 1                                     | _JGAEEFAALVK(cr)A_   | 108  | 1 | EEFAALVKA_____  |               | cytosol      |                                                                                                                                                                                                                                                                                                                                                                                                                                                                                                                                                                                                                                                                                                                                                                  |                                                                                                                                                                                                                                                                                                                                   | cation binding; metal ion binding; calcium ion binding; binding; ion binding;                                                                                                                                                                                                                                                                                                                                                                                                                                                                                                                                                                                                                                                                                                           |        |                            | IPR011992; IPR002048;                                                                                                                                                                                                                                                                             | EF-hand domain pair; EF-hand domain;                   |                                                                                                                                                                   |
| Q98V0  | pvalb2   | Parvalbumin-2                                     | _JGVDEFALLVK(cr)A_   | 108  | 1 | DEFALLVKA_____  |               | cytosol      |                                                                                                                                                                                                                                                                                                                                                                                                                                                                                                                                                                                                                                                                                                                                                                  |                                                                                                                                                                                                                                                                                                                                   | cation binding; metal ion binding; calcium ion binding; binding; ion binding;                                                                                                                                                                                                                                                                                                                                                                                                                                                                                                                                                                                                                                                                                                           |        |                            | IPR002048; IPR011992;                                                                                                                                                                                                                                                                             | EF-hand domain; EF-hand domain pair;                   |                                                                                                                                                                   |

|        |         |                                                      |                     |      |   |                               |                 |                                                                                                                                                                                                                                                                                                                                                                                                                                                                                                                                                                                                                                                                                                                                                                                                                                                                                                                                                                                                                                                                                                                                                                                                                                                                   |                                                                                                                                                                                                                                                                                                                                                                                                                                                                                                                                                                                |                                                                                                                                                                                                                                                                                                                                                                                                                                                                                                                                                                                                                                                                                                                                                                 |                                                       |                                                                                                                                                                                                                                                                                                                                                             |                                                                   |                                                                                                                                                                                 |                                                                                                                                                                    |
|--------|---------|------------------------------------------------------|---------------------|------|---|-------------------------------|-----------------|-------------------------------------------------------------------------------------------------------------------------------------------------------------------------------------------------------------------------------------------------------------------------------------------------------------------------------------------------------------------------------------------------------------------------------------------------------------------------------------------------------------------------------------------------------------------------------------------------------------------------------------------------------------------------------------------------------------------------------------------------------------------------------------------------------------------------------------------------------------------------------------------------------------------------------------------------------------------------------------------------------------------------------------------------------------------------------------------------------------------------------------------------------------------------------------------------------------------------------------------------------------------|--------------------------------------------------------------------------------------------------------------------------------------------------------------------------------------------------------------------------------------------------------------------------------------------------------------------------------------------------------------------------------------------------------------------------------------------------------------------------------------------------------------------------------------------------------------------------------|-----------------------------------------------------------------------------------------------------------------------------------------------------------------------------------------------------------------------------------------------------------------------------------------------------------------------------------------------------------------------------------------------------------------------------------------------------------------------------------------------------------------------------------------------------------------------------------------------------------------------------------------------------------------------------------------------------------------------------------------------------------------|-------------------------------------------------------|-------------------------------------------------------------------------------------------------------------------------------------------------------------------------------------------------------------------------------------------------------------------------------------------------------------------------------------------------------------|-------------------------------------------------------------------|---------------------------------------------------------------------------------------------------------------------------------------------------------------------------------|--------------------------------------------------------------------------------------------------------------------------------------------------------------------|
| Q90ZM2 | sec61a1 | Protein transport protein Sec61 subunit alpha-like 1 | _IEVGDTPK(cr)DR_    | 107  | 1 | IEVGDTPKDRALFNG               | plasma membrane | developmental process; nervous system development; single-multicellular organism process; brain development; system development; single-organism process; organic substance transport; multicellular organismal process; protein transport; establishment of localization; establishment of protein localization; transport; organ development; habenula development; single-organism developmental process; diencephalon development; central nervous system development; head development; forebrain development; multicellular organismal development; protein localization; macromolecule localization; localization; anatomical structure development; epihalamus development;                                                                                                                                                                                                                                                                                                                                                                                                                                                                                                                                                                               | membrane; intracellular organelle; endoplasmic reticulum; nuclear outer membrane-endoplasmic reticulum membrane network; bounding membrane of organelle; organelle membrane; cytoplasm; intracellular organelle part; intrinsic component of membrane; endomembrane system; intracellular part; cell; integral component of membrane; organelle part; intracellular membrane-bounded organelle; organelle; endoplasmic reticulum part; intracellular; cell part; membrane part; membrane region; membrane-bounded organelle; endoplasmic reticulum membrane; cytoplasmic part; | K10956                                                                                                                                                                                                                                                                                                                                                                                                                                                                                                                                                                                                                                                                                                                                                          | SEC61A; protein transport protein SEC61 subunit alpha | dre03060 Protein export - Danio rerio (zebrafish); dre04145 Phagosome - Danio rerio (zebrafish); dre04141 Protein processing in endoplasmic reticulum - Danio rerio (zebrafish);                                                                                                                                                                            | IPR023201; IPR019561;                                             | SecY subunit domain; Translocon SecY1SecY plug domain;                                                                                                                          |                                                                                                                                                                    |
| F1RBK3 | -       | Pyruvate kinase                                      | _ISK(cr)LENHEGVR_   | 269  | 1 | KDIRIISKLENHEGV .....K.E..... | cytosol         | single-organism carbohydrate catabolic process; glycolytic process; single-organism catabolic process; small molecule metabolic process; single-organism cellular process; single-organism process; carbohydrate metabolic process; primary metabolic process; cellular metabolic process; organic substance metabolic process; carbohydrate catabolic process; single-organism carbohydrate metabolic process; organic substance catabolic process; metabolic process; pyruvate metabolic process; generation of precursor metabolites and energy; single-organism metabolic process; carboxylic acid metabolic process; monocarboxylic acid metabolic process; organic acid metabolic process; cellular process; catabolic process; oxoacid metabolic process;                                                                                                                                                                                                                                                                                                                                                                                                                                                                                                  | magnesium ion binding; pyruvate kinase activity; kinase activity; phosphotransferase activity, alcohol group as acceptor; catalytic activity; binding; ion binding; potassium ion binding; metal ion binding; cation binding; alkali metal ion binding; transferase activity; transferase activity, transferring phosphorus-containing groups;                                                                                                                                                                                                                                 | K00873                                                                                                                                                                                                                                                                                                                                                                                                                                                                                                                                                                                                                                                                                                                                                          | PK pyruvate kinase [EC:2.7.1.40]                      | dre00010 Glycolysis / Gluconeogenesis - Danio rerio (zebrafish); dre01230 Biosynthesis of amino acids - Danio rerio (zebrafish); dre01200 Carbon metabolism - Danio rerio (zebrafish); dre01100 Metabolic pathways - Danio rerio (zebrafish); dre00620 Pyruvate metabolism - Danio rerio (zebrafish); dre00230 Purine metabolism - Danio rerio (zebrafish); | IPR015794; IPR011037; IPR015813; IPR015806; IPR015795; IPR015793; | Pyruvate kinase, alpha/beta; Pyruvate kinase-like, insert domain; Pyruvate/Phosphoenopyruvate kinase, beta-barrel domain; Pyruvate kinase, C-terminal; Pyruvate kinase, barrel; |                                                                                                                                                                    |
| B3DFN3 | lmb2    | Lamin B2                                             | _IK(cr)DLEAQYNK_    | 130  | 1 | AAALVRKDLAQYN .....K.L.....   | nuclear         | intracellular organelle; intracellular non-membrane-bounded organelle; cytoskeletal part; intracellular organelle part; macromolecular complex; intracellular part; cell; organelle part; non-membrane-bounded organelle; organelle; cytoskeleton; intermediate filament cytoskeleton; cell part; intracellular; intermediate filament; protein complex;                                                                                                                                                                                                                                                                                                                                                                                                                                                                                                                                                                                                                                                                                                                                                                                                                                                                                                          | structural molecule activity;                                                                                                                                                                                                                                                                                                                                                                                                                                                                                                                                                  | K07611                                                                                                                                                                                                                                                                                                                                                                                                                                                                                                                                                                                                                                                                                                                                                          | -                                                     | IPR001322;                                                                                                                                                                                                                                                                                                                                                  | Lamin Tail Domain;                                                |                                                                                                                                                                                 |                                                                                                                                                                    |
| F1QIR4 | -       | Uncharacterized protein                              | _IK(cr)ELTYQTEEDRK_ | 1851 | 1 | RKYERRIKELTYQTE .....K.L..... | cytosol         | cellular component biogenesis; muscle cell development; single-multicellular organism process; cellular component organization; muscle system process; cellular developmental process; cellular component morphogenesis; single-organism process; actin filament organization; cell development; anatomical structure morphogenesis; cell differentiation; actin cytoskeleton organization; muscle contraction; cellular component assembly; organelle assembly; macromolecular complex assembly; myofibril assembly; musculoskeletal movement; slow-twitch skeletal muscle fiber contraction; muscle structure development; cytoskeleton organization; anatomical structure formation involved in morphogenesis; cellular process; striated muscle myosin thick filament assembly; protein complex assembly; cellular protein complex assembly; skeletal muscle thin filament assembly; developmental process; cellular macromolecular complex assembly; striated muscle cell differentiation; actomyosin structure organization; system process; protein complex subunit organization; multicellular organismal movement; single-organism cellular process; cellular component assembly involved in morphogenesis; striated muscle contraction; myosin filament | intracellular organelle; intracellular non-membrane-bounded organelle; cytoskeletal part; intracellular organelle part; macromolecular complex; intracellular part; cell; actin cytoskeleton; organelle part; non-membrane-bounded organelle; organelle; cytoskeleton; cell part; intracellular; myosin complex; protein complex;                                                                                                                                                                                                                                              | ATP binding; motor activity; nucleoside phosphate binding; nucleoside binding; ion binding; hydrolase activity, acting on acid anhydrides; hydrolase activity; nucleotide binding; nucleoside-triphosphatase activity; organic cyclic compound binding; heterocyclic compound binding; carbohydrate derivative binding; pyrophosphatase activity; catalytic activity; ribonucleotide binding; binding; purine ribonucleoside binding; anion binding; purine ribonucleotide binding; adenylyl ribonucleotide binding; adenylyl nucleotide binding; purine nucleoside binding; hydrolase activity, acting on acid anhydrides, in phosphorus-containing anhydrides; purine nucleotide binding; small molecule binding; purine ribonucleoside triphosphate binding; | K10352                                                | MYH; myosin heavy chain                                                                                                                                                                                                                                                                                                                                     | dre04530 Tight junction - Danio rerio (zebrafish);                | IPR002928; IPR004009; IPR027417; IPR001609; IPR027401;                                                                                                                          | Myosin tail; Myosin, N-terminal, SH3-like; P-loop containing nucleoside triphosphate hydrolase; Myosin head, motor domain; Myosin-like IQ motif-containing domain; |
| Q9IBV1 | act1b   | Actin, alpha 1, skeletal muscle                      | _IK(cr)IAPPER_      | 330  | 1 | APSTMKIIAPPER .....K.L.....   | cytoskeleton    | cytoskeleton; organelle; intracellular organelle; intracellular non-membrane-bounded organelle; cell part; intracellular; cytoplasm; intracellular part; cell; non-membrane-bounded organelle;                                                                                                                                                                                                                                                                                                                                                                                                                                                                                                                                                                                                                                                                                                                                                                                                                                                                                                                                                                                                                                                                    | ATP binding; nucleoside phosphate binding; nucleoside binding; ion binding; nucleotide binding; organic cyclic compound binding; heterocyclic compound binding; ribonucleoside binding; carbohydrate derivative binding; ribonucleotide binding; binding; purine ribonucleoside binding; anion binding; purine ribonucleoside binding; adenylyl ribonucleotide binding; adenylyl nucleotide binding; purine nucleoside binding; purine nucleotide binding; small molecule binding; purine ribonucleoside triphosphate binding;                                                 | K10354                                                                                                                                                                                                                                                                                                                                                                                                                                                                                                                                                                                                                                                                                                                                                          | -                                                     | -                                                                                                                                                                                                                                                                                                                                                           | -                                                                 |                                                                                                                                                                                 |                                                                                                                                                                    |

|        |                   |                                            |                          |      |   |                 |               |                       |                                                                                                                                                                                                                                                                                                                                                                                                                                                                                                                                                                                                                                                                                                                                                                                                                                                                                                                |                                                                                                                                                                                                                                                                            |                                                                                                                                                                               |                                                                                                                                                                                                                                                                                                                                                                                                                                                        |                                                                                                                                                                                                                                                                                                                                |                                                                                                             |
|--------|-------------------|--------------------------------------------|--------------------------|------|---|-----------------|---------------|-----------------------|----------------------------------------------------------------------------------------------------------------------------------------------------------------------------------------------------------------------------------------------------------------------------------------------------------------------------------------------------------------------------------------------------------------------------------------------------------------------------------------------------------------------------------------------------------------------------------------------------------------------------------------------------------------------------------------------------------------------------------------------------------------------------------------------------------------------------------------------------------------------------------------------------------------|----------------------------------------------------------------------------------------------------------------------------------------------------------------------------------------------------------------------------------------------------------------------------|-------------------------------------------------------------------------------------------------------------------------------------------------------------------------------|--------------------------------------------------------------------------------------------------------------------------------------------------------------------------------------------------------------------------------------------------------------------------------------------------------------------------------------------------------------------------------------------------------------------------------------------------------|--------------------------------------------------------------------------------------------------------------------------------------------------------------------------------------------------------------------------------------------------------------------------------------------------------------------------------|-------------------------------------------------------------------------------------------------------------|
| Q6P3J5 | eef2b             | Eukaryotic translation elongation factor 2 | _IK(cr)PVLMMNK_          | 152  | 1 | QAIAERIKPVLMMNK | .....K.V..... | cytosol               | nucleoside phosphate binding; translation elongation factor activity; hydrolase activity, acting on acid anhydrides; hydrolase activity; organic cyclic compound binding; heterocyclic compound binding; pyrophosphatase activity; catalytic activity; ribonucleotide binding; binding; GTP binding; purine ribonucleoside binding; anion binding; hydrolase activity, acting on acid anhydrides, in phosphorus-containing anhydrides; guanyl nucleotide binding; GTP binding; purine nucleotide binding; purine ribonucleoside triphosphate binding; RNA binding; ion binding; nucleoside binding; nucleotide binding; nucleoside-triphosphatase activity; ribonucleoside binding; translation factor activity, nucleic acid binding; carbohydrate derivative binding; nucleic acid binding; purine ribonucleoside binding; guanyl ribonucleoside binding; purine nucleoside binding; small molecule binding; | K03234                                                                                                                                                                                                                                                                     | IPR027417; IPR000795; IPR005517; IPR005225; IPR004161; IPR000640; IPR020568; IPR014721; IPR009022; IPR009000;                                                                 | P-loop containing nucleoside triphosphate hydrolase; Elongation factor, GTP-binding domain; Translation elongation factor EFG/EF2, domain IV; Small GTP-binding protein domain; Translation elongation factor EFTu/EF1A, domain 2; Translation elongation factor EFG, V domain; Ribosomal protein S5 domain 2-type fold; Ribosomal protein S5 domain 2-type fold, subgroup; Elongation factor G, II-V domain; Translation protein, beta-barrel domain; |                                                                                                                                                                                                                                                                                                                                |                                                                                                             |
| E9QDR0 | tps2              | Uncharacterized protein                    | _IK(cr)SLEEIYLSLPIK_     | 62   | 1 | LVKDMKIKSLEIYL  | .....K.L..... | nuclear               | cellular protein metabolic process; biosynthetic process; primary metabolic process; cellular metabolic process; organic substance biosynthetic process; cellular biosynthetic process; organic substance metabolic process; metabolic process; cellular macromolecule biosynthetic process; cellular macromolecule metabolic process; gene expression; macromolecule metabolic process; protein metabolic process; macromolecule biosynthetic process; translation; cellular process;                                                                                                                                                                                                                                                                                                                                                                                                                         | ribosome; organelle; intracellular organelle; organelle; cell part; intracellular; cytoplasm; macromolecular complex; intracellular part; cell; ribonucleoprotein complex; cytoplasmic part; non-membrane-bounded organelle;                                               | organic cyclic compound binding; heterocyclic compound binding; RNA binding; binding; nucleic acid binding; structural molecule activity; structural constituent of ribosome; | IPR014720; IPR013810;                                                                                                                                                                                                                                                                                                                                                                                                                                  | Double-stranded RNA-binding domain; Ribosomal protein S5, N-terminal;                                                                                                                                                                                                                                                          |                                                                                                             |
| A3KPf6 | si:ch211-288g17.3 | Uncharacterized protein                    | _IK(cr)VVVVK_            | 247  | 1 | PGTGRKIKVVVVKV  | .....K.V..... | nuclear               | organic cyclic compound binding; heterocyclic compound binding; DNA binding; binding; nucleic acid binding;                                                                                                                                                                                                                                                                                                                                                                                                                                                                                                                                                                                                                                                                                                                                                                                                    |                                                                                                                                                                                                                                                                            |                                                                                                                                                                               |                                                                                                                                                                                                                                                                                                                                                                                                                                                        |                                                                                                                                                                                                                                                                                                                                |                                                                                                             |
| B8JKH7 | myt3              | Uncharacterized protein                    | _ILGDPSADDM(cx)ANK(cr)R_ | 88   | 1 | SADDMANKRIDFEAF | .....K.L..... | mitochondria          | cation binding; metal ion binding; calcium ion binding; binding; ion binding;                                                                                                                                                                                                                                                                                                                                                                                                                                                                                                                                                                                                                                                                                                                                                                                                                                  |                                                                                                                                                                                                                                                                            | IPR002048; IPR011992;                                                                                                                                                         | EF-hand domain; EF-hand domain pair;                                                                                                                                                                                                                                                                                                                                                                                                                   |                                                                                                                                                                                                                                                                                                                                |                                                                                                             |
| Q6P0G6 | myt1              | Uncharacterized protein                    | _ILGNPTADDMVVK(cr)R_     | 102  | 1 | TADDMVVKRVDFEGF | .....K.V..... | cytosol               | cation binding; metal ion binding; calcium ion binding; binding; ion binding;                                                                                                                                                                                                                                                                                                                                                                                                                                                                                                                                                                                                                                                                                                                                                                                                                                  |                                                                                                                                                                                                                                                                            | IPR002048; IPR011992;                                                                                                                                                         | EF-hand domain; EF-hand domain pair;                                                                                                                                                                                                                                                                                                                                                                                                                   |                                                                                                                                                                                                                                                                                                                                |                                                                                                             |
| Q6P5L3 | rp19              | 60S ribosomal protein L19                  | _ILMEHIHK(cr)LK_         | 144  | 1 | ILMEHIHKLAKDKAR |               | cytosol               | cellular protein metabolic process; biosynthetic process; primary metabolic process; cellular metabolic process; organic substance biosynthetic process; cellular biosynthetic process; organic substance metabolic process; metabolic process; cellular macromolecule biosynthetic process; cellular macromolecule metabolic process; gene expression; macromolecule metabolic process; protein metabolic process; macromolecule biosynthetic process; translation; cellular process;                                                                                                                                                                                                                                                                                                                                                                                                                         | ribosome; organelle; intracellular organelle; intracellular non-membrane-bounded organelle; organelle; cell part; intracellular; cytoplasm; macromolecular complex; intracellular part; cell; ribonucleoprotein complex; cytoplasmic part; non-membrane-bounded organelle; | structural constituent of ribosome; structural molecule activity;                                                                                                             | K02885                                                                                                                                                                                                                                                                                                                                                                                                                                                 | RP-L19e; large subunit ribosomal protein L19e<br>dre03010 Ribosome - Danio rerio (zebrafish);                                                                                                                                                                                                                                  | Ribosomal protein L19L19e domain; Ribosomal protein L19L19e, domain 1; Ribosomal protein L19L19e, domain 1; |
| F1QH4C | lnnb1             | Uncharacterized protein                    | _INELEGALSHEK(cr)DLRSR_  | 333  | 1 | EGALSHEKDLRSRL  | .....K.L..... | nuclear               | intracellular organelle; intracellular non-membrane-bounded organelle; cytoskeletal part; intracellular organelle part; macromolecular complex; intracellular part; cell; organelle part; non-membrane-bounded organelle; organelle; cytoskeleton; intermediate filament cytoskeleton; cell part; intracellular; intermediate filament; protein complex;                                                                                                                                                                                                                                                                                                                                                                                                                                                                                                                                                       | structural molecule activity;                                                                                                                                                                                                                                              |                                                                                                                                                                               | IPR001322;                                                                                                                                                                                                                                                                                                                                                                                                                                             | Lamin Tail Domain;                                                                                                                                                                                                                                                                                                             |                                                                                                             |
| Q5T2Z9 | apobb.1           | Uncharacterized protein                    | _IPALPEFTFPK(cr)K_       | 1208 | 1 | LPEFTFPKILFLNAE | .....K.L..... | endoplasmic reticulum | response to chemical; response to stimulus;                                                                                                                                                                                                                                                                                                                                                                                                                                                                                                                                                                                                                                                                                                                                                                                                                                                                    | lipid transporter activity; substrate-specific transporter activity; transporter activity;                                                                                                                                                                                 |                                                                                                                                                                               |                                                                                                                                                                                                                                                                                                                                                                                                                                                        | Vitellogenin, superhelical; Vitellogenin, open beta-sheet, subdomain 1; Vitellogenin, open beta-sheet, subdomain 2; Lipid transport protein, N-terminal; Lipid transport protein, beta-sheet shell; Vitellogenin, beta-sheet N-terminal; Armadillo-type fold; Vitellogenin, open beta-sheet; Lipid transport, open beta-sheet; |                                                                                                             |
| E7EXP0 | tnnt3b            | Uncharacterized protein                    | IPDGDK(cr)VDFDDIQK       | 32   | 1 | PKIPDGDKVFDDIQ  | .....DK.....  | nuclear               |                                                                                                                                                                                                                                                                                                                                                                                                                                                                                                                                                                                                                                                                                                                                                                                                                                                                                                                |                                                                                                                                                                                                                                                                            | K12046                                                                                                                                                                        |                                                                                                                                                                                                                                                                                                                                                                                                                                                        |                                                                                                                                                                                                                                                                                                                                |                                                                                                             |
| E7EXP0 | tnnt3b            | Uncharacterized protein                    | IPDGDKVFDDIQK(cr)K       | 40   | 1 | VDFDDIQKVKRDKL  |               | nuclear               |                                                                                                                                                                                                                                                                                                                                                                                                                                                                                                                                                                                                                                                                                                                                                                                                                                                                                                                |                                                                                                                                                                                                                                                                            | K12046                                                                                                                                                                        |                                                                                                                                                                                                                                                                                                                                                                                                                                                        |                                                                                                                                                                                                                                                                                                                                |                                                                                                             |
| F1R1J9 | ahnak             | Uncharacterized protein                    | _IPK(cr)TDIDIK_          | 1275 | 1 | KVKGSKFKIPFSGPT |               | nuclear               |                                                                                                                                                                                                                                                                                                                                                                                                                                                                                                                                                                                                                                                                                                                                                                                                                                                                                                                | catalytic activity; oxidoreductase activity;                                                                                                                                                                                                                               |                                                                                                                                                                               | IPR001478; IPR011254;                                                                                                                                                                                                                                                                                                                                                                                                                                  | PD2 domain; Prismane-like;                                                                                                                                                                                                                                                                                                     |                                                                                                             |

|        |        |                                    |                          |      |   |                 |                 |                                                                                                                                                                                                                                                                                                                                                                                                                                                                                                                                                                                                                                                                                                                                                                  |                                                                                                                                                                                                                                                                                                                                   |                                                                                                                                                                                                                        |                                                                                                                                                                                                                                                                                                                                                                                                                                                                                                                                                                                                                                                                                                                                                                                         |                                               |                                                                                                                                                                                                                                       |                                                                                                                                                                                                                                                                                             |                                                                           |                                                                                                                                                                    |
|--------|--------|------------------------------------|--------------------------|------|---|-----------------|-----------------|------------------------------------------------------------------------------------------------------------------------------------------------------------------------------------------------------------------------------------------------------------------------------------------------------------------------------------------------------------------------------------------------------------------------------------------------------------------------------------------------------------------------------------------------------------------------------------------------------------------------------------------------------------------------------------------------------------------------------------------------------------------|-----------------------------------------------------------------------------------------------------------------------------------------------------------------------------------------------------------------------------------------------------------------------------------------------------------------------------------|------------------------------------------------------------------------------------------------------------------------------------------------------------------------------------------------------------------------|-----------------------------------------------------------------------------------------------------------------------------------------------------------------------------------------------------------------------------------------------------------------------------------------------------------------------------------------------------------------------------------------------------------------------------------------------------------------------------------------------------------------------------------------------------------------------------------------------------------------------------------------------------------------------------------------------------------------------------------------------------------------------------------------|-----------------------------------------------|---------------------------------------------------------------------------------------------------------------------------------------------------------------------------------------------------------------------------------------|---------------------------------------------------------------------------------------------------------------------------------------------------------------------------------------------------------------------------------------------------------------------------------------------|---------------------------------------------------------------------------|--------------------------------------------------------------------------------------------------------------------------------------------------------------------|
| E9QF69 | rp18   | 60S ribosomal protein L18          | _IQNIPK(cr)LK_           | 97   | 1 | VRIQNIPKLVKCALK | mitochondria    | cellular protein metabolic process; biosynthetic process; primary metabolic process; cellular metabolic process; organic substance biosynthetic process; cellular biosynthetic process; organic substance metabolic process; metabolic process; cellular macromolecule biosynthetic process; cellular macromolecule metabolic process; gene expression; macromolecule metabolic process; protein metabolic process; macromolecule biosynthetic process; translation; cellular process;                                                                                                                                                                                                                                                                           | ribosome; organelle; intracellular organelle; intracellular non-membrane-bounded organelle; cell part; intracellular; cytoplasm; macromolecular complex; intracellular part; cell; ribonucleoprotein complex; cytoplasmic part; non-membrane-bounded organelle;                                                                   | structural constituent of ribosome; structural molecule activity;                                                                                                                                                      |                                                                                                                                                                                                                                                                                                                                                                                                                                                                                                                                                                                                                                                                                                                                                                                         | IPR021131;                                    | Ribosomal protein L18a/L15P;                                                                                                                                                                                                          |                                                                                                                                                                                                                                                                                             |                                                                           |                                                                                                                                                                    |
| Q6PF77 | cot1   | Coactosin-like 1                   | _ISTDK(cr)ALVK_          | 98   | 1 | RAKISTDKALVKDAV | cytosol,nucleus |                                                                                                                                                                                                                                                                                                                                                                                                                                                                                                                                                                                                                                                                                                                                                                  | cell; intracellular; cell part;                                                                                                                                                                                                                                                                                                   |                                                                                                                                                                                                                        |                                                                                                                                                                                                                                                                                                                                                                                                                                                                                                                                                                                                                                                                                                                                                                                         | IPR002108; IPR029006;                         | Actin-depolymerising factor homology domain; ADP-HiGelsolin-like domain;                                                                                                                                                              |                                                                                                                                                                                                                                                                                             |                                                                           |                                                                                                                                                                    |
| F1QXV8 | pgk1   | Phosphoglycerate kinase            | _ITLPVDFITADK(cr)FDEK_   | 291  | 1 | VDFTADKFDKATT   | cytosol         | single-organism carbohydrate catabolic process; glycolytic process; single-organism catabolic process; small molecule metabolic process; single-organism cellular process; single-organism process; carbohydrate metabolic process; primary metabolic process; cellular metabolic process; organic substance metabolic process; carbohydrate catabolic process; single-organism carbohydrate metabolic process; organic substance catabolic process; metabolic process; pyruvate metabolic process; generation of precursor metabolites and energy; single-organism metabolic process; carboxylic acid metabolic process; monocarboxylic acid metabolic process; organic acid metabolic process; cellular process; catabolic process; oxoacid metabolic process; |                                                                                                                                                                                                                                                                                                                                   | phosphotransferase activity, carboxyl group as acceptor; kinase activity; catalytic activity; transferase activity; phosphoglycerate kinase activity; transferase activity, transferring phosphorus-containing groups; | K00927                                                                                                                                                                                                                                                                                                                                                                                                                                                                                                                                                                                                                                                                                                                                                                                  | PGK; phosphoglycerate kinase [EC:2.7.2.3]     | dre00110 Glycolysis / Gluconeogenesis - Dario rio (zebrafish); dre01230 Biosynthesis of amino acids - Dario rio (zebrafish); dre01200 Carbon metabolism - Dario rio (zebrafish); dre01100 Metabolic pathways - Dario rio (zebrafish); | IPR015824; IPR015901;                                                                                                                                                                                                                                                                       | Phosphoglycerate kinase, N-terminal; Phosphoglycerate kinase, C-terminal; |                                                                                                                                                                    |
| F1R2S5 | vlg5   | Uncharacterized protein (Fragment) | _IVTYAK(cr)K_            | 1277 | 1 | KIVTYAKVKCKHL   | plasma membrane |                                                                                                                                                                                                                                                                                                                                                                                                                                                                                                                                                                                                                                                                                                                                                                  |                                                                                                                                                                                                                                                                                                                                   | lipid transporter activity; substrate-specific transporter activity; transporter activity;                                                                                                                             |                                                                                                                                                                                                                                                                                                                                                                                                                                                                                                                                                                                                                                                                                                                                                                                         |                                               | IPR015816; IPR015258; IPR011030; IPR015819; IPR015817; IPR015818; IPR001747; IPR015255;                                                                                                                                               | Vitellogen, beta-sheet N-terminal; Vitellogen, beta-sheet shell; Vitellogen, superhelical; Lipid transport protein, beta-sheet shell; Vitellogen, open beta-sheet, subdomain 1; Vitellogen, open beta-sheet, subdomain 2; Lipid transport protein, N-terminal; Vitellogen, open beta-sheet; |                                                                           |                                                                                                                                                                    |
| Q7ZWJ7 | rp134  | 60S ribosomal protein L34          | _IVVK(cr)VLK_            | 105  | 1 | EEQIVKVKLKAQAQ  | nuclear         | cellular protein metabolic process; biosynthetic process; primary metabolic process; cellular metabolic process; organic substance biosynthetic process; cellular biosynthetic process; organic substance metabolic process; metabolic process; cellular macromolecule biosynthetic process; cellular macromolecule metabolic process; gene expression; macromolecule metabolic process; protein metabolic process; macromolecule biosynthetic process; translation; cellular process;                                                                                                                                                                                                                                                                           | ribosome; organelle; intracellular organelle; intracellular non-membrane-bounded organelle; cell part; intracellular; cytoplasm; macromolecular complex; intracellular part; cell; ribonucleoprotein complex; cytoplasmic part; non-membrane-bounded organelle;                                                                   | structural constituent of ribosome; structural molecule activity;                                                                                                                                                      | K02915                                                                                                                                                                                                                                                                                                                                                                                                                                                                                                                                                                                                                                                                                                                                                                                  | RP-L34e; large subunit ribosomal protein L34e | dre03010 Ribosome - Dario rio (zebrafish);                                                                                                                                                                                            |                                                                                                                                                                                                                                                                                             |                                                                           |                                                                                                                                                                    |
| Q804W0 | pvalb1 | Parvalbumin 1                      | _K(cr)AFAIIDDNSGFIEEELK_ | 46   | 1 | KSADDEVKFAIDQ   | cytosol         |                                                                                                                                                                                                                                                                                                                                                                                                                                                                                                                                                                                                                                                                                                                                                                  |                                                                                                                                                                                                                                                                                                                                   | cation binding; metal ion binding; calcium ion binding; binding; ion binding;                                                                                                                                          |                                                                                                                                                                                                                                                                                                                                                                                                                                                                                                                                                                                                                                                                                                                                                                                         |                                               | IPR011992; IPR002048;                                                                                                                                                                                                                 | EF-hand domain pair; EF-hand domain;                                                                                                                                                                                                                                                        |                                                                           |                                                                                                                                                                    |
| Q98V0  | pvalb2 | Parvalbumin-2                      | _K(cr)AFFVIDQDK_         | 46   | 1 | KSPDDIKKAFVIDQ  | cytosol         |                                                                                                                                                                                                                                                                                                                                                                                                                                                                                                                                                                                                                                                                                                                                                                  |                                                                                                                                                                                                                                                                                                                                   | cation binding; metal ion binding; calcium ion binding; binding; ion binding;                                                                                                                                          |                                                                                                                                                                                                                                                                                                                                                                                                                                                                                                                                                                                                                                                                                                                                                                                         |                                               | IPR002048; IPR011992;                                                                                                                                                                                                                 | EF-hand domain; EF-hand domain pair;                                                                                                                                                                                                                                                        |                                                                           |                                                                                                                                                                    |
| B8A568 | myh2.1 | Uncharacterized protein            | _K(cr)ATDAAMMAEELK_      | 1759 | 1 | NAEDKAKKATDAAM  | nuclear         |                                                                                                                                                                                                                                                                                                                                                                                                                                                                                                                                                                                                                                                                                                                                                                  | intracellular organelle; intracellular non-membrane-bounded organelle; cytoskeleton part; intracellular organelle part; macromolecular complex; intracellular part; cell; actin cytoskeleton; organelle part; non-membrane-bounded organelle; organelle; cytoskeleton; cell part; intracellular; myosin complex; protein complex; |                                                                                                                                                                                                                        | ATP binding; motor activity; nucleoside phosphate binding; nucleoside binding; ion binding; hydrolase activity, acting on acid anhydrides; hydrolase activity; nucleotide binding; nucleoside-triphosphatase activity; organic cyclic compound binding; heterocyclic compound binding; ribonucleoside binding; carbohydrate derivative binding; pyrophosphatase activity; catalytic activity; ribonucleotide binding; binding; purine ribonucleoside binding; anion binding; purine ribonucleotide binding; adenylyl ribonucleotide binding; adenylyl nucleotide binding; purine nucleoside binding; hydrolase activity, acting on acid anhydrides, in phosphorus-containing anhydrides; purine nucleotide binding; small molecule binding; purine ribonucleoside triphosphate binding; | K10352                                        | MYH; myosin heavy chain                                                                                                                                                                                                               | dre04530 Tight junction - Dario rio (zebrafish);                                                                                                                                                                                                                                            | IPR002928; IPR004009; IPR001609; IPR027417; IPR027401;                    | Myosin tail; Myosin, N-terminal, SH3-like; Myosin head, motor domain; P-loop containing nucleoside triphosphate hydrolase; Myosin-like IQ motif-containing domain; |
| B8A561 | myh2.2 | Uncharacterized protein            | _K(cr)ATDAAMMAEELK_      | 1759 | 1 | NAEDKAKKATDAAM  | nuclear         |                                                                                                                                                                                                                                                                                                                                                                                                                                                                                                                                                                                                                                                                                                                                                                  | intracellular organelle; intracellular non-membrane-bounded organelle; cytoskeleton part; intracellular organelle part; macromolecular complex; intracellular part; cell; actin cytoskeleton; organelle part; non-membrane-bounded organelle; organelle; cytoskeleton; cell part; intracellular; myosin complex; protein complex; |                                                                                                                                                                                                                        | ATP binding; motor activity; nucleoside phosphate binding; nucleoside binding; ion binding; hydrolase activity, acting on acid anhydrides; hydrolase activity; nucleotide binding; nucleoside-triphosphatase activity; organic cyclic compound binding; heterocyclic compound binding; ribonucleoside binding; carbohydrate derivative binding; pyrophosphatase activity; catalytic activity; ribonucleotide binding; binding; purine ribonucleoside binding; anion binding; purine ribonucleotide binding; adenylyl ribonucleotide binding; adenylyl nucleotide binding; purine nucleoside binding; hydrolase activity, acting on acid anhydrides, in phosphorus-containing anhydrides; purine nucleotide binding; small molecule binding; purine ribonucleoside triphosphate binding; | K10352                                        | MYH; myosin heavy chain                                                                                                                                                                                                               | dre04530 Tight junction - Dario rio (zebrafish);                                                                                                                                                                                                                                            | IPR002928; IPR004009; IPR001609; IPR027417; IPR027401;                    | Myosin tail; Myosin, N-terminal, SH3-like; Myosin head, motor domain; P-loop containing nucleoside triphosphate hydrolase; Myosin-like IQ motif-containing domain; |

|        |          |                         |                          |      |   |                               |               |                                                                                                                                                                                                                                                                                                                                                                                                                                                                                                                                                                                                   |                                                                                                                                                                                                                                                                                                                                                                                                                                                                                                                                                                                                                                                                                                                                                                                         |        |                         |                                                                                                                                                                                                                                  |                          |                                                        |                                                                                                                                                                    |
|--------|----------|-------------------------|--------------------------|------|---|-------------------------------|---------------|---------------------------------------------------------------------------------------------------------------------------------------------------------------------------------------------------------------------------------------------------------------------------------------------------------------------------------------------------------------------------------------------------------------------------------------------------------------------------------------------------------------------------------------------------------------------------------------------------|-----------------------------------------------------------------------------------------------------------------------------------------------------------------------------------------------------------------------------------------------------------------------------------------------------------------------------------------------------------------------------------------------------------------------------------------------------------------------------------------------------------------------------------------------------------------------------------------------------------------------------------------------------------------------------------------------------------------------------------------------------------------------------------------|--------|-------------------------|----------------------------------------------------------------------------------------------------------------------------------------------------------------------------------------------------------------------------------|--------------------------|--------------------------------------------------------|--------------------------------------------------------------------------------------------------------------------------------------------------------------------|
| B8A561 | myh2.1.2 | Uncharacterized protein | _K(cr)AVETEK_            | 1533 | 1 | HELEKSKKAVETEK_A.....K.V..... | nuclear       | intracellular organelle; intracellular non-membrane-bounded organelle; cytoskeleton part; intracellular organelle part; macromolecular complex; intracellular part; cell; actin cytoskeleton; organelle part; non-membrane-bounded organelle; organelle; cytoskeleton; cell part; intracellular; myosin complex; protein complex;                                                                                                                                                                                                                                                                 | ATP binding; motor activity; nucleoside phosphate binding; nucleoside binding; ion binding; hydrolase activity, acting on acid anhydrides; hydrolase activity; nucleotide binding; nucleoside-triphosphatase activity; organic cyclic compound binding; heterocyclic compound binding; ribonucleoside binding; carbohydrate derivative binding; pyrophosphatase activity; catalytic activity; ribonucleotide binding; binding; purine ribonucleotide binding; anion binding; purine ribonucleotide binding; adenylyl ribonucleotide binding; adenylyl nucleotide binding; purine nucleoside binding; hydrolase activity, acting on acid anhydrides, in phosphorus-containing anhydrides; purine nucleotide binding; small molecule binding; purine ribonucleoside triphosphate binding; | K10352 | MYH; myosin heavy chain | dre04530 Tight junction - Danio rerio (zebrafish);                                                                                                                                                                               | Danio rerio (zebrafish); | IPR002928; IPR004009; IPR001609; IPR027417; IPR027401; | Myosin tail; Myosin, N-terminal, SH3-like; Myosin head, motor domain; P-loop containing nucleoside triphosphate hydrolase; Myosin-like IQ motif-containing domain; |
| B8A568 | myh2.1.1 | Uncharacterized protein | _K(cr)DFETSQLLSK_        | 1085 | 1 | SEEKLLKKDFETSQ_L..E...K.....  | nuclear       | intracellular organelle; intracellular non-membrane-bounded organelle; cytoskeleton part; intracellular organelle part; macromolecular complex; intracellular part; cell; actin cytoskeleton; organelle part; non-membrane-bounded organelle; organelle; cytoskeleton; cell part; intracellular; myosin complex; protein complex;                                                                                                                                                                                                                                                                 | ATP binding; motor activity; nucleoside phosphate binding; nucleoside binding; ion binding; hydrolase activity, acting on acid anhydrides; hydrolase activity; nucleotide binding; nucleoside-triphosphatase activity; organic cyclic compound binding; heterocyclic compound binding; ribonucleoside binding; carbohydrate derivative binding; pyrophosphatase activity; catalytic activity; ribonucleotide binding; binding; purine ribonucleotide binding; anion binding; purine ribonucleotide binding; adenylyl ribonucleotide binding; adenylyl nucleotide binding; purine nucleoside binding; hydrolase activity, acting on acid anhydrides, in phosphorus-containing anhydrides; purine nucleotide binding; small molecule binding; purine ribonucleoside triphosphate binding; | K10352 | MYH; myosin heavy chain | dre04530 Tight junction - Danio rerio (zebrafish);                                                                                                                                                                               | Danio rerio (zebrafish); | IPR002928; IPR004009; IPR001609; IPR027417; IPR027401; | Myosin tail; Myosin, N-terminal, SH3-like; Myosin head, motor domain; P-loop containing nucleoside triphosphate hydrolase; Myosin-like IQ motif-containing domain; |
| B8A561 | myh2.1.2 | Uncharacterized protein | _K(cr)DFETSQLLSK_        | 1085 | 1 | SEEKLLKKDFETSQ_L..E...K.....  | nuclear       | intracellular organelle; intracellular non-membrane-bounded organelle; cytoskeleton part; intracellular organelle part; macromolecular complex; intracellular part; cell; actin cytoskeleton; organelle part; non-membrane-bounded organelle; organelle; cytoskeleton; cell part; intracellular; myosin complex; protein complex;                                                                                                                                                                                                                                                                 | ATP binding; motor activity; nucleoside phosphate binding; nucleoside binding; ion binding; hydrolase activity, acting on acid anhydrides; hydrolase activity; nucleotide binding; nucleoside-triphosphatase activity; organic cyclic compound binding; heterocyclic compound binding; ribonucleoside binding; carbohydrate derivative binding; pyrophosphatase activity; catalytic activity; ribonucleotide binding; binding; purine ribonucleotide binding; anion binding; purine ribonucleotide binding; adenylyl ribonucleotide binding; adenylyl nucleotide binding; purine nucleoside binding; hydrolase activity, acting on acid anhydrides, in phosphorus-containing anhydrides; purine nucleotide binding; small molecule binding; purine ribonucleoside triphosphate binding; | K10352 | MYH; myosin heavy chain | dre04530 Tight junction - Danio rerio (zebrafish);                                                                                                                                                                               | Danio rerio (zebrafish); | IPR002928; IPR004009; IPR001609; IPR027417; IPR027401; | Myosin tail; Myosin, N-terminal, SH3-like; Myosin head, motor domain; P-loop containing nucleoside triphosphate hydrolase; Myosin-like IQ motif-containing domain; |
| E9QDY3 | cyt1     | Uncharacterized protein | _K(cr)DLESWFQAK_         | 288  | 1 | AVSANKRKDLESWFQ.....K.L.....  | mitochondria  | intracellular organelle; intracellular non-membrane-bounded organelle; cytoskeleton part; intracellular organelle part; macromolecular complex; intracellular part; cell; organelle part; non-membrane-bounded organelle; organelle; cytoskeleton; intermediate filament cytoskeleton; cell part; intracellular; intermediate filament; protein complex;                                                                                                                                                                                                                                          | structural molecule activity;                                                                                                                                                                                                                                                                                                                                                                                                                                                                                                                                                                                                                                                                                                                                                           | K07804 |                         |                                                                                                                                                                                                                                  |                          |                                                        |                                                                                                                                                                    |
| E7FES0 | -        | Uncharacterized protein | _K(cr)ELTELGEQKPHFEGIFK_ | 230  | 1 | VKSGELRKELTELGE.....K.L.....  | extracellular | lipid transport; single-organism process; lipid localization; organic substance transport; primary metabolic process; lipoprotein metabolic process; organic substance metabolic process; establishment of localization; transport; metabolic process; single-organism localization; protein metabolic process; macromolecule metabolic process; localization; macromolecule localization; single-organism transport;                                                                                                                                                                             | extracellular region;                                                                                                                                                                                                                                                                                                                                                                                                                                                                                                                                                                                                                                                                                                                                                                   |        |                         |                                                                                                                                                                                                                                  |                          | lipid binding; binding;                                |                                                                                                                                                                    |
| Q8AX99 | actn3b   | Actn3b                  | _K(cr)HEAFESDLAAHQDR_    | 447  | 1 | EIRALMRKHEAFESD.....K.E.....  | cytosol       | cellular component biogenesis; cellular component organization; actin crosslink formation; protein complex subunit organization; single-organism cellular process; actin filament organization; single-organism process; actin filament bundle assembly; actin filament bundle organization; macromolecular complex subunit organization; single-organism organelle organization; actin cytoskeleton organization; cellular component assembly; organelle organization; actin filament-based process; cytoskeleton organization; cellular process; cellular component organization or biogenesis; | cation binding; metal ion binding; calcium ion binding; binding; ion binding;                                                                                                                                                                                                                                                                                                                                                                                                                                                                                                                                                                                                                                                                                                           | K05699 | ACTN; actinin alpha     | dre04510 Focal adhesion - Danio rerio (zebrafish); dre04530 Tight junction - Danio rerio (zebrafish); dre04810 Regulation of actin cytoskeleton - Danio rerio (zebrafish); dre04520 Adherens junction - Danio rerio (zebrafish); | Danio rerio (zebrafish); | IPR014837; IPR002048; IPR011992; IPR001715;            | EF-hand, Ca insensitive; EF-hand domain; EF-hand domain pair; Calponin homology domain;                                                                            |
| D1GJ56 | actn3a   | Actn3a                  | _K(cr)HEAFESDLAAHQDR_    | 445  | 1 | EIRALMRKHEAFESD.....K.E.....  | cytosol       | cellular component biogenesis; cellular component organization; actin crosslink formation; protein complex subunit organization; single-organism cellular process; actin filament organization; single-organism process; actin filament bundle assembly; actin filament bundle organization; macromolecular complex subunit organization; single-organism organelle organization; actin cytoskeleton organization; cellular component assembly; organelle organization; actin filament-based process; cytoskeleton organization; cellular process; cellular component organization or biogenesis; | cation binding; metal ion binding; calcium ion binding; binding; ion binding;                                                                                                                                                                                                                                                                                                                                                                                                                                                                                                                                                                                                                                                                                                           | K05699 | ACTN; actinin alpha     | dre04510 Focal adhesion - Danio rerio (zebrafish); dre04530 Tight junction - Danio rerio (zebrafish); dre04810 Regulation of actin cytoskeleton - Danio rerio (zebrafish); dre04520 Adherens junction - Danio rerio (zebrafish); | Danio rerio (zebrafish); | IPR014837; IPR002048; IPR011992; IPR001715;            | EF-hand, Ca insensitive; EF-hand domain; EF-hand domain pair; Calponin homology domain;                                                                            |



|        |         |                                                 |                             |      |   |                 |              |                       |                                                                                                                                                                                                                                                                                                                                                                                                                                                                                                                                                                                                                                                                                                                                                                                                                                                                                                                                                                                                                                                                                                                                                                                                                                                                    |                                                                                                                                                                                                                                                                                                                                   |                                                                                                                                                                                                                                                                                                                                                                                                                                                                                                                                                                                                                                                                                                                                                                                         |                                                                                                    |                                                                                                                                                                                                                                                                                                                      |                                                        |                                                                                                                                                                    |
|--------|---------|-------------------------------------------------|-----------------------------|------|---|-----------------|--------------|-----------------------|--------------------------------------------------------------------------------------------------------------------------------------------------------------------------------------------------------------------------------------------------------------------------------------------------------------------------------------------------------------------------------------------------------------------------------------------------------------------------------------------------------------------------------------------------------------------------------------------------------------------------------------------------------------------------------------------------------------------------------------------------------------------------------------------------------------------------------------------------------------------------------------------------------------------------------------------------------------------------------------------------------------------------------------------------------------------------------------------------------------------------------------------------------------------------------------------------------------------------------------------------------------------|-----------------------------------------------------------------------------------------------------------------------------------------------------------------------------------------------------------------------------------------------------------------------------------------------------------------------------------|-----------------------------------------------------------------------------------------------------------------------------------------------------------------------------------------------------------------------------------------------------------------------------------------------------------------------------------------------------------------------------------------------------------------------------------------------------------------------------------------------------------------------------------------------------------------------------------------------------------------------------------------------------------------------------------------------------------------------------------------------------------------------------------------|----------------------------------------------------------------------------------------------------|----------------------------------------------------------------------------------------------------------------------------------------------------------------------------------------------------------------------------------------------------------------------------------------------------------------------|--------------------------------------------------------|--------------------------------------------------------------------------------------------------------------------------------------------------------------------|
| F1R446 | spna2   | Uncharacterized protein                         | _K(cr)HEDFDK_               | 1489 | 1 | SVEALIKKHEDFDKA | ..E...K..... | cytosol,nuclear       | developmental process; nervous system development; cellular component organization; single-multicellular organism process; development maturation; generation of neurons; system development; cellular developmental process; neuron development; single-organism cellular process; single-organism membrane organization; single-organism process; neurogenesis; neuronal ion channel clustering; multicellular organismal process; cell development; neuron differentiation; cell differentiation; single-organism developmental process; clustering of voltage-gated sodium channels; membrane organization; cell maturation; multicellular organismal development; neuron maturation; cellular process; anatomical structure development; cellular component organization or biogenesis;                                                                                                                                                                                                                                                                                                                                                                                                                                                                       | axon; cell projection; cell part; main axon; neuron projection; paranode region of axon; cell projection part; cell; neuron part; axon part; node of Ranvier;                                                                                                                                                                     | cation binding; metal ion binding; calcium ion binding; binding; ion binding;                                                                                                                                                                                                                                                                                                                                                                                                                                                                                                                                                                                                                                                                                                           | K06114                                                                                             | EF-hand, Ca insensitive; Spectrin alpha chain, SH3 domain; SH3 domain; EF-hand domain; EF-hand domain pair;                                                                                                                                                                                                          |                                                        |                                                                                                                                                                    |
| F1QS28 | hnpa0a  | Uncharacterized protein                         | _K(cr)FIGGLK_               | 102  | 1 | EALAKVVKFIGGLK  |              | nuclear               |                                                                                                                                                                                                                                                                                                                                                                                                                                                                                                                                                                                                                                                                                                                                                                                                                                                                                                                                                                                                                                                                                                                                                                                                                                                                    |                                                                                                                                                                                                                                                                                                                                   | organic cyclic compound binding; heterocyclic compound binding; nucleoside phosphate binding; binding; nucleic acid binding; nucleoside binding; small molecule binding;                                                                                                                                                                                                                                                                                                                                                                                                                                                                                                                                                                                                                | K12894                                                                                             | K12894 recogni motif domain; Nucleoside-binding, alpha-                                                                                                                                                                                                                                                              |                                                        |                                                                                                                                                                    |
| Q98U7  | myt3    | Fast skeletal muscle myosin light polypeptide 3 | _K(cr)LGDPSSADDM(alpha)ANK_ | 51   | 1 | PTNKDVKKLGDPSA  | .....K.L.... | cytosol               |                                                                                                                                                                                                                                                                                                                                                                                                                                                                                                                                                                                                                                                                                                                                                                                                                                                                                                                                                                                                                                                                                                                                                                                                                                                                    |                                                                                                                                                                                                                                                                                                                                   | cation binding; metal ion binding; calcium ion binding; binding; ion binding;                                                                                                                                                                                                                                                                                                                                                                                                                                                                                                                                                                                                                                                                                                           | IPR011992; IPR002048;                                                                              | EF-hand domain pair; EF-hand domain;                                                                                                                                                                                                                                                                                 |                                                        |                                                                                                                                                                    |
| B8JKH7 | myt3    | Uncharacterized protein                         | _K(cr)LGDPSSADDMANK_        | 75   | 1 | PTNKDVKKLGDPSA  | .....K.L.... | mitochondria          |                                                                                                                                                                                                                                                                                                                                                                                                                                                                                                                                                                                                                                                                                                                                                                                                                                                                                                                                                                                                                                                                                                                                                                                                                                                                    |                                                                                                                                                                                                                                                                                                                                   | cation binding; metal ion binding; calcium ion binding; binding; ion binding;                                                                                                                                                                                                                                                                                                                                                                                                                                                                                                                                                                                                                                                                                                           | IPR002048; IPR011992;                                                                              | EF-hand domain; EF-hand domain pair;                                                                                                                                                                                                                                                                                 |                                                        |                                                                                                                                                                    |
| Q98U7  | myt3    | Fast skeletal muscle myosin light polypeptide 3 | _K(cr)LGDPSSADDMANK_        | 51   | 1 | PTNKDVKKLGDPSA  | .....K.L.... | cytosol               |                                                                                                                                                                                                                                                                                                                                                                                                                                                                                                                                                                                                                                                                                                                                                                                                                                                                                                                                                                                                                                                                                                                                                                                                                                                                    |                                                                                                                                                                                                                                                                                                                                   | cation binding; metal ion binding; calcium ion binding; binding; ion binding;                                                                                                                                                                                                                                                                                                                                                                                                                                                                                                                                                                                                                                                                                                           | IPR011992; IPR002048;                                                                              | EF-hand domain pair; EF-hand domain;                                                                                                                                                                                                                                                                                 |                                                        |                                                                                                                                                                    |
| Q5T229 | apobb.1 | Uncharacterized protein                         | _K(cr)FLNAEAAK_             | 1209 | 1 | PEFTFPKFLNAEG   |              | endoplasmic reticulum | response to chemical; response to stimulus;                                                                                                                                                                                                                                                                                                                                                                                                                                                                                                                                                                                                                                                                                                                                                                                                                                                                                                                                                                                                                                                                                                                                                                                                                        |                                                                                                                                                                                                                                                                                                                                   | lipid transporter activity; substrate-specific transporter activity; transporter activity;                                                                                                                                                                                                                                                                                                                                                                                                                                                                                                                                                                                                                                                                                              | IPR011030; IPR015817; IPR015818; IPR001747; IPR015819; IPR015816; IPR016024; IPR015255; IPR009454; | Vitellogen, superhelical; Vitellogen, open beta-sheet, subdomain 1; Vitellogen, open beta-sheet, subdomain 2; Lipid transport protein, N-terminal; Lipid transport protein, beta-sheet shell; Vitellogen, beta-sheet N-terminal; Armadillo-type fold; Vitellogen, open beta-sheet; Lipid transport, open beta-sheet; |                                                        |                                                                                                                                                                    |
| Q6NWF6 | kr8     | Lamin B2                                        | _K(cr)LLEGEEDR_             | 417  | 1 | IEIATYRKLEGEED  | .....K.L.... | mitochondria          | intracellular organelle; intracellular non-membrane-bounded organelle; cytoskeletal part; intracellular organelle part; cytoplasm; nuclear lumen; macromolecular complex; intracellular part; cell; organelle part; keratin filament; non-membrane-bounded organelle; membrane-enclosed lumen; intracellular membrane-bounded organelle; organelle; cytoskeleton; nucleoplasm; nucleus; intracellular organelle lumen; intermediate filament cytoskeleton; intracellular; cell part; nuclear matrix; intermediate filament; nuclear periphery; membrane-bounded organelle; protein complex; organelle lumen; nuclear part;                                                                                                                                                                                                                                                                                                                                                                                                                                                                                                                                                                                                                                         |                                                                                                                                                                                                                                                                                                                                   | structural molecule activity;                                                                                                                                                                                                                                                                                                                                                                                                                                                                                                                                                                                                                                                                                                                                                           | K07605                                                                                             |                                                                                                                                                                                                                                                                                                                      |                                                        |                                                                                                                                                                    |
| F1QIR4 | -       | Uncharacterized protein                         | _K(cr)LSEKDEMEQAK_          | 1578 | 1 | VKADIERKLEKDEE  |              | cytosol               | cellular component biogenesis; muscle cell development; single-multicellular organism process; cellular component organization; muscle system process; cellular developmental process; cellular component morphogenesis; single-organism process; actin filament organization; cell development; anatomical structure morphogenesis; cell differentiation; actin cytoskeleton organization; muscle contraction; cellular component assembly; organelle assembly; macromolecular complex assembly; myofibril assembly; musculoskeletal movement; slow-twitch skeletal muscle fiber contraction; muscle structure development; cytoskeleton organization; anatomical structure formation involved in morphogenesis; cellular process; striated muscle myosin thick filament assembly; protein complex assembly; cellular protein complex assembly; skeletal muscle thin filament assembly; developmental process; cellular macromolecular complex assembly; striated muscle cell differentiation; actomyosin structure organization; system process; protein complex subunit organization; multicellular organismal movement; single-organism cellular process; cellular component assembly involved in morphogenesis; striated muscle contraction; myosin filament; | intracellular organelle; intracellular non-membrane-bounded organelle; cytoskeletal part; intracellular organelle part; macromolecular complex; intracellular part; cell; actin cytoskeleton; organelle part; non-membrane-bounded organelle; organelle; cytoskeleton; cell part; intracellular; myosin complex; protein complex; | ATP binding; motor activity; nucleoside phosphate binding; nucleoside binding; ion binding; hydrolase activity, acting on acid anhydrides; hydrolase activity; nucleotide binding; nucleoside-triphosphatase activity; organic cyclic compound binding; heterocyclic compound binding; ribonucleoside binding; carbohydrate derivative binding; pyrophosphatase activity; catalytic activity; ribonucleotide binding; binding; purine ribonucleoside binding; anion binding; purine ribonucleotide binding; adenylyl ribonucleotide binding; adenylyl nucleotide binding; purine nucleoside binding; hydrolase activity, acting on acid anhydrides, in phosphorus-containing anhydrides; purine nucleotide binding; small molecule binding; purine ribonucleoside triphosphate binding; | MYH; myosin heavy chain                                                                            | dre04530 Tight junction - Dario retio (zebrafish);                                                                                                                                                                                                                                                                   | IPR002928; IPR004009; IPR027417; IPR001609; IPR027401; | Myosin tail; Myosin, N-terminal, SH3-like; P-loop containing nucleoside triphosphate hydrolase; Myosin head, motor domain; Myosin-like IQ motif-containing domain; |

|        |         |                         |                         |      |   |                 |               |         |                                                                                                                                                                                                                                                                                                                                                                                                                                                                                                                                                                                                                                                                                                                                                                                                                                                                                                                                                                                                                                                                                                                                                                                                                                                                   |        |                                                         |                                                                                                                              |                                                        |                                                                                                                                                                    |
|--------|---------|-------------------------|-------------------------|------|---|-----------------|---------------|---------|-------------------------------------------------------------------------------------------------------------------------------------------------------------------------------------------------------------------------------------------------------------------------------------------------------------------------------------------------------------------------------------------------------------------------------------------------------------------------------------------------------------------------------------------------------------------------------------------------------------------------------------------------------------------------------------------------------------------------------------------------------------------------------------------------------------------------------------------------------------------------------------------------------------------------------------------------------------------------------------------------------------------------------------------------------------------------------------------------------------------------------------------------------------------------------------------------------------------------------------------------------------------|--------|---------------------------------------------------------|------------------------------------------------------------------------------------------------------------------------------|--------------------------------------------------------|--------------------------------------------------------------------------------------------------------------------------------------------------------------------|
| Q6IQD7 | tpm2    | Uncharacterized protein | _K(cr)LVILEGELER_       | 168  | 1 | KYEEVARKLVILEGE | .....K.V..... | cytosol |                                                                                                                                                                                                                                                                                                                                                                                                                                                                                                                                                                                                                                                                                                                                                                                                                                                                                                                                                                                                                                                                                                                                                                                                                                                                   | K10374 | TPM2; tropomyosin 2                                     | dre04260 Carabao muscle contraction - Danio rerio (zebrafish); dre04261 Adrenergic signaling in cardiomyocytes - Danio rerio |                                                        |                                                                                                                                                                    |
| P13104 | tpma    | Uncharacterized protein | _K(cr)LVIVEGELER_       | 168  | 1 | KYEEVARKLVIVEGE | .....K.V..... | cytosol | cytoskeleton; organelle; intracellular organelle; intracellular non-membrane-bounded organelle; cell part; intracellular; cytoplasm; intracellular part; cell; non-membrane-bounded organelle;                                                                                                                                                                                                                                                                                                                                                                                                                                                                                                                                                                                                                                                                                                                                                                                                                                                                                                                                                                                                                                                                    | K10373 | TPM1; tropomyosin 1                                     | dre04260 Carabao muscle contraction - Danio rerio (zebrafish); dre04261 Adrenergic signaling in cardiomyocytes - Danio rerio |                                                        |                                                                                                                                                                    |
| E7FAQ8 | hnmpa1a | Uncharacterized protein | _K(cr)MFVGGIK_          | 107  | 1 | GAHSTVKKMFVGGIK |               | nuclear | organic cyclic compound binding; heterocyclic compound binding; nucleoside phosphate binding; binding; nucleic acid binding; nucleotide binding; small molecule binding;                                                                                                                                                                                                                                                                                                                                                                                                                                                                                                                                                                                                                                                                                                                                                                                                                                                                                                                                                                                                                                                                                          | K12741 | TRRNPA1; heterogeneously nuclear ribonucleoprotein A1A2 | dre03040 Spliceosome - Danio rerio (zebrafish);                                                                              | IPR000504; IPR012677;                                  | RNA recognition motif domain; Nucleotide-binding, alpha-beta fold;                                                                                                 |
| B8A561 | myhz1.2 | Uncharacterized protein | _K(cr)NLEVTVK_          | 1786 | 1 | AHLERMKNLEVTVK  | .....K.L..... | nuclear | intracellular organelle; intracellular non-membrane-bounded organelle; cytoskeletal part; intracellular organelle part; macromolecular complex; intracellular part; cell; actin cytoskeleton; organelle part; non-membrane-bounded organelle; organelle; cytoskeleton; cell part; intracellular; myosin complex; protein complex;                                                                                                                                                                                                                                                                                                                                                                                                                                                                                                                                                                                                                                                                                                                                                                                                                                                                                                                                 | K10352 | MYH; myosin heavy chain                                 | dre04530 Tight junction - Danio rerio (zebrafish);                                                                           | IPR002928; IPR004009; IPR001609; IPR027417; IPR027401; | Myosin tail; Myosin, N-terminal, SH3-like; Myosin head, motor domain; P-loop containing nucleoside triphosphate hydrolase; Myosin-like IQ motif-containing domain; |
| B8A568 | myhz1.1 | Uncharacterized protein | _K(cr)QADSVAELEGOIDNLR_ | 1197 | 1 | TAALARKKQADSVAE |               | nuclear | intracellular organelle; intracellular non-membrane-bounded organelle; cytoskeletal part; intracellular organelle part; cell; actin cytoskeleton; organelle part; non-membrane-bounded organelle; organelle; cytoskeleton; cell part; intracellular; myosin complex; protein complex;                                                                                                                                                                                                                                                                                                                                                                                                                                                                                                                                                                                                                                                                                                                                                                                                                                                                                                                                                                             | K10352 | MYH; myosin heavy chain                                 | dre04530 Tight junction - Danio rerio (zebrafish);                                                                           | IPR002928; IPR004009; IPR001609; IPR027417; IPR027401; | Myosin tail; Myosin, N-terminal, SH3-like; Myosin head, motor domain; P-loop containing nucleoside triphosphate hydrolase; Myosin-like IQ motif-containing domain; |
| B8A561 | myhz1.2 | Uncharacterized protein | _K(cr)QADSVAELEGOIDNLR_ | 1197 | 1 | TAALARKKQADSVAE |               | nuclear | intracellular organelle; intracellular non-membrane-bounded organelle; cytoskeletal part; intracellular organelle part; macromolecular complex; intracellular part; cell; actin cytoskeleton; organelle part; non-membrane-bounded organelle; organelle; cytoskeleton; cell part; intracellular; myosin complex; protein complex;                                                                                                                                                                                                                                                                                                                                                                                                                                                                                                                                                                                                                                                                                                                                                                                                                                                                                                                                 | K10352 | MYH; myosin heavy chain                                 | dre04530 Tight junction - Danio rerio (zebrafish);                                                                           | IPR002928; IPR004009; IPR001609; IPR027417; IPR027401; | Myosin tail; Myosin, N-terminal, SH3-like; Myosin head, motor domain; P-loop containing nucleoside triphosphate hydrolase; Myosin-like IQ motif-containing domain; |
| F1QIR4 | -       | Uncharacterized protein | _K(cr)QLEQEK_           | 1534 | 1 | HELEKIRKQLEQEK  | .....K.L..... | cytosol | cellular component biogenesis; muscle cell development; single-multicellular organism process; cellular component organization; muscle system process; cellular developmental process; cellular component morphogenesis; single-organism process; actin filament organization; cell development; anatomical structure morphogenesis; cell differentiation; actin cytoskeleton organization; muscle contraction; cellular component assembly; organelle assembly; macromolecular complex assembly; myofibril assembly; musculoskeletal movement; slow-twitch skeletal muscle fiber contraction; muscle structure development; cytoskeleton organization; anatomical structure formation involved in morphogenesis; cellular process; striated muscle myosin thick filament assembly; protein complex assembly; cellular protein complex assembly; skeletal muscle thin filament assembly; developmental process; cellular macromolecular complex assembly; striated muscle cell differentiation; actomyosin structure organization; system process; protein complex subunit organization; multicellular organismal movement; single-organism cellular process; cellular component assembly involved in morphogenesis; striated muscle contraction; myosin filament | K10352 | MYH; myosin heavy chain                                 | dre04530 Tight junction - Danio rerio (zebrafish);                                                                           | IPR002928; IPR004009; IPR027417; IPR001609; IPR027401; | Myosin tail; Myosin, N-terminal, SH3-like; P-loop containing nucleoside triphosphate hydrolase; Myosin head, motor domain; Myosin-like IQ motif-containing domain; |
| B3DFN3 | Innb2   | Lamin B2                | _K(cr)SMFDEEVR_         | 203  | 1 | TEELEFRKSMFDEEV | ..E...K.....  | nuclear | intracellular organelle; intracellular non-membrane-bounded organelle; cytoskeletal part; intracellular organelle part; macromolecular complex; intracellular part; cell; organelle part; non-membrane-bounded organelle; organelle; cytoskeleton; intermediate filament cytoskeleton; cell part; intracellular; intermediate filament; protein complex;                                                                                                                                                                                                                                                                                                                                                                                                                                                                                                                                                                                                                                                                                                                                                                                                                                                                                                          | K07611 |                                                         |                                                                                                                              | IPR001322;                                             | Lamin Tail Domain;                                                                                                                                                 |

|        |          |                                                   |                     |      |   |                  |              |                                                                                                                                                                                                                                                                                                                                                          |                                                                                                                                                                                                                                                                                                                                                                                                                                                                                                                                 |                                                                                                                                                                                                                                                                                                                                                                                                                                                                                                                                                                                                                                                                                                                                                                                                                                                |                         |                                                                                                      |                                                                            |                                                                                                                                                                    |                               |
|--------|----------|---------------------------------------------------|---------------------|------|---|------------------|--------------|----------------------------------------------------------------------------------------------------------------------------------------------------------------------------------------------------------------------------------------------------------------------------------------------------------------------------------------------------------|---------------------------------------------------------------------------------------------------------------------------------------------------------------------------------------------------------------------------------------------------------------------------------------------------------------------------------------------------------------------------------------------------------------------------------------------------------------------------------------------------------------------------------|------------------------------------------------------------------------------------------------------------------------------------------------------------------------------------------------------------------------------------------------------------------------------------------------------------------------------------------------------------------------------------------------------------------------------------------------------------------------------------------------------------------------------------------------------------------------------------------------------------------------------------------------------------------------------------------------------------------------------------------------------------------------------------------------------------------------------------------------|-------------------------|------------------------------------------------------------------------------------------------------|----------------------------------------------------------------------------|--------------------------------------------------------------------------------------------------------------------------------------------------------------------|-------------------------------|
| Q8JH0  | slc25a5  | Solute carrier family 25 alpha, member 5          | _K(cr)VFLDGVDK_     | 97   | 1 | AFKDKYKVFLDGVD   | cytosol      | transport; transmembrane transport; single-organism localization; single-organism cellular process; single-organism process; localization; cellular process; single-organism transport; establishment of localization;                                                                                                                                   | intracellular organelle; membrane; mitochondrial part; organelle membrane; organelle envelope; intracellular organelle part; cytoplasm; intrinsic component of membrane; intracellular part; cell; integral component of membrane; organelle part; mitochondrion; organelle; intracellular membrane-bounded organelle; mitochondrial envelope; intracellular; cell part; membrane part; envelope; organelle inner membrane; membrane-bounded organelle; mitochondrial inner membrane; mitochondrial membrane; cytoplasmic part; | transporter activity;                                                                                                                                                                                                                                                                                                                                                                                                                                                                                                                                                                                                                                                                                                                                                                                                                          | K05863                  | SLC25A4S ; solute carrier family 25 (mitochondrial adenine nucleotide translocator), member 4/5/6/31 | dre04020 Calcium signaling pathway - Danio rerio (zebrafish);              | IPR023395;                                                                                                                                                         | Mitochondrial carrier domain; |
| Q7ZTS4 | qrt18    | Keratin, type I cytoskeletal 18                   | _K(cr)VDDTNLNR_     | 191  | 1 | ADITGLRKVIDDTNL  | mitochondria | intracellular organelle; intracellular non-membrane-bounded organelle; cytoskeletal part; intracellular organelle part; macromolecular complex; intracellular part; cell; organelle part; non-membrane-bounded organelle; organelle; cytoskeleton; intermediate filament cytoskeleton; cell part; intracellular; intermediate filament; protein complex; | intracellular organelle; intracellular non-membrane-bounded organelle; cytoskeletal part; intracellular organelle part; macromolecular complex; intracellular part; cell; organelle part; non-membrane-bounded organelle; organelle; cytoskeleton; intermediate filament cytoskeleton; cell part; intracellular; intermediate filament; protein complex;                                                                                                                                                                        | structural molecule activity;                                                                                                                                                                                                                                                                                                                                                                                                                                                                                                                                                                                                                                                                                                                                                                                                                  | K07604                  |                                                                                                      |                                                                            |                                                                                                                                                                    |                               |
| E9QDY3 | cyt1     | Uncharacterized protein                           | _K(cr)VLDLMT(ox)TR_ | 211  | 1 | ADVGLRKLVDLMT    | mitochondria | intracellular organelle; intracellular non-membrane-bounded organelle; cytoskeletal part; intracellular organelle part; macromolecular complex; intracellular part; cell; organelle part; non-membrane-bounded organelle; organelle; cytoskeleton; intermediate filament cytoskeleton; cell part; intracellular; intermediate filament; protein complex; | intracellular organelle; intracellular non-membrane-bounded organelle; cytoskeletal part; intracellular organelle part; macromolecular complex; intracellular part; cell; organelle part; non-membrane-bounded organelle; organelle; cytoskeleton; intermediate filament cytoskeleton; cell part; intracellular; intermediate filament; protein complex;                                                                                                                                                                        | structural molecule activity;                                                                                                                                                                                                                                                                                                                                                                                                                                                                                                                                                                                                                                                                                                                                                                                                                  | K07604                  |                                                                                                      |                                                                            |                                                                                                                                                                    |                               |
| E9QDY3 | cyt1     | Uncharacterized protein                           | _K(cr)VLDLMTMR_     | 211  | 1 | ADVGLRKLVDLMT    | mitochondria | intracellular organelle; intracellular non-membrane-bounded organelle; cytoskeletal part; intracellular organelle part; macromolecular complex; intracellular part; cell; organelle part; non-membrane-bounded organelle; organelle; cytoskeleton; intermediate filament cytoskeleton; cell part; intracellular; intermediate filament; protein complex; | intracellular organelle; intracellular non-membrane-bounded organelle; cytoskeletal part; intracellular organelle part; macromolecular complex; intracellular part; cell; organelle part; non-membrane-bounded organelle; organelle; cytoskeleton; intermediate filament cytoskeleton; cell part; intracellular; intermediate filament; protein complex;                                                                                                                                                                        | structural molecule activity;                                                                                                                                                                                                                                                                                                                                                                                                                                                                                                                                                                                                                                                                                                                                                                                                                  | K07604                  |                                                                                                      |                                                                            |                                                                                                                                                                    |                               |
| P13104 | tpma     | Uncharacterized protein                           | _K(cr)YEEVAR_       | 161  | 1 | IAEEADRRKVEEVARK | cytosol      | cytoskeleton; organelle; intracellular organelle; intracellular non-membrane-bounded organelle; cell part; intracellular; cytoplasm; intracellular part; cell; non-membrane-bounded organelle;                                                                                                                                                           | cytoskeleton; organelle; intracellular organelle; intracellular non-membrane-bounded organelle; cell part; intracellular; cytoplasm; intracellular part; cell; non-membrane-bounded organelle;                                                                                                                                                                                                                                                                                                                                  |                                                                                                                                                                                                                                                                                                                                                                                                                                                                                                                                                                                                                                                                                                                                                                                                                                                | K10373                  | TPM1; tropomyosin 1                                                                                  | dre04261 Adrenergic signaling in cardiomyocytes - Danio rerio (zebrafish); |                                                                                                                                                                    |                               |
| Q6IQX1 | myh2     | Myosin, heavy polypeptide 2, fast muscle specific | _KK(cr)DFETAQLLSK_  | 1085 | 1 | SEEKIKKKDFETAQL  | cytosol      | response to stress; response to stimulus;                                                                                                                                                                                                                                                                                                                | intracellular organelle; intracellular non-membrane-bounded organelle; cytoskeletal part; intracellular organelle part; macromolecular complex; intracellular part; cell; actin cytoskeleton; organelle part; non-membrane-bounded organelle; organelle; cytoskeleton; cell part; intracellular; myosin complex; protein complex;                                                                                                                                                                                               | ATP binding; motor activity; nucleoside phosphate binding; nucleoside binding; ion binding; hydrolase activity, acting on acid anhydrides; hydrolase activity; nucleotide binding; heterocyclic compound binding; ribonucleoside binding; nucleoside-triphosphatase activity; organic cyclic compound binding; heterocyclic compound binding; ribonucleoside binding; carbohydrate derivative binding; pyrophosphatase activity; catalytic activity; ribonucleotide binding; binding; purine ribonucleoside binding; anion binding; purine ribonucleotide binding; adenylyl ribonucleotide binding; adenylyl nucleotide binding; purine nucleoside binding; hydrolase activity, acting on acid anhydrides, in phosphorus-containing anhydrides; purine nucleotide binding; small molecule binding; purine ribonucleoside triphosphate binding; | MYH; myosin heavy chain | dre04530 Tight junction - Danio rerio (zebrafish);                                                   | IPR002928; IPR004009; IPR001609; IPR027417; IPR027401;                     | Myosin tail; Myosin, N-terminal, SH3-like; Myosin head, motor domain; P-loop containing nucleoside triphosphate hydrolase; Myosin-like IQ motif-containing domain; |                               |
| B8A568 | myh2.1.1 | Uncharacterized protein                           | _KK(cr)ELEEK_       | 873  | 1 | AKAEAKKKELEEKMV  | nuclear      |                                                                                                                                                                                                                                                                                                                                                          | intracellular organelle; intracellular non-membrane-bounded organelle; cytoskeletal part; intracellular organelle part; macromolecular complex; intracellular part; cell; actin cytoskeleton; organelle part; non-membrane-bounded organelle; organelle; cytoskeleton; cell part; intracellular; myosin complex; protein complex;                                                                                                                                                                                               | ATP binding; motor activity; nucleoside phosphate binding; nucleoside binding; ion binding; hydrolase activity, acting on acid anhydrides; hydrolase activity; nucleotide binding; heterocyclic compound binding; ribonucleoside binding; nucleoside-triphosphatase activity; organic cyclic compound binding; heterocyclic compound binding; ribonucleoside binding; carbohydrate derivative binding; pyrophosphatase activity; catalytic activity; ribonucleotide binding; binding; purine ribonucleoside binding; anion binding; purine ribonucleotide binding; adenylyl ribonucleotide binding; adenylyl nucleotide binding; purine nucleoside binding; hydrolase activity, acting on acid anhydrides, in phosphorus-containing anhydrides; purine nucleotide binding; small molecule binding; purine ribonucleoside triphosphate binding; | MYH; myosin heavy chain | dre04530 Tight junction - Danio rerio (zebrafish);                                                   | IPR002928; IPR004009; IPR001609; IPR027417; IPR027401;                     | Myosin tail; Myosin, N-terminal, SH3-like; Myosin head, motor domain; P-loop containing nucleoside triphosphate hydrolase; Myosin-like IQ motif-containing domain; |                               |
| B8A561 | myh2.1.2 | Uncharacterized protein                           | _KK(cr)ELEEK_       | 873  | 1 | AKAEAKKKELEEKMV  | nuclear      |                                                                                                                                                                                                                                                                                                                                                          | intracellular organelle; intracellular non-membrane-bounded organelle; cytoskeletal part; intracellular organelle part; macromolecular complex; intracellular part; cell; actin cytoskeleton; organelle part; non-membrane-bounded organelle; organelle; cytoskeleton; cell part; intracellular; myosin complex; protein complex;                                                                                                                                                                                               | ATP binding; motor activity; nucleoside phosphate binding; nucleoside binding; ion binding; hydrolase activity, acting on acid anhydrides; hydrolase activity; nucleotide binding; heterocyclic compound binding; ribonucleoside binding; nucleoside-triphosphatase activity; organic cyclic compound binding; heterocyclic compound binding; ribonucleoside binding; carbohydrate derivative binding; pyrophosphatase activity; catalytic activity; ribonucleotide binding; binding; purine ribonucleoside binding; anion binding; purine ribonucleotide binding; adenylyl ribonucleotide binding; adenylyl nucleotide binding; purine nucleoside binding; hydrolase activity, acting on acid anhydrides, in phosphorus-containing anhydrides; purine nucleotide binding; small molecule binding; purine ribonucleoside triphosphate binding; | MYH; myosin heavy chain | dre04530 Tight junction - Danio rerio (zebrafish);                                                   | IPR002928; IPR004009; IPR001609; IPR027417; IPR027401;                     | Myosin tail; Myosin, N-terminal, SH3-like; Myosin head, motor domain; P-loop containing nucleoside triphosphate hydrolase; Myosin-like IQ motif-containing domain; |                               |
| E7EXP0 | tnn3b    | Uncharacterized protein                           | KKEEELIALK(cr)DR    | 72   | 1 | EEELIALKDRIEKR   | nuclear      |                                                                                                                                                                                                                                                                                                                                                          | intracellular organelle; intracellular non-membrane-bounded organelle; cytoskeletal part; intracellular organelle part; macromolecular complex; intracellular part; cell; actin cytoskeleton; organelle part; non-membrane-bounded organelle; organelle; cytoskeleton; cell part; intracellular; myosin complex; protein complex;                                                                                                                                                                                               | ATP binding; motor activity; nucleoside phosphate binding; nucleoside binding; ion binding; hydrolase activity, acting on acid anhydrides; hydrolase activity; nucleotide binding; heterocyclic compound binding; ribonucleoside binding; nucleoside-triphosphatase activity; organic cyclic compound binding; heterocyclic compound binding; ribonucleoside binding; carbohydrate derivative binding; pyrophosphatase activity; catalytic activity; ribonucleotide binding; binding; purine ribonucleoside binding; anion binding; purine ribonucleotide binding; adenylyl ribonucleotide binding; adenylyl nucleotide binding; purine nucleoside binding; hydrolase activity, acting on acid anhydrides, in phosphorus-containing anhydrides; purine nucleotide binding; small molecule binding; purine ribonucleoside triphosphate binding; |                         | K12046                                                                                               |                                                                            |                                                                                                                                                                    |                               |

|        |         |                                          |                       |      |   |                 |               |         |                                                                                                                                                                                                                                                                                                                                                                                                                                                                                                                                                                                                                                                                                                                                                                                                                                                                                                                                                                                                                                                                                                                                                                                                                                                                   |                                                                                                                                                                                                                                                                                                                                                                                                                                                                                                                                                                                                                                                                                                                                                                                                                                                                                                                    |                       |                                   |                                                                                                     |                                                                                                                                                                                                    |                                                                                                                                                                    |                               |
|--------|---------|------------------------------------------|-----------------------|------|---|-----------------|---------------|---------|-------------------------------------------------------------------------------------------------------------------------------------------------------------------------------------------------------------------------------------------------------------------------------------------------------------------------------------------------------------------------------------------------------------------------------------------------------------------------------------------------------------------------------------------------------------------------------------------------------------------------------------------------------------------------------------------------------------------------------------------------------------------------------------------------------------------------------------------------------------------------------------------------------------------------------------------------------------------------------------------------------------------------------------------------------------------------------------------------------------------------------------------------------------------------------------------------------------------------------------------------------------------|--------------------------------------------------------------------------------------------------------------------------------------------------------------------------------------------------------------------------------------------------------------------------------------------------------------------------------------------------------------------------------------------------------------------------------------------------------------------------------------------------------------------------------------------------------------------------------------------------------------------------------------------------------------------------------------------------------------------------------------------------------------------------------------------------------------------------------------------------------------------------------------------------------------------|-----------------------|-----------------------------------|-----------------------------------------------------------------------------------------------------|----------------------------------------------------------------------------------------------------------------------------------------------------------------------------------------------------|--------------------------------------------------------------------------------------------------------------------------------------------------------------------|-------------------------------|
| Q92005 | ee1a    | Elongation factor 1-alpha                | _KLEDNPK(cr)ALK_      | 392  | 1 | KKLEDNPKALKSGDA | .....K.L..... | cytosol | intracellular part; cell; cell part; intracellular cytoplasm;                                                                                                                                                                                                                                                                                                                                                                                                                                                                                                                                                                                                                                                                                                                                                                                                                                                                                                                                                                                                                                                                                                                                                                                                     | nucleoside phosphate binding; translation elongation factor activity; hydrolase activity, acting on acid anhydrides; hydrolase activity; organic cyclic compound binding; heterocyclic compound binding; pyrophosphatase activity; catalytic activity; ribonucleoside binding; binding; GTPase activity; purine ribonucleoside binding; anion binding; hydrolase activity, acting on acid anhydrides, in phosphorus-containing anhydrides; guanyl nucleoside binding; GTP binding; purine nucleoside binding; purine ribonucleoside triphosphate binding; RNA binding; ion binding; nucleoside binding; nucleoside binding; nucleoside-triphosphatase activity; ribonucleoside binding; translation factor activity, nucleic acid binding; carbohydrate derivative binding; nucleic acid binding; purine ribonucleoside binding; guanyl ribonucleoside binding; purine nucleoside binding; small molecule binding; | K03231                | EEF1A1; elongation factor 1-alpha | dre03013 RNA transport - Danio rerio (zebrafish);                                                   | IPR004160; IPR004161; IPR009001; factor IP2gamma, C-terminal; P-loop containing nucleoside triphosphate hydrolase; Elongation factor, GTP-binding domain; Translation protein, beta-barrel domain; |                                                                                                                                                                    |                               |
| F1QIR4 | -       | Uncharacterized protein                  | _KLSEK(cr)DEEM(x)EQA_ | 1582 | 1 | IERKLSKDEEMEA   | .....K.E..... | cytosol | cellular component biogenesis; muscle cell development; single-multicellular organism process; cellular component organization; muscle system process; cellular developmental process; cellular component morphogenesis; single-organism process; actin filament organization; cell development; anatomical structure morphogenesis; cell differentiation; actin cytoskeleton organization; muscle contraction; cellular component assembly; organelle assembly; macromolecular complex assembly; myofibril assembly; musculoskeletal movement; slow-twitch skeletal muscle fiber contraction; muscle structure development; cytoskeleton organization; anatomical structure formation involved in morphogenesis; cellular process; striated muscle myosin thick filament assembly; protein complex assembly; cellular protein complex assembly; skeletal muscle thin filament assembly; developmental process; cellular macromolecular complex assembly; striated muscle cell differentiation; actomyosin structure organization; system process; protein complex subunit organization; multicellular organismal movement; single-organism cellular process; cellular component assembly involved in morphogenesis; striated muscle contraction; myosin filament | ATP binding; motor activity; nucleoside phosphate binding; nucleoside binding; ion binding; hydrolase activity, acting on acid anhydrides; hydrolase activity; nucleoside binding; nucleoside-triphosphatase activity; organic cyclic compound binding; heterocyclic compound binding; ribonucleoside binding; carbohydrate derivative binding; pyrophosphatase activity; catalytic activity; ribonucleoside binding; binding; purine ribonucleoside binding; anion binding; purine ribonucleoside binding; adenylyl ribonucleoside binding; adenylyl nucleotide binding; purine nucleoside binding; hydrolase activity, acting on acid anhydrides, in phosphorus-containing anhydrides; purine nucleotide binding; small molecule binding; purine ribonucleoside triphosphate binding;                                                                                                                            | K10352                | MYH; myosin heavy chain           | dre04530 Tight junction - Danio rerio (zebrafish);                                                  | IPR002928; IPR004009; IPR027417; IPR001609; IPR027401;                                                                                                                                             | Myosin tail; Myosin, N-terminal, SH3-like; P-loop containing nucleoside triphosphate hydrolase; Myosin head, motor domain; Myosin-like IQ motif-containing domain; |                               |
| F1QIR4 | -       | Uncharacterized protein                  | _KLSEK(cr)DEEMEQAK_   | 1582 | 1 | IERKLSKDEEMEA   | .....K.E..... | cytosol | cellular component biogenesis; muscle cell development; single-multicellular organism process; cellular component organization; muscle system process; cellular developmental process; cellular component morphogenesis; single-organism process; actin filament organization; cell development; anatomical structure morphogenesis; cell differentiation; actin cytoskeleton organization; muscle contraction; cellular component assembly; organelle assembly; myofibril assembly; musculoskeletal movement; slow-twitch skeletal muscle fiber contraction; muscle structure development; cytoskeleton organization; anatomical structure formation involved in morphogenesis; cellular process; striated muscle myosin thick filament assembly; protein complex assembly; cellular protein complex assembly; skeletal muscle thin filament assembly; developmental process; cellular macromolecular complex assembly; striated muscle cell differentiation; actomyosin structure organization; system process; protein complex subunit organization; multicellular organismal movement; single-organism cellular process; cellular component assembly involved in morphogenesis; striated muscle contraction; myosin filament                                  | ATP binding; motor activity; nucleoside phosphate binding; nucleoside binding; ion binding; hydrolase activity, acting on acid anhydrides; hydrolase activity; nucleoside binding; nucleoside-triphosphatase activity; organic cyclic compound binding; heterocyclic compound binding; ribonucleoside binding; carbohydrate derivative binding; pyrophosphatase activity; catalytic activity; ribonucleoside binding; binding; purine ribonucleoside binding; anion binding; purine ribonucleoside binding; adenylyl ribonucleoside binding; adenylyl nucleotide binding; purine nucleoside binding; hydrolase activity, acting on acid anhydrides, in phosphorus-containing anhydrides; purine nucleotide binding; small molecule binding; purine ribonucleoside triphosphate binding;                                                                                                                            | K10352                | MYH; myosin heavy chain           | dre04530 Tight junction - Danio rerio (zebrafish);                                                  | IPR002928; IPR004009; IPR027417; IPR001609; IPR027401;                                                                                                                                             | Myosin tail; Myosin, N-terminal, SH3-like; P-loop containing nucleoside triphosphate hydrolase; Myosin head, motor domain; Myosin-like IQ motif-containing domain; |                               |
| Q8JH0  | slc25a5 | Solute carrier family 25 alpha, member 5 | _LAADVKG(cr)JAGAER_   | 147  | 1 | RLAADVGKAGAERF  |               | cytosol | transport; transmembrane transport; single-organism localization; single-organism cellular process; single-organism process; localization; cellular process; single-organism transport; establishment of localization;                                                                                                                                                                                                                                                                                                                                                                                                                                                                                                                                                                                                                                                                                                                                                                                                                                                                                                                                                                                                                                            | intracellular organelle; membrane; mitochondrial part; organelle membrane; organelle envelope; intracellular organelle part; cytoplasm; intrinsic component of membrane; intracellular part; cell; integral component of membrane; organelle part; mitochondrion; organelle; intracellular membrane-bounded organelle; mitochondrial envelope; intracellular; cell part; membrane part; envelope; organelle inner membrane; membrane-bounded organelle; mitochondrial inner membrane; mitochondrial membrane; cytoplasmic part;                                                                                                                                                                                                                                                                                                                                                                                    | transporter activity; | K05863                            | SLC25A4S; solute carrier family 25 (mitochondrial adenine nucleotide translocator), member 4/5/6/31 | dre04020 Calcium signaling pathway - Danio rerio (zebrafish);                                                                                                                                      | IPR023395;                                                                                                                                                         | Mitochondrial carrier domain; |

|        |            |                                                   |                           |      |   |                 |               |               |                                                                                                                                                                                                                                                                                                                                                                                                                                                                                                                                                                                                                                                                                 |                                                                                                                                                                                                                                                                                                                                                                                                                                                                                                                                                                                                                                                                                                                                                                                         |                                                                                                                                                                                                                                                                                                                                                                                                                                                                                                                                                                                                                                                                                                                                                                                         |                         |                                                    |                                                        |                                                                                                                                                                    |                                                                                                                                                                    |
|--------|------------|---------------------------------------------------|---------------------------|------|---|-----------------|---------------|---------------|---------------------------------------------------------------------------------------------------------------------------------------------------------------------------------------------------------------------------------------------------------------------------------------------------------------------------------------------------------------------------------------------------------------------------------------------------------------------------------------------------------------------------------------------------------------------------------------------------------------------------------------------------------------------------------|-----------------------------------------------------------------------------------------------------------------------------------------------------------------------------------------------------------------------------------------------------------------------------------------------------------------------------------------------------------------------------------------------------------------------------------------------------------------------------------------------------------------------------------------------------------------------------------------------------------------------------------------------------------------------------------------------------------------------------------------------------------------------------------------|-----------------------------------------------------------------------------------------------------------------------------------------------------------------------------------------------------------------------------------------------------------------------------------------------------------------------------------------------------------------------------------------------------------------------------------------------------------------------------------------------------------------------------------------------------------------------------------------------------------------------------------------------------------------------------------------------------------------------------------------------------------------------------------------|-------------------------|----------------------------------------------------|--------------------------------------------------------|--------------------------------------------------------------------------------------------------------------------------------------------------------------------|--------------------------------------------------------------------------------------------------------------------------------------------------------------------|
| B8A568 | myhz1.1    | Uncharacterized protein                           | _LAEK(cr)DEEIEQKR_        | 1581 | 1 | IDRKLAEKDEEIEQI | .....K.E..... | nuclear       | intracellular organelle; intracellular non-membrane-bounded organelle; cytoskeleton part; intracellular organelle part; macromolecular complex; intracellular part; cell; actin cytoskeleton; organelle part; non-membrane-bounded organelle; organelle; cytoskeleton; cell part; intracellular; myosin complex; protein complex;                                                                                                                                                                                                                                                                                                                                               | ATP binding; motor activity; nucleoside phosphate binding; nucleoside binding; ion binding; hydrolase activity, acting on acid anhydrides; hydrolase activity; nucleotide binding; nucleoside-triphosphatase activity; organic cyclic compound binding; heterocyclic compound binding; ribonucleoside binding; carbohydrate derivative binding; pyrophosphatase activity; catalytic activity; ribonucleotide binding; binding; purine ribonucleotide binding; anion binding; purine ribonucleotide binding; adenylyl ribonucleotide binding; adenylyl nucleotide binding; purine nucleoside binding; hydrolase activity, acting on acid anhydrides, in phosphorus-containing anhydrides; purine nucleotide binding; small molecule binding; purine ribonucleoside triphosphate binding; | K10352                                                                                                                                                                                                                                                                                                                                                                                                                                                                                                                                                                                                                                                                                                                                                                                  | MYH; myosin heavy chain | dre04530 Tight junction - Danio rerio (zebrafish); | IPR002928; IPR004009; IPR001609; IPR027417; IPR027401; | Myosin tail; Myosin, N-terminal, SH3-like; Myosin head, motor domain; P-loop containing nucleoside triphosphate hydrolase; Myosin-like IQ motif-containing domain; |                                                                                                                                                                    |
| Q6IQX1 | myhz2      | Myosin, heavy polypeptide 2, fast muscle specific | _LAEK(cr)DEEIEQIK_        | 1581 | 1 | IDRKLAEKDEEIEQI | .....K.E..... | cytosol       | response to stress; response to stimulus;                                                                                                                                                                                                                                                                                                                                                                                                                                                                                                                                                                                                                                       | intracellular organelle; intracellular non-membrane-bounded organelle; cytoskeleton part; intracellular organelle part; macromolecular complex; intracellular part; cell; actin cytoskeleton; organelle part; non-membrane-bounded organelle; organelle; cytoskeleton; cell part; intracellular; myosin complex; protein complex;                                                                                                                                                                                                                                                                                                                                                                                                                                                       | ATP binding; motor activity; nucleoside phosphate binding; nucleoside binding; ion binding; hydrolase activity, acting on acid anhydrides; hydrolase activity; nucleotide binding; nucleoside-triphosphatase activity; organic cyclic compound binding; heterocyclic compound binding; ribonucleoside binding; carbohydrate derivative binding; pyrophosphatase activity; catalytic activity; ribonucleotide binding; binding; purine ribonucleotide binding; anion binding; purine ribonucleotide binding; adenylyl ribonucleotide binding; adenylyl nucleotide binding; purine nucleoside binding; hydrolase activity, acting on acid anhydrides, in phosphorus-containing anhydrides; purine nucleotide binding; small molecule binding; purine ribonucleoside triphosphate binding; | K10352                  | MYH; myosin heavy chain                            | dre04530 Tight junction - Danio rerio (zebrafish);     | IPR002928; IPR004009; IPR001609; IPR027417; IPR027401;                                                                                                             | Myosin tail; Myosin, N-terminal, SH3-like; Myosin head, motor domain; P-loop containing nucleoside triphosphate hydrolase; Myosin-like IQ motif-containing domain; |
| B8A568 | myhz1.1    | Uncharacterized protein                           | _LAEKDEEIEQIK(cr)_        | 1589 | 1 | DEEIEQKRNSQRIT  | ..E...K.....  | nuclear       | intracellular organelle; intracellular non-membrane-bounded organelle; cytoskeleton part; intracellular organelle part; macromolecular complex; intracellular part; cell; actin cytoskeleton; organelle part; non-membrane-bounded organelle; organelle; cytoskeleton; cell part; intracellular; myosin complex; protein complex;                                                                                                                                                                                                                                                                                                                                               | ATP binding; motor activity; nucleoside phosphate binding; nucleoside binding; ion binding; hydrolase activity, acting on acid anhydrides; hydrolase activity; nucleotide binding; nucleoside-triphosphatase activity; organic cyclic compound binding; heterocyclic compound binding; ribonucleoside binding; carbohydrate derivative binding; pyrophosphatase activity; catalytic activity; ribonucleotide binding; binding; purine ribonucleotide binding; anion binding; purine ribonucleotide binding; adenylyl ribonucleotide binding; adenylyl nucleotide binding; purine nucleoside binding; hydrolase activity, acting on acid anhydrides, in phosphorus-containing anhydrides; purine nucleotide binding; small molecule binding; purine ribonucleoside triphosphate binding; | K10352                                                                                                                                                                                                                                                                                                                                                                                                                                                                                                                                                                                                                                                                                                                                                                                  | MYH; myosin heavy chain | dre04530 Tight junction - Danio rerio (zebrafish); | IPR002928; IPR004009; IPR001609; IPR027417; IPR027401; | Myosin tail; Myosin, N-terminal, SH3-like; Myosin head, motor domain; P-loop containing nucleoside triphosphate hydrolase; Myosin-like IQ motif-containing domain; |                                                                                                                                                                    |
| Q6IQX1 | myhz2      | Myosin, heavy polypeptide 2, fast muscle specific | _LAEKDEEIEQIK(cr)_        | 1589 | 1 | DEEIEQKRNSQRIT  | ..E...K.....  | cytosol       | response to stress; response to stimulus;                                                                                                                                                                                                                                                                                                                                                                                                                                                                                                                                                                                                                                       | intracellular organelle; intracellular non-membrane-bounded organelle; cytoskeleton part; intracellular organelle part; macromolecular complex; intracellular part; cell; actin cytoskeleton; organelle part; non-membrane-bounded organelle; organelle; cytoskeleton; cell part; intracellular; myosin complex; protein complex;                                                                                                                                                                                                                                                                                                                                                                                                                                                       | ATP binding; motor activity; nucleoside phosphate binding; nucleoside binding; ion binding; hydrolase activity, acting on acid anhydrides; hydrolase activity; nucleotide binding; nucleoside-triphosphatase activity; organic cyclic compound binding; heterocyclic compound binding; ribonucleoside binding; carbohydrate derivative binding; pyrophosphatase activity; catalytic activity; ribonucleotide binding; binding; purine ribonucleotide binding; anion binding; purine ribonucleotide binding; adenylyl ribonucleotide binding; adenylyl nucleotide binding; purine nucleoside binding; hydrolase activity, acting on acid anhydrides, in phosphorus-containing anhydrides; purine nucleotide binding; small molecule binding; purine ribonucleoside triphosphate binding; | K10352                  | MYH; myosin heavy chain                            | dre04530 Tight junction - Danio rerio (zebrafish);     | IPR002928; IPR004009; IPR001609; IPR027417; IPR027401;                                                                                                             | Myosin tail; Myosin, N-terminal, SH3-like; Myosin head, motor domain; P-loop containing nucleoside triphosphate hydrolase; Myosin-like IQ motif-containing domain; |
| E7FZ25 | zgc:163061 | Uncharacterized protein                           | _LAIK(cr)GMVTK_           | 77   | 1 | SRVKLAKGMVTKGV  |               | nuclear       | cellular component biogenesis; cellular component organization; nucleosome organization; cellular macromolecular complex assembly; chromatin assembly or disassembly; protein complex subunit organization; macromolecular complex subunit organization; protein-DNA complex assembly; DNA packaging; nucleosome assembly; chromosome organization; cellular component assembly; macromolecular complex assembly; organelle organization; chromatin organization; protein complex biogenesis; chromatin assembly; cellular process; protein complex assembly; cellular component organization or biogenesis; protein-DNA complex subunit organization; DNA conformation change; | intracellular organelle; intracellular non-membrane-bounded organelle; cytoskeleton part; intracellular organelle part; macromolecular complex; intracellular part; cell; organelle part; DNA binding complex; chromosomal part; nucleosome; non-membrane-bounded organelle; intracellular membrane-bounded organelle; organelle; nucleus; chromatin; cell part; intracellular; chromosome; membrane-bounded organelle; protein complex; protein-DNA complex; DNA packaging complex;                                                                                                                                                                                                                                                                                                    | organic cyclic compound binding; heterocyclic compound binding; DNA binding; binding; nucleic acid binding;                                                                                                                                                                                                                                                                                                                                                                                                                                                                                                                                                                                                                                                                             | K11275                  |                                                    |                                                        | IPR011991; IPR005818;                                                                                                                                              | Winged helix-turn-helix DNA-binding domain; Linker histone H1H5, domain H15;                                                                                       |
| F1QA12 | -          | Uncharacterized protein (Fragment)                | _LAK(cr)EQAEK_            | 539  | 1 | AEKERLAKEQAEEK  |               | extracellular | membrane;                                                                                                                                                                                                                                                                                                                                                                                                                                                                                                                                                                                                                                                                       |                                                                                                                                                                                                                                                                                                                                                                                                                                                                                                                                                                                                                                                                                                                                                                                         |                                                                                                                                                                                                                                                                                                                                                                                                                                                                                                                                                                                                                                                                                                                                                                                         |                         |                                                    | IPR007943;                                             | Aspartyl beta-hydroxylase/Tridn domain;                                                                                                                            |                                                                                                                                                                    |
| B8A568 | myhz1.1    | Uncharacterized protein                           | _LAQESIMDLENDK(cr)QOSEEK_ | 1075 | 1 | IMDLENDKQOSEEKL | .....DK.....  | nuclear       | intracellular organelle; intracellular non-membrane-bounded organelle; cytoskeleton part; intracellular organelle part; macromolecular complex; intracellular part; cell; actin cytoskeleton; organelle part; non-membrane-bounded organelle; organelle; cytoskeleton; cell part; intracellular; myosin complex; protein complex;                                                                                                                                                                                                                                                                                                                                               | ATP binding; motor activity; nucleoside phosphate binding; nucleoside binding; ion binding; hydrolase activity, acting on acid anhydrides; hydrolase activity; nucleotide binding; nucleoside-triphosphatase activity; organic cyclic compound binding; heterocyclic compound binding; ribonucleoside binding; carbohydrate derivative binding; pyrophosphatase activity; catalytic activity; ribonucleotide binding; binding; purine ribonucleotide binding; anion binding; purine ribonucleotide binding; adenylyl ribonucleotide binding; adenylyl nucleotide binding; purine nucleoside binding; hydrolase activity, acting on acid anhydrides, in phosphorus-containing anhydrides; purine nucleotide binding; small molecule binding; purine ribonucleoside triphosphate binding; | K10352                                                                                                                                                                                                                                                                                                                                                                                                                                                                                                                                                                                                                                                                                                                                                                                  | MYH; myosin heavy chain | dre04530 Tight junction - Danio rerio (zebrafish); | IPR002928; IPR004009; IPR001609; IPR027417; IPR027401; | Myosin tail; Myosin, N-terminal, SH3-like; Myosin head, motor domain; P-loop containing nucleoside triphosphate hydrolase; Myosin-like IQ motif-containing domain; |                                                                                                                                                                    |
| B8A561 | myhz1.2    | Uncharacterized protein                           | _LAQESIMDLENDK(cr)QOSEEK_ | 1075 | 1 | IMDLENDKQOSEEKL | .....DK.....  | nuclear       | intracellular organelle; intracellular non-membrane-bounded organelle; cytoskeleton part; intracellular organelle part; macromolecular complex; intracellular part; cell; actin cytoskeleton; organelle part; non-membrane-bounded organelle; organelle; cytoskeleton; cell part; intracellular; myosin complex; protein complex;                                                                                                                                                                                                                                                                                                                                               | ATP binding; motor activity; nucleoside phosphate binding; nucleoside binding; ion binding; hydrolase activity, acting on acid anhydrides; hydrolase activity; nucleotide binding; nucleoside-triphosphatase activity; organic cyclic compound binding; heterocyclic compound binding; ribonucleoside binding; carbohydrate derivative binding; pyrophosphatase activity; catalytic activity; ribonucleotide binding; binding; purine ribonucleotide binding; anion binding; purine ribonucleotide binding; adenylyl ribonucleotide binding; adenylyl nucleotide binding; purine nucleoside binding; hydrolase activity, acting on acid anhydrides, in phosphorus-containing anhydrides; purine nucleotide binding; small molecule binding; purine ribonucleoside triphosphate binding; | K10352                                                                                                                                                                                                                                                                                                                                                                                                                                                                                                                                                                                                                                                                                                                                                                                  | MYH; myosin heavy chain | dre04530 Tight junction - Danio rerio (zebrafish); | IPR002928; IPR004009; IPR001609; IPR027417; IPR027401; | Myosin tail; Myosin, N-terminal, SH3-like; Myosin head, motor domain; P-loop containing nucleoside triphosphate hydrolase; Myosin-like IQ motif-containing domain; |                                                                                                                                                                    |

|        |        |                                            |                         |      |   |                                   |         |                                                                                                                                                                                                                                                                                                                                                                                                                                                                                                                                                                                                                                                                                                                                                                                                                                                                                                                    |        |                         |                                                                                                                                           |                                                                                                                                                                                                                                                                                                                                                                                                                  |                                                                                                                                                                    |
|--------|--------|--------------------------------------------|-------------------------|------|---|-----------------------------------|---------|--------------------------------------------------------------------------------------------------------------------------------------------------------------------------------------------------------------------------------------------------------------------------------------------------------------------------------------------------------------------------------------------------------------------------------------------------------------------------------------------------------------------------------------------------------------------------------------------------------------------------------------------------------------------------------------------------------------------------------------------------------------------------------------------------------------------------------------------------------------------------------------------------------------------|--------|-------------------------|-------------------------------------------------------------------------------------------------------------------------------------------|------------------------------------------------------------------------------------------------------------------------------------------------------------------------------------------------------------------------------------------------------------------------------------------------------------------------------------------------------------------------------------------------------------------|--------------------------------------------------------------------------------------------------------------------------------------------------------------------|
| P13104 | tpma   | Uncharacterized protein                    | _LATALQK(cr)LEEAEK_     | 112  | 1 | RLATALQKLEEAKEA .....K.E.....     | cytosol | cytoskeleton; organelle; intracellular organelle; intracellular non-membrane-bounded organelle; cell part; intracellular; cytoplasm; intracellular part; cell; non-membrane-bounded organelle;                                                                                                                                                                                                                                                                                                                                                                                                                                                                                                                                                                                                                                                                                                                     | K10373 | TPM1; tropomyosin 1     | dre04260 Carotid muscle contraction - Danio rerio (zebrafish); dre04261 Adrenergic signaling in cardiomyocytes - Danio rerio (zebrafish); |                                                                                                                                                                                                                                                                                                                                                                                                                  |                                                                                                                                                                    |
| Q6P3J5 | eef2b  | Eukaryotic translation elongation factor 2 | _LDIK(cr)LDTEKDK_       | 322  | 1 | LEIKLDIKLDTEKDK .....E.....K..... | cytosol | nucleoside phosphate binding; translation elongation factor activity; hydrolase activity, acting on acid anhydrides; hydrolase activity; organic cyclic compound binding; heterocyclic compound binding; pyrophosphatase activity; catalytic activity; ribonucleoside binding; binding; GTPase activity; purine ribonucleoside binding; anion binding; hydrolase activity, acting on acid anhydrides, in phosphorus-containing anhydrides; guanyl nucleotide binding; GTP binding; purine nucleotide binding; purine ribonucleoside triphosphate binding; RNA binding; ion binding; nucleoside binding; nucleotide binding; nucleoside-triphosphatase activity; ribonucleoside binding; translation factor activity, nucleic acid binding; carbohydrate derivative binding; nucleic acid binding; purine ribonucleoside binding; guanyl ribonucleoside binding; purine nucleoside binding; small molecule binding; | K03234 |                         | IPR027417; IPR000795; IPR005517; IPR003225; IPR004161; IPR000640; IPR020568; IPR014721; IPR009022; IPR009000;                             | P-loop containing nucleoside triphosphate hydrolase; Elongation factor, GTP-binding domain; Translation elongation factor EFG/EF2, domain IV; Small GTP-binding protein domain; Translation elongation factor EFT uEF1A, domain 2; Translation elongation factor EFG, II-V domain; Ribosomal protein S5 domain 2-type fold, subgroup; Elongation factor G, II-V domain; Translation protein, beta-barrel domain; |                                                                                                                                                                    |
| B8A568 | myh2.1 | Uncharacterized protein                    | _LEDEEENAEIETAK(cr)K_   | 941  | 1 | INAEIETAKKRKLEDE                  | nuclear | intracellular organelle; intracellular non-membrane-bounded organelle; cytoskeleton part; intracellular organelle part; macromolecular complex; intracellular part; cell; actin cytoskeleton; organelle part; non-membrane-bounded organelle; organelle; cytoskeleton; cell part; intracellular; myosin complex; protein complex;                                                                                                                                                                                                                                                                                                                                                                                                                                                                                                                                                                                  | K10352 | MYH; myosin heavy chain | dre04530 Tight junction - Danio rerio (zebrafish);                                                                                        | IPR002928; IPR004009; IPR001609; IPR027417; IPR027401;                                                                                                                                                                                                                                                                                                                                                           | Myosin tail; Myosin, N-terminal, SH3-like; Myosin head, motor domain; P-loop containing nucleoside triphosphate hydrolase; Myosin-like IQ motif-containing domain; |
| B8A561 | myh2.2 | Uncharacterized protein                    | _LEDEEENAEIETAK(cr)K_   | 941  | 1 | INAEIETAKKRKLEDE                  | nuclear | intracellular organelle; intracellular non-membrane-bounded organelle; cytoskeleton part; intracellular organelle part; macromolecular complex; intracellular part; cell; actin cytoskeleton; organelle part; non-membrane-bounded organelle; organelle; cytoskeleton; cell part; intracellular; myosin complex; protein complex;                                                                                                                                                                                                                                                                                                                                                                                                                                                                                                                                                                                  | K10352 | MYH; myosin heavy chain | dre04530 Tight junction - Danio rerio (zebrafish);                                                                                        | IPR002928; IPR004009; IPR001609; IPR027417; IPR027401;                                                                                                                                                                                                                                                                                                                                                           | Myosin tail; Myosin, N-terminal, SH3-like; Myosin head, motor domain; P-loop containing nucleoside triphosphate hydrolase; Myosin-like IQ motif-containing domain; |
| P13104 | tpma   | Tropomyosin alpha-1 chain                  | _LEEAEK(cr)AADESER_     | 118  | 1 | QKLEEAKEAADESER                   | cytosol | cytoskeleton; organelle; intracellular organelle; intracellular non-membrane-bounded organelle; cell part; intracellular; cytoplasm; intracellular part; cell; non-membrane-bounded organelle;                                                                                                                                                                                                                                                                                                                                                                                                                                                                                                                                                                                                                                                                                                                     | K10373 | TPM1; tropomyosin 1     | dre04260 Carotid muscle contraction - Danio rerio (zebrafish); dre04261 Adrenergic signaling in cardiomyocytes - Danio rerio (zebrafish); |                                                                                                                                                                                                                                                                                                                                                                                                                  |                                                                                                                                                                    |
| B8A568 | myh2.1 | Uncharacterized protein                    | _LEEAGGATAAQIEMNK(cr)K_ | 1167 | 1 | AAQIEMNKKREAEFQ                   | nuclear | intracellular organelle; intracellular non-membrane-bounded organelle; cytoskeleton part; intracellular organelle part; macromolecular complex; intracellular part; cell; actin cytoskeleton; organelle part; non-membrane-bounded organelle; organelle; cytoskeleton; cell part; intracellular; myosin complex; protein complex;                                                                                                                                                                                                                                                                                                                                                                                                                                                                                                                                                                                  | K10352 | MYH; myosin heavy chain | dre04530 Tight junction - Danio rerio (zebrafish);                                                                                        | IPR002928; IPR004009; IPR001609; IPR027417; IPR027401;                                                                                                                                                                                                                                                                                                                                                           | Myosin tail; Myosin, N-terminal, SH3-like; Myosin head, motor domain; P-loop containing nucleoside triphosphate hydrolase; Myosin-like IQ motif-containing domain; |
| B8A561 | myh2.2 | Uncharacterized protein                    | _LEEAGGATAAQIEMNK(cr)K_ | 1167 | 1 | AAQIEMNKKREAEFQ                   | nuclear | intracellular organelle; intracellular non-membrane-bounded organelle; cytoskeleton part; intracellular organelle part; macromolecular complex; intracellular part; cell; actin cytoskeleton; organelle part; non-membrane-bounded organelle; organelle; cytoskeleton; cell part; intracellular; myosin complex; protein complex;                                                                                                                                                                                                                                                                                                                                                                                                                                                                                                                                                                                  | K10352 | MYH; myosin heavy chain | dre04530 Tight junction - Danio rerio (zebrafish);                                                                                        | IPR002928; IPR004009; IPR001609; IPR027417; IPR027401;                                                                                                                                                                                                                                                                                                                                                           | Myosin tail; Myosin, N-terminal, SH3-like; Myosin head, motor domain; P-loop containing nucleoside triphosphate hydrolase; Myosin-like IQ motif-containing domain; |

|        |            |                           |                         |      |   |                              |         |                                                                                                                                                                                                                                                                                                                                                                                                                                                                                                                                                                                                                                                                                                                                                                                                                                                                                                                                                                                                                                                                             |                                                                                                                                                                                                                                                                                                                                                                                                                                                                                                                                                                                                                                                                                                                                                                |                                                                   |                         |                                                                                                                                                                                                                                                                            |                                                                                                                                                                       |                                                                                                                                                                    |
|--------|------------|---------------------------|-------------------------|------|---|------------------------------|---------|-----------------------------------------------------------------------------------------------------------------------------------------------------------------------------------------------------------------------------------------------------------------------------------------------------------------------------------------------------------------------------------------------------------------------------------------------------------------------------------------------------------------------------------------------------------------------------------------------------------------------------------------------------------------------------------------------------------------------------------------------------------------------------------------------------------------------------------------------------------------------------------------------------------------------------------------------------------------------------------------------------------------------------------------------------------------------------|----------------------------------------------------------------------------------------------------------------------------------------------------------------------------------------------------------------------------------------------------------------------------------------------------------------------------------------------------------------------------------------------------------------------------------------------------------------------------------------------------------------------------------------------------------------------------------------------------------------------------------------------------------------------------------------------------------------------------------------------------------------|-------------------------------------------------------------------|-------------------------|----------------------------------------------------------------------------------------------------------------------------------------------------------------------------------------------------------------------------------------------------------------------------|-----------------------------------------------------------------------------------------------------------------------------------------------------------------------|--------------------------------------------------------------------------------------------------------------------------------------------------------------------|
| Q7ZU4  | zgc:56493  | Thioredoxin               | _LEEMVK(cr)QHK_         | 104  | 1 | TKLEEMVKQHKN_                | cytosol | regulation of cellular process; regulation of biological quality; small molecule metabolic process; cell redox homeostasis; single-organism cellular process; ether metabolic process; cellular homeostasis; single-organism process; organic substance metabolic process; homeostatic process; metabolic process; regulation of biological process; single-organism metabolic process; glycerol ether metabolic process; cellular process; biological regulation;                                                                                                                                                                                                                                                                                                                                                                                                                                                                                                                                                                                                          | protein disulfide oxidoreductase activity; oxidoreductase activity, acting on a sulfur group of donors; disulfide oxidoreductase activity; electron carrier activity; catalytic activity; oxidoreductase activity;                                                                                                                                                                                                                                                                                                                                                                                                                                                                                                                                             | K03671                                                            | IPR012336; IPR013766;   | Thioredoxin-like fold; Thioredoxin domain;                                                                                                                                                                                                                                 |                                                                                                                                                                       |                                                                                                                                                                    |
| F1QK60 | kt4        | Uncharacterized protein   | _LEGELK(cr)NMQGLVEDFK_  | 189  | 1 | MKLEGELKNMQLGVE              | nuclear | intracellular organelle; intracellular non-membrane-bounded organelle; cytoskeletal part; intracellular organelle part; macromolecular complex; intracellular part; cell; keratin filament; organelle part; non-membrane-bounded organelle; organelle; cytoskeleton; intermediate filament cytoskeleton; cell part; intracellular; intermediate filament; protein complex;                                                                                                                                                                                                                                                                                                                                                                                                                                                                                                                                                                                                                                                                                                  | structural molecule activity;                                                                                                                                                                                                                                                                                                                                                                                                                                                                                                                                                                                                                                                                                                                                  | K07605                                                            |                         |                                                                                                                                                                                                                                                                            |                                                                                                                                                                       |                                                                                                                                                                    |
| Q29RA2 | zgc:136908 | Uncharacterized protein   | _LEIQHTK(cr)NMK_        | 388  | 1 | EIQHTKNMKLSED                | cytosol |                                                                                                                                                                                                                                                                                                                                                                                                                                                                                                                                                                                                                                                                                                                                                                                                                                                                                                                                                                                                                                                                             | ATP binding; nucleoside phosphate binding; nucleoside binding; ion binding; hydrolase activity, acting on acid anhydrides; hydrolase activity; nucleotide binding; nucleoside-triphosphatase activity; organic cyclic compound binding; heterocyclic compound binding; ribonucleoside binding; carbohydrate derivative binding; pyrophosphatase activity; catalytic activity; ribonucleotide binding; purine ribonucleoside binding; anion binding; purine ribonucleotide binding; adenylyl ribonucleotide binding; adenylyl nucleotide binding; purine nucleoside binding; hydrolase activity, acting on acid anhydrides, in phosphorus-containing anhydrides; purine nucleotide binding; small molecule binding; purine ribonucleoside triphosphate binding; |                                                                   |                         | CDC48 domain 2-like; ATPase, AAA-type, core; AAA+ ATPase IPR029067; domain; Aspartate IPR003959; decarboxylase-like IPR003553; domain; CDC48, domain 2; P-loop IPR004201; containing IPR027417; nucleoside triphosphate IPR003338; hydrolase; CDC48, N-terminal subdomain; |                                                                                                                                                                       |                                                                                                                                                                    |
| P13104 | tpma       | Tropomyosin alpha-1 chain | _LEK(cr)TIDDELYAOK_     | 251  | 1 | RSVAKLEKTIDDED .....K.L..... | cytosol | cytoskeleton; organelle; intracellular organelle; intracellular non-membrane-bounded organelle; cell part; intracellular; cytoplasm; intracellular part; cell; non-membrane-bounded organelle;                                                                                                                                                                                                                                                                                                                                                                                                                                                                                                                                                                                                                                                                                                                                                                                                                                                                              |                                                                                                                                                                                                                                                                                                                                                                                                                                                                                                                                                                                                                                                                                                                                                                | K10373                                                            | TPM1; tropomyosin 1     | dre04260 Carotid muscle contraction - Danio rerio (zebrafish); dre04261 Adrenergic signaling in cardiomyocytes - Danio rerio (zebrafish);                                                                                                                                  |                                                                                                                                                                       |                                                                                                                                                                    |
| E7FBZ3 | zgc:171719 | Uncharacterized protein   | LEK(cr)TIDDELEK         | 251  | 1 | RSVAKLEKTIDDEE .....K.L..... | cytosol |                                                                                                                                                                                                                                                                                                                                                                                                                                                                                                                                                                                                                                                                                                                                                                                                                                                                                                                                                                                                                                                                             |                                                                                                                                                                                                                                                                                                                                                                                                                                                                                                                                                                                                                                                                                                                                                                |                                                                   |                         |                                                                                                                                                                                                                                                                            |                                                                                                                                                                       |                                                                                                                                                                    |
| B8A568 | myh2.1     | Uncharacterized protein   | _LEQQVDDLEGSLEQEK(cr)K_ | 1044 | 1 | EGSLEQEKLRMDLE .....K.L..... | nuclear | intracellular organelle; intracellular non-membrane-bounded organelle; cytoskeletal part; intracellular organelle part; macromolecular complex; intracellular part; cell; actin cytoskeleton; organelle part; non-membrane-bounded organelle; organelle; cytoskeleton; cell part; intracellular; myosin complex; protein complex;                                                                                                                                                                                                                                                                                                                                                                                                                                                                                                                                                                                                                                                                                                                                           | ATP binding; motor activity; nucleoside phosphate binding; nucleoside binding; ion binding; hydrolase activity, acting on acid anhydrides; hydrolase activity; nucleotide binding; nucleoside-triphosphatase activity; organic cyclic compound binding; heterocyclic compound binding; pyrophosphatase activity; catalytic activity; ribonucleotide binding; purine ribonucleoside binding; anion binding; purine ribonucleotide binding; adenylyl ribonucleotide binding; adenylyl nucleotide binding; purine nucleoside binding; hydrolase activity, acting on acid anhydrides, in phosphorus-containing anhydrides; purine nucleotide binding; small molecule binding; purine ribonucleoside triphosphate binding;                                          | K10352                                                            | MYH; myosin heavy chain | dre04530 Tight junction - Danio rerio (zebrafish);                                                                                                                                                                                                                         | IPR002928; IPR004009; IPR001609; IPR027417; IPR027401;                                                                                                                | Myosin tail; Myosin, N-terminal, SH3-like; Myosin head, motor domain, P-loop containing nucleoside triphosphate hydrolase; Myosin-like IQ motif-containing domain; |
| B8A561 | myh2.2     | Uncharacterized protein   | _LEQQVDDLEGSLEQEK(cr)K_ | 1044 | 1 | EGSLEQEKLRMDLE .....K.L..... | nuclear | intracellular organelle; intracellular non-membrane-bounded organelle; cytoskeletal part; intracellular organelle part; macromolecular complex; intracellular part; cell; actin cytoskeleton; organelle part; non-membrane-bounded organelle; organelle; cytoskeleton; cell part; intracellular; myosin complex; protein complex;                                                                                                                                                                                                                                                                                                                                                                                                                                                                                                                                                                                                                                                                                                                                           | ATP binding; motor activity; nucleoside phosphate binding; nucleoside binding; ion binding; hydrolase activity, acting on acid anhydrides; hydrolase activity; nucleotide binding; nucleoside-triphosphatase activity; organic cyclic compound binding; heterocyclic compound binding; pyrophosphatase activity; catalytic activity; ribonucleotide binding; purine ribonucleoside binding; anion binding; purine ribonucleotide binding; adenylyl ribonucleotide binding; adenylyl nucleotide binding; purine nucleoside binding; hydrolase activity, acting on acid anhydrides, in phosphorus-containing anhydrides; purine nucleotide binding; small molecule binding; purine ribonucleoside triphosphate binding;                                          | K10352                                                            | MYH; myosin heavy chain | dre04530 Tight junction - Danio rerio (zebrafish);                                                                                                                                                                                                                         | IPR002928; IPR004009; IPR001609; IPR027417; IPR027401;                                                                                                                | Myosin tail; Myosin, N-terminal, SH3-like; Myosin head, motor domain, P-loop containing nucleoside triphosphate hydrolase; Myosin-like IQ motif-containing domain; |
| Q6DHL6 | rps6       | 40S ribosomal protein S6  | _LFNLK(cr)EDDV_R_       | 149  | 1 | RKLFNLKEDDVROY               | cytosol | cellular component biogenesis; ribonucleoprotein complex biogenesis; cellular aromatic compound metabolic process; cellular protein metabolic process; biosynthetic process; cellular metabolic process; organic substance metabolic process; metabolic process; heterocycle metabolic process; nucleobase-containing compound metabolic process; rRNA processing; cellular nitrogen compound metabolic process; protein metabolic process; macromolecule metabolic process; translation; macromolecule biosynthetic process; cellular process; ncRNA processing; rRNA metabolic process; ribosomal small subunit biogenesis; ribosome biogenesis; organic cyclic compound metabolic process; nitrogen compound metabolic process; primary metabolic process; organic substance biosynthetic process; cellular biosynthetic process; RNA metabolic process; nucleic acid metabolic process; cellular macromolecule biosynthetic process; cellular macromolecule metabolic process; gene expression; ncRNA metabolic process; cellular component organization or biogenesis; | intracellular organelle; ribosome; intracellular non-membrane-bounded organelle; small ribosomal subunit; cytoplasm; intracellular organelle part; macromolecular complex; intracellular part; cell; cytosol; organelle part; non-membrane-bounded organelle; organelle; intracellular; ribosomal subunit; cell part; cytosolic part; ribonucleoprotein complex; cytosolic small ribosomal subunit; cytoplasmic part; cytosolic ribosome;                                                                                                                                                                                                                                                                                                                      | structural constituent of ribosome; structural molecule activity; | K02991                  | RP-S6; small subunit ribosomal protein S6                                                                                                                                                                                                                                  | dre04910 Insulin signaling pathway - Danio rerio (zebrafish); dre03010 Ribosome - Danio rerio (zebrafish); dre04150 mTOR signaling pathway - Danio rerio (zebrafish); |                                                                                                                                                                    |

|        |          |                                             |                        |     |   |                   |               |                   |                                                                                                                                                                                                                                                                                                                                                                                                                                                                                                                                                                                                                                                                                                                                                                                                                                                                                                                                                                                                                                                                                                                                                                                                                                       |                                                                                                                                                                                                                                                                                                                                                                                                                                                                                                                                                                                                                                                                                                                                                                                                                                                                                                                                                                                                                                                                                                                                                                                                                                                                                                                                                                                                                                                                                                                                                                                                                                                                                                                                                                                                                                                                                                                                                                         |                                                      |                                                                                                                                               |                                                                                                                                                                                                                                                                                                                                                                                                                                                                                                                                                                                                                                                                                                                                                                                                                                             |                                                                                                                                                                                                                                                                                            |                                                                           |
|--------|----------|---------------------------------------------|------------------------|-----|---|-------------------|---------------|-------------------|---------------------------------------------------------------------------------------------------------------------------------------------------------------------------------------------------------------------------------------------------------------------------------------------------------------------------------------------------------------------------------------------------------------------------------------------------------------------------------------------------------------------------------------------------------------------------------------------------------------------------------------------------------------------------------------------------------------------------------------------------------------------------------------------------------------------------------------------------------------------------------------------------------------------------------------------------------------------------------------------------------------------------------------------------------------------------------------------------------------------------------------------------------------------------------------------------------------------------------------|-------------------------------------------------------------------------------------------------------------------------------------------------------------------------------------------------------------------------------------------------------------------------------------------------------------------------------------------------------------------------------------------------------------------------------------------------------------------------------------------------------------------------------------------------------------------------------------------------------------------------------------------------------------------------------------------------------------------------------------------------------------------------------------------------------------------------------------------------------------------------------------------------------------------------------------------------------------------------------------------------------------------------------------------------------------------------------------------------------------------------------------------------------------------------------------------------------------------------------------------------------------------------------------------------------------------------------------------------------------------------------------------------------------------------------------------------------------------------------------------------------------------------------------------------------------------------------------------------------------------------------------------------------------------------------------------------------------------------------------------------------------------------------------------------------------------------------------------------------------------------------------------------------------------------------------------------------------------------|------------------------------------------------------|-----------------------------------------------------------------------------------------------------------------------------------------------|---------------------------------------------------------------------------------------------------------------------------------------------------------------------------------------------------------------------------------------------------------------------------------------------------------------------------------------------------------------------------------------------------------------------------------------------------------------------------------------------------------------------------------------------------------------------------------------------------------------------------------------------------------------------------------------------------------------------------------------------------------------------------------------------------------------------------------------------|--------------------------------------------------------------------------------------------------------------------------------------------------------------------------------------------------------------------------------------------------------------------------------------------|---------------------------------------------------------------------------|
| F1QXV8 | pgk1     | Phosphoglycerate kinase                     | _LHLDK(cr)VVK_         | 11  | 1 | SNKHLDKVDVKGKR    | .....DK.....  | cytosol           | single-organism carbohydrate catabolic process; glycolytic process; single-organism catabolic process; small molecule metabolic process; single-organism cellular process; single-organism process; carbohydrate metabolic process; primary metabolic process; cellular metabolic process; organic substance metabolic process; carbohydrate catabolic process; single-organism carbohydrate metabolic process; organic substance catabolic process; metabolic process; pyruvate metabolic process; generation of precursor metabolites and energy; single-organism metabolic process; carboxylic acid metabolic process; monocarboxylic acid metabolic process; organic acid metabolic process; cellular process; catabolic process; oxoacid metabolic process;                                                                                                                                                                                                                                                                                                                                                                                                                                                                      | phosphotransferase activity, carboxyl group as acceptor; kinase activity; catalytic activity; transferase activity; phosphoglycerate kinase activity; transferase activity, transferring phosphorus-containing groups;                                                                                                                                                                                                                                                                                                                                                                                                                                                                                                                                                                                                                                                                                                                                                                                                                                                                                                                                                                                                                                                                                                                                                                                                                                                                                                                                                                                                                                                                                                                                                                                                                                                                                                                                                  | K00827                                               | PGK; phosphoglycerate kinase [EC:2.7.2.3]                                                                                                     | dre00010 Glycolysis / Gluconeogenesis - Danio rerio (zebrafish); dre01230 Biosynthesis of amino acids - Danio rerio (zebrafish); dre01200 Carbon metabolism - Danio rerio (zebrafish); dre01100 Metabolic pathways - Danio rerio (zebrafish);                                                                                                                                                                                                                                                                                                                                                                                                                                                                                                                                                                                               | IPR015624; IPR015901;                                                                                                                                                                                                                                                                      | Phosphoglycerate kinase, N-terminal; Phosphoglycerate kinase, C-terminal; |
| Q0D2W2 | tnni2a-4 | Fast muscle troponin I                      | LHQQIDK(cr)VDEER       | 70  | 1 | KLHQQIDKVDDEERYD  | .....DK.....  | mitochondria      |                                                                                                                                                                                                                                                                                                                                                                                                                                                                                                                                                                                                                                                                                                                                                                                                                                                                                                                                                                                                                                                                                                                                                                                                                                       | organic cyclic compound binding; heterocyclic compound binding; nucleoside phosphate binding; binding; nucleic acid binding; nucleotide binding; small molecule binding;                                                                                                                                                                                                                                                                                                                                                                                                                                                                                                                                                                                                                                                                                                                                                                                                                                                                                                                                                                                                                                                                                                                                                                                                                                                                                                                                                                                                                                                                                                                                                                                                                                                                                                                                                                                                |                                                      |                                                                                                                                               | IPR000504; IPR012677;                                                                                                                                                                                                                                                                                                                                                                                                                                                                                                                                                                                                                                                                                                                                                                                                                       | rRNA recognition motif domain; Nucleoside-binding, alpha-                                                                                                                                                                                                                                  |                                                                           |
| Q6NXC1 | rbm4.3   | Uncharacterized protein                     | _LHVANVEK(cr)GTDDELRL_ | 87  | 1 | LHVANVEKGTDDDELRL |               | cytosol           |                                                                                                                                                                                                                                                                                                                                                                                                                                                                                                                                                                                                                                                                                                                                                                                                                                                                                                                                                                                                                                                                                                                                                                                                                                       |                                                                                                                                                                                                                                                                                                                                                                                                                                                                                                                                                                                                                                                                                                                                                                                                                                                                                                                                                                                                                                                                                                                                                                                                                                                                                                                                                                                                                                                                                                                                                                                                                                                                                                                                                                                                                                                                                                                                                                         |                                                      |                                                                                                                                               | IPR028971; IPR000626;                                                                                                                                                                                                                                                                                                                                                                                                                                                                                                                                                                                                                                                                                                                                                                                                                       | Ubiquitin-related domain; Ubiquitin-like;                                                                                                                                                                                                                                                  |                                                                           |
| B0R193 | ubb      | Uncharacterized protein                     | _LIFAGK(cr)QLEDGR_     | 48  | 1 | ORLIFAGKQLEDGR    | .....K.L..... | cytosol,nucleolus |                                                                                                                                                                                                                                                                                                                                                                                                                                                                                                                                                                                                                                                                                                                                                                                                                                                                                                                                                                                                                                                                                                                                                                                                                                       |                                                                                                                                                                                                                                                                                                                                                                                                                                                                                                                                                                                                                                                                                                                                                                                                                                                                                                                                                                                                                                                                                                                                                                                                                                                                                                                                                                                                                                                                                                                                                                                                                                                                                                                                                                                                                                                                                                                                                                         |                                                      |                                                                                                                                               |                                                                                                                                                                                                                                                                                                                                                                                                                                                                                                                                                                                                                                                                                                                                                                                                                                             |                                                                                                                                                                                                                                                                                            |                                                                           |
| Q08BA1 | atp5a1   | ATP synthase subunit alpha                  | _LIK(cr)EGDIVK_        | 125 | 1 | FGNDKLIKEGDIVK    |               | mitochondria      | nucleoside metabolic process; purine nucleoside metabolic process; purine ribonucleoside monophosphate metabolic process; nucleotide metabolic process; energy coupled proton transmembrane transport, against electrochemical gradient; single-organism process; biosynthetic process; nucleoside biosynthetic process; purine ribonucleoside biosynthetic process; ribonucleoside monophosphate biosynthetic process; cellular metabolic process; phosphate-containing compound metabolic process; establishment of localization; ribose phosphate biosynthetic process; metabolic process; carbohydrate derivative biosynthetic process; nucleoside phosphate metabolic process; ribose phosphate metabolic process; purine nucleoside triphosphate biosynthetic process; single-organism transport; heterocycle biosynthetic process; purine ribonucleoside triphosphate biosynthetic process; cation transmembrane transport; small molecule metabolic process; ATP biosynthetic process; single-organism cellular process; purine-containing compound metabolic process; organic cyclic compound metabolic process; purine ribonucleoside triphosphate metabolic process; energy coupled proton transport, down electrochemical | ATPase activity, coupled to transmembrane movement of ions; nucleoside phosphate binding; primary active transmembrane transporter activity; substrate-specific transporter activity; hydrolase activity, acting on acid anhydrides; ATPase activity, coupled to transmembrane movement of ions, rotational mechanism; monovalent inorganic cation transmembrane transporter activity; hydrolase activity; hydrogen ion transmembrane transporter activity; substrate-specific transmembrane transporter activity; proton-transporting ATP synthase activity, rotational mechanism; ATPase activity; organic cyclic compound binding; heterocyclic compound binding; cation-transporting ATPase activity; pyrophosphatase activity; catalytic activity; ribonucleotide binding; ATPase activity, coupled to movement of substances; binding; purine ribonucleoside binding; hydrogen-exporting ATPase activity; hydrolase activity, acting on acid anhydrides, catalyzing transmembrane movement of substances; anion binding; adenyl ribonucleotide binding; adenyl nucleotide binding; inorganic cation transmembrane transporter activity; hydrolase activity, acting on acid anhydrides, in phosphorus-containing anhydrides; transporter activity; purine nucleotide binding; purine ribonucleoside triphosphate binding; active transmembrane transporter activity; ATP binding; ion transmembrane transporter activity; ion binding; nucleoside binding; nucleotide binding; nucleoside-triphosphatase activity; proton-transporting ATPase activity, rotational mechanism; ribonucleoside binding; P-P-bond-hydrolysis-driven transmembrane transporter activity; carbohydrate derivative binding; ATPase activity, coupled to transmembrane movement of substances; ATPase activity, coupled; purine ribonucleotide binding; purine nucleoside binding; cation transmembrane transporter activity; transmembrane transporter activity; small molecule binding; | ATP5F1A; F-type H+-transporting ATPase subunit alpha | dre01100 Metabolic pathways - Danio rerio (zebrafish); dre00190 Oxidative phosphorylation - Danio rerio (zebrafish);                          | IPR000793; IPR004100; IPR000194; IPR027417; IPR029386;                                                                                                                                                                                                                                                                                                                                                                                                                                                                                                                                                                                                                                                                                                                                                                                      | ATPase, F1/VI/A1 complex, alpha/beta subunit, C-terminal; ATPase, F1 complex, alpha/beta subunit, N-terminal domain; ATPase, F1/VI/A1 complex, alpha/beta subunit, nucleotide-binding domain; P-loop containing nucleoside triphosphate hydrolase; ATP synthase subunit alpha-like domain; |                                                                           |
| P13104 | tpma     | Tropomyosin alpha-1 chain                   | _LK(cr)ATEDELDK_       | 51  | 1 | VALQKKLKAATEDELD  |               | cytosol           | cytoskeleton; organelle; intracellular organelle; intracellular non-membrane-bounded organelle; cell part; intracellular; cytoplasm; intracellular part; cell; non-membrane-bounded organelle;                                                                                                                                                                                                                                                                                                                                                                                                                                                                                                                                                                                                                                                                                                                                                                                                                                                                                                                                                                                                                                        |                                                                                                                                                                                                                                                                                                                                                                                                                                                                                                                                                                                                                                                                                                                                                                                                                                                                                                                                                                                                                                                                                                                                                                                                                                                                                                                                                                                                                                                                                                                                                                                                                                                                                                                                                                                                                                                                                                                                                                         | K10373                                               | dre00260 Contractile muscle contraction - Danio rerio (zebrafish); dre04261 Adrenergic signaling in cardiomyocytes - Danio rerio (zebrafish); | TPM1; tropomyosin 1                                                                                                                                                                                                                                                                                                                                                                                                                                                                                                                                                                                                                                                                                                                                                                                                                         |                                                                                                                                                                                                                                                                                            |                                                                           |
| P13104 | tpma     | Tropomyosin alpha-1 chain                   | _LK(cr)ATEDELDKYSEALK_ | 51  | 1 | VALQKKLKAATEDELD  |               | cytosol           | cytoskeleton; organelle; intracellular organelle; intracellular non-membrane-bounded organelle; cell part; intracellular; cytoplasm; intracellular part; cell; non-membrane-bounded organelle;                                                                                                                                                                                                                                                                                                                                                                                                                                                                                                                                                                                                                                                                                                                                                                                                                                                                                                                                                                                                                                        |                                                                                                                                                                                                                                                                                                                                                                                                                                                                                                                                                                                                                                                                                                                                                                                                                                                                                                                                                                                                                                                                                                                                                                                                                                                                                                                                                                                                                                                                                                                                                                                                                                                                                                                                                                                                                                                                                                                                                                         | K10373                                               | dre00260 Contractile muscle contraction - Danio rerio (zebrafish); dre04261 Adrenergic signaling in cardiomyocytes - Danio rerio (zebrafish); | TPM1; tropomyosin 1                                                                                                                                                                                                                                                                                                                                                                                                                                                                                                                                                                                                                                                                                                                                                                                                                         |                                                                                                                                                                                                                                                                                            |                                                                           |
| Q6AZA0 | acaf1    | Acetyl-CoA acetyltransferase, mitochondrial | _LK(cr)AVFLK_          | 261 | 1 | FSKVPKLVAVFLKEN   | .....K.V..... | mitochondria      | organelle; intracellular membrane-bounded organelle; intracellular organelle; cell part; intracellular; cytoplasm; intracellular part; membrane-bounded organelle; cell; mitochondrion; cytoplasmic part;                                                                                                                                                                                                                                                                                                                                                                                                                                                                                                                                                                                                                                                                                                                                                                                                                                                                                                                                                                                                                             | transferase activity, transferring acyl groups; catalytic activity; binding; ion binding; metal ion binding; cation binding; acetyl-CoA C-acetyltransferase activity; C-acetyltransferase activity; acetyl-CoA C-acetyltransferase activity; transferase activity; transferase activity, transferring acyl groups other than amino-acyl groups; acetyltransferase activity; C-acetyltransferase activity;                                                                                                                                                                                                                                                                                                                                                                                                                                                                                                                                                                                                                                                                                                                                                                                                                                                                                                                                                                                                                                                                                                                                                                                                                                                                                                                                                                                                                                                                                                                                                               | K00626                                               | E2.3.1.9: acetyl-CoA C-acyltransferase [EC:2.3.1.9]                                                                                           | dre01200 Carbon metabolism - Danio rerio (zebrafish); dre00900 Terpenoid backbone biosynthesis - Danio rerio (zebrafish); dre01212 Fatty acid metabolism - Danio rerio (zebrafish); dre00630 Glyoxylate and dicarboxylate metabolism - Danio rerio (zebrafish); dre00280 Valine, leucine and isoleucine degradation - Danio rerio (zebrafish); dre00640 Propanoate metabolism - Danio rerio (zebrafish); dre01100 Metabolic pathways - Danio rerio (zebrafish); dre00310 Lysine degradation - Danio rerio (zebrafish); dre00620 Pyruvate metabolism - Danio rerio (zebrafish); dre00072 Synthesis and degradation of ketone bodies - Danio rerio (zebrafish); dre00380 Tryptophan metabolism - Danio rerio (zebrafish); dre00071 Fatty acid degradation - Danio rerio (zebrafish); dre00650 Butanoate metabolism - Danio rerio (zebrafish); | IPR016039; IPR020616; IPR020617;                                                                                                                                                                                                                                                           | Thiolase-like; Thiolase, N-terminal; Thiolase, C-terminal;                |



|        |         |                                                     |                            |     |   |                 |               |                 |                                                                                                                                                                                                                                                                                                                                                                                                                                                                                                                                                                                                                                                                                                                                                                                                                                                                                                                                                                                                                                                                                                                                                                                                                                                                   |                                                                                                                                                                                                                                                                                                                                                                                                                                                                                                                                                                                                                                                                                                                                                                                         |                                                                                                                                                                                                                                                                                                                                                                                                                                                                                                                                                                                                                                                                                                                                                                                         |                                               |                                                                                                                                                                            |                                                        |                                                                                                                                                                    |                                                                                                                                                                    |
|--------|---------|-----------------------------------------------------|----------------------------|-----|---|-----------------|---------------|-----------------|-------------------------------------------------------------------------------------------------------------------------------------------------------------------------------------------------------------------------------------------------------------------------------------------------------------------------------------------------------------------------------------------------------------------------------------------------------------------------------------------------------------------------------------------------------------------------------------------------------------------------------------------------------------------------------------------------------------------------------------------------------------------------------------------------------------------------------------------------------------------------------------------------------------------------------------------------------------------------------------------------------------------------------------------------------------------------------------------------------------------------------------------------------------------------------------------------------------------------------------------------------------------|-----------------------------------------------------------------------------------------------------------------------------------------------------------------------------------------------------------------------------------------------------------------------------------------------------------------------------------------------------------------------------------------------------------------------------------------------------------------------------------------------------------------------------------------------------------------------------------------------------------------------------------------------------------------------------------------------------------------------------------------------------------------------------------------|-----------------------------------------------------------------------------------------------------------------------------------------------------------------------------------------------------------------------------------------------------------------------------------------------------------------------------------------------------------------------------------------------------------------------------------------------------------------------------------------------------------------------------------------------------------------------------------------------------------------------------------------------------------------------------------------------------------------------------------------------------------------------------------------|-----------------------------------------------|----------------------------------------------------------------------------------------------------------------------------------------------------------------------------|--------------------------------------------------------|--------------------------------------------------------------------------------------------------------------------------------------------------------------------|--------------------------------------------------------------------------------------------------------------------------------------------------------------------|
| E9QIC9 | lmb1    | Uncharacterized protein                             | _LK(cr)DVEALLNAK_          | 137 | 1 | TSSQNRKLDVEALLN | .....K.V..... | mitochondria    | intracellular organelle; intracellular non-membrane-bounded organelle; cytoskeletal part; intracellular organelle part; macromolecular complex; intracellular part; cell; organelle part; non-membrane-bounded organelle; organelle; cytoskeleton; intermediate filament cytoskeleton; cell part; intracellular; intermediate filament; protein complex;                                                                                                                                                                                                                                                                                                                                                                                                                                                                                                                                                                                                                                                                                                                                                                                                                                                                                                          | structural molecule activity;                                                                                                                                                                                                                                                                                                                                                                                                                                                                                                                                                                                                                                                                                                                                                           |                                                                                                                                                                                                                                                                                                                                                                                                                                                                                                                                                                                                                                                                                                                                                                                         |                                               |                                                                                                                                                                            |                                                        |                                                                                                                                                                    |                                                                                                                                                                    |
| F1QIR4 | -       | Uncharacterized protein                             | _LK(cr)EAYAK_              | 863 | 1 | KEEFTKLKEAYAKSE | .E.....K..... | cytosol         | cellular component biogenesis; muscle cell development; single-multicellular organism process; cellular component organization; muscle system process; cellular developmental process; cellular component morphogenesis; single-organism process; actin filament organization; cell development; anatomical structure morphogenesis; cell differentiation; actin cytoskeleton organization; muscle contraction; cellular component assembly; organelle assembly; macromolecular complex assembly; myofibril assembly; musculoskeletal movement; slow-twitch skeletal muscle fiber contraction; muscle structure development; cytoskeleton organization; anatomical structure formation involved in morphogenesis; cellular process; striated muscle myosin thick filament assembly; protein complex assembly; cellular protein complex assembly; skeletal muscle thin filament assembly; developmental process; cellular macromolecular complex assembly; striated muscle cell differentiation; actomyosin structure organization; system process; protein complex subunit organization; multicellular organismal movement; single-organism cellular process; cellular component assembly involved in morphogenesis; striated muscle contraction; myosin filament | intracellular organelle; intracellular non-membrane-bounded organelle; cytoskeletal part; intracellular organelle part; macromolecular complex; intracellular part; cell; actin cytoskeleton; organelle part; non-membrane-bounded organelle; organelle; cytoskeleton; cell part; intracellular; myosin complex; protein complex;                                                                                                                                                                                                                                                                                                                                                                                                                                                       | ATP binding; motor activity; nucleoside phosphate binding; nucleoside binding; ion binding; hydrolase activity, acting on acid anhydrides; hydrolase activity; nucleotide binding; nucleoside-triphosphatase activity; organic cyclic compound binding; heterocyclic compound binding; ribonucleoside binding; carbohydrate derivative binding; pyrophosphatase activity; catalytic activity; ribonucleoside binding; binding; purine ribonucleoside binding; anion binding; purine ribonucleoside binding; adenylyl ribonucleoside binding; adenylyl nucleotide binding; purine nucleoside binding; hydrolase activity, acting on acid anhydrides, in phosphorus-containing anhydrides; purine nucleotide binding; small molecule binding; purine ribonucleoside triphosphate binding; | K10352                                        | MYH; myosin heavy chain                                                                                                                                                    | dre04530 Tight junction - Danio rerio (zebrafish);     | IPR002928; IPR004009; IPR027417; IPR001609; IPR027401;                                                                                                             | Myosin tail; Myosin, N-terminal, SH3-like; P-loop containing nucleoside triphosphate hydrolase; Myosin head, motor domain; Myosin-like IQ motif-containing domain; |
| B8A568 | myh2.1  | Uncharacterized protein                             | _LK(cr)ETTERLEDEEENAEIATK_ | 922 | 1 | IQLEAKLKETTERLE |               | nuclear         | intracellular organelle; intracellular non-membrane-bounded organelle; cytoskeletal part; intracellular organelle part; macromolecular complex; intracellular part; cell; actin cytoskeleton; organelle part; non-membrane-bounded organelle; organelle; cytoskeleton; cell part; intracellular; myosin complex; protein complex;                                                                                                                                                                                                                                                                                                                                                                                                                                                                                                                                                                                                                                                                                                                                                                                                                                                                                                                                 | ATP binding; motor activity; nucleoside phosphate binding; nucleoside binding; ion binding; hydrolase activity, acting on acid anhydrides; hydrolase activity; nucleotide binding; nucleoside-triphosphatase activity; organic cyclic compound binding; heterocyclic compound binding; ribonucleoside binding; carbohydrate derivative binding; pyrophosphatase activity; catalytic activity; ribonucleoside binding; binding; purine ribonucleoside binding; anion binding; purine ribonucleoside binding; adenylyl ribonucleoside binding; adenylyl nucleotide binding; purine nucleoside binding; hydrolase activity, acting on acid anhydrides, in phosphorus-containing anhydrides; purine nucleotide binding; small molecule binding; purine ribonucleoside triphosphate binding; | K10352                                                                                                                                                                                                                                                                                                                                                                                                                                                                                                                                                                                                                                                                                                                                                                                  | MYH; myosin heavy chain                       | dre04530 Tight junction - Danio rerio (zebrafish);                                                                                                                         | IPR002928; IPR004009; IPR001609; IPR027417; IPR027401; | Myosin tail; Myosin, N-terminal, SH3-like; Myosin head, motor domain; P-loop containing nucleoside triphosphate hydrolase; Myosin-like IQ motif-containing domain; |                                                                                                                                                                    |
| O93409 | myt1fa  | Uncharacterized protein                             | _LK(cr)GADPEDVIVSAFK_      | 93  | 1 | TMFGEKLGADPEDV  |               | cytosol,nuclear |                                                                                                                                                                                                                                                                                                                                                                                                                                                                                                                                                                                                                                                                                                                                                                                                                                                                                                                                                                                                                                                                                                                                                                                                                                                                   | cation binding; metal ion binding; calcium ion binding; binding; ion binding;                                                                                                                                                                                                                                                                                                                                                                                                                                                                                                                                                                                                                                                                                                           | K12758                                                                                                                                                                                                                                                                                                                                                                                                                                                                                                                                                                                                                                                                                                                                                                                  | MYLFP; fast skeletal myosin light chain 2     | dre04510 Focal adhesion - Danio rerio (zebrafish); dre04530 Tight junction - Danio rerio (zebrafish); dre04810 Regulation of actin cytoskeleton - Danio rerio (zebrafish); | IPR011992; IPR002048;                                  | EF-hand domain pair; EF-hand domain;                                                                                                                               |                                                                                                                                                                    |
| Q6PBW7 | rps19   | Ribosomal protein S19                               | _LK(cr)VPDWVDIVK_          | 30  | 1 | LKSGKLGKVPDWVDI |               | cytosol         | ribosome; organelle; intracellular organelle; intracellular non-membrane-bounded organelle; cell part; intracellular; cytoplasm; macromolecular complex; intracellular part; cell; ribonucleoprotein complex; cytoplasmic part; non-membrane-bounded organelle;                                                                                                                                                                                                                                                                                                                                                                                                                                                                                                                                                                                                                                                                                                                                                                                                                                                                                                                                                                                                   | structural constituent of ribosome; structural molecule activity;                                                                                                                                                                                                                                                                                                                                                                                                                                                                                                                                                                                                                                                                                                                       | K02966                                                                                                                                                                                                                                                                                                                                                                                                                                                                                                                                                                                                                                                                                                                                                                                  | RP-S19e; small subunit ribosomal protein S19e | dre03010 Ribosome - Danio rerio (zebrafish);                                                                                                                               |                                                        |                                                                                                                                                                    |                                                                                                                                                                    |
| Q08CK7 | igt2bp1 | Insulin-like growth factor 2 mRNA-binding protein 1 | _LKEENFGPK(cr)EEVK_        | 485 | 1 | EENFGPKEEVKLET  | .....K.E..... | cytosol,nuclear | regulation of cellular process; regulation of gene expression; regulation of cellular biosynthetic process; regulation of primary metabolic process; regulation of macromolecule metabolic process; posttranscriptional regulation of gene expression; regulation of macromolecule biosynthetic process; regulation of cellular metabolic process; regulation of biological process; regulation of cellular protein metabolic process; regulation of translation; regulation of protein metabolic process; regulation of biosynthetic process; regulation of metabolic process; biological regulation; regulation of cellular macromolecule biosynthetic process;                                                                                                                                                                                                                                                                                                                                                                                                                                                                                                                                                                                                 | organelle; intracellular membrane-bounded organelle; intracellular organelle; nucleus; CRD-mediated mRNA stability complex; cell part; intracellular; cytoplasm; macromolecular complex; intracellular part; membrane-bounded organelle; protein complex; cell; cytoplasmic part;                                                                                                                                                                                                                                                                                                                                                                                                                                                                                                       | organic cyclic compound binding; heterocyclic compound binding; RNA binding; mRNA binding; poly(A) RNA binding; nucleoside phosphate binding; mRNA 5'-UTR binding; binding; nucleic acid binding; nucleotide binding; small molecule binding;                                                                                                                                                                                                                                                                                                                                                                                                                                                                                                                                           | K17391                                        |                                                                                                                                                                            | IPR004087; IPR004088; IPR000504; IPR012677;            | K Homology domain; K Homology domain, type 1; RNA recognition motif domain; Nucleotide-binding, alpha-beta pair;                                                   |                                                                                                                                                                    |
| Q7ZTS4 | krt18   | Keratin, type I cytoskeletal 18                     | _LLDGGDFK(cr)LDALEEQK_     | 394 | 1 | LLDGGDFKLDALAE  |               | mitochondria    | intracellular organelle; intracellular non-membrane-bounded organelle; cytoskeletal part; intracellular organelle part; macromolecular complex; intracellular part; cell; organelle part; non-membrane-bounded organelle; organelle; cytoskeleton; intermediate filament cytoskeleton; cell part; intracellular; intermediate filament; protein complex;                                                                                                                                                                                                                                                                                                                                                                                                                                                                                                                                                                                                                                                                                                                                                                                                                                                                                                          | structural molecule activity;                                                                                                                                                                                                                                                                                                                                                                                                                                                                                                                                                                                                                                                                                                                                                           | K07604                                                                                                                                                                                                                                                                                                                                                                                                                                                                                                                                                                                                                                                                                                                                                                                  |                                               |                                                                                                                                                                            |                                                        |                                                                                                                                                                    |                                                                                                                                                                    |

|        |        |                                                |                      |     |   |                              |              |                                                                                                                                                                                                                                                                                                                                                                                                                                                                                                                                                                                                                                                                                                                                                                                                                                                                                                                                                                                                                                                                                                                                                                                                                                                                                                                                                                                                                                                                                                                                                                                                                                                                                                                                                                                                                                                                                                                                                                                                                                                                                                                                                                                                                                                                                                                                                                                                                                                                                                                                                                                                   |                                                                                                                                                                                                                                                                                                                                                                                                                                                                                                                                                                                                                                                                                                                                                                                                                                                                                                                |                                                                                                                                                                                                                                                                                                                                                               |                                                                                                                                                      |                                                                                                                                                                         |  |  |
|--------|--------|------------------------------------------------|----------------------|-----|---|------------------------------|--------------|---------------------------------------------------------------------------------------------------------------------------------------------------------------------------------------------------------------------------------------------------------------------------------------------------------------------------------------------------------------------------------------------------------------------------------------------------------------------------------------------------------------------------------------------------------------------------------------------------------------------------------------------------------------------------------------------------------------------------------------------------------------------------------------------------------------------------------------------------------------------------------------------------------------------------------------------------------------------------------------------------------------------------------------------------------------------------------------------------------------------------------------------------------------------------------------------------------------------------------------------------------------------------------------------------------------------------------------------------------------------------------------------------------------------------------------------------------------------------------------------------------------------------------------------------------------------------------------------------------------------------------------------------------------------------------------------------------------------------------------------------------------------------------------------------------------------------------------------------------------------------------------------------------------------------------------------------------------------------------------------------------------------------------------------------------------------------------------------------------------------------------------------------------------------------------------------------------------------------------------------------------------------------------------------------------------------------------------------------------------------------------------------------------------------------------------------------------------------------------------------------------------------------------------------------------------------------------------------------|----------------------------------------------------------------------------------------------------------------------------------------------------------------------------------------------------------------------------------------------------------------------------------------------------------------------------------------------------------------------------------------------------------------------------------------------------------------------------------------------------------------------------------------------------------------------------------------------------------------------------------------------------------------------------------------------------------------------------------------------------------------------------------------------------------------------------------------------------------------------------------------------------------------|---------------------------------------------------------------------------------------------------------------------------------------------------------------------------------------------------------------------------------------------------------------------------------------------------------------------------------------------------------------|------------------------------------------------------------------------------------------------------------------------------------------------------|-------------------------------------------------------------------------------------------------------------------------------------------------------------------------|--|--|
| Q8UVG7 | fabp3  | Fatty acid binding protein 3, muscle and heart | ...LLHVQK(cr)WDGK_   | 97  | 1 | GKLLHVQKWDGKETT              | cytosol      | lipid binding; binding; transporter activity;                                                                                                                                                                                                                                                                                                                                                                                                                                                                                                                                                                                                                                                                                                                                                                                                                                                                                                                                                                                                                                                                                                                                                                                                                                                                                                                                                                                                                                                                                                                                                                                                                                                                                                                                                                                                                                                                                                                                                                                                                                                                                                                                                                                                                                                                                                                                                                                                                                                                                                                                                     | K08752                                                                                                                                                                                                                                                                                                                                                                                                                                                                                                                                                                                                                                                                                                                                                                                                                                                                                                         | FABP3; fatty acid-binding protein 3, muscle and heart<br>dre03320 PPAR signaling pathway - Danio rerio (zebrafish);                                                                                                                                                                                                                                           | IPR000463; Calycin; IPR012674; IPR000566; IPR011038;                                                                                                 | Cytosolic fatty-acid binding; Calycin; Lipocalin/cytosolic fatty-acid binding domain; Calycin-like;                                                                     |  |  |
| Q77306 | ckmb   | Uncharacterized protein                        | ...LMVEMEK(cr)K_     | 364 | 1 | KLMVEMEKLEKGES .....K.L..... | cytosol      | ATP binding; nucleoside phosphate binding; nucleoside binding; ion binding; nucleoside binding; organic cyclic compound binding; heterocyclic compound binding; ribonucleoside binding; carbohydrate derivative binding; kinase activity; catalytic activity; ribonucleotide binding; binding; purine ribonucleoside binding; anion binding; purine ribonucleotide binding; adenylyl ribonucleotide binding; adenylyl nucleotide binding; purine nucleoside binding; transferase activity; transferase activity, transferring phosphorus-containing groups; purine nucleoside binding; small molecule binding; purine ribonucleoside triphosphate binding;                                                                                                                                                                                                                                                                                                                                                                                                                                                                                                                                                                                                                                                                                                                                                                                                                                                                                                                                                                                                                                                                                                                                                                                                                                                                                                                                                                                                                                                                                                                                                                                                                                                                                                                                                                                                                                                                                                                                        |                                                                                                                                                                                                                                                                                                                                                                                                                                                                                                                                                                                                                                                                                                                                                                                                                                                                                                                | IPR022413; IPR022414; IPR014746;                                                                                                                                                                                                                                                                                                                              | ATP:guanido phosphotransferase, N-terminal; ATP:guanido phosphotransferase, catalytic domain; Glutamine synthetase/guanido kinase, catalytic domain; |                                                                                                                                                                         |  |  |
| A2BHA3 | ckma   | Uncharacterized protein                        | ...LMVEMEK(cr)K_     | 365 | 1 | KLMVEMEKLEKGES .....K.L..... | cytosol      | ATP binding; nucleoside phosphate binding; nucleoside binding; ion binding; nucleoside binding; organic cyclic compound binding; heterocyclic compound binding; ribonucleoside binding; carbohydrate derivative binding; kinase activity; catalytic activity; ribonucleotide binding; binding; purine ribonucleoside binding; anion binding; purine ribonucleotide binding; adenylyl ribonucleotide binding; adenylyl nucleotide binding; purine nucleoside binding; transferase activity; transferase activity, transferring phosphorus-containing groups; purine nucleotide binding; small molecule binding; purine ribonucleoside triphosphate binding;                                                                                                                                                                                                                                                                                                                                                                                                                                                                                                                                                                                                                                                                                                                                                                                                                                                                                                                                                                                                                                                                                                                                                                                                                                                                                                                                                                                                                                                                                                                                                                                                                                                                                                                                                                                                                                                                                                                                        | K00933                                                                                                                                                                                                                                                                                                                                                                                                                                                                                                                                                                                                                                                                                                                                                                                                                                                                                                         | E2.7.3.2: creatine kinase [EC:2.7.3.2]<br>dre00330 Arginine and proline metabolism - Danio rerio (zebrafish); dre01100 Metabolic pathways - Danio rerio (zebrafish);                                                                                                                                                                                          | IPR022413; IPR022414; IPR014746;                                                                                                                     | ATP:guanido phosphotransferase, N-terminal; ATP:guanido phosphotransferase, catalytic domain; Glutamine synthetase/guanido kinase, catalytic domain;                    |  |  |
| B8JIS1 | atp5f1 | Uncharacterized protein                        | ...LNADK(cr)IAK_     | 127 | 1 | ADKLNADKIAKAEV .....DK.....  | mitochondria | nucleoside metabolic process; purine nucleoside metabolic process; purine ribonucleoside monophosphate metabolic process; nucleotide metabolic process; single-organism process; purine ribonucleoside biosynthetic process; nucleoside biosynthetic process; biosynthetic process; ribonucleoside monophosphate biosynthetic process; cellular metabolic process; phosphate-containing compound metabolic process; establishment of localization; ribose phosphate biosynthetic process; metabolic process; carbohydrate derivative biosynthetic process; nucleoside phosphate metabolic process; ribose phosphate metabolic process; purine nucleoside triphosphate biosynthetic process; single-organism transport; heterocyclic biosynthetic process; cation transmembrane transport; purine ribonucleoside triphosphate biosynthetic process; small molecule metabolic process; ATP biosynthetic process; single-organism cellular process; purine ribonucleoside triphosphate metabolic process; organic cyclic compound metabolic process; purine-containing compound metabolic process; energy coupled proton transport, down electrochemical gradient; ribonucleoside triphosphate metabolic process; purine ribonucleoside triphosphate metabolic process; positive regulation of cellular protein metabolic process; positive regulation of protein complex disassembly; posttranscriptional regulation of gene expression; regulation of translational termination; positive regulation of biosynthetic process; single-organism process; biosynthetic process; cellular metabolic process; positive regulation of cellular component organization; metabolic process; positive regulation of metabolic process; protein metabolic process; macromolecule metabolic process; translation; regulation of gene expression; regulation of cellular biosynthetic process; positive regulation of translational termination; positive regulation of translation; regulation of primary metabolic process; single-organism cellular process; positive regulation of cellular process; regulation of cellular metabolic process; regulation of cellular protein metabolic process; regulation of biological process; single-organism metabolic process; positive regulation of macromolecule biosynthetic process; cellular macromolecule metabolic process; regulation of metabolic process; positive regulation of macromolecule metabolic process; cellular protein modification process; regulation of protein complex disassembly; protein modification process; regulation of cellular | intracellular organelle, membrane; mitochondrial part; organelle membrane; organelle envelope; intracellular organelle part; cytoplasm; macromolecular complex; intracellular part; mitochondrial proton-transporting ATP synthase complex, coupling factor F(0); cell; mitochondrial membrane part; proton-transporting ATP synthase complex; mitochondrion; organelle part; intracellular membrane-bounded organelle; organelle; mitochondrial envelope; mitochondrial proton-transporting ATP synthase complex; membrane part; cell part; intracellular; proton-transporting two-sector ATPase complex; envelope; organelle inner membrane; proton-transporting ATP synthase complex, coupling factor F(0); protein complex; membrane-bounded organelle; mitochondrial inner membrane; proton-transporting two-sector ATPase complex; proton-transporting domain; mitochondrial membrane; cytoplasmic part; | ion transmembrane transporter activity; substrate-specific transporter activity; monovalent inorganic cation transmembrane transporter activity; hydrogen ion transmembrane transporter activity; cation transmembrane transporter activity; substrate-specific transmembrane transporter activity; transporter activity; transmembrane transporter activity; | K02127                                                                                                                                               | ATP5F0B; F-type H+ transport g ATPase subunit b<br>dre01100 Metabolic pathways - Danio rerio (zebrafish); dre00190 Oxidative phosphorylation - Danio rerio (zebrafish); |  |  |
| B0UY94 | eif5a2 | Eukaryotic translation initiation factor 5A    | ...LPEGLGK(cr)EIESK_ | 122 | 1 | LPEGLGKIEISKF_               | cytosol      | organic cyclic compound binding; heterocyclic compound binding; ribosome binding; RNA binding; translation factor activity; nucleic acid binding; translation elongation factor activity; nucleic acid binding; macromolecular complex binding; translation initiation factor activity; ribonucleoprotein complex binding;                                                                                                                                                                                                                                                                                                                                                                                                                                                                                                                                                                                                                                                                                                                                                                                                                                                                                                                                                                                                                                                                                                                                                                                                                                                                                                                                                                                                                                                                                                                                                                                                                                                                                                                                                                                                                                                                                                                                                                                                                                                                                                                                                                                                                                                                        |                                                                                                                                                                                                                                                                                                                                                                                                                                                                                                                                                                                                                                                                                                                                                                                                                                                                                                                | IPR008991; IPR012340; IPR014722; IPR020189;                                                                                                                                                                                                                                                                                                                   | Translation protein SH3-like domain; Nucleic acid-binding, OB-fold; Ribosomal protein L2 domain 2; Translation elongation factor, IF5A C-terminal;   |                                                                                                                                                                         |  |  |

|        |        |                                                  |                        |      |   |                 |               |                 |                                                                                                                                                                                                                                                                                                                                                                                                                                                                                                                                                                                                                                                                                                                                                  |        |                                              |                                                                                                                            |                                                                                                                                                                                                                                                                                                      |                                                                                                                                                      |
|--------|--------|--------------------------------------------------|------------------------|------|---|-----------------|---------------|-----------------|--------------------------------------------------------------------------------------------------------------------------------------------------------------------------------------------------------------------------------------------------------------------------------------------------------------------------------------------------------------------------------------------------------------------------------------------------------------------------------------------------------------------------------------------------------------------------------------------------------------------------------------------------------------------------------------------------------------------------------------------------|--------|----------------------------------------------|----------------------------------------------------------------------------------------------------------------------------|------------------------------------------------------------------------------------------------------------------------------------------------------------------------------------------------------------------------------------------------------------------------------------------------------|------------------------------------------------------------------------------------------------------------------------------------------------------|
| Q1LWN2 | vig1   | Uncharacterized protein                          | _LPiIVTYAKK(cr)K_      | 1274 | 1 | IIVTTYAKKLGKHL  | .....K.L..... | plasma membrane | lipid transporter activity; substrate-specific transporter activity; transporter activity;                                                                                                                                                                                                                                                                                                                                                                                                                                                                                                                                                                                                                                                       |        |                                              |                                                                                                                            | Vitellogen, superhelical; Vitellinogen, open beta-sheet, subdomain 1; Vitellinogen, open beta-sheet, subdomain 2; Lipid transport protein, N-terminal; Vitellinogen, beta-sheet shell; Vitellinogen, beta-sheet N-terminal; Lipid transport protein, beta-sheet shell; Vitellinogen, open beta-sheet |                                                                                                                                                      |
| Q8AY63 | ckbb   | Brain-subtype creatine kinase                    | _LPNVSK(cr)HEK_        | 304  | 1 | VKLPNVSKHEKFGEI | .....K.E..... | cytosol         | ATP binding; nucleoside phosphate binding; creatine kinase activity; nucleoside binding; ion binding; phosphotransferase activity; nitrogenous group as acceptor; nucleotide binding; organic cyclic compound binding; heterocyclic compound binding; ribonucleoside binding; carbohydrate derivative binding; kinase activity; catalytic activity; ribonucleoside binding; binding; purine ribonucleoside binding; anion binding; purine ribonucleoside binding; adenylyl ribonucleotide binding; adenylyl nucleotide binding; purine nucleoside binding; transferase activity; transferase activity, transferring phosphorus-containing groups; purine nucleotide binding; small molecule binding; purine ribonucleoside triphosphate binding; | K00933 | E2.7.3.2; creatine kinase [EC:2.7.3.2]       | dre00330 Arginine and proline metabolism - Danio rerio (zebrafish); dre01100 Metabolic pathways - Danio rerio (zebrafish); | IPR022413; IPR014746; IPR022414; IPR022415; IPR014746; IPR022414;                                                                                                                                                                                                                                    | ATP:guanido phosphotransferase, N-terminal; Glutamine synthetase/guanido kinase, catalytic domain; ATP:guanido phosphotransferase, catalytic domain; |
| Q803E5 | ettf1b | Eukaryotic translation termination factor 1      | _LQAK(cr)VLK_          | 249  | 1 | FDPRLQAKVLKLDVI | .....K.L..... | cytosol         | organic cyclic compound binding; translation termination factor activity; heterocyclic compound binding; RNA binding; translation factor activity, nucleic acid binding; binding; nucleic acid binding; translation release factor activity, codon specific; translation release factor activity;                                                                                                                                                                                                                                                                                                                                                                                                                                                | K03265 | ETF1; peptide chain release factor subunit 1 | dre03015 mRNA surveillance pathway - Danio rerio (zebrafish);                                                              | IPR005141; IPR029064; IPR005142; IPR005140; IPR024049;                                                                                                                                                                                                                                               | eRF1 domain 2; eRF1 domain 1; eRF1 domain 3; Peptide-like; Peptide Chain Release Factor eRF1aRF1, N-terminal;                                        |
| B8JHR2 | tp1    | Translationally-controlled tumor protein homolog | _LQETSYDK(cr)K_        | 72   | 1 | LQETSYDKKSYTAYI | .....DK.....  | cytosol         |                                                                                                                                                                                                                                                                                                                                                                                                                                                                                                                                                                                                                                                                                                                                                  |        |                                              |                                                                                                                            | Mss4translationall IPR011323; IPR011057; y controlled tumour-associated TCTP; Mss4-like;                                                                                                                                                                                                             |                                                                                                                                                      |
| Q92051 | cahz   | Carbonic anhydrase                               | _LQK(cr)VLDALDDIK_     | 158  | 1 | AANFRLQKVLDDLD  | .....K.L..... | cytosol         | gas transport; response to osmotic stress; response to stress; response to abiotic stimulus; small molecule metabolic process; single-organism cellular process; single-organism process; organic substance transport; response to salt stress; response to stimulus; cellular metabolic process; hypotonic response; establishment of localization; transport; metabolic process; one-carbon compound transport; one-carbon metabolic process; single-organism localization; carbon dioxide transport; single-organism metabolic process; localization; cellular process; hypotonic salinity response; single-organism transport;                                                                                                               | K18245 | CA2; carbonic anhydrase 2 [EC:4.2.1.1]       | dre00910 Nitrogen metabolism - Danio rerio (zebrafish);                                                                    | IPR001148;                                                                                                                                                                                                                                                                                           | Alpha carbonic anhydrase;                                                                                                                            |
| Q7T306 | ckmb   | Uncharacterized protein                          | _LSTHAK(cr)FEELTR_     | 306  | 1 | PKLSTHAKFEELTR  | .....K.E..... | cytosol         | ATP binding; nucleoside phosphate binding; nucleoside binding; ion binding; nucleotide binding; organic cyclic compound binding; heterocyclic compound binding; ribonucleoside binding; carbohydrate derivative binding; kinase activity; catalytic activity; ribonucleoside binding; binding; purine ribonucleoside binding; anion binding; purine ribonucleoside binding; adenylyl ribonucleotide binding; adenylyl nucleotide binding; purine nucleoside binding; transferase activity; transferase activity, transferring phosphorus-containing groups; purine nucleotide binding; small molecule binding; purine ribonucleoside triphosphate binding;                                                                                       |        |                                              |                                                                                                                            | ATP:guanido phosphotransferase, N-terminal; ATP:guanido phosphotransferase, catalytic domain; IPR022413; IPR022414; IPR014746;                                                                                                                                                                       | Glutamine synthetase/guanido kinase, catalytic domain;                                                                                               |
| A2BHA3 | ckma   | Uncharacterized protein                          | _LSTHAK(cr)FEELTR_     | 307  | 1 | PKLSTHAKFEELTR  | .....K.E..... | cytosol         | ATP binding; nucleoside phosphate binding; nucleoside binding; ion binding; nucleotide binding; organic cyclic compound binding; heterocyclic compound binding; ribonucleoside binding; carbohydrate derivative binding; kinase activity; catalytic activity; ribonucleoside binding; binding; purine ribonucleoside binding; anion binding; purine ribonucleoside binding; adenylyl ribonucleotide binding; adenylyl nucleotide binding; purine nucleoside binding; transferase activity; transferase activity, transferring phosphorus-containing groups; purine nucleotide binding; small molecule binding; purine ribonucleoside triphosphate binding;                                                                                       | K00933 | E2.7.3.2; creatine kinase [EC:2.7.3.2]       | dre00330 Arginine and proline metabolism - Danio rerio (zebrafish); dre01100 Metabolic pathways - Danio rerio (zebrafish); | IPR022413; IPR022414; IPR014746;                                                                                                                                                                                                                                                                     | ATP:guanido phosphotransferase, N-terminal; ATP:guanido phosphotransferase, catalytic domain; Glutamine synthetase/guanido kinase, catalytic domain; |
| A2BHA3 | ckma   | Uncharacterized protein                          | _LSVEALSLLDGEFK(cr)GK_ | 170  | 1 | SSLDGEFKGKYPLK  | .....K.E..... | cytosol         | ATP binding; nucleoside phosphate binding; nucleoside binding; ion binding; nucleotide binding; organic cyclic compound binding; heterocyclic compound binding; ribonucleoside binding; carbohydrate derivative binding; kinase activity; catalytic activity; ribonucleoside binding; binding; purine ribonucleoside binding; anion binding; purine ribonucleoside binding; adenylyl ribonucleotide binding; adenylyl nucleotide binding; purine nucleoside binding; transferase activity; transferase activity, transferring phosphorus-containing groups; purine nucleotide binding; small molecule binding; purine ribonucleoside triphosphate binding;                                                                                       | K00933 | E2.7.3.2; creatine kinase [EC:2.7.3.2]       | dre00330 Arginine and proline metabolism - Danio rerio (zebrafish); dre01100 Metabolic pathways - Danio rerio (zebrafish); | IPR022413; IPR022414; IPR014746;                                                                                                                                                                                                                                                                     | ATP:guanido phosphotransferase, N-terminal; ATP:guanido phosphotransferase, catalytic domain; Glutamine synthetase/guanido kinase, catalytic domain; |
| Q6XG62 | icn    | Protein S100 (Fragment)                          | _LTLK(cr)GELK_         | 32   | 1 | GDKLTLKSGELKELL | .....K.E..... | cytosol         | cation binding; metal ion binding; calcium ion binding; binding; ion binding;                                                                                                                                                                                                                                                                                                                                                                                                                                                                                                                                                                                                                                                                    |        |                                              |                                                                                                                            | EF-hand domain pair; EF-hand domain; IPR011992; IPR022414; S100CaBP-9k type, calcium binding, subdomain;                                                                                                                                                                                             |                                                                                                                                                      |

|        |          |                         |                                 |      |   |                                  |                 |                                                                                                                                                                                                                                                                                                                                                                                                                                                                                                                                                                                                                                                                                                                                                                                |                                                                                                                                                                                                                                                                                                                                                                                                                                                                                                                                                                                                                                                                                                                                                                                         |        |                                          |                                                                                                                                                                                                                                                                                                                                                                                                                                                                                       |                                                                                                                                                                                                                                                                                                                                                                                          |
|--------|----------|-------------------------|---------------------------------|------|---|----------------------------------|-----------------|--------------------------------------------------------------------------------------------------------------------------------------------------------------------------------------------------------------------------------------------------------------------------------------------------------------------------------------------------------------------------------------------------------------------------------------------------------------------------------------------------------------------------------------------------------------------------------------------------------------------------------------------------------------------------------------------------------------------------------------------------------------------------------|-----------------------------------------------------------------------------------------------------------------------------------------------------------------------------------------------------------------------------------------------------------------------------------------------------------------------------------------------------------------------------------------------------------------------------------------------------------------------------------------------------------------------------------------------------------------------------------------------------------------------------------------------------------------------------------------------------------------------------------------------------------------------------------------|--------|------------------------------------------|---------------------------------------------------------------------------------------------------------------------------------------------------------------------------------------------------------------------------------------------------------------------------------------------------------------------------------------------------------------------------------------------------------------------------------------------------------------------------------------|------------------------------------------------------------------------------------------------------------------------------------------------------------------------------------------------------------------------------------------------------------------------------------------------------------------------------------------------------------------------------------------|
| Q7T334 | mdh2     | Malate dehydrogenase    | _LVDAMTELK(cr)GSK_              | 323  | 1 | ADAMTELKGSIKKGE                  | mitochondria    | tricarboxylic acid metabolic process; dicarboxylic acid metabolic process; oxidation-reduction process; small molecule metabolic process; tricarboxylic acid cycle; single-organism cellular process; single-organism process; primary metabolic process; carbohydrate metabolic process; cellular respiration; cellular metabolic process; organic substance metabolic process; citrate metabolic process; metabolic process; generation of precursor metabolites and energy; cellular carbohydrate metabolic process; aerobic respiration; single-organism metabolic process; energy derivation by oxidation of organic compounds; malate metabolic process; carboxylic acid metabolic process; organic acid metabolic process; cellular process; oxoacid metabolic process; | organic cyclic compound binding; heterocyclic compound binding; oxidoreductase activity, acting on CH-OH group of donors; oxidoreductase activity, acting on the CH-OH group of donors, NAD or NADP as acceptor; nucleoside phosphate binding; catalytic activity; binding; nucleotide binding; malate dehydrogenase activity; L-malate dehydrogenase activity; small molecule binding; oxidoreductase activity;                                                                                                                                                                                                                                                                                                                                                                        | K00026 | MDH2; malate dehydrogenase [EC:1.1.1.37] | dre01200 Carbon metabolism - Danio rerio (zebrafish); dre01100 Metabolic pathways - Danio rerio (zebrafish); dre00620 Pyruvate metabolism - Danio rerio (zebrafish); dre00630 Glyoxylate and dicarboxylate metabolism - Danio rerio (zebrafish); dre00020 Citrate cycle (TCA cycle) - Danio rerio (zebrafish); dre00270 Cysteine and methionine metabolism - Danio rerio (zebrafish);                                                                                                 | Lactate/malate dehydrogenase, C-terminal; NAD(P)-binding domain; Lactate/malate dehydrogenase, N-terminal; Lactate dehydrogenase/glyoxylate hydratase, family 4, C-terminal;                                                                                                                                                                                                             |
| F8W3N3 | fabp7a   | Uncharacterized protein | _LVDSQNFDEYMK(cr)SLGVGFATR_     | 22   | 1 | QNFDEYMKSLGVGFA .....K.L.....    | cytosol         |                                                                                                                                                                                                                                                                                                                                                                                                                                                                                                                                                                                                                                                                                                                                                                                | lipid binding; binding; transporter activity;                                                                                                                                                                                                                                                                                                                                                                                                                                                                                                                                                                                                                                                                                                                                           |        |                                          | IPR000463; IPR012674; IPR000566; IPR011038;                                                                                                                                                                                                                                                                                                                                                                                                                                           | Cytosolic fatty-acid binding; Calycin; Lipocalin/cytosolic fatty-acid binding domain; Calycin-like;                                                                                                                                                                                                                                                                                      |
| Q1MTC4 | vlg2     | Uncharacterized protein | _LVPEFAHDK(cr)TVYVK_            | 28   | 1 | VPEFAHDKTVYVYKE .....DK.....     | extracellular   | response to organic cyclic compound; response to lipid; response to chemical; response to estrogen; response to oxygen-containing compound; response to steroid hormone; response to endogenous stimulus; response to alcohol; response to estradiol; response to organic substance; response to hormone; response to stimulus;                                                                                                                                                                                                                                                                                                                                                                                                                                                | lipid transporter activity; substrate-specific transporter activity; transporter activity;                                                                                                                                                                                                                                                                                                                                                                                                                                                                                                                                                                                                                                                                                              |        |                                          | IPR011030; IPR015817; IPR015818; IPR001747; IPR015816; IPR015258; IPR015819; IPR001846; IPR015255;                                                                                                                                                                                                                                                                                                                                                                                    | Vitellogen, superficial; Vitellinogen, open beta-sheet, subdomain 1; Vitellinogen, open beta-sheet, subdomain 2; Lipid transport protein, N-terminal; Vitellinogen, beta-sheet N-terminal; Vitellinogen, beta-sheet shell; Lipid transport protein, beta-sheet shell; von Willebrand factor, type D domain; Vitellinogen, open beta-sheet; K Homology domain; K Homology domain, type 1; |
| A2CE73 | khdbts1a | Uncharacterized protein | _M(ox)AHAMDEVK(cr)K_            | 165  | 1 | AHAMDEVKFLMPVE                   | cytosol         |                                                                                                                                                                                                                                                                                                                                                                                                                                                                                                                                                                                                                                                                                                                                                                                | organic cyclic compound binding; heterocyclic compound binding; RNA binding; nucleic acid binding;                                                                                                                                                                                                                                                                                                                                                                                                                                                                                                                                                                                                                                                                                      |        |                                          | IPR004087; IPR004088;                                                                                                                                                                                                                                                                                                                                                                                                                                                                 | K Homology domain; K Homology domain, type 1;                                                                                                                                                                                                                                                                                                                                            |
| B8A561 | myhz1.2  | Uncharacterized protein | _M(ox)EIDDLSSNM(ox)EAVAK(cr)AK_ | 1242 | 1 | SNMEAVAKAKANLEK                  | nuclear         | intracellular organelle; intracellular non-membrane-bounded organelle; cytoskeleton part; intracellular organelle part; macromolecular complex; intracellular part; cell; actin cytoskeleton; organelle part; non-membrane-bounded organelle; organelle; cytoskeleton; cell part; intracellular; myosin complex; protein complex;                                                                                                                                                                                                                                                                                                                                                                                                                                              | ATP binding; motor activity; nucleoside phosphate binding; nucleoside binding; ion binding; hydrolase activity, acting on acid anhydrides; hydrolase activity; nucleotide binding; nucleoside-triphosphatase activity; organic cyclic compound binding; heterocyclic compound binding; ribonucleoside binding; carbohydrate derivative binding; pyrophosphatase activity; catalytic activity; ribonucleotide binding; binding; purine ribonucleoside binding; anion binding; purine ribonucleotide binding; adenylyl ribonucleotide binding; adenylyl nucleotide binding; purine nucleoside binding; hydrolase activity, acting on acid anhydrides, in phosphorus-containing anhydrides; purine nucleotide binding; small molecule binding; purine ribonucleoside triphosphate binding; | K10352 | MYH; myosin heavy chain                  | dre04530 Tight junction - Danio rerio (zebrafish);                                                                                                                                                                                                                                                                                                                                                                                                                                    | Myosin tail; Myosin, N-terminal, SH3-like; Myosin head, motor domain; P-loop containing nucleoside triphosphate hydrolase; Myosin-like IQ motif-containing domain;                                                                                                                                                                                                                       |
| Q6PI62 | calm1a   | Calmodulin              | _M(ox)K(cr)JDTDSEEEI_           | 78   | 1 | TMMARKMKDTSDEEE                  | cytosol,nuclear |                                                                                                                                                                                                                                                                                                                                                                                                                                                                                                                                                                                                                                                                                                                                                                                | cation binding; metal ion binding; calcium ion binding; binding; ion binding;                                                                                                                                                                                                                                                                                                                                                                                                                                                                                                                                                                                                                                                                                                           | K02183 | CALM; calmodulin                         | dre04020 Calcium signaling pathway - Danio rerio (zebrafish); dre04916 Melanogenesis - Danio rerio (zebrafish); dre04070 Phosphatidylinositol signaling system - Danio rerio (zebrafish); dre04912 GnRH signaling pathway - Danio rerio (zebrafish); dre04910 Insulin signaling pathway - Danio rerio (zebrafish); dre04114 Oocyte meiosis - Danio rerio (zebrafish); dre04744 Phototransduction - Danio rerio (zebrafish); dre04270 Vascular smooth muscle contraction - Danio rerio | EF-hand domain; EF-hand domain pair;                                                                                                                                                                                                                                                                                                                                                     |
| B8A561 | myhz1.2  | Uncharacterized protein | _M(ox)K(cr)NSYEETLDQLET_K_      | 1487 | 1 | STELFKMKNSEETL .....E.....K..... | nuclear         | intracellular organelle; intracellular non-membrane-bounded organelle; cytoskeleton part; intracellular organelle part; macromolecular complex; intracellular part; cell; actin cytoskeleton; organelle part; non-membrane-bounded organelle; organelle; cytoskeleton; cell part; intracellular; myosin complex; protein complex;                                                                                                                                                                                                                                                                                                                                                                                                                                              | ATP binding; motor activity; nucleoside phosphate binding; nucleoside binding; ion binding; hydrolase activity, acting on acid anhydrides; hydrolase activity; nucleotide binding; nucleoside-triphosphatase activity; organic cyclic compound binding; heterocyclic compound binding; ribonucleoside binding; carbohydrate derivative binding; pyrophosphatase activity; catalytic activity; ribonucleotide binding; binding; purine ribonucleoside binding; anion binding; purine ribonucleotide binding; adenylyl ribonucleotide binding; adenylyl nucleotide binding; purine nucleoside binding; hydrolase activity, acting on acid anhydrides, in phosphorus-containing anhydrides; purine nucleotide binding; small molecule binding; purine ribonucleoside triphosphate binding; | K10352 | MYH; myosin heavy chain                  | dre04530 Tight junction - Danio rerio (zebrafish);                                                                                                                                                                                                                                                                                                                                                                                                                                    | Myosin tail; Myosin, N-terminal, SH3-like; Myosin head, motor domain; P-loop containing nucleoside triphosphate hydrolase; Myosin-like IQ motif-containing domain;                                                                                                                                                                                                                       |

|        |          |                                   |                                    |      |   |                 |               |                 |                                                                                                                                                                                                                                                                                                                                                                                                                                                          |                                                                                                                                                                                                                                                                                                                                                                                                                                                                                                                                                                                                                                                                                                                                                                                         |        |                                       |                                                                                                                                                                                                                                                                                                                                                                                                                                                                                                                                                                                                                                                                                                                                                                                                                         |                                                        |                                                                                                                                                                   |
|--------|----------|-----------------------------------|------------------------------------|------|---|-----------------|---------------|-----------------|----------------------------------------------------------------------------------------------------------------------------------------------------------------------------------------------------------------------------------------------------------------------------------------------------------------------------------------------------------------------------------------------------------------------------------------------------------|-----------------------------------------------------------------------------------------------------------------------------------------------------------------------------------------------------------------------------------------------------------------------------------------------------------------------------------------------------------------------------------------------------------------------------------------------------------------------------------------------------------------------------------------------------------------------------------------------------------------------------------------------------------------------------------------------------------------------------------------------------------------------------------------|--------|---------------------------------------|-------------------------------------------------------------------------------------------------------------------------------------------------------------------------------------------------------------------------------------------------------------------------------------------------------------------------------------------------------------------------------------------------------------------------------------------------------------------------------------------------------------------------------------------------------------------------------------------------------------------------------------------------------------------------------------------------------------------------------------------------------------------------------------------------------------------------|--------------------------------------------------------|-------------------------------------------------------------------------------------------------------------------------------------------------------------------|
| B8A561 | myh2.2   | Uncharacterized protein           | _M(x)QGSLEQIIAANPLLEAYGNAK(cr)TVR_ | 238  | 1 | LEAYGNAKTVRNDNS | .....K.V..... | nuclear         | intracellular organelle; intracellular non-membrane-bounded organelle; cytoskeleton part; intracellular organelle part; macromolecular complex; intracellular part; cell; actin cytoskeleton; organelle part; non-membrane-bounded organelle; organelle; cytoskeleton; cell part; intracellular; myosin complex; protein complex;                                                                                                                        | ATP binding; motor activity; nucleoside phosphate binding; nucleoside binding; ion binding; hydrolase activity, acting on acid anhydrides; hydrolase activity; nucleotide binding; nucleoside-triphosphatase activity; organic cyclic compound binding; heterocyclic compound binding; ribonucleoside binding; carbohydrate derivative binding; pyrophosphatase activity; catalytic activity; ribonucleotide binding; binding; purine ribonucleotide binding; anion binding; purine ribonucleotide binding; adenylyl ribonucleotide binding; adenylyl nucleotide binding; purine nucleoside binding; hydrolase activity, acting on acid anhydrides, in phosphorus-containing anhydrides; purine nucleotide binding; small molecule binding; purine ribonucleoside triphosphate binding; | K10352 | MYH; myosin heavy chain               | dre04530 Tight junction - Danio rerio (zebrafish);                                                                                                                                                                                                                                                                                                                                                                                                                                                                                                                                                                                                                                                                                                                                                                      | IPR002928; IPR004009; IPR001609; IPR027417; IPR027401; | Myosin tail; Myosin N-terminal, SH3-like; Myosin head, motor domain; P-loop containing nucleoside triphosphate hydrolase; Myosin-like IQ motif-containing domain; |
| Q7ZV7  | actb     | Actin, cytoplasmic 1              | _M(x)QK(cr)EITSLAPSTMK_            | 315  | 1 | GIADRMQKETS LAP | .....K.L..... | cytoskeleton    | cytoskeleton; organelle; intracellular organelle; intracellular non-membrane-bounded organelle; cell part; intracellular; cytoplasm; intracellular part; cell; non-membrane-bounded organelle;                                                                                                                                                                                                                                                           | ATP binding; nucleoside phosphate binding; nucleoside binding; ion binding; nucleotide binding; organic cyclic compound binding; heterocyclic compound binding; ribonucleoside binding; carbohydrate derivative binding; ribonucleotide binding; binding; purine ribonucleoside binding; anion binding; purine ribonucleotide binding; adenylyl ribonucleotide binding; purine nucleoside binding; purine nucleotide binding; small molecule binding; purine ribonucleoside triphosphate binding;                                                                                                                                                                                                                                                                                       | K05692 | ACTB_G1; actin beta1gamma a 1         | dre04510 Focal adhesion - Danio rerio (zebrafish); dre04145 Phagosome - Danio rerio (zebrafish); dre04530 Tight junction - Danio rerio (zebrafish); dre05132 Salmonella infection - Danio rerio (zebrafish); dre04810 Regulation of actin cytoskeleton - Danio rerio (zebrafish); dre04520 Adherens junction - Danio rerio (zebrafish);                                                                                                                                                                                                                                                                                                                                                                                                                                                                                 |                                                        |                                                                                                                                                                   |
| A2CE73 | khdrbs1a | Uncharacterized protein           | _MAHAMDEVK(cr)K_                   | 165  | 1 | AHAMDEVKFLMPVE  |               | cytosol         |                                                                                                                                                                                                                                                                                                                                                                                                                                                          | organic cyclic compound binding; heterocyclic compound binding; RNA binding; binding; nucleic acid binding;                                                                                                                                                                                                                                                                                                                                                                                                                                                                                                                                                                                                                                                                             |        |                                       | IPR004087; IPR004088;                                                                                                                                                                                                                                                                                                                                                                                                                                                                                                                                                                                                                                                                                                                                                                                                   | K Homology domain; K Homology domain, type 1;          |                                                                                                                                                                   |
| B8A568 | myh2.1   | Uncharacterized protein           | _MEIDDLSSNM(x)EAVAK(cr)AK_         | 1242 | 1 | SNMEAVAKAKANLEK |               | nuclear         | intracellular organelle; intracellular non-membrane-bounded organelle; cytoskeleton part; intracellular organelle part; macromolecular complex; intracellular part; cell; actin cytoskeleton; organelle part; non-membrane-bounded organelle; organelle; cytoskeleton; cell part; intracellular; myosin complex; protein complex;                                                                                                                        | ATP binding; motor activity; nucleoside phosphate binding; nucleoside binding; ion binding; hydrolase activity, acting on acid anhydrides; hydrolase activity; nucleotide binding; nucleoside-triphosphatase activity; organic cyclic compound binding; heterocyclic compound binding; ribonucleoside binding; carbohydrate derivative binding; pyrophosphatase activity; catalytic activity; ribonucleotide binding; binding; purine ribonucleotide binding; anion binding; purine ribonucleotide binding; adenylyl ribonucleotide binding; adenylyl nucleotide binding; purine nucleoside binding; hydrolase activity, acting on acid anhydrides, in phosphorus-containing anhydrides; purine nucleotide binding; small molecule binding; purine ribonucleoside triphosphate binding; | K10352 | MYH; myosin heavy chain               | dre04530 Tight junction - Danio rerio (zebrafish);                                                                                                                                                                                                                                                                                                                                                                                                                                                                                                                                                                                                                                                                                                                                                                      | IPR002928; IPR004009; IPR001609; IPR027417; IPR027401; | Myosin tail; Myosin N-terminal, SH3-like; Myosin head, motor domain; P-loop containing nucleoside triphosphate hydrolase; Myosin-like IQ motif-containing domain; |
| B8A561 | myh2.2   | Uncharacterized protein           | _MEIDDLSSNM(x)EAVAK(cr)AK_         | 1242 | 1 | SNMEAVAKAKANLEK |               | nuclear         | intracellular organelle; intracellular non-membrane-bounded organelle; cytoskeleton part; intracellular organelle part; macromolecular complex; intracellular part; cell; actin cytoskeleton; organelle part; non-membrane-bounded organelle; organelle; cytoskeleton; cell part; intracellular; myosin complex; protein complex;                                                                                                                        | ATP binding; motor activity; nucleoside phosphate binding; nucleoside binding; ion binding; hydrolase activity, acting on acid anhydrides; hydrolase activity; nucleotide binding; nucleoside-triphosphatase activity; organic cyclic compound binding; heterocyclic compound binding; ribonucleoside binding; carbohydrate derivative binding; pyrophosphatase activity; catalytic activity; ribonucleotide binding; binding; purine ribonucleotide binding; anion binding; purine ribonucleotide binding; adenylyl ribonucleotide binding; adenylyl nucleotide binding; purine nucleoside binding; hydrolase activity, acting on acid anhydrides, in phosphorus-containing anhydrides; purine nucleotide binding; small molecule binding; purine ribonucleoside triphosphate binding; | K10352 | MYH; myosin heavy chain               | dre04530 Tight junction - Danio rerio (zebrafish);                                                                                                                                                                                                                                                                                                                                                                                                                                                                                                                                                                                                                                                                                                                                                                      | IPR002928; IPR004009; IPR001609; IPR027417; IPR027401; | Myosin tail; Myosin N-terminal, SH3-like; Myosin head, motor domain; P-loop containing nucleoside triphosphate hydrolase; Myosin-like IQ motif-containing domain; |
| Q6P52  | calm1a   | Calmodulin                        | _MK(cr)DTDSEEEER_                  | 78   | 1 | TMMARKMKDTSDEEE |               | cytosol,nuclear |                                                                                                                                                                                                                                                                                                                                                                                                                                                          | cation binding; metal ion binding; calcium ion binding; binding; ion binding;                                                                                                                                                                                                                                                                                                                                                                                                                                                                                                                                                                                                                                                                                                           | K02183 | CALM; calmodulin                      | dre04020 Calcium signaling pathway - Danio rerio (zebrafish); dre04315 Melanogenesis - Danio rerio (zebrafish); dre04070 Phosphatidylinositol signaling system - Danio rerio (zebrafish); dre04012 GsH signaling pathway - Danio rerio (zebrafish); dre04910 Insulin signaling pathway - Danio rerio (zebrafish); dre04281 Adrenergic signaling in cardiomyocytes - Danio rerio (zebrafish); dre04114 Oocyte meiosis - Danio rerio (zebrafish); dre04744 Phototransduction - Danio rerio (zebrafish); dre04270 Vascular smooth muscle contraction - Danio rerio (zebrafish); dre04010 MAPK signaling pathway - Danio rerio (zebrafish); dre04141 Protein processing in endoplasmic reticulum - Danio rerio (zebrafish); dre04144 Endocytosis - Danio rerio (zebrafish); dre03040 Spliceosome - Danio rerio (zebrafish); | IPR002048; IPR011992;                                  | EF-hand domain; EF-hand domain pair;                                                                                                                              |
| Q6NYR4 | hspa8    | Heat shock cognate 71 kDa protein | _MK(cr)EIAEAYLGK_                  | 128  | 1 | SMVLTKMKEIAEAYL | .....K.L..... | cytosol         | response to stress; response to stimulus;                                                                                                                                                                                                                                                                                                                                                                                                                | ATP binding; nucleoside phosphate binding; nucleoside binding; ion binding; nucleotide binding; organic cyclic compound binding; heterocyclic compound binding; ribonucleoside binding; carbohydrate derivative binding; ribonucleotide binding; binding; purine ribonucleoside binding; anion binding; purine ribonucleotide binding; adenylyl ribonucleotide binding; adenylyl nucleotide binding; purine nucleoside binding; purine nucleotide binding; small molecule binding; purine ribonucleoside triphosphate binding;                                                                                                                                                                                                                                                          | K03283 | HSPA1_8; heat shock 70kDa protein 1/8 | dre04010 MAPK signaling pathway - Danio rerio (zebrafish); dre04141 Protein processing in endoplasmic reticulum - Danio rerio (zebrafish); dre04144 Endocytosis - Danio rerio (zebrafish); dre03040 Spliceosome - Danio rerio (zebrafish);                                                                                                                                                                                                                                                                                                                                                                                                                                                                                                                                                                              | IPR029048; IPR029047;                                  | Heat shock protein 70kD, C-terminal domain; Heat shock protein 70kD, peptide-binding domain;                                                                      |
| Q90473 | hspa8    | Heat shock cognate 71 kDa protein | _MK(cr)EIAEAYLGK_                  | 128  | 1 | SMVLTKMKEIAEAYL | .....K.L..... | cytosol         | developmental process; response to wounding; tissue development; response to stress; wound healing; tissue regeneration; single-organism developmental process; fin regeneration; single-organism process; regeneration; developmental growth; response to stimulus; growth; anatomical structure development;                                                                                                                                           | ATP binding; nucleoside phosphate binding; nucleoside binding; ion binding; nucleotide binding; organic cyclic compound binding; heterocyclic compound binding; ribonucleoside binding; carbohydrate derivative binding; ribonucleotide binding; binding; purine ribonucleoside binding; anion binding; purine ribonucleotide binding; adenylyl ribonucleotide binding; adenylyl nucleotide binding; purine nucleoside binding; purine nucleotide binding; small molecule binding; purine ribonucleoside triphosphate binding;                                                                                                                                                                                                                                                          | K03283 | HSPA1_8; heat shock 70kDa protein 1/8 | dre04010 MAPK signaling pathway - Danio rerio (zebrafish); dre04141 Protein processing in endoplasmic reticulum - Danio rerio (zebrafish); dre04144 Endocytosis - Danio rerio (zebrafish); dre03040 Spliceosome - Danio rerio (zebrafish);                                                                                                                                                                                                                                                                                                                                                                                                                                                                                                                                                                              | IPR029048; IPR029047;                                  | Heat shock protein 70kD, C-terminal domain; Heat shock protein 70kD, peptide-binding domain;                                                                      |
| Q6P46  | ctc4     | T-complex protein 1 subunit delta | _MK(cr)IMVVK_                      | 315  | 1 | LHFLNKMIMVKDI   |               | plasma membrane | protein folding; metabolic process; response to stress; response to abiotic stimulus; response to hypoxia; response to oxygen levels; cellular protein metabolic process; cellular macromolecule metabolic process; response to decreased oxygen levels; macromolecule metabolic process; protein metabolic process; response to stimulus; primary metabolic process; cellular process; cellular metabolic process; organic substance metabolic process; | ATP binding; nucleoside phosphate binding; nucleoside binding; ion binding; nucleotide binding; organic cyclic compound binding; heterocyclic compound binding; ribonucleoside binding; carbohydrate derivative binding; ribonucleotide binding; binding; purine ribonucleoside binding; anion binding; purine ribonucleotide binding; adenylyl ribonucleotide binding; adenylyl nucleotide binding; purine nucleoside binding; purine nucleotide binding; small molecule binding; purine ribonucleoside triphosphate binding;                                                                                                                                                                                                                                                          | K09496 |                                       |                                                                                                                                                                                                                                                                                                                                                                                                                                                                                                                                                                                                                                                                                                                                                                                                                         | IPR027410; IPR027409; IPR027413;                       | TCP-1-like chaperonin intermediate domain; GroEL-like apical domain; GroEL-like equatorial domain;                                                                |

|        |           |                                 |                          |      |   |                              |               |                                                                                                                                                                                                                                                                                                                                                                                                                                                                                                                                                                              |                                                                                                                                                                                                                                                                                                                                                                                                                                                                                                                                                                                                                                                                                                                              |                                                                                                                                                                                                                                                                                                                                                                                                                                                                                                                                                                                                                                                                                                                                                                                                                                                       |                               |                                                                                                                                                                                                                                                                                                                                         |                                                                                                |                                                                                                                                                                    |                                                                                                                      |
|--------|-----------|---------------------------------|--------------------------|------|---|------------------------------|---------------|------------------------------------------------------------------------------------------------------------------------------------------------------------------------------------------------------------------------------------------------------------------------------------------------------------------------------------------------------------------------------------------------------------------------------------------------------------------------------------------------------------------------------------------------------------------------------|------------------------------------------------------------------------------------------------------------------------------------------------------------------------------------------------------------------------------------------------------------------------------------------------------------------------------------------------------------------------------------------------------------------------------------------------------------------------------------------------------------------------------------------------------------------------------------------------------------------------------------------------------------------------------------------------------------------------------|-------------------------------------------------------------------------------------------------------------------------------------------------------------------------------------------------------------------------------------------------------------------------------------------------------------------------------------------------------------------------------------------------------------------------------------------------------------------------------------------------------------------------------------------------------------------------------------------------------------------------------------------------------------------------------------------------------------------------------------------------------------------------------------------------------------------------------------------------------|-------------------------------|-----------------------------------------------------------------------------------------------------------------------------------------------------------------------------------------------------------------------------------------------------------------------------------------------------------------------------------------|------------------------------------------------------------------------------------------------|--------------------------------------------------------------------------------------------------------------------------------------------------------------------|----------------------------------------------------------------------------------------------------------------------|
| A3K006 | psp9      | Uncharacterized protein         | _MK(cr)LDYLGLK_          | 93   | 1 | VLDEGKMKLDYLGL               | cytosol       | cellular protein metabolic process; biosynthetic process; primary metabolic process; cellular metabolic process; organic substance biosynthetic process; cellular biosynthetic process; organic substance metabolic process; metabolic process; cellular macromolecule biosynthetic process; cellular macromolecule metabolic process; gene expression; macromolecule metabolic process; protein metabolic process; macromolecule biosynthetic process; translation; cellular process;                                                                                       | intracellular organelle; ribosome; intracellular non-membrane-bounded organelle; small ribosomal subunit; cytoplasm; intracellular organelle part; macromolecular complex; intracellular part; cell; organelle part; non-membrane-bounded organelle; organelle; ribosomal subunit; cell part; intracellular; ribonucleoprotein complex; cytoplasmic part;                                                                                                                                                                                                                                                                                                                                                                    | organic cyclic compound binding; heterocyclic compound binding; RNA binding; binding; nucleic acid binding; structural molecule activity; structural constituent of ribosome; rRNA binding;                                                                                                                                                                                                                                                                                                                                                                                                                                                                                                                                                                                                                                                           |                               |                                                                                                                                                                                                                                                                                                                                         | IPR001912; IPR002942;                                                                          | Ribosomal protein S4/S9; N-terminal; RNA-binding S4 domain;                                                                                                        |                                                                                                                      |
| B8A568 | myh2.1    | Uncharacterized protein         | _MK(cr)NSYEETLDQLETLK_   | 1487 | 1 | STELFKMKNSEETL...E...K.....  | nuclear       | intracellular organelle; intracellular non-membrane-bounded organelle; cytoskeleton part; intracellular organelle part; macromolecular complex; intracellular part; cell; actin cytoskeleton; organelle part; non-membrane-bounded organelle; organelle; cytoskeleton; cell part; intracellular; myosin complex; protein complex;                                                                                                                                                                                                                                            | ATP binding; motor activity; nucleoside phosphate binding; nucleoside binding; ion binding; hydrolase activity, acting on acid anhydrides; hydrolase activity; nucleotide binding; nucleoside-triphosphate activity; organic cyclic compound binding; heterocyclic compound binding; pyrophosphatase activity; catalytic activity; ribonucleotide binding; binding; purine ribonucleoside binding; anion binding; purine ribonucleotide binding; adenylyl ribonucleotide binding; adenylyl nucleotide binding; purine nucleoside binding; hydrolase activity, acting on acid anhydrides, in phosphorus-containing anhydrides; purine nucleotide binding; small molecule binding; purine ribonucleoside triphosphate binding; | K10352                                                                                                                                                                                                                                                                                                                                                                                                                                                                                                                                                                                                                                                                                                                                                                                                                                                | MYH; myosin heavy chain       | dre04530 Tight junction - Danio rerio (zebrafish);                                                                                                                                                                                                                                                                                      | IPR002928; IPR004009; IPR001609; IPR027417; IPR027401;                                         | Myosin tail; Myosin, N-terminal; SH3-like; Myosin head, motor domain; P-loop containing nucleoside triphosphate hydrolase; Myosin-like IQ motif-containing domain; |                                                                                                                      |
| B8A561 | myh2.2    | Uncharacterized protein         | _MK(cr)NSYEETLDQLETLK_   | 1487 | 1 | STELFKMKNSEETL...E...K.....  | nuclear       | intracellular organelle; intracellular non-membrane-bounded organelle; cytoskeleton part; intracellular organelle part; macromolecular complex; intracellular part; cell; actin cytoskeleton; organelle part; non-membrane-bounded organelle; organelle; cytoskeleton; cell part; intracellular; myosin complex; protein complex;                                                                                                                                                                                                                                            | ATP binding; motor activity; nucleoside phosphate binding; nucleoside binding; ion binding; hydrolase activity, acting on acid anhydrides; hydrolase activity; nucleotide binding; nucleoside-triphosphate activity; organic cyclic compound binding; heterocyclic compound binding; pyrophosphatase activity; catalytic activity; ribonucleotide binding; binding; purine ribonucleoside binding; anion binding; purine ribonucleotide binding; adenylyl ribonucleotide binding; adenylyl nucleotide binding; purine nucleoside binding; hydrolase activity, acting on acid anhydrides, in phosphorus-containing anhydrides; purine nucleotide binding; small molecule binding; purine ribonucleoside triphosphate binding; | K10352                                                                                                                                                                                                                                                                                                                                                                                                                                                                                                                                                                                                                                                                                                                                                                                                                                                | MYH; myosin heavy chain       | dre04530 Tight junction - Danio rerio (zebrafish);                                                                                                                                                                                                                                                                                      | IPR002928; IPR004009; IPR001609; IPR027417; IPR027401;                                         | Myosin tail; Myosin, N-terminal; SH3-like; Myosin head, motor domain; P-loop containing nucleoside triphosphate hydrolase; Myosin-like IQ motif-containing domain; |                                                                                                                      |
| Q15B5  | crygEM2-4 | Crygm2d3 protein                | _MK(cr)VTFFEDR_          | 2    | 1 | MKVTFEDR_____                | extracellular |                                                                                                                                                                                                                                                                                                                                                                                                                                                                                                                                                                              |                                                                                                                                                                                                                                                                                                                                                                                                                                                                                                                                                                                                                                                                                                                              |                                                                                                                                                                                                                                                                                                                                                                                                                                                                                                                                                                                                                                                                                                                                                                                                                                                       |                               | IPR011024; IPR001064;                                                                                                                                                                                                                                                                                                                   | Gamma-crystallin-related; Beta/gamma crystallin;                                               |                                                                                                                                                                    |                                                                                                                      |
| Q98V1  | act1b     | Actin, alpha 1, skeletal muscle | _MQK(cr)EITLAPSTMK_      | 317  | 1 | GIADRMQKEITLAP.....K.L.....  | cytoskeleton  | cytoskeleton; organelle; intracellular organelle; intracellular non-membrane-bounded organelle; cell part; intracellular; cytoplasm; intracellular part; cell; non-membrane-bounded organelle;                                                                                                                                                                                                                                                                                                                                                                               | ATP binding; nucleoside phosphate binding; nucleoside binding; ion binding; nucleotide binding; organic cyclic compound binding; heterocyclic compound binding; ribonucleoside binding; carboxydrate derivative binding; ribonucleotide binding; binding; purine ribonucleoside binding; anion binding; purine ribonucleotide binding; adenylyl ribonucleotide binding; purine nucleoside binding; purine nucleotide binding; small molecule binding; purine ribonucleoside triphosphate binding;                                                                                                                                                                                                                            | K10354                                                                                                                                                                                                                                                                                                                                                                                                                                                                                                                                                                                                                                                                                                                                                                                                                                                |                               |                                                                                                                                                                                                                                                                                                                                         |                                                                                                |                                                                                                                                                                    |                                                                                                                      |
| Q7ZV7  | actba     | Actin, cytoplasmic 1            | _MQK(cr)EITSLAPSTMK_     | 315  | 1 | GIADRMQKEITSLAP.....K.L..... | cytoskeleton  | cytoskeleton; organelle; intracellular organelle; intracellular non-membrane-bounded organelle; cell part; intracellular; cytoplasm; intracellular part; cell; non-membrane-bounded organelle;                                                                                                                                                                                                                                                                                                                                                                               | ATP binding; nucleoside phosphate binding; nucleoside binding; ion binding; nucleotide binding; organic cyclic compound binding; heterocyclic compound binding; ribonucleoside binding; carboxydrate derivative binding; ribonucleotide binding; binding; purine ribonucleoside binding; anion binding; purine ribonucleotide binding; adenylyl ribonucleotide binding; purine nucleoside binding; purine nucleotide binding; small molecule binding; purine ribonucleoside triphosphate binding;                                                                                                                                                                                                                            | K05692                                                                                                                                                                                                                                                                                                                                                                                                                                                                                                                                                                                                                                                                                                                                                                                                                                                | ACTB_G1; actin beta/gamma a 1 | dre04510 Focal adhesion - Danio rerio (zebrafish); dre04145 Phagosome - Danio rerio (zebrafish); dre04530 Tight junction - Danio rerio (zebrafish); dre05132 Salmonella infection - Danio rerio (zebrafish); dre04810 Regulation of actin cytoskeleton - Danio rerio (zebrafish); dre04520 Adherens junction - Danio rerio (zebrafish); |                                                                                                |                                                                                                                                                                    |                                                                                                                      |
| Q6PE34 | zgc65894  | Uncharacterized protein         | _MISMK(cr)EVEDEGLNIVONK_ | 324  | 1 | FRGRMSMKEVEDEGL.....K.V..... | cytosol       | cellular component biogenesis; cellular component organization; cellular macromolecular complex assembly; protein complex subunit organization; single-organism cellular process; single-organism process; microtubule-based process; macromolecular complex subunit organization; microtubule-based movement; cellular component assembly; macromolecular complex assembly; protein polymerization; movement of cell or subcellular component; protein complex biogenesis; cellular process; protein complex assembly; cellular protein complex organization or biogenesis; | intracellular organelle; microtubule; intracellular non-membrane-bounded organelle; cytoskeletal part; intracellular organelle part; cytoplasm; macromolecular complex; intracellular part; cell; organelle part; non-membrane-bounded organelle; organelle; cytoskeleton; microtubule cytoskeleton; intracellular; cell part; protein complex;                                                                                                                                                                                                                                                                                                                                                                              | nucleoside phosphate binding; nucleoside binding; ion binding; hydrolase activity, acting on acid anhydrides; hydrolase activity; nucleotide binding; nucleoside-triphosphate activity; organic cyclic compound binding; heterocyclic compound binding; ribonucleoside binding; carboxydrate derivative binding; pyrophosphatase activity; catalytic activity; ribonucleotide binding; binding; GTPase activity; purine ribonucleoside binding; anion binding; purine ribonucleotide binding; adenylyl ribonucleotide binding; purine nucleoside binding; guanylyl ribonucleotide binding; hydrolase activity, acting on acid anhydrides, in phosphorus-containing anhydrides; guanylyl nucleotide binding; structural molecule activity; GTP binding; purine nucleotide binding; small molecule binding; purine ribonucleoside triphosphate binding; | K07375                        | TUBB; tubulin beta                                                                                                                                                                                                                                                                                                                      | dre04145 Phagosome - Danio rerio (zebrafish); dre04540 Gap junction - Danio rerio (zebrafish); | IPR003008; IPR023123; IPR018316; IPR006280;                                                                                                                        | Tubulin/FtsZ; GTPase domain; Tubulin, C-terminal; Tubulin/FtsZ_2; layer sandwich domain; Tubulin/FtsZ_2, C-terminal; |
| Q1LYB7 | rpl13a    | OTTDARP00000009674              | _MVVPAALK(cr)IVR_        | 127  | 1 | MVVPAALKIVRLKPT.....K.V..... | cytosol       | cellular protein metabolic process; biosynthetic process; primary metabolic process; cellular metabolic process; organic substance biosynthetic process; cellular biosynthetic process; organic substance metabolic process; metabolic process; cellular macromolecule biosynthetic process; cellular macromolecule metabolic process; gene expression; macromolecule metabolic process; protein metabolic process; macromolecule biosynthetic process; translation; cellular process;                                                                                       | intracellular organelle; ribosome; intracellular non-membrane-bounded organelle; cytoplasm; intracellular organelle part; macromolecular complex; intracellular part; cell; organelle part; non-membrane-bounded organelle; organelle; large ribosomal subunit; ribosomal subunit; cell part; intracellular; ribonucleoprotein complex; cytoplasmic part;                                                                                                                                                                                                                                                                                                                                                                    | structural constituent of ribosome; structural molecule activity;                                                                                                                                                                                                                                                                                                                                                                                                                                                                                                                                                                                                                                                                                                                                                                                     | K02872                        | RP-L13Ae; large subunit ribosomal protein L13Ae                                                                                                                                                                                                                                                                                         | dre03010 Ribosome - Danio rerio (zebrafish);                                                   | IPR023564;                                                                                                                                                         | Ribosomal protein L13 domain;                                                                                        |

|        |            |                             |                           |      |   |                  |               |                 |                                                                                                                                                                                                                                                                                                                                                                                                                                                                                                                                                                                                                                                                                                                                                                                                                                                                                                                                                                                                                                                                                                                                                                                                                                            |                                                                                                                                                                                                                                                                                                                                                                                                                                                                                                                                                                                                                                                                                                                                                                                         |                                                                                                                                                                                                                                                                                                                                                                                                                                                                                                                                                                                                                                                                                                                                                                                                                                                                                                                                                                                                                                                                                                                                                                                                                                                                                                                                                                                                                                                                                                                                                                                                                                                                                                                                                                                                                                                                                                                                      |                                |                                                                                       |                                                                                                                                                                                                          |                                                                                                                                                                    |                                                                                                                                                                                                                 |
|--------|------------|-----------------------------|---------------------------|------|---|------------------|---------------|-----------------|--------------------------------------------------------------------------------------------------------------------------------------------------------------------------------------------------------------------------------------------------------------------------------------------------------------------------------------------------------------------------------------------------------------------------------------------------------------------------------------------------------------------------------------------------------------------------------------------------------------------------------------------------------------------------------------------------------------------------------------------------------------------------------------------------------------------------------------------------------------------------------------------------------------------------------------------------------------------------------------------------------------------------------------------------------------------------------------------------------------------------------------------------------------------------------------------------------------------------------------------|-----------------------------------------------------------------------------------------------------------------------------------------------------------------------------------------------------------------------------------------------------------------------------------------------------------------------------------------------------------------------------------------------------------------------------------------------------------------------------------------------------------------------------------------------------------------------------------------------------------------------------------------------------------------------------------------------------------------------------------------------------------------------------------------|--------------------------------------------------------------------------------------------------------------------------------------------------------------------------------------------------------------------------------------------------------------------------------------------------------------------------------------------------------------------------------------------------------------------------------------------------------------------------------------------------------------------------------------------------------------------------------------------------------------------------------------------------------------------------------------------------------------------------------------------------------------------------------------------------------------------------------------------------------------------------------------------------------------------------------------------------------------------------------------------------------------------------------------------------------------------------------------------------------------------------------------------------------------------------------------------------------------------------------------------------------------------------------------------------------------------------------------------------------------------------------------------------------------------------------------------------------------------------------------------------------------------------------------------------------------------------------------------------------------------------------------------------------------------------------------------------------------------------------------------------------------------------------------------------------------------------------------------------------------------------------------------------------------------------------------|--------------------------------|---------------------------------------------------------------------------------------|----------------------------------------------------------------------------------------------------------------------------------------------------------------------------------------------------------|--------------------------------------------------------------------------------------------------------------------------------------------------------------------|-----------------------------------------------------------------------------------------------------------------------------------------------------------------------------------------------------------------|
| B8A568 | myhz1.1    | Uncharacterized protein     | ..NAEDK(cr)AK_            | 1756 | 1 | EARNAEKAKKAITD   | .....DK.....  | nuclear         | intracellular organelle; intracellular non-membrane-bounded organelle; cytoskeleton part; intracellular organelle part; macromolecular complex; intracellular part; cell; actin cytoskeleton; organelle part; non-membrane-bounded organelle; organelle; cytoskeleton; cell part; intracellular; myosin complex; protein complex;                                                                                                                                                                                                                                                                                                                                                                                                                                                                                                                                                                                                                                                                                                                                                                                                                                                                                                          | ATP binding; motor activity; nucleoside phosphate binding; nucleoside binding; ion binding; hydrolase activity, acting on acid anhydrides; hydrolase activity; nucleotide binding; nucleoside-triphosphatase activity; organic cyclic compound binding; heterocyclic compound binding; ribonucleoside binding; carbohydrate derivative binding; pyrophosphatase activity; catalytic activity; ribonucleotide binding; binding; purine ribonucleoside binding; anion binding; purine ribonucleotide binding; adenylyl ribonucleotide binding; adenylyl nucleotide binding; purine nucleoside binding; hydrolase activity, acting on acid anhydrides, in phosphorus-containing anhydrides; purine nucleotide binding; small molecule binding; purine ribonucleoside triphosphate binding; | K10352                                                                                                                                                                                                                                                                                                                                                                                                                                                                                                                                                                                                                                                                                                                                                                                                                                                                                                                                                                                                                                                                                                                                                                                                                                                                                                                                                                                                                                                                                                                                                                                                                                                                                                                                                                                                                                                                                                                               | MYH; myosin heavy chain        | dre04530 Tight junction - Danio rerio (zebrafish);                                    | IPR002928; IPR004009; IPR001609; IPR027417; IPR027401;                                                                                                                                                   | Myosin tail; Myosin, N-terminal, SH3-like; Myosin head, motor domain; P-loop containing nucleoside triphosphate hydrolase; Myosin-like IQ motif-containing domain; |                                                                                                                                                                                                                 |
| B8A561 | myhz1.2    | Uncharacterized protein     | ..NAEDK(cr)AK_            | 1756 | 1 | EARNAEKAKKAITD   | .....DK.....  | nuclear         | intracellular organelle; intracellular non-membrane-bounded organelle; cytoskeleton part; intracellular organelle part; macromolecular complex; intracellular part; cell; actin cytoskeleton; organelle part; non-membrane-bounded organelle; organelle; cytoskeleton; cell part; intracellular; myosin complex; protein complex;                                                                                                                                                                                                                                                                                                                                                                                                                                                                                                                                                                                                                                                                                                                                                                                                                                                                                                          | ATP binding; motor activity; nucleoside phosphate binding; nucleoside binding; ion binding; hydrolase activity, acting on acid anhydrides; hydrolase activity; nucleotide binding; nucleoside-triphosphatase activity; organic cyclic compound binding; heterocyclic compound binding; ribonucleoside binding; carbohydrate derivative binding; pyrophosphatase activity; catalytic activity; ribonucleotide binding; binding; purine ribonucleoside binding; anion binding; purine ribonucleotide binding; adenylyl ribonucleotide binding; adenylyl nucleotide binding; purine nucleoside binding; hydrolase activity, acting on acid anhydrides, in phosphorus-containing anhydrides; purine nucleotide binding; small molecule binding; purine ribonucleoside triphosphate binding; | K10352                                                                                                                                                                                                                                                                                                                                                                                                                                                                                                                                                                                                                                                                                                                                                                                                                                                                                                                                                                                                                                                                                                                                                                                                                                                                                                                                                                                                                                                                                                                                                                                                                                                                                                                                                                                                                                                                                                                               | MYH; myosin heavy chain        | dre04530 Tight junction - Danio rerio (zebrafish);                                    | IPR002928; IPR004009; IPR001609; IPR027417; IPR027401;                                                                                                                                                   | Myosin tail; Myosin, N-terminal, SH3-like; Myosin head, motor domain; P-loop containing nucleoside triphosphate hydrolase; Myosin-like IQ motif-containing domain; |                                                                                                                                                                                                                 |
| Q642Z0 | atp2a1     | Calcium-transporting ATPase | ..NAESAIALK(cr)EYEPENMGK_ | 120  | 1 | ESAIKALKEYEPENMG |               | plasma membrane | nucleoside metabolic process; purine nucleoside metabolic process; purine ribonucleoside monophosphate metabolic process; nucleotide metabolic process; single-organism process; purine ribonucleoside biosynthetic process; nucleoside biosynthetic process; biosynthetic process; ribonucleoside monophosphate biosynthetic process; cellular metabolic process; phosphate-containing compound metabolic process; ribose phosphate biosynthetic process; metabolic process; carbohydrate derivative biosynthetic process; nucleoside phosphate metabolic process; ribose phosphate metabolic process; purine nucleoside triphosphate biosynthetic process; heterocycle biosynthetic process; purine ribonucleoside triphosphate biosynthetic process; small molecule metabolic process; ATP biosynthetic process; single-organism cellular process; purine ribonucleoside triphosphate metabolic process; organic cyclic compound metabolic process; purine-containing compound metabolic process; ribonucleoside triphosphate metabolic process; purine ribonucleoside monophosphate biosynthetic process; purine nucleoside biosynthetic process; organophosphate biosynthetic process; ribonucleoside triphosphate metabolic process; | intrinsic component of membrane; membrane; integral component of membrane; membrane part;                                                                                                                                                                                                                                                                                                                                                                                                                                                                                                                                                                                                                                                                                               | ATPase activity, coupled to transmembrane movement of ions; nucleoside phosphate binding; primary active transmembrane transporter activity; substrate-specific transporter activity; hydrolase activity, acting on acid anhydrides; hydrolase activity; substrate-specific transmembrane transporter activity; ATPase activity; organic cyclic compound binding; heterocyclic compound binding; metal ion transmembrane transporter activity; pyrophosphatase activity; cation-transporting ATPase activity; catalytic activity; ribonucleotide binding; ATPase activity, coupled to movement of substances; binding; purine ribonucleoside binding; cation binding; hydrolase activity, acting on acid anhydrides, catalyzing transmembrane movement of substances; anion binding; adenylyl ribonucleotide binding; adenylyl nucleotide binding; inorganic cation transmembrane transporter activity; hydrolase activity, acting on acid anhydrides, in phosphorus-containing anhydrides; transporter activity; purine nucleoside binding; purine ribonucleoside triphosphate binding; active transmembrane transporter activity; ATP binding; ion transmembrane transporter activity; ion binding; nucleoside binding; nucleotide binding; nucleoside-triphosphatase activity; ribonucleoside binding; P-P-bond-hydrolysis-driven transmembrane transporter activity; ATPase activity, coupled to transmembrane movement of ions, phosphorylative mechanism; divalent inorganic cation transmembrane transporter activity; carbohydrate derivative binding; calcium-transporting ATPase activity; ATPase activity, coupled to transmembrane movement of substances; ATPase activity, coupled; metal ion binding; calcium ion transmembrane transporter activity; purine ribonucleoside binding; purine nucleoside binding; cation transmembrane transporter activity; transmembrane transporter activity; small molecule binding; | K05853                         | ATP2A; Ca2+ transportin g ATPase, sarcoplasmic mic/endoplasmic reticulum [EC:3.6.3.8] | dre04020 Calcium signaling pathway - Danio rerio (zebrafish);                                                                                                                                            | IPR023298; IPR004014; IPR023299; IPR008250; IPR006068; IPR023214;                                                                                                  | P-type ATPase, transmembrane domain; Cation-transporting P-type ATPase, N-terminal; P-type ATPase, cytoplasmic domain; N-type ATPase, A domain; Cation-transporting P-type ATPase, C-terminal; HAD-like domain; |
| F1QFC0 | hspa9      | Uncharacterized protein     | ..NAK(cr)VLENAEGAR_       | 79   | 1 | VMDGKNAKVLNAEG   | .....K.L..... | mitochondria    | protein folding; metabolic process; cellular protein metabolic process; cellular macromolecule metabolic process; macromolecule metabolic process; protein metabolic process; primary metabolic process; cellular process; cellular metabolic process; organic substance metabolic process;                                                                                                                                                                                                                                                                                                                                                                                                                                                                                                                                                                                                                                                                                                                                                                                                                                                                                                                                                | ATP binding; nucleoside phosphate binding; nucleoside binding; ion binding; hydrolase activity; organic cyclic compound binding; heterocyclic compound binding; ribonucleoside binding; carbohydrate derivative binding; ribonucleotide binding; binding; purine ribonucleoside binding; anion binding; purine ribonucleotide binding; adenylyl ribonucleotide binding; adenylyl nucleotide binding; purine nucleoside binding; purine nucleotide binding; small molecule binding; purine ribonucleoside triphosphate binding;                                                                                                                                                                                                                                                          | K04043                                                                                                                                                                                                                                                                                                                                                                                                                                                                                                                                                                                                                                                                                                                                                                                                                                                                                                                                                                                                                                                                                                                                                                                                                                                                                                                                                                                                                                                                                                                                                                                                                                                                                                                                                                                                                                                                                                                               | dnAK; molecular chaperone DnaK | dre03018 RNA degradation - Danio rerio (zebrafish);                                   | IPR029048; IPR029047;                                                                                                                                                                                    | Heat shock protein 70kD, C-terminal domain; Heat shock protein 70kD, peptide-binding domain;                                                                       |                                                                                                                                                                                                                 |
| Q29RA2 | zgc:136908 | Uncharacterized protein     | ..NAPAIIDELDAIAPK(cr)R_   | 314  | 1 | ELDAIAPKREKTHGE  | .....K.E..... | cytosol         |                                                                                                                                                                                                                                                                                                                                                                                                                                                                                                                                                                                                                                                                                                                                                                                                                                                                                                                                                                                                                                                                                                                                                                                                                                            | ATP binding; nucleoside phosphate binding; nucleoside binding; ion binding; hydrolase activity, acting on acid anhydrides; hydrolase activity; nucleotide binding; nucleoside-triphosphatase activity; organic cyclic compound binding; heterocyclic compound binding; ribonucleoside binding; carbohydrate derivative binding; pyrophosphatase activity; catalytic activity; ribonucleotide binding; binding; purine ribonucleoside binding; anion binding; purine ribonucleotide binding; adenylyl ribonucleotide binding; adenylyl nucleotide binding; purine nucleoside binding; hydrolase activity, acting on acid anhydrides, in phosphorus-containing anhydrides; purine nucleotide binding; small molecule binding; purine ribonucleoside triphosphate binding;                 |                                                                                                                                                                                                                                                                                                                                                                                                                                                                                                                                                                                                                                                                                                                                                                                                                                                                                                                                                                                                                                                                                                                                                                                                                                                                                                                                                                                                                                                                                                                                                                                                                                                                                                                                                                                                                                                                                                                                      |                                | IPR029067; IPR003959; IPR003593; IPR009010; IPR004201; IPR027417; IPR003338;          | CDC48 domain 2-like; ATPase, AAA-type, core; AAA+ ATPase domain; Aspartate decarboxylase-like domain; CDC48, domain 2; P-loop containing nucleoside triphosphate hydrolase; CDC48, N-terminal subdomain; |                                                                                                                                                                    |                                                                                                                                                                                                                 |
| B8A568 | myhz1.1    | Uncharacterized protein     | ..NFDK(cr)VLAEWK_         | 1453 | 1 | KKQRNFDKVLAEWKQ  | .....DK.....  | nuclear         | intracellular organelle; intracellular non-membrane-bounded organelle; cytoskeleton part; intracellular organelle part; macromolecular complex; intracellular part; cell; actin cytoskeleton; organelle part; non-membrane-bounded organelle; organelle; cytoskeleton; cell part; intracellular; myosin complex; protein complex;                                                                                                                                                                                                                                                                                                                                                                                                                                                                                                                                                                                                                                                                                                                                                                                                                                                                                                          | ATP binding; motor activity; nucleoside phosphate binding; nucleoside binding; ion binding; hydrolase activity, acting on acid anhydrides; hydrolase activity; nucleotide binding; nucleoside-triphosphatase activity; organic cyclic compound binding; heterocyclic compound binding; ribonucleoside binding; carbohydrate derivative binding; pyrophosphatase activity; catalytic activity; ribonucleotide binding; binding; purine ribonucleoside binding; anion binding; purine ribonucleotide binding; adenylyl ribonucleotide binding; adenylyl nucleotide binding; purine nucleoside binding; hydrolase activity, acting on acid anhydrides, in phosphorus-containing anhydrides; purine nucleotide binding; small molecule binding; purine ribonucleoside triphosphate binding; | K10352                                                                                                                                                                                                                                                                                                                                                                                                                                                                                                                                                                                                                                                                                                                                                                                                                                                                                                                                                                                                                                                                                                                                                                                                                                                                                                                                                                                                                                                                                                                                                                                                                                                                                                                                                                                                                                                                                                                               | MYH; myosin heavy chain        | dre04530 Tight junction - Danio rerio (zebrafish);                                    | IPR002928; IPR004009; IPR001609; IPR027417; IPR027401;                                                                                                                                                   | Myosin tail; Myosin, N-terminal, SH3-like; Myosin head, motor domain; P-loop containing nucleoside triphosphate hydrolase; Myosin-like IQ motif-containing domain; |                                                                                                                                                                                                                 |

|        |          |                                      |                     |      |   |                 |               |                 |                                                                                                                                                                                                                                                                                                                                                                                                                                                                                                                                                                                                                                                                                                                                                                                                                                                                                                                                                                                                                                                                         |                                                                                                                                                                                                                                                                                                                                                                                                                                                                                                                                                                                                                                                                                                                                                                                         |        |                                                         |                                                                                                                                                                                                                                                                                                                                                                                       |                                                           |                                                                                                                                                                                  |
|--------|----------|--------------------------------------|---------------------|------|---|-----------------|---------------|-----------------|-------------------------------------------------------------------------------------------------------------------------------------------------------------------------------------------------------------------------------------------------------------------------------------------------------------------------------------------------------------------------------------------------------------------------------------------------------------------------------------------------------------------------------------------------------------------------------------------------------------------------------------------------------------------------------------------------------------------------------------------------------------------------------------------------------------------------------------------------------------------------------------------------------------------------------------------------------------------------------------------------------------------------------------------------------------------------|-----------------------------------------------------------------------------------------------------------------------------------------------------------------------------------------------------------------------------------------------------------------------------------------------------------------------------------------------------------------------------------------------------------------------------------------------------------------------------------------------------------------------------------------------------------------------------------------------------------------------------------------------------------------------------------------------------------------------------------------------------------------------------------------|--------|---------------------------------------------------------|---------------------------------------------------------------------------------------------------------------------------------------------------------------------------------------------------------------------------------------------------------------------------------------------------------------------------------------------------------------------------------------|-----------------------------------------------------------|----------------------------------------------------------------------------------------------------------------------------------------------------------------------------------|
| B8A561 | myh2.1.2 | Uncharacterized protein              | _NFDK(cr)VLAEWK_    | 1453 | 1 | KKQRNFVKVLAEWKQ | .....DK.....  | nuclear         | intracellular organelle; intracellular non-membrane-bounded organelle; cytoskeletal part; intracellular organelle part; macromolecular complex; intracellular part; cell; actin cytoskeleton; organelle part; non-membrane-bounded organelle; organelle; cytoskeleton; cell part; intracellular; myosin complex; protein complex;                                                                                                                                                                                                                                                                                                                                                                                                                                                                                                                                                                                                                                                                                                                                       | ATP binding; motor activity; nucleoside phosphate binding; nucleoside binding; ion binding; hydrolase activity, acting on acid anhydrides; hydrolase activity; nucleotide binding; nucleoside-triphosphatase activity; organic cyclic compound binding; heterocyclic compound binding; ribonucleoside binding; carbohydrate derivative binding; pyrophosphatase activity; catalytic activity; ribonucleoside binding; binding; purine ribonucleoside binding; anion binding; purine ribonucleoside binding; adenylyl ribonucleoside binding; adenylyl nucleotide binding; purine nucleoside binding; hydrolase activity, acting on acid anhydrides, in phosphorus-containing anhydrides; purine nucleotide binding; small molecule binding; purine ribonucleoside triphosphate binding; | K10352 | MYH; myosin heavy chain                                 | dre04630 Tight junction - Danio rerio (zebrafish);                                                                                                                                                                                                                                                                                                                                    | IPR002928; IPR004009; IPR001609; IPR027417; IPR027401;    | Myosin tail; Myosin, N-terminal, SH3-like; Myosin head, motor domain; P-loop containing nucleoside triphosphate hydrolase; Myosin-like IQ motif-containing domain;               |
| Q98V0  | pvalb2   | Parvalbumin-2                        | _NFFAK(cr)VGLSAK_   | 33   | 1 | NYKNFFAKVGLSAKS |               | cytosol         |                                                                                                                                                                                                                                                                                                                                                                                                                                                                                                                                                                                                                                                                                                                                                                                                                                                                                                                                                                                                                                                                         | cation binding; metal ion binding; calcium ion binding; binding; ion binding;                                                                                                                                                                                                                                                                                                                                                                                                                                                                                                                                                                                                                                                                                                           |        |                                                         | IPR002048; IPR011992;                                                                                                                                                                                                                                                                                                                                                                 | EF-hand domain; EF-hand domain pair;                      |                                                                                                                                                                                  |
| Q0D2W2 | tnni2a.4 | Uncharacterized protein              | NIEDK(cr)AGMDGR     | 162  | 1 | WRKNIEDKAGMDGRK | .....DK.....  | mitochondria    |                                                                                                                                                                                                                                                                                                                                                                                                                                                                                                                                                                                                                                                                                                                                                                                                                                                                                                                                                                                                                                                                         |                                                                                                                                                                                                                                                                                                                                                                                                                                                                                                                                                                                                                                                                                                                                                                                         |        |                                                         |                                                                                                                                                                                                                                                                                                                                                                                       |                                                           |                                                                                                                                                                                  |
| Q71N41 | gant     | Guanidinoacetate N-methyltransferase | _NK(cr)YDNIDK_      | 179  | 1 | WGELLNKYDNIDKM  | .E...K.....   | cytosol         | cellular amino acid biosynthetic process; organic acid biosynthetic process; single-organism biosynthetic process; small molecule metabolic process; single-organism cellular process; cellular modified amino acid biosynthetic process; nitrogen compound metabolic process; single-organism process; biosynthetic process; creatine metabolic process; alpha-amino acid metabolic process; primary metabolic process; organonitrogen compound biosynthetic process; cellular metabolic process; organic substance biosynthetic process; cellular biosynthetic process; organic substance metabolic process; carboxylic acid biosynthetic process; metabolic process; cellular amino acid metabolic process; cellular modified amino acid metabolic process; single-organism metabolic process; alpha-amino acid biosynthetic process; carboxylic acid metabolic process; small molecule biosynthetic process; organic acid metabolic process; cellular process; oxoacid metabolic process; creatine biosynthetic process; organonitrogen compound metabolic process; | transferase activity, transferring one-carbon groups; S-adenosylmethionine-dependent methyltransferase activity; methyltransferase activity; guanidinoacetate N-methyltransferase activity; catalytic activity; transferase activity;                                                                                                                                                                                                                                                                                                                                                                                                                                                                                                                                                   | K00542 | GAMT; guanidinoacetate N-methyltransferase [EC:2.1.1.2] | dre00330 Arginine and proline metabolism - Danio rerio (zebrafish); dre01100 Metabolic pathways - Danio rerio (zebrafish); dre00260 Glycine, serine and threonine metabolism - Danio rerio (zebrafish);                                                                                                                                                                               | IPR026480; IPR029063;                                     | Arginine N-methyltransferase 2-like domain; S-adenosyl-L-methionine-dependent methyltransferase-like;                                                                            |
| I3ITD9 | pabpc1b  | Uncharacterized protein              | _NLDK(cr)SIDNK_     | 108  | 1 | IFIKNLKSIDNKAL  | .....DK.....  | cytosol,nuclear |                                                                                                                                                                                                                                                                                                                                                                                                                                                                                                                                                                                                                                                                                                                                                                                                                                                                                                                                                                                                                                                                         | organic cyclic compound binding; heterocyclic compound binding; nucleoside phosphate binding; binding; nucleic acid binding; nucleotide binding; small molecule binding;                                                                                                                                                                                                                                                                                                                                                                                                                                                                                                                                                                                                                |        |                                                         | IPR000504; IPR012677;                                                                                                                                                                                                                                                                                                                                                                 | rRNA recognition motif domain; Nucleotide-binding, alpha- |                                                                                                                                                                                  |
| Q7T334 | mdh2     | Malate dehydrogenase                 | _NLGLGK(cr)LSAFEEK_ | 306  | 1 | EKNLGLGKLSAFEEK |               | mitochondria    | tricarboxylic acid metabolic process; dicarboxylic acid metabolic process; oxidation-reduction process; small molecule metabolic process; tricarboxylic acid cycle; single-organism cellular process; single-organism process; primary metabolic process; carbohydrate metabolic process; cellular respiration; cellular metabolic process; organic substance metabolic process; citrate metabolic process; metabolic process; generation of precursor metabolites and energy; cellular carbohydrate metabolic process; aerobic respiration; single-organism metabolic process; energy derivation by oxidation of organic compounds; malate metabolic process; carboxylic acid metabolic process; organic acid metabolic process; cellular process; oxoacid metabolic process;                                                                                                                                                                                                                                                                                          | organic cyclic compound binding; heterocyclic compound binding; oxidoreductase activity, acting on CH-OH group of donors, NAD or NADP as acceptor; nucleoside phosphate binding; catalytic activity; binding; nucleotide binding; malate dehydrogenase activity; L-malate dehydrogenase activity; small molecule binding; oxidoreductase activity;                                                                                                                                                                                                                                                                                                                                                                                                                                      | K00026 | MDH2; malate dehydrogenase [EC:1.1.1.37]                | dre01200 Carbon metabolism - Danio rerio (zebrafish); dre01100 Metabolic pathways - Danio rerio (zebrafish); dre00620 Pyruvate metabolism - Danio rerio (zebrafish); dre00630 Glyoxylate and dicarboxylate metabolism - Danio rerio (zebrafish); dre00020 Citrate cycle (TCA cycle) - Danio rerio (zebrafish); dre00270 Cysteine and methionine metabolism - Danio rerio (zebrafish); | IPR022383; IPR016040; IPR001236; IPR015955;               | Lactate/malate dehydrogenase, C-terminal; NAD(P)-binding domain; Lactate/malate dehydrogenase, N-terminal; Lactate dehydrogenase/glyoxylate dehydrogenase, family 4, C-terminal; |
| E9QF19 | pgk1     | Phosphoglycerate kinase              | _NLLGK(cr)DVQFLK_   | 100  | 1 | ELKNLLGKDVQFLKD | .....K.V..... | cytosol         | single-organism carbohydrate catabolic process; glycolytic process; single-organism catabolic process; small molecule metabolic process; single-organism cellular process; single-organism process; carbohydrate metabolic process; primary metabolic process; cellular metabolic process; organic substance metabolic process; carbohydrate catabolic process; single-organism carbohydrate metabolic process; organic substance catabolic process; metabolic process; pyruvate metabolic process; generation of precursor metabolites and energy; single-organism metabolic process; carboxylic acid metabolic process; monocarboxylic acid metabolic process; organic acid metabolic process; cellular process; catabolic process; oxoacid metabolic process;                                                                                                                                                                                                                                                                                                        | phosphotransferase activity, carboxyl group as acceptor; kinase activity; catalytic activity; transferase activity; phosphoglycerate kinase activity; transferase activity, transferring phosphorus-containing groups;                                                                                                                                                                                                                                                                                                                                                                                                                                                                                                                                                                  |        |                                                         | IPR015824;                                                                                                                                                                                                                                                                                                                                                                            | Phosphoglycerate kinase, N-terminal;                      |                                                                                                                                                                                  |
| F1R431 | -        | Uncharacterized protein              | _NLQK(cr)TVK_       | 603  | 1 | QTSKNLQKTVKLPRL | .....K.V..... | cytosol         |                                                                                                                                                                                                                                                                                                                                                                                                                                                                                                                                                                                                                                                                                                                                                                                                                                                                                                                                                                                                                                                                         |                                                                                                                                                                                                                                                                                                                                                                                                                                                                                                                                                                                                                                                                                                                                                                                         | K05768 | GSN; gelsolin                                           | dre04810 Regulation of actin cytoskeleton - Danio rerio (zebrafish);                                                                                                                                                                                                                                                                                                                  | IPR029006; IPR007123;                                     | ADF-H/Gelsolin-like domain; Gelsolin-like domain;                                                                                                                                |





|        |         |                               |                          |      |   |                              |               |                                                                                                                                                                                                                                                                                                                                                                                                                                                                                                                                                                                                                                                                                                                                                                                                                                                                                                                                                                                                                                                                                                                                                                                                                                                                                                                                                                                                                                                                                                                                                                                                                   |                                                                                                                                                                                                                                                                                                                                                                                                                                                                                                                                                                                                                                                                                                                                                                                       |        |                                                                                                                                                                                                                                                                                                                                                                                                                                                                                         |                                                                                                                                                                           |
|--------|---------|-------------------------------|--------------------------|------|---|------------------------------|---------------|-------------------------------------------------------------------------------------------------------------------------------------------------------------------------------------------------------------------------------------------------------------------------------------------------------------------------------------------------------------------------------------------------------------------------------------------------------------------------------------------------------------------------------------------------------------------------------------------------------------------------------------------------------------------------------------------------------------------------------------------------------------------------------------------------------------------------------------------------------------------------------------------------------------------------------------------------------------------------------------------------------------------------------------------------------------------------------------------------------------------------------------------------------------------------------------------------------------------------------------------------------------------------------------------------------------------------------------------------------------------------------------------------------------------------------------------------------------------------------------------------------------------------------------------------------------------------------------------------------------------|---------------------------------------------------------------------------------------------------------------------------------------------------------------------------------------------------------------------------------------------------------------------------------------------------------------------------------------------------------------------------------------------------------------------------------------------------------------------------------------------------------------------------------------------------------------------------------------------------------------------------------------------------------------------------------------------------------------------------------------------------------------------------------------|--------|-----------------------------------------------------------------------------------------------------------------------------------------------------------------------------------------------------------------------------------------------------------------------------------------------------------------------------------------------------------------------------------------------------------------------------------------------------------------------------------------|---------------------------------------------------------------------------------------------------------------------------------------------------------------------------|
| F1QR4  | -       | Uncharacterized protein       | _NSYEEVLDQLETMK(cr)_     | 1502 | 1 | LQQLTKMKRENKLNQ .....K.E.... | cytosol       | <p>cellular component biogenesis; muscle cell development; single-multicellular organism process; cellular component organization; muscle system process; cellular developmental process; cellular component morphogenesis; single-organism process; actin filament organization; cell development; anatomical structure morphogenesis; cell differentiation; actin cytoskeleton organization; muscle contraction; cellular component assembly; organelle assembly; macromolecular complex assembly; myofibril assembly; musculoskeletal movement; slow-twitch skeletal muscle fiber contraction; muscle structure development; cytoskeleton organization; anatomical structure formation involved in morphogenesis; cellular process; striated muscle myosin thick filament assembly; protein complex assembly; cellular protein complex assembly; skeletal muscle thin filament assembly; developmental process; cellular macromolecular complex assembly; striated muscle cell differentiation; actomyosin structure organization; system process; protein complex subunit organization; multicellular organismal movement; single-organism cellular process; cellular component assembly involved in morphogenesis; striated muscle contraction; muscle filament</p> <p>intracellular organelle; intracellular non-membrane-bounded organelle; cytoskeleton part; intracellular organelle part; macromolecular complex; intracellular part; cell; actin cytoskeleton; organelle part; non-membrane-bounded organelle; organelle; cytoskeleton; cell part; intracellular; myosin complex; protein complex;</p> | <p>ATP binding; motor activity; nucleoside phosphate binding; nucleoside binding; ion binding; hydrolase activity, acting on acid anhydrides; hydrolase activity; nucleotide binding; nucleoside-triphosphatase activity; organic cyclic compound binding; heterocyclic compound binding; ribonucleoside binding; carbohydrate derivative binding; pyrophosphatase activity; catalytic activity; ribonucleoside binding; purine ribonucleoside binding; anion binding; purine ribonucleoside binding; adenylyl ribonucleoside binding; adenylyl nucleotide binding; purine nucleoside binding; hydrolase activity, acting on acid anhydrides, in phosphorus-containing anhydrides; purine nucleotide binding; small molecule binding; purine ribonucleoside triphosphate binding;</p> | K10352 | <p>MYH;<br/>myosin heavy chain</p> <p>dre04530 Tight junction - Danio rerio (zebrafish);</p>                                                                                                                                                                                                                                                                                                                                                                                            | <p>Myosin tail; Myosin, N-terminal, SH3-like; P-loop containing nucleoside triphosphate hydrolase; Myosin head, motor domain; Myosin-like IQ motif-containing domain;</p> |
| E7FAR9 | -       | Isoctate dehydrogenase [NADP] | _NTLTK(cr)AYDGR_         | 252  | 1 | STKNLTKAYDGRFK               | mitochondrion | <p>tricarboxylic acid metabolic process; oxidation-reduction process; small molecule metabolic process; tricarboxylic acid cycle; single-organism cellular process; single-organism process; isocitrate metabolic process; primary metabolic process; cellular respiration; cellular metabolic process; organic substance metabolic process; citrate metabolic process; metabolic process; generation of precursor metabolites and energy; aerobic respiration; single-organism metabolic process; energy derivation by oxidation of organic compounds; carboxylic acid metabolic process; organic acid metabolic process; cellular process; oxoacid metabolic process;</p>                                                                                                                                                                                                                                                                                                                                                                                                                                                                                                                                                                                                                                                                                                                                                                                                                                                                                                                                       | <p>magnesium ion binding; nucleoside phosphate binding; ion binding; isocitrate dehydrogenase activity; nucleotide binding; cofactor binding; oxidoreductase activity; oxidoreductase activity, acting on CH-OH group of donors; heterocyclic compound binding; organic cyclic compound binding; oxidoreductase activity, acting on the CH-OH group of donors, NAD or NADP as acceptor; catalytic activity; NAD binding; binding; isocitrate dehydrogenase (NADP+) activity; metal ion binding; cation binding; small molecule binding; coenzyme binding;</p>                                                                                                                                                                                                                         | K00031 | <p>IDH1;<br/>isocitrate dehydrogenase [EC:1.1.1.42]</p> <p>dre01210 2-Oxocarboxylic acid metabolism - Danio rerio (zebrafish); dre01230 Biosynthesis of amino acids - Danio rerio (zebrafish); dre01200 Carbon metabolism - Danio rerio (zebrafish); dre01100 Metabolic pathways - Danio rerio (zebrafish); dre00480 Glutathione metabolism - Danio rerio (zebrafish); dre04146 Peroxisome - Danio rerio (zebrafish); dre00020 Citrate cycle (TCA cycle) - Danio rerio (zebrafish);</p> | <p>Isopropylmalate dehydrogenase-like domain;</p>                                                                                                                         |
| Q1LYB7 | rp13a   | OTTDARP00000009674            | _NVESK(cr)JAVYDVLK_      | 190  | 1 | AEKNVESKJAVYDVT              | cytosol       | <p>cellular protein metabolic process; biosynthetic process; primary metabolic process; cellular metabolic process; organic substance biosynthetic process; cellular biosynthetic process; organic substance metabolic process; metabolic process; cellular macromolecule biosynthetic process; cellular macromolecule metabolic process; gene expression; macromolecule metabolic process; protein metabolic process; macromolecule biosynthetic process; translation; cellular process;</p>                                                                                                                                                                                                                                                                                                                                                                                                                                                                                                                                                                                                                                                                                                                                                                                                                                                                                                                                                                                                                                                                                                                     | <p>intracellular organelle; ribosome; intracellular non-membrane-bounded organelle; cytoplasm; intracellular organelle part; macromolecular complex; intracellular part; cell; organelle part; non-membrane-bounded organelle; organelle; large ribosomal subunit; ribosomal subunit; cell part; intracellular; ribonucleoprotein complex; cytoplasmic part;</p>                                                                                                                                                                                                                                                                                                                                                                                                                      | K02872 | <p>RP-L13Ae;<br/>large subunit ribosomal protein L13Ae</p> <p>dre03010 Ribosome - Danio rerio (zebrafish);</p>                                                                                                                                                                                                                                                                                                                                                                          | <p>Ribosomal protein L13 domain;</p>                                                                                                                                      |
| B8A561 | myhz1.2 | Uncharacterized protein       | _NVQAQLK(cr)DAQLHLDDAVR_ | 1653 | 1 | RNVQAQLKDAQLHL               | nuclear       | <p>intracellular organelle; intracellular non-membrane-bounded organelle; cytoskeleton part; intracellular organelle part; macromolecular complex; intracellular part; cell; actin cytoskeleton; organelle part; non-membrane-bounded organelle; organelle; cytoskeleton; cell part; intracellular; myosin complex; protein complex;</p>                                                                                                                                                                                                                                                                                                                                                                                                                                                                                                                                                                                                                                                                                                                                                                                                                                                                                                                                                                                                                                                                                                                                                                                                                                                                          | <p>ATP binding; motor activity; nucleoside phosphate binding; nucleoside binding; ion binding; hydrolase activity, acting on acid anhydrides; hydrolase activity; nucleotide binding; nucleoside-triphosphatase activity; organic cyclic compound binding; heterocyclic compound binding; ribonucleoside binding; carbohydrate derivative binding; pyrophosphatase activity; catalytic activity; ribonucleoside binding; purine ribonucleoside binding; anion binding; purine ribonucleoside binding; adenylyl ribonucleoside binding; adenylyl nucleotide binding; purine nucleoside binding; hydrolase activity, acting on acid anhydrides, in phosphorus-containing anhydrides; purine nucleotide binding; small molecule binding; purine ribonucleoside triphosphate binding;</p> | K10352 | <p>MYH;<br/>myosin heavy chain</p> <p>dre04530 Tight junction - Danio rerio (zebrafish);</p>                                                                                                                                                                                                                                                                                                                                                                                            | <p>Myosin tail; Myosin, N-terminal, SH3-like; Myosin head, motor domain; P-loop containing nucleoside triphosphate hydrolase; Myosin-like IQ motif-containing domain;</p> |
| Q803X7 | nap111  | Nap111 protein                | _NVTLK(cr)TIK_           | 263  | 1 | KGKNVTLTKIKKQK .....K.L....  | nuclear       | <p>cellular component biogenesis; cellular component organization; nucleosome organization; cellular macromolecular complex assembly; chromatin assembly or disassembly; protein complex subunit organization; macromolecular complex subunit organization; protein-DNA complex assembly; DNA packaging; nucleosome assembly; chromosome organization; cellular component assembly; macromolecular complex assembly; organelle organization; chromatin organization; protein complex biogenesis; chromatin assembly; cellular process; protein complex assembly; cellular component organization or biogenesis; protein-DNA complex subunit organization; DNA conformation change;</p>                                                                                                                                                                                                                                                                                                                                                                                                                                                                                                                                                                                                                                                                                                                                                                                                                                                                                                                            | <p>organelle; intracellular membrane-bounded organelle; intracellular organelle; nucleus; cell part; intracellular; intracellular part; membrane-bounded organelle; cell;</p>                                                                                                                                                                                                                                                                                                                                                                                                                                                                                                                                                                                                         | K11279 |                                                                                                                                                                                                                                                                                                                                                                                                                                                                                         |                                                                                                                                                                           |

|        |                 |                                   |                      |      |   |                                |                 |                                                                                                                                                                                                                                                                                                                                                                                                                                                                                                                                                                                                                                                |                                                                                                                                                                                                                                                                                                                                                                                                                                                                   |                                                                                                                                                                                                                                                                                                                                                                                                                                                                                                                                                                                                                                                                                                                                                                                                                                                                                                                                                                                                                                 |        |                                                                                               |                                                                                                                                                                                                                                                                                                                                                                                                             |
|--------|-----------------|-----------------------------------|----------------------|------|---|--------------------------------|-----------------|------------------------------------------------------------------------------------------------------------------------------------------------------------------------------------------------------------------------------------------------------------------------------------------------------------------------------------------------------------------------------------------------------------------------------------------------------------------------------------------------------------------------------------------------------------------------------------------------------------------------------------------------|-------------------------------------------------------------------------------------------------------------------------------------------------------------------------------------------------------------------------------------------------------------------------------------------------------------------------------------------------------------------------------------------------------------------------------------------------------------------|---------------------------------------------------------------------------------------------------------------------------------------------------------------------------------------------------------------------------------------------------------------------------------------------------------------------------------------------------------------------------------------------------------------------------------------------------------------------------------------------------------------------------------------------------------------------------------------------------------------------------------------------------------------------------------------------------------------------------------------------------------------------------------------------------------------------------------------------------------------------------------------------------------------------------------------------------------------------------------------------------------------------------------|--------|-----------------------------------------------------------------------------------------------|-------------------------------------------------------------------------------------------------------------------------------------------------------------------------------------------------------------------------------------------------------------------------------------------------------------------------------------------------------------------------------------------------------------|
| Q05AK8 | sich73-368 24.9 | Histone H2B                       | _PEPAK(cr)TAPK_      | 6    | 1 | ___MPEPAKTPAKKGS               | nuclear         | cellular component biogenesis; cellular component organization; nucleosome organization; cellular macromolecular complex assembly; chromatin assembly or disassembly; protein complex subunit organization; macromolecular complex subunit organization; protein-DNA complex assembly; DNA packaging; nucleosome assembly; chromosome organization; cellular component assembly; organelle organization; chromatin organization; protein complex biogenesis; chromatin assembly; cellular process; protein complex assembly; cellular component organization or biogenesis; protein-DNA complex subunit organization; DNA conformation change; | intracellular organelle; intracellular non-membrane-bounded organelle; intracellular organelle part; macromolecular complex; intracellular part; cell; organelle part; DNA bending complex; chromosomal part; nucleosome; non-membrane-bounded organelle; intracellular membrane-bounded organelle; organelle; nucleus; chromatin; cell part; intracellular; chromosome; membrane-bounded organelle; protein complex; protein-DNA complex; DNA packaging complex; | organic cyclic compound binding; heterocyclic compound binding; DNA binding; binding; nucleic acid binding;                                                                                                                                                                                                                                                                                                                                                                                                                                                                                                                                                                                                                                                                                                                                                                                                                                                                                                                     | K11252 | IPR009072; Histone-fold; IPR007125; Histone core;                                             |                                                                                                                                                                                                                                                                                                                                                                                                             |
| Q6PBW7 | rps19           | Ribosomal protein S19             | _PGGVTVK(cr)DNQGVFR_ | 8    | 1 | MPGGVTVKD VNGQEF .....K.V..... | cytosol         | cellular protein metabolic process; biosynthetic process; primary metabolic process; cellular metabolic process; organic substance biosynthetic process; cellular biosynthetic process; organic substance metabolic process; metabolic process; cellular macromolecule biosynthetic process; cellular macromolecule metabolic process; gene expression; macromolecule metabolic process; protein metabolic process; macromolecule biosynthetic process; translation; cellular process;                                                                                                                                                         | ribosome; organelle; intracellular organelle; intracellular non-membrane-bounded organelle; cell part; intracellular; cytoplasm; macromolecular complex; intracellular part; cell; ribonucleoprotein complex; cytoplasmic part; non-membrane-bounded organelle;                                                                                                                                                                                                   | structural constituent of ribosome; structural molecule activity;                                                                                                                                                                                                                                                                                                                                                                                                                                                                                                                                                                                                                                                                                                                                                                                                                                                                                                                                                               | K02966 | RP-S19e; small subunit ribosomal protein S19e<br>dre03010 Ribosome - Danio rerio (zebrafish); |                                                                                                                                                                                                                                                                                                                                                                                                             |
| F1QTL9 | hnmpa0b         | Uncharacterized protein           | _PHVVDGK(cr)NVEVK_   | 76   | 1 | RPHVVDGKN VVKRA .....K.V.....  | nuclear         |                                                                                                                                                                                                                                                                                                                                                                                                                                                                                                                                                                                                                                                |                                                                                                                                                                                                                                                                                                                                                                                                                                                                   | organic cyclic compound binding; heterocyclic compound binding; nucleoside phosphate binding; binding; nucleic acid binding; nucleotide binding; small molecule binding;                                                                                                                                                                                                                                                                                                                                                                                                                                                                                                                                                                                                                                                                                                                                                                                                                                                        | K12894 | IPR000504; IPR012677; RNA recognition motif domain; Nucleotide-binding, alpha-                |                                                                                                                                                                                                                                                                                                                                                                                                             |
| Q6PH15 | slc1a2b         | Amino acid transporter            | _PK(cr)HVEVR_        | 3    | 1 | ____MPKH VEVRMH                | plasma membrane |                                                                                                                                                                                                                                                                                                                                                                                                                                                                                                                                                                                                                                                | membrane;                                                                                                                                                                                                                                                                                                                                                                                                                                                         | organic acid transmembrane transporter activity; dicarboxylic acid transmembrane transporter activity; solute:cation symporter activity; active transmembrane transporter activity; secondary active transmembrane transporter activity; ion transmembrane transporter activity; symporter activity; solute:sodium symporter activity; substrate-specific transporter activity; monovalent inorganic cation transmembrane transporter activity; substrate-specific transmembrane transporter activity; metal ion transmembrane transporter activity; sodium:dicarboxylate symporter activity; anion:cation symporter activity; organic acid:sodium symporter activity; inorganic cation transmembrane transporter activity; sodium ion transmembrane transporter activity; organic anion transmembrane transporter activity; cation transmembrane transporter activity; anion transmembrane transporter activity; transporter activity; transmembrane transporter activity; carboxylic acid transmembrane transporter activity; |        | K05613                                                                                        |                                                                                                                                                                                                                                                                                                                                                                                                             |
| Q6NYR4 | hspa8           | Heat shock cognate 71 kDa protein | _PK(cr)VOVEYK_       | 102  | 1 | INDNSRPK VQVEYKG               | cytosol         | response to stress; response to stimulus;                                                                                                                                                                                                                                                                                                                                                                                                                                                                                                                                                                                                      |                                                                                                                                                                                                                                                                                                                                                                                                                                                                   | ATP binding; nucleoside phosphate binding; nucleoside binding; ion binding; nucleotide binding; organic cyclic compound binding; heterocyclic compound binding; ribonucleoside binding; carboxylate derivative binding; ribonucleotide binding; binding; purine ribonucleoside binding; anion binding; purine ribonucleotide binding; adenylyl ribonucleotide binding; purine nucleotide binding; small molecule binding; purine ribonucleoside triphosphate binding;                                                                                                                                                                                                                                                                                                                                                                                                                                                                                                                                                           |        | K03283                                                                                        | dre04010 MAPK signaling pathway - Danio rerio (zebrafish); dre04141 Protein processing in endoplasmic reticulum - Danio rerio (zebrafish); dre04144 Endocytosis - Danio rerio (zebrafish); dre03040 Spliceosome - Danio rerio (zebrafish);<br>HSPA1.8; Heat shock 70kDa protein 1/8<br>IPR029048; IPR029047; Heat shock protein 70kD, C-terminal domain; Heat shock protein 70kD, peptidase-binding domain; |
| B8A568 | myh2.1          | Uncharacterized protein           | _QAAEAQK(cr)QJLR_    | 1643 | 1 | QAAEAQK LRNVQA .....K.L....    | nuclear         |                                                                                                                                                                                                                                                                                                                                                                                                                                                                                                                                                                                                                                                | intracellular organelle; intracellular non-membrane-bounded organelle; cytoskeleton part; intracellular organelle part; macromolecular complex; intracellular part; cell; actin cytoskeleton; organelle part; non-membrane-bounded organelle; organelle; cytoskeleton; cell part; intracellular; myosin complex; protein complex;                                                                                                                                 | ATP binding; motor activity; nucleoside phosphate binding; nucleoside binding; ion binding; hydrolase activity, acting on acid anhydrides; hydrolase activity; nucleotide binding; nucleoside-triphosphatase activity; organic cyclic compound binding; heterocyclic compound binding; ribonucleoside binding; carboxylate derivative binding; pyrophosphatase activity; catalytic activity; ribonucleotide binding; binding; purine ribonucleoside binding; anion binding; purine ribonucleotide binding; adenylyl ribonucleotide binding; adenylyl nucleotide binding; purine nucleoside binding; hydrolase activity, acting on acid anhydrides, in phosphorus-containing anhydrides; purine nucleotide binding; small molecule binding; purine ribonucleoside triphosphate binding;                                                                                                                                                                                                                                          |        | K10352                                                                                        | MYH; myosin heavy chain<br>dre04530 Tight junction - Danio rerio (zebrafish);<br>IPR002928; IPR004009; IPR001609; IPR027417; IPR027401; Myosin tail; Myosin, N-terminal, SH3-like; Myosin head, motor domain; P-loop containing nucleoside triphosphate hydrolase; Myosin-like IQ motif-containing domain;                                                                                                  |
| B8A561 | myh2.2          | Uncharacterized protein           | _QAAEAQK(cr)QJLR_    | 1643 | 1 | QAAEAQK LRNVQA .....K.L....    | nuclear         |                                                                                                                                                                                                                                                                                                                                                                                                                                                                                                                                                                                                                                                | intracellular organelle; intracellular non-membrane-bounded organelle; cytoskeleton part; intracellular organelle part; macromolecular complex; intracellular part; cell; actin cytoskeleton; organelle part; non-membrane-bounded organelle; organelle; cytoskeleton; cell part; intracellular; myosin complex; protein complex;                                                                                                                                 | ATP binding; motor activity; nucleoside phosphate binding; nucleoside binding; ion binding; hydrolase activity, acting on acid anhydrides; hydrolase activity; nucleotide binding; nucleoside-triphosphatase activity; organic cyclic compound binding; heterocyclic compound binding; ribonucleoside binding; carboxylate derivative binding; pyrophosphatase activity; catalytic activity; ribonucleotide binding; binding; purine ribonucleoside binding; anion binding; purine ribonucleotide binding; adenylyl ribonucleotide binding; adenylyl nucleotide binding; purine nucleoside binding; hydrolase activity, acting on acid anhydrides, in phosphorus-containing anhydrides; purine nucleotide binding; small molecule binding; purine ribonucleoside triphosphate binding;                                                                                                                                                                                                                                          |        | K10352                                                                                        | MYH; myosin heavy chain<br>dre04530 Tight junction - Danio rerio (zebrafish);<br>IPR002928; IPR004009; IPR001609; IPR027417; IPR027401; Myosin tail; Myosin, N-terminal, SH3-like; Myosin head, motor domain; P-loop containing nucleoside triphosphate hydrolase; Myosin-like IQ motif-containing domain;                                                                                                  |
| B8A568 | myh2.1          | Uncharacterized protein           | _QAFTQIEELK(cr)R_    | 1318 | 1 | TAFTQIEELK RQIEEV              | nuclear         |                                                                                                                                                                                                                                                                                                                                                                                                                                                                                                                                                                                                                                                | intracellular organelle; intracellular non-membrane-bounded organelle; cytoskeleton part; intracellular organelle part; macromolecular complex; intracellular part; cell; actin cytoskeleton; organelle part; non-membrane-bounded organelle; organelle; cytoskeleton; cell part; intracellular; myosin complex; protein complex;                                                                                                                                 | ATP binding; motor activity; nucleoside phosphate binding; nucleoside binding; ion binding; hydrolase activity, acting on acid anhydrides; hydrolase activity; nucleotide binding; nucleoside-triphosphatase activity; organic cyclic compound binding; heterocyclic compound binding; ribonucleoside binding; carboxylate derivative binding; pyrophosphatase activity; catalytic activity; ribonucleotide binding; binding; purine ribonucleoside binding; anion binding; purine ribonucleotide binding; adenylyl ribonucleotide binding; adenylyl nucleotide binding; purine nucleoside binding; hydrolase activity, acting on acid anhydrides, in phosphorus-containing anhydrides; purine nucleotide binding; small molecule binding; purine ribonucleoside triphosphate binding;                                                                                                                                                                                                                                          |        | K10352                                                                                        | MYH; myosin heavy chain<br>dre04530 Tight junction - Danio rerio (zebrafish);<br>IPR002928; IPR004009; IPR001609; IPR027417; IPR027401; Myosin tail; Myosin, N-terminal, SH3-like; Myosin head, motor domain; P-loop containing nucleoside triphosphate hydrolase; Myosin-like IQ motif-containing domain;                                                                                                  |

|        |         |                               |                         |      |   |                               |                       |                                                                                                                                                                                                                                                                                                                                                                                                                                                                                                                                                                                                                                                                                                                                             |                                                                                                                                                                                                                                                                                                                                                                                                                                                                                                                                                                                                                                                                                                                                                                                         |                                                                                                                                                                                                                    |                         |                                                     |                                                                                                    |                                                                                                                                                                                                                                                                                                                     |                                                                                       |
|--------|---------|-------------------------------|-------------------------|------|---|-------------------------------|-----------------------|---------------------------------------------------------------------------------------------------------------------------------------------------------------------------------------------------------------------------------------------------------------------------------------------------------------------------------------------------------------------------------------------------------------------------------------------------------------------------------------------------------------------------------------------------------------------------------------------------------------------------------------------------------------------------------------------------------------------------------------------|-----------------------------------------------------------------------------------------------------------------------------------------------------------------------------------------------------------------------------------------------------------------------------------------------------------------------------------------------------------------------------------------------------------------------------------------------------------------------------------------------------------------------------------------------------------------------------------------------------------------------------------------------------------------------------------------------------------------------------------------------------------------------------------------|--------------------------------------------------------------------------------------------------------------------------------------------------------------------------------------------------------------------|-------------------------|-----------------------------------------------------|----------------------------------------------------------------------------------------------------|---------------------------------------------------------------------------------------------------------------------------------------------------------------------------------------------------------------------------------------------------------------------------------------------------------------------|---------------------------------------------------------------------------------------|
| B8A561 | myhz1.2 | Uncharacterized protein       | _QAFYQIEELK(cr)R_       | 1318 | 1 | TQIEELKROIEEV                 | nuclear               | intracellular organelle; intracellular non-membrane-bounded organelle; cytoskeletal part; intracellular organelle part; macromolecular complex; intracellular part; cell; actin cytoskeleton; organelle part; non-membrane-bounded organelle; organelle; cytoskeleton; cell part; intracellular; myosin complex; protein complex;                                                                                                                                                                                                                                                                                                                                                                                                           | ATP binding; motor activity; nucleoside phosphate binding; nucleoside binding; ion binding; hydrolase activity, acting on acid anhydrides; hydrolase activity; nucleotide binding; nucleoside-triphosphatase activity; organic cyclic compound binding; heterocyclic compound binding; ribonucleoside binding; carbohydrate derivative binding; pyrophosphatase activity; catalytic activity; ribonucleotide binding; binding; purine ribonucleoside binding; anion binding; purine ribonucleotide binding; adenylyl ribonucleotide binding; adenylyl nucleotide binding; purine nucleoside binding; hydrolase activity, acting on acid anhydrides, in phosphorus-containing anhydrides; purine nucleotide binding; small molecule binding; purine ribonucleoside triphosphate binding; | K10352                                                                                                                                                                                                             | MYH; myosin heavy chain | dre04630 Tight Junction - Danio rerio (zebrafish);  | IPR002928; IPR004009; IPR001609; IPR027417; IPR027401;                                             | Myosin tail; Myosin, N-terminal, SH3-like; Myosin head, motor domain; P-loop containing nucleoside triphosphate hydrolase; Myosin-like IQ motif-containing domain;                                                                                                                                                  |                                                                                       |
| Q6PE25 | eef1g   | Elongation factor 1-gamma     | _QATEQAK(cr)EVEK_       | 132  | 1 | KQATEQAKKEVKRL .....K.E.....  | nuclear               | cell part; intracellular; cytoplasm; macromolecular complex; intracellular part; protein complex; cell; cytoplasmic part; eukaryotic translation elongation factor 1 complex;                                                                                                                                                                                                                                                                                                                                                                                                                                                                                                                                                               | organic cyclic compound binding; heterocyclic compound binding; RNA binding; translation factor activity; nucleic acid binding; translation elongation factor activity; binding; nucleic acid binding;                                                                                                                                                                                                                                                                                                                                                                                                                                                                                                                                                                                  | K03233                                                                                                                                                                                                             |                         |                                                     | IPR004046; IPR010987; IPR001662; IPR004045; IPR012336;                                             | Glutathione S-transferase, C-terminal; Glutathione S-transferase, C-terminal-like; Translation elongation factor EF1B, gamma chain, conserved; Glutathione S-transferase, N-terminal; Thioredoxin-like fold;                                                                                                        |                                                                                       |
| Q5TZ29 | apobb.1 | Uncharacterized protein       | _OFVANFDQEK(cr)FTEDVK_  | 2123 | 1 | VANFDQEKFTEDVKN               | endoplasmic reticulum | response to chemical; response to stimulus;                                                                                                                                                                                                                                                                                                                                                                                                                                                                                                                                                                                                                                                                                                 | lipid transporter activity; substrate-specific transporter activity; transporter activity;                                                                                                                                                                                                                                                                                                                                                                                                                                                                                                                                                                                                                                                                                              |                                                                                                                                                                                                                    |                         |                                                     | IPR011030; IPR015817; IPR015818; IPR001747; IPR015819; IPR015816; IPR016024; IPR015255; IPR009454; | Vitellogen, superhelical; Vitellogen, open beta-sheet, subdomain 1; Vitellogen, open beta-sheet, subdomain 2; Lipid transport protein, N-terminal; Lipid transport protein, beta-sheet shell; Vitellogen, beta-sheet N-terminal; Armadillo-type fold; Vitellogen, open beta-sheet; Lipid transport, open beta-sheet |                                                                                       |
| Q6NZU0 | hspa4b  | Heat shock protein 4          | _QIYDK(cr)LAELK_        | 676  | 1 | PKQIYDKLAELKNL .....DK.....   | cytosol               | response to stress; response to stimulus;                                                                                                                                                                                                                                                                                                                                                                                                                                                                                                                                                                                                                                                                                                   | ATP binding; nucleoside phosphate binding; nucleoside binding; ion binding; nucleotide binding; organic cyclic compound binding; heterocyclic compound binding; ribonucleoside binding; carbohydrate derivative binding; ribonucleotide binding; binding; purine ribonucleoside binding; anion binding; purine ribonucleotide binding; adenylyl ribonucleotide binding; adenylyl nucleotide binding; purine nucleoside binding; purine nucleotide binding; small molecule binding; purine ribonucleoside triphosphate binding;                                                                                                                                                                                                                                                          | K09489                                                                                                                                                                                                             |                         |                                                     | IPR029048; IPR029047;                                                                              | Heat shock protein 70kD, C-terminal domain; Heat shock protein 70kD, peptide-binding domain;                                                                                                                                                                                                                        |                                                                                       |
| Q7ZV77 | psma4   | Proteasome subunit alpha type | _QK(cr)EVEELIK_         | 231  | 1 | KIKVLKQKEVEELIK .....K.V..... | mitochondria          | modification-dependent macromolecule catabolic process; cellular macromolecule catabolic process; proteolysis involved in cellular protein catabolic process; cellular protein catabolic process; modification-dependent protein catabolic process; ubiquitin-protein metabolic process; ubiquitin-dependent protein catabolic process; primary metabolic process; cellular metabolic process; organic substance metabolic process; organic substance catabolic process; metabolic process; protein catabolic process; macromolecule catabolic process; cellular macromolecule metabolic process; cellular catabolic process; proteolysis; protein metabolic process; macromolecule metabolic process; cellular process; catabolic process; | intracellular organelle; proteasome core complex, alpha-subunit complex; proteasome complex; cytoplasm; macromolecular complex; intracellular part; cell; intracellular membrane-bounded organelle; organelle; nucleus; intracellular; cell part; proteasome core complex; membrane-bounded organelle; protein complex;                                                                                                                                                                                                                                                                                                                                                                                                                                                                 | endopeptidase activity; threonine-type endopeptidase activity; peptidase activity; catalytic activity; threonine-type peptidase activity; peptidase activity, acting on L-amino acid peptides; hydrolase activity; | K02728                  | PSMA4; 20S proteasome subunit alpha 3 [EC:3.4.25.1] | dre03050 Proteasome - Danio rerio (zebrafish);                                                     | IPR029055; IPR000426;                                                                                                                                                                                                                                                                                               | Nucleophile aminohydrolases, N-terminal; Proteasome alpha-subunit, N-terminal domain; |
| F1QK60 | krt4    | Uncharacterized protein       | _QK(cr)FEEMSTAGQYGDLLR_ | 308  | 1 | AESWYKQKFEEMOST .....K.E..... | nuclear               | intracellular organelle; intracellular non-membrane-bounded organelle; cytoskeletal part; intracellular organelle part; macromolecular complex; intracellular part; cell; keratin filament; organelle part; non-membrane-bounded organelle; organelle; cytoskeleton; intermediate filament cytoskeleton; cell part; intracellular; intermediate filament; protein complex;                                                                                                                                                                                                                                                                                                                                                                  | structural molecule activity;                                                                                                                                                                                                                                                                                                                                                                                                                                                                                                                                                                                                                                                                                                                                                           | K07605                                                                                                                                                                                                             |                         |                                                     |                                                                                                    |                                                                                                                                                                                                                                                                                                                     |                                                                                       |

|        |        |                                                       |                        |      |   |                               |         |                                                                                                                                                                                                                                                                                                                                                                                                                                                                                                                                                                                                                                                                                                                                                                                                                                                                                                                                                                                                                                                                                                                                                                                                                      |                                                                                                                                                                                                                                                                                                                                                                                                                                                                                                                                                                                                                                                                                                                                                                                                                                                                                                                                                                                                                                                                                                                                                                                                                                                                                                                                               |        |                                                  |                                                                                                                                           |                                                        |                                                                                                                                                                    |
|--------|--------|-------------------------------------------------------|------------------------|------|---|-------------------------------|---------|----------------------------------------------------------------------------------------------------------------------------------------------------------------------------------------------------------------------------------------------------------------------------------------------------------------------------------------------------------------------------------------------------------------------------------------------------------------------------------------------------------------------------------------------------------------------------------------------------------------------------------------------------------------------------------------------------------------------------------------------------------------------------------------------------------------------------------------------------------------------------------------------------------------------------------------------------------------------------------------------------------------------------------------------------------------------------------------------------------------------------------------------------------------------------------------------------------------------|-----------------------------------------------------------------------------------------------------------------------------------------------------------------------------------------------------------------------------------------------------------------------------------------------------------------------------------------------------------------------------------------------------------------------------------------------------------------------------------------------------------------------------------------------------------------------------------------------------------------------------------------------------------------------------------------------------------------------------------------------------------------------------------------------------------------------------------------------------------------------------------------------------------------------------------------------------------------------------------------------------------------------------------------------------------------------------------------------------------------------------------------------------------------------------------------------------------------------------------------------------------------------------------------------------------------------------------------------|--------|--------------------------------------------------|-------------------------------------------------------------------------------------------------------------------------------------------|--------------------------------------------------------|--------------------------------------------------------------------------------------------------------------------------------------------------------------------|
| Q6DRD1 | atp5o  | ATP synthase oligomycin sensitivity conferral protein | _OK(cr)TFVDALTK_       | 87   | 1 | VKRSVKQKTFVDALT               | cytosol | nucleoside metabolic process; purine nucleoside metabolic process; purine ribonucleoside monophosphate metabolic process; nucleoside metabolic process; single-organism process; purine ribonucleoside biosynthetic process; nucleoside biosynthetic process; biosynthetic process; ribonucleoside monophosphate biosynthetic process; cellular metabolic process; phosphate-containing compound metabolic process; establishment of localization; ribose phosphate biosynthetic process; metabolic process; carbohydrate derivative biosynthetic process; nucleoside phosphate metabolic process; ribose phosphate metabolic process; purine nucleoside triphosphate biosynthetic process; single-organism transport; heterocycle biosynthetic process; cation transmembrane transport; purine ribonucleoside triphosphate biosynthetic process; small molecule metabolic process; ATP biosynthetic process; single-organism cellular process; purine ribonucleoside triphosphate metabolic process; organic cyclic compound metabolic process; purine-containing compound metabolic process; energy coupled proton transport, down electrochemical gradient; ribonucleoside triphosphate metabolic process; purine | active transmembrane transporter activity; ATPase activity, coupled to transmembrane movement of ions; ion transmembrane transporter activity; primary active transmembrane transporter activity; ATPase activity, coupled to transmembrane movement of ions, rotational mechanism; hydrolase activity, acting on acid anhydrides; substrate-specific transporter activity; monovalent inorganic cation transmembrane transporter activity; hydrolase activity; nucleoside-triphosphatase activity; hydrogen ion transmembrane transporter activity; substrate-specific transmembrane transporter activity; proton-transporting ATP synthase activity, rotational mechanism; ATPase activity; P-P-bond-hydrolysis-driven transmembrane transporter activity; pyrophosphatase activity; cation-transporting ATPase activity; ATPase activity, coupled to transmembrane movement of substances; catalytic activity; ATPase activity, coupled to movement of substances; ATPase activity, coupled; hydrolase activity, acting on acid anhydrides, catalyzing transmembrane movement of substances; inorganic cation transmembrane transporter activity; hydrolase activity, acting on acid anhydrides, in phosphorus-containing anhydrides; cation transmembrane transporter activity; transporter activity; transmembrane transporter activity; | K02137 | ATP6FO; F-type H+ transportin g ATPase subunit O | dre01100 Metabolic pathways - Danio rerio (zebrafish); dre00190 Oxidative phosphorylation - Danio rerio (zebrafish);                      | IPR026015;                                             | F1FO ATP synthase; OSCP/delta subunit, N-terminal domain;                                                                                                          |
| B8A568 | myh2.1 | Uncharacterized protein                               | _QK(cr)YEEGQALEGAQK_   | 1461 | 1 | VLAEWKQKYEEOGAE .....K.E..... | nuclear | intracellular organelle; intracellular non-membrane-bounded organelle; cytoskeleton part; intracellular organelle part; macromolecular complex; intracellular part; cell; actin cytoskeleton; organelle part; non-membrane-bounded organelle; organelle; cytoskeleton; cell part; intracellular; myosin complex; protein complex;                                                                                                                                                                                                                                                                                                                                                                                                                                                                                                                                                                                                                                                                                                                                                                                                                                                                                    | ATP binding; motor activity; nucleoside phosphate binding; nucleoside binding; ion binding; hydrolase activity, acting on acid anhydrides; hydrolase activity; nucleotide binding; nucleoside-triphosphatase activity; organic cyclic compound binding; heterocyclic compound binding; ribonucleoside binding; carbohydrate derivative binding; pyrophosphatase activity; catalytic activity; ribonucleotide binding; binding; purine ribonucleoside binding; anion binding; purine ribonucleotide binding; adenylyl ribonucleotide binding; adenylyl nucleotide binding; purine nucleoside binding; hydrolase activity, acting on acid anhydrides, in phosphorus-containing anhydrides; purine nucleotide binding; small molecule binding; purine ribonucleoside triphosphate binding;                                                                                                                                                                                                                                                                                                                                                                                                                                                                                                                                                       | K10352 | MYH; myosin heavy chain                          | dre04530 Tight junction - Danio rerio (zebrafish);                                                                                        | IPR002928; IPR004009; IPR001609; IPR027417; IPR027401; | Myosin tail; Myosin, N-terminal, SH3-like; Myosin head, motor domain; P-loop containing nucleoside triphosphate hydrolase; Myosin-like IQ motif-containing domain; |
| B8A561 | myh2.2 | Uncharacterized protein                               | _QK(cr)YEEGQALEGAQK_   | 1461 | 1 | VLAEWKQKYEEOGAE .....K.E..... | nuclear | intracellular organelle; intracellular non-membrane-bounded organelle; cytoskeleton part; intracellular organelle part; macromolecular complex; intracellular part; cell; actin cytoskeleton; organelle part; non-membrane-bounded organelle; organelle; cytoskeleton; cell part; intracellular; myosin complex; protein complex;                                                                                                                                                                                                                                                                                                                                                                                                                                                                                                                                                                                                                                                                                                                                                                                                                                                                                    | ATP binding; motor activity; nucleoside phosphate binding; nucleoside binding; ion binding; hydrolase activity, acting on acid anhydrides; hydrolase activity; nucleotide binding; nucleoside-triphosphatase activity; organic cyclic compound binding; heterocyclic compound binding; ribonucleoside binding; carbohydrate derivative binding; pyrophosphatase activity; catalytic activity; ribonucleotide binding; binding; purine ribonucleoside binding; anion binding; purine ribonucleotide binding; adenylyl ribonucleotide binding; adenylyl nucleotide binding; purine nucleoside binding; hydrolase activity, acting on acid anhydrides, in phosphorus-containing anhydrides; purine nucleotide binding; small molecule binding; purine ribonucleoside triphosphate binding;                                                                                                                                                                                                                                                                                                                                                                                                                                                                                                                                                       | K10352 | MYH; myosin heavy chain                          | dre04530 Tight junction - Danio rerio (zebrafish);                                                                                        | IPR002928; IPR004009; IPR001609; IPR027417; IPR027401; | Myosin tail; Myosin, N-terminal, SH3-like; Myosin head, motor domain; P-loop containing nucleoside triphosphate hydrolase; Myosin-like IQ motif-containing domain; |
| F1QK60 | kr4    | Uncharacterized protein                               | _LDLGLNEK(cr)MK_       | 181  | 1 | LDLGLNEKMKLEGEL               | nuclear | intracellular organelle; intracellular non-membrane-bounded organelle; cytoskeleton part; intracellular organelle part; macromolecular complex; intracellular part; cell; keratin filament; organelle part; non-membrane-bounded organelle; organelle; cytoskeleton; intermediate filament cytoskeleton; cell part; intracellular; intermediate filament; protein complex; cytoskeleton; organelle; intracellular organelle; intracellular non-membrane-bounded organelle; cell part; intracellular; cytoplasm; intracellular part; cell; non-membrane-bounded organelle;                                                                                                                                                                                                                                                                                                                                                                                                                                                                                                                                                                                                                                            | structural molecule activity;                                                                                                                                                                                                                                                                                                                                                                                                                                                                                                                                                                                                                                                                                                                                                                                                                                                                                                                                                                                                                                                                                                                                                                                                                                                                                                                 | K07605 |                                                  |                                                                                                                                           |                                                        |                                                                                                                                                                    |
| P13104 | tpma   | Tropomyosin alpha-1 chain                             | _QLEDDLVALQK(cr)K_     | 48   | 1 | DDLVALQKKLKATED .....K.L..... | cytosol | cytoskeleton; organelle; intracellular organelle; intracellular non-membrane-bounded organelle; cell part; intracellular; cytoplasm; intracellular part; cell; non-membrane-bounded organelle;                                                                                                                                                                                                                                                                                                                                                                                                                                                                                                                                                                                                                                                                                                                                                                                                                                                                                                                                                                                                                       | ATP binding; motor activity; nucleoside phosphate binding; nucleoside binding; ion binding; hydrolase activity, acting on acid anhydrides; hydrolase activity; nucleotide binding; nucleoside-triphosphatase activity; organic cyclic compound binding; heterocyclic compound binding; ribonucleoside binding; carbohydrate derivative binding; pyrophosphatase activity; catalytic activity; ribonucleotide binding; binding; purine ribonucleoside binding; anion binding; purine ribonucleotide binding; adenylyl ribonucleotide binding; adenylyl nucleotide binding; purine nucleoside binding; hydrolase activity, acting on acid anhydrides, in phosphorus-containing anhydrides; purine nucleotide binding; small molecule binding; purine ribonucleoside triphosphate binding;                                                                                                                                                                                                                                                                                                                                                                                                                                                                                                                                                       | K10373 | TPM1; tropomyosin 1                              | dre04530 Carotid muscle contraction - Danio rerio (zebrafish); dre04261 Adrenergic signaling in cardiomyocytes - Danio rerio (zebrafish); | IPR002928; IPR004009; IPR001609; IPR027417; IPR027401; | Myosin tail; Myosin, N-terminal, SH3-like; Myosin head, motor domain; P-loop containing nucleoside triphosphate hydrolase; Myosin-like IQ motif-containing domain; |
| B8A561 | myh2.2 | Uncharacterized protein                               | _QLEEK(cr)EALVSQLTR_   | 1296 | 1 | FGRLKEEKEALVSQL               | nuclear | intracellular organelle; intracellular non-membrane-bounded organelle; cytoskeleton part; intracellular organelle part; macromolecular complex; intracellular part; cell; actin cytoskeleton; organelle part; non-membrane-bounded organelle; organelle; cytoskeleton; cell part; intracellular; myosin complex; protein complex;                                                                                                                                                                                                                                                                                                                                                                                                                                                                                                                                                                                                                                                                                                                                                                                                                                                                                    | ATP binding; motor activity; nucleoside phosphate binding; nucleoside binding; ion binding; hydrolase activity, acting on acid anhydrides; hydrolase activity; nucleotide binding; nucleoside-triphosphatase activity; organic cyclic compound binding; heterocyclic compound binding; ribonucleoside binding; carbohydrate derivative binding; pyrophosphatase activity; catalytic activity; ribonucleotide binding; binding; purine ribonucleoside binding; anion binding; purine ribonucleotide binding; adenylyl ribonucleotide binding; adenylyl nucleotide binding; purine nucleoside binding; hydrolase activity, acting on acid anhydrides, in phosphorus-containing anhydrides; purine nucleotide binding; small molecule binding; purine ribonucleoside triphosphate binding;                                                                                                                                                                                                                                                                                                                                                                                                                                                                                                                                                       | K10352 | MYH; myosin heavy chain                          | dre04530 Tight junction - Danio rerio (zebrafish);                                                                                        | IPR002928; IPR004009; IPR001609; IPR027417; IPR027401; | Myosin tail; Myosin, N-terminal, SH3-like; Myosin head, motor domain; P-loop containing nucleoside triphosphate hydrolase; Myosin-like IQ motif-containing domain; |
| Q99U9  | tnn3a  | Fast skeletal muscle troponin T                       | _QLNIDLHNEK(cr)LR_     | 173  | 1 | IDHLNEDKLRDKAQE .....DK.....  | nuclear |                                                                                                                                                                                                                                                                                                                                                                                                                                                                                                                                                                                                                                                                                                                                                                                                                                                                                                                                                                                                                                                                                                                                                                                                                      | ATP binding; motor activity; nucleoside phosphate binding; nucleoside binding; ion binding; hydrolase activity, acting on acid anhydrides; hydrolase activity; nucleotide binding; nucleoside-triphosphatase activity; organic cyclic compound binding; heterocyclic compound binding; ribonucleoside binding; carbohydrate derivative binding; pyrophosphatase activity; catalytic activity; ribonucleotide binding; binding; purine ribonucleoside binding; anion binding; purine ribonucleotide binding; adenylyl ribonucleotide binding; adenylyl nucleotide binding; purine nucleoside binding; hydrolase activity, acting on acid anhydrides, in phosphorus-containing anhydrides; purine nucleotide binding; small molecule binding; purine ribonucleoside triphosphate binding;                                                                                                                                                                                                                                                                                                                                                                                                                                                                                                                                                       | K10352 | MYH; myosin heavy chain                          | dre04530 Tight junction - Danio rerio (zebrafish);                                                                                        | IPR002928; IPR004009; IPR001609; IPR027417; IPR027401; | Myosin tail; Myosin, N-terminal, SH3-like; Myosin head, motor domain; P-loop containing nucleoside triphosphate hydrolase; Myosin-like IQ motif-containing domain; |
| B8A568 | myh2.1 | Uncharacterized protein                               | _QSEAEQOANSHLSK(cr)LR_ | 1897 | 1 | QANSHLSKLRKQVHE               | nuclear | intracellular organelle; intracellular non-membrane-bounded organelle; cytoskeleton part; intracellular organelle part; macromolecular complex; intracellular part; cell; actin cytoskeleton; organelle part; non-membrane-bounded organelle; organelle; cytoskeleton; cell part; intracellular; myosin complex; protein complex;                                                                                                                                                                                                                                                                                                                                                                                                                                                                                                                                                                                                                                                                                                                                                                                                                                                                                    | ATP binding; motor activity; nucleoside phosphate binding; nucleoside binding; ion binding; hydrolase activity, acting on acid anhydrides; hydrolase activity; nucleotide binding; nucleoside-triphosphatase activity; organic cyclic compound binding; heterocyclic compound binding; ribonucleoside binding; carbohydrate derivative binding; pyrophosphatase activity; catalytic activity; ribonucleotide binding; binding; purine ribonucleoside binding; anion binding; purine ribonucleotide binding; adenylyl ribonucleotide binding; adenylyl nucleotide binding; purine nucleoside binding; hydrolase activity, acting on acid anhydrides, in phosphorus-containing anhydrides; purine nucleotide binding; small molecule binding; purine ribonucleoside triphosphate binding;                                                                                                                                                                                                                                                                                                                                                                                                                                                                                                                                                       | K10352 | MYH; myosin heavy chain                          | dre04530 Tight junction - Danio rerio (zebrafish);                                                                                        | IPR002928; IPR004009; IPR001609; IPR027417; IPR027401; | Myosin tail; Myosin, N-terminal, SH3-like; Myosin head, motor domain; P-loop containing nucleoside triphosphate hydrolase; Myosin-like IQ motif-containing domain; |

|        |         |                                                     |                          |      |   |                                |                  |                                                                                                                                                                                                                                                                                                                                   |                                                                                                                                                                                                                                                                                                                                                                                                                                                                                                                                                                                                                                                                                                                                                                                                                                                                                                                       |        |                                               |                                                     |                                                                                                                  |                                                                                                                                                                                                                                                                                                                                     |
|--------|---------|-----------------------------------------------------|--------------------------|------|---|--------------------------------|------------------|-----------------------------------------------------------------------------------------------------------------------------------------------------------------------------------------------------------------------------------------------------------------------------------------------------------------------------------|-----------------------------------------------------------------------------------------------------------------------------------------------------------------------------------------------------------------------------------------------------------------------------------------------------------------------------------------------------------------------------------------------------------------------------------------------------------------------------------------------------------------------------------------------------------------------------------------------------------------------------------------------------------------------------------------------------------------------------------------------------------------------------------------------------------------------------------------------------------------------------------------------------------------------|--------|-----------------------------------------------|-----------------------------------------------------|------------------------------------------------------------------------------------------------------------------|-------------------------------------------------------------------------------------------------------------------------------------------------------------------------------------------------------------------------------------------------------------------------------------------------------------------------------------|
| B8A561 | myhz1.2 | Uncharacterized protein                             | _QSEAEQANSHLSK(cr)LR_    | 1897 | 1 | QANSHLSKLRKVVQHE               | nuclear          | intracellular organelle; intracellular non-membrane-bounded organelle; cytoskeleton part; intracellular organelle part; macromolecular complex; intracellular part; cell; actin cytoskeleton; organelle part; non-membrane-bounded organelle; organelle; cytoskeleton; cell part; intracellular; myosin complex; protein complex; | ATP binding; motor activity; nucleoside phosphate binding; nucleoside binding; ion binding; hydrolase activity, acting on acid anhydrides; hydrolase activity; nucleotide binding; nucleoside-triphosphatase activity; organic cyclic compound binding; heterocyclic compound binding; ribonucleoside binding; carbohydrate derivative binding; pyrophosphatase activity; catalytic activity; ribonucleoside binding; binding; purine ribonucleoside binding; anion binding; purine ribonucleoside binding; adenylyl ribonucleoside binding; adenylyl nucleotide binding; purine nucleoside binding; hydrolase activity, acting on acid anhydrides, in phosphorus-containing anhydrides; purine nucleotide binding; small molecule binding; purine ribonucleoside triphosphate binding;                                                                                                                               | K10352 | MYH; myosin heavy chain                       | dre04530 Tight junction - Danio rerio (zebrafish);  | IPR002928; IPR004009; IPR001609; IPR027417; IPR027401;                                                           | Myosin tail; Myosin, N-terminal, SH3-like; Myosin head, motor domain; P-loop containing nucleoside triphosphate hydrolase; Myosin-like IQ motif-containing domain;                                                                                                                                                                  |
| Q6DGL9 | rp138   | Ribosomal protein L38                               | _QSLPPGLAVK(cr)ELK_      | 67   | 1 | LPPGLAVKELK_                   | nuclear          | ribosome, organelle; intracellular organelle; intracellular non-membrane-bounded organelle; cell part; intracellular; cytoplasm; macromolecular complex; intracellular part; cell; ribonucleoprotein complex; cytoplasmic part; non-membrane-bounded organelle;                                                                   | structural constituent of ribosome; structural molecule activity;                                                                                                                                                                                                                                                                                                                                                                                                                                                                                                                                                                                                                                                                                                                                                                                                                                                     | K02923 | RP-L38e; large subunit ribosomal protein L38e | dre03010 Ribosome - Danio rerio (zebrafish);        |                                                                                                                  |                                                                                                                                                                                                                                                                                                                                     |
| Q08CK7 | igl2bp1 | Insulin-like growth factor 2 mRNA-binding protein 1 | _QTQSK(cr)IDVHR_         | 231  | 1 | ITQTSKIDVHRKE                  | cytosol, nuclear | organelle; intracellular membrane-bounded organelle; intracellular organelle; nucleus; CRD-mediated mRNA stability complex; cell part; intracellular; cytoplasm; macromolecular complex; intracellular part; membrane-bounded organelle; protein complex; cell; cytoplasmic part;                                                 | organic cyclic compound binding; heterocyclic compound binding; RNA binding; mRNA binding; poly(A) RNA binding; nucleoside phosphate binding; mRNA 3'-UTR binding; binding; nucleic acid binding; nucleotide binding; small molecule binding;                                                                                                                                                                                                                                                                                                                                                                                                                                                                                                                                                                                                                                                                         | K17391 |                                               |                                                     | K Homology domain; K Homology domain, type 1; RNA recognition motif domain; Nucleotide-binding, alpha-beta plat; |                                                                                                                                                                                                                                                                                                                                     |
| Q92005 | eef1a   | Elongation factor 1-alpha                           | _QTVAVGVK(cr)SVEK_       | 439  | 1 | TVAVGVKSVEKIG .....K.V.....    | cytosol          | intracellular part; cell; cell part; intracellular; cytoplasm;                                                                                                                                                                                                                                                                    | nucleoside phosphate binding; translation elongation factor activity; hydrolase activity, acting on acid anhydrides; hydrolase activity; organic cyclic compound binding; heterocyclic compound binding; pyrophosphatase activity; catalytic activity; ribonucleoside binding; binding; GTase activity; purine ribonucleoside binding; anion binding; hydrolase activity, acting on acid anhydrides, in phosphorus-containing anhydrides; guanylyl nucleotide binding; GTP binding; purine nucleoside binding; purine ribonucleoside triphosphate binding; RNA binding; ion binding; nucleoside binding; nucleotide binding; nucleoside-triphosphatase activity; ribonucleoside binding; translation factor activity; nucleic acid binding; carbohydrate derivative binding; nucleic acid binding; purine ribonucleoside binding; guanylyl ribonucleoside binding; purine nucleoside binding; small molecule binding; | K03231 | EEF1A; elongation factor 1-alpha              | dre03013 RNA transport - Danio rerio (zebrafish);   | IPR004160; IPR004161; IPR009001; IPR027417; IPR003795; IPR009000;                                                | Translation elongation factor EFTuEF1A, C-terminal; Translation elongation factor EFTuEF1A, domain 2; Translation elongation factor EFTuEF1A; EFTuEF1A initiation factor IF2gamma, C-terminal; P-loop containing nucleoside triphosphate hydrolase; Elongation factor, GTP-binding domain; Translation protein, beta-barrel domain; |
| F1QFC0 | hspa9   | Uncharacterized protein                             | _RFDAAEVQK(cr)DLK_       | 138  | 1 | FDDAAEVQKDLKNVPY .....K.L..... | mitochondria     | protein folding; metabolic process; cellular protein metabolic process; cellular macromolecule metabolic process; macromolecule metabolic process; protein metabolic process; primary metabolic process; cellular process; cellular metabolic process; organic substance metabolic process;                                       | ATP binding; nucleoside phosphate binding; nucleoside binding; ion binding; nucleotide binding; organic cyclic compound binding; heterocyclic compound binding; ribonucleoside binding; carbohydrate derivative binding; ribonucleoside binding; binding; purine ribonucleoside binding; anion binding; purine ribonucleoside binding; adenylyl ribonucleoside binding; adenylyl nucleotide binding; purine nucleoside binding; purine nucleotide binding; small molecule binding; purine ribonucleoside triphosphate binding;                                                                                                                                                                                                                                                                                                                                                                                        | K04043 | dnak; molecular chaperone DnaK                | dre03018 RNA degradation - Danio rerio (zebrafish); | IPR029048; IPR029047;                                                                                            | Heat shock protein 70kD, C-terminal domain; Heat shock protein 70kD, peptide-binding domain;                                                                                                                                                                                                                                        |
| Q98U7  | mylz3   | Fast skeletal muscle myosin light polypeptide 3     | _RIDFEAPLMLK(cr)TVDANQK_ | 76   | 1 | EAPLMLKTVDANQK .....K.V.....   | cytosol          |                                                                                                                                                                                                                                                                                                                                   | cation binding; metal ion binding; calcium ion binding; binding; ion binding;                                                                                                                                                                                                                                                                                                                                                                                                                                                                                                                                                                                                                                                                                                                                                                                                                                         |        |                                               | IPR011992; IPR002048;                               | EF-hand domain pair; EF-hand domain;                                                                             |                                                                                                                                                                                                                                                                                                                                     |
| Q804W0 | pvalb1  | Parvalbumin 4                                       | _SADEVK(cr)K_            | 45   | 1 | AKSADEVKKAFAID                 | cytosol          |                                                                                                                                                                                                                                                                                                                                   | cation binding; metal ion binding; calcium ion binding; binding; ion binding;                                                                                                                                                                                                                                                                                                                                                                                                                                                                                                                                                                                                                                                                                                                                                                                                                                         |        |                                               | IPR011992; IPR002048;                               | EF-hand domain pair; EF-hand domain;                                                                             |                                                                                                                                                                                                                                                                                                                                     |
| B8A561 | myhz1.2 | Uncharacterized protein                             | _SAETEK(cr)ELATM(ax)K_   | 849  | 1 | LKSAETEKELATMKE .....K.L.....  | nuclear          | intracellular organelle; intracellular non-membrane-bounded organelle; cytoskeleton part; intracellular organelle part; macromolecular complex; intracellular part; cell; actin cytoskeleton; organelle part; non-membrane-bounded organelle; organelle; cytoskeleton; cell part; intracellular; myosin complex; protein complex; | ATP binding; motor activity; nucleoside phosphate binding; nucleoside binding; ion binding; hydrolase activity, acting on acid anhydrides; hydrolase activity; nucleotide binding; nucleoside-triphosphatase activity; organic cyclic compound binding; ribonucleoside binding; carbohydrate derivative binding; pyrophosphatase activity; catalytic activity; ribonucleoside binding; binding; purine ribonucleoside binding; anion binding; purine ribonucleoside binding; adenylyl ribonucleoside binding; adenylyl nucleotide binding; purine nucleoside binding; hydrolase activity, acting on acid anhydrides, in phosphorus-containing anhydrides; purine nucleotide binding; small molecule binding; purine ribonucleoside triphosphate binding;                                                                                                                                                              | K10352 | MYH; myosin heavy chain                       | dre04530 Tight junction - Danio rerio (zebrafish);  | IPR002928; IPR004009; IPR001609; IPR027417; IPR027401;                                                           | Myosin tail; Myosin, N-terminal, SH3-like; Myosin head, motor domain; P-loop containing nucleoside triphosphate hydrolase; Myosin-like IQ motif-containing domain;                                                                                                                                                                  |

|        |          |                           |                          |     |   |                 |                     |              |                                                                                                                                                                                                                                                                                                                                                                                                                                                                                                 |                                                                                                                                                                                                                                                                                                                                                                                                                                                                                                                                                                                                                                                                                                                                                                                         |                                                                                                                                                                                                                                                                                                                                                                                                                                                                                                                                |                         |                                                    |                                                               |                                                                                                                                                                    |                                                                           |
|--------|----------|---------------------------|--------------------------|-----|---|-----------------|---------------------|--------------|-------------------------------------------------------------------------------------------------------------------------------------------------------------------------------------------------------------------------------------------------------------------------------------------------------------------------------------------------------------------------------------------------------------------------------------------------------------------------------------------------|-----------------------------------------------------------------------------------------------------------------------------------------------------------------------------------------------------------------------------------------------------------------------------------------------------------------------------------------------------------------------------------------------------------------------------------------------------------------------------------------------------------------------------------------------------------------------------------------------------------------------------------------------------------------------------------------------------------------------------------------------------------------------------------------|--------------------------------------------------------------------------------------------------------------------------------------------------------------------------------------------------------------------------------------------------------------------------------------------------------------------------------------------------------------------------------------------------------------------------------------------------------------------------------------------------------------------------------|-------------------------|----------------------------------------------------|---------------------------------------------------------------|--------------------------------------------------------------------------------------------------------------------------------------------------------------------|---------------------------------------------------------------------------|
| B8A568 | myzh.1.1 | Uncharacterized protein   | _SAETEK(cr)ELATMK_       | 849 | 1 | LKSAETEKELATMKE | .....K.L.....       | nuclear      | intracellular organelle; intracellular non-membrane-bounded organelle; cytoskeletal part; intracellular organelle part; macromolecular complex; intracellular part; cell; actin cytoskeleton; organelle part; non-membrane-bounded organelle; organelle; cytoskeleton; cell part; intracellular; myosin complex; protein complex;                                                                                                                                                               | ATP binding; motor activity; nucleoside phosphate binding; nucleoside binding; ion binding; hydrolase activity, acting on acid anhydrides; hydrolase activity; nucleotide binding; nucleoside-triphosphatase activity; organic cyclic compound binding; heterocyclic compound binding; ribonucleoside binding; carbohydrate derivative binding; pyrophosphatase activity; catalytic activity; ribonucleoside binding; binding; purine ribonucleoside binding; anion binding; purine ribonucleoside binding; adenylyl ribonucleoside binding; adenylyl nucleotide binding; purine nucleoside binding; hydrolase activity, acting on acid anhydrides, in phosphorus-containing anhydrides; purine nucleotide binding; small molecule binding; purine ribonucleoside triphosphate binding. | K10352                                                                                                                                                                                                                                                                                                                                                                                                                                                                                                                         | MYH; myosin heavy chain | dre04630 Tight junction - Danio rerio (zebrafish); | IPR002928; IPR004009; IPR001609; IPR027417; IPR027401;        | Myosin tail; Myosin, N-terminal, SH3-like; Myosin head, motor domain; P-loop containing nucleoside triphosphate hydrolase; Myosin-like IQ motif-containing domain; |                                                                           |
| B8A561 | myzh.1.2 | Uncharacterized protein   | _SAETEK(cr)ELATMK_       | 849 | 1 | LKSAETEKELATMKE | .....K.L.....       | nuclear      | intracellular organelle; intracellular non-membrane-bounded organelle; cytoskeletal part; intracellular organelle part; macromolecular complex; intracellular part; cell; actin cytoskeleton; organelle part; non-membrane-bounded organelle; organelle; cytoskeleton; cell part; intracellular; myosin complex; protein complex;                                                                                                                                                               | ATP binding; motor activity; nucleoside phosphate binding; nucleoside binding; ion binding; hydrolase activity, acting on acid anhydrides; hydrolase activity; nucleotide binding; nucleoside-triphosphatase activity; organic cyclic compound binding; heterocyclic compound binding; ribonucleoside binding; carbohydrate derivative binding; pyrophosphatase activity; catalytic activity; ribonucleoside binding; binding; purine ribonucleoside binding; anion binding; purine ribonucleoside binding; adenylyl ribonucleoside binding; adenylyl nucleotide binding; purine nucleoside binding; hydrolase activity, acting on acid anhydrides, in phosphorus-containing anhydrides; purine nucleotide binding; small molecule binding; purine ribonucleoside triphosphate binding. | K10352                                                                                                                                                                                                                                                                                                                                                                                                                                                                                                                         | MYH; myosin heavy chain | dre04630 Tight junction - Danio rerio (zebrafish); | IPR002928; IPR004009; IPR001609; IPR027417; IPR027401;        | Myosin tail; Myosin, N-terminal, SH3-like; Myosin head, motor domain; P-loop containing nucleoside triphosphate hydrolase; Myosin-like IQ motif-containing domain; |                                                                           |
| QBAWD0 | vdac2    | Uncharacterized protein   | _SAK(cr)DIFNK_           | 15  | 1 | ADLGKSAKDIFNKGY | .....K.L.....       | cytosol      | developmental process; response to wounding; tissue development; response to stress; wound healing; tissue regeneration; single-organism developmental process; fin regeneration; single-organism process; regeneration; developmental growth; response to stimulus; growth; anatomical structure development;                                                                                                                                                                                  | membrane; intracellular organelle; outer membrane; mitochondrial part; bounding membrane of organelle; organelle membrane; mitochondrial outer membrane; cytoplasm; intracellular organelle part; organelle envelope; intracellular part; cell; organelle part; mitochondrion; organelle; mitochondrial envelope; intracellular membrane-bounded organelle; intracellular; cell part; envelope; organelle outer membrane; membrane-bounded organelle; mitochondrial membrane; cytoplasmic part;                                                                                                                                                                                                                                                                                         | ion transmembrane transporter activity; passive transmembrane transporter activity; anion channel activity; substrate-specific transporter activity; channel activity; substrate-specific transmembrane transporter activity; voltage-gated ion channel activity; voltage-gated anion channel activity; substrate-specific channel activity; ion channel activity; gated channel activity; voltage-gated channel activity; transmembrane transporter activity; transporter activity; anion transmembrane transporter activity; | K15040                  | VDAC2; voltage-dependent anion channel protein 2   | dre04020 Calcium signaling pathway - Danio rerio (zebrafish); | IPR023614;                                                                                                                                                         | Porin domain;                                                             |
| B0R198 | vdac3    | Uncharacterized protein   | _SAK(cr)DIFSK_           | 40  | 1 | ADLGKSAKDIFSKGY | .....K.L.....       | cytosol      | membrane; intracellular organelle; outer membrane; mitochondrial part; bounding membrane of organelle; organelle membrane; mitochondrial outer membrane; cytoplasm; intracellular organelle part; organelle envelope; intracellular part; cell; organelle part; mitochondrion; organelle; mitochondrial envelope; intracellular membrane-bounded organelle; intracellular; cell part; envelope; organelle outer membrane; membrane-bounded organelle; mitochondrial membrane; cytoplasmic part; | ion transmembrane transporter activity; passive transmembrane transporter activity; anion channel activity; substrate-specific transporter activity; channel activity; substrate-specific transmembrane transporter activity; voltage-gated ion channel activity; voltage-gated anion channel activity; substrate-specific channel activity; ion channel activity; gated channel activity; voltage-gated channel activity; transmembrane transporter activity; transporter activity; anion transmembrane transporter activity;                                                                                                                                                                                                                                                          |                                                                                                                                                                                                                                                                                                                                                                                                                                                                                                                                |                         |                                                    |                                                               | IPR023614;                                                                                                                                                         | Porin domain;                                                             |
| E9QF69 | rp18     | 60S ribosomal protein L18 | _SDAPFNK(cr)VILR_        | 45  | 1 | RSDAPFNKVLRRFL  | .....K.L.....       | mitochondria | cellular protein metabolic process; biosynthetic process; primary metabolic process; cellular metabolic process; organic substance biosynthetic process; cellular biosynthetic process; organic substance metabolic process; metabolic process; cellular macromolecule biosynthetic process; cellular macromolecule metabolic process; gene expression; macromolecule metabolic process; protein metabolic process; macromolecule biosynthetic process; translation; cellular process;          | ribosome; organelle; intracellular organelle; intracellular non-membrane-bounded organelle; cell part; intracellular; cytoplasm; macromolecular complex; intracellular part; cell; ribonucleoprotein complex; cytoplasmic part; non-membrane-bounded organelle;                                                                                                                                                                                                                                                                                                                                                                                                                                                                                                                         | structural constituent of ribosome; structural molecule activity;                                                                                                                                                                                                                                                                                                                                                                                                                                                              |                         |                                                    |                                                               | IPR021131;                                                                                                                                                         | Ribosomal protein L18aL15P;                                               |
| F1QCC0 | tnni2b.1 | Uncharacterized protein   | _SDK(cr)EIEDLK_          | 87  | 1 | TKVAKSDEIEDLKI  | .....DK.....        | mitochondria |                                                                                                                                                                                                                                                                                                                                                                                                                                                                                                 |                                                                                                                                                                                                                                                                                                                                                                                                                                                                                                                                                                                                                                                                                                                                                                                         |                                                                                                                                                                                                                                                                                                                                                                                                                                                                                                                                |                         |                                                    |                                                               |                                                                                                                                                                    |                                                                           |
| F1QCC0 | tnni2b.1 | Uncharacterized protein   | _SKDEIEDLK(cr)IK_        | 93  | 1 | DKEIEDLKIKVQDLK | .....E.....K.....   | mitochondria |                                                                                                                                                                                                                                                                                                                                                                                                                                                                                                 |                                                                                                                                                                                                                                                                                                                                                                                                                                                                                                                                                                                                                                                                                                                                                                                         |                                                                                                                                                                                                                                                                                                                                                                                                                                                                                                                                |                         |                                                    |                                                               |                                                                                                                                                                    |                                                                           |
| Q7Z95  | rp4      | Ribosomal protein L4      | _SEEVOK(cr)AR_           | 300 | 1 | IKSEEVOKARPANR  | .....K.L.....       | cytosol      | cellular protein metabolic process; biosynthetic process; primary metabolic process; cellular metabolic process; organic substance biosynthetic process; cellular biosynthetic process; organic substance metabolic process; metabolic process; cellular macromolecule biosynthetic process; cellular macromolecule metabolic process; gene expression; macromolecule metabolic process; protein metabolic process; macromolecule biosynthetic process; translation; cellular process;          | ribosome; organelle; intracellular organelle; intracellular non-membrane-bounded organelle; cell part; intracellular; cytoplasm; macromolecular complex; intracellular part; cell; ribonucleoprotein complex; cytoplasmic part; non-membrane-bounded organelle;                                                                                                                                                                                                                                                                                                                                                                                                                                                                                                                         | structural constituent of ribosome; structural molecule activity;                                                                                                                                                                                                                                                                                                                                                                                                                                                              | K02930                  | RP-L4e; large subunit ribosomal protein L4e        | dre03010 Ribosome - Danio rerio (zebrafish);                  | IPR023574; IPR025755;                                                                                                                                              | Ribosomal protein L4 domain; 60S ribosomal protein L4, C-terminal domain; |
| E9QDY3 | cyt1     | Uncharacterized protein   | _SEITEVK(cr)R_           | 323 | 1 | RSEFEVKRTLQSL   | .....E.....K.L..... | mitochondria | intracellular organelle; intracellular non-membrane-bounded organelle; cytoskeletal part; intracellular organelle part; macromolecular complex; intracellular part; cell; organelle part; non-membrane-bounded organelle; organelle; cytoskeleton; intermediate filament cytoskeleton; cell part; intracellular; intermediate filament; protein complex;                                                                                                                                        |                                                                                                                                                                                                                                                                                                                                                                                                                                                                                                                                                                                                                                                                                                                                                                                         | structural molecule activity;                                                                                                                                                                                                                                                                                                                                                                                                                                                                                                  | K07604                  |                                                    |                                                               |                                                                                                                                                                    |                                                                           |
| E9QDY3 | cyt1     | Uncharacterized protein   | _SESLNK(cr)EAVSTETLQTSR_ | 303 | 1 | AKSESLNKEAVSTE  | .....K.V.....       | mitochondria | intracellular organelle; intracellular non-membrane-bounded organelle; cytoskeletal part; intracellular organelle part; macromolecular complex; intracellular part; cell; organelle part; non-membrane-bounded organelle; organelle; cytoskeleton; intermediate filament cytoskeleton; cell part; intracellular; intermediate filament; protein complex;                                                                                                                                        |                                                                                                                                                                                                                                                                                                                                                                                                                                                                                                                                                                                                                                                                                                                                                                                         | structural molecule activity;                                                                                                                                                                                                                                                                                                                                                                                                                                                                                                  | K07604                  |                                                    |                                                               |                                                                                                                                                                    |                                                                           |
| F1QTL9 | hnmpa0b  | Uncharacterized protein   | _SEVITDK(cr)DTGK_        | 134 | 1 | KSEVITDKDGTGKRG | .....DK.....        | nuclear      |                                                                                                                                                                                                                                                                                                                                                                                                                                                                                                 | organic cyclic compound binding; heterocyclic compound binding; nucleoside phosphate binding; binding; nucleic acid binding; nucleotide binding; small molecule binding;                                                                                                                                                                                                                                                                                                                                                                                                                                                                                                                                                                                                                | K12894                                                                                                                                                                                                                                                                                                                                                                                                                                                                                                                         |                         |                                                    | IPR000504; IPR012677;                                         | RNA recognition motif domain; Nucleoside-binding, alpha-                                                                                                           |                                                                           |

|        |         |                                 |                            |      |   |                          |               |                       |                                                                                                                                                                                                                                                                                                                                                                                                                                                                                                                                                                                                                                                                                                                                                                                                                                                                                                                                                                                                                                                                                                                                                                                                                                                    |                                                                                                                                                                                                                                                                                                                                                                                                                                                                                                                                                                                                                                                                                                                                                                                         |                                                                                                                                                                                                                                                                                                                                                                                                                                                                                                                                                                                                                                                                                                                                                                                                                                                                                                                                                                                                                                                                                                                                                                                                                                                                                                                                                                                                                                       |                         |                                                                                                                                               |                                                                                                                                                                                                                                                                                                                              |                                                                                                                                                                    |                                           |
|--------|---------|---------------------------------|----------------------------|------|---|--------------------------|---------------|-----------------------|----------------------------------------------------------------------------------------------------------------------------------------------------------------------------------------------------------------------------------------------------------------------------------------------------------------------------------------------------------------------------------------------------------------------------------------------------------------------------------------------------------------------------------------------------------------------------------------------------------------------------------------------------------------------------------------------------------------------------------------------------------------------------------------------------------------------------------------------------------------------------------------------------------------------------------------------------------------------------------------------------------------------------------------------------------------------------------------------------------------------------------------------------------------------------------------------------------------------------------------------------|-----------------------------------------------------------------------------------------------------------------------------------------------------------------------------------------------------------------------------------------------------------------------------------------------------------------------------------------------------------------------------------------------------------------------------------------------------------------------------------------------------------------------------------------------------------------------------------------------------------------------------------------------------------------------------------------------------------------------------------------------------------------------------------------|---------------------------------------------------------------------------------------------------------------------------------------------------------------------------------------------------------------------------------------------------------------------------------------------------------------------------------------------------------------------------------------------------------------------------------------------------------------------------------------------------------------------------------------------------------------------------------------------------------------------------------------------------------------------------------------------------------------------------------------------------------------------------------------------------------------------------------------------------------------------------------------------------------------------------------------------------------------------------------------------------------------------------------------------------------------------------------------------------------------------------------------------------------------------------------------------------------------------------------------------------------------------------------------------------------------------------------------------------------------------------------------------------------------------------------------|-------------------------|-----------------------------------------------------------------------------------------------------------------------------------------------|------------------------------------------------------------------------------------------------------------------------------------------------------------------------------------------------------------------------------------------------------------------------------------------------------------------------------|--------------------------------------------------------------------------------------------------------------------------------------------------------------------|-------------------------------------------|
| B8A568 | myhz1.1 | Uncharacterized protein         | ..SEYK(cr)MEIDDLSSNMEAVAK_ | 1227 | 1 | EKEKSEYKMEIDDLSSNMEAVAK_ | ..E...K.....  | nuclear               | intracellular organelle; intracellular non-membrane-bounded organelle; cytoskeleton part; intracellular organelle part; macromolecular complex; intracellular part; cell; actin cytoskeleton; organelle part; non-membrane-bounded organelle; organelle; cytoskeleton; cell part; intracellular; myosin complex; protein complex;                                                                                                                                                                                                                                                                                                                                                                                                                                                                                                                                                                                                                                                                                                                                                                                                                                                                                                                  | ATP binding; motor activity; nucleoside phosphate binding; nucleoside binding; ion binding; hydrolase activity, acting on acid anhydrides; hydrolase activity; nucleotide binding; nucleoside-triphosphatase activity; organic cyclic compound binding; heterocyclic compound binding; ribonucleoside binding; carbohydrate derivative binding; pyrophosphatase activity; catalytic activity; ribonucleoside binding; binding; purine ribonucleoside binding; anion binding; purine ribonucleoside binding; adenylyl ribonucleoside binding; adenylyl nucleotide binding; purine nucleoside binding; hydrolase activity, acting on acid anhydrides, in phosphorus-containing anhydrides; purine nucleotide binding; small molecule binding; purine ribonucleoside triphosphate binding; | K10352                                                                                                                                                                                                                                                                                                                                                                                                                                                                                                                                                                                                                                                                                                                                                                                                                                                                                                                                                                                                                                                                                                                                                                                                                                                                                                                                                                                                                                | MYH; myosin heavy chain | dre04630 Tight junction - Danio rerio (zebrafish);                                                                                            | IPR002928; IPR004009; IPR001609; IPR027417; IPR027401;                                                                                                                                                                                                                                                                       | Myosin tail; Myosin, N-terminal, SH3-like; Myosin head, motor domain; P-loop containing nucleoside triphosphate hydrolase; Myosin-like IQ motif-containing domain; |                                           |
| B8A561 | myhz1.2 | Uncharacterized protein         | ..SEYK(cr)MEIDDLSSNMEAVAK_ | 1227 | 1 | EKEKSEYKMEIDDLSSNMEAVAK_ | ..E...K.....  | nuclear               | intracellular organelle; intracellular non-membrane-bounded organelle; cytoskeleton part; intracellular organelle part; macromolecular complex; intracellular part; cell; actin cytoskeleton; organelle part; non-membrane-bounded organelle; organelle; cytoskeleton; cell part; intracellular; myosin complex; protein complex;                                                                                                                                                                                                                                                                                                                                                                                                                                                                                                                                                                                                                                                                                                                                                                                                                                                                                                                  | ATP binding; motor activity; nucleoside phosphate binding; nucleoside binding; ion binding; hydrolase activity, acting on acid anhydrides; hydrolase activity; nucleotide binding; nucleoside-triphosphatase activity; organic cyclic compound binding; heterocyclic compound binding; ribonucleoside binding; carbohydrate derivative binding; pyrophosphatase activity; catalytic activity; ribonucleoside binding; binding; purine ribonucleoside binding; anion binding; purine ribonucleoside binding; adenylyl ribonucleoside binding; adenylyl nucleotide binding; purine nucleoside binding; hydrolase activity, acting on acid anhydrides, in phosphorus-containing anhydrides; purine nucleotide binding; small molecule binding; purine ribonucleoside triphosphate binding; | K10352                                                                                                                                                                                                                                                                                                                                                                                                                                                                                                                                                                                                                                                                                                                                                                                                                                                                                                                                                                                                                                                                                                                                                                                                                                                                                                                                                                                                                                | MYH; myosin heavy chain | dre04630 Tight junction - Danio rerio (zebrafish);                                                                                            | IPR002928; IPR004009; IPR001609; IPR027417; IPR027401;                                                                                                                                                                                                                                                                       | Myosin tail; Myosin, N-terminal, SH3-like; Myosin head, motor domain; P-loop containing nucleoside triphosphate hydrolase; Myosin-like IQ motif-containing domain; |                                           |
| Q804W0 | pvalb1  | Parvalbumin 1                   | ..SFFAK(cr)VGLSAK_         | 33   | 1 | DYKSFPAKVGLSAKS          |               | cytosol               |                                                                                                                                                                                                                                                                                                                                                                                                                                                                                                                                                                                                                                                                                                                                                                                                                                                                                                                                                                                                                                                                                                                                                                                                                                                    | cation binding; metal ion binding; calcium ion binding; binding; ion binding;                                                                                                                                                                                                                                                                                                                                                                                                                                                                                                                                                                                                                                                                                                           |                                                                                                                                                                                                                                                                                                                                                                                                                                                                                                                                                                                                                                                                                                                                                                                                                                                                                                                                                                                                                                                                                                                                                                                                                                                                                                                                                                                                                                       |                         | IPR011992; IPR002048;                                                                                                                         | EF-hand domain pair; EF-hand domain;                                                                                                                                                                                                                                                                                         |                                                                                                                                                                    |                                           |
| Q5RH26 | atp5c1  | ATP synthase subunit gamma      | ..SK(cr)NIQK_              | 34   | 1 | TIRLSKIKNIQIKTK          | .....K.L..... | mitochondria          | nucleoside metabolic process; purine nucleoside metabolic process; purine ribonucleoside monophosphate metabolic process; nucleotide metabolic process; single-organism process; purine ribonucleoside biosynthetic process; nucleoside biosynthetic process; biosynthetic process; ribonucleoside monophosphate biosynthetic process; cellular metabolic process; phosphate-containing compound metabolic process; establishment of localization; ribose phosphate biosynthetic process; metabolic process; carbohydrate derivative biosynthetic process; nucleoside phosphate metabolic process; ribose phosphate metabolic process; purine nucleoside triphosphate biosynthetic process; single-organism transport; heterocycle biosynthetic process; cation transmembrane transport; purine ribonucleoside triphosphate biosynthetic process; small molecule metabolic process; ATP biosynthetic process; single-organism cellular process; purine ribonucleoside triphosphate metabolic process; organic cyclic compound metabolic process; purine-containing compound metabolic process; energy coupled proton transport, down electrochemical gradient; ribonucleoside triphosphate metabolic process; purine nucleoside metabolic process; | proton-transporting ATP synthase complex; catalytic core F1; membrane part; cell part; intracellular; proton-transporting two-sector ATPase complex; macromolecular complex; proton-transporting two-sector ATPase complex, catalytic domain; intracellular part; protein complex; cell; proton-transporting ATP synthase complex;                                                                                                                                                                                                                                                                                                                                                                                                                                                      | active transmembrane transporter activity; ATPase activity, coupled to transmembrane movement of ions; ion transmembrane transporter activity; primary active transmembrane transporter activity; ATPase activity, coupled to transmembrane movement of ions, rotational mechanism; hydrolase activity, acting on acid anhydrides; substrate-specific transporter activity; monovalent inorganic cation transmembrane transporter activity; hydrolase activity; nucleoside-triphosphatase activity; hydrogen ion transmembrane transporter activity; proton-transporting ATPase activity, rotational mechanism; substrate-specific transmembrane transporter activity; proton-transporting ATP synthase activity, rotational mechanism; ATPase activity; P-P-bond-hydrolysis-transmembrane transporter activity; pyrophosphatase activity; cation-transporting ATPase activity; ATPase activity, coupled to transmembrane movement of substances; catalytic activity; ATPase activity, coupled to movement of substances; ATPase activity, coupled; hydrogen-exporting ATPase activity; hydrolase activity, acting on acid anhydrides, catalyzing transmembrane movement of substances; inorganic cation transmembrane transporter activity; hydrolase activity, acting on acid anhydrides, in phosphorus-containing anhydrides; cation transmembrane transporter activity; transporter activity; transmembrane transporter activity; | K02136                  | ATP6F1G; F-type H+-transporting g ATPase subunit gamma                                                                                        | dre01100 Metabolic pathways - Danio rerio (zebrafish); dre00190 Oxidative phosphorylation - Danio rerio (zebrafish);                                                                                                                                                                                                         | IPR023633;                                                                                                                                                         | ATPase, F1 complex, gamma subunit domain; |
| Q58EE9 | gfap    | Glial fibrillary acidic protein | ..SK(cr)FADLDAANR_         | 272  | 1 | TEEWYRSKFADLDTA          | ..E...K.....  | mitochondria          | intracellular organelle; intracellular non-membrane-bounded organelle; cytoskeleton part; intracellular organelle part; cytoplasm; type III intermediate filament; macromolecular complex; intracellular part; cell; organelle part; non-membrane-bounded organelle; organelle; cytoskeleton; intermediate filament cytoskeleton; intracellular; cell part; intermediate filament; protein complex;                                                                                                                                                                                                                                                                                                                                                                                                                                                                                                                                                                                                                                                                                                                                                                                                                                                | structural molecule activity;                                                                                                                                                                                                                                                                                                                                                                                                                                                                                                                                                                                                                                                                                                                                                           | K05640                                                                                                                                                                                                                                                                                                                                                                                                                                                                                                                                                                                                                                                                                                                                                                                                                                                                                                                                                                                                                                                                                                                                                                                                                                                                                                                                                                                                                                |                         | IPR006821;                                                                                                                                    | Intermediate filament head, DNA-binding domain;                                                                                                                                                                                                                                                                              |                                                                                                                                                                    |                                           |
| P13104 | tpma    | Tropomyosin alpha-1 chain       | ..SK(cr)QLEDDLVALGK_       | 37   | 1 | KAAEERSKQLEDDL           | .....K.L..... | cytosol               | cytoskeleton; organelle; intracellular organelle; intracellular non-membrane-bounded organelle; cell part; intracellular; cytoplasm; intracellular part; cell; non-membrane-bounded organelle;                                                                                                                                                                                                                                                                                                                                                                                                                                                                                                                                                                                                                                                                                                                                                                                                                                                                                                                                                                                                                                                     |                                                                                                                                                                                                                                                                                                                                                                                                                                                                                                                                                                                                                                                                                                                                                                                         | K10373                                                                                                                                                                                                                                                                                                                                                                                                                                                                                                                                                                                                                                                                                                                                                                                                                                                                                                                                                                                                                                                                                                                                                                                                                                                                                                                                                                                                                                | TPM1; tropomyosin 1     | dre04261 Contractile muscle contraction - Danio rerio (zebrafish); dre04261 Adrenergic signaling in cardiomyocytes - Danio rerio (zebrafish); |                                                                                                                                                                                                                                                                                                                              |                                                                                                                                                                    |                                           |
| Q57Z29 | apobb.1 | Uncharacterized protein         | ..SK(cr)VEELSELK_          | 2104 | 1 | EYFAIKSKVEELISE          | .....K.E..... | endoplasmic reticulum | response to chemical; response to stimulus;                                                                                                                                                                                                                                                                                                                                                                                                                                                                                                                                                                                                                                                                                                                                                                                                                                                                                                                                                                                                                                                                                                                                                                                                        | lipid transporter activity; substrate-specific transporter activity; transporter activity;                                                                                                                                                                                                                                                                                                                                                                                                                                                                                                                                                                                                                                                                                              |                                                                                                                                                                                                                                                                                                                                                                                                                                                                                                                                                                                                                                                                                                                                                                                                                                                                                                                                                                                                                                                                                                                                                                                                                                                                                                                                                                                                                                       |                         | IPR011030; IPR015817; IPR015818; IPR001747; IPR015819; IPR015816; IPR016024; IPR015255; IPR009454;                                            | Vitellogen, superhelical; Vitellinogen, open beta-sheet, subdomain 1; Vitellinogen, open beta-sheet, subdomain 2; Lipid transport protein, N-terminal; Lipid transport protein, beta-sheet sheet; Vitellinogen, beta-sheet N-terminal; Armadillo-type fold; Vitellinogen, open beta-sheet; Lipid transport, open beta-sheet; |                                                                                                                                                                    |                                           |



|        |        |                                            |                               |     |   |                               |               |                                                                                                                                                                                                                                                                                                                                                                                                                                                                                                                                                                                                                                                                                                                           |                                                                                                                                                                                                                                                                                                                                                                                                                        |                                                                                                                                                                                                                                                                                                                                                                                                                                                                                                                                                                                                                                                                                                                                                                                                                                                                                                                    |        |                                                    |                                                                                 |                                                                                                               |                                                                                                                                                                                                                                                                                                                                                                                                                                                   |
|--------|--------|--------------------------------------------|-------------------------------|-----|---|-------------------------------|---------------|---------------------------------------------------------------------------------------------------------------------------------------------------------------------------------------------------------------------------------------------------------------------------------------------------------------------------------------------------------------------------------------------------------------------------------------------------------------------------------------------------------------------------------------------------------------------------------------------------------------------------------------------------------------------------------------------------------------------------|------------------------------------------------------------------------------------------------------------------------------------------------------------------------------------------------------------------------------------------------------------------------------------------------------------------------------------------------------------------------------------------------------------------------|--------------------------------------------------------------------------------------------------------------------------------------------------------------------------------------------------------------------------------------------------------------------------------------------------------------------------------------------------------------------------------------------------------------------------------------------------------------------------------------------------------------------------------------------------------------------------------------------------------------------------------------------------------------------------------------------------------------------------------------------------------------------------------------------------------------------------------------------------------------------------------------------------------------------|--------|----------------------------------------------------|---------------------------------------------------------------------------------|---------------------------------------------------------------------------------------------------------------|---------------------------------------------------------------------------------------------------------------------------------------------------------------------------------------------------------------------------------------------------------------------------------------------------------------------------------------------------------------------------------------------------------------------------------------------------|
| Q1ECX9 | pdia4  | Protein disulfide-isomerase A4             | ...SK(cr)VLEVAK_              | 434 | 1 | ATQFWRSKVLEVAKD .....K.L..... | extracellular | regulation of cellular process; regulation of biological quality; small molecule metabolic process; cell redox homeostasis; cellular protein metabolic process; single-organism cellular process; ether metabolic process; cellular homeostasis; single-organism process; primary metabolic process; cellular metabolic process; organic substance metabolic process; protein folding; homeostatic process; metabolic process; regulation of biological process; single-organism metabolic process; cellular macromolecule metabolic process; glycerol ether metabolic process; protein metabolic process; macromolecule metabolic process; cellular process; biological regulation;                                      | endoplasmic reticulum lumen; intracellular organelle; endoplasmic reticulum; cytoplasm; intracellular organelle part; endomembrane system; intracellular part; cell; organelle part; organelle; intracellular membrane-bounded organelle; membrane-enclosed lumen; intracellular organelle lumen; endoplasmic reticulum part; cell part; intracellular; membrane-bounded organelle; cytoplasmic part; organelle lumen; | protein disulfide oxidoreductase activity; disulfide oxidoreductase activity; electron carrier activity; intramolecular oxidoreductase activity; transposing S-S bonds; isomerase activity; catalytic activity; oxidoreductase activity; acting on a sulfur group of donors; intramolecular oxidoreductase activity; protein disulfide isomerase activity; oxidoreductase activity;                                                                                                                                                                                                                                                                                                                                                                                                                                                                                                                                | K09582 | PDIA4; protein disulfide-isomerase A4 [EC:5.3.4.1] | dre04141 Protein processing in endoplasmic reticulum - Danio rerio (zebrafish); | IPR005788; IPR013766; IPR012336;                                                                              | Disulphide isomerase; Thiredoxin domain; Thiredoxin-like fold;                                                                                                                                                                                                                                                                                                                                                                                    |
| Q42363 | apoa1  | Apolipoprotein A-I                         | ...SK(cr)VPMVEAVR_            | 182 | 1 | NIEETKSKVPMVEA .....K.V.....  | extracellular | cholesterol metabolic process; lipid transport; organic hydroxy compound metabolic process; alcohol metabolic process; small molecule metabolic process; steroid metabolic process; organic cyclic compound metabolic process; single-organism process; organic substance transport; lipid localization; primary metabolic process; sterol metabolic process; lipoprotein metabolic process; establishment of localization; organic substance metabolic process; transport; metabolic process; single-organism localization; single-organism metabolic process; macromolecule metabolic process; protein metabolic process; localization; macromolecule localization; single-organism transport; lipid metabolic process; | macromolecular complex; extracellular region part; extracellular space; high-density lipoprotein particle; protein-lipid complex; extracellular region; plasma lipoprotein particle;                                                                                                                                                                                                                                   | lipid binding; binding;                                                                                                                                                                                                                                                                                                                                                                                                                                                                                                                                                                                                                                                                                                                                                                                                                                                                                            | K08757 | APOA1; apolipoprotein A-I                          | dre03320 PPAR signalling pathway - Danio rerio (zebrafish);                     |                                                                                                               |                                                                                                                                                                                                                                                                                                                                                                                                                                                   |
| B8A568 | myh2.1 | Uncharacterized protein                    | ...SSVK(cr)LLATLYPPVVEETGGGK_ | 619 | 1 | LYQKSSVKLLATLYP .....K.L..... | nuclear       |                                                                                                                                                                                                                                                                                                                                                                                                                                                                                                                                                                                                                                                                                                                           | intracellular organelle; intracellular non-membrane-bounded organelle; cytoskeleton part; intracellular organelle part; macromolecular complex; intracellular part; cell; actin cytoskeleton; organelle part; non-membrane-bounded organelle; organelle; cytoskeleton; cell part; intracellular; myosin complex; protein complex;                                                                                      | ATP binding; motor activity; nucleoside phosphate binding; nucleoside binding; ion binding; hydrolase activity, acting on acid anhydrides; hydrolase activity; nucleotide binding; nucleoside-triphosphatase activity; organic cyclic compound binding; heterocyclic compound binding; ribonucleoside binding; carbohydrate derivative binding; pyrophosphatase activity; catalytic activity; ribonucleoside binding; binding; purine ribonucleoside binding; anion binding; purine ribonucleotide binding; adenylyl ribonucleotide binding; adenylyl nucleotide binding; purine nucleoside binding; hydrolase activity, acting on acid anhydrides, in phosphorus-containing anhydrides; purine nucleotide binding; small molecule binding; purine ribonucleoside triphosphate binding;                                                                                                                            | K10352 | MYH; myosin heavy chain                            | dre04530 Tight junction - Danio rerio (zebrafish);                              | IPR002928; IPR004009; IPR001609; IPR027417; IPR027401;                                                        | Myosin tail; Myosin N-terminal, SH3-like; Myosin head, motor domain; P-loop containing nucleoside triphosphate hydrolase; Myosin-like IQ motif-containing domain;                                                                                                                                                                                                                                                                                 |
| B8A561 | myh2.2 | Uncharacterized protein                    | ...SSVK(cr)LLATLYPPVVEETGGGK_ | 619 | 1 | LYQKSSVKLLATLYP .....K.L..... | nuclear       |                                                                                                                                                                                                                                                                                                                                                                                                                                                                                                                                                                                                                                                                                                                           | intracellular organelle; intracellular non-membrane-bounded organelle; cytoskeleton part; intracellular organelle part; macromolecular complex; intracellular part; cell; actin cytoskeleton; organelle part; non-membrane-bounded organelle; organelle; cytoskeleton; cell part; intracellular; myosin complex; protein complex;                                                                                      | ATP binding; motor activity; nucleoside phosphate binding; nucleoside binding; ion binding; hydrolase activity, acting on acid anhydrides; hydrolase activity; nucleotide binding; nucleoside-triphosphatase activity; organic cyclic compound binding; heterocyclic compound binding; ribonucleoside binding; carbohydrate derivative binding; pyrophosphatase activity; catalytic activity; ribonucleoside binding; binding; purine ribonucleoside binding; anion binding; purine ribonucleotide binding; adenylyl ribonucleotide binding; adenylyl nucleotide binding; purine nucleoside binding; hydrolase activity, acting on acid anhydrides, in phosphorus-containing anhydrides; purine nucleotide binding; small molecule binding; purine ribonucleoside triphosphate binding;                                                                                                                            | K10352 | MYH; myosin heavy chain                            | dre04530 Tight junction - Danio rerio (zebrafish);                              | IPR002928; IPR004009; IPR001609; IPR027417; IPR027401;                                                        | Myosin tail; Myosin N-terminal, SH3-like; Myosin head, motor domain; P-loop containing nucleoside triphosphate hydrolase; Myosin-like IQ motif-containing domain;                                                                                                                                                                                                                                                                                 |
| Q6P3J5 | eef2b  | Eukaryotic translation elongation factor 2 | ...STLTDLSVSK(cr)AGIASAR_     | 42  | 1 | LTDLSVSKAGIASA                | cytosol       |                                                                                                                                                                                                                                                                                                                                                                                                                                                                                                                                                                                                                                                                                                                           |                                                                                                                                                                                                                                                                                                                                                                                                                        | nucleoside phosphate binding; translation elongation factor activity; hydrolase activity, acting on acid anhydrides; hydrolase activity; organic cyclic compound binding; heterocyclic compound binding; pyrophosphatase activity; catalytic activity; ribonucleoside binding; binding; GTPase activity; purine ribonucleoside binding; anion binding; hydrolase activity, acting on acid anhydrides, in phosphorus-containing anhydrides; guanyl nucleotide binding; GTP binding; purine nucleoside binding; purine ribonucleoside triphosphate binding; RNA binding; ion binding; nucleoside binding; nucleotide binding; nucleoside-triphosphatase activity; ribonucleoside binding; translation factor activity; nucleic acid binding; carbohydrate derivative binding; nucleic acid binding; purine ribonucleotide binding; guanyl ribonucleotide binding; purine nucleoside binding; small molecule binding; | K03234 |                                                    |                                                                                 | IPR027417; IPR000795; IPR005517; IPR005225; IPR004161; IPR006040; IPR020568; IPR014721; IPR009022; IPR009000; | P-loop containing nucleoside triphosphate hydrolase; Elongation factor, GTP-binding domain; Translation elongation factor EFG/EF2 domain IV; Small GTP-binding protein domain; Translation elongation factor eEF1A, domain 2; Translation elongation factor EFG, V domain; Ribosomal protein S5 domain 2-type fold; Ribosomal protein S5 domain 2-type fold, subgroup; Elongation factor G, II-V domain; Translation protein, beta-barrel domain; |

|        |       |                                   |                               |      |   |                                  |              |                                                                                                                                                                                                                                                                                                                                                                                                                                                                                                                                                                                                                                                                                                                                                                                                                                                                                                                                                                                                                                                                                                                                                                                                                                                                   |                                                                                                                                                                                                                                                                                                                                                                                                                                                                                                                                                                                                                                                         |                                                                                                                                                                                                                                                                                                                                                                                                                                                                                                                                                                                                                                                                                                                                                                                      |                                                                                                                                                                                                                                            |                                                                                                                                                                                                                                                                                                   |                                                                                                                                                        |                                                                                                                                                                    |
|--------|-------|-----------------------------------|-------------------------------|------|---|----------------------------------|--------------|-------------------------------------------------------------------------------------------------------------------------------------------------------------------------------------------------------------------------------------------------------------------------------------------------------------------------------------------------------------------------------------------------------------------------------------------------------------------------------------------------------------------------------------------------------------------------------------------------------------------------------------------------------------------------------------------------------------------------------------------------------------------------------------------------------------------------------------------------------------------------------------------------------------------------------------------------------------------------------------------------------------------------------------------------------------------------------------------------------------------------------------------------------------------------------------------------------------------------------------------------------------------|---------------------------------------------------------------------------------------------------------------------------------------------------------------------------------------------------------------------------------------------------------------------------------------------------------------------------------------------------------------------------------------------------------------------------------------------------------------------------------------------------------------------------------------------------------------------------------------------------------------------------------------------------------|--------------------------------------------------------------------------------------------------------------------------------------------------------------------------------------------------------------------------------------------------------------------------------------------------------------------------------------------------------------------------------------------------------------------------------------------------------------------------------------------------------------------------------------------------------------------------------------------------------------------------------------------------------------------------------------------------------------------------------------------------------------------------------------|--------------------------------------------------------------------------------------------------------------------------------------------------------------------------------------------------------------------------------------------|---------------------------------------------------------------------------------------------------------------------------------------------------------------------------------------------------------------------------------------------------------------------------------------------------|--------------------------------------------------------------------------------------------------------------------------------------------------------|--------------------------------------------------------------------------------------------------------------------------------------------------------------------|
| Q90473 | hspa8 | Heat shock cognate 71 kDa protein | ...STVEDEK(cr)LK_             | 557  | 1 | KSTVEDEKLGKISD                   | cytosol      | developmental process; response to wounding; tissue development; response to stress; wound healing; tissue regeneration; single-organism developmental process; fin regeneration; single-organism process; regeneration; developmental growth; response to stimulus; growth; anatomical structure development;                                                                                                                                                                                                                                                                                                                                                                                                                                                                                                                                                                                                                                                                                                                                                                                                                                                                                                                                                    | ATP binding; nucleoside phosphate binding; nucleoside binding; ion binding; nucleotide binding; organic cyclic compound binding; heterocyclic compound binding; ribonucleoside binding; carbohydrate derivative binding; ribonucleotide binding; binding; purine ribonucleoside binding; anion binding; purine ribonucleotide binding; adenyl ribonucleotide binding; adenyly nucleotide binding; purine nucleoside binding; purine nucleotide binding; small molecule binding; purine ribonucleoside triphosphate binding;                                                                                                                             | K03283                                                                                                                                                                                                                                                                                                                                                                                                                                                                                                                                                                                                                                                                                                                                                                               | dra04010 MAPK signaling pathway - Danio rerio (zebrafish); dra04141 Protein processing in endoplasmic reticulum - Danio rerio (zebrafish); dra04144 Endocytosis - Danio rerio (zebrafish); dra03040 Spliceosome - Danio rerio (zebrafish); | Heat shock protein 70kD, C-terminal domain; Heat shock protein 70kD, peptide-binding domain;                                                                                                                                                                                                      |                                                                                                                                                        |                                                                                                                                                                    |
| Q6G0M9 | enc2  | Enc2 protein                      | ...TAIDK(cr)AGFTDK_           | 233  | 1 | LIKTAIDKAGFTDKV.....DK.....      | cytoskeleton | single-organism carbohydrate catabolic process; glycolytic process; single-organism catabolic process; small molecule metabolic process; single-organism cellular process; single-organism process; carbohydrate metabolic process; primary metabolic process; cellular metabolic process; organic substance metabolic process; carbohydrate catabolic process; single-organism carbohydrate metabolic process; organic substance catabolic process; metabolic process; pyruvate metabolic process; generation of precursor metabolites and energy; single-organism metabolic process; carboxylic acid metabolic process; monocarboxylic acid metabolic process; organic acid metabolic process; cellular process; catabolic process; oxoacid metabolic process;                                                                                                                                                                                                                                                                                                                                                                                                                                                                                                  | catalytic complex; cell part; intracellular; cytoplasm; macromolecular complex; intracellular part; cytosolic part; cell; cytosol; protein complex; phosphopyruvate hydratase complex; cytoplasmic part;                                                                                                                                                                                                                                                                                                                                                                                                                                                | magnesium ion binding; phosphopyruvate hydratase activity; catalytic activity; binding; ion binding; metal ion binding; cation binding; lyase activity; hydro-lyase activity; carbon-oxygen lyase activity;                                                                                                                                                                                                                                                                                                                                                                                                                                                                                                                                                                          | K01689                                                                                                                                                                                                                                     | dre00010 Glycolysis / Gluconeogenesis - Danio rerio (zebrafish); dra01230 Biosynthesis of amino acids - Danio rerio (zebrafish); dra01200 Carbon metabolism - Danio rerio (zebrafish); dra01100 Metabolic pathways - Danio rerio (zebrafish); dra03018 RNA degradation - Danio rerio (zebrafish); | ENase C-terminal; ENase C-terminal; ENase N-terminal; ENase, N-terminal;                                                                               |                                                                                                                                                                    |
| E9QBF0 | tp11b | Triosephosphate isomerase         | ...TASPOQAQVHDK(cr)LR_        | 194  | 1 | QAQVHDKLRQW___                   | cytosol      | carbohydrate biosynthetic process; glycolytic process; hexose biosynthetic process; single-organism process; biosynthetic process; monosaccharide biosynthetic process; cellular metabolic process; organic substance metabolic process; glucose metabolic process; pyruvate metabolic process; metabolic process; gluconeogenesis; generation of precursor metabolites and energy; monosaccharide metabolic process; monocarboxylic acid metabolic process; cellular process; single-organism carbohydrate catabolic process; single-organism biosynthetic process; single-organism catabolic process; small molecule metabolic process; single-organism cellular process; carbohydrate metabolic process; primary metabolic process; organic substance biosynthetic process; carbohydrate catabolic process; single-organism carbohydrate metabolic process; organic substance catabolic process; single-organism metabolic process; carboxylic acid metabolic process; organic acid metabolic process; catabolic process; oxoacid metabolic process; hexose metabolic process;                                                                                                                                                                                 | isomerase activity; intramolecular oxidoreductase activity; triose-phosphate isomerase activity; catalytic activity; intramolecular oxidoreductase activity; interconverting aldoses and ketoses;                                                                                                                                                                                                                                                                                                                                                                                                                                                       |                                                                                                                                                                                                                                                                                                                                                                                                                                                                                                                                                                                                                                                                                                                                                                                      | IPR013785;                                                                                                                                                                                                                                 | Aldolase-type TIM barrel;                                                                                                                                                                                                                                                                         |                                                                                                                                                        |                                                                                                                                                                    |
| AZBHA3 | ckma  | Uncharacterized protein           | ...TDLNFENLK(cr)GGDLLPNVYLSR_ | 116  | 1 | DLNFENLKGDDLLDP                  | cytosol      |                                                                                                                                                                                                                                                                                                                                                                                                                                                                                                                                                                                                                                                                                                                                                                                                                                                                                                                                                                                                                                                                                                                                                                                                                                                                   | ATP binding; nucleoside phosphate binding; nucleoside binding; ion binding; nucleotide binding; organic cyclic compound binding; heterocyclic compound binding; ribonucleoside binding; carbohydrate derivative binding; kinase activity; catalytic activity; ribonucleotide binding; binding; purine ribonucleoside binding; anion binding; purine ribonucleotide binding; adenyl ribonucleotide binding; adenyly nucleotide binding; purine nucleoside binding; transferase activity; transferase activity, transferring phosphorus-containing groups; purine nucleotide binding; small molecule binding; purine ribonucleoside triphosphate binding; | E2.7.3.2: creatine kinase [EC:2.7.3.2]                                                                                                                                                                                                                                                                                                                                                                                                                                                                                                                                                                                                                                                                                                                                               | dre00330 Arginine and proline metabolism - Danio rerio (zebrafish); dra01100 Metabolic pathways - Danio rerio (zebrafish);                                                                                                                 | IPR022413; IPR022414; IPR014746;                                                                                                                                                                                                                                                                  | ATP/guanido phosphotransferase, N-terminal; ATP/guanido phosphotransferase, catalytic domain; Glutamine synthetase/guanidino kinase, catalytic domain; |                                                                                                                                                                    |
| F1QIR4 |       | Uncharacterized protein           | ...TEELEDK(cr)K_              | 1393 | 1 | TEELEDKAKKLAQRL.....E.....K..... | cytosol      | cellular component biogenesis; muscle cell development; single-multicellular organism process; cellular component organization; muscle system process; cellular developmental process; cellular component morphogenesis; single-organism process; actin filament organization; cell development; anatomical structure morphogenesis; cell differentiation; actin cytoskeleton organization; muscle contraction; cellular component assembly; organelle assembly; macromolecular complex assembly; myofibril assembly; musculoskeletal movement; slow-twitch skeletal muscle fiber contraction; muscle structure development; cytoskeleton organization; anatomical structure formation involved in morphogenesis; cellular process; striated muscle myosin thick filament assembly; protein complex assembly; cellular protein complex assembly; skeletal muscle thin filament assembly; developmental process; cellular macromolecular complex assembly; striated muscle cell differentiation; actomyosin structure organization; system process; protein complex subunit organization; multicellular organismal movement; single-organism cellular process; cellular component assembly involved in morphogenesis; striated muscle contraction; myosin filament | intracellular organelle; intracellular non-membrane-bounded organelle; cytoskeletal part; intracellular organelle part; macromolecular complex; intracellular part; cell; actin cytoskeleton; organelle part; non-membrane-bounded organelle; organelle; cytoskeleton; cell part; intracellular; myosin complex; protein complex;                                                                                                                                                                                                                                                                                                                       | ATP binding; motor activity; nucleoside phosphate binding; nucleoside binding; ion binding; hydrolase activity, acting on acid anhydrides; hydrolase activity; nucleotide binding; nucleoside-triphosphatase activity; organic cyclic compound binding; heterocyclic compound binding; ribonucleoside binding; carbohydrate derivative binding; pyrophosphatase activity; catalytic activity; ribonucleotide binding; binding; purine ribonucleoside binding; anion binding; purine ribonucleotide binding; adenyl ribonucleotide binding; adenyly nucleotide binding; purine nucleoside binding; hydrolase activity, acting on acid anhydrides, in phosphorus-containing anhydrides; purine nucleotide binding; small molecule binding; purine ribonucleoside triphosphate binding; | K10352                                                                                                                                                                                                                                     | MYH; myosin heavy chain                                                                                                                                                                                                                                                                           | dre04530 Tight junction - Danio rerio (zebrafish);                                                                                                     | Myosin tail; Myosin, N-terminal, SH3-like; P-loop containing nucleoside triphosphate hydrolase; Myosin head, motor domain; Myosin-like IQ motif-containing domain; |

|        |                |                           |                        |      |   |                              |               |                                                                                                                                                                                                                                                                                                                                                                                                                       |        |                                              |                                                                                                                                           |                                                                                                |                                                                                                                                                                                                                                                                                                                                                              |
|--------|----------------|---------------------------|------------------------|------|---|------------------------------|---------------|-----------------------------------------------------------------------------------------------------------------------------------------------------------------------------------------------------------------------------------------------------------------------------------------------------------------------------------------------------------------------------------------------------------------------|--------|----------------------------------------------|-------------------------------------------------------------------------------------------------------------------------------------------|------------------------------------------------------------------------------------------------|--------------------------------------------------------------------------------------------------------------------------------------------------------------------------------------------------------------------------------------------------------------------------------------------------------------------------------------------------------------|
| X1WF87 | myhb           | Uncharacterized protein   | ...TEELEAK(cr)K_       | 1392 | 1 | TEELEAKKKLAQRL...E...K.....  | cytosol       |                                                                                                                                                                                                                                                                                                                                                                                                                       | K10352 | MYH;<br>myosin heavy chain                   | dre04530 Tight junction - Danio rerio (zebrafish);                                                                                        | IPR002928;<br>IPR004009;<br>IPR027417;<br>IPR001609;<br>IPR027401;                             | Myosin tail; Myosin, N-terminal, SH3-like; P-loop containing nucleoside triphosphate hydrolase; Myosin head, motor domain; Myosin-like IQ motif-containing domain;                                                                                                                                                                                           |
| B8A568 | myhz1.1        | Uncharacterized protein   | ...TEELESK(cr)K_       | 1392 | 1 | TEELESKKKLAQRL...E...K.....  | nuclear       | intracellular organelle; intracellular non-membrane-bounded organelle; cytoskeleton part; intracellular organelle part; macromolecular complex; intracellular part; cell; actin cytoskeleton; organelle part; non-membrane-bounded organelle; organelle; cytoskeleton; cell part; intracellular; myosin complex; protein complex;                                                                                     | K10352 | MYH;<br>myosin heavy chain                   | dre04530 Tight junction - Danio rerio (zebrafish);                                                                                        | IPR002928;<br>IPR004009;<br>IPR001609;<br>IPR027417;<br>IPR027401;                             | Myosin tail; Myosin, N-terminal, SH3-like; Myosin head, motor domain; P-loop containing nucleoside triphosphate hydrolase; Myosin-like IQ motif-containing domain;                                                                                                                                                                                           |
| B8A561 | myhz1.2        | Uncharacterized protein   | ...TEELESK(cr)K_       | 1392 | 1 | TEELESKKKLAQRL...E...K.....  | nuclear       | intracellular organelle; intracellular non-membrane-bounded organelle; cytoskeleton part; intracellular organelle part; macromolecular complex; intracellular part; cell; actin cytoskeleton; organelle part; non-membrane-bounded organelle; organelle; cytoskeleton; cell part; intracellular; myosin complex; protein complex;                                                                                     | K10352 | MYH;<br>myosin heavy chain                   | dre04530 Tight junction - Danio rerio (zebrafish);                                                                                        | IPR002928;<br>IPR004009;<br>IPR001609;<br>IPR027417;<br>IPR027401;                             | Myosin tail; Myosin, N-terminal, SH3-like; Myosin head, motor domain; P-loop containing nucleoside triphosphate hydrolase; Myosin-like IQ motif-containing domain;                                                                                                                                                                                           |
| E7EYE1 | sidkey-78p20.4 | Uncharacterized protein   | ...TELNYELEK(cr)GHVR_  | 826  | 1 | LNVELEKGHVRFVW               | nuclear       |                                                                                                                                                                                                                                                                                                                                                                                                                       |        |                                              |                                                                                                                                           | IPR003598;<br>IPR007110;<br>IPR013783;<br>IPR003599;<br>IPR003961;<br>IPR013098;               | Immunoglobulin subtype 2; Immunoglobulin-like domain; Immunoglobulin-like fold; Immunoglobulin subtype; Fibronectin, type III; Immunoglobulin I-set;                                                                                                                                                                                                         |
| Q6IMW7 | pvalb4         | Parvalbumin 4             | ...TLFK(cr)AGDSGDGK_   | 88   | 1 | GETKTLFKAGDSGDG              | cytosol       |                                                                                                                                                                                                                                                                                                                                                                                                                       |        |                                              |                                                                                                                                           | IPR011992;<br>IPR002048;                                                                       | EF-hand domain pair; EF-hand domain;                                                                                                                                                                                                                                                                                                                         |
| Q503V2 | apoea          | Uncharacterized protein   | ...THMEEAK(cr)DR_      | 116  | 1 | RTHMEEAKDRVTEY               | extracellular | lipid transport; single-organism process; lipid localization; organic substance transport; primary metabolic process; lipoprotein metabolic process; organic substance metabolic process; establishment of localization; transport; metabolic process; single-organism localization; protein metabolic process; macromolecule metabolic process; localization; macromolecule localization; single-organism transport; | K04524 |                                              |                                                                                                                                           |                                                                                                | lipid binding; binding;                                                                                                                                                                                                                                                                                                                                      |
| Q68EH0 | gsp1           | Uncharacterized protein   | ...TAIGK(cr)VLK_       | 555  | 1 | GKTAIGKVLKLVPE.....K.L.....  | cytosol       |                                                                                                                                                                                                                                                                                                                                                                                                                       | K03267 | ERF3; peptide chain release factor subunit 3 | dre03015 mRNA surveillance pathway - Danio rerio (zebrafish);                                                                             | IPR004160;<br>IPR004161;<br>IPR027417;<br>IPR009001;<br>IPR000795;<br>IPR009818;<br>IPR009000; | Translation elongation factor EFTu/Ef1A, C-terminal; Translation elongation factor EFTu/Ef1A domain 2; P-loop containing nucleoside triphosphate hydrolase; Translation elongation factor EFTu/Ef1A domain 1; Translation factor IF2gamma, C-terminal; Elongation factor, GTP-binding domain; Ataxin-2, C-terminal; Translation protein, beta-barrel domain; |
| P13104 | tpma           | Tropomyosin alpha-1 chain | ...TIDLEDELYAQK(cr)LK_ | 264  | 1 | EDELYAQKLYKKAIS...E...K..... | cytosol       | cytoskeleton; organelle; intracellular organelle; intracellular non-membrane-bounded organelle; cell part; intracellular; cytoplasm; intracellular part; cell; non-membrane-bounded organelle;                                                                                                                                                                                                                        | K10373 | TPM1; tropomyosin 1                          | dre04260 Carotid muscle contraction - Danio rerio (zebrafish); dre04261 Adrenergic signaling in cardiomyocytes - Danio rerio (zebrafish); |                                                                                                |                                                                                                                                                                                                                                                                                                                                                              |

|        |         |                                         |                           |      |   |                                |                  |                                                                                                                                                                                                                                                                                                                                                                                                                                                                                                                                                                                                                                                                                                                                                                                                                                                                                                                                                                                                                                                                                                                                                                                                                                                                   |                                                                                                                                                                                                                                                                                                                                                                                                                                                                                                                                                                                                                                                                                                                                                                                                                                                                                                                    |        |                                                    |                                                                                 |                                                                   |                                                                                                                                                                                                                                                                                                                              |
|--------|---------|-----------------------------------------|---------------------------|------|---|--------------------------------|------------------|-------------------------------------------------------------------------------------------------------------------------------------------------------------------------------------------------------------------------------------------------------------------------------------------------------------------------------------------------------------------------------------------------------------------------------------------------------------------------------------------------------------------------------------------------------------------------------------------------------------------------------------------------------------------------------------------------------------------------------------------------------------------------------------------------------------------------------------------------------------------------------------------------------------------------------------------------------------------------------------------------------------------------------------------------------------------------------------------------------------------------------------------------------------------------------------------------------------------------------------------------------------------|--------------------------------------------------------------------------------------------------------------------------------------------------------------------------------------------------------------------------------------------------------------------------------------------------------------------------------------------------------------------------------------------------------------------------------------------------------------------------------------------------------------------------------------------------------------------------------------------------------------------------------------------------------------------------------------------------------------------------------------------------------------------------------------------------------------------------------------------------------------------------------------------------------------------|--------|----------------------------------------------------|---------------------------------------------------------------------------------|-------------------------------------------------------------------|------------------------------------------------------------------------------------------------------------------------------------------------------------------------------------------------------------------------------------------------------------------------------------------------------------------------------|
| Q92005 | eef1a   | Elongation factor 1-alpha               | ...TIEK(cr)FEK_           | 41   | 1 | IDKRTEKFEKEAAE .....K.E.....   | cytosol          | intracellular part; cell; cell part; intracellular cytoplasm;                                                                                                                                                                                                                                                                                                                                                                                                                                                                                                                                                                                                                                                                                                                                                                                                                                                                                                                                                                                                                                                                                                                                                                                                     | nucleoside phosphate binding; translation elongation factor activity; hydrolase activity, acting on acid anhydrides; hydrolase activity; organic cyclic compound binding; heterocyclic compound binding; pyrophosphatase activity; catalytic activity; ribonucleotide binding; binding; GTPase activity; purine ribonucleotide binding; anion binding; hydrolase activity, acting on acid anhydrides, in phosphorus-containing anhydrides; guanyl nucleotide binding; GTP binding; purine nucleotide binding; purine ribonucleoside triphosphate binding; RNA binding; ion binding; nucleoside binding; nucleoside binding; nucleoside-triphosphatase activity; ribonucleoside binding; translation factor activity, nucleic acid binding; carbohydrate derivative binding; nucleic acid binding; purine ribonucleoside binding; guanyl ribonucleoside binding; purine nucleoside binding; small molecule binding; | K03231 | EEF1A; elongation factor 1-alpha                   | dre03013 RNA transport - Danio rerio (zebrafish);                               | IPR004160; IPR004161; IPR009001; IPR027417; IPR000795; IPR009000; | Translation elongation factor EFTu/EF1A, C-terminal; Translation elongation factor EFTu/EF1A, domain 2; Translation elongation factor EFTu/EF1A/initiation factor IF2gamma, C-terminal; P-loop containing nucleoside triphosphate hydrolase; Elongation factor, GTP-binding domain; Translation protein, beta-barrel domain; |
| F1QIR4 | -       | Uncharacterized protein                 | ...TINDFTMKQ(cr)AK_       | 1280 | 1 | INDFTMKAKLQTEN                 | cytosol          | cellular component biogenesis; muscle cell development; single-multicellular organism process; cellular component organization; muscle system process; cellular developmental process; cellular component morphogenesis; single-organism process; actin filament organization; cell development; anatomical structure morphogenesis; cell differentiation; actin cytoskeleton organization; muscle contraction; cellular component assembly; organelle assembly; macromolecular complex assembly; myofibril assembly; musculoskeletal movement; slow-twitch skeletal muscle fiber contraction; muscle structure development; cytoskeleton organization; anatomical structure formation involved in morphogenesis; cellular process; striated muscle myosin thick filament assembly; protein complex assembly; cellular protein complex assembly; skeletal muscle thin filament assembly; developmental process; cellular macromolecular complex assembly; striated muscle cell differentiation; actomyosin structure organization; system process; protein complex subunit organization; multicellular organismal movement; single-organism cellular process; cellular component assembly involved in morphogenesis; striated muscle contraction; myosin filament | ATP binding; motor activity; nucleoside phosphate binding; nucleoside binding; ion binding; hydrolase activity, acting on acid anhydrides; hydrolase activity; nucleoside binding; nucleoside-triphosphatase activity; organic cyclic compound binding; heterocyclic compound binding; ribonucleoside binding; carbohydrate derivative binding; pyrophosphatase activity; catalytic activity; ribonucleotide binding; binding; purine ribonucleoside binding; anion binding; purine ribonucleoside binding; adenylyl ribonucleotide binding; adenylyl nucleotide binding; purine nucleoside binding; hydrolase activity, acting on acid anhydrides, in phosphorus-containing anhydrides; purine nucleotide binding; small molecule binding; purine ribonucleoside triphosphate binding;                                                                                                                            | K10352 | MYH; myosin heavy chain                            | dre04530 Tight junction - Danio rerio (zebrafish);                              | IPR002928; IPR004009; IPR027417; IPR001609; IPR027401;            | Myosin tail; Myosin, N-terminal, SH3-like; P-loop containing nucleoside triphosphate hydrolase; Myosin head, motor domain; Myosin-like IQ motif-containing domain;                                                                                                                                                           |
| B0R193 | ubb     | Uncharacterized protein                 | ...TITLEVPSDTIENVK(cr)AK_ | 27   | 1 | SDTIENVKAKIQDKE                | cytosol, nuclear |                                                                                                                                                                                                                                                                                                                                                                                                                                                                                                                                                                                                                                                                                                                                                                                                                                                                                                                                                                                                                                                                                                                                                                                                                                                                   |                                                                                                                                                                                                                                                                                                                                                                                                                                                                                                                                                                                                                                                                                                                                                                                                                                                                                                                    |        |                                                    | IPR029071; IPR000626;                                                           | Ubiquitin-related domain; Ubiquitin-like;                         |                                                                                                                                                                                                                                                                                                                              |
| B8AA47 | syncga  | Gamma-synuclein                         | TK(cr)JAGVEEAAAK          | 23   | 1 | VAAAEKTKAGVEEAA                | cytosol          |                                                                                                                                                                                                                                                                                                                                                                                                                                                                                                                                                                                                                                                                                                                                                                                                                                                                                                                                                                                                                                                                                                                                                                                                                                                                   |                                                                                                                                                                                                                                                                                                                                                                                                                                                                                                                                                                                                                                                                                                                                                                                                                                                                                                                    |        |                                                    |                                                                                 |                                                                   |                                                                                                                                                                                                                                                                                                                              |
| F1RBP5 | -       | Uncharacterized protein                 | TK(cr)JAGVEEAAAK          | 23   | 1 | VAAAEKTKAGVEEAA                | cytosol          |                                                                                                                                                                                                                                                                                                                                                                                                                                                                                                                                                                                                                                                                                                                                                                                                                                                                                                                                                                                                                                                                                                                                                                                                                                                                   |                                                                                                                                                                                                                                                                                                                                                                                                                                                                                                                                                                                                                                                                                                                                                                                                                                                                                                                    |        |                                                    |                                                                                 |                                                                   |                                                                                                                                                                                                                                                                                                                              |
| E9QIC5 | srsf1a  | Serine/arginine-rich-splicing factor 1A | ...TK(cr)DVEDVFYK_        | 29   | 1 | LPPDIRTKDVEDVFY .....K.V.....  | extracellular    |                                                                                                                                                                                                                                                                                                                                                                                                                                                                                                                                                                                                                                                                                                                                                                                                                                                                                                                                                                                                                                                                                                                                                                                                                                                                   | organic cyclic compound binding; heterocyclic compound binding; nucleoside phosphate binding; binding; nucleic acid binding; nucleotide binding; small molecule binding;                                                                                                                                                                                                                                                                                                                                                                                                                                                                                                                                                                                                                                                                                                                                           |        |                                                    | IPR000504; IPR012677;                                                           | RNA recognition motif domain; Nucleoside-binding, alpha-          |                                                                                                                                                                                                                                                                                                                              |
| Q6ZM50 | capza1b | Sl:dkcy-16k6.1                          | ...TK(cr)IDWNK_           | 268  | 1 | QLPVTRTKIDWNKL                 | cytosol          | cellular component organization; single-organism organelle organization; actin cytoskeleton organization; organelle organization; actin filament-based process; single-organism cellular process; single-organism process; cytoskeleton organization; cellular process; cellular component organization or biogenesis;                                                                                                                                                                                                                                                                                                                                                                                                                                                                                                                                                                                                                                                                                                                                                                                                                                                                                                                                            | intracellular organelle; intracellular non-membrane-bounded organelle; cytoskeletal part; intracellular organelle part; F-actin capping protein complex; macromolecular complex; intracellular part; cell; actin cytoskeleton; organelle part; non-membrane-bounded organelle; organelle; cytoskeleton; cell part; intracellular; protein complex;                                                                                                                                                                                                                                                                                                                                                                                                                                                                                                                                                                 | K10364 |                                                    |                                                                                 |                                                                   |                                                                                                                                                                                                                                                                                                                              |
| Q90Z10 | rpl13   | 60S ribosomal protein L13               | ...TK(cr)LIFFPR_          | 123  | 1 | RLKEYRTKLIFFRK .....K.L.L....  | cytosol          | ribosome; organelle; intracellular organelle; intracellular non-membrane-bounded organelle; cell part; intracellular cytoplasm; macromolecular complex; intracellular part; cell; ribonucleoprotein complex; cytoplasmic part; non-membrane-bounded organelle;                                                                                                                                                                                                                                                                                                                                                                                                                                                                                                                                                                                                                                                                                                                                                                                                                                                                                                                                                                                                    | structural constituent of ribosome; structural molecule activity;                                                                                                                                                                                                                                                                                                                                                                                                                                                                                                                                                                                                                                                                                                                                                                                                                                                  | K02873 | RP-L13e; large subunit ribosomal protein L13e      | dre03010 Ribosome - Danio rerio (zebrafish);                                    |                                                                   |                                                                                                                                                                                                                                                                                                                              |
| B0S64  | -       | Protein disulfide-isomerase             | ...TLDGFTK(r)FLESGGK_     | 466  | 1 | RTLDTGFTKLESGGK .....K.L.L.... | extracellular    | regulation of cellular process; regulation of biological quality; small molecule metabolic process; cell redox homeostasis; single-organism cellular process; other metabolic process; cellular homeostasis; single-organism process; organic substance metabolic process; homeostatic process; metabolic process; regulation of biological process; single-organism metabolic process; glycerol ether metabolic process; cellular process; biological regulation;                                                                                                                                                                                                                                                                                                                                                                                                                                                                                                                                                                                                                                                                                                                                                                                                | organelle; intracellular membrane-bounded organelle; intracellular organelle; endoplasmic reticulum; cell part; intracellular; cytoplasm; endomembrane system; macromolecular complex; intracellular part; membrane-bounded organelle; cell; protein complex; collagen trimer; cytoplasmic part;                                                                                                                                                                                                                                                                                                                                                                                                                                                                                                                                                                                                                   | K09580 | PDIA1; protein disulfide-isomerase A1 [EC:5.3.4.1] | dre04141 Protein processing in endoplasmic reticulum - Danio rerio (zebrafish); | IPR005788; IPR013765; IPR012336;                                  | Disulfide isomerase; Thioredoxin domain; Thioredoxin-like fold;                                                                                                                                                                                                                                                              |

|        |         |                                 |                       |      |   |                              |                 |                                                                                                                                                                                                                                                                                                                                                                                                                                                                                                                                                                                                                                          |                                                                                                                                                                                                                                                                                                                                                                                                                                                                                                                                                                                                                                                                                                                                                                                         |                                                                                                                                         |                                                     |                                                                                                                                                                                                                                                                                                                                                                                                                                                                 |                                                        |                                                                                                                                                                                               |
|--------|---------|---------------------------------|-----------------------|------|---|------------------------------|-----------------|------------------------------------------------------------------------------------------------------------------------------------------------------------------------------------------------------------------------------------------------------------------------------------------------------------------------------------------------------------------------------------------------------------------------------------------------------------------------------------------------------------------------------------------------------------------------------------------------------------------------------------------|-----------------------------------------------------------------------------------------------------------------------------------------------------------------------------------------------------------------------------------------------------------------------------------------------------------------------------------------------------------------------------------------------------------------------------------------------------------------------------------------------------------------------------------------------------------------------------------------------------------------------------------------------------------------------------------------------------------------------------------------------------------------------------------------|-----------------------------------------------------------------------------------------------------------------------------------------|-----------------------------------------------------|-----------------------------------------------------------------------------------------------------------------------------------------------------------------------------------------------------------------------------------------------------------------------------------------------------------------------------------------------------------------------------------------------------------------------------------------------------------------|--------------------------------------------------------|-----------------------------------------------------------------------------------------------------------------------------------------------------------------------------------------------|
| B8A568 | myhz1.1 | Uncharacterized protein         | _TLEDQLSEK(cr)SK_     | 1262 | 1 | EDQLSEIKSKNDENL              | nuclear         | intracellular organelle; intracellular non-membrane-bounded organelle; cytoskeleton part; intracellular organelle part; macromolecular complex; intracellular part; cell; actin cytoskeleton; organelle part; non-membrane-bounded organelle; organelle; cytoskeleton; cell part; intracellular; myosin complex; protein complex;                                                                                                                                                                                                                                                                                                        | ATP binding; motor activity; nucleoside phosphate binding; nucleoside binding; ion binding; hydrolase activity, acting on acid anhydrides; hydrolase activity; nucleotide binding; nucleoside-triphosphatase activity; organic cyclic compound binding; heterocyclic compound binding; ribonucleoside binding; carbohydrate derivative binding; pyrophosphatase activity; catalytic activity; ribonucleotide binding; binding; purine ribonucleoside binding; anion binding; purine ribonucleotide binding; adenylyl ribonucleotide binding; adenylyl nucleotide binding; purine nucleoside binding; hydrolase activity, acting on acid anhydrides, in phosphorus-containing anhydrides; purine nucleotide binding; small molecule binding; purine ribonucleoside triphosphate binding; | K10352                                                                                                                                  | MYH; myosin heavy chain                             | dre04630 Tight junction - Danio rerio (zebrafish);                                                                                                                                                                                                                                                                                                                                                                                                              | IPR002928; IPR004009; IPR001609; IPR027417; IPR027401; | Myosin tail; Myosin, N-terminal, SH3-like; Myosin head, motor domain; P-loop containing nucleoside triphosphate hydrolase; Myosin-like IQ motif-containing domain;                            |
| B8A561 | myhz1.2 | Uncharacterized protein         | _TLEDQLSEK(cr)SK_     | 1262 | 1 | EDQLSEIKSKNDENL              | nuclear         | intracellular organelle; intracellular non-membrane-bounded organelle; cytoskeleton part; intracellular organelle part; macromolecular complex; intracellular part; cell; actin cytoskeleton; organelle part; non-membrane-bounded organelle; organelle; cytoskeleton; cell part; intracellular; myosin complex; protein complex;                                                                                                                                                                                                                                                                                                        | ATP binding; motor activity; nucleoside phosphate binding; nucleoside binding; ion binding; hydrolase activity, acting on acid anhydrides; hydrolase activity; nucleotide binding; nucleoside-triphosphatase activity; organic cyclic compound binding; heterocyclic compound binding; ribonucleoside binding; carbohydrate derivative binding; pyrophosphatase activity; catalytic activity; ribonucleotide binding; binding; purine ribonucleoside binding; anion binding; purine ribonucleotide binding; adenylyl ribonucleotide binding; adenylyl nucleotide binding; purine nucleoside binding; hydrolase activity, acting on acid anhydrides, in phosphorus-containing anhydrides; purine nucleotide binding; small molecule binding; purine ribonucleoside triphosphate binding; | K10352                                                                                                                                  | MYH; myosin heavy chain                             | dre04630 Tight junction - Danio rerio (zebrafish);                                                                                                                                                                                                                                                                                                                                                                                                              | IPR002928; IPR004009; IPR001609; IPR027417; IPR027401; | Myosin tail; Myosin, N-terminal, SH3-like; Myosin head, motor domain; P-loop containing nucleoside triphosphate hydrolase; Myosin-like IQ motif-containing domain;                            |
| Q9IBU9 | tnn3a   | Fast skeletal muscle troponin T | _TLESEK(cr)FEHMER     | 192  | 1 | IKTLESEKFEHMERL.....K.E..... | nuclear         |                                                                                                                                                                                                                                                                                                                                                                                                                                                                                                                                                                                                                                          |                                                                                                                                                                                                                                                                                                                                                                                                                                                                                                                                                                                                                                                                                                                                                                                         |                                                                                                                                         |                                                     |                                                                                                                                                                                                                                                                                                                                                                                                                                                                 |                                                        |                                                                                                                                                                                               |
| Q6P5L3 | rp19    | 60S ribosomal protein L19       | _TLSK(cr)EDET_K_      | 190  | 1 | EIKTSLKSEDETKK_              | cytosol         | ribosome; organelle; intracellular organelle; intracellular non-membrane-bounded organelle; cell part; intracellular; cytoplasm; macromolecular complex; intracellular part; cell; ribonucleoprotein complex; cytoplasmic part; non-membrane-bounded organelle;                                                                                                                                                                                                                                                                                                                                                                          | structural constituent of ribosome; structural molecule activity;                                                                                                                                                                                                                                                                                                                                                                                                                                                                                                                                                                                                                                                                                                                       | K02885                                                                                                                                  | RP-L19e; large subunit ribosomal protein L19e       | dre03010 Ribosome - Danio rerio (zebrafish);                                                                                                                                                                                                                                                                                                                                                                                                                    | IPR000196; IPR015974; IPR015972;                       | Ribosomal protein L19L19e domain; Ribosomal protein L19L19e, domain 3; Ribosomal protein L19L19e, domain 1;                                                                                   |
| E7FF12 | -       | Uncharacterized protein         | _TMATEK(cr)LLK_       | 163  | 1 | MRTMATEKLLKAMPA.....K.L..... | cytosol,nuclear | cellular component biogenesis; vesicle coating; cellular component organization; cellular macromolecular complex assembly; protein complex subunit organization; vesicle-mediated transport; vesicle organization; clathrin coat assembly; establishment of localization; macromolecular complex subunit organization; transport; cellular component assembly; organelle organization; macromolecular complex assembly; membrane budding; membrane organization; localization; protein complex biogenesis; cellular process; protein complex assembly; cellular component organization or biogenesis; cellular protein complex assembly; | membrane; membrane part; cell part; intracellular; coated membrane; cytoplasm; clathrin coat; macromolecular complex; membrane coat; intracellular part; protein complex; cell; cytoplasmic part;                                                                                                                                                                                                                                                                                                                                                                                                                                                                                                                                                                                       | 1-phosphatidylinositol binding; binding; phospholipid binding; phosphatidylinositol binding; ion binding; lipid binding; anion binding; |                                                     |                                                                                                                                                                                                                                                                                                                                                                                                                                                                 | IPR013809; IPR011417; IPR008942; IPR014712;            | Epsin-like, N-terminal; AP180 N-terminal homology (ANTH) domain; ENTH/VHS; Clathrin adaptor, phosphoinositide-binding, GAT-like;                                                              |
| Q7ZV77 | psma4   | Proteasome subunit alpha type   | _TMDVSK(cr)LSAEK_     | 205  | 1 | NKTMDSKLSAEKVE               | mitochondria    | intracellular organelle; proteasome core complex; alpha-subunit complex; proteasome complex; cytoplasm; macromolecular complex; intracellular part; cell; intracellular membrane-bounded organelle; organelle; nucleus; intracellular; cell part; proteasome core complex; membrane-bounded organelle; protein complex;                                                                                                                                                                                                                                                                                                                  | endopeptidase activity; threonine-type endopeptidase activity; peptidase activity; catalytic activity; threonine-type peptidase activity; peptidase activity; acting on L-amino acid peptides; hydrolase activity;                                                                                                                                                                                                                                                                                                                                                                                                                                                                                                                                                                      | K02728                                                                                                                                  | PSMA4; 20S proteasome subunit alpha 3 [EC:3.4.25.1] | dre03050 Proteasome - Danio rerio (zebrafish);                                                                                                                                                                                                                                                                                                                                                                                                                  | IPR029055; IPR000426;                                  | Nucleophile aminohydrolases, N-terminal; Proteasome alpha-subunit, N-terminal domain;                                                                                                         |
| Q6TNU6 | dlhd    | Dihydropyridyl dehydrogenase    | _TNADTDLGVK(cr)ILSHK_ | 438  | 1 | ADTDLGVKILSHKDT.....K.L..... | mitochondria    | intracellular part; cell; cell part; intracellular; cytoplasm;                                                                                                                                                                                                                                                                                                                                                                                                                                                                                                                                                                           | dihydropyridyl dehydrogenase activity; oxidoreductase activity, acting on NAD(P)H; nucleoside phosphate binding; flavin adenine dinucleotide binding; ion binding; nucleotide binding; cofactor binding; oxidoreductase activity, acting on a sulfur group of donors, NAD(P) as acceptor; oxidoreductase activity; heterocyclic compound binding; organic cyclic compound binding; catalytic activity; binding; oxidoreductase activity, acting on a sulfur group of donors; anion binding; small molecule binding; coenzyme binding;                                                                                                                                                                                                                                                   | K00382                                                                                                                                  | DLD; dihydropyridyl dehydrogenase [EC:1.8.1.4]      | dre00010 Glycolysis / Gluconeogenesis - Danio rerio (zebrafish); dre01200 Carbon metabolism - Danio rerio (zebrafish); dre01100 Metabolic pathways - Danio rerio (zebrafish); dre00620 Pyruvate metabolism - Danio rerio (zebrafish); dre00260 Glycine, serine and threonine metabolism - Danio rerio (zebrafish); dre00020 Citrate cycle (TCA cycle) - Danio rerio (zebrafish); dre00280 Valine, leucine and isoleucine degradation - Danio rerio (zebrafish); | IPR016156; IPR004099; IPR023753;                       | FAD/NAD-linked reductase, dimerisation domain; Pyridine nucleotide-disulphide oxidoreductase, dimerisation domain; Pyridine nucleotide-disulphide oxidoreductase, FAD(NAD)(P)-binding domain; |

|        |                                 |                                                   |                          |      |               |                  |                                                                                                                                                                                                                                                                                                                                                                                                                                                                                                                                                                                                                                                                      |                                                                                                                                                                                                                                                                                                                                                                                                                                                                                                                                                        |                                                                                                                                                                                                                                                                                                                                                                                                                                                                                                                                                                                                                                                                                                                                                                                                                                                                                                                                                                                                                                                                                                                                                                                                                                                                                      |                                                                                                                                                                                                                                                                                                                                                                                                                                                                                                                                                                                                                                                                                                                                                                                                                                                                                                                                                                                                                                                                                                                                                                                                                                                                                                                                                                                                                                                                                                                                                                                                                                                                                                                                                                                                                                                                                                  |                                                                                                                                                                                                                                                                                                                                                                                                                                                                                                                                                                                                                                                                                                                                                                                                                                                                   |                                                                                                     |                                                               |                                                        |                                                                                                                                                                                                                  |                                                                                                                                                                    |
|--------|---------------------------------|---------------------------------------------------|--------------------------|------|---------------|------------------|----------------------------------------------------------------------------------------------------------------------------------------------------------------------------------------------------------------------------------------------------------------------------------------------------------------------------------------------------------------------------------------------------------------------------------------------------------------------------------------------------------------------------------------------------------------------------------------------------------------------------------------------------------------------|--------------------------------------------------------------------------------------------------------------------------------------------------------------------------------------------------------------------------------------------------------------------------------------------------------------------------------------------------------------------------------------------------------------------------------------------------------------------------------------------------------------------------------------------------------|--------------------------------------------------------------------------------------------------------------------------------------------------------------------------------------------------------------------------------------------------------------------------------------------------------------------------------------------------------------------------------------------------------------------------------------------------------------------------------------------------------------------------------------------------------------------------------------------------------------------------------------------------------------------------------------------------------------------------------------------------------------------------------------------------------------------------------------------------------------------------------------------------------------------------------------------------------------------------------------------------------------------------------------------------------------------------------------------------------------------------------------------------------------------------------------------------------------------------------------------------------------------------------------|--------------------------------------------------------------------------------------------------------------------------------------------------------------------------------------------------------------------------------------------------------------------------------------------------------------------------------------------------------------------------------------------------------------------------------------------------------------------------------------------------------------------------------------------------------------------------------------------------------------------------------------------------------------------------------------------------------------------------------------------------------------------------------------------------------------------------------------------------------------------------------------------------------------------------------------------------------------------------------------------------------------------------------------------------------------------------------------------------------------------------------------------------------------------------------------------------------------------------------------------------------------------------------------------------------------------------------------------------------------------------------------------------------------------------------------------------------------------------------------------------------------------------------------------------------------------------------------------------------------------------------------------------------------------------------------------------------------------------------------------------------------------------------------------------------------------------------------------------------------------------------------------------|-------------------------------------------------------------------------------------------------------------------------------------------------------------------------------------------------------------------------------------------------------------------------------------------------------------------------------------------------------------------------------------------------------------------------------------------------------------------------------------------------------------------------------------------------------------------------------------------------------------------------------------------------------------------------------------------------------------------------------------------------------------------------------------------------------------------------------------------------------------------|-----------------------------------------------------------------------------------------------------|---------------------------------------------------------------|--------------------------------------------------------|------------------------------------------------------------------------------------------------------------------------------------------------------------------------------------------------------------------|--------------------------------------------------------------------------------------------------------------------------------------------------------------------|
| E7F4R9 | Isocitrate dehydrogenase [NADP] | _TNLKD(cr)ALGK_                                   | 443                      | 1    | AKTNLKDKALGK_ | mitochondria     | tricarboxylic acid metabolic process; oxidation-reduction process; small molecule metabolic process; tricarboxylic acid cycle; single-organism cellular process; single-organism process; isocitrate metabolic process; primary metabolic process; cellular respiration; cellular metabolic process; organic substance metabolic process; citrate metabolic process; metabolic process; generation of precursor metabolites and energy; aerobic respiration; single-organism metabolic process; energy derivation by oxidation of organic compounds; carboxylic acid metabolic process; organic acid metabolic process; cellular process; oxoacid metabolic process; | magnesium ion binding; nucleoside phosphate binding; ion binding; isocitrate dehydrogenase activity; nucleoside binding; cofactor binding; oxidoreductase activity; oxidoreductase activity, acting on CH-OH group of donors; heterocyclic compound binding; organic cyclic compound binding; oxidoreductase activity, acting on the CH-OH group of donors, NAD or NADP as acceptor; catalytic activity; NAD binding; binding; isocitrate dehydrogenase (NADP+) activity; metal ion binding; cation binding; small molecule binding; coenzyme binding; | K00031                                                                                                                                                                                                                                                                                                                                                                                                                                                                                                                                                                                                                                                                                                                                                                                                                                                                                                                                                                                                                                                                                                                                                                                                                                                                               | dre01210 2-Oxocarboxylic acid metabolism - Danio rerio (zebrafish); dre01230 Biosynthesis of amino acids - Danio rerio (zebrafish); dre01200 Carbon metabolism - Danio rerio (zebrafish); dre01100 Metabolic pathways - Danio rerio (zebrafish); dre00480 Glutathione metabolism - Danio rerio (zebrafish); dre04146 Peroxisome - Danio rerio (zebrafish); dre00020 Citrate cycle (TCA cycle) - Danio rerio (zebrafish);                                                                                                                                                                                                                                                                                                                                                                                                                                                                                                                                                                                                                                                                                                                                                                                                                                                                                                                                                                                                                                                                                                                                                                                                                                                                                                                                                                                                                                                                         | IPR024084;                                                                                                                                                                                                                                                                                                                                                                                                                                                                                                                                                                                                                                                                                                                                                                                                                                                        | Isopropylmalate dehydrogenase-like domain;                                                          |                                                               |                                                        |                                                                                                                                                                                                                  |                                                                                                                                                                    |
| E9QGC9 | myoz1b                          | Uncharacterized protein                           | _TPK(cr)DVMLEELSLMK_     | 51   | 1             | GTKTKPKDVMLEEL_  | .....K.V.....                                                                                                                                                                                                                                                                                                                                                                                                                                                                                                                                                                                                                                                        | nuclear                                                                                                                                                                                                                                                                                                                                                                                                                                                                                                                                                | regulation of biological quality; nucleoside metabolic process; purine nucleoside metabolic process; cellular divalent inorganic cation homeostasis; purine ribonucleoside monophosphate metabolic process; nucleoside metabolic process; positive regulation of muscle contraction; negative regulation of multicellular organismal process; single-organism process; purine ribonucleoside biosynthetic process; nucleoside biosynthetic process; biosynthetic process; ribonucleoside monophosphate biosynthetic process; cellular metabolic process; phosphate-containing compound metabolic process; response to external stimulus; ribose phosphate biosynthetic process; metabolic process; carbohydrate derivative biosynthetic process; positive regulation of multicellular organismal process; nucleoside phosphate metabolic process; regulation of skeletal muscle contraction; metal ion homeostasis; regulation of system process; ribose phosphate metabolic process; purine nucleoside triphosphate biosynthetic process; heterocyclic biosynthetic process; purine ribonucleoside triphosphate biosynthetic process; ion homeostasis; calcium ion homeostasis; small molecule metabolic process; negative regulation of striated muscle contraction; inorganic ion | ATPase activity, coupled to transmembrane movement of ions; nucleoside phosphate binding; primary active transmembrane transporter activity; substrate-specific transporter activity; hydrolase activity, acting on acid anhydrides; hydrolase activity; substrate-specific transmembrane transporter activity; ATPase activity; organic cyclic compound binding; heterocyclic compound binding; metal ion transmembrane transporter activity; pyrophosphatase activity; cation-transporting ATPase activity; catalytic activity; ribonucleoside binding; ATPase activity, coupled to movement of substances; binding; purine ribonucleoside binding; cation binding; hydrolase activity, acting on acid anhydrides, catalyzing transmembrane movement of substances; anion binding; adenylyl ribonucleoside binding; adenylyl nucleoside binding; inorganic cation transmembrane transporter activity; hydrolase activity, acting on acid anhydrides, in phosphorus-containing anhydrides; transporter activity; purine nucleoside binding; purine ribonucleoside triphosphate binding; active transmembrane transporter activity; ATP binding; ion transmembrane transporter activity; ion binding; nucleoside binding; nucleoside binding; nucleoside-triphosphatase activity; ribonucleoside binding; P-P-bond-hydrolysis-driven transmembrane transporter activity; ATPase activity, coupled to transmembrane movement of ions, phosphorylative mechanism; divalent inorganic cation transmembrane transporter activity; carbohydrate derivative binding; calcium-transporting ATPase activity; ATPase activity, coupled to transmembrane movement of substances; ATPase activity; metal ion binding; purine ribonucleoside binding; purine nucleoside binding; calcium ion binding; cation transmembrane transporter activity; transmembrane transporter activity; small molecule binding; |                                                                                                                                                                                                                                                                                                                                                                                                                                                                                                                                                                                                                                                                                                                                                                                                                                                                   |                                                                                                     |                                                               |                                                        |                                                                                                                                                                                                                  |                                                                                                                                                                    |
| Q5U3A4 | atp2a1                          | Calcium-transporting ATPase                       | _TLPQQK(cr)LDFEGQLSK_    | 252  | 1             | EKTFPQQKLEDFEGEQ |                                                                                                                                                                                                                                                                                                                                                                                                                                                                                                                                                                                                                                                                      | plasma membrane                                                                                                                                                                                                                                                                                                                                                                                                                                                                                                                                        | membrane; endoplasmic reticulum; nuclear outer membrane-endoplasmic reticulum membrane network; organelle membrane; myofibril; cytoplasm; intrinsic component of membrane; intracellular part; sarcoplasm; cell; I band; organelle part; non-membrane-bounded organelle; intracellular; cell part; membrane part; contractile fiber; membrane region; perinuclear region of cytoplasm; membrane-bounded organelle; endoplasmic reticulum membrane; intracellular organelle; bounding membrane of organelle; intracellular non-membrane-bounded organelle; H zone; intracellular organelle part; sarcoplasmic reticulum; endomembrane system; integral component of membrane; organelle; intracellular membrane-bounded organelle; endoplasmic reticulum part; endoplasmic reticulum-Golgi intermediate compartment; A band; sarcomere; contractile fiber part; cytoplasmic part;                                                                                                                                                                                                                                                                                                                                                                                                     | ATPase activity, coupled to transmembrane movement of ions; nucleoside phosphate binding; primary active transmembrane transporter activity; substrate-specific transporter activity; hydrolase activity, acting on acid anhydrides, catalyzing transmembrane movement of substances; anion binding; adenylyl ribonucleoside binding; adenylyl nucleoside binding; inorganic cation transmembrane transporter activity; hydrolase activity, acting on acid anhydrides, in phosphorus-containing anhydrides; transporter activity; purine nucleoside binding; purine ribonucleoside triphosphate binding; active transmembrane transporter activity; ATP binding; ion transmembrane transporter activity; ion binding; nucleoside binding; nucleoside binding; nucleoside-triphosphatase activity; ribonucleoside binding; P-P-bond-hydrolysis-driven transmembrane transporter activity; ATPase activity, coupled to transmembrane movement of ions, phosphorylative mechanism; divalent inorganic cation transmembrane transporter activity; carbohydrate derivative binding; calcium-transporting ATPase activity; ATPase activity, coupled to transmembrane movement of substances; ATPase activity; metal ion binding; purine ribonucleoside binding; purine nucleoside binding; calcium ion binding; cation transmembrane transporter activity; transmembrane transporter activity; small molecule binding;                                                                                                                                                                                                                                                                                                                                                                                                                                                                                 | K05853                                                                                                                                                                                                                                                                                                                                                                                                                                                                                                                                                                                                                                                                                                                                                                                                                                                            | ATP2A; Ca2+ transportin g ATPase, sarcoplasmic/endoplasmic reticulum [EC:3.6.3.8]                   | dre04020 Calcium signaling pathway - Danio rerio (zebrafish); | IPR004014; IPR008250; IPR023299; IPR006068; IPR023214; | Cation-transporting P-type ATPase, N-terminal; P-type ATPase transmembrane domain; P-type ATPase, A domain; P-type ATPase, cytoplasmic domain N; Cation-transporting P-type ATPase, C-terminal; HAD-like domain; |                                                                                                                                                                    |
| I3ISK4 | gnb3b                           | Uncharacterized protein                           | _TPVVK(cr)TVK_           | 132  | 1             | NLKTVPVKTKELDA_  | .....K.V.....                                                                                                                                                                                                                                                                                                                                                                                                                                                                                                                                                                                                                                                        | cytosol                                                                                                                                                                                                                                                                                                                                                                                                                                                                                                                                                |                                                                                                                                                                                                                                                                                                                                                                                                                                                                                                                                                                                                                                                                                                                                                                                                                                                                                                                                                                                                                                                                                                                                                                                                                                                                                      |                                                                                                                                                                                                                                                                                                                                                                                                                                                                                                                                                                                                                                                                                                                                                                                                                                                                                                                                                                                                                                                                                                                                                                                                                                                                                                                                                                                                                                                                                                                                                                                                                                                                                                                                                                                                                                                                                                  |                                                                                                                                                                                                                                                                                                                                                                                                                                                                                                                                                                                                                                                                                                                                                                                                                                                                   | WD40 repeat-containing domain; WD40/YVTN repeat-like-containing domain; G-protein, beta subunit;    |                                                               |                                                        |                                                                                                                                                                                                                  |                                                                                                                                                                    |
| Q6XG62 | icn                             | Protein S100                                      | _TTDK(cr)AALDK_          | 53   | 1             | IFGKTTDKAALDKIF_ | .....DK.....                                                                                                                                                                                                                                                                                                                                                                                                                                                                                                                                                                                                                                                         | cytosol                                                                                                                                                                                                                                                                                                                                                                                                                                                                                                                                                |                                                                                                                                                                                                                                                                                                                                                                                                                                                                                                                                                                                                                                                                                                                                                                                                                                                                                                                                                                                                                                                                                                                                                                                                                                                                                      |                                                                                                                                                                                                                                                                                                                                                                                                                                                                                                                                                                                                                                                                                                                                                                                                                                                                                                                                                                                                                                                                                                                                                                                                                                                                                                                                                                                                                                                                                                                                                                                                                                                                                                                                                                                                                                                                                                  |                                                                                                                                                                                                                                                                                                                                                                                                                                                                                                                                                                                                                                                                                                                                                                                                                                                                   | EF-hand domain; EF-hand domain pair; EF-hand domain; S100/CaBP-9k-type, calcium binding, subdomain; |                                                               |                                                        |                                                                                                                                                                                                                  |                                                                                                                                                                    |
| F1R8T2 |                                 | Protein S100 (Fragment)                           | _TTDK(cr)ASLDNIFK_       | 53   | 1             | VFGKTTDKASLDNIF_ | .....DK.....                                                                                                                                                                                                                                                                                                                                                                                                                                                                                                                                                                                                                                                         | cytosol                                                                                                                                                                                                                                                                                                                                                                                                                                                                                                                                                |                                                                                                                                                                                                                                                                                                                                                                                                                                                                                                                                                                                                                                                                                                                                                                                                                                                                                                                                                                                                                                                                                                                                                                                                                                                                                      |                                                                                                                                                                                                                                                                                                                                                                                                                                                                                                                                                                                                                                                                                                                                                                                                                                                                                                                                                                                                                                                                                                                                                                                                                                                                                                                                                                                                                                                                                                                                                                                                                                                                                                                                                                                                                                                                                                  |                                                                                                                                                                                                                                                                                                                                                                                                                                                                                                                                                                                                                                                                                                                                                                                                                                                                   | EF-hand domain; EF-hand domain pair; S100/CaBP-9k-type, calcium binding, subdomain;                 |                                                               |                                                        |                                                                                                                                                                                                                  |                                                                                                                                                                    |
| Q98U7  | myt3                            | Fast skeletal muscle myosin light polypeptide 3   | _TVDANQK(cr)GTYYDYVEGLR_ | 83   | 1             | KTVNANQKGTYYDYV_ |                                                                                                                                                                                                                                                                                                                                                                                                                                                                                                                                                                                                                                                                      | cytosol                                                                                                                                                                                                                                                                                                                                                                                                                                                                                                                                                |                                                                                                                                                                                                                                                                                                                                                                                                                                                                                                                                                                                                                                                                                                                                                                                                                                                                                                                                                                                                                                                                                                                                                                                                                                                                                      |                                                                                                                                                                                                                                                                                                                                                                                                                                                                                                                                                                                                                                                                                                                                                                                                                                                                                                                                                                                                                                                                                                                                                                                                                                                                                                                                                                                                                                                                                                                                                                                                                                                                                                                                                                                                                                                                                                  |                                                                                                                                                                                                                                                                                                                                                                                                                                                                                                                                                                                                                                                                                                                                                                                                                                                                   | EF-hand domain pair; EF-hand domain;                                                                |                                                               |                                                        |                                                                                                                                                                                                                  |                                                                                                                                                                    |
| Q6IQX1 | myh2                            | Myosin, heavy polypeptide 2, fast muscle specific | _TVEDQLSEK(cr)ISK_       | 1262 | 1             | EDQLSEIKSKNDENL_ |                                                                                                                                                                                                                                                                                                                                                                                                                                                                                                                                                                                                                                                                      | cytosol                                                                                                                                                                                                                                                                                                                                                                                                                                                                                                                                                | response to stress; response to stimulus;                                                                                                                                                                                                                                                                                                                                                                                                                                                                                                                                                                                                                                                                                                                                                                                                                                                                                                                                                                                                                                                                                                                                                                                                                                            | intracellular organelle; intracellular non-membrane-bounded organelle; cytoskeletal part; intracellular organelle part; macromolecular complex; intracellular part; cell; actin cytoskeleton; organelle part; non-membrane-bounded organelle; organelle; cytoskeleton; cell part; intracellular; myosin complex; protein complex;                                                                                                                                                                                                                                                                                                                                                                                                                                                                                                                                                                                                                                                                                                                                                                                                                                                                                                                                                                                                                                                                                                                                                                                                                                                                                                                                                                                                                                                                                                                                                                | ATP binding; motor activity; nucleoside phosphate binding; nucleoside binding; ion binding; hydrolase activity, acting on acid anhydrides; hydrolase activity, acting on acid anhydrides; hydrolase activity, acting on acid anhydrides; nucleoside binding; nucleoside-triphosphatase activity; organic cyclic compound binding; heterocyclic compound binding; ribonucleoside binding; carbohydrate derivative binding; pyrophosphatase activity; catalytic activity; ribonucleoside binding; binding; purine ribonucleoside binding; anion binding; purine ribonucleoside binding; adenylyl ribonucleoside binding; adenylyl nucleoside binding; purine nucleoside binding; hydrolase activity, acting on acid anhydrides, in phosphorus-containing anhydrides; purine nucleoside binding; small molecule binding; purine ribonucleoside triphosphate binding; | K10352                                                                                              | MYH; myosin heavy chain                                       | dre04530 Tight junction - Danio rerio (zebrafish);     | IPR002928; IPR004009; IPR001609; IPR027417; IPR027401;                                                                                                                                                           | Myosin tail; Myosin, N-terminal, SH3-like; Myosin head, motor domain, P-loop containing nucleoside triphosphate hydrolase; Myosin-like IQ motif-containing domain; |
| F1R8W4 | desma                           | Uncharacterized protein                           | _TVLTK(cr)TIETR_         | 452  | 1             | SKKTVLTKTIETRDG_ | .....K.L.....                                                                                                                                                                                                                                                                                                                                                                                                                                                                                                                                                                                                                                                        | mitochondria                                                                                                                                                                                                                                                                                                                                                                                                                                                                                                                                           |                                                                                                                                                                                                                                                                                                                                                                                                                                                                                                                                                                                                                                                                                                                                                                                                                                                                                                                                                                                                                                                                                                                                                                                                                                                                                      | intracellular organelle; intracellular non-membrane-bounded organelle; cytoskeletal part; intracellular organelle part; macromolecular complex; intracellular part; cell; organelle part; non-membrane-bounded organelle; organelle; cytoskeleton; intermediate filament cytoskeleton; cell part; intracellular; intermediate filament; protein complex;                                                                                                                                                                                                                                                                                                                                                                                                                                                                                                                                                                                                                                                                                                                                                                                                                                                                                                                                                                                                                                                                                                                                                                                                                                                                                                                                                                                                                                                                                                                                         | structural molecule activity;                                                                                                                                                                                                                                                                                                                                                                                                                                                                                                                                                                                                                                                                                                                                                                                                                                     | K07610                                                                                              |                                                               | IPR006821;                                             | Intermediate filament head, DNA-binding domain;                                                                                                                                                                  |                                                                                                                                                                    |
| F6NT71 | hbbe1.1                         | Uncharacterized protein                           | _TVLTK(cr)GLELAVK_       | 11   | 1             | AHGKTVLKGLELAVK_ | .....K.L.....                                                                                                                                                                                                                                                                                                                                                                                                                                                                                                                                                                                                                                                        | cytosol                                                                                                                                                                                                                                                                                                                                                                                                                                                                                                                                                |                                                                                                                                                                                                                                                                                                                                                                                                                                                                                                                                                                                                                                                                                                                                                                                                                                                                                                                                                                                                                                                                                                                                                                                                                                                                                      |                                                                                                                                                                                                                                                                                                                                                                                                                                                                                                                                                                                                                                                                                                                                                                                                                                                                                                                                                                                                                                                                                                                                                                                                                                                                                                                                                                                                                                                                                                                                                                                                                                                                                                                                                                                                                                                                                                  |                                                                                                                                                                                                                                                                                                                                                                                                                                                                                                                                                                                                                                                                                                                                                                                                                                                                   |                                                                                                     | IPR009050; IPR000971; IPR012292;                              | Globin-like; Globin; Globin, structural domain;        |                                                                                                                                                                                                                  |                                                                                                                                                                    |
| Q93548 | be1                             | Embryonic 1 beta-globin                           | _TVLTK(cr)GLELAVK_       | 70   | 1             | AHGKTVLKGLELAVK_ | .....K.L.....                                                                                                                                                                                                                                                                                                                                                                                                                                                                                                                                                                                                                                                        | cytosol                                                                                                                                                                                                                                                                                                                                                                                                                                                                                                                                                |                                                                                                                                                                                                                                                                                                                                                                                                                                                                                                                                                                                                                                                                                                                                                                                                                                                                                                                                                                                                                                                                                                                                                                                                                                                                                      | cell part; intracellular; hemoglobin complex; cytoplasm; macromolecular complex; intracellular part; cytosolic part; protein complex; cell; cytosol; cytoplasmic part;                                                                                                                                                                                                                                                                                                                                                                                                                                                                                                                                                                                                                                                                                                                                                                                                                                                                                                                                                                                                                                                                                                                                                                                                                                                                                                                                                                                                                                                                                                                                                                                                                                                                                                                           | organic cyclic compound binding; heterocyclic compound binding; heme binding; iron ion binding; transition metal ion binding; oxygen binding; binding; ion binding; substrate-specific transporter activity; metal ion binding; cation binding; oxygen transporter activity; tetrapyrrole binding; transporter activity;                                                                                                                                                                                                                                                                                                                                                                                                                                                                                                                                          |                                                                                                     |                                                               | IPR009050; IPR000971; IPR012292;                       | Globin-like; Globin; Globin, structural domain;                                                                                                                                                                  |                                                                                                                                                                    |

|        |         |                                                                                          |                          |       |   |                 |               |               |                                                                                                                                                                                                                                                                                                                                                                                                                                                                                        |        |                                               |                                                                                                                                                                                                |                                                                                                                                                                                                        |
|--------|---------|------------------------------------------------------------------------------------------|--------------------------|-------|---|-----------------|---------------|---------------|----------------------------------------------------------------------------------------------------------------------------------------------------------------------------------------------------------------------------------------------------------------------------------------------------------------------------------------------------------------------------------------------------------------------------------------------------------------------------------------|--------|-----------------------------------------------|------------------------------------------------------------------------------------------------------------------------------------------------------------------------------------------------|--------------------------------------------------------------------------------------------------------------------------------------------------------------------------------------------------------|
| P13104 | tpma    | Tropomyosin alpha-1 chain                                                                | _TVTNNMK(cr)SLEAQAEK_    | 205   | 1 | KVTVNNMKSLEAQAE | .....K.L..... | cytosol       | cytoskeleton; organelle; intracellular organelle; intracellular non-membrane-bounded organelle; cell part; intracellular; cytoplasm; intracellular part; cell; non-membrane-bounded organelle;                                                                                                                                                                                                                                                                                         | K10373 | TPM1; tropomyosin 1                           | dre04260 Carabid muscle contraction - Danio rerio (zebrafish); dre04261 Adrenergic signaling in cardiomyocytes - Danio rerio (zebrafish);                                                      |                                                                                                                                                                                                        |
| Q7ZV82 | rp127   | 60S ribosomal protein L27                                                                | _TVNWK(cr)DVFR_          | 98    | 1 | LDKTVNWKDVFRDPA | .....K.V..... | cytosol       | cellular protein metabolic process; biosynthetic process; primary metabolic process; cellular metabolic process; organic substance biosynthetic process; cellular biosynthetic process; organic substance metabolic process; metabolic process; cellular macromolecule biosynthetic process; cellular macromolecule metabolic process; gene expression; macromolecule metabolic process; protein metabolic process; macromolecule biosynthetic process; translation; cellular process; | K02901 | RP-L27e; large subunit ribosomal protein L27e | dre03010 Ribosome - Danio rerio (zebrafish);                                                                                                                                                   | Translation protein SH3-like domain; Ribosomal protein L2 domain 2; KOW;                                                                                                                               |
| B8A561 | myhz1.2 | Uncharacterized protein                                                                  | _VAK(cr)EDDVHPM(cr)NPPK_ | 74    | 1 | TKEERVAKEDDVHPM | ..E....K..... | nuclear       | intracellular organelle; intracellular non-membrane-bounded organelle; cytoskeleton part; intracellular organelle part; macromolecular complex; intracellular part; cell; actin cytoskeleton; organelle part; non-membrane-bounded organelle; organelle; cytoskeleton; cell part; intracellular; myosin complex; protein complex;                                                                                                                                                      | K10352 | MYH; myosin heavy chain                       | dre04530 Tight junction - Danio rerio (zebrafish);                                                                                                                                             | Myosin tail; Myosin N-terminal; SH3-like; Myosin head, motor domain; P-loop containing nucleoside triphosphate hydrolase; Myosin-like IQ motif-containing domain;                                      |
| B8A561 | myhz1.2 | Uncharacterized protein                                                                  | _VAK(cr)EDDVHPMNPVK_     | 74    | 1 | TKEERVAKEDDVHPM | ..E....K..... | nuclear       | intracellular organelle; intracellular non-membrane-bounded organelle; cytoskeleton part; intracellular organelle part; macromolecular complex; intracellular part; cell; actin cytoskeleton; organelle part; non-membrane-bounded organelle; organelle; cytoskeleton; cell part; intracellular; myosin complex; protein complex;                                                                                                                                                      | K10352 | MYH; myosin heavy chain                       | dre04530 Tight junction - Danio rerio (zebrafish);                                                                                                                                             | Myosin tail; Myosin N-terminal; SH3-like; Myosin head, motor domain; P-loop containing nucleoside triphosphate hydrolase; Myosin-like IQ motif-containing domain;                                      |
| F1Q6U4 | hbae3   | Uncharacterized protein                                                                  | _VAPK(cr)AEEIGR_         | 21    | 1 | FFDKVAPKAEKGRE  | .....K.E..... | cytosol       | cell part; intracellular; hemoglobin complex; cytoplasm; macromolecular complex; intracellular part; cytosolic part; protein complex; cell; cytosol; cytoplasmic part;                                                                                                                                                                                                                                                                                                                 | K10352 | MYH; myosin heavy chain                       | dre04530 Tight junction - Danio rerio (zebrafish);                                                                                                                                             | Globin-like; Globin; Globin; structural domain;                                                                                                                                                        |
| Q7SXN2 | hnripd1 | Heterogeneous nuclear ribonucleoprotein D-like                                           | _VAQPK(cr)EVYR_          | 193   | 1 | EIKVAQPKEVYRQQQ | .....K.V..... | nuclear       | macromolecular complex; intracellular part; intracellular;                                                                                                                                                                                                                                                                                                                                                                                                                             | K13044 |                                               | organic cyclic compound binding; heterocyclic compound binding; nucleoside phosphate binding; heterocyclic compound binding; nucleic acid binding; nucleotide binding; small molecule binding; | RNA recognition motif domain; Nucleoside-binding, alpha-beta fold;                                                                                                                                     |
| Q98U9  | hnn3a   | Fast skeletal muscle troponin T                                                          | VDFDDIDK(cr)K            | 38    | 1 | VDFDDIDKRRHNKDT |               | nuclear       |                                                                                                                                                                                                                                                                                                                                                                                                                                                                                        | K12046 |                                               |                                                                                                                                                                                                | Matrilin, coiled-coil trimerisation domain; Epidermal growth factor-like domain; von Willebrand factor, type A;                                                                                        |
| E7EXP0 | hnn3b   | Uncharacterized protein                                                                  | VEELSK(cr)YSK_           | 220   | 1 | KRVEELSKYSKKGAA |               | nuclear       |                                                                                                                                                                                                                                                                                                                                                                                                                                                                                        | K12046 |                                               |                                                                                                                                                                                                | Matrilin, coiled-coil trimerisation domain; Epidermal growth factor-like domain; von Willebrand factor, type A;                                                                                        |
| ASWWJ4 | man1    | Uncharacterized protein                                                                  | _VFLAK(cr)VIDGLSVGDATR_  | 63    | 1 | QVKVFLAKVIDGLSV | .....K.L..... | extracellular |                                                                                                                                                                                                                                                                                                                                                                                                                                                                                        | K12046 |                                               |                                                                                                                                                                                                | Matrilin, coiled-coil trimerisation domain; Epidermal growth factor-like domain; von Willebrand factor, type A;                                                                                        |
| Q803M8 | ywhaqb  | Tyrosine 3-monooxygenase/tryptophan 5-monooxygenase activation protein, zeta polypeptide | _VFYLK(cr)MK_            | 120   | 1 | ESKVYFLKMKGDYYR |               | cytosol       |                                                                                                                                                                                                                                                                                                                                                                                                                                                                                        | K16197 | YWHA2, Q, Z, 14-3-3 protein beta/theta/zeta   | dre04110 Cell cycle - Danio rerio (zebrafish); dre04114 Oocyte meiosis - Danio rerio (zebrafish);                                                                                              | 14-3-3 domain;                                                                                                                                                                                         |
| E9QJ96 | ywhaba  | 14-3-3 protein beta/alpha-A                                                              | VFYLK(cr)MK              | 120   | 1 | ESKVYFLKMKGDYYR |               | cytosol       |                                                                                                                                                                                                                                                                                                                                                                                                                                                                                        | K16197 | YWHA2, Q, Z, 14-3-3 protein beta/theta/zeta   | dre04110 Cell cycle - Danio rerio (zebrafish); dre04114 Oocyte meiosis - Danio rerio (zebrafish);                                                                                              | 14-3-3 domain;                                                                                                                                                                                         |
| Q98V0  | pvalb2  | Parvalbumin-2                                                                            | _VGLSAK(cr)SPDDIK_       | 39    | 1 | AKVGLSAKSPDDIK  |               | cytosol       |                                                                                                                                                                                                                                                                                                                                                                                                                                                                                        | K16197 | YWHA2, Q, Z, 14-3-3 protein beta/theta/zeta   | dre04110 Cell cycle - Danio rerio (zebrafish); dre04114 Oocyte meiosis - Danio rerio (zebrafish);                                                                                              | 14-3-3 domain; EF-hand domain; EF-hand domain pair;                                                                                                                                                    |
| G1K2X0 | tnb     | Uncharacterized protein (Fragment)                                                       | _VHEK(cr)NLR_            | 25335 | 1 | EWTKVHEKRLRVTEH | .....K.L..... |               |                                                                                                                                                                                                                                                                                                                                                                                                                                                                                        | K12567 |                                               |                                                                                                                                                                                                | Immunoglobulin subtype 2; Immunoglobulin-like domain; Protein kinase domain; Immunoglobulin-like fold; Immunoglobulin domain; Fibronectin, type III; Immunoglobulin I-set; Protein kinase-like domain; |
| G1K2X0 | tnb     | Uncharacterized protein (Fragment)                                                       | _VHHYVVEK(cr)R_          | 24446 | 1 | VHHYVVEKREASRRT | .....K.E..... |               |                                                                                                                                                                                                                                                                                                                                                                                                                                                                                        | K12567 |                                               |                                                                                                                                                                                                | Immunoglobulin subtype 2; Immunoglobulin-like domain; Protein kinase domain; Immunoglobulin-like fold; Immunoglobulin domain; Fibronectin, type III; Immunoglobulin I-set; Protein kinase-like domain; |
| F1RB19 | ybx1    | Uncharacterized protein                                                                  | VIATK(cr)VLGTVK          | 38    | 1 | DKKVIATKVLGTVKW | .....K.L..... | nuclear       |                                                                                                                                                                                                                                                                                                                                                                                                                                                                                        | K12567 |                                               |                                                                                                                                                                                                | Immunoglobulin subtype 2; Immunoglobulin-like domain; Protein kinase domain; Immunoglobulin-like fold; Immunoglobulin domain; Fibronectin, type III; Immunoglobulin I-set; Protein kinase-like domain; |

|        |        |                                    |                           |       |   |                 |               |         |                                                                                                                                                                                                                                                                                                                                                                                                                                                                                                   |                                                                                                                                                                                                                                                                                                                                                                                                                                                                                                                                                                                                                                                                                                                                                                                         |                                                                                                                                                                                                                                                                                                                                                                                                                                                                                                                                                                                                                                                                                                                                                                                         |                         |                                                    |                                                                                         |                                                                                                                                                                                                         |                                                                                                                                                                    |
|--------|--------|------------------------------------|---------------------------|-------|---|-----------------|---------------|---------|---------------------------------------------------------------------------------------------------------------------------------------------------------------------------------------------------------------------------------------------------------------------------------------------------------------------------------------------------------------------------------------------------------------------------------------------------------------------------------------------------|-----------------------------------------------------------------------------------------------------------------------------------------------------------------------------------------------------------------------------------------------------------------------------------------------------------------------------------------------------------------------------------------------------------------------------------------------------------------------------------------------------------------------------------------------------------------------------------------------------------------------------------------------------------------------------------------------------------------------------------------------------------------------------------------|-----------------------------------------------------------------------------------------------------------------------------------------------------------------------------------------------------------------------------------------------------------------------------------------------------------------------------------------------------------------------------------------------------------------------------------------------------------------------------------------------------------------------------------------------------------------------------------------------------------------------------------------------------------------------------------------------------------------------------------------------------------------------------------------|-------------------------|----------------------------------------------------|-----------------------------------------------------------------------------------------|---------------------------------------------------------------------------------------------------------------------------------------------------------------------------------------------------------|--------------------------------------------------------------------------------------------------------------------------------------------------------------------|
| B0R198 | vdac3  | Uncharacterized protein            | _VK(cr)ELGLSLNOK_         | 90    | 1 | LETKYKVKELGLSLN | .....K.L..... | cytosol | membrane; intracellular organelle; outer membrane; mitochondrial part; bounding membrane of organelle; organelle membrane; mitochondrial outer membrane; cytoplasm; intracellular organelle part; organelle envelope; intracellular part; cell; organelle part; mitochondrion; organelle; mitochondrial envelope; intracellular membrane-bounded organelle; intracellular; cell part; envelope; organelle outer membrane; membrane-bounded organelle; mitochondrial membrane; <i>cytochrome c</i> | ion transmembrane transporter activity; passive transmembrane transporter activity; anion channel activity; substrate-specific transporter activity; channel activity; substrate-specific transmembrane transporter activity; voltage-gated ion channel activity; voltage-gated anion channel activity; substrate-specific channel activity; ion channel activity; gated channel activity; voltage-gated channel activity; transmembrane transporter activity; transporter activity; anion transmembrane transporter activity;                                                                                                                                                                                                                                                          |                                                                                                                                                                                                                                                                                                                                                                                                                                                                                                                                                                                                                                                                                                                                                                                         |                         |                                                    | IPR023614; Perin domain;                                                                |                                                                                                                                                                                                         |                                                                                                                                                                    |
| B8A568 | myh2.1 | Uncharacterized protein            | _VK(cr)ELTYQTEEDKK_       | 1850  | 1 | RKYERRVKELTYQTE | .....K.L..... | nuclear | intracellular organelle; intracellular non-membrane-bounded organelle; cytoskeleton part; intracellular organelle part; macromolecular complex; intracellular part; cell; actin cytoskeleton; organelle part; non-membrane-bounded organelle; organelle; cytoskeleton; cell part; intracellular; myosin complex; protein complex;                                                                                                                                                                 | ATP binding; motor activity; nucleoside phosphate binding; nucleoside binding; ion binding; hydrolase activity, acting on acid anhydrides; hydrolase activity; nucleotide binding; nucleoside-triphosphatase activity; organic cyclic compound binding; heterocyclic compound binding; ribonucleoside binding; carbohydrate derivative binding; pyrophosphatase activity; catalytic activity; ribonucleotide binding; binding; purine ribonucleoside binding; anion binding; purine ribonucleotide binding; adenylyl ribonucleotide binding; adenylyl nucleotide binding; purine nucleoside binding; hydrolase activity, acting on acid anhydrides, in phosphorus-containing anhydrides; purine nucleotide binding; small molecule binding; purine ribonucleoside triphosphate binding; | K10352                                                                                                                                                                                                                                                                                                                                                                                                                                                                                                                                                                                                                                                                                                                                                                                  | MYH; myosin heavy chain | dre04530 Tight junction - Danio rerio (zebrafish); | IPR002928; IPR004009; IPR001609; IPR027417; IPR027401;                                  | Myosin tail; Myosin, N-terminal, SH3-like; Myosin head, motor domain; P-loop containing nucleoside triphosphate hydrolase; Myosin-like IQ motif-containing domain;                                      |                                                                                                                                                                    |
| B8A561 | myh2.2 | Uncharacterized protein            | _VK(cr)ELTYQTEEDKK_       | 1850  | 1 | RKYERRVKELTYQTE | .....K.L..... | nuclear | intracellular organelle; intracellular non-membrane-bounded organelle; cytoskeleton part; intracellular organelle part; macromolecular complex; intracellular part; cell; actin cytoskeleton; organelle part; non-membrane-bounded organelle; organelle; cytoskeleton; cell part; intracellular; myosin complex; protein complex;                                                                                                                                                                 | ATP binding; motor activity; nucleoside phosphate binding; nucleoside binding; ion binding; hydrolase activity, acting on acid anhydrides; hydrolase activity; nucleotide binding; nucleoside-triphosphatase activity; organic cyclic compound binding; heterocyclic compound binding; ribonucleoside binding; carbohydrate derivative binding; pyrophosphatase activity; catalytic activity; ribonucleotide binding; binding; purine ribonucleoside binding; anion binding; purine ribonucleotide binding; adenylyl ribonucleotide binding; adenylyl nucleotide binding; purine nucleoside binding; hydrolase activity, acting on acid anhydrides, in phosphorus-containing anhydrides; purine nucleotide binding; small molecule binding; purine ribonucleoside triphosphate binding; | K10352                                                                                                                                                                                                                                                                                                                                                                                                                                                                                                                                                                                                                                                                                                                                                                                  | MYH; myosin heavy chain | dre04530 Tight junction - Danio rerio (zebrafish); | IPR002928; IPR004009; IPR001609; IPR027417; IPR027401;                                  | Myosin tail; Myosin, N-terminal, SH3-like; Myosin head, motor domain; P-loop containing nucleoside triphosphate hydrolase; Myosin-like IQ motif-containing domain;                                      |                                                                                                                                                                    |
| G1K2X0 | trnb   | Uncharacterized protein (Fragment) | _VK(cr)IDVSK_             | 11960 | 1 | PDPTRYKIDVSKG   | .....K.L..... |         |                                                                                                                                                                                                                                                                                                                                                                                                                                                                                                   | ATP binding; nucleoside phosphate binding; phosphotransferase activity, alcohol group as acceptor; nucleoside binding; ion binding; protein tyrosine kinase activity; protein kinase activity; nucleotide binding; organic cyclic compound binding; heterocyclic compound binding; ribonucleoside binding; carbohydrate derivative binding; kinase activity; catalytic activity; ribonucleotide binding; binding; nucleic acid binding; purine ribonucleoside binding; anion binding; purine ribonucleotide binding; adenylyl ribonucleotide binding; adenylyl nucleotide binding; purine nucleoside binding; transferase activity, transferring phosphorus-containing groups; purine nucleotide binding; small molecule binding; purine ribonucleoside triphosphate binding;           | K12567                                                                                                                                                                                                                                                                                                                                                                                                                                                                                                                                                                                                                                                                                                                                                                                  |                         |                                                    | IPR003598; IPR007110; IPR000719; IPR013783; IPR003599; IPR003961; IPR013098; IPR011009; | Immunoglobulin subtype 2; Immunoglobulin-like domain; Protein kinase domain; Immunoglobulin-like fold; Immunoglobulin subtype; Fibronectin, type III; Immunoglobulin I-set; Protein kinase-like domain; |                                                                                                                                                                    |
| Q6IQX1 | myh2   | Uncharacterized protein            | _VK(cr)NLTEEM(α)ASQDSIAK_ | 978   | 1 | HATENKVKNLTEEMA | .....K.L..... | cytosol | response to stress; response to stimulus;                                                                                                                                                                                                                                                                                                                                                                                                                                                         | intracellular organelle; intracellular non-membrane-bounded organelle; cytoskeleton part; intracellular organelle part; macromolecular complex; intracellular part; cell; actin cytoskeleton; organelle part; non-membrane-bounded organelle; organelle; cytoskeleton; cell part; intracellular; myosin complex; protein complex;                                                                                                                                                                                                                                                                                                                                                                                                                                                       | ATP binding; motor activity; nucleoside phosphate binding; nucleoside binding; ion binding; hydrolase activity, acting on acid anhydrides; hydrolase activity; nucleotide binding; nucleoside-triphosphatase activity; organic cyclic compound binding; heterocyclic compound binding; ribonucleoside binding; carbohydrate derivative binding; pyrophosphatase activity; catalytic activity; ribonucleotide binding; binding; purine ribonucleoside binding; anion binding; purine ribonucleotide binding; adenylyl ribonucleotide binding; adenylyl nucleotide binding; purine nucleoside binding; hydrolase activity, acting on acid anhydrides, in phosphorus-containing anhydrides; purine nucleotide binding; small molecule binding; purine ribonucleoside triphosphate binding; | K10352                  | MYH; myosin heavy chain                            | dre04530 Tight junction - Danio rerio (zebrafish);                                      | IPR002928; IPR004009; IPR001609; IPR027417; IPR027401;                                                                                                                                                  | Myosin tail; Myosin, N-terminal, SH3-like; Myosin head, motor domain; P-loop containing nucleoside triphosphate hydrolase; Myosin-like IQ motif-containing domain; |
| B8A568 | myh2.1 | Uncharacterized protein            | _VK(cr)NLTEEMAQDESIGK_    | 978   | 1 | HATENKVKNLTEEMA | .....K.L..... | nuclear |                                                                                                                                                                                                                                                                                                                                                                                                                                                                                                   | intracellular organelle; intracellular non-membrane-bounded organelle; cytoskeleton part; intracellular organelle part; macromolecular complex; intracellular part; cell; actin cytoskeleton; organelle part; non-membrane-bounded organelle; organelle; cytoskeleton; cell part; intracellular; myosin complex; protein complex;                                                                                                                                                                                                                                                                                                                                                                                                                                                       | ATP binding; motor activity; nucleoside phosphate binding; nucleoside binding; ion binding; hydrolase activity, acting on acid anhydrides; hydrolase activity; nucleotide binding; nucleoside-triphosphatase activity; organic cyclic compound binding; heterocyclic compound binding; ribonucleoside binding; carbohydrate derivative binding; pyrophosphatase activity; catalytic activity; ribonucleotide binding; binding; purine ribonucleoside binding; anion binding; purine ribonucleotide binding; adenylyl ribonucleotide binding; adenylyl nucleotide binding; purine nucleoside binding; hydrolase activity, acting on acid anhydrides, in phosphorus-containing anhydrides; purine nucleotide binding; small molecule binding; purine ribonucleoside triphosphate binding; | K10352                  | MYH; myosin heavy chain                            | dre04530 Tight junction - Danio rerio (zebrafish);                                      | IPR002928; IPR004009; IPR001609; IPR027417; IPR027401;                                                                                                                                                  | Myosin tail; Myosin, N-terminal, SH3-like; Myosin head, motor domain; P-loop containing nucleoside triphosphate hydrolase; Myosin-like IQ motif-containing domain; |
| B8A561 | myh2.2 | Uncharacterized protein            | _VK(cr)NLTEEMAQDESIGK_    | 978   | 1 | HATENKVKNLTEEMA | .....K.L..... | nuclear |                                                                                                                                                                                                                                                                                                                                                                                                                                                                                                   | intracellular organelle; intracellular non-membrane-bounded organelle; cytoskeleton part; intracellular organelle part; macromolecular complex; intracellular part; cell; actin cytoskeleton; organelle part; non-membrane-bounded organelle; organelle; cytoskeleton; cell part; intracellular; myosin complex; protein complex;                                                                                                                                                                                                                                                                                                                                                                                                                                                       | ATP binding; motor activity; nucleoside phosphate binding; nucleoside binding; ion binding; hydrolase activity, acting on acid anhydrides; hydrolase activity; nucleotide binding; nucleoside-triphosphatase activity; organic cyclic compound binding; heterocyclic compound binding; ribonucleoside binding; carbohydrate derivative binding; pyrophosphatase activity; catalytic activity; ribonucleotide binding; binding; purine ribonucleoside binding; anion binding; purine ribonucleotide binding; adenylyl ribonucleotide binding; adenylyl nucleotide binding; purine nucleoside binding; hydrolase activity, acting on acid anhydrides, in phosphorus-containing anhydrides; purine nucleotide binding; small molecule binding; purine ribonucleoside triphosphate binding; | K10352                  | MYH; myosin heavy chain                            | dre04530 Tight junction - Danio rerio (zebrafish);                                      | IPR002928; IPR004009; IPR001609; IPR027417; IPR027401;                                                                                                                                                  | Myosin tail; Myosin, N-terminal, SH3-like; Myosin head, motor domain; P-loop containing nucleoside triphosphate hydrolase; Myosin-like IQ motif-containing domain; |



|        |         |                                    |                          |      |   |                 |               |                       |                                                                                                                                                                                                                                                                                             |                                                                                                                                                                                                                                                                                                                                                                                                                                                                                                                                                                                                                                                            |                                                                                                                                                                                                                                                                                                                                                                                                                                                                                                                                                                                                                                                                                                                                                                                         |                                             |                                                                                                                                                                                        |                                                                                                                                           |                                                                                                                                                                                                                                                                                                                             |                                                                                                                                                                    |
|--------|---------|------------------------------------|--------------------------|------|---|-----------------|---------------|-----------------------|---------------------------------------------------------------------------------------------------------------------------------------------------------------------------------------------------------------------------------------------------------------------------------------------|------------------------------------------------------------------------------------------------------------------------------------------------------------------------------------------------------------------------------------------------------------------------------------------------------------------------------------------------------------------------------------------------------------------------------------------------------------------------------------------------------------------------------------------------------------------------------------------------------------------------------------------------------------|-----------------------------------------------------------------------------------------------------------------------------------------------------------------------------------------------------------------------------------------------------------------------------------------------------------------------------------------------------------------------------------------------------------------------------------------------------------------------------------------------------------------------------------------------------------------------------------------------------------------------------------------------------------------------------------------------------------------------------------------------------------------------------------------|---------------------------------------------|----------------------------------------------------------------------------------------------------------------------------------------------------------------------------------------|-------------------------------------------------------------------------------------------------------------------------------------------|-----------------------------------------------------------------------------------------------------------------------------------------------------------------------------------------------------------------------------------------------------------------------------------------------------------------------------|--------------------------------------------------------------------------------------------------------------------------------------------------------------------|
| Q6IQX1 | myh2    | Uncharacterized protein (Fragment) | ..VK(cr)NLTEEMASQDESIAK_ | 978  | 1 | HATENKVKNLTEEMA | .....K.L..... | cytosol               | response to stress; response to stimulus;                                                                                                                                                                                                                                                   | intracellular organelle; intracellular non-membrane-bounded organelle; cytoskeleton part; intracellular organelle part; macromolecular complex; intracellular part; cell; actin cytoskeleton; organelle part; non-membrane-bounded organelle; organelle; cytoskeleton; cell part; intracellular; myosin complex; protein complex;                                                                                                                                                                                                                                                                                                                          | ATP binding; motor activity; nucleoside phosphate binding; nucleoside binding; ion binding; hydrolase activity, acting on acid anhydrides; hydrolase activity; nucleotide binding; nucleoside-triphosphatase activity; organic cyclic compound binding; heterocyclic compound binding; ribonucleoside binding; carbohydrate derivative binding; pyrophosphatase activity; catalytic activity; ribonucleotide binding; binding; purine ribonucleoside binding; anion binding; purine ribonucleotide binding; adenylyl ribonucleotide binding; adenylyl nucleotide binding; purine nucleoside binding; hydrolase activity, acting on acid anhydrides, in phosphorus-containing anhydrides; purine nucleotide binding; small molecule binding; purine ribonucleoside triphosphate binding; | K10352                                      | MYH; myosin heavy chain                                                                                                                                                                | dre04530 Tight junction - Danio rerio (zebrafish);                                                                                        | IPR002928; IPR004009; IPR001609; IPR027417; IPR027401;                                                                                                                                                                                                                                                                      | Myosin tail; Myosin, N-terminal, SH3-like; Myosin head, motor domain; P-loop containing nucleoside triphosphate hydrolase; Myosin-like IQ motif-containing domain; |
| AZBGX6 | myh4    | Uncharacterized protein            | ..VK(cr)NLTEEMASQDESIAK_ | 978  | 1 | HATENKVKNLTEEMA | .....K.L..... | cytosol               |                                                                                                                                                                                                                                                                                             | intracellular organelle; intracellular non-membrane-bounded organelle; cytoskeleton part; intracellular organelle part; macromolecular complex; intracellular part; cell; actin cytoskeleton; organelle part; non-membrane-bounded organelle; organelle; cytoskeleton; cell part; intracellular; myosin complex; protein complex;                                                                                                                                                                                                                                                                                                                          | ATP binding; motor activity; nucleoside phosphate binding; nucleoside binding; ion binding; hydrolase activity, acting on acid anhydrides; hydrolase activity; nucleotide binding; nucleoside-triphosphatase activity; organic cyclic compound binding; heterocyclic compound binding; ribonucleoside binding; carbohydrate derivative binding; pyrophosphatase activity; catalytic activity; ribonucleotide binding; binding; purine ribonucleoside binding; anion binding; purine ribonucleotide binding; adenylyl ribonucleotide binding; adenylyl nucleotide binding; purine nucleoside binding; hydrolase activity, acting on acid anhydrides, in phosphorus-containing anhydrides; purine nucleotide binding; small molecule binding; purine ribonucleoside triphosphate binding; | K10352                                      | MYH; myosin heavy chain                                                                                                                                                                | dre04530 Tight junction - Danio rerio (zebrafish);                                                                                        | IPR002928; IPR004009; IPR027417; IPR001609; IPR027401;                                                                                                                                                                                                                                                                      | Myosin tail; Myosin, N-terminal, SH3-like; P-loop containing nucleoside triphosphate hydrolase; Myosin head, motor domain; Myosin-like IQ motif-containing domain; |
| Q57Z29 | apob.1  | Uncharacterized protein            | ..VK(cr)VVDVVK_          | 2320 | 1 | IEKLEKWKVVDVVKK | .....K.V..... | endoplasmic reticulum | response to chemical; response to stimulus;                                                                                                                                                                                                                                                 | lipid transporter activity; substrate-specific transporter activity; transporter activity;                                                                                                                                                                                                                                                                                                                                                                                                                                                                                                                                                                 |                                                                                                                                                                                                                                                                                                                                                                                                                                                                                                                                                                                                                                                                                                                                                                                         |                                             |                                                                                                                                                                                        |                                                                                                                                           | Vitellogen, superhelical; Vitellinogen, open beta-sheet, subdomain 1; Vitellinogen, open beta-sheet, subdomain 2; Lipid transport protein, N-terminal; Lipid transport protein, beta-sheet shell; Vitellinogen, beta-sheet N-terminal; Armadillo-type fold; Vitellinogen, open beta-sheet; Lipid transport, open beta-sheet |                                                                                                                                                                    |
| B8A561 | myh2.1  | Uncharacterized protein            | ..VLNASVIEGQFDNK(cr)K_   | 741  | 1 | EQGFIDNKKASEKLL |               | nuclear               |                                                                                                                                                                                                                                                                                             | intracellular organelle; intracellular non-membrane-bounded organelle; cytoskeleton part; intracellular organelle part; macromolecular complex; intracellular part; cell; actin cytoskeleton; organelle part; non-membrane-bounded organelle; organelle; cytoskeleton; cell part; intracellular; myosin complex; protein complex;                                                                                                                                                                                                                                                                                                                          | ATP binding; motor activity; nucleoside phosphate binding; nucleoside binding; ion binding; hydrolase activity, acting on acid anhydrides; hydrolase activity; nucleotide binding; nucleoside-triphosphatase activity; organic cyclic compound binding; heterocyclic compound binding; ribonucleoside binding; carbohydrate derivative binding; pyrophosphatase activity; catalytic activity; ribonucleotide binding; binding; purine ribonucleoside binding; anion binding; purine ribonucleotide binding; adenylyl ribonucleotide binding; adenylyl nucleotide binding; purine nucleoside binding; hydrolase activity, acting on acid anhydrides, in phosphorus-containing anhydrides; purine nucleotide binding; small molecule binding; purine ribonucleoside triphosphate binding; | K10352                                      | MYH; myosin heavy chain                                                                                                                                                                | dre04530 Tight junction - Danio rerio (zebrafish);                                                                                        | IPR002928; IPR004009; IPR001609; IPR027417; IPR027401;                                                                                                                                                                                                                                                                      | Myosin tail; Myosin, N-terminal, SH3-like; Myosin head, motor domain; P-loop containing nucleoside triphosphate hydrolase; Myosin-like IQ motif-containing domain; |
| Q804W0 | pvalb.1 | Parvalbumin 1                      | ..VLTDK(cr)ETK_          | 81   | 1 | NARVLTDKETKAFLS | .....DK.....  | cytosol               |                                                                                                                                                                                                                                                                                             | cation binding; metal ion binding; calcium ion binding; binding; ion binding;                                                                                                                                                                                                                                                                                                                                                                                                                                                                                                                                                                              |                                                                                                                                                                                                                                                                                                                                                                                                                                                                                                                                                                                                                                                                                                                                                                                         |                                             |                                                                                                                                                                                        |                                                                                                                                           | EF-hand domain; pair; EF-hand domain;                                                                                                                                                                                                                                                                                       |                                                                                                                                                                    |
| P13104 | tpma    | Tropomyosin alpha-1 chain          | ..VLTDK(cr)LK_           | 231  | 1 | EIKVLTDLKAEATR  | .....DK.....  | cytosol               |                                                                                                                                                                                                                                                                                             | cytoskeleton; organelle; intracellular organelle; intracellular non-membrane-bounded organelle; cell part; intracellular; cytoplasm; intracellular part; cell; non-membrane-bounded organelle;                                                                                                                                                                                                                                                                                                                                                                                                                                                             |                                                                                                                                                                                                                                                                                                                                                                                                                                                                                                                                                                                                                                                                                                                                                                                         | K10373                                      | TPM1; tropomyosin 1                                                                                                                                                                    | dre04261 Cardiac muscle contraction - Danio rerio (zebrafish); dre04261 Adrenergic signaling in cardiomyocytes - Danio rerio (zebrafish); |                                                                                                                                                                                                                                                                                                                             |                                                                                                                                                                    |
| Q77306 | ckmb    | Ckmb protein                       | ..VLTK(cr)DIYNK_         | 35   | 1 | HMSKVLTKDIYNKLR | .....K.L..... | cytosol               |                                                                                                                                                                                                                                                                                             | ATP binding; nucleoside phosphate binding; nucleoside binding; ion binding; nucleotide binding; organic cyclic compound binding; heterocyclic compound binding; ribonucleoside binding; carbohydrate derivative binding; kinase activity; catalytic activity; ribonucleotide binding; binding; purine ribonucleoside binding; anion binding; purine ribonucleotide binding; adenylyl ribonucleotide binding; adenylyl nucleotide binding; purine nucleoside binding; transferase activity; transferase activity, transferring phosphorus-containing groups; purine nucleotide binding; small molecule binding; purine ribonucleoside triphosphate binding; |                                                                                                                                                                                                                                                                                                                                                                                                                                                                                                                                                                                                                                                                                                                                                                                         |                                             |                                                                                                                                                                                        |                                                                                                                                           | IPR022413; IPR022414; IPR014746;                                                                                                                                                                                                                                                                                            | ATP-guanido phosphotransferase, N-terminal; ATP-guanido phosphotransferase, catalytic domain; Glutamine synthetase/guanido kinase, catalytic domain;               |
| A2BH43 | ckma    | Uncharacterized protein            | ..VLTK(cr)JEMYGK_        | 36   | 1 | HMAKVLTKEMYGKLR |               | cytosol               |                                                                                                                                                                                                                                                                                             | ATP binding; nucleoside phosphate binding; nucleoside binding; ion binding; nucleotide binding; organic cyclic compound binding; heterocyclic compound binding; ribonucleoside binding; carbohydrate derivative binding; kinase activity; catalytic activity; ribonucleotide binding; binding; purine ribonucleoside binding; anion binding; purine ribonucleotide binding; adenylyl ribonucleotide binding; adenylyl nucleotide binding; purine nucleoside binding; transferase activity; transferase activity, transferring phosphorus-containing groups; purine nucleotide binding; small molecule binding; purine ribonucleoside triphosphate binding; | K00933                                                                                                                                                                                                                                                                                                                                                                                                                                                                                                                                                                                                                                                                                                                                                                                  | E2.7.3.2; creatine kinase [EC:2.7.3.2]      | dre00330 Arginine and proline metabolism - Danio rerio (zebrafish); dre01100 Metabolic pathways - Danio rerio (zebrafish);                                                             | IPR022413; IPR022414; IPR014746;                                                                                                          | ATP-guanido phosphotransferase, N-terminal; ATP-guanido phosphotransferase, catalytic domain; Glutamine synthetase/guanido kinase, catalytic domain;                                                                                                                                                                        |                                                                                                                                                                    |
| Q503C7 | pygma   | Alpha-1,4 glucan phosphorylase     | ..VLPNDNFEGK(cr)ELR_     | 290  | 1 | NDNPFEGKELRLKGE | .....K.L..... | cytosol               | metabolic process; carbohydrate metabolic process; primary metabolic process; organic substance metabolic process;                                                                                                                                                                          | organic cyclic compound binding; heterocyclic compound binding; transferase activity, transferring hexosyl groups; catalytic activity; binding; ion binding; phosphatase activity; anion binding; transferase activity, transferring glycosyl groups; cofactor binding; transferase activity; pyridoxal phosphate binding; glycosyl phosphorylase activity;                                                                                                                                                                                                                                                                                                | K00688                                                                                                                                                                                                                                                                                                                                                                                                                                                                                                                                                                                                                                                                                                                                                                                  | E2.4.1.1; starch phosphorylase [EC:2.4.1.1] | dre01100 Metabolic pathways - Danio rerio (zebrafish); dre04910 Insulin signaling pathway - Danio rerio (zebrafish); dre00500 Starch and sucrose metabolism - Danio rerio (zebrafish); |                                                                                                                                           |                                                                                                                                                                                                                                                                                                                             |                                                                                                                                                                    |
| EP9D64 | ctcf6a  | Uncharacterized protein            | ..VMK(cr)IDLK_           | 228  | 1 | FIEDRVMKIIDLK   | .....K.L..... | cytosol               | protein folding; metabolic process; cellular protein metabolic process; cellular macromolecule metabolic process; macromolecule metabolic process; protein metabolic process; primary metabolic process; cellular process; cellular metabolic process; organic substance metabolic process; | intracellular part; cell; cell part; intracellular; cytoplasm;                                                                                                                                                                                                                                                                                                                                                                                                                                                                                                                                                                                             | ATP binding; nucleoside phosphate binding; nucleoside binding; ion binding; nucleotide binding; organic cyclic compound binding; heterocyclic compound binding; ribonucleoside binding; carbohydrate derivative binding; ribonucleotide binding; binding; purine ribonucleoside binding; anion binding; purine ribonucleotide binding; adenylyl ribonucleotide binding; adenylyl nucleotide binding; purine nucleoside binding; purine nucleotide binding; small molecule binding; purine ribonucleoside triphosphate binding;                                                                                                                                                                                                                                                          |                                             |                                                                                                                                                                                        |                                                                                                                                           | TCP-1-like chaperonin domain; GroEL-like apical domain; GroEL-like equatorial domain;                                                                                                                                                                                                                                       |                                                                                                                                                                    |

|        |        |                         |                      |      |   |                 |               |                 |                                                                                                                                                                                                                                                                                                                                                                                                                                                                                                                                                                                                                                                                                                                                                                                                                                                                                                                                                                                                                                                                                                                                                                    |                                                                                                                                                                                                                                                                                                                                                                                                                                 |                                                                                                                                                                                                                                                                                                                                                                                                                                                                                                                                                                                                                                                                                                                                                                                                |                                                  |                                               |                                                                                                                             |                                                               |                                                                                                                                                                                                              |                                                                                                                                                                           |
|--------|--------|-------------------------|----------------------|------|---|-----------------|---------------|-----------------|--------------------------------------------------------------------------------------------------------------------------------------------------------------------------------------------------------------------------------------------------------------------------------------------------------------------------------------------------------------------------------------------------------------------------------------------------------------------------------------------------------------------------------------------------------------------------------------------------------------------------------------------------------------------------------------------------------------------------------------------------------------------------------------------------------------------------------------------------------------------------------------------------------------------------------------------------------------------------------------------------------------------------------------------------------------------------------------------------------------------------------------------------------------------|---------------------------------------------------------------------------------------------------------------------------------------------------------------------------------------------------------------------------------------------------------------------------------------------------------------------------------------------------------------------------------------------------------------------------------|------------------------------------------------------------------------------------------------------------------------------------------------------------------------------------------------------------------------------------------------------------------------------------------------------------------------------------------------------------------------------------------------------------------------------------------------------------------------------------------------------------------------------------------------------------------------------------------------------------------------------------------------------------------------------------------------------------------------------------------------------------------------------------------------|--------------------------------------------------|-----------------------------------------------|-----------------------------------------------------------------------------------------------------------------------------|---------------------------------------------------------------|--------------------------------------------------------------------------------------------------------------------------------------------------------------------------------------------------------------|---------------------------------------------------------------------------------------------------------------------------------------------------------------------------|
| E9QB1  | ctcb   | Clathrin heavy chain    | _VNIPK(cr)VLR_       | 1347 | 1 | WSRVNIPKLVRAEQ  | .....K.L..... | cytosol         | <p>transport vesicle membrane; membrane; clathrin coat of trans-Golgi network vesicle; cytoplasmic vesicle; organelle membrane; membrane-bounded vesicle; cell periphery; cytoplasmic membrane-bounded vesicle; vesicle; Golgi-associated vesicle membrane; cytoplasm; cytoplasmic vesicle part; macromolecular complex; intracellular part; vesicle coat; cell; organelle part; coated vesicle membrane; trans-Golgi network transport vesicle; clathrin-coated vesicle; membrane part; cell part; intracellular; Golgi apparatus part; trans-Golgi network transport vesicle membrane; clathrin coat of coated pit; membrane-bounded organelle; intracellular organelle; bounding membrane of organelle; coated membrane; intracellular organelle part; Golgi membrane; vesicle membrane; endomembrane system; coated vesicle; clathrin-coated vesicle membrane; Golgi-associated vesicle; plasma membrane; cytoplasmic vesicle membrane; intracellular membrane-bounded organelle; organelle; clathrin vesicle coat; plasma membrane part; clathrin coat; membrane coat; Golgi apparatus; transport vesicle; coated pit; protein complex; cytoplasmic part;</p> | <p>establishment of protein localization; transport; intracellular transport; cellular macromolecule localization; establishment of localization in cell; vesicle-mediated transport; intracellular protein transport; organic substance transport; protein localization; macromolecule localization; cellular protein localization; localization; protein transport; establishment of localization; cellular localization;</p> | <p>structural molecule activity;</p>                                                                                                                                                                                                                                                                                                                                                                                                                                                                                                                                                                                                                                                                                                                                                           | K04846                                           | CLTC; clathrin heavy chain                    | dre04144 Endocytosis - Danio rerio (zebrafish); dre04142 Lysosome - Danio rerio (zebrafish);                                | <p>IPR016025; IPR015348; IPR011990; IPR016024; IPR001473;</p> | <p>Clathrin, heavy chain, linker/propeller domain; Clathrin, heavy chain, linker, core motif; Tetraatricopeptide-like helical domain; Armadillo-type fold; Clathrin, heavy chain, propeller, N-terminal;</p> |                                                                                                                                                                           |
| Q6IQ3  | vamp3  | Uncharacterized protein | _VNVDK(cr)VLER_      | 38   | 1 | IMRWVVKVLERDQK  | .....DK.....  | plasma membrane | <p>transport; localization; vesicle-mediated transport; establishment of localization;</p>                                                                                                                                                                                                                                                                                                                                                                                                                                                                                                                                                                                                                                                                                                                                                                                                                                                                                                                                                                                                                                                                         | <p>intrinsic component of membrane; membrane; integral component of membrane; membrane part;</p>                                                                                                                                                                                                                                                                                                                                | <p>structural molecule activity;</p>                                                                                                                                                                                                                                                                                                                                                                                                                                                                                                                                                                                                                                                                                                                                                           | K13505                                           | VAMP3; vesicle-associated membrane protein 3  | dre04145 Phagosome - Danio rerio (zebrafish); dre04130 SNARE interactions in vesicular transport - Danio rerio (zebrafish); | <p>IPR001388; Synaptobrevin;</p>                              |                                                                                                                                                                                                              |                                                                                                                                                                           |
| Q6PBW7 | rps19  | Ribosomal protein S19   | _VPDVVDK(cr)LAK_     | 39   | 1 | PDWVDKVLAKHKEL  |               | cytosol         | <p>cellular protein metabolic process; biosynthetic process; primary metabolic process; cellular metabolic process; organic substance biosynthetic process; cellular biosynthetic process; organic substance metabolic process; metabolic process; cellular macromolecule biosynthetic process; cellular macromolecule metabolic process; gene expression; macromolecule metabolic process; protein metabolic process; macromolecule biosynthetic process; translation; cellular process;</p>                                                                                                                                                                                                                                                                                                                                                                                                                                                                                                                                                                                                                                                                      | <p>ribosome; organelle; intracellular organelle; intracellular non-membrane-bounded organelle; cell part; intracellular; cytoplasm; macromolecular complex; intracellular part; cell; ribonucleoprotein complex; cytoplasmic part; non-membrane-bounded organelle;</p>                                                                                                                                                          | <p>structural constituent of ribosome; structural molecule activity;</p>                                                                                                                                                                                                                                                                                                                                                                                                                                                                                                                                                                                                                                                                                                                       | K02966                                           | RP-S19e; small subunit ribosomal protein S19e | dre03010 Ribosome - Danio rerio (zebrafish);                                                                                |                                                               |                                                                                                                                                                                                              |                                                                                                                                                                           |
| Q6IQX1 | myh2   | Uncharacterized protein | _VQLELNQV(cr)GEIDR_  | 1571 | 1 | QLELNQVKGIEDRKL | ..E...K.....  | cytosol         | <p>response to stress; response to stimulus;</p>                                                                                                                                                                                                                                                                                                                                                                                                                                                                                                                                                                                                                                                                                                                                                                                                                                                                                                                                                                                                                                                                                                                   | <p>intracellular organelle; intracellular non-membrane-bounded organelle; cytoskeletal part; intracellular organelle part; macromolecular complex; intracellular part; cell; actin cytoskeleton; organelle part; non-membrane-bounded organelle; organelle; cytoskeleton; cell part; intracellular; myosin complex; protein complex;</p>                                                                                        | <p>ATP binding; motor activity; nucleoside phosphate binding; nucleoside binding; ion binding; hydrolase activity, acting on acid anhydrides; hydrolase activity; nucleotide binding; nucleoside-triphosphatase activity; organic cyclic compound binding; heterocyclic compound binding; ribonucleoside binding; carbohydrate derivative binding; pyrophosphatase activity; catalytic activity; ribonucleotide binding; binding; purine ribonucleoside binding; anion binding; purine ribonucleotide binding; adenylyl ribonucleotide binding; adenylyl nucleotide binding; purine nucleoside binding; hydrolase activity, acting on acid anhydrides, in phosphorus-containing anhydrides; purine nucleotide binding; small molecule binding; purine ribonucleoside triphosphate binding;</p> | <p>response to stress; response to stimulus;</p> | K10352                                        | MYH; myosin heavy chain                                                                                                     | dre04530 Tight junction - Danio rerio (zebrafish);            | <p>IPR002928; IPR004009; IPR001609; IPR027417; IPR027401;</p>                                                                                                                                                | <p>Myosin tail; Myosin, N-terminal, SH3-like; Myosin head, motor domain; P-loop containing nucleoside triphosphate hydrolase; Myosin-like IQ motif-containing domain;</p> |
| B8A568 | myh2.1 | Uncharacterized protein | _VQLELNQV(cr)SEIDRK_ | 1571 | 1 | QLELNQVKEIDRKL  | ..E...K.....  | nuclear         |                                                                                                                                                                                                                                                                                                                                                                                                                                                                                                                                                                                                                                                                                                                                                                                                                                                                                                                                                                                                                                                                                                                                                                    | <p>intracellular organelle; intracellular non-membrane-bounded organelle; cytoskeletal part; intracellular organelle part; macromolecular complex; intracellular part; cell; actin cytoskeleton; organelle part; non-membrane-bounded organelle; organelle; cytoskeleton; cell part; intracellular; myosin complex; protein complex;</p>                                                                                        | <p>ATP binding; motor activity; nucleoside phosphate binding; nucleoside binding; ion binding; hydrolase activity, acting on acid anhydrides; hydrolase activity; nucleotide binding; nucleoside-triphosphatase activity; organic cyclic compound binding; heterocyclic compound binding; ribonucleoside binding; carbohydrate derivative binding; pyrophosphatase activity; catalytic activity; ribonucleotide binding; binding; purine ribonucleoside binding; anion binding; purine ribonucleotide binding; adenylyl ribonucleotide binding; adenylyl nucleotide binding; purine nucleoside binding; hydrolase activity, acting on acid anhydrides, in phosphorus-containing anhydrides; purine nucleotide binding; small molecule binding; purine ribonucleoside triphosphate binding;</p> |                                                  | K10352                                        | MYH; myosin heavy chain                                                                                                     | dre04530 Tight junction - Danio rerio (zebrafish);            | <p>IPR002928; IPR004009; IPR001609; IPR027417; IPR027401;</p>                                                                                                                                                | <p>Myosin tail; Myosin, N-terminal, SH3-like; Myosin head, motor domain; P-loop containing nucleoside triphosphate hydrolase; Myosin-like IQ motif-containing domain;</p> |
| B8A561 | myh2.2 | Uncharacterized protein | _VQLELNQV(cr)SEIDRK_ | 1571 | 1 | QLELNQVKEIDRKL  | ..E...K.....  | nuclear         |                                                                                                                                                                                                                                                                                                                                                                                                                                                                                                                                                                                                                                                                                                                                                                                                                                                                                                                                                                                                                                                                                                                                                                    | <p>intracellular organelle; intracellular non-membrane-bounded organelle; cytoskeletal part; intracellular organelle part; macromolecular complex; intracellular part; cell; actin cytoskeleton; organelle part; non-membrane-bounded organelle; organelle; cytoskeleton; cell part; intracellular; myosin complex; protein complex;</p>                                                                                        | <p>ATP binding; motor activity; nucleoside phosphate binding; nucleoside binding; ion binding; hydrolase activity, acting on acid anhydrides; hydrolase activity; nucleotide binding; nucleoside-triphosphatase activity; organic cyclic compound binding; heterocyclic compound binding; ribonucleoside binding; carbohydrate derivative binding; pyrophosphatase activity; catalytic activity; ribonucleotide binding; binding; purine ribonucleoside binding; anion binding; purine ribonucleotide binding; adenylyl ribonucleotide binding; adenylyl nucleotide binding; purine nucleoside binding; hydrolase activity, acting on acid anhydrides, in phosphorus-containing anhydrides; purine nucleotide binding; small molecule binding; purine ribonucleoside triphosphate binding;</p> |                                                  | K10352                                        | MYH; myosin heavy chain                                                                                                     | dre04530 Tight junction - Danio rerio (zebrafish);            | <p>IPR002928; IPR004009; IPR001609; IPR027417; IPR027401;</p>                                                                                                                                                | <p>Myosin tail; Myosin, N-terminal, SH3-like; Myosin head, motor domain; P-loop containing nucleoside triphosphate hydrolase; Myosin-like IQ motif-containing domain;</p> |
| B3DFN3 | lnnb2  | Lamin B2                | _VSEK(cr)EEVTR_      | 61   | 1 | LQFKVSEKEEVTRE  | .....K.E..... | nuclear         |                                                                                                                                                                                                                                                                                                                                                                                                                                                                                                                                                                                                                                                                                                                                                                                                                                                                                                                                                                                                                                                                                                                                                                    | <p>intracellular organelle; intracellular non-membrane-bounded organelle; cytoskeletal part; intracellular organelle part; macromolecular complex; intracellular part; cell; organelle part; non-membrane-bounded organelle; organelle; cytoskeleton; intermediate filament cytoskeleton; cell part; intracellular; intermediate filament; protein complex;</p>                                                                 | <p>structural molecule activity;</p>                                                                                                                                                                                                                                                                                                                                                                                                                                                                                                                                                                                                                                                                                                                                                           | K07611                                           |                                               |                                                                                                                             | <p>IPR001322; Lamin Tail Domain;</p>                          |                                                                                                                                                                                                              |                                                                                                                                                                           |

|        |                 |                                                     |                          |      |   |                             |                       |                                                                                                                                                                                                                                                                                                                                                                                                                                                                                                                                                                                                                                                                                                                                                                                                                                                                                                                                                                                                                                                                                                                                                                                                                                                                                    |        |                                                                                                                                                                                                                                                                                                                                                                                                                                                         |
|--------|-----------------|-----------------------------------------------------|--------------------------|------|---|-----------------------------|-----------------------|------------------------------------------------------------------------------------------------------------------------------------------------------------------------------------------------------------------------------------------------------------------------------------------------------------------------------------------------------------------------------------------------------------------------------------------------------------------------------------------------------------------------------------------------------------------------------------------------------------------------------------------------------------------------------------------------------------------------------------------------------------------------------------------------------------------------------------------------------------------------------------------------------------------------------------------------------------------------------------------------------------------------------------------------------------------------------------------------------------------------------------------------------------------------------------------------------------------------------------------------------------------------------------|--------|---------------------------------------------------------------------------------------------------------------------------------------------------------------------------------------------------------------------------------------------------------------------------------------------------------------------------------------------------------------------------------------------------------------------------------------------------------|
| Q08CK7 | igt2bp1         | Insulin-like growth factor 2 mRNA-binding protein 1 | ...VTAEDLVK(cr)TFEDYK_   | 20   | 1 | VTAEDLVKTFEDYKI             | cytosol,nuclear       | <p>regulation of cellular process; regulation of gene expression; regulation of cellular biosynthetic process; regulation of primary metabolic process; regulation of macromolecule metabolic process; posttranscriptional regulation of gene expression; regulation of macromolecule biosynthetic process; regulation of cellular metabolic process; regulation of biological process; regulation of cellular protein metabolic process; regulation of translation; regulation of protein metabolic process; regulation of biosynthetic process; regulation of metabolic process; biological regulation; regulation of cellular macromolecule biosynthetic process;</p> <p>organelle; intracellular membrane-bounded organelle; intracellular organelle; nucleus; CRD-mediated mRNA stability complex; cell part; intracellular cytoplasm; macromolecular complex; intracellular part; membrane-bounded organelle; protein complex; cell; cytoplasmic part;</p> <p>organic cyclic compound binding; heterocyclic compound binding; RNA binding; mRNA binding; poly(A) RNA binding; nucleoside phosphate binding; mRNA 5'-UTR binding; binding; nucleic acid binding; nucleotide binding; small molecule binding;</p>                                                              | K17391 | <p>K Homology domain; K Homology domain, type 1; RNA recognition motif domain; Nucleotide-binding, alpha-beta sheet;</p> <p>IPR004087; IPR004088; IPR005054; IPR012677;</p>                                                                                                                                                                                                                                                                             |
| Q4QRF4 | si:dkryp-46h3.6 | Histone H3.2                                        | ...VTIM(ox)PK(cr)DIQLAR_ | 123  | 1 | KRVTMPKDIQLARR .....K.L.... | nuclear               | <p>cellular component biogenesis; cellular component organization; nucleosome organization; cellular macromolecular complex assembly; chromatin assembly or disassembly; protein complex subunit organization; macromolecular complex subunit organization; protein-DNA complex assembly; DNA packaging; nucleosome assembly; chromosome organization; cellular component assembly; macromolecular complex assembly; organelle organization; chromatin organization; protein complex biogenesis; chromatin assembly; cellular process; protein complex assembly; cellular component organization or biogenesis; protein-DNA complex subunit organization; DNA conformation change;</p> <p>intracellular organelle; intracellular non-membrane-bounded organelle; intracellular organelle part; macromolecular complex; intracellular part; cell; organelle part; DNA bending complex; chromosomal part; nucleosome; non-membrane-bounded organelle; intracellular membrane-bounded organelle; organelle; nucleus; chromatin; cell part; intracellular; chromosome; membrane-bounded organelle; protein complex; protein-DNA complex; DNA packaging complex;</p> <p>organic cyclic compound binding; heterocyclic compound binding; DNA binding; binding; nucleic acid binding;</p> | K11253 | <p>Histone-fold; Histone core;</p> <p>IPR009072; IPR007125;</p>                                                                                                                                                                                                                                                                                                                                                                                         |
| Q4QRF4 | si:dkryp-46h3.6 | Histone H3.2                                        | ...VTIMPK(cr)DIQLAR_     | 123  | 1 | KRVTMPKDIQLARR .....K.L.... | nuclear               | <p>cellular component biogenesis; cellular component organization; nucleosome organization; cellular macromolecular complex assembly; chromatin assembly or disassembly; protein complex subunit organization; macromolecular complex subunit organization; protein-DNA complex assembly; DNA packaging; nucleosome assembly; chromosome organization; cellular component assembly; macromolecular complex assembly; organelle organization; chromatin organization; protein complex biogenesis; chromatin assembly; cellular process; protein complex assembly; cellular component organization or biogenesis; protein-DNA complex subunit organization; DNA conformation change;</p> <p>intracellular organelle; intracellular non-membrane-bounded organelle; intracellular organelle part; macromolecular complex; intracellular part; cell; organelle part; DNA bending complex; chromosomal part; nucleosome; non-membrane-bounded organelle; intracellular membrane-bounded organelle; organelle; nucleus; chromatin; cell part; intracellular; chromosome; membrane-bounded organelle; protein complex; protein-DNA complex; DNA packaging complex;</p> <p>organic cyclic compound binding; heterocyclic compound binding; DNA binding; binding; nucleic acid binding;</p> | K11253 | <p>Histone-fold; Histone core;</p> <p>IPR009072; IPR007125;</p>                                                                                                                                                                                                                                                                                                                                                                                         |
| Q6PC53 | ppiab           | Peptidyl-prolyl cis-trans isomerase                 | ...VVDGLDVDAIEK(cr)K_    | 144  | 1 | DVVDIEKKGSSGK               | cytosol               | <p>cellular protein metabolic process; protein peptidyl-prolyl isomerization; peptidyl-proline modification; primary metabolic process; cellular metabolic process; organic substance metabolic process; protein folding; peptidyl-amino acid modification; metabolic process; cellular macromolecule metabolic process; cellular protein modification process; protein metabolic process; macromolecule metabolic process; macromolecule modification; protein modification process; cellular process;</p> <p>peptidyl-prolyl cis-trans isomerase activity; isomerase activity; catalytic activity; cis-trans isomerase activity;</p>                                                                                                                                                                                                                                                                                                                                                                                                                                                                                                                                                                                                                                             | K03767 | <p>Cyclophilin-type peptidyl-prolyl cis-trans isomerase domain; Cyclophilin-like domain;</p> <p>IPR002130; IPR029000;</p>                                                                                                                                                                                                                                                                                                                               |
| Q5T229 | apobb.1         | Uncharacterized protein                             | ...VVDVVK(cr)K_          | 2326 | 1 | VKVDVVKKFSVDVD              | endoplasmic reticulum | <p>response to chemical; response to stimulus;</p> <p>lipid transporter activity; substrate-specific transporter activity; transporter activity;</p>                                                                                                                                                                                                                                                                                                                                                                                                                                                                                                                                                                                                                                                                                                                                                                                                                                                                                                                                                                                                                                                                                                                               |        | <p>Vitellogen, superhelical; Vitellinogen, open beta-sheet, subdomain 1; Vitellinogen, open beta-sheet, subdomain 2; Lipid transport protein, N-terminal; Lipid transport protein, beta-sheet shell; Vitellinogen, beta-sheet N-terminal; Armadillo-type fold; Vitellinogen, open beta-sheet; Lipid transport, open beta-sheet;</p> <p>IPR011030; IPR015817; IPR015818; IPR015819; IPR01747; IPR015819; IPR015816; IPR016024; IPR015255; IPR009454;</p> |



|        |        |                                        |                 |     |   |                 |               |         |                                                                                                                                                                                                                                                                                                                                                                                                                                                                                                                                                                                                                                                                                                                                                                                                                                                                                                                                                                       |        |                                                                                                                                                                                                                                                                                                                                          |
|--------|--------|----------------------------------------|-----------------|-----|---|-----------------|---------------|---------|-----------------------------------------------------------------------------------------------------------------------------------------------------------------------------------------------------------------------------------------------------------------------------------------------------------------------------------------------------------------------------------------------------------------------------------------------------------------------------------------------------------------------------------------------------------------------------------------------------------------------------------------------------------------------------------------------------------------------------------------------------------------------------------------------------------------------------------------------------------------------------------------------------------------------------------------------------------------------|--------|------------------------------------------------------------------------------------------------------------------------------------------------------------------------------------------------------------------------------------------------------------------------------------------------------------------------------------------|
| F1QUR3 | -      | Protein disulfide-isomerase (Fragment) | _YVMK(cr)EEFSR_ | 294 | 1 | KGDKYVMKEEFSRDG | .....K.E..... | cytosol | <p>regulation of cellular process; regulation of biological quality; small molecule metabolic process; cell redox homeostasis; single-organism cellular process; ether metabolic process; cellular homeostasis; single-organism process; organic substance metabolic process; homeostatic process; metabolic process; regulation of biological process; single-organism metabolic process; glycerol ether metabolic process; cellular process; biological regulation;</p> <p>organelle; intracellular membrane-bounded organelle; intracellular organelle; endoplasmic reticulum; cell part; intracellular; cytoplasm; endomembrane system; intracellular part; membrane-bounded organelle; cell; cytoplasmic part;</p> <p>protein disulfide oxidoreductase activity; oxidoreductase activity, acting on a sulfur group of donors; disulfide oxidoreductase activity; electron carrier activity; isomerase activity; catalytic activity; oxidoreductase activity;</p> | K08056 | <p>PDIA3; protein disulfide isomerase family A, member 3 [EC:5.3.4.1]</p> <p>dre04141 Protein processing in endoplasmic reticulum - Danio rerio (zebrafish);</p> <p>IPR005788; IPR013766; IPR012336;</p> <p>Disulphide isomerase; Thioredoxin domain; Thioredoxin-like fold;</p>                                                         |
| E7FC21 | nt5c2a | Uncharacterized protein                | _YVVK(cr)DAK_   | 228 | 1 | NLEKYVVKDAKLPLL | .E...K.....   | cytosol | <p>metal ion binding; cation binding; binding; ion binding;</p>                                                                                                                                                                                                                                                                                                                                                                                                                                                                                                                                                                                                                                                                                                                                                                                                                                                                                                       | K01081 | <p>dre00240 Pyrimidine metabolism - Danio rerio (zebrafish); dre01100 Metabolic pathways - Danio rerio (zebrafish); dre00760 Nicotinate and nicotinamide metabolism - Danio rerio (zebrafish); dre00230 Purine metabolism - Danio rerio (zebrafish);</p> <p>E3.1.3.5; 5-nucleotidase [EC:3.1.3.5]</p> <p>IPR023214; HAD-like domain;</p> |

| Zebrafish  |            |                                       |                          |          |                |                      | Human for proteins |            |                                                     |                |             | Human for sequence |                   |          |            |             |         |
|------------|------------|---------------------------------------|--------------------------|----------|----------------|----------------------|--------------------|------------|-----------------------------------------------------|----------------|-------------|--------------------|-------------------|----------|------------|-------------|---------|
| Uniprot ID | Gene names | Protein names                         | Modified sequence        | Position | # modification | Surrounding sequence | Uniprot ID         | Gene names | Protein names                                       | Identities (%) | Blast Score | E-value            | Sequence identity | Position | Amino acid | Blast Score | E-value |
| B8A568     | myhz1.1    | Uncharacterized protein               | _GK(cr)QAFTQQIEELK(cr)R_ | 1307     | 2              | VSQLTRGKQAFTQQI      | P12882             | MYH1       | Myosin-1                                            | 82.1           | 3208        | 0E+00              | VSQLSRGKQAFTQQI   | 1309     | K          | 46.9        | 1E-08   |
| B8A568     | myhz1.1    | Uncharacterized protein               | _GK(cr)QAFTQQIEELK(cr)R_ | 1318     | 2              | TQIEELKRQIEEEV       | P12882             | MYH1       | Myosin-1                                            | 82.1           | 3208        | 0E+00              | TQIEELKRQLEEEI    | 1320     | K          | 46.4        | 2E-08   |
| B8A568     | myhz1.1    | Uncharacterized protein               | _K(cr)LAEK(cr)DEEIEQIK_  | 1577     | 2              | VKSEIDRKLAEKDEE      | P12882             | MYH1       | Myosin-1                                            | 82.1           | 3208        | 0E+00              | VKSEVDRKIAEKDEE   | 1579     | K          | 44.3        | 9E-08   |
| B8A568     | myhz1.1    | Uncharacterized protein               | _K(cr)LAEK(cr)DEEIEQIK_  | 1581     | 2              | IDRKLAEKDEEIEQI      | P12882             | MYH1       | Myosin-1                                            | 82.1           | 3208        | 0E+00              | VDRKIAEKDEEIQM    | 1583     | K          | 40.1        | 3E-06   |
| B8A568     | myhz1.1    | Uncharacterized protein               | _LQDLVDK(cr)LQLK(cr)VK_  | 1872     | 2              | RLQDLVDKLQLKVK       | P12882             | MYH1       | Myosin-1                                            | 82.1           | 3208        | 0E+00              | RLQDLVDKLQAKVKS   | 1874     | K          | 41.4        | 1E-06   |
| B8A568     | myhz1.1    | Uncharacterized protein               | _LQDLVDK(cr)LQLK(cr)VK_  | 1876     | 2              | LVDKLQLKVKAYKRQ      | P12882             | MYH1       | Myosin-1                                            | 82.1           | 3208        | 0E+00              | LVDKLQAKVKS YKRQ  | 1878     | K          | 42.2        | 5E-07   |
| B8A561     | myhz1.2    | Uncharacterized protein               | _LAEK(cr)DEEIEQIK(cr)R_  | 1581     | 2              | IDRKLAEKDEEIEQI      | P12882             | MYH1       | Myosin-1                                            | 82.1           | 3207        | 0E+00              | VDRKIAEKDEEIQM    | 1583     | K          | 40.1        | 3E-06   |
| B8A561     | myhz1.2    | Uncharacterized protein               | _LAEK(cr)DEEIEQIK(cr)R_  | 1589     | 2              | DEEIEQIKRNSQRIT      | P12882             | MYH1       | Myosin-1                                            | 82.1           | 3207        | 0E+00              | DEEIQMKNRHIRIV    | 1591     | K          | 31.2        | 4E-03   |
| B8A561     | myhz1.2    | Uncharacterized protein               | _K(cr)LAEK(cr)DEEIEQIK_  | 1577     | 2              | VKSEIDRKLAEKDEE      | P12882             | MYH1       | Myosin-1                                            | 82.1           | 3207        | 0E+00              | VKSEVDRKIAEKDEE   | 1579     | K          | 44.3        | 9E-08   |
| B8A561     | myhz1.2    | Uncharacterized protein               | _K(cr)LAEK(cr)DEEIEQIK_  | 1581     | 2              | IDRKLAEKDEEIEQI      | P12882             | MYH1       | Myosin-1                                            | 82.1           | 3207        | 0E+00              | VDRKIAEKDEEIQM    | 1583     | K          | 40.1        | 3E-06   |
| B8A561     | myhz1.2    | Uncharacterized protein               | _GK(cr)QAFTQQIEELK(cr)R_ | 1307     | 2              | VSQLTRGKQAFTQQI      | P12882             | MYH1       | Myosin-1                                            | 82.1           | 3207        | 0E+00              | VSQLSRGKQAFTQQI   | 1309     | K          | 46.9        | 1E-08   |
| B8A561     | myhz1.2    | Uncharacterized protein               | _GK(cr)QAFTQQIEELK(cr)R_ | 1318     | 2              | TQIEELKRQIEEEV       | P12882             | MYH1       | Myosin-1                                            | 82.1           | 3207        | 0E+00              | TQIEELKRQLEEEI    | 1320     | K          | 46.4        | 2E-08   |
| Q6NWK4     | atp6v1e1b  | Atp6v1e1 protein                      | _AEEEFNIEK(cr)GR_        | 42       | 1              | EEEFNIEKGRLVQQT      | P36543             | ATP6V1E1   | V-type proton ATPase subunit E 1                    | 78.3           | 367         | 1E-131             | EEEFNIEKGRLVQQT   | 42       | K          | 52          | 3E-09   |
| Q1MTC4     | vtg2       | Uncharacterized protein               | _LVPEFAHDK(cr)TYVYK_     | 28       | 1              | VPEFAHDKTYVYKYE      | P04275             | VWF        | von Willebrand factor                               | 25.7           | 51.2        | 1E-06              | -                 | -        | -          | -           | -       |
| B0R198     | vdac3      | Uncharacterized protein               | _SAK(cr)DIFSK_           | 40       | 1              | ADLGKSAKDIFSKGY      | P45880             | VDAC2      | Voltage-dependent anion-selective channel protein 2 | 71.9           | 402         | 1E-143             | ADLGKAARDIFNKG    | 26       | R          | 37.1        | 3E-05   |
| Q8AWD0     | vdac2      | Uncharacterized protein               | _SAK(cr)DIFNK_           | 15       | 1              | ADLGKSAKDIFNKG       | P45880             | VDAC2      | Voltage-dependent anion-selective channel protein 2 | 83.0           | 504         | 0E+00              | ADLGKAARDIFNKG    | 26       | R          | 40.5        | 2E-06   |
| B0R198     | vdac3      | Uncharacterized protein               | _VK(cr)ELGLSLNQK_        | 90       | 1              | LETKYVKELGLSLN       | P45880             | VDAC2      | Voltage-dependent anion-selective channel protein 2 | 71.9           | 402         | 1E-143             | -                 | -        | -          | -           | -       |
| Q6IQK3     | vamp3      | Uncharacterized protein               | _VNVDK(cr)VLER_          | 38       | 1              | IMRVNVDKVLERDQK      | Q15836             | VAMP3      | Vesicle-associated membrane protein 3               | 90.8           | 143         | 5E-47              | IMRVNVDKVLERDQK   | 35       | K          | 52.8        | 9E-11   |
| B0R193     | ubb        | Uncharacterized protein               | _TITLEVEPSDTIENVK(cr)AK_ | 27       | 1              | SDTIENVKAKIQDKE      | P62979             | RPS27A     | Ubiquitin-40S ribosomal protein S27a                | 97.5           | 159         | 6E-53              | SDTIENVKAKIQDKE   | 27       | K          | 50.3        | 7E-10   |
| B0R193     | ubb        | Uncharacterized protein               | _LIFAGK(cr)QLEDGR_       | 48       | 1              | QRLIFAGKQLEDGR       | P62979             | RPS27A     | Ubiquitin-40S ribosomal protein S27a                | 97.5           | 159         | 6E-53              | QRLIFAGKQLEDGR    | 48       | K          | 50.3        | 7E-10   |
| Q6Y149     | uchl1      | Ubiquitin carboxyl-terminal hydrolase | _AK(cr)ELEQNK_           | 126      | 1              | MSPAERAKELEQNKA      | P09936             | UCHL1      | Ubiquitin carboxyl-terminal hydrolase isozyme L1    | 66.1           | 305         | 4E-107             | -                 | -        | -          | -           | -       |
| Q6PE34     | zgc:65894  | Uncharacterized protein               | _MSMK(cr)EVDEQMLNVQNK_   | 324      | 1              | FRGRMSMKEVDEQML      | P68371             | TUBB4B     | Tubulin beta-4B chain                               | 97.1           | 914         | 0E+00              | FRGRMSMKEVDEQML   | 324      | K          | 55.4        | 1E-11   |
| Q6NWJ5     | tuba8l4    | Tubulin alpha 6                       | _GDVVPK(cr)DVNSAIATIK_   | 326      | 1              | YRGDVPKDVNSAIA       | Q71U36             | TUBA1A     | Tubulin alpha-1A chain                              | 96.9           | 920         | 0E+00              | YRGDVPKDVNSAIA    | 326      | K          | 47.3        | 8E-09   |
| E7EXP0     | tnnt3b     | Uncharacterized protein               | _IPDGDK(cr)VDFDDIQK_     | 32       | 1              | PKIPDGDKVDFDDIQ      | P45378             | TNNT3      | Troponin T, fast skeletal muscle                    | 72.5           | 279         | 5E-96              | PKIPEGEKVDFDDIQ   | 64       | K          | 47.3        | 8E-09   |
| E7EXP0     | tnnt3b     | Uncharacterized protein               | _IPDGDKVDFDDIQK(cr)K_    | 40       | 1              | VDFDDIQKQRQNKDL      | P45378             | TNNT3      | Troponin T, fast skeletal muscle                    | 72.5           | 279         | 5E-96              | VDFDDIQKQRQNKDL   | 72       | K          | 52.4        | 1E-10   |
| Q9I8U9     | tnnt3a     | Fast skeletal muscle troponin T       | _VDFDDIQK(cr)K_          | 38       | 1              | VDFDDIQKQRHNDKT      | P45378             | TNNT3      | Troponin T, fast skeletal muscle                    | 70.6           | 269         | 3E-92              | VDFDDIQKQRQNKDL   | 72       | K          | 46.4        | 2E-08   |
| E7EXP0     | tnnt3b     | Uncharacterized protein               | _EEEELIALK(cr)DR_        | 72       | 1              | EEELIALKDRIEKRR      | P45378             | TNNT3      | Troponin T, fast skeletal muscle                    | 72.5           | 279         | 5E-96              | EEELVALKERIEKRR   | 104      | K          | 46.4        | 2E-08   |
| E7EXP0     | tnnt3b     | Uncharacterized protein               | _KKEEEELIALK(cr)DR_      | 72       | 1              | EEELIALKDRIEKRR      | P45378             | TNNT3      | Troponin T, fast skeletal muscle                    | 72.5           | 279         | 5E-96              | EEELVALKERIEKRR   | 104      | K          | 46.4        | 2E-08   |

|        |            |                                 |                           |     |   |                  |        |       |                                  |      |     |        |                  |     |   |      |       |
|--------|------------|---------------------------------|---------------------------|-----|---|------------------|--------|-------|----------------------------------|------|-----|--------|------------------|-----|---|------|-------|
| Q9I8U9 | tnnt3a     | Fast skeletal muscle troponin T | _QLNIDHLNEDK(cr)LR_       | 173 | 1 | IDHLNEDKLRDKAQE  | P45378 | TNNT3 | Troponin T, fast skeletal muscle | 70.6 | 269 | 3E-92  | IDHLGEDKLRDKAKE  | 206 | K | 42.6 | 4E-07 |
| E7EXP0 | tnnt3b     | Uncharacterized protein         | _VEELSK(cr)YSK_           | 220 | 1 | KRVEELSKYSKKGAA  | P45378 | TNNT3 | Troponin T, fast skeletal muscle | 72.5 | 279 | 5E-96  | -                | -   | - | -    | -     |
| Q9I8U9 | tnnt3a     | Fast skeletal muscle troponin T | _TLESEK(cr)FEHMER_        | 192 | 1 | IKTLESEKFEHMERL  | P45378 | TNNT3 | Troponin T, fast skeletal muscle | 70.6 | 269 | 3E-92  | -                | -   | - | -    | -     |
| Q6IQ92 | tnni1a1    | Troponin I                      | _DLHQK(cr)IDVVDEER_       | 73  | 1 | LCRDLHQKIDVVDEE  | P19237 | TNNI1 | Troponin I, slow skeletal muscle | 60.1 | 198 | 3E-66  | LCRELHAKVEVVDEE  | 72  | K | 40.5 | 2E-06 |
| Q6DHP2 | tnni2a.2   | Troponin I, skeletal, fast 2b.2 | _ELHQK(cr)IDVVDEER_       | 67  | 1 | LCKELHQKIDVVDEE  | P48788 | TNNI2 | Troponin I, fast skeletal muscle | 60.9 | 217 | 1E-73  | LCKQLHAKIDAAEEE  | 71  | K | 34.6 | 3E-04 |
| Q0D2W2 | tnni2a.4   | Troponin I, skeletal, fast 2b.2 | _ANLK(cr)QVK_             | 138 | 1 | MDLRANLKQVKKEVK  | P48788 | TNNI2 | Troponin I, fast skeletal muscle | 60.8 | 217 | 8E-74  | MDLRANLKQVKKEDT  | 142 | K | 45.2 | 7E-07 |
| Q0D2W2 | tnni2a.4   | Uncharacterized protein         | _NIEDK(cr)AGMDGR_         | 162 | 1 | WRKNIEDKAGMDGRK  | P48788 | TNNI2 | Troponin I, fast skeletal muscle | 60.8 | 217 | 8E-74  | WRKNIEEKSGMEGRK  | 168 | K | 46   | 2E-08 |
| F1QCC0 | tnni2b.1   | Uncharacterized protein         | _SDKEIEDLK(cr)JK_         | 93  | 1 | DKEIEDLKIKVQDLK  | P48788 | TNNI2 | Troponin I, fast skeletal muscle | 60.9 | 220 | 7E-75  | -                | -   | - | -    | -     |
| F1QCC0 | tnni2b.1   | Uncharacterized protein         | _SDK(cr)EIEDLK_           | 87  | 1 | TKVAKSDKEIEDLKI  | P48788 | TNNI2 | Troponin I, fast skeletal muscle | 60.9 | 220 | 7E-75  | -                | -   | - | -    | -     |
| Q0D2W2 | tnni2a.4   | Fast muscle troponin I          | _ADK(cr)EIEDLK_           | 87  | 1 | AKVAKADKEIEDLKI  | P48788 | TNNI2 | Troponin I, fast skeletal muscle | 60.8 | 217 | 8E-74  | -                | -   | - | -    | -     |
| Q0D2W2 | tnni2a.4   | Fast muscle troponin I          | _ADKEIEDLK(cr)JK_         | 93  | 1 | DKEIEDLKIKVIDLK  | P48788 | TNNI2 | Troponin I, fast skeletal muscle | 60.8 | 217 | 8E-74  | -                | -   | - | -    | -     |
| Q0D2W2 | tnni2a.4   | Fast muscle troponin I          | _LHQQIDK(cr)VDEER_        | 70  | 1 | KLHQQIDKVDDEERYD | P19429 | TNNI3 | Troponin I, cardiac muscle       | 61.0 | 169 | 9E-54  | QLHARVDKVDDEERYD | 108 | K | 38.8 | 8E-06 |
| Q6IQD7 | tpm2       | Uncharacterized protein         | _AEVAEAK(cr)SGDLEELK_     | 189 | 1 | RAEVAEAKSGDLEEE  | P07951 | TPM2  | Tropomyosin beta chain           | 89.0 | 444 | 4E-159 | RAEVAESKCGDLEEE  | 189 | K | 42.2 | 5E-07 |
| Q6P0W3 | tpm3       | Uncharacterized protein         | _EDKYEIEIK(cr)ILTDK_      | 226 | 1 | DKYEIEIKILTDKLK  | P06753 | TPM3  | Tropomyosin alpha-3 chain        | 94.7 | 479 | 6E-174 | DKYEIEIKILTDKLK  | 227 | K | 52   | 2E-10 |
| P13104 | tpma       | Tropomyosin alpha-1 chain       | _AEQAETDK(cr)K_           | 29  | 1 | AEQAETDKKAAEERS  | P09493 | TPM1  | Tropomyosin alpha-1 chain        | 92.3 | 492 | 5E-179 | AEQAEDKKAEDRS    | 29  | K | 42.6 | 5E-06 |
| P13104 | tpma       | Tropomyosin alpha-1 chain       | _SK(cr)QLEDDLVALQK_       | 37  | 1 | KAAEERSKQLEDDL   | P09493 | TPM1  | Tropomyosin alpha-1 chain        | 92.3 | 492 | 5E-179 | KAAEDRSKQLEDEL   | 37  | K | 44.3 | 9E-08 |
| P13104 | tpma       | Tropomyosin alpha-1 chain       | _QLEDDLVALQK(cr)K_        | 48  | 1 | DDLVALQKCLKATED  | P09493 | TPM1  | Tropomyosin alpha-1 chain        | 92.3 | 492 | 5E-179 | DELVSLQKCLKGTED  | 48  | K | 40.5 | 2E-06 |
| P13104 | tpma       | Tropomyosin alpha-1 chain       | _LK(cr)ATEDELK_           | 51  | 1 | VALQKCLKATEDELD  | P09493 | TPM1  | Tropomyosin alpha-1 chain        | 92.3 | 492 | 5E-179 | VSLQKCLKGTEDELD  | 51  | K | 43.1 | 3E-07 |
| P13104 | tpma       | Tropomyosin alpha-1 chain       | _LK(cr)ATEDELDKYSEALK_    | 51  | 1 | VALQKCLKATEDELD  | P09493 | TPM1  | Tropomyosin alpha-1 chain        | 92.3 | 492 | 5E-179 | VSLQKCLKGTEDELD  | 51  | K | 43.1 | 3E-07 |
| P13104 | tpma       | Tropomyosin alpha-1 chain       | _ATEDELK(cr)YSEALK_       | 59  | 1 | ATEDELDKYSEALKD  | P09493 | TPM1  | Tropomyosin alpha-1 chain        | 92.3 | 492 | 5E-179 | GTEDELDKYSEALKD  | 61  | K | 47.7 | 9E-08 |
| P13104 | tpma       | Tropomyosin alpha-1 chain       | _ATEDELDKYSEALK(cr)DAQEK_ | 65  | 1 | DKYSEALKDAQEKLE  | P09493 | TPM1  | Tropomyosin alpha-1 chain        | 92.3 | 492 | 5E-179 | DKYSEALKDAQEKLE  | 65  | K | 50.3 | 1E-08 |
| P13104 | tpma       | Tropomyosin alpha-1 chain       | _DAQEK(cr)LELAEK_         | 70  | 1 | ALKDAQEKLELAEKK  | P09493 | TPM1  | Tropomyosin alpha-1 chain        | 92.3 | 492 | 5E-179 | ALKDAQEKLELAEKK  | 70  | K | 48.6 | 3E-09 |
| P13104 | tpma       | Uncharacterized protein         | _LATALQK(cr)LEEAKEK_      | 112 | 1 | RLATALQKLEEAKEA  | P09493 | TPM1  | Tropomyosin alpha-1 chain        | 92.3 | 492 | 5E-179 | RLATALQKLEEAKEA  | 112 | K | 48.1 | 4E-09 |
| P13104 | tpma       | Tropomyosin alpha-1 chain       | _LEEAKEK(cr)AADESER_      | 118 | 1 | QKLEEAKEKAADESER | P09493 | TPM1  | Tropomyosin alpha-1 chain        | 92.3 | 492 | 5E-179 | QKLEEAKEKAADESER | 118 | K | 49.4 | 1E-09 |
| P13104 | tpma       | Uncharacterized protein         | _ALK(cr)DEEK_             | 136 | 1 | VIENRALKDEEKMEI  | P09493 | TPM1  | Tropomyosin alpha-1 chain        | 92.3 | 492 | 5E-179 | VIESRAQKDEEKMEI  | 136 | K | 40.9 | 2E-05 |
| P13104 | tpma       | Uncharacterized protein         | _EAK(cr)HIAEEADR_         | 152 | 1 | EIQLKEAKHIAEAD   | P09493 | TPM1  | Tropomyosin alpha-1 chain        | 92.3 | 492 | 5E-179 | EIQLKEAKHIAEDAD  | 152 | K | 48.1 | 4E-09 |
| P13104 | tpma       | Uncharacterized protein         | _K(cr)YEEVAR_             | 161 | 1 | IAEEADRKYEEVARK  | P09493 | TPM1  | Tropomyosin alpha-1 chain        | 92.3 | 492 | 5E-179 | IAEDADRKYEEVARK  | 161 | K | 48.6 | 3E-09 |
| P13104 | tpma       | Uncharacterized protein         | _K(cr)LVIVEGELER_         | 168 | 1 | KYEEVARKLVIVEGE  | P09493 | TPM1  | Tropomyosin alpha-1 chain        | 92.3 | 492 | 5E-179 | KYEEVARKLVIEESD  | 168 | K | 42.6 | 4E-07 |
| Q6IQD7 | tpm2       | Uncharacterized protein         | _K(cr)LVILEGELER_         | 168 | 1 | KYEEVARKLVILEGE  | P09493 | TPM1  | Tropomyosin alpha-1 chain        | 85.6 | 452 | 2E-163 | KYEEVARKLVIEESD  | 168 | K | 41.4 | 1E-06 |
| P13104 | tpma       | Tropomyosin alpha-1 chain       | _TVTNNMK(cr)SLEAQAEK_     | 205 | 1 | KTVTNNMKSLEAQAE  | P09493 | TPM1  | Tropomyosin alpha-1 chain        | 92.3 | 492 | 5E-179 | KTVTNNLKSLEAQAE  | 205 | K | 46   | 2E-08 |
| P13104 | tpma       | Uncharacterized protein         | _EDKYEIEIK(cr)VLTDK_      | 226 | 1 | DKYEIEIKVLTDKLK  | P09493 | TPM1  | Tropomyosin alpha-1 chain        | 92.3 | 492 | 5E-179 | DRYEEIEKVLSDKLK  | 226 | K | 45.6 | 3E-08 |
| P13104 | tpma       | Tropomyosin alpha-1 chain       | _VLTDK(cr)LK_             | 231 | 1 | EIKVLTDKLKEAETR  | P09493 | TPM1  | Tropomyosin alpha-1 chain        | 92.3 | 492 | 5E-179 | EIKVLSDKLKEAETR  | 231 | K | 46.9 | 1E-08 |
| E7FBZ3 | zgc:171719 | Uncharacterized protein         | _LEK(cr)TIDDEEK_          | 251 | 1 | RSVAKLEKTIDDEE   | P09493 | TPM1  | Tropomyosin alpha-1 chain        | 85.8 | 406 | 4E-145 | RSVTKLEKSIDDEE   | 251 | K | 41.4 | 1E-06 |

|        |            |                                                  |                           |       |   |                  |        |         |                                                                 |      |       |        |                  |       |   |      |       |
|--------|------------|--------------------------------------------------|---------------------------|-------|---|------------------|--------|---------|-----------------------------------------------------------------|------|-------|--------|------------------|-------|---|------|-------|
| P13104 | tpma       | Tropomyosin alpha-1 chain                        | _LEK(cr)TIDDELEDELYAQK_   | 251   | 1 | RSVAKLEKTIDDED   | P09493 | TPM1    | Tropomyosin alpha-1 chain                                       | 92.3 | 492   | 5E-179 | RSVTKLEKSIDDED   | 251   | K | 43.9 | 1E-07 |
| P13104 | tpma       | Tropomyosin alpha-1 chain                        | _TIDDELEDELYAQK(cr)LK_    | 264   | 1 | EDELYAQKLKYKAIS  | P09493 | TPM1    | Tropomyosin alpha-1 chain                                       | 92.3 | 492   | 5E-179 | EDELYAQKLKYKAIS  | 264   | K | 51.1 | 4E-10 |
| E9QBF0 | tpi1b      | Triosephosphate isomerase                        | _TASPQQAQEVHDK(cr)LR_     | 194   | 1 | QAQEVHDKLRQW___  | P60174 | TP1     | Triosephosphate isomerase                                       | 82.9 | 327   | 2E-115 | QAQEVHEKLRGW___  | 225   | K | 35.4 | 7E-05 |
| B8JHR2 | tpt1       | Translationally-controlled tumor protein homolog | _LQETSVDK(cr)K_           | 72    | 1 | LQETSVDKSKSYTAYI | P13693 | TPT1    | Translationally-controlled tumor protein                        | 67.5 | 233   | 1E-80  | -                | -     | - | -    | -     |
| Q29RA2 | zgc:136908 | Uncharacterized protein                          | _NAPAIIFIDELEDAIPK(cr)R_  | 314   | 1 | ELDAIAPKREKTHGE  | P55072 | VCP     | Transitional endoplasmic reticulum ATPase                       | 85.7 | 1382  | 0E+00  | ELDAIAPKREKTHGE  | 312   | K | 50.3 | 7E-10 |
| Q29RA2 | zgc:136908 | Uncharacterized protein                          | _LEILQIHTK(cr)NMK_        | 388   | 1 | EILQIHTKNMKSLED  | P55072 | VCP     | Transitional endoplasmic reticulum ATPase                       | 85.7 | 1382  | 0E+00  | EILQIHTKNMKSLED  | 386   | K | 47.7 | 6E-09 |
| G1K2X0 | ttnb       | Uncharacterized protein (Fragment)               | _AYHVEK(cr)R_             | 22276 | 1 | VKAYHVEKREASKKA  | Q8WZ42 | TTN     | Titin                                                           | 63.4 | 29927 | 0E+00  | VKNYHIEKREASKKA  | 27243 | K | 43.1 | 2E-07 |
| G1K2X0 | ttnb       | Uncharacterized protein (Fragment)               | _VHHYVVEK(cr)R_           | 24446 | 1 | VHHYVVEKREASRRT  | Q8WZ42 | TTN     | Titin                                                           | 63.4 | 29927 | 0E+00  | IHHYVVEKREASRRS  | 29414 | K | 46.9 | 1E-08 |
| G1K2X0 | ttnb       | Uncharacterized protein (Fragment)               | _VHEK(cr)NLR_             | 25335 | 1 | EWTKVHEKNLRVTEH  | Q8WZ42 | TTN     | Titin                                                           | 63.4 | 29927 | 0E+00  | -                | -     | - | -    | -     |
| G1K2X0 | ttnb       | Uncharacterized protein (Fragment)               | _VK(cr)IIDVSK_            | 11960 | 1 | PDPPTRVKIIDVSKG  | Q8WZ42 | TTN     | Titin                                                           | 63.4 | 29927 | 0E+00  | -                | -     | - | -    | -     |
| G1K2X0 | ttnb       | Uncharacterized protein (Fragment)               | _GVTISK(cr)VK_            | 27496 | 1 | QRGVTISKVKIAPFE  | Q8WZ42 | TTN     | Titin                                                           | 63.4 | 29927 | 0E+00  | -                | -     | - | -    | -     |
| B0S758 | ttna       | Uncharacterized protein                          | _EK(cr)ELESGRPEGEIVGR_    | 7294  | 1 | IEFLKKEKELESGRP  | Q8WZ42 | TTN     | Titin                                                           | 57.5 | 3667  | 0E+00  | -                | -     | - | -    | -     |
| Q7ZUI4 | zgc:56493  | Thioredoxin                                      | _LEEMVK(cr)QHK_           | 104   | 1 | TKLEEMVKQHKN___  | P10599 | TXN     | Thioredoxin                                                     | 60.0 | 137   | 2E-44  | -                | -     | - | -    | -     |
| Q7ZYX4 | cct6a      | Chaperonin containing TCP1, subunit 6A (Zeta 1)  | _DK(cr)ALAVLEEVK_         | 129   | 1 | GFEAAKDKALAVLEE  | P40227 | CCT6A   | T-complex protein 1 subunit zeta                                | 87.6 | 970   | 0E+00  | GFEAAKDKALQFLEE  | 129   | K | 35   | 2E-04 |
| E9QD64 | cct6a      | Uncharacterized protein                          | _VMK(cr)IIDLK_            | 228   | 1 | FIEDRVMKIIDLKNK  | P40227 | CCT6A   | T-complex protein 1 subunit zeta                                | 72.8 | 410   | 7E-144 | FIEDRVKKIIEKLRK  | 273   | K | 39.7 | 4E-06 |
| Q7ZYX4 | cct6a      | Chaperonin containing TCP1, subunit 6A (Zeta 1)  | _GIDPFSLDALAK(cr)EGIVALR_ | 307   | 1 | FSLDALAKEGIVALR  | P40227 | CCT6A   | T-complex protein 1 subunit zeta                                | 87.6 | 970   | 0E+00  | FSLDALSKEGIVALR  | 307   | K | 45.6 | 3E-08 |
| E9QD64 | cct6a      | Uncharacterized protein                          | _DK(cr)ALAVLEEVK_         | 84    | 1 | IAKAAKDKALAVLEE  | P40227 | CCT6A   | T-complex protein 1 subunit zeta                                | 72.8 | 410   | 7E-144 | -                | -     | - | -    | -     |
| Q6PH46 | cct4       | T-complex protein 1 subunit delta                | _MK(cr)IMVIK_             | 315   | 1 | LHFLNKMIMVIKDI   | P50991 | CCT4    | T-complex protein 1 subunit delta                               | 88.8 | 946   | 0E+00  | LHFLNKMIMVIKDI   | 321   | K | 54.9 | 2E-11 |
| F1Q9K1 | smarcc1a   | Uncharacterized protein                          | _HOGTITEDK(cr)SK_         | 196   | 1 | QGTITEDKSKATHII  | Q8TAQ2 | SMARCC2 | SWI/SNF complex subunit SMARCC2                                 | 67.0 | 1237  | 0E+00  | QGTVTEDKNASHVV   | 171   | K | 33.3 | 7E-04 |
| F1REG7 | oxct1a     | Uncharacterized protein (Fragment)               | _AVFDVVK(cr)DK_           | 75    | 1 | KAVFDVVKDKGLTLI  | P55809 | OXCT1   | Succinyl-CoA:3-ketoacid coenzyme A transferase 1, mitochondrial | 83.3 | 173   | 9E-54  | KAVFDVVKDKGLTLI  | 480   | K | 44.3 | 1E-06 |
| F1QFC0 | hspa9      | Uncharacterized protein                          | _NAK(cr)VLENAEGAR_        | 79    | 1 | VMDGKNAKVLENAEG  | P38646 | HSPA9   | Stress-70 protein, mitochondrial                                | 89.4 | 1216  | 0E+00  | VMEGKQAKVLENAEG  | 76    | K | 42.6 | 4E-07 |
| F1QFC0 | hspa9      | Uncharacterized protein                          | _RFDDAEVQK(cr)DLK_        | 138   | 1 | FDDAEVQKDLKNVPY  | P38646 | HSPA9   | Stress-70 protein, mitochondrial                                | 89.4 | 1216  | 0E+00  | YDDPEVQKDIKNVPF  | 135   | K | 39.2 | 6E-06 |
| F1R446 | spna2      | Uncharacterized protein                          | _K(cr)HEDFDK_             | 1489  | 1 | SVEALIKKHEDFDKA  | Q13813 | SPTAN1  | Spectrin alpha chain, non-erythrocytic 1                        | 90.0 | 4571  | 0E+00  | SVEALIKKHEDFDKA  | 1486  | K | 50.3 | 7E-10 |
| F1Q560 | shank3b    | Uncharacterized protein                          | _GANK(cr)EIK_             | 354   | 1 | LLFRGANKEIKNYNN  | Q9BYB0 | SHANK3  | SH3 and multiple ankyrin repeat domains protein 3               | 53.9 | 1303  | 0E+00  | LLFRGANRDVVRNYS  | 309   | R | 37.5 | 2E-05 |
| E9QIC5 | srsf1a     | Serine/arginine-rich splicing factor 1A          | _TK(cr)DVEDVFYK_          | 29    | 1 | LPPDIRTKDVEDVFY  | Q07955 | SRSF1   | Serine/arginine-rich splicing factor 1                          | 96.5 | 170   | 3E-55  | LPPDIRTKDIEDVFY  | 30    | K | 51.1 | 4E-10 |
| Q64Z20 | atp2a1     | Calcium-transporting ATPase                      | _NAESAIEALK(cr)EYEPENMG_  | 120   | 1 | ESAIEALKEYEPEMG  | O14983 | ATP2A1  | Sarcoplasmic/endoplasmic reticulum calcium ATPase 1             | 85.9 | 1736  | 0E+00  | ENAIEALKEYEPEMG  | 120   | K | 49.4 | 1E-09 |
| Q5U3A4 | atp2a1     | Calcium-transporting ATPase                      | _EYEPENMG(cr)GK(cr)VYR_   | 128   | 1 | EYEPENMGKVVYRDRK | O14983 | ATP2A1  | Sarcoplasmic/endoplasmic reticulum calcium ATPase 1             | 85.6 | 1734  | 0E+00  | EYEPENMGKVVYRDRK | 128   | K | 51.5 | 2E-10 |
| Q64Z20 | atp2a1     | Calcium-transporting ATPase                      | _EYEPENMG(cr)VYR_         | 128   | 1 | EYEPENMGKVVYRDRK | O14983 | ATP2A1  | Sarcoplasmic/endoplasmic reticulum calcium ATPase 1             | 85.9 | 1736  | 0E+00  | EYEPENMGKVVYRDRK | 128   | K | 51.5 | 2E-10 |



|        |          |                                                          |                             |     |   |                  |        |         |                                                         |      |      |        |                 |     |   |      |       |
|--------|----------|----------------------------------------------------------|-----------------------------|-----|---|------------------|--------|---------|---------------------------------------------------------|------|------|--------|-----------------|-----|---|------|-------|
| Q642Z0 | atp2a1   | Calcium-transporting ATPase                              | _EIVPGDIVEVSVGDK(cr)VPADIR_ | 158 | 1 | VEVSVGDKVPADIRI  | O14983 | ATP2A1  | Sarcoplasmic/endoplasmic reticulum calcium ATPase 1     | 85.9 | 1736 | 0E+00  | VEVAVGDKVPADIRI | 158 | K | 46.9 | 1E-08 |
| Q5U3A4 | atp2a1   | Calcium-transporting ATPase                              | _AVNQDK(cr)K_               | 204 | 1 | PRAVNQDKKNMLFSG  | O14983 | ATP2A1  | Sarcoplasmic/endoplasmic reticulum calcium ATPase 1     | 85.6 | 1734 | 0E+00  | PRAVNQDKKNMLFSG | 204 | K | 51.5 | 4E-09 |
| Q642Z0 | atp2a1   | Calcium-transporting ATPase                              | _AVNQDK(cr)K_               | 204 | 1 | PRAVNQDKKNMLFSG  | O14983 | ATP2A1  | Sarcoplasmic/endoplasmic reticulum calcium ATPase 1     | 85.9 | 1736 | 0E+00  | PRAVNQDKKNMLFSG | 204 | K | 51.5 | 4E-09 |
| Q5U3A4 | atp2a1   | Calcium-transporting ATPase                              | _TPLQQK(cr)LDEFGEQSK_       | 252 | 1 | EKTPLQQKLEDFGEQ  | O14983 | ATP2A1  | Sarcoplasmic/endoplasmic reticulum calcium ATPase 1     | 85.6 | 1734 | 0E+00  | DKTPLQQKLEDFGEQ | 252 | K | 49   | 2E-09 |
| Q5U3A4 | atp2a1   | Calcium-transporting ATPase                              | _APVGNK(cr)MFVK_            | 511 | 1 | SKAPVGNKMFVKGAP  | O14983 | ATP2A1  | Sarcoplasmic/endoplasmic reticulum calcium ATPase 1     | 85.6 | 1734 | 0E+00  | SRAAVGNKMFVKGAP | 511 | K | 42.2 | 8E-06 |
| Q642Z0 | atp2a1   | Calcium-transporting ATPase                              | _APVGNK(cr)M(ox)FVK_        | 511 | 1 | SKAPVGNKMFVKGAP  | O14983 | ATP2A1  | Sarcoplasmic/endoplasmic reticulum calcium ATPase 1     | 85.9 | 1736 | 0E+00  | SRAAVGNKMFVKGAP | 511 | K | 42.2 | 8E-06 |
| Q642Z0 | atp2a1   | Calcium-transporting ATPase                              | _APVGNK(cr)MFVK_            | 511 | 1 | SKAPVGNKMFVKGAP  | O14983 | ATP2A1  | Sarcoplasmic/endoplasmic reticulum calcium ATPase 1     | 85.9 | 1736 | 0E+00  | SRAAVGNKMFVKGAP | 511 | K | 42.2 | 8E-06 |
| Q5U3A4 | atp2a1   | Calcium-transporting ATPase                              | _DK(cr)IMAVIK_              | 544 | 1 | LTGPVKDKIMAVIKE  | O14983 | ATP2A1  | Sarcoplasmic/endoplasmic reticulum calcium ATPase 1     | 85.6 | 1734 | 0E+00  | LTGPVKEKIMAVIKE | 544 | K | 48.1 | 4E-09 |
| Q642Z0 | atp2a1   | Calcium-transporting ATPase                              | _DK(cr)IMAVIK_              | 544 | 1 | LTGPVKDKIMAVIKE  | O14983 | ATP2A1  | Sarcoplasmic/endoplasmic reticulum calcium ATPase 1     | 85.9 | 1736 | 0E+00  | LTGPVKEKIMAVIKE | 544 | K | 48.1 | 4E-09 |
| Q6NXC1 | rbm4.3   | Uncharacterized protein                                  | _LHVANVEK(cr)GTDDDEL_       | 87  | 1 | LHVANVEKGTDDDEL  | Q9BWF3 | RBM4    | RNA-binding protein 4                                   | 39.7 | 241  | 3E-78  | -               | -   | - | -    | -     |
| Q6P027 | rlbp1b   | Cellular retinaldehyde-binding protein b                 | _AKDELNETDEK(cr)R_          | 58  | 1 | ELNETDEKRTSAVKE  | P12271 | RLBP1   | Retinaldehyde-binding protein 1                         | 71.1 | 462  | 2E-166 | -               | -   | - | -    | -     |
| O42248 | gnb21l   | Guanine nucleotide-binding protein subunit beta-2-like 1 | _DK(cr)TIIMWK_              | 38  | 1 | ILSASRDKTIIMWKL  | P63244 | RACK1   | Receptor of activated protein C kinase 1                | 95.6 | 636  | 0E+00  | ILSASRDKTIIMWKL | 38  | K | 52.8 | 9E-11 |
| F1RBK3 | -        | Pyruvate kinase                                          | _IISK(cr)LENHEGVR_          | 269 | 1 | KDIRIISKLENHEGV  | P14618 | PKM     | Pyruvate kinase PKM                                     | 77.0 | 865  | 0E+00  | KNIKIISKIENHEGV | 270 | K | 41.8 | 7E-07 |
| F1RBK3 | -        | Pyruvate kinase                                          | _GSGTEEVK(cr)LVK_           | 132 | 1 | GSGTEEVKLVKGNI   | P14618 | PKM     | Pyruvate kinase PKM                                     | 77.0 | 865  | 0E+00  | -               | -   | - | -    | -     |
| Q90ZM2 | sec61al1 | Protein transport protein Sec61 subunit alpha-like 1     | _IEVGDTPK(cr)DR_            | 107 | 1 | IEVGDTPKDRALFNG  | P61619 | SEC61A1 | Protein transport protein Sec61 subunit alpha isoform 1 | 97.1 | 949  | 0E+00  | IEVGDTPKDRALFNG | 107 | K | 50.3 | 7E-10 |
| Q90ZM2 | sec61al1 | Protein transport protein Sec61 subunit alpha-like 1     | _DVAK(cr)QLK_               | 392 | 1 | SSAKDVAKQLKEQQM  | P61619 | SEC61A1 | Protein transport protein Sec61 subunit alpha isoform 1 | 97.1 | 949  | 0E+00  | SSAKDVAKQLKEQQM | 392 | K | 49.8 | 1E-09 |
| Q6XG62 | icn      | Protein S100 (Fragment)                                  | _YSGK(cr)EGDK_              | 23  | 1 | TFHKYSGKEGDKLTL  | P26447 | S100A4  | Protein S100-A4                                         | 57.5 | 115  | 7E-36  | TFHKYSGKEGDKFKL | 22  | K | 41.8 | 7E-07 |
| Q6XG62 | icn      | Protein S100 (Fragment)                                  | _LTLISK(cr)GELK_            | 32  | 1 | GDKLTLKSGELKELL  | P26447 | S100A4  | Protein S100-A4                                         | 57.5 | 115  | 7E-36  | GDKFKLNKSELKELL | 31  | K | 33.3 | 7E-04 |
| Q6XG62 | icn      | Protein S100                                             | _TTDK(cr)AALDK_             | 53  | 1 | IFGKTTDKAALDKIF  | P26447 | S100A4  | Protein S100-A4                                         | 57.5 | 115  | 7E-36  | -               | -   | - | -    | -     |
| Q6XG62 | icn      | Protein S100                                             | _AALDK(cr)IFK_              | 58  | 1 | TDKAALDKIFKDLDA  | P26447 | S100A4  | Protein S100-A4                                         | 57.5 | 115  | 7E-36  | -               | -   | - | -    | -     |
| F1R8T2 | -        | Protein S100 (Fragment)                                  | _TTDK(cr)ASLDNIFK_          | 53  | 1 | VFGKTTDKASLDNIF  | P26447 | S100A4  | Protein S100-A4                                         | 55.0 | 110  | 4E-33  | -               | -   | - | -    | -     |
| Q1ECX9 | pdia4    | Protein disulfide-isomerase A4                           | _SK(cr)VLEVAK_              | 434 | 1 | ATQFWRSKVLEVAKD  | P13667 | PDIA4   | Protein disulfide-isomerase A4                          | 76.5 | 952  | 0E+00  | ATQFWRSKVLEVAKD | 437 | K | 51.5 | 2E-10 |
| F1QUR3 | -        | Protein disulfide-isomerase A3                           | _YVMK(cr)EEFSR_             | 294 | 1 | KGDKYVMKEEFSRDG  | P30101 | PDIA3   | Protein disulfide-isomerase A3                          | 79.0 | 751  | 0E+00  | KGEKFMQEEFSRDG  | 339 | Q | 42.2 | 5E-07 |
| F1QUR3 | -        | Protein disulfide-isomerase (Fragment)                   | _FAHTNNEDLLK(cr)K_          | 149 | 1 | TNNEDLLKKHGIDGE  | P30101 | PDIA3   | Protein disulfide-isomerase A3                          | 79.0 | 751  | 0E+00  | -               | -   | - | -    | -     |
| B0S564 | -        | Protein disulfide-isomerase                              | _TLDGFTK(cr)FLESGGK_        | 466 | 1 | RTLDFGFTKFLSEGGK | P07237 | P4HB    | Protein disulfide-isomerase                             | 76.0 | 741  | 0E+00  | RTLDFGFKFLSEGGQ | 468 | K | 41.8 | 7E-07 |
| B0S564 | -        | Protein disulfide-isomerase                              | _DFQDK(cr)MDQFK_            | 269 | 1 | AAKDFQDKMDQFKKA  | P07237 | P4HB    | Protein disulfide-isomerase                             | 76.0 | 741  | 0E+00  | -               | -   | - | -    | -     |
| B0S564 | -        | Protein disulfide-isomerase                              | _DVESEDSK(cr)AFIK_          | 168 | 1 | DVESEDSKAFIKTAE  | P07237 | P4HB    | Protein disulfide-isomerase                             | 76.0 | 741  | 0E+00  | -               | -   | - | -    | -     |
| B0S564 | -        | Protein disulfide-isomerase                              | _GNPK(cr)EYSAGR_            | 112 | 1 | GGEKGNPKKEYSAGRQ | P07237 | P4HB    | Protein disulfide-isomerase                             | 76.0 | 741  | 0E+00  | -               | -   | - | -    | -     |

|        |         |                                     |                                 |      |   |                  |        |        |                                                      |      |      |        |                  |      |   |      |       |
|--------|---------|-------------------------------------|---------------------------------|------|---|------------------|--------|--------|------------------------------------------------------|------|------|--------|------------------|------|---|------|-------|
| Q6TGV6 | psma5   | Proteasome subunit alpha type       | _EELEDVIK(cr)DI_                | 239  | 1 | EELEDVIKDI_____  | P28066 | PSMA5  | Proteasome subunit alpha type-5                      | 96.3 | 485  | 9E-178 | EELEEVIKDI_____  | 239  | K | 33.3 | 3E-04 |
| Q7ZV77 | psma4   | Proteasome subunit alpha type       | _TMDVSK(cr)LSAEK_               | 205  | 1 | NKTMVDVSKLSAEKVE | P25789 | PSMA4  | Proteasome subunit alpha type-4                      | 96.2 | 525  | 0E+00  | NKTMVDVSKLSAEKVE | 205  | K | 49.8 | 1E-09 |
| Q7ZV77 | psma4   | Proteasome subunit alpha type       | _QK(cr)EVEELIK_                 | 231  | 1 | KIKVLKQKEVEELIK  | P25789 | PSMA4  | Proteasome subunit alpha type-4                      | 96.2 | 525  | 0E+00  | VIRVLKQKEVEQLIK  | 233  | K | 41.4 | 1E-06 |
| E9QIC9 | lmnb1   | Uncharacterized protein             | _LK(cr)DVEALLNAK_               | 137  | 1 | TSSQNRLKDVEALLN  | P02545 | LMNA   | Prelamin-A/C [Cleaved into: Lamin-A/C                | 58.0 | 171  | 1E-50  | IAAQARLKDLEALLN  | 141  | K | 32   | 2E-03 |
| I3ITD9 | pabpc1b | Uncharacterized protein             | _NLDK(cr)SIDNK_                 | 108  | 1 | IFIKNLDKSIDNKAL  | P11940 | PABPC1 | Polyadenylate-binding protein 1                      | 92.2 | 271  | 7E-90  | IFIKNLDKSIDNKAL  | 108  | K | 50.7 | 5E-10 |
| F1QXV8 | pgk1    | Phosphoglycerate kinase             | _LHLDK(cr)VVDVK_                | 11   | 1 | SNKLHLDKVDVKGKR  | P00558 | PGK1   | Phosphoglycerate kinase 1                            | 88.7 | 759  | 0E+00  | SNKLTLDKLDVKGKR  | 11   | K | 38.8 | 8E-06 |
| E9QF19 | pgk1    | Phosphoglycerate kinase             | _NLLGK(cr)DVQFLK_               | 100  | 1 | ELKNLLGKDVQFLKD  | P00558 | PGK1   | Phosphoglycerate kinase 1                            | 87.8 | 357  | 9E-125 | ELKSLLGKDVLFVKD  | 91   | K | 41.4 | 1E-06 |
| F1QXV8 | pgk1    | Phosphoglycerate kinase             | _ITLPVDFITADK(cr)FDEK_          | 291  | 1 | VDFITADKFDEKATT  | P00558 | PGK1   | Phosphoglycerate kinase 1                            | 88.7 | 759  | 0E+00  | VDFVTADKFDENAKT  | 291  | K | 40.5 | 2E-06 |
| Q6PC53 | ppiab   | Peptidyl-prolyl cis-trans isomerase | _ADVVPK(cr)TAENFR_              | 31   | 1 | LRADVVPKTAENFRA  | P30405 | PPIF   | Peptidyl-prolyl cis-trans isomerase F, mitochondrial | 75.9 | 262  | 2E-91  | LKADVVPKTAENFRA  | 73   | K | 46.4 | 2E-07 |
| Q6PC53 | ppiab   | Peptidyl-prolyl cis-trans isomerase | _FEDENFTLK(cr)HGGK_             | 91   | 1 | EDENFTLKHGGKGTL  | P30405 | PPIF   | Peptidyl-prolyl cis-trans isomerase F, mitochondrial | 75.9 | 262  | 2E-91  | PDENFTLKHVGPVGL  | 135  | K | 32   | 2E-03 |
| B8JKN7 | ppiaa   | Uncharacterized protein             | _HVVFGQVVEGLDVIK(cr)K_          | 80   | 1 | VEGLDVIKVEGFGS   | P30405 | PPIF   | Peptidyl-prolyl cis-trans isomerase F, mitochondrial | 78.8 | 179  | 8E-60  | KEGMDVVKKIESFGS  | 183  | K | 35   | 2E-04 |
| Q6PC53 | ppiab   | Peptidyl-prolyl cis-trans isomerase | _VVDGLDVDAIEK(cr)K_             | 144  | 1 | DVVDIAIEKKGSSSGK | P30405 | PPIF   | Peptidyl-prolyl cis-trans isomerase F, mitochondrial | 75.9 | 262  | 2E-91  | -                | -    | - | -    | -     |
| F6NLI6 | ppib    | Peptidyl-prolyl cis-trans isomerase | _GDGTGGK(cr)SIYGDR_             | 108  | 1 | RGDGTGGKSIYGDRF  | P23284 | PPIB   | Peptidyl-prolyl cis-trans isomerase B                | 82.2 | 357  | 5E-128 | RGDGTGGKSIYGERF  | 116  | K | 46.9 | 1E-08 |
| F6NLI6 | ppib    | Peptidyl-prolyl cis-trans isomerase | _HVVFGK(cr)ILEGMDVVR_           | 163  | 1 | GKHVVFGKILEGMDV  | P23284 | PPIB   | Peptidyl-prolyl cis-trans isomerase B                | 82.2 | 357  | 5E-128 | GKHVVFGKILEGMEV  | 171  | K | 46   | 2E-08 |
| Q6IMW7 | pvalb4  | Parvalbumin 4                       | _FAIIDQDK(cr)SGFIEEELK_         | 55   | 1 | FAIIDQDKSGFIEE   | P20472 | PVALB  | Parvalbumin alpha                                    | 57.0 | 118  | 8E-37  | FHMLDKDKSGFIEED  | 54   | K | 31.6 | 3E-03 |
| Q9I8V0 | pvalb2  | Parvalbumin-2                       | _AFFVIDQDK(cr)SGFIEEDELK_       | 55   | 1 | FFVIDQDKSGFIEE   | P20472 | PVALB  | Parvalbumin alpha                                    | 55.1 | 114  | 2E-35  | FHMLDKDKSGFIEED  | 55   | K | 34.6 | 4E-03 |
| Q9I8V0 | pvalb2  | Parvalbumin-2                       | _AFLSAGSDSDGDK(cr)IGVDEFAL LVK_ | 97   | 1 | GDSGDKGKIGVDEFA  | P20472 | PVALB  | Parvalbumin alpha                                    | 55.1 | 114  | 2E-35  | GDKDGDGKIGVDEFS  | 97   | K | 41.8 | 1E-05 |
| Q804W0 | pvalb1  | Parvalbumin 1                       | _AFLSAGSDSDGDK(cr)IGAEFFAA LVK_ | 97   | 1 | GDSGDKGKIGAEFFA  | P20472 | PVALB  | Parvalbumin alpha                                    | 55.1 | 117  | 3E-36  | GDKDGDGKIGVDEFS  | 97   | K | 35.4 | 2E-03 |
| Q6IMW7 | pvalb4  | Parvalbumin 4                       | _ALTDGETK(cr)TFLK_              | 84   | 1 | ALTDGETKTFLKAGD  | P20472 | PVALB  | Parvalbumin alpha                                    | 57.0 | 118  | 8E-37  | -                | -    | - | -    | -     |
| Q6IMW7 | pvalb4  | Parvalbumin 4                       | _TFLK(cr)AGDSDGDK_              | 88   | 1 | GETKTFLKAGDSDGD  | P20472 | PVALB  | Parvalbumin alpha                                    | 57.0 | 118  | 8E-37  | -                | -    | - | -    | -     |
| Q9I8V0 | pvalb2  | Parvalbumin-2                       | _VGLSAK(cr)SPDDIK_              | 39   | 1 | AKVGLSAKSPDDIK   | P20472 | PVALB  | Parvalbumin alpha                                    | 55.1 | 114  | 2E-35  | -                | -    | - | -    | -     |
| Q9I8V0 | pvalb2  | Parvalbumin-2                       | _ALTDAETK(cr)AFLSAGSDSDGDK_     | 84   | 1 | ALTDAETKAFLSAGD  | P20472 | PVALB  | Parvalbumin alpha                                    | 55.1 | 114  | 2E-35  | -                | -    | - | -    | -     |
| Q9I8V0 | pvalb2  | Parvalbumin-2                       | _IGVDEFALLVK(cr)A_              | 108  | 1 | DEFALLVKA        | P20472 | PVALB  | Parvalbumin alpha                                    | 55.1 | 114  | 2E-35  | -                | -    | - | -    | -     |
| Q9I8V0 | pvalb2  | Parvalbumin-2                       | _K(cr)AFFVIDQDK_                | 46   | 1 | KSPDDIKKAFFVIDQ  | P20472 | PVALB  | Parvalbumin alpha                                    | 55.1 | 114  | 2E-35  | -                | -    | - | -    | -     |
| Q9I8V0 | pvalb2  | Parvalbumin-2                       | _NFFAK(cr)VGLSAK_               | 33   | 1 | NYKNFFAKVGLSAKS  | P20472 | PVALB  | Parvalbumin alpha                                    | 55.1 | 114  | 2E-35  | -                | -    | - | -    | -     |
| Q804W0 | pvalb1  | Parvalbumin 4                       | _SADEVK(cr)K_                   | 45   | 1 | AKSADEVKKAFAIID  | P20472 | PVALB  | Parvalbumin alpha                                    | 55.1 | 117  | 3E-36  | -                | -    | - | -    | -     |
| Q804W0 | pvalb1  | Parvalbumin 1                       | _SFFAK(cr)VGLSAK_               | 33   | 1 | DYKSFFAKVGLSAKS  | P20472 | PVALB  | Parvalbumin alpha                                    | 55.1 | 117  | 3E-36  | -                | -    | - | -    | -     |
| Q804W0 | pvalb1  | Parvalbumin 1                       | _IGAEFFAALVK(cr)A_              | 108  | 1 | EEFAALVKA        | P20472 | PVALB  | Parvalbumin alpha                                    | 55.1 | 117  | 3E-36  | -                | -    | - | -    | -     |
| Q804W0 | pvalb1  | Parvalbumin 1                       | _K(cr)FAIIDQDQNSGFIEEELK_       | 46   | 1 | KSADEVKKAFAIIDQ  | P20472 | PVALB  | Parvalbumin alpha                                    | 55.1 | 117  | 3E-36  | -                | -    | - | -    | -     |
| Q804W0 | pvalb1  | Parvalbumin 1                       | _VLTDK(cr)ETK_                  | 81   | 1 | NARVLTDKETKAFLS  | P20472 | PVALB  | Parvalbumin alpha                                    | 55.1 | 117  | 3E-36  | -                | -    | - | -    | -     |
| Q804W0 | pvalb1  | Parvalbumin 1                       | _ETK(cr)AFLSAGSDSDGDK_          | 84   | 1 | VLTDKETKAFLSAGD  | P20472 | PVALB  | Parvalbumin alpha                                    | 55.1 | 117  | 3E-36  | -                | -    | - | -    | -     |
| Q803X7 | nap11f  | Nap11f protein                      | _NVTLK(cr)TIK_                  | 263  | 1 | KGKNVTLKTIKKKQK  | P55209 | NAP1L1 | Nucleosome assembly protein 1-like 1                 | 83.0 | 541  | 0E+00  | KGKNVTLKTIKKKQK  | 271  | K | 48.6 | 3E-09 |
| F1RB19 | ybx1    | Uncharacterized protein             | _VIATK(cr)VLGTVK_               | 38   | 1 | DKKVIATKVLGTVKW  | P67809 | YBX1   | Nuclease-sensitive element-binding protein 1         | 53.7 | 98.6 | 4E-25  | DKKVIATKVLGTVKW  | 58   | K | 50.3 | 7E-10 |
| A2BGU3 | nono    | Uncharacterized protein             | _ASEIFINK(cr)DR_                | 105  | 1 | ASEIFINKDRGFGFI  | Q15233 | NONO   | Non-POU domain-containing octamer-binding protein    | 66.5 | 355  | 1E-122 | AGEVFIHKDKGFGFI  | 107  | K | 38.8 | 1E-04 |
| F1R1J9 | ahnak   | Uncharacterized protein             | _IPK(cr)TDIDIK_                 | 1275 | 1 | KVKGSKFKIPFSGPT  | Q09666 | AHNAK  | Neuroblast differentiation-associated protein AHNAK  | 46.4 | 4398 | 0E+00  | KVKGSKFKMPFLSIS  | 3404 | K | 33.7 | 5E-04 |

|        |         |                                                   |                                      |      |   |                  |        |       |            |      |      |       |                  |      |   |      |       |
|--------|---------|---------------------------------------------------|--------------------------------------|------|---|------------------|--------|-------|------------|------|------|-------|------------------|------|---|------|-------|
| B0UY61 | neb     | Uncharacterized protein                           | _AAK(cr)EAYK_                        | 5231 | 1 | AHEIRAAKEAYKNIS  | P20929 | NEB   | Nebulin    | 55.2 | 6620 | 0E+00 | -                | -    | - | -    | -     |
| E9QGC9 | myoz1b  | Uncharacterized protein                           | _TPK(cr)DVMLEELSLMK_                 | 51   | 1 | GTKIKTPKDVMLEEL  | Q9NP98 | MYOZ1 | Myozenin-1 | 44.0 | 240  | 6E-24 | GKKISVPRDVMLEEL  | 42   | R | 35   | 2E-04 |
| F1QJK4 | myh9b   | Uncharacterized protein                           | _AEMEDLVSSK(cr)DDVGK_                | 1512 | 1 | MEDLVSSKDDVGKSV  | P35579 | MYH9  | Myosin-9   | 83.0 | 2808 | 0E+00 | MEDLMSSKDDVGKSV  | 1513 | K | 46   | 3E-07 |
| B8A561 | myhz1.2 | Uncharacterized protein                           | _AVETEK(cr)AEIQTALAEAGTLEH EESK_     | 1539 | 1 | KKAVETEKAEIQTAL  | A7E2Y1 | MYH7B | Myosin-7B  | 67.0 | 2492 | 0E+00 | KKALEGEKSEIQAAL  | 1544 | K | 33.3 | 7E-04 |
| F1QIR4 | -       | Uncharacterized protein                           | _LK(cr)EAYAK_                        | 863  | 1 | KEEFTLKAEYAKSE   | P12883 | MYH7  | Myosin-7   | 85.0 | 3349 | 0E+00 | KEEFTRLKEALEKSE  | 860  | K | 36.7 | 4E-05 |
| B8A561 | myhz1.2 | Uncharacterized protein                           | _SSVK(cr)LLATLYPPVVEETGGGK           | 619  | 1 | LYQSSVKLLATLYP   | P13533 | MYH6  | Myosin-6   | 77.0 | 3033 | 0E+00 | LYQSSVKLLMATLFS  | 616  | K | 36.7 | 4E-05 |
| B8A568 | myhz1.1 | Uncharacterized protein                           | _SSVK(cr)LLATLYPPVVEETGGGK           | 619  | 1 | LYQSSVKLLATLYP   | P13533 | MYH6  | Myosin-6   | 77.0 | 3031 | 0E+00 | LYQSSVKLLMATLFS  | 616  | K | 36.7 | 4E-05 |
| F1QIR4 | -       | Uncharacterized protein                           | _TINDFTMQK(cr)AK_                    | 1280 | 1 | INDFTMQKAKLQTEN  | P13533 | MYH6  | Myosin-6   | 85.0 | 3315 | 0E+00 | LNDFTTQRAKLQTEN  | 1280 | R | 40.1 | 3E-06 |
| F1QIR4 | -       | Uncharacterized protein                           | _AQLEFNQVK(cr)ADIER_                 | 1572 | 1 | QLEFNQVKADIERKL  | P13533 | MYH6  | Myosin-6   | 85.0 | 3315 | 0E+00 | QLEFNQIKAEIERKL  | 1571 | K | 46.9 | 1E-08 |
| F1QIR4 | -       | Uncharacterized protein                           | _K(cr)LSEKDEEMEQA_                   | 1578 | 1 | VKADIERKLSEKDEE  | P13533 | MYH6  | Myosin-6   | 85.0 | 8594 | 0E+00 | IKAEIERKLAEKDEE  | 1577 | K | 43.1 | 2E-07 |
| F1QIR4 | -       | Uncharacterized protein                           | _KLSEK(cr)DEEM(ox)EQAK_              | 1582 | 1 | IERKLSEKDEEMEQA  | P13533 | MYH6  | Myosin-6   | 85.0 | 3315 | 0E+00 | IERKLAEKDEEMEQA  | 1581 | K | 49.8 | 1E-09 |
| F1QIR4 | -       | Uncharacterized protein                           | _KLSEK(cr)DEEMEQA_                   | 1582 | 1 | IERKLSEKDEEMEQA  | P13533 | MYH6  | Myosin-6   | 85.0 | 3315 | 0E+00 | IERKLAEKDEEMEQA  | 1581 | K | 49.8 | 1E-09 |
| Q6IQX1 | myhz2   | Myosin, heavy polypeptide 2, fast muscle specific | _LAEKDEEMEQAQIK(cr)R_                | 1589 | 1 | DEEMEQAQRNSQRVT  | P13533 | MYH6  | Myosin-6   | 77.0 | 3039 | 0E+00 | DEEMEQAQRNHQRVV  | 1589 | K | 39.7 | 4E-06 |
| B8A561 | myhz1.2 | Uncharacterized protein                           | _QSEEAEEQANSHLSK(cr)LR_              | 1897 | 1 | QANSHLSKLRKVQHE  | P13533 | MYH6  | Myosin-6   | 77.0 | 3033 | 0E+00 | QANTNLSKFRKVQHE  | 1897 | K | 39.7 | 4E-06 |
| B8A568 | myhz1.1 | Uncharacterized protein                           | _QSEEAEEQANSHLSK(cr)LR_              | 1897 | 1 | QANSHLSKLRKVQHE  | P13533 | MYH6  | Myosin-6   | 77.0 | 3031 | 0E+00 | QANTNLSKFRKVQHE  | 1897 | K | 39.7 | 4E-06 |
| E7FAD0 | myhz1.1 | Uncharacterized protein                           | _ELEEK(cr)MVSLLEQK_                  | 878  | 1 | KKKELEEKMVSLLEQ  | Q9Y623 | MYH4  | Myosin-4   | 83.4 | 3249 | 0E+00 | KRKELEEKMVTLMQE  | 880  | K | 43.1 | 2E-07 |
| B8A561 | myhz1.2 | Uncharacterized protein                           | _ANALANLDK(cr)K_                     | 1446 | 1 | ALANLDKQQRNFDK   | P11055 | MYH3  | Myosin-3   | 80.0 | 3081 | 0E+00 | SLAALDKKQRNFDK   | 1447 | K | 42.2 | 5E-07 |
| B8A568 | myhz1.1 | Uncharacterized protein                           | _ANALANLDK(cr)K_                     | 1446 | 1 | ALANLDKQQRNFDK   | P11055 | MYH3  | Myosin-3   | 80.0 | 3081 | 0E+00 | SLAALDKKQRNFDK   | 1447 | K | 42.2 | 5E-07 |
| B8A561 | myhz1.2 | Uncharacterized protein                           | _QAEEAQK(cr)QLR_                     | 1643 | 1 | RQAEEAQKQLRNVQA  | P11055 | MYH3  | Myosin-3   | 80.0 | 3081 | 0E+00 | RQAAETLKHLSVQVG  | 1642 | K | 32   | 2E-03 |
| B8A568 | myhz1.1 | Uncharacterized protein                           | _QAEEAQK(cr)QLR_                     | 1643 | 1 | RQAEEAQKQLRNVQA  | P11055 | MYH3  | Myosin-3   | 80.0 | 3081 | 0E+00 | RQAAETLKHLSVQVG  | 1642 | K | 32   | 2E-03 |
| F1QIR4 | -       | Uncharacterized protein                           | _IK(cr)ELTYQTEEDRK_                  | 1851 | 1 | RKYERRIKELTYQTE  | P11055 | MYH3  | Myosin-3   | 78.0 | 2991 | 0E+00 | RKYERRVKELTYQSE  | 1849 | K | 48.1 | 4E-09 |
| B8A561 | myhz1.2 | Uncharacterized protein                           | _DFETSQLLSK(cr)IEDEQSLGAQL QK_       | 1095 | 1 | ETSQLLSKIEDEQSL  | Q9UKX2 | MYH2  | Myosin-2   | 82.0 | 3197 | 0E+00 | EISNLQSKIEDEQAL  | 1099 | K | 33.3 | 7E-04 |
| B8A568 | myhz1.1 | Uncharacterized protein                           | _DFETSQLLSK(cr)IEDEQSLGAQL QK_       | 1095 | 1 | ETSQLLSKIEDEQSL  | Q9UKX2 | MYH2  | Myosin-2   | 82.0 | 3197 | 0E+00 | EISNLQSKIEDEQAL  | 1099 | K | 33.3 | 7E-04 |
| X1WF87 | myhb    | Uncharacterized protein                           | _TEEEEAQK(cr)K_                      | 1392 | 1 | TEEEEAQKKLAQRL   | Q9UKX2 | MYH2  | Myosin-2   | 82.4 | 3242 | 0E+00 | TEEEEAQKKLAQRL   | 1396 | K | 49.4 | 1E-09 |
| F1QIR4 | -       | Uncharacterized protein                           | _TEEEEAQK(cr)K_                      | 1393 | 1 | TEEEEAQKKLAQRL   | Q9UKX2 | MYH2  | Myosin-2   | 79.0 | 3103 | 0E+00 | TEEEEAQKKLAQRL   | 1396 | K | 46.9 | 1E-08 |
| F1QIR4 | -       | Uncharacterized protein                           | _NSYEEVLDQLETMK(cr)R_                | 1502 | 1 | LDQLETMKRENKNLQ  | Q9UKX2 | MYH2  | Myosin-2   | 79.0 | 3103 | 0E+00 | LDQLETMKRENKNLQ  | 1505 | K | 48.6 | 3E-09 |
| F1QIR4 | -       | Uncharacterized protein                           | _K(cr)QLEQEK_                        | 1534 | 1 | HELEKIRKQLEQEK   | Q9UKX2 | MYH2  | Myosin-2   | 79.0 | 3103 | 0E+00 | HELEKIRKQVEQEK   | 1537 | K | 41.8 | 7E-07 |
| Q6IQX1 | myhz2   | Myosin, heavy polypeptide 2, fast muscle specific | _KK(cr)DFETAQLLSK_                   | 1085 | 1 | SEEKIKKDFETAQL   | Q9UKX3 | MYH13 | Myosin-13  | 79.0 | 3106 | 0E+00 | IEEKIKKDFELSQL   | 1089 | K | 32.9 | 1E-03 |
| Q6IQX1 | myhz2   | Myosin, heavy polypeptide 2, fast muscle specific | _EDDVHPPM(ox)NPPK(cr)FDK_            | 85   | 1 | VHPMPPKFDKIEDM   | P12882 | MYH1  | Myosin-1   | 82.1 | 3210 | 0E+00 | VFPMPNPPKYDKIEDM | 84   | K | 46.9 | 1E-08 |
| B8A561 | myhz1.2 | Uncharacterized protein                           | _M(ox)QGSLEDQIIANPLLEAYGN AK(cr)TVR_ | 238  | 1 | LEAYGNAKTVRNDNS  | P12882 | MYH1  | Myosin-1   | 82.1 | 3207 | 0E+00 | LEAFGNAKTVRNDNS  | 237  | K | 46.4 | 2E-08 |
| B8A568 | myhz1.1 | Uncharacterized protein                           | _GQTVPPQVYNSVSALSALSK(cr)SIYER       | 433  | 1 | NSVSALSALSIYERMF | P12882 | MYH1  | Myosin-1   | 82.1 | 3208 | 0E+00 | NAVAGALAKAVYDKMF | 432  | K | 31.6 | 3E-03 |

|        |         |                                    |                             |     |   |                 |        |      |          |      |      |       |                  |     |   |      |       |
|--------|---------|------------------------------------|-----------------------------|-----|---|-----------------|--------|------|----------|------|------|-------|------------------|-----|---|------|-------|
| B8A561 | myhz1.2 | Uncharacterized protein            | _ENLGK(cr)LM(ox)TNLR_       | 659 | 1 | QFRENLGKLMTNLRS | P12882 | MYH1 | Myosin-1 | 82.1 | 3207 | 0E+00 | LFRENLNKLMTNLRS  | 663 | K | 44.8 | 6E-08 |
| B8A561 | myhz1.2 | Uncharacterized protein            | _ENLGK(cr)LMTNLR_           | 659 | 1 | QFRENLGKLMTNLRS | P12882 | MYH1 | Myosin-1 | 82.1 | 3207 | 0E+00 | LFRENLNKLMTNLRS  | 663 | K | 44.8 | 6E-08 |
| B8A568 | myhz1.1 | Uncharacterized protein            | _ENLGK(cr)LMTNLR_           | 659 | 1 | QFRENLGKLMTNLRS | P12882 | MYH1 | Myosin-1 | 82.1 | 3208 | 0E+00 | LFRENLNKLMTNLRS  | 663 | K | 44.8 | 6E-08 |
| B8A561 | myhz1.2 | Uncharacterized protein            | _VLNASVIPEGQFIDNK(cr)K_     | 741 | 1 | EQQFIDNKKASEKLL | P12882 | MYH1 | Myosin-1 | 82.1 | 3207 | 0E+00 | EQQFIDSKKASEKLL  | 743 | K | 46.4 | 2E-08 |
| B8A561 | myhz1.2 | Uncharacterized protein            | _FGHTK(cr)VFFK_             | 764 | 1 | EYRFGHTKVFFKAGL | P12882 | MYH1 | Myosin-1 | 82.1 | 3207 | 0E+00 | QYKFGHTKVFFKAGL  | 766 | K | 45.6 | 3E-08 |
| B8A568 | myhz1.1 | Uncharacterized protein            | _FGHTK(cr)VFFK_             | 764 | 1 | EYRFGHTKVFFKAGL | P12882 | MYH1 | Myosin-1 | 82.1 | 3208 | 0E+00 | QYKFGHTKVFFKAGL  | 766 | K | 45.6 | 3E-08 |
| B8A561 | myhz1.2 | Uncharacterized protein            | _SAETEK(cr)ELATM(ox)K_      | 849 | 1 | LKSAETEKELATMKE | P12882 | MYH1 | Myosin-1 | 82.1 | 3207 | 0E+00 | LKSAETEKEMANMKE  | 851 | K | 43.5 | 2E-07 |
| B8A561 | myhz1.2 | Uncharacterized protein            | _SAETEK(cr)ELATMK_          | 849 | 1 | LKSAETEKELATMKE | P12882 | MYH1 | Myosin-1 | 82.1 | 3207 | 0E+00 | LKSAETEKEMANMKE  | 851 | K | 43.5 | 2E-07 |
| B8A568 | myhz1.1 | Uncharacterized protein            | _SAETEK(cr)ELATMK_          | 849 | 1 | LKSAETEKELATMKE | P12882 | MYH1 | Myosin-1 | 82.1 | 3208 | 0E+00 | LKSAETEKEMANMKE  | 851 | K | 43.5 | 2E-07 |
| B8A561 | myhz1.2 | Uncharacterized protein            | _ELATMK(cr)EDFVK_           | 855 | 1 | EKELATMKEDFVKCK | P12882 | MYH1 | Myosin-1 | 82.1 | 3207 | 0E+00 | EKEMANMKEEFKTK   | 857 | K | 31.2 | 4E-03 |
| B8A568 | myhz1.1 | Uncharacterized protein            | _ELATMK(cr)EDFVK_           | 855 | 1 | EKELATMKEDFVKCK | P12882 | MYH1 | Myosin-1 | 82.1 | 3208 | 0E+00 | EKEMANMKEEFKTK   | 857 | K | 31.2 | 4E-03 |
| B8A568 | myhz1.1 | Uncharacterized protein            | _EDFVK(cr)CK_               | 860 | 1 | TMKEDFVKCKEDLAK | P12882 | MYH1 | Myosin-1 | 82.1 | 3208 | 0E+00 | NMKEEFKTKKEELAK  | 864 | K | 31.6 | 3E-03 |
| B8A569 | myhz1.3 | Uncharacterized protein            | _EALAK(cr)AEAK_             | 867 | 1 | KCKEALAKAEAKKKE | P12882 | MYH1 | Myosin-1 | 82.1 | 3211 | 0E+00 | KTKKEELAKTEAKRKE | 873 | K | 32   | 2E-03 |
| B8A561 | myhz1.2 | Uncharacterized protein            | _EDLAK(cr)AEAK_             | 867 | 1 | KCKEDLAKAEAKKKE | P12882 | MYH1 | Myosin-1 | 82.1 | 3207 | 0E+00 | KTKKEELAKTEAKRKE | 873 | K | 33.7 | 5E-04 |
| B8A568 | myhz1.1 | Uncharacterized protein            | _EDLAK(cr)AEAK_             | 867 | 1 | KCKEDLAKAEAKKKE | P12882 | MYH1 | Myosin-1 | 82.1 | 3208 | 0E+00 | KTKKEELAKTEAKRKE | 873 | K | 33.7 | 5E-04 |
| B8A561 | myhz1.2 | Uncharacterized protein            | _KK(cr)ELEEK_               | 873 | 1 | AKAEAKKKELEEKMV | P12882 | MYH1 | Myosin-1 | 82.1 | 3207 | 0E+00 | AKTEAKRKELEEKMV  | 875 | K | 43.9 | 1E-07 |
| B8A568 | myhz1.1 | Uncharacterized protein            | _KK(cr)ELEEK_               | 873 | 1 | AKAEAKKKELEEKMV | P12882 | MYH1 | Myosin-1 | 82.1 | 3208 | 0E+00 | AKTEAKRKELEEKMV  | 875 | K | 43.9 | 1E-07 |
| B8A561 | myhz1.2 | Uncharacterized protein            | _ELEEK(cr)MVALLQEK_         | 878 | 1 | KKKELEEKMVALLQE | P12882 | MYH1 | Myosin-1 | 82.1 | 3207 | 0E+00 | KRKELEEKMVTLMQE  | 880 | K | 42.6 | 3E-07 |
| B8A568 | myhz1.1 | Uncharacterized protein            | _ELEEK(cr)MVALLQEK_         | 878 | 1 | KKKELEEKMVALLQE | P12882 | MYH1 | Myosin-1 | 82.1 | 3208 | 0E+00 | KRKELEEKMVTLMQE  | 880 | K | 42.6 | 3E-07 |
| B8A568 | myhz1.1 | Uncharacterized protein            | _LK(cr)ETTERLEDEEIIAELTAK_  | 922 | 1 | IQLEAKLKETTERLE | P12882 | MYH1 | Myosin-1 | 82.1 | 3208 | 0E+00 | IQLEAKIKEVTERAE  | 924 | K | 37.1 | 3E-05 |
| B8A561 | myhz1.2 | Uncharacterized protein            | _LEDEEIIAELTAK(cr)K_        | 941 | 1 | INAELTAKKRKLEDE | P12882 | MYH1 | Myosin-1 | 82.1 | 3207 | 0E+00 | INAELTAKKRKLEDE  | 943 | K | 49.8 | 1E-09 |
| B8A568 | myhz1.1 | Uncharacterized protein            | _LEDEEIIAELTAK(cr)K_        | 941 | 1 | INAELTAKKRKLEDE | P12882 | MYH1 | Myosin-1 | 82.1 | 3208 | 0E+00 | INAELTAKKRKLEDE  | 943 | K | 49.8 | 1E-09 |
| B8A561 | myhz1.2 | Uncharacterized protein            | _HATENK(cr)VK_              | 976 | 1 | EKHATENKVKNLTEE | P12882 | MYH1 | Myosin-1 | 82.1 | 3207 | 0E+00 | EKHATENKVKNLTEE  | 978 | K | 50.7 | 5E-10 |
| B8A568 | myhz1.1 | Uncharacterized protein            | _HATENK(cr)VK_              | 976 | 1 | EKHATENKVKNLTEE | P12882 | MYH1 | Myosin-1 | 82.1 | 3208 | 0E+00 | EKHATENKVKNLTEE  | 978 | K | 50.7 | 5E-10 |
| Q6IQX1 | myhz2   | Uncharacterized protein            | _VK(cr)NLTEEM(ox)ASQDESIK_  | 978 | 1 | HATENKVKNLTEEMA | P12882 | MYH1 | Myosin-1 | 82.1 | 3210 | 0E+00 | HATENKVKNLTEEMA  | 980 | K | 51.5 | 2E-10 |
| Q6IQX1 | myhz2   | Uncharacterized protein (Fragment) | _VK(cr)NLTEEMASQDESIK_      | 978 | 1 | HATENKVKNLTEEMA | P12882 | MYH1 | Myosin-1 | 82.1 | 3210 | 0E+00 | HATENKVKNLTEEMA  | 980 | K | 51.5 | 2E-10 |
| B8A561 | myhz1.2 | Uncharacterized protein            | _VK(cr)NLTEEMAAQDESIGK_     | 978 | 1 | HATENKVKNLTEEMA | P12882 | MYH1 | Myosin-1 | 82.1 | 3207 | 0E+00 | HATENKVKNLTEEMA  | 980 | K | 51.5 | 2E-10 |
| B8A568 | myhz1.1 | Uncharacterized protein            | _VK(cr)NLTEEMAAQDESIGK_     | 978 | 1 | HATENKVKNLTEEMA | P12882 | MYH1 | Myosin-1 | 82.1 | 3208 | 0E+00 | HATENKVKNLTEEMA  | 980 | K | 51.5 | 2E-10 |
| A2BGX6 | myhc4   | Uncharacterized protein            | _VK(cr)NLTEEMASQDESIK_      | 978 | 1 | HATENKVKNLTEEMA | P12882 | MYH1 | Myosin-1 | 82.1 | 3208 | 0E+00 | HATENKVKNLTEEMA  | 980 | K | 51.5 | 2E-10 |
| Q6IQX1 | myhz2   | Uncharacterized protein (Fragment) | _NLTEEMASQDESIK(cr)LTK_     | 993 | 1 | SQDESIAKLTKEKKA | P12882 | MYH1 | Myosin-1 | 82.1 | 3210 | 0E+00 | GLDETIAKLTKEKKA  | 999 | K | 39.7 | 4E-06 |
| B8A561 | myhz1.2 | Uncharacterized protein            | _NLTEEMAAQDESIGK(cr)LTK_    | 993 | 1 | AQDESIGKLTKEKKA | P12882 | MYH1 | Myosin-1 | 82.1 | 3207 | 0E+00 | GLDETIAKLTKEKKA  | 999 | K | 36.3 | 6E-05 |
| B8A568 | myhz1.1 | Uncharacterized protein            | _NLTEEMAAQDESIGK(cr)LTK_    | 993 | 1 | AQDESIGKLTKEKKA | P12882 | MYH1 | Myosin-1 | 82.1 | 3208 | 0E+00 | GLDETIAKLTKEKKA  | 999 | K | 36.3 | 6E-05 |
| A2BGX6 | myhc4   | Uncharacterized protein            | _NLTEEM(ox)ASQDESIK(cr)LTK_ | 993 | 1 | SQDESIAKLTKEKKA | P12882 | MYH1 | Myosin-1 | 82.1 | 3208 | 0E+00 | GLDETIAKLTKEKKA  | 999 | K | 39.7 | 4E-06 |

|        |         |                                                   |                                  |      |   |                 |        |      |          |      |      |       |                 |      |   |      |       |
|--------|---------|---------------------------------------------------|----------------------------------|------|---|-----------------|--------|------|----------|------|------|-------|-----------------|------|---|------|-------|
| B8A561 | myhz1.2 | Uncharacterized protein                           | _ALQEAHQQTLLDQLAEEDK(cr)VNTLTK_  | 1018 | 1 | DLQAEEDKVNLTLS  | P12882 | MYH1 | Myosin-1 | 82.1 | 3207 | 0E+00 | DLQAEEDKVNLTLS  | 1020 | K | 46.9 | 2E-07 |
| B8A568 | myhz1.1 | Uncharacterized protein                           | _ALQEAHQQTLLDQLAEEDK(cr)VNTLTK_  | 1018 | 1 | DLQAEEDKVNLTLS  | P12882 | MYH1 | Myosin-1 | 82.1 | 3208 | 0E+00 | DLQAEEDKVNLTLS  | 1020 | K | 46.9 | 2E-07 |
| B8A561 | myhz1.2 | Uncharacterized protein                           | _ALQEAHQQTLLDQLAEEDKVNLTk(cr)SK_ | 1024 | 1 | DKVNLTLSKTKLEQ  | P12882 | MYH1 | Myosin-1 | 82.1 | 3207 | 0E+00 | DKVNLTLSKTKLEQ  | 1026 | K | 42.6 | 5E-06 |
| B8A568 | myhz1.1 | Uncharacterized protein                           | _ALQEAHQQTLLDQLAEEDKVNLTk(cr)SK_ | 1024 | 1 | DKVNLTLSKTKLEQ  | P12882 | MYH1 | Myosin-1 | 82.1 | 3208 | 0E+00 | DKVNLTLSKTKLEQ  | 1026 | K | 42.6 | 5E-06 |
| B8A561 | myhz1.2 | Uncharacterized protein                           | _LEQQVDDLEGSLEQEK(cr)K_          | 1044 | 1 | EGSLEQEKKLRMDLE | P12882 | MYH1 | Myosin-1 | 82.1 | 3207 | 0E+00 | EGSLEQEKKLRMDLE | 1046 | K | 48.1 | 4E-09 |
| B8A568 | myhz1.1 | Uncharacterized protein                           | _LEQQVDDLEGSLEQEK(cr)K_          | 1044 | 1 | EGSLEQEKKLRMDLE | P12882 | MYH1 | Myosin-1 | 82.1 | 3208 | 0E+00 | EGSLEQEKKLRMDLE | 1046 | K | 48.1 | 4E-09 |
| B8A561 | myhz1.2 | Uncharacterized protein                           | _LAQESIMDLENDK(cr)QQSEEK_        | 1075 | 1 | IMDLENDKQQSEEK  | P12882 | MYH1 | Myosin-1 | 82.1 | 3207 | 0E+00 | IMDLENDKQQIEEK  | 1077 | K | 47.3 | 8E-09 |
| B8A568 | myhz1.1 | Uncharacterized protein                           | _LAQESIMDLENDK(cr)QQSEEK_        | 1075 | 1 | IMDLENDKQQSEEK  | P12882 | MYH1 | Myosin-1 | 82.1 | 3208 | 0E+00 | IMDLENDKQQIEEK  | 1077 | K | 47.3 | 8E-09 |
| B8A561 | myhz1.2 | Uncharacterized protein                           | _K(cr)DFETSQLLSK_                | 1085 | 1 | SEEKLRKDFETSQ   | P12882 | MYH1 | Myosin-1 | 82.1 | 3207 | 0E+00 | LDEKLRKDFETSQ   | 1089 | K | 31.2 | 4E-03 |
| B8A568 | myhz1.1 | Uncharacterized protein                           | _K(cr)DFETSQLLSK_                | 1085 | 1 | SEEKLRKDFETSQ   | P12882 | MYH1 | Myosin-1 | 82.1 | 3208 | 0E+00 | LDEKLRKDFETSQ   | 1089 | K | 31.2 | 4E-03 |
| Q6IQX1 | myhz2   | Myosin, heavy polypeptide 2, fast muscle specific | _IEDEQSLGAQLQK(cr)K_             | 1108 | 1 | SLGAQLQKKIKELQA | P12882 | MYH1 | Myosin-1 | 82.1 | 3210 | 0E+00 | ALGMQLQKKIKELQA | 1111 | K | 40.9 | 1E-06 |
| B8A561 | myhz1.2 | Uncharacterized protein                           | _IEDEQSLGAQLQK(cr)K_             | 1108 | 1 | SLGAQLQKKIKELQA | P12882 | MYH1 | Myosin-1 | 82.1 | 3207 | 0E+00 | ALGMQLQKKIKELQA | 1112 | K | 40.9 | 1E-06 |
| B8A561 | myhz1.2 | Uncharacterized protein                           | _LEEAGGATAAQIEMNK(cr)K_          | 1167 | 1 | AAQIEMNKKREAEFQ | P12882 | MYH1 | Myosin-1 | 82.1 | 3207 | 0E+00 | SAQIEMNKKREAEFQ | 1171 | K | 49.8 | 1E-09 |
| B8A568 | myhz1.1 | Uncharacterized protein                           | _LEEAGGATAAQIEMNK(cr)K_          | 1167 | 1 | AAQIEMNKKREAEFQ | P12882 | MYH1 | Myosin-1 | 82.1 | 3208 | 0E+00 | SAQIEMNKKREAEFQ | 1171 | K | 49.8 | 1E-09 |
| B8A561 | myhz1.2 | Uncharacterized protein                           | _K(cr)QADSVAEELGEQIDNLQR_        | 1197 | 1 | TAAALRKKQADSVAE | P12882 | MYH1 | Myosin-1 | 82.1 | 3207 | 0E+00 | TAATLRKKHADSVAE | 1199 | K | 40.9 | 1E-06 |
| B8A568 | myhz1.1 | Uncharacterized protein                           | _K(cr)QADSVAEELGEQIDNLQR_        | 1197 | 1 | TAAALRKKQADSVAE | P12882 | MYH1 | Myosin-1 | 82.1 | 3208 | 0E+00 | TAATLRKKHADSVAE | 1199 | K | 40.9 | 1E-06 |
| B8A561 | myhz1.2 | Uncharacterized protein                           | _SEYK(cr)MEIDDLSSNMEAVAK_        | 1227 | 1 | EKEKSEYKMEIDDL  | P12882 | MYH1 | Myosin-1 | 82.1 | 3207 | 0E+00 | EKEKSEMMEIDDLA  | 1229 | K | 41.4 | 1E-06 |
| B8A568 | myhz1.1 | Uncharacterized protein                           | _SEYK(cr)MEIDDLSSNMEAVAK_        | 1227 | 1 | EKEKSEYKMEIDDL  | P12882 | MYH1 | Myosin-1 | 82.1 | 3208 | 0E+00 | EKEKSEMMEIDDLA  | 1229 | K | 41.4 | 1E-06 |
| B8A561 | myhz1.2 | Uncharacterized protein                           | _M(ox)EIDDLSSNM(ox)EAVAK(cr)AK_  | 1242 | 1 | SNMEAVAKAKANLEK | P12882 | MYH1 | Myosin-1 | 82.1 | 3207 | 0E+00 | SNMETVSKAKGNLEK | 1244 | K | 40.1 | 3E-06 |
| B8A561 | myhz1.2 | Uncharacterized protein                           | _MEIDDLSSNM(ox)EAVAK(cr)AK_      | 1242 | 1 | SNMEAVAKAKANLEK | P12882 | MYH1 | Myosin-1 | 82.1 | 3207 | 0E+00 | SNMETVSKAKGNLEK | 1244 | K | 40.1 | 3E-06 |
| B8A568 | myhz1.1 | Uncharacterized protein                           | _MEIDDLSSNM(ox)EAVAK(cr)AK_      | 1242 | 1 | SNMEAVAKAKANLEK | P12882 | MYH1 | Myosin-1 | 82.1 | 3208 | 0E+00 | SNMETVSKAKGNLEK | 1244 | K | 40.1 | 3E-06 |
| B8A561 | myhz1.2 | Uncharacterized protein                           | _AK(cr)ANLEK_                    | 1244 | 1 | MEAVAKAKANLEKMC | P12882 | MYH1 | Myosin-1 | 82.1 | 3207 | 0E+00 | METVSKAKGNLEKMC | 1246 | K | 43.1 | 4E-06 |
| B8A568 | myhz1.1 | Uncharacterized protein                           | _AK(cr)ANLEK_                    | 1244 | 1 | MEAVAKAKANLEKMC | P12882 | MYH1 | Myosin-1 | 82.1 | 3208 | 0E+00 | METVSKAKGNLEKMC | 1246 | K | 43.1 | 4E-06 |
| Q6IQX1 | myhz2   | Myosin, heavy polypeptide 2, fast muscle specific | _TVEDQLSEIK(cr)SK_               | 1262 | 1 | EDQLSEIKSKNDENL | P12882 | MYH1 | Myosin-1 | 82.1 | 3210 | 0E+00 | EDQLSEIKTKEEEEQ | 1264 | K | 35   | 2E-04 |
| B8A561 | myhz1.2 | Uncharacterized protein                           | _TVEDQLSEIK(cr)SK_               | 1262 | 1 | EDQLSEIKSKNDENL | P12882 | MYH1 | Myosin-1 | 82.1 | 3207 | 0E+00 | EDQLSEIKTKEEEEQ | 1264 | K | 35   | 2E-04 |
| B8A568 | myhz1.1 | Uncharacterized protein                           | _TVEDQLSEIK(cr)SK_               | 1262 | 1 | EDQLSEIKSKNDENL | P12882 | MYH1 | Myosin-1 | 82.1 | 3208 | 0E+00 | EDQLSEIKTKEEEEQ | 1264 | K | 35   | 2E-04 |
| B8A561 | myhz1.2 | Uncharacterized protein                           | _QLEEK(cr)EALVSQLTR_             | 1296 | 1 | FGRQLEEKALVSQL  | P12882 | MYH1 | Myosin-1 | 82.1 | 3207 | 0E+00 | YSRQLDEKDTLVSQL | 1302 | K | 35.4 | 1E-04 |
| B8A561 | myhz1.2 | Uncharacterized protein                           | _QAFTQQIEELK(cr)R_               | 1318 | 1 | TQQIEELKRQIEEEV | P12882 | MYH1 | Myosin-1 | 82.1 | 3207 | 0E+00 | TQQIEELKRQLEEEI | 1320 | K | 46.4 | 2E-08 |
| B8A568 | myhz1.1 | Uncharacterized protein                           | _QAFTQQIEELK(cr)R_               | 1318 | 1 | TQQIEELKRQIEEEV | P12882 | MYH1 | Myosin-1 | 82.1 | 3208 | 0E+00 | TQQIEELKRQLEEEI | 1320 | K | 46.4 | 2E-08 |
| B8A561 | myhz1.2 | Uncharacterized protein                           | _TEELESK(cr)K_                   | 1392 | 1 | TEELESKSKLAQRL  | P12882 | MYH1 | Myosin-1 | 82.1 | 3207 | 0E+00 | TEELEEAKKLAQRL  | 1394 | K | 46.9 | 1E-08 |
| B8A568 | myhz1.1 | Uncharacterized protein                           | _TEELESK(cr)K_                   | 1392 | 1 | TEELESKSKLAQRL  | P12882 | MYH1 | Myosin-1 | 82.1 | 3208 | 0E+00 | TEELEEAKKLAQRL  | 1394 | K | 46.9 | 1E-08 |
| B8A561 | myhz1.2 | Uncharacterized protein                           | _CASLEK(cr)TK_                   | 1418 | 1 | SKCASLEKTKQRLQG | P12882 | MYH1 | Myosin-1 | 82.1 | 3207 | 0E+00 | AKCASLEKTKQRLQN | 1422 | K | 43.9 | 1E-07 |

|        |         |                                                   |                              |      |   |                  |        |      |          |      |      |       |                  |      |   |      |       |
|--------|---------|---------------------------------------------------|------------------------------|------|---|------------------|--------|------|----------|------|------|-------|------------------|------|---|------|-------|
| B8A568 | myhz1.1 | Uncharacterized protein                           | _CASLEK(cr)TK_               | 1418 | 1 | SKCASLEKTKQRLQG  | P12882 | MYH1 | Myosin-1 | 82.1 | 3208 | 0E+00 | AKCASLEKTKQRLQN  | 1422 | K | 43.9 | 1E-07 |
| B8A561 | myhz1.2 | Uncharacterized protein                           | _NFDK(cr)VLAEWK_             | 1453 | 1 | KKQRNFDKVLAEWKQ  | P12882 | MYH1 | Myosin-1 | 82.1 | 3207 | 0E+00 | KKQRNFDKILAEWKQ  | 1455 | K | 51.5 | 3E-10 |
| B8A568 | myhz1.1 | Uncharacterized protein                           | _NFDK(cr)VLAEWK_             | 1453 | 1 | KKQRNFDKVLAEWKQ  | P12882 | MYH1 | Myosin-1 | 82.1 | 3208 | 0E+00 | KKQRNFDKILAEWKQ  | 1455 | K | 51.5 | 3E-10 |
| B8A561 | myhz1.2 | Uncharacterized protein                           | _QK(cr)YEEGQAELEGAQK_        | 1461 | 1 | VLAEWKQKYEEGQAE  | P12882 | MYH1 | Myosin-1 | 82.1 | 3207 | 0E+00 | ILAEWKQKCEETHAE  | 1463 | K | 36.7 | 4E-05 |
| B8A568 | myhz1.1 | Uncharacterized protein                           | _QK(cr)YEEGQAELEGAQK_        | 1461 | 1 | VLAEWKQKYEEGQAE  | P12882 | MYH1 | Myosin-1 | 82.1 | 3208 | 0E+00 | ILAEWKQKCEETHAE  | 1463 | K | 36.7 | 4E-05 |
| B8A561 | myhz1.2 | Uncharacterized protein                           | _YEEGQAELEGAQK(cr)EAR_       | 1474 | 1 | AELEGAQKEARSLST  | P12882 | MYH1 | Myosin-1 | 82.1 | 3207 | 0E+00 | AELEASQKESRSLST  | 1476 | K | 38.8 | 8E-06 |
| B8A568 | myhz1.1 | Uncharacterized protein                           | _YEEGQAELEGAQK(cr)EAR_       | 1474 | 1 | AELEGAQKEARSLST  | P12882 | MYH1 | Myosin-1 | 82.1 | 3208 | 0E+00 | AELEASQKESRSLST  | 1476 | K | 38.8 | 8E-06 |
| B8A561 | myhz1.2 | Uncharacterized protein                           | _M(ox)K(cr)NSYEETLDQLETLK_   | 1487 | 1 | STELFKMKNSYEETL  | P12882 | MYH1 | Myosin-1 | 82.1 | 3207 | 0E+00 | STELFKIKNAYEESL  | 1489 | K | 41.8 | 7E-07 |
| B8A561 | myhz1.2 | Uncharacterized protein                           | _MK(cr)NSYEETLDQLETLK_       | 1487 | 1 | STELFKMKNSYEETL  | P12882 | MYH1 | Myosin-1 | 82.1 | 3207 | 0E+00 | STELFKIKNAYEESL  | 1489 | K | 41.8 | 7E-07 |
| B8A568 | myhz1.1 | Uncharacterized protein                           | _MK(cr)NSYEETLDQLETLK_       | 1487 | 1 | STELFKMKNSYEETL  | P12882 | MYH1 | Myosin-1 | 82.1 | 3208 | 0E+00 | STELFKIKNAYEESL  | 1489 | K | 41.8 | 7E-07 |
| B8A561 | myhz1.2 | Uncharacterized protein                           | _NSYEETLDQLETLK(cr)R_        | 1501 | 1 | LDQLETLKRENKNLQ  | P12882 | MYH1 | Myosin-1 | 82.1 | 3207 | 0E+00 | LDQLETLKRENKNLQ  | 1503 | K | 51.1 | 3E-10 |
| B8A568 | myhz1.1 | Uncharacterized protein                           | _NSYEETLDQLETLK(cr)R_        | 1501 | 1 | LDQLETLKRENKNLQ  | P12882 | MYH1 | Myosin-1 | 82.1 | 3208 | 0E+00 | LDQLETLKRENKNLQ  | 1503 | K | 51.1 | 3E-10 |
| B8A561 | myhz1.2 | Uncharacterized protein                           | _K(cr)AVETEK_                | 1533 | 1 | HELEKSKKAVETEK   | P12882 | MYH1 | Myosin-1 | 82.1 | 3207 | 0E+00 | HELEKIKKQVEQEKS  | 1535 | K | 31.6 | 3E-03 |
| Q6IQX1 | myhz2   | Uncharacterized protein                           | _VQLELNQVK(cr)GEIDR_         | 1571 | 1 | QLELNQVKGEIDRKL  | P12882 | MYH1 | Myosin-1 | 82.1 | 3210 | 0E+00 | QLELNQVKSEVDRKI  | 1573 | K | 41.8 | 7E-07 |
| B8A561 | myhz1.2 | Uncharacterized protein                           | _VQLELNQVK(cr)SEIDRK_        | 1571 | 1 | QLELNQVKSEIDRKL  | P12882 | MYH1 | Myosin-1 | 82.1 | 3207 | 0E+00 | QLELNQVKSEVDRKI  | 1573 | K | 45.2 | 4E-08 |
| B8A568 | myhz1.1 | Uncharacterized protein                           | _VQLELNQVK(cr)SEIDRK_        | 1571 | 1 | QLELNQVKSEIDRKL  | P12882 | MYH1 | Myosin-1 | 82.1 | 3208 | 0E+00 | QLELNQVKSEVDRKI  | 1573 | K | 45.2 | 4E-08 |
| Q6IQX1 | myhz2   | Myosin, heavy polypeptide 2, fast muscle specific | _LAEK(cr)DEEMEIQK_           | 1581 | 1 | IDRKLAEKDEEMEIQ  | P12882 | MYH1 | Myosin-1 | 82.1 | 3210 | 0E+00 | VDRKIAEKDEEIQDM  | 1583 | K | 36.3 | 6E-05 |
| B8A568 | myhz1.1 | Uncharacterized protein                           | _LAEK(cr)DEEIEQIKR_          | 1581 | 1 | IDRKLAEKDEEIEIQ  | P12882 | MYH1 | Myosin-1 | 82.1 | 3208 | 0E+00 | VDRKIAEKDEEIQDM  | 1583 | K | 40.1 | 3E-06 |
| B8A568 | myhz1.1 | Uncharacterized protein                           | _LAEKDEEIEQIK(cr)R_          | 1589 | 1 | DEEIEQIKRNSQRIT  | P12882 | MYH1 | Myosin-1 | 82.1 | 3208 | 0E+00 | DEEIQDMKRNRHIV   | 1591 | K | 31.2 | 4E-03 |
| B8A561 | myhz1.2 | Uncharacterized protein                           | _NVQAQLK(cr)DAQLHLDDAVR_     | 1653 | 1 | RNVQAQLKDAQLHLD  | P12882 | MYH1 | Myosin-1 | 82.1 | 3207 | 0E+00 | RNTQAILKDTQLHLD  | 1655 | K | 36.7 | 4E-05 |
| B8A561 | myhz1.2 | Uncharacterized protein                           | _GQEDMK(cr)EQVAMVER_         | 1670 | 1 | VRGQEDMKKEQVAMVE | P12882 | MYH1 | Myosin-1 | 82.1 | 3207 | 0E+00 | LRSQEDLKEQLAMVE  | 1674 | K | 38.8 | 8E-06 |
| B8A568 | myhz1.1 | Uncharacterized protein                           | _GQEDMK(cr)EQVAMVER_         | 1670 | 1 | VRGQEDMKKEQVAMVE | P12882 | MYH1 | Myosin-1 | 82.1 | 3208 | 0E+00 | LRSQEDLKEQLAMVE  | 1674 | K | 38.8 | 8E-06 |
| B8A561 | myhz1.2 | Uncharacterized protein                           | _NAEDK(cr)AK_                | 1756 | 1 | EARNAEKAKKAITD   | P12882 | MYH1 | Myosin-1 | 82.1 | 3207 | 0E+00 | EARNAEKAKKAITD   | 1758 | K | 43.4 | 2E-08 |
| B8A568 | myhz1.1 | Uncharacterized protein                           | _NAEDK(cr)AK_                | 1756 | 1 | EARNAEKAKKAITD   | P12882 | MYH1 | Myosin-1 | 82.1 | 3208 | 0E+00 | EARNAEKAKKAITD   | 1758 | K | 43.4 | 2E-08 |
| B8A561 | myhz1.2 | Uncharacterized protein                           | _K(cr)AITDAAMMAEELKK_        | 1759 | 1 | NAEDKAKKAITDAAM  | P12882 | MYH1 | Myosin-1 | 82.1 | 3207 | 0E+00 | NAEEKAKKAITDAAM  | 1761 | K | 46.9 | 1E-08 |
| B8A568 | myhz1.1 | Uncharacterized protein                           | _K(cr)AITDAAMMAEELKK_        | 1759 | 1 | NAEDKAKKAITDAAM  | P12882 | MYH1 | Myosin-1 | 82.1 | 3208 | 0E+00 | NAEEKAKKAITDAAM  | 1761 | K | 46.9 | 1E-08 |
| B8A561 | myhz1.2 | Uncharacterized protein                           | _AITDAAM(ox)M(ox)AEELK(cr)K_ | 1772 | 1 | AMMAEELKKEQD TSA | P12882 | MYH1 | Myosin-1 | 82.1 | 3207 | 0E+00 | AMMAEELKKEQD TSA | 1774 | K | 51.5 | 4E-09 |
| B8A561 | myhz1.2 | Uncharacterized protein                           | _AITDAAMMAEELK(cr)K_         | 1772 | 1 | AMMAEELKKEQD TSA | P12882 | MYH1 | Myosin-1 | 82.1 | 3207 | 0E+00 | AMMAEELKKEQD TSA | 1774 | K | 51.5 | 4E-09 |
| B8A568 | myhz1.1 | Uncharacterized protein                           | _AITDAAMMAEELK(cr)K_         | 1772 | 1 | AMMAEELKKEQD TSA | P12882 | MYH1 | Myosin-1 | 82.1 | 3208 | 0E+00 | AMMAEELKKEQD TSA | 1774 | K | 51.5 | 4E-09 |
| B8A561 | myhz1.2 | Uncharacterized protein                           | _K(cr)NLEVTVK_               | 1786 | 1 | AHLERMKKNLEVTVK  | P12882 | MYH1 | Myosin-1 | 82.1 | 3207 | 0E+00 | AHLERMKKNLEQTVK  | 1788 | K | 45.6 | 3E-08 |
| B8A561 | myhz1.2 | Uncharacterized protein                           | _VK(cr)ELTYQTEEDKK_          | 1850 | 1 | RKYERRVKELTYQTE  | P12882 | MYH1 | Myosin-1 | 82.1 | 3207 | 0E+00 | RKHERVKELTYQTE   | 1852 | K | 44.3 | 9E-08 |
| B8A568 | myhz1.1 | Uncharacterized protein                           | _VK(cr)ELTYQTEEDKK_          | 1850 | 1 | RKYERRVKELTYQTE  | P12882 | MYH1 | Myosin-1 | 82.1 | 3208 | 0E+00 | RKHERVKELTYQTE   | 1852 | K | 44.3 | 9E-08 |

|        |         |                                                   |                                  |      |   |                   |        |       |                                                                     |      |      |        |                 |      |   |      |       |
|--------|---------|---------------------------------------------------|----------------------------------|------|---|-------------------|--------|-------|---------------------------------------------------------------------|------|------|--------|-----------------|------|---|------|-------|
| B8A561 | myhz1.2 | Uncharacterized protein                           | _ELTYQTEEDK(cr)K_                | 1860 | 1 | TYQTEEDKKNVNLQ    | P12882 | MYH1  | Myosin-1                                                            | 82.1 | 3207 | 0E+00  | TYQTEEDRKNILRLQ | 1862 | R | 40.9 | 1E-06 |
| B8A568 | myhz1.1 | Uncharacterized protein                           | _ELTYQTEEDK(cr)K_                | 1860 | 1 | TYQTEEDKKNVNLQ    | P12882 | MYH1  | Myosin-1                                                            | 82.1 | 3208 | 0E+00  | TYQTEEDRKNILRLQ | 1862 | R | 40.9 | 1E-06 |
| B8A561 | myhz1.2 | Uncharacterized protein                           | _ELTYQTEEDKK(cr)NVNR_            | 1861 | 1 | YQTEEDKKNVNLQD    | P12882 | MYH1  | Myosin-1                                                            | 82.1 | 3207 | 0E+00  | YQTEEDRKNILRLQD | 1863 | K | 41.4 | 1E-06 |
| B8A568 | myhz1.1 | Uncharacterized protein                           | _ELTYQTEEDKK(cr)NVNR_            | 1861 | 1 | YQTEEDKKNVNLQD    | P12882 | MYH1  | Myosin-1                                                            | 82.1 | 3208 | 0E+00  | YQTEEDRKNILRLQD | 1863 | K | 41.4 | 1E-06 |
| B8A561 | myhz1.2 | Uncharacterized protein                           | _ADIAESQVNK(cr)LR_               | 1921 | 1 | IAESQVNLRAKSRD    | P12882 | MYH1  | Myosin-1                                                            | 82.1 | 3207 | 0E+00  | IAESQVNLRVKSRE  | 1923 | K | 43.1 | 4E-06 |
| B8A568 | myhz1.1 | Uncharacterized protein                           | _ADIAESQVNK(cr)LR_               | 1921 | 1 | IAESQVNLRAKSRD    | P12882 | MYH1  | Myosin-1                                                            | 82.1 | 3208 | 0E+00  | IAESQVNLRVKSRE  | 1923 | K | 43.1 | 4E-06 |
| Q6IQX1 | myhz2   | Myosin, heavy polypeptide 2, fast muscle specific | _DFETAQLLSK(cr)IEDEQSLGAQLQK_    | 1095 | 1 | ETAQLLSKIEDEQSL   | P12882 | MYH1  | Myosin-1                                                            | 82.1 | 3210 | 0E+00  | -               | -    | - | -    | -     |
| B8A561 | myhz1.2 | Uncharacterized protein                           | _VAK(cr)EDDVHPM(ox)NPPK_         | 74   | 1 | TKEERVAKEDDVHPM   | P12882 | MYH1  | Myosin-1                                                            | 82.1 | 3207 | 0E+00  | -               | -    | - | -    | -     |
| B8A561 | myhz1.2 | Uncharacterized protein                           | _VAK(cr)EDDVHPMNPPK_             | 74   | 1 | TKEERVAKEDDVHPM   | P12882 | MYH1  | Myosin-1                                                            | 82.1 | 3207 | 0E+00  | -               | -    | - | -    | -     |
| B8A568 | myhz1.1 | Uncharacterized protein                           | _EEK(cr)VVKEDDVHPM(ox)NPPK_      | 71   | 1 | TLDTKEEKVVKEDDV   | P12882 | MYH1  | Myosin-1                                                            | 82.1 | 3208 | 0E+00  | -               | -    | - | -    | -     |
| F1QJP3 | myl10   | Uncharacterized protein                           | _DGFIDK(cr)NDLR_                 | 45   | 1 | NRDGFIDKNDLRDTF   | P10916 | MYL2  | Myosin regulatory light chain 2, ventricular/cardiac muscle isoform | 71.1 | 251  | 2E-87  | NRDGFIDKNDLRDTF | 46   | K | 52.8 | 9E-11 |
| F1QJP3 | myl10   | Uncharacterized protein                           | _GEEIK(cr)YHLMSQADK_             | 119  | 1 | ILKGEEIKYHLMSQA   | P10916 | MYL2  | Myosin regulatory light chain 2, ventricular/cardiac muscle isoform | 71.1 | 251  | 2E-87  | -               | -    | - | -    | -     |
| O93409 | mylpfa  | Uncharacterized protein                           | _DGIISK(cr)DDLRL_                | 48   | 1 | NRDGIISKDDLRLDVL  | Q96A32 | MYLPF | Myosin regulatory light chain 2, skeletal muscle isoform            | 81.1 | 293  | 3E-104 | NRDGIIDKEDLRDTF | 47   | K | 38   | 2E-05 |
| O93409 | mylpfa  | Mylz2 protein                                     | _DVLASMGQLNVK(cr)NEELEAMIK_      | 64   | 1 | SMGQLNVKNEELEAM   | Q96A32 | MYLPF | Myosin regulatory light chain 2, skeletal muscle isoform            | 81.1 | 293  | 3E-104 | AMGRLNVKNEELDAM | 65   | K | 43.1 | 3E-07 |
| O93409 | mylpfa  | Uncharacterized protein                           | _LK(cr)GADPEDVIVSAFK_            | 93   | 1 | TMFGEKLGADPEDV    | Q96A32 | MYLPF | Myosin regulatory light chain 2, skeletal muscle isoform            | 81.1 | 293  | 3E-104 | TMFGEKLGADPEDV  | 92   | K | 51.1 | 4E-10 |
| E9QG51 | mylpfb  | Uncharacterized protein                           | _GADPEDVIVSAFK(cr)VLDPEATG TIK_  | 85   | 1 | DVIVSAFKVLDPEAT   | Q96A32 | MYLPF | Myosin regulatory light chain 2, skeletal muscle isoform            | 83.8 | 244  | 1E-85  | DVITGAFKVLDPGK  | 105  | K | 36.3 | 6E-05 |
| O93409 | mylpfa  | Mylz2 protein                                     | _GADPEDVIVSAFK(cr)VLDPEGTG SIK_  | 106  | 1 | DVIVSAFKVLDPEGT   | Q96A32 | MYLPF | Myosin regulatory light chain 2, skeletal muscle isoform            | 81.1 | 293  | 3E-104 | DVITGAFKVLDPGK  | 105  | K | 38.8 | 8E-06 |
| O93409 | mylpfa  | Mylz2 protein                                     | _FTAEEEMK(cr)NLWAAFPDVGAVN VDYK_ | 138  | 1 | RFTAEEEMKNLWAAFP  | Q96A32 | MYLPF | Myosin regulatory light chain 2, skeletal muscle isoform            | 81.1 | 293  | 3E-104 | RFSQEEIKNMWAAFP | 137  | K | 39.7 | 4E-06 |
| Q9I8U7 | mylz3   | Fast skeletal muscle myosin light polypeptide 3   | _ALGQNPTNK(cr)DVK_               | 47   | 1 | LGQNPTNKDVKKILG   | P14649 | MYL6B | Myosin light chain 6B                                               | 63.1 | 209  | 2E-70  | LGQNPTNAEVLKVLG | 103  | A | 32   | 2E-03 |
| B8JKH7 | mylz3   | Uncharacterized protein                           | _ALGQNPTNK(cr)DVK_               | 71   | 1 | LGQNPTNKDVKKILG   | P14649 | MYL6B | Myosin light chain 6B                                               | 62.5 | 135  | 3E-42  | LGQNPTNAEVLKVLG | 103  | A | 32   | 2E-03 |
| Q6P0G6 | myl1    | Uncharacterized protein                           | _ALGQNPTNK(cr)EVTK_              | 85   | 1 | LGQNPTNKEVTKILG   | P14649 | MYL6B | Myosin light chain 6B                                               | 57.1 | 237  | 3E-81  | LGQNPTNAEVLKVLG | 103  | A | 35   | 3E-03 |
| Q9I8U7 | mylz3   | Fast skeletal muscle myosin light polypeptide 3   | _IDFEAFLPMLK(cr)TV DANQK_        | 76   | 1 | EAFPLMLKTV DANQK  | P14649 | MYL6B | Myosin light chain 6B                                               | 63.1 | 209  | 2E-70  | -               | -    | - | -    | -     |
| Q9I8U7 | mylz3   | Fast skeletal muscle myosin light polypeptide 3   | _RIDFEAFLPMLK(cr)TV DANQK_       | 76   | 1 | EAFPLMLKTV DANQK  | P14649 | MYL6B | Myosin light chain 6B                                               | 63.1 | 209  | 2E-70  | -               | -    | - | -    | -     |
| B8JKH7 | mylz3   | Uncharacterized protein                           | _IDFEAFLPMLK(cr)TV DANQK_        | 100  | 1 | EAFPLMLKTV DANQK  | P14649 | MYL6B | Myosin light chain 6B                                               | 62.5 | 135  | 3E-42  | -               | -    | - | -    | -     |
| Q9I8U7 | mylz3   | Fast skeletal muscle myosin light polypeptide 3   | _TV DANQK(cr)GTYDDYVEGLR_        | 83   | 1 | KTV DANQKGTYYDDYV | P14649 | MYL6B | Myosin light chain 6B                                               | 63.1 | 209  | 2E-70  | -               | -    | - | -    | -     |

|        |                 |                                                 |                                  |     |   |                  |        |         |                                                                             |      |      |        |                  |      |   |      |       |
|--------|-----------------|-------------------------------------------------|----------------------------------|-----|---|------------------|--------|---------|-----------------------------------------------------------------------------|------|------|--------|------------------|------|---|------|-------|
| Q9I8U7 | myl23           | Fast skeletal muscle myosin light polypeptide 3 | _K(cr)ILGDPSADDM(ox)ANK_         | 51  | 1 | PTNKDVKKILGDPSA  | P14649 | MYL6B   | Myosin light chain 6B                                                       | 63.1 | 209  | 2E-70  | -                | -    | - | -    | -     |
| Q9I8U7 | myl23           | Fast skeletal muscle myosin light polypeptide 3 | _K(cr)ILGDPSADDMANK_             | 51  | 1 | PTNKDVKKILGDPSA  | P14649 | MYL6B   | Myosin light chain 6B                                                       | 63.1 | 209  | 2E-70  | -                | -    | - | -    | -     |
| B8JKH7 | myl23           | Uncharacterized protein                         | _K(cr)ILGDPSADDMANK_             | 75  | 1 | PTNKDVKKILGDPSA  | P14649 | MYL6B   | Myosin light chain 6B                                                       | 62.5 | 135  | 3E-42  | -                | -    | - | -    | -     |
| B8JKH7 | myl23           | Uncharacterized protein                         | _ILGDPSADDM(ox)ANK(cr)R_         | 88  | 1 | SADDMANKRIDFEAF  | P14649 | MYL6B   | Myosin light chain 6B                                                       | 62.5 | 135  | 3E-42  | -                | -    | - | -    | -     |
| Q6P0G6 | myl1            | Uncharacterized protein                         | _ADAVDLSGVK(cr)LDFTDQDM(ox)EDYR_ | 40  | 1 | AVDLSGVKLDFTDQDQ | P14649 | MYL6B   | Myosin light chain 6B                                                       | 57.1 | 237  | 3E-81  | -                | -    | - | -    | -     |
| Q6P0G6 | myl1            | Uncharacterized protein                         | _ADAVDLSGVK(cr)LDFTDQDMEDYR_     | 40  | 1 | AVDLSGVKLDFTDQDQ | P14649 | MYL6B   | Myosin light chain 6B                                                       | 57.1 | 237  | 3E-81  | -                | -    | - | -    | -     |
| Q6P0G6 | myl1            | Uncharacterized protein                         | _EVTK(cr)ILGNPTADDMVNKR_         | 89  | 1 | PTNKEVTKILGNPTA  | P14649 | MYL6B   | Myosin light chain 6B                                                       | 57.1 | 237  | 3E-81  | -                | -    | - | -    | -     |
| Q6P0G6 | myl1            | Uncharacterized protein                         | _ILGNPTADDMVNKR(cr)R_            | 102 | 1 | TADDMVNKRVDFFEGF | P14649 | MYL6B   | Myosin light chain 6B                                                       | 57.1 | 237  | 3E-81  | -                | -    | - | -    | -     |
| E7EYE1 | si:dkey-78p20.4 | Uncharacterized protein                         | _TELNYEILEK(cr)GHVR_             | 826 | 1 | LNYEILEKGHVRFVW  | P54296 | MYOM2   | Myomesin-2                                                                  | 56.1 | 1132 | 0E+00  | LAYEIFDKGRVRFWL  | 1029 | K | 35.4 | 1E-04 |
| Q7T334 | mdh2            | Malate dehydrogenase                            | _NLGLGK(L)LSAFEEK_               | 306 | 1 | EKNLGLGKLSAFEEK  | P40926 | MDH2    | Malate dehydrogenase, mitochondrial                                         | 84.6 | 595  | 0E+00  | EKNLIGIKVSSFEEK  | 307  | K | 38.8 | 8E-06 |
| Q7T334 | mdh2            | Malate dehydrogenase                            | _LVADAMTELK(cr)GSIK_             | 323 | 1 | ADAMTELKGSIKKGE  | P40926 | MDH2    | Malate dehydrogenase, mitochondrial                                         | 84.6 | 595  | 0E+00  | SDAIPELKASIKKGE  | 323  | K | 33.3 | 7E-04 |
| H0WE86 | mdh1aa          | Uncharacterized protein                         | _EVIPTDK(cr)VEVGFK_              | 90  | 1 | REVIPTDKVEVGFKD  | P40925 | MDH1    | Malate dehydrogenase, cytoplasmic                                           | 84.2 | 165  | 1E-52  | -                | -    | - | -    | -     |
| B3DFN3 | lmb2            | Lamin B2                                        | _VSEK(cr)EEVTTTR_                | 61  | 1 | LQFKVSEKEEVTTRE  | Q03252 | LMNB2   | Lamin-B2                                                                    | 67.7 | 754  | 0E+00  | LLLKISEKEEVTTRE  | 87   | K | 38.4 | 1E-05 |
| B3DFN3 | lmb2            | Lamin B2                                        | _EVSGIK(cr)SLYEAEELADAR_         | 73  | 1 | TREVSGIKSLYEAEEL | Q03252 | LMNB2   | Lamin-B2                                                                    | 67.7 | 754  | 0E+00  | TREVSGIKALYESEL  | 93   | K | 44.3 | 9E-08 |
| B3DFN3 | lmb2            | Lamin B2                                        | _K(cr)SMFDEEVR_                  | 203 | 1 | TEELEFRKSMFDEEV  | Q03252 | LMNB2   | Lamin-B2                                                                    | 67.7 | 754  | 0E+00  | QEELDFRKSVEFEVV  | 225  | K | 40.5 | 2E-06 |
| B3DFN3 | lmb2            | Lamin B2                                        | _FSPK(cr)FVLK_                   | 486 | 1 | IVYKFSFKFVLKAGQ  | Q03252 | LMNB2   | Lamin-B2                                                                    | 67.7 | 754  | 0E+00  | IAYKFTPKYLIRAGQ  | 520  | K | 36.3 | 6E-05 |
| B3DFN3 | lmb2            | Lamin B2                                        | _IK(cr)DLEAQYNK_                 | 130 | 1 | AAALVRKIDLEAQYN  | Q03252 | LMNB2   | Lamin-B2                                                                    | 67.7 | 754  | 0E+00  | -                | -    | - | -    | -     |
| F1QHC4 | lmb1            | Uncharacterized protein                         | _INELEGALSHEK(cr)DLSR_           | 333 | 1 | EGALSHEKDLRRLL   | P20700 | LMNB1   | Lamin-B1                                                                    | 70.0 | 749  | 0E+00  | -                | -    | - | -    | -     |
| A2CE73 | khdrbs1a        | Uncharacterized protein                         | _FNFVVGK(cr)ILGPQGSTIK_          | 88  | 1 | PRFNFVVGKILGPQGS | Q07666 | KHDRBS1 | KH domain-containing, RNA-binding, signal transduction-associated protein 1 | 56.8 | 360  | 2E-123 | PKFNFVVGKILGPQGN | 175  | K | 44.3 | 9E-08 |
| A2CE73 | khdrbs1a        | Uncharacterized protein                         | _M(ox)AHAMDEVK(cr)K_             | 165 | 1 | AHAMDEVKFLMPVE   | Q07666 | KHDRBS1 | KH domain-containing, RNA-binding, signal transduction-associated protein 1 | 56.8 | 360  | 2E-123 | AHAMEEVKFLVPDM   | 252  | K | 39.7 | 4E-06 |
| A2CE73 | khdrbs1a        | Uncharacterized protein                         | _MAHAMDEVK(cr)K_                 | 165 | 1 | AHAMDEVKFLMPVE   | Q07666 | KHDRBS1 | KH domain-containing, RNA-binding, signal transduction-associated protein 1 | 56.8 | 360  | 2E-123 | AHAMEEVKFLVPDM   | 252  | K | 39.7 | 4E-06 |
| F1QK60 | krt4            | Uncharacterized protein                         | _LEGELK(cr)NMQGLVEDFK_           | 189 | 1 | MKLEGELKNMQGLVE  | P05787 | KRT8    | Keratin, type II cytoskeletal 8                                             | 76.8 | 578  | 0E+00  | LKLEAELGNMQGLVE  | 166  | G | 38.8 | 8E-06 |
| F1R5A5 | krt5            | Uncharacterized protein                         | _AAVENEVLLK(cr)K_                | 263 | 1 | ENEVLLKKDVEDAAY  | P05787 | KRT8    | Keratin, type II cytoskeletal 8                                             | 74.1 | 573  | 0E+00  | ENEVLLKKDVEDAAY  | 197  | K | 44.3 | 1E-06 |
| F1QK60 | krt4            | Uncharacterized protein                         | _ASVENEVLLK(cr)K_                | 220 | 1 | ENEVLLKKDVEDAAY  | P05787 | KRT8    | Keratin, type II cytoskeletal 8                                             | 76.8 | 578  | 0E+00  | ENEVLLKKDVEDAAY  | 197  | K | 44.3 | 1E-06 |
| Q6NWF6 | krt8            | Keratin, type II cytoskeletal 8                 | _DVDEAYMNK(cr)VELEAK_            | 231 | 1 | VDEAYMNKVELEAKL  | P05787 | KRT8    | Keratin, type II cytoskeletal 8                                             | 68.4 | 588  | 0E+00  | VDEAYMNKVELESRL  | 207  | K | 46.4 | 2E-08 |
| Q6NWF6 | krt8            | Lamin B2                                        | _K(cr)LLEGEEDR_                  | 417 | 1 | IEIATYRKLLGEED   | P05787 | KRT8    | Keratin, type II cytoskeletal 8                                             | 68.4 | 588  | 0E+00  | IEIATYRKLLGEES   | 393  | K | 48.1 | 4E-09 |
| F1QK60 | krt4            | Uncharacterized protein                         | _GELAVK(cr)DAK_                  | 370 | 1 | ERGELAVKDAKLIR   | P05787 | KRT8    | Keratin, type II cytoskeletal 8                                             | 76.8 | 578  | 0E+00  | -                | -    | - | -    | -     |
| F1QK60 | krt4            | Uncharacterized protein                         | _QLDGLGNEK(cr)MK_                | 181 | 1 | LDGLGNEKMKLEGEL  | P05787 | KRT8    | Keratin, type II cytoskeletal 8                                             | 76.8 | 578  | 0E+00  | -                | -    | - | -    | -     |



|        |                   |                                                     |                           |     |   |                   |        |                        |                                                     |      |       |                 |                  |     |      |       |       |
|--------|-------------------|-----------------------------------------------------|---------------------------|-----|---|-------------------|--------|------------------------|-----------------------------------------------------|------|-------|-----------------|------------------|-----|------|-------|-------|
| F1QEW2 | si:dkkey-183i3.5  | Uncharacterized protein (Fragment)                  | _FASFIDK(cr)AR_           | 191 | 1 | HNAVLRAKISMFTNP   | Q95678 | KRT75                  | Keratin, type II cytoskeletal 75                    | 30.8 | 186   | 1E-52           | -                | -   | -    | -     | -     |
| F1QK60 | krt4              | Uncharacterized protein                             | _AEAESWYK(cr)QK_          | 306 | 1 | AEAESWYKQKFEEMQ   | P02538 | KRT6A                  | Keratin, type II cytoskeletal 6A                    | 70.0 | 533   | 0E+00           | AEAESWYQTKYEELQ  | 357 | Q    | 38.4  | 1E-05 |
| F1QK60 | krt4              | Uncharacterized protein                             | _QK(cr)FEEMQSTAGQYGDDLRL_ | 308 | 1 | AESWYKQKFEEMQST   | Q9NSB2 | KRT84                  | Keratin, type II cuticular Hb4                      | 52.0 | 496   | 2E-171          | AEAWYQTKYEEMQVT  | 359 | K    | 34.6  | 3E-04 |
| Q7ZTS4 | krt18             | Keratin, type I cytoskeletal 18                     | _K(cr)VIDDTNLR_           | 191 | 1 | ADITGLRKVIDDTNL   | P05783 | KRT18                  | Keratin, type I cytoskeletal 18                     | 54.1 | 436   | 2E-152          | NDIHGLRKVIDDTNI  | 189 | K    | 38.4  | 1E-05 |
| Q7ZTS4 | krt18             | Keratin, type I cytoskeletal 18                     | _LLDGGDFK(cr)LQDALEEQK_   | 394 | 1 | LLDGGDFKLDQDALEE  | P05783 | KRT18                  | Keratin, type I cytoskeletal 18                     | 54.1 | 436   | 2E-152          | -                | -   | -    | -     | -     |
| E9QDY3 | cyt1              | Uncharacterized protein                             | _K(cr)VLDELTM(ox)TR_      | 211 | 1 | ADIVGLRKVLDELTM   | Q04695 | KRT17                  | Keratin, type I cytoskeletal 17                     | 60.5 | 416   | 5E-144          | ADINGLRRVLDELTL  | 192 | R    | 37.1  | 3E-05 |
| E9QDY3 | cyt1              | Uncharacterized protein                             | _K(cr)VLDELTMTR_          | 211 | 1 | ADIVGLRKVLDELTM   | Q04695 | KRT17                  | Keratin, type I cytoskeletal 17                     | 60.5 | 416   | 5E-144          | ADINGLRRVLDELTL  | 192 | R    | 37.1  | 3E-05 |
| E9QDY3 | cyt1              | Uncharacterized protein                             | _EELIFLK(cr)K_            | 238 | 1 | KEELIFLKNHEEEL    | Q04695 | KRT17                  | Keratin, type I cytoskeletal 17                     | 60.5 | 416   | 5E-144          | KEELAYLKNHEEEM   | 219 | K    | 41.4  | 1E-06 |
| E9QDY3 | cyt1              | Uncharacterized protein                             | _SEITEVK(cr)R_            | 323 | 1 | RSEITEVKRTLQSL    | Q04695 | KRT17                  | Keratin, type I cytoskeletal 17                     | 60.5 | 416   | 5E-144          | KSEISELRRMQALE   | 305 | R    | 31.6  | 3E-03 |
| E9QDY3 | cyt1              | Uncharacterized protein                             | _SESLNK(cr)EVAVSTETLQTSR_ | 303 | 1 | AKSESLNKEVAVSTE   | Q04695 | KRT17                  | Keratin, type I cytoskeletal 17                     | 60.5 | 416   | 5E-144          | -                | -   | -    | -     | -     |
| E9QDY3 | cyt1              | Uncharacterized protein                             | _ANADLELK(cr)IR_          | 134 | 1 | ANADLELKRQFLDS    | Q04695 | KRT17                  | Keratin, type I cytoskeletal 17                     | 60.5 | 416   | 5E-144          | -                | -   | -    | -     | -     |
| E9QDY3 | cyt1              | Uncharacterized protein                             | _K(cr)DLESWFQAK_          | 288 | 1 | AVSAKNRKDLESWFQ   | Q04695 | KRT17                  | Keratin, type I cytoskeletal 17                     | 60.5 | 416   | 5E-144          | -                | -   | -    | -     | -     |
| E9QDY3 | cyt1              | Uncharacterized protein                             | _ATTETK(cr)TT_            | 448 | 1 | SKATTETKTT_____   | Q04695 | KRT17                  | Keratin, type I cytoskeletal 17                     | 60.5 | 416   | 5E-144          | -                | -   | -    | -     | -     |
| E9QDY3 | cyt1              | Uncharacterized protein                             | _DLESWFQAK(cr)SESLNK_     | 297 | 1 | LESWFQAKSESLNKE   | P08779 | KRT16                  | Keratin, type I cytoskeletal 16                     | 60.0 | 398   | 1E-135          | AETWFLSKTEELNKE  | 313 | K    | 31.2  | 4E-03 |
| E7F4R9 | -                 | Isocitrate dehydrogenase [NADP]                     | _NTILK(cr)AYDGR_          | 252 | 1 | STKNILKAYDGRFK    | P48735 | IDH2                   | Isocitrate dehydrogenase [NADP], mitochondrial      | 61.4 | 536   | 0E+00           | STKNILKAYDGRFK   | 256 | K    | 50.3  | 7E-10 |
| E7F4R9 | -                 | Isocitrate dehydrogenase [NADP]                     | _FK(cr)DIFQDIFEK_         | 259 | 1 | KAYDGRFKDIFQDIF   | P48735 | IDH2                   | Isocitrate dehydrogenase [NADP], mitochondrial      | 61.4 | 536   | 0E+00           | KAYDGRFKDIFQEIF  | 263 | K    | 51.1  | 4E-10 |
| E7F4R9 | -                 | Isocitrate dehydrogenase [NADP]                     | _TNLDK(cr)ALGK_           | 443 | 1 | AIKTNLDKALGK_____ | P48735 | IDH2                   | Isocitrate dehydrogenase [NADP], mitochondrial      | 61.4 | 536   | 0E+00           | -                | -   | -    | -     | -     |
| Q08CK7 | igf2bp1           | Insulin-like growth factor 2 mRNA-binding protein 1 | _QTQSK(cr)IDVHR_          | 231 | 1 | ITKQTQSKIDVHRKE   | Q9NZI8 | IGF2BP1                | Insulin-like growth factor 2 mRNA-binding protein 1 | 80.6 | 912   | 0E+00           | ITKQTQSKIDVHRKE  | 228 | K    | 51.1  | 4E-10 |
| Q08CK7 | igf2bp1           | Insulin-like growth factor 2 mRNA-binding protein 1 | _LKEENFFGPK(cr)EEVK_      | 485 | 1 | EENFFGPKKEEVKLET  | Q9NZI8 | IGF2BP1                | Insulin-like growth factor 2 mRNA-binding protein 1 | 80.6 | 912   | 0E+00           | EENFFGPKKEEVKLET | 483 | K    | 52    | 2E-10 |
| Q08CK7 | igf2bp1           | Insulin-like growth factor 2 mRNA-binding protein 1 | _VTAEDLVK(cr)TFEDYK_      | 20  | 1 | VTAEDLVKTFEDYKI   | Q9NZI8 | IGF2BP1                | Insulin-like growth factor 2 mRNA-binding protein 1 | 80.6 | 912   | 0E+00           | -                | -   | -    | -     | -     |
| E7F7C7 | -                 | Histone H4                                          | _GVLK(cr)VFLENVIR_        | 60  | 1 | EETRGVLKVFLENVI   | P62805 | HIST1H4A               | Histone H4                                          | 97.0 | 190   | 9E-65           | EETRGVLKVFLENVI  | 60  | K    | 50.7  | 5E-10 |
| E7F7C7 | -                 | Histone H4                                          | _DAVTYTEHAK(cr)R_         | 78  | 1 | VTYTEHAKRKTVTAM   | P62805 | HIST1H4A               | Histone H4                                          | 97.0 | 190   | 9E-65           | VTYTEHAKRKTVTAM  | 78  | K    | 51.5  | 3E-10 |
| Q4QRF4 | si:dkkeyp-46h3.6  | Histone H3.2                                        | _VTIM(ox)PK(cr)DIQLAR_    | 123 | 1 | KRVTIMPKDIQLARR   | Q71DI3 | HIST2H3A; Histone H3.2 | 100.0                                               | 274  | 9E-98 | KRVTIMPKDIQLARR | 123              | K   | 52.4 | 1E-10 |       |
| Q4QRF4 | si:dkkeyp-46h3.6  | Histone H3.2                                        | _VTIMPK(cr)DIQLAR_        | 123 | 1 | KRVTIMPKDIQLARR   | Q71DI3 | HIST2H3A; Histone H3.2 | 100.0                                               | 274  | 9E-98 | KRVTIMPKDIQLARR | 123              | K   | 52.4 | 1E-10 |       |
| Q05AK8 | si:ch73-368j24.9  | Histone H2B                                         | _PEPAK(cr)TAPK_           | 6   | 1 | __MPEPAKTAPKKG    | Q16778 | HIST2H2E               | Histone H2B type 2-E                                | 92.9 | 231   | 3E-81           | __MPEPAKSAPAPKK  | 6   | K    | 35.8  | 6E-05 |
| E7F2T3 | si:ch1073-159d7.7 | Uncharacterized protein                             | _DLIVK(cr)TVTASKE_        | 53  | 1 | NVRDLIVKTVTASKE   | P16401 | HIST1H1B               | Histone H1.5                                        | 64.3 | 105   | 6E-29           | -                | -   | -    | -     | -     |
| A3KPR3 | histh11           | Uncharacterized protein                             | _IALK(cr)ALVK_            | 75  | 1 | SRVKIALKALVKRGA   | P16401 | HIST1H1B               | Histone H1.5                                        | 64.7 | 109   | 1E-30           | -                | -   | -    | -     | -     |
| E7F225 | zgc:163061        | Uncharacterized protein                             | _GMVTK(cr)GVLK_           | 82  | 1 | AIKGMVTKGVLKQVK   | P16402 | HIST1H1D               | Histone H1.3                                        | 66.4 | 103   | 2E-29           | -                | -   | -    | -     | -     |
| E7F225 | zgc:163061        | Uncharacterized protein                             | _LAIK(cr)GMVTK_           | 77  | 1 | SRVKLAIKGMVTKGV   | P16402 | HIST1H1D               | Histone H1.3                                        | 66.4 | 103   | 2E-29           | -                | -   | -    | -     | -     |

|        |            |                                                |                             |     |   |                  |        |          |                                                |      |      |        |                 |     |   |      |       |
|--------|------------|------------------------------------------------|-----------------------------|-----|---|------------------|--------|----------|------------------------------------------------|------|------|--------|-----------------|-----|---|------|-------|
| E7F225 | zgc:163061 | Uncharacterized protein                        | _GVLK(cr)QVK_               | 86  | 1 | MVTKGVLKQVKGTGA  | P07305 | H1F0     | Histone H1.0                                   | 44.0 | 73.9 | 1E-17  | LVTTGVLKQTKGVGA | 82  | K | 31.2 | 4E-03 |
| Q5RHQ7 | hnrnpub    | Uncharacterized protein                        | _DEASK(cr)LLEK_             | 581 | 1 | LQKDEASKLLEKYKE  | Q00839 | HNRNPU   | Heterogeneous nuclear ribonucleoprotein U      | 58.6 | 723  | 0E+00  | LQKEEAQKLEQYKE  | 664 | K | 38.8 | 8E-06 |
| E7F3J2 | hnrnpua    | Uncharacterized protein                        | _AFTVSK(cr)DELK_            | 345 | 1 | GKAFTVSKDELKGP   | Q00839 | HNRNPU   | Heterogeneous nuclear ribonucleoprotein U      | 59.0 | 693  | 0E+00  | -               | -   | - | -    | -     |
| Q7SXN2 | hnrpd1     | Heterogeneous nuclear ribonucleoprotein D-like | _VAQPK(cr)EVYR_             | 193 | 1 | EIKVAQPKEVYRQQQ  | Q14979 | HNRNPDL  | Heterogeneous nuclear ribonucleoprotein D-like | 74.0 | 390  | 1E-136 | EIKVAQPKEVYRQQQ | 311 | K | 52.4 | 1E-10 |
| E7FAQ8 | hnrnpa1a   | Uncharacterized protein                        | _K(cr)MFVGGIK_              | 107 | 1 | GAHSTVKKMFVGGIK  | P09651 | HNRNPA1  | Heterogeneous nuclear ribonucleoprotein A1     | 81.8 | 347  | 1E-118 | GAHLTVKKIFVGGIK | 106 | K | 38.4 | 1E-05 |
| F1QTL9 | hnrnpa0b   | Uncharacterized protein                        | _PHVVDGK(cr)NVEVK_          | 76  | 1 | RPHVVDGKNVEVKRA  | Q13151 | HNRNPA0  | Heterogeneous nuclear ribonucleoprotein A0     | 55.0 | 229  | 5E-74  | SPHAVDGNVELKRA  | 76  | N | 31.6 | 3E-03 |
| F1QS28 | hnrnpa0a   | Uncharacterized protein                        | _K(cr)IFIGGLK_              | 102 | 1 | EALAKVKKIFIGGLK  | Q13151 | HNRNPA0  | Heterogeneous nuclear ribonucleoprotein A0     | 68.7 | 261  | 2E-87  | GAHAKVKKLVFGGLK | 105 | K | 32.9 | 1E-03 |
| F1QTL9 | hnrnpa0b   | Uncharacterized protein                        | _SEVITDK(cr)DTGK_           | 134 | 1 | KSEVITDKDTGKKRG  | Q13151 | HNRNPA0  | Heterogeneous nuclear ribonucleoprotein A0     | 55.0 | 229  | 5E-74  | KAEIADKQSGKKRG  | 133 | K | 33.3 | 7E-04 |
| F1Q6U4 | hbae3      | Uncharacterized protein                        | _ANVK(cr)AFFDK_             | 12  | 1 | AKDKANVKAFFDKVA  | P02008 | HBZ      | Hemoglobin subunit zeta                        | 42.7 | 112  | 5E-34  | -               | -   | - | -    | -     |
| F1Q6U4 | hbae3      | Uncharacterized protein                        | _VAPK(cr)AEEIGR_            | 21  | 1 | FFDKVAPKAEIEIGRE | P02008 | HBZ      | Hemoglobin subunit zeta                        | 42.7 | 112  | 5E-34  | -               | -   | - | -    | -     |
| F1Q6U4 | hbae3      | Uncharacterized protein                        | _AFFDK(cr)VAPK_             | 17  | 1 | NVKAFFDKVAPKAEE  | P02008 | HBZ      | Hemoglobin subunit zeta                        | 42.7 | 112  | 5E-34  | -               | -   | - | -    | -     |
| Q7ZT21 | hbae1      | Embryonic alpha globin e1                      | _AAVK(cr)TLWAK_             | 12  | 1 | AKDKAAVKTLWAKIA  | P02008 | HBZ      | Hemoglobin subunit zeta                        | 54.5 | 164  | 7E-54  | -               | -   | - | -    | -     |
| F6NT71 | hbbe1.1    | Uncharacterized protein                        | _TVLK(cr)GLELAVK_           | 11  | 1 | AHGKTVLKGLELAVK  | P02100 | HBE1     | Hemoglobin subunit epsilon                     | 52.9 | 101  | 7E-30  | -               | -   | - | -    | -     |
| F6NT71 | hbbe1.1    | Uncharacterized protein                        | _GLELAVK(cr)NMDNIK_         | 18  | 1 | KGLELAVKNMDNIKA  | P02100 | HBE1     | Hemoglobin subunit epsilon                     | 52.9 | 101  | 7E-30  | -               | -   | - | -    | -     |
| O93548 | bE1        | Embryonic 1 beta-globin                        | _TVLK(cr)GLELAVK_           | 70  | 1 | AHGKTVLKGLELAVK  | P02100 | HBE1     | Hemoglobin subunit epsilon                     | 51.7 | 164  | 9E-54  | -               | -   | - | -    | -     |
| O93548 | bE1        | Embryonic 1 beta-globin                        | _GLELAVK(cr)NM(ox)DNIK_     | 77  | 1 | KGLELAVKNMDNIKA  | P02100 | HBE1     | Hemoglobin subunit epsilon                     | 51.7 | 164  | 9E-54  | -               | -   | - | -    | -     |
| O93548 | bE1        | Embryonic 1 beta-globin                        | _ATIQDIFAK(cr)ADYDVIGPQALAR | 18  | 1 | TIQDIFAKADYDVIG  | P02100 | HBE1     | Hemoglobin subunit epsilon                     | 51.7 | 164  | 9E-54  | -               | -   | - | -    | -     |
| O93548 | bE1        | Embryonic 1 beta-globin                        | _GLELAVK(cr)NMDNIK_         | 18  | 1 | TIQDIFAKADYDVIG  | P02100 | HBE1     | Hemoglobin subunit epsilon                     | 51.7 | 164  | 9E-54  | -               | -   | - | -    | -     |
| E7EZ16 | -          | Uncharacterized protein                        | _DLK(cr)IDIIPNVQER_         | 71  | 1 | LDSGKDLKIDIIPNV  | P08238 | HSP90AB1 | Heat shock protein HSP 90-beta                 | 90.0 | 1220 | 0E+00  | LDSGKELKIDIIPNP | 72  | K | 44.8 | 6E-08 |
| E7EZ16 | -          | Uncharacterized protein                        | _EK(cr)YIDQEELNK_           | 259 | 1 | KKKKIKEKYIDQEEL  | P07900 | HSP90AA1 | Heat shock protein HSP 90-alpha                | 84.0 | 1187 | 0E+00  | KKKKIKEKYIDQEEL | 283 | K | 52   | 2E-10 |
| E7EZ16 | -          | Uncharacterized protein                        | _EMLQSK(cr)ILK_             | 383 | 1 | REMLQSKILKLVIRK  | P07900 | HSP90AA1 | Heat shock protein HSP 90-alpha                | 84.0 | 1187 | 0E+00  | REMLQSKILKLVIRK | 407 | K | 52   | 2E-10 |
| Q90474 | hsp90a.1   | Heat shock protein HSP 90-alpha 1              | _DTQK(cr)HIYYITGETK_        | 482 | 1 | SRMKDTQKHIYYITG  | P07900 | HSP90AA1 | Heat shock protein HSP 90-alpha                | 84.4 | 1191 | 0E+00  | TRMKENQKHIYYITG | 491 | K | 45.2 | 4E-08 |
| E7EZ16 | -          | Uncharacterized protein                        | _AEADKNDK(cr)AVK_           | 633 | 1 | AEADKNDKAVKDLVI  | P07900 | HSP90AA1 | Heat shock protein HSP 90-alpha                | 84.0 | 1187 | 0E+00  | AEADKNDKSVKDLVI | 657 | K | 46.4 | 2E-08 |
| Q6NYR4 | hspa8      | Heat shock cognate 71 kDa protein              | _NQVAM(ox)NPTNTVFDK(cr)R_   | 71  | 1 | TNTVFDKALRIGRRF  | P11142 | HSPA8    | Heat shock cognate 71 kDa protein              | 95.8 | 1218 | 0E+00  | TNTVFDKALRIGRRF | 71  | K | 51.1 | 4E-10 |
| Q6NYR4 | hspa8      | Heat shock cognate 71 kDa protein              | _PK(cr)VQVEYK_              | 102 | 1 | INDNSRPKVQVEYKG  | P11142 | HSPA8    | Heat shock cognate 71 kDa protein              | 95.8 | 1218 | 0E+00  | VNDAGRPKVQVEYKG | 102 | K | 40.5 | 2E-06 |
| Q90473 | hspa8      | Heat shock cognate 71 kDa protein              | _MK(cr)EIAEAYLGK_           | 128 | 1 | SMVLTKMKEIAEAYL  | P11142 | HSPA8    | Heat shock cognate 71 kDa protein              | 94.6 | 1202 | 0E+00  | SMVLTKMKEIAEAYL | 128 | K | 52.4 | 1E-10 |
| Q6NYR4 | hspa8      | Heat shock cognate 71 kDa protein              | _MK(cr)EIAEAYLGK_           | 128 | 1 | SMVLTKMKEIAEAYL  | P11142 | HSPA8    | Heat shock cognate 71 kDa protein              | 95.8 | 1218 | 0E+00  | SMVLTKMKEIAEAYL | 128 | K | 52.4 | 1E-10 |
| Q90473 | hspa8      | Heat shock cognate 71 kDa protein              | _GTLDPVEK(cr)ALR_           | 319 | 1 | GTLDPVEKALRDAKM  | P11142 | HSPA8    | Heat shock cognate 71 kDa protein              | 94.6 | 1202 | 0E+00  | GTLDPVEKALRDAKL | 319 | K | 46   | 2E-08 |
| Q6NYR4 | hspa8      | Heat shock cognate 71 kDa protein              | _GTLDPVEK(cr)ALR_           | 319 | 1 | GTLDPVEKALRDAKM  | P11142 | HSPA8    | Heat shock cognate 71 kDa protein              | 95.8 | 1218 | 0E+00  | GTLDPVEKALRDAKL | 319 | K | 46   | 2E-08 |

|        |            |                                                |                              |     |   |                  |        |        |                                                                   |      |      |        |                 |     |   |      |       |
|--------|------------|------------------------------------------------|------------------------------|-----|---|------------------|--------|--------|-------------------------------------------------------------------|------|------|--------|-----------------|-----|---|------|-------|
| Q6NYR4 | hspa8      | Heat shock cognate 71 kDa protein              | _ENK(cr)ITITNDK_             | 500 | 1 | KSTGKENKITITNDK  | P11142 | HSPA8  | Heat shock cognate 71 kDa protein                                 | 95.8 | 1218 | 0E+00  | KSTGKENKITITNDK | 500 | K | 49.4 | 1E-09 |
| Q90473 | hspa8      | Heat shock cognate 71 kDa protein              | _STVEDEK(cr)LK_              | 557 | 1 | KSTVEDEKLGKISD   | P11142 | HSPA8  | Heat shock cognate 71 kDa protein                                 | 94.6 | 1202 | 0E+00  | KATVEDEKLGQKIND | 557 | K | 39.2 | 6E-06 |
| Q90473 | hspa8      | Heat shock cognate 71 kDa protein              | _EEFEHQQK(cr)ELEK_           | 597 | 1 | EEFEHQQKELEKVCN  | P11142 | HSPA8  | Heat shock cognate 71 kDa protein                                 | 94.6 | 1202 | 0E+00  | EEFEHQQKELEKVCN | 597 | K | 54.1 | 3E-11 |
| Q6NYR4 | hspa8      | Heat shock cognate 71 kDa protein              | _EEFEHQQK(cr)ELEK_           | 597 | 1 | EEFEHQQKELEKVCN  | P11142 | HSPA8  | Heat shock cognate 71 kDa protein                                 | 95.8 | 1218 | 0E+00  | EEFEHQQKELEKVCN | 597 | K | 54.1 | 3E-11 |
| Q6NZU0 | hspa4b     | Heat shock protein 4                           | _QIYIDK(cr)LAELK_            | 676 | 1 | PKQIYIDKLAELKNL  | P34932 | HSPA4  | Heat shock 70 kDa protein 4                                       | 71.6 | 1236 | 0E+00  | PKQVYVDKLAELKNL | 674 | K | 46.4 | 2E-08 |
| I3ISK4 | gnb3b      | Uncharacterized protein                        | _TPVIK(cr)TVK_               | 132 | 1 | NLKTVPVIKTVKELDA | P16520 | GNB3   | Guanine nucleotide-binding protein G                              | 62.9 | 200  | 2E-65  | -               | -   | - | -    | -     |
| Q71N41 | gamt       | Guanidinoacetate N-methyltransferase           | _NK(cr)YDNIDK_               | 179 | 1 | WGELLKNKYDNIDKM  | Q14353 | GAMT   | Guanidinoacetate N-methyltransferase                              | 73.6 | 365  | 1E-130 | -               | -   | - | -    | -     |
| P79735 | ran        | GTP-binding nuclear protein Ran                | _AK(cr)SIVFHR_               | 133 | 1 | KDRKVKAKSIVFHRK  | P62826 | RAN    | GTP-binding nuclear protein Ran                                   | 94.9 | 428  | 4E-156 | KDRKVKAKSIVFHRK | 134 | K | 50.3 | 1E-08 |
| Q6NV37 | gyg1a      | Glycogenin 1                                   | _AVLHK(cr)YDEVRL_            | 53  | 1 | PSRAVLHKIYDEVRL  | P46976 | GYG1   | Glycogenin-1                                                      | 60.1 | 445  | 1E-158 | -               | -   | - | -    | -     |
| Q503C7 | pygma      | Alpha-1,4 glucan phosphorylase                 | _VLYPNDNFFEGK(cr)ELR_        | 290 | 1 | NDNFFEGKELRLKQE  | P11217 | PYGM   | Glycogen phosphorylase, muscle form                               | 85.0 | 1495 | 0E+00  | NDNFFEGKELRLKQE | 290 | K | 52.4 | 1E-10 |
| E9QGA9 | gapdh      | Glyceraldehyde-3-phosphate dehydrogenase       | _AAFLTK(cr)K_                | 24  | 1 | TRAAFLTKKVEIVAI  | P04406 | GAPDH  | Glyceraldehyde-3-phosphate dehydrogenase                          | 86.5 | 404  | 2E-144 | TRAAFNSGKVDIVAI | 26  | G | 31.6 | 3E-03 |
| E9QGA9 | gapdh      | Glyceraldehyde-3-phosphate dehydrogenase       | _GASQNIIPASTGAAK(cr)AVGK_    | 213 | 1 | PASTGAAKAVGKVIP  | P04406 | GAPDH  | Glyceraldehyde-3-phosphate dehydrogenase                          | 86.5 | 404  | 2E-144 | PASTGAAKAVGKVIP | 215 | K | 46   | 2E-08 |
| Q6P3L9 | glud1b     | Glutamate dehydrogenase 1                      | _GATIVENK(cr)LVEDLK_         | 68  | 1 | GATIVENKLVEDLKT  | P00367 | GLUD1  | Glutamate dehydrogenase 1, mitochondrial                          | 83.2 | 974  | 0E+00  | GASIVEDKLVEDLRT | 84  | K | 40.5 | 2E-06 |
| Q58EE9 | gfap       | Glial fibrillary acidic protein                | _SK(cr)FADLTDAANR_           | 272 | 1 | TEEWYRSKFADLTDA  | P14136 | GFAP   | Glial fibrillary acidic protein                                   | 65.7 | 568  | 0E+00  | AEEWYRSKFADLTDA | 261 | K | 50.3 | 7E-10 |
| F1R431 | -          | Uncharacterized protein                        | _NLQK(cr)TVK_                | 603 | 1 | QTSKNLQKTVKLPRL  | P06396 | GSN    | Gelsolin                                                          | 59.0 | 911  | 0E+00  | -               | -   | - | -    | -     |
| Q6TH14 | -          | Enolase                                        | _AVDHVNK(cr)DIAPK_           | 71  | 1 | KAVDHVNKDIAPKLI  | P09104 | ENO2   | Gamma-enolase                                                     | 83.0 | 756  | 0E+00  | KAVDHINSTIAPALI | 71  | S | 32   | 2E-03 |
| Q6GQM9 | eno2       | Eno2 protein                                   | _TAIDK(cr)AGFTDK_            | 233 | 1 | LIKTAIDKAGFTDKV  | P09104 | ENO2   | Gamma-enolase                                                     | 83.6 | 769  | 0E+00  | LVKEAIDKAGYTEKI | 233 | K | 33.3 | 7E-04 |
| Q0D276 | zgc:153846 | Uncharacterized protein                        | _GK(cr)VIFYEDR_              | 3   | 1 | ____MGKVIFYEDR   | P07316 | CRYGB  | Gamma-crystallin B                                                | 52.5 | 206  | 2E-69  | ____MGKITFYEDR  | 3   | K | 31.6 | 1E-03 |
| Q15I85 | crygEM2-4  | Crygm2d3 protein                               | _MK(cr)VTFEFDR_              | 2   | 1 | MKVTFEFDR        | P07316 | CRYGB  | Gamma-crystallin B                                                | 50.3 | 194  | 7E-65  | -               | -   | - | -    | -     |
| I3ISQ0 | lgals2b    | Galectin                                       | _GDVK(cr)IISVK_              | 118 | 1 | VHVKGDVKIISVKAK  | P09382 | LGALS1 | Galectin-1                                                        | 47.2 | 127  | 1E-39  | -               | -   | - | -    | -     |
| E9QBQ4 | aldob      | Fructose-bisphosphate aldolase                 | _GVLFPK(cr)VIK_              | 96  | 1 | DKGVLPFKVIKDKGI  | P09972 | ALDOC  | Fructose-bisphosphate aldolase C                                  | 79.3 | 346  | 1E-121 | -               | -   | - | -    | -     |
| Q8UVG7 | fabp3      | Fatty acid binding protein 3, muscle and heart | _LLHVQK(cr)WDGK_             | 97  | 1 | GKLLHVQKWDGKETT  | P05413 | FABP3  | Fatty acid-binding protein, heart                                 | 74.0 | 199  | 4E-68  | GKLVHLQKWDGQETT | 97  | K | 39.7 | 4E-06 |
| F8W3N3 | fabp7a     | Uncharacterized protein                        | _LVDSQNFDEYMK(cr)SLGVGFAT R_ | 22  | 1 | QNFDEYMKSLGVGFA  | O15540 | FABP7  | Fatty acid-binding protein, brain                                 | 83.9 | 212  | 2E-73  | QNFDEYMKALGVGFA | 22  | K | 49.8 | 1E-09 |
| H0WEH3 | khsrp      | Uncharacterized protein                        | _GGETIK(cr)QLQER_            | 198 | 1 | GKGGETIKQLQERAG  | Q92945 | KHSRP  | Far upstream element-binding protein 2                            | 68.6 | 261  | 3E-84  | GKGGETIKQLQERAG | 257 | K | 48.1 | 4E-09 |
| Q6ZM50 | capza1b    | Si:dkey-16k6.1                                 | _TK(cr)IDWNK_                | 268 | 1 | QLPVTRTKIDWNKIL  | P52907 | CAPZA1 | F-actin-capping protein subunit alpha-1                           | 81.5 | 486  | 2E-176 | QLPVTRTKIDWNKIL | 268 | K | 53.2 | 6E-11 |
| Q6PH15 | slc1a2b    | Amino acid transporter                         | _PK(cr)HVEVR_                | 3   | 1 | ____MPKHVEVRMH   | P43004 | SLC1A2 | Excitatory amino acid transporter 2                               | 78.7 | 864  | 0E+00  | EGANNMPKQVEVRMH | 17  | K | 35.8 | 3E-05 |
| B0UY94 | EIF5A2     | Eukaryotic translation initiation factor 5A    | _LPEGDLGK(cr)EIESK_          | 122 | 1 | LPEGDLGKEIESKF   | P63241 | EIF5A  | Eukaryotic translation initiation factor 5A-1                     | 84.4 | 230  | 4E-80  | LPEGDLGKEIEQKYD | 121 | K | 39.2 | 5E-06 |
| Q803E5 | etf1b      | Eukaryotic translation termination factor 1    | _LQAK(cr)VLK_                | 249 | 1 | FDPRLQAKVLKLVDI  | P62495 | ETF1   | Eukaryotic peptide chain release factor subunit 1                 | 96.2 | 867  | 0E+00  | FDQRLQSKVLKLVDI | 249 | K | 43.5 | 2E-07 |
| Q68EH0 | gspt1      | Uncharacterized protein                        | _TIAIGK(cr)VLK_              | 555 | 1 | GKTIAGKVLKLVPE   | P15170 | GSPT1  | Eukaryotic peptide chain release factor GTP-binding subunit ERF3A | 87.3 | 875  | 0E+00  | GKTIAGKVLKLVPE  | 490 | K | 48.1 | 4E-09 |

|        |         |                                                         |                               |     |   |                  |        |         |                                                         |      |      |       |                  |     |   |      |       |
|--------|---------|---------------------------------------------------------|-------------------------------|-----|---|------------------|--------|---------|---------------------------------------------------------|------|------|-------|------------------|-----|---|------|-------|
| Q802C9 | eif4a1a | Eukaryotic translation initiation factor 4A, isoform 1A | _YLSPK(cr)YIK_                | 174 | 1 | NRRYLSPKYIKMFAL  | P60842 | EIF4A1  | Eukaryotic initiation factor 4A-I                       | 89.7 | 745  | 0E+00 | NRRYLSPKYIKMFVL  | 174 | K | 50.7 | 5E-10 |
| Q7T3L3 | hsp90b1 | Chaperone protein GP96                                  | _EELVK(cr)NLGTIAK_            | 161 | 1 | MTKEELVKNLGTIAK  | P14625 | HSP90B1 | Endoplasmic                                             | 85.2 | 1304 | 0E+00 | MTRTELKLNLTIAK   | 161 | K | 47.3 | 8E-09 |
| Q7T3L3 | hsp90b1 | Chaperone protein GP96                                  | _ETLQQH(cr)LLK_               | 455 | 1 | RETLQQHKLKLVIRK  | P14625 | HSP90B1 | Endoplasmic                                             | 85.2 | 1304 | 0E+00 | RETLQQHKLKLVIRK  | 455 | K | 51.1 | 4E-10 |
| Q7T3L3 | hsp90b1 | Chaperone protein GP96                                  | _EAESSPFVEK(cr)LLK_           | 557 | 1 | ESSPFVEKLLKGYE   | P14625 | HSP90B1 | Endoplasmic                                             | 85.2 | 1304 | 0E+00 | ESSPFVERLLKGYE   | 557 | R | 47.3 | 8E-09 |
| Q7T3L3 | hsp90b1 | Chaperone protein GP96                                  | _FDESDK(cr)AK_                | 603 | 1 | VKFDESDKAKEKREA  | P14625 | HSP90B1 | Endoplasmic                                             | 85.2 | 1304 | 0E+00 | VKFDESEKTESREA   | 603 | K | 39.7 | 4E-06 |
| Q6P3J5 | eef2b   | Eukaryotic translation elongation factor 2              | _STLDSLVS(cr)AGIISAR_         | 42  | 1 | LDSLVSAGIISAR    | P13639 | EEF2    | Elongation factor 2                                     | 92.9 | 1643 | 0E+00 | LDSLVSAGIISAR    | 42  | K | 42.2 | 5E-07 |
| Q6P3J5 | eef2b   | Eukaryotic translation elongation factor 2              | _IK(cr)PVLMMNK_               | 152 | 1 | QAIAERIKPVLMMNK  | P13639 | EEF2    | Elongation factor 2                                     | 92.9 | 1643 | 0E+00 | QAIAERIKPVLMMNK  | 152 | K | 53.2 | 6E-11 |
| Q6P3J5 | eef2b   | Eukaryotic translation elongation factor 2              | _EETAK(cr)LIEK_               | 314 | 1 | FKKEETAKLIEKLDI  | P13639 | EEF2    | Elongation factor 2                                     | 92.9 | 1643 | 0E+00 | FKKEETAKLIEKLDI  | 314 | K | 50.7 | 5E-10 |
| Q6P3J5 | eef2b   | Eukaryotic translation elongation factor 2              | _LDIK(cr)LDTEDKDK_            | 322 | 1 | LIEKLDIKLDTEDKDK | P13639 | EEF2    | Elongation factor 2                                     | 92.9 | 1643 | 0E+00 | LIEKLDIKLDTEDKDK | 322 | K | 48.1 | 4E-09 |
| Q6P3J5 | eef2b   | Eukaryotic translation elongation factor 2              | _ARFPDGLAEDIDK(cr)GDVSSR_     | 619 | 1 | GLAEDIDKGDVSSRQ  | P13639 | EEF2    | Elongation factor 2                                     | 92.9 | 1643 | 0E+00 | GLAEDIDKGEVSARQ  | 619 | K | 43.5 | 3E-06 |
| Q6PE25 | eef1g   | Elongation factor 1-gamma                               | _QATEQAK(cr)EEVK_             | 132 | 1 | KQATEQAKEEVKRVL  | P26641 | EEF1G   | Elongation factor 1-gamma                               | 77.2 | 731  | 0E+00 | KQATENAKEEVRRIL  | 132 | K | 39.7 | 4E-06 |
| Q92005 | eef1a   | Elongation factor 1-alpha                               | _TIEK(cr)FEK_                 | 41  | 1 | IDKRTIEKFEKEAAE  | P68104 | EEF1A1  | Elongation factor 1-alpha 1                             | 92.0 | 882  | 0E+00 | IDKRTIEKFEKEAAE  | 41  | K | 51.1 | 4E-10 |
| Q92005 | eef1a   | Elongation factor 1-alpha                               | _FEK(cr)EAAEMGK_              | 44  | 1 | RTIEKFEKEAAEMGK  | P68104 | EEF1A1  | Elongation factor 1-alpha 1                             | 92.0 | 882  | 0E+00 | RTIEKFEKEAAEMGK  | 44  | K | 51.5 | 3E-10 |
| Q92005 | eef1a   | Elongation factor 1-alpha                               | _FEEITK(cr)EVSAYIK_           | 172 | 1 | ARFEEITKEVSAYIK  | P68104 | EEF1A1  | Elongation factor 1-alpha 1                             | 92.0 | 882  | 0E+00 | KRYEEIVKEVSTYIK  | 172 | K | 38.4 | 1E-05 |
| Q92005 | eef1a   | Elongation factor 1-alpha                               | _KLEDNPK(cr)ALK_              | 392 | 1 | KKLEDNPKALKSGDA  | P68104 | EEF1A1  | Elongation factor 1-alpha 1                             | 92.0 | 882  | 0E+00 | KKLEDGPKFLKSGDA  | 392 | K | 37.5 | 2E-05 |
| Q92005 | eef1a   | Elongation factor 1-alpha                               | _QTVAVGVIK(cr)SVEK_           | 439 | 1 | TVAVGVIKSVEKIG   | P68104 | EEF1A1  | Elongation factor 1-alpha 1                             | 92.0 | 882  | 0E+00 | TVAVGVIKAVDKKAA  | 439 | K | 36.3 | 6E-05 |
| F1R0W9 | dctn1a  | Uncharacterized protein                                 | _EALEAK(cr)DR_                | 239 | 1 | AREALEAKDRYMEEM  | Q14203 | DCTN1   | Dynactin subunit 1                                      | 69.8 | 1720 | 0E+00 | AKEALEAKERYMEEM  | 290 | K | 48.1 | 4E-09 |
| Q6TNU6 | didh    | Dihydropyridinase                                       | _TNADTGLVK(cr)ILSHK_          | 438 | 1 | ADTDGLVKILSHKDT  | P09622 | DLD     | Dihydropyridinase, mitochondrial                        | 83.6 | 870  | 0E+00 | ADTDGMVKILGQKST  | 440 | K | 34.6 | 3E-04 |
| F1R8W4 | desma   | Uncharacterized protein                                 | _TVLIK(cr)TIETR_              | 452 | 1 | SKKTVLIKTIETRDG  | P17661 | DES     | Desmin                                                  | 70.3 | 614  | 0E+00 | TKKTVMIKTIETRDG  | 451 | K | 43.9 | 1E-07 |
| E7FC21 | nt5c2a  | Uncharacterized protein                                 | _YVVK(cr)DAK_                 | 228 | 1 | NLEKYVVKDAKLPLL  | P49902 | NT5C2   | Cytosolic purine 5'-nucleotidase                        | 90.2 | 737  | 0E+00 | NLEKYVVKDGKLPLL  | 228 | K | 46.9 | 1E-08 |
| Q4VBU7 | cox5aa  | Cox5aa protein                                          | _GMNTLIGYDLVPEPK(cr)ILDAALR_  | 78  | 1 | YDLVPEPKILDAALR  | P20674 | COX5A   | Cytochrome c oxidase subunit 5A, mitochondrial          | 73.7 | 212  | 5E-73 | YDMVPEPKILDAALR  | 87  | K | 45.2 | 5E-08 |
| Q6TNV0 | cox4i1  | Cytochrome c oxidase subunit IV isoform 1               | _FVQQLSADQK(cr)SLK_           | 60  | 1 | QQLSADQKSLKEKEK  | P13073 | COX4I1  | Cytochrome c oxidase subunit 4 isoform 1, mitochondrial | 63.3 | 244  | 1E-84 | KHLSASQKALKEKEK  | 62  | K | 35   | 2E-04 |
| A2BHA3 | ckma    | Uncharacterized protein                                 | _HNNHMAK(cr)VLTK_             | 32  | 1 | KHNNHMAKVLTKEMY  | P06732 | CKM     | Creatine kinase M-type                                  | 88.5 | 708  | 0E+00 | KHNNHMAKVLTLLEY  | 32  | K | 44.3 | 9E-08 |
| Q7T306 | ckmb    | Ckmb protein                                            | _VLTK(cr)DIYNK_               | 35  | 1 | HMSKVLTKDIYNKLR  | P06732 | CKM     | Creatine kinase M-type                                  | 85.4 | 682  | 0E+00 | HMAKVLTLLEYKCLR  | 36  | L | 33.7 | 5E-04 |
| A2BHA3 | ckma    | Uncharacterized protein                                 | _VLTK(cr)EMYGK_               | 36  | 1 | HMAKVLTKEMYGKLR  | P06732 | CKM     | Creatine kinase M-type                                  | 88.5 | 708  | 0E+00 | HMAKVLTLLEYKCLR  | 36  | L | 37.1 | 3E-05 |
| A2BHA3 | ckma    | Uncharacterized protein                                 | _TDLNFENLK(cr)GGDDLDPNVLS SR_ | 116 | 1 | DLNFENLKGDDLDP   | P06732 | CKM     | Creatine kinase M-type                                  | 88.5 | 708  | 0E+00 | DLNHENLKGDDLDP   | 116 | K | 44.8 | 6E-08 |
| Q7T306 | ckmb    | Uncharacterized protein                                 | _GK(cr)YYPLK_                 | 171 | 1 | LDGEFKGKYPLKDM   | P06732 | CKM     | Creatine kinase M-type                                  | 85.4 | 682  | 0E+00 | LTGEFKGKYPLKSM   | 172 | K | 43.1 | 2E-07 |
| A2BHA3 | ckma    | Uncharacterized protein                                 | _GK(cr)YYPLK_                 | 172 | 1 | LDGEFKGKYPLKSM   | P06732 | CKM     | Creatine kinase M-type                                  | 88.5 | 708  | 0E+00 | LTGEFKGKYPLKSM   | 172 | K | 47.3 | 8E-09 |
| A2BHA3 | ckma    | Uncharacterized protein                                 | _LSVEALSSLDGEFK(cr)GK_        | 170 | 1 | SSLDGEFKGKYPLK   | P06732 | CKM     | Creatine kinase M-type                                  | 88.5 | 708  | 0E+00 | NSLTGEFKGKYPLK   | 172 | K | 42.6 | 4E-07 |
| Q7T306 | ckmb    | Uncharacterized protein                                 | _GGNMK(cr)EVFK_               | 246 | 1 | MQGGNMKEVFKRFC   | P06732 | CKM     | Creatine kinase M-type                                  | 85.4 | 682  | 0E+00 | MEKGGNMKEVFKRFC  | 247 | K | 49   | 2E-09 |

|        |           |                                                                    |                          |      |   |                  |        |         |                                           |       |      |        |                 |      |   |      |       |
|--------|-----------|--------------------------------------------------------------------|--------------------------|------|---|------------------|--------|---------|-------------------------------------------|-------|------|--------|-----------------|------|---|------|-------|
| A2BHA3 | ckma      | Uncharacterized protein                                            | _GGNMK(cr)EVFK_          | 247  | 1 | MQKGGNMKEVFKRFC  | P06732 | CKM     | Creatine kinase M-type                    | 88.5  | 708  | 0E+00  | MEKGGNMKEVFRRFC | 247  | K | 49   | 2E-09 |
| Q7T306 | ckmb      | Uncharacterized protein                                            | _GGVHVK(cr)LPK_          | 297  | 1 | LRGGVHVKLPKLSH   | P06732 | CKM     | Creatine kinase M-type                    | 85.4  | 682  | 0E+00  | LRGGVHVKLAHLSKH | 298  | K | 35   | 2E-04 |
| A2BHA3 | ckma      | Uncharacterized protein                                            | _GGVHVK(cr)LPK_          | 298  | 1 | LRGGVHVKLPKLSH   | P06732 | CKM     | Creatine kinase M-type                    | 88.5  | 708  | 0E+00  | LRGGVHVKLAHLSKH | 298  | K | 35   | 2E-04 |
| Q7T306 | ckmb      | Uncharacterized protein                                            | _LSTHAK(cr)FEEILTR_      | 306  | 1 | PKLSTHAKFEEILTR  | P06732 | CKM     | Creatine kinase M-type                    | 85.4  | 682  | 0E+00  | AHLSKHPKFEEILTR | 311  | K | 36.7 | 4E-05 |
| A2BHA3 | ckma      | Uncharacterized protein                                            | _LSTHAK(cr)FEEILTR_      | 307  | 1 | PKLSTHAKFEEILTR  | P06732 | CKM     | Creatine kinase M-type                    | 88.5  | 708  | 0E+00  | AHLSKHPKFEEILTR | 311  | K | 36.7 | 4E-05 |
| Q7T306 | ckmb      | Uncharacterized protein                                            | _LMVEMEK(cr)K_           | 364  | 1 | KLMVEMEKLEKGES   | P06732 | CKM     | Creatine kinase M-type                    | 85.4  | 682  | 0E+00  | KLMVEMEKLEKQGS  | 365  | K | 49   | 2E-09 |
| A2BHA3 | ckma      | Uncharacterized protein                                            | _LMVEMEK(cr)K_           | 365  | 1 | KLMVEMEKLEKGES   | P06732 | CKM     | Creatine kinase M-type                    | 88.5  | 708  | 0E+00  | KLMVEMEKLEKQGS  | 365  | K | 49   | 2E-09 |
| Q8AY63 | ckbb      | Brain-subtype creatine kinase                                      | _GK(cr)YYALK_            | 172  | 1 | LDGDLKGYALKDM    | P12277 | CKB     | Creatine kinase B-type                    | 85.8  | 706  | 0E+00  | LDGDLAGRYALKSM  | 172  | R | 38   | 2E-05 |
| Q8AY63 | ckbb      | Brain-subtype creatine kinase                                      | _LPNVSK(cr)HEK_          | 304  | 1 | VKLPNVSKHEKFGEI  | P12277 | CKB     | Creatine kinase B-type                    | 85.8  | 706  | 0E+00  | IKLPNLGKHEKFSEV | 304  | K | 35.4 | 1E-04 |
| Q8AY63 | ckbb      | Brain-subtype creatine kinase                                      | _HEK(cr)FGEILK_          | 307  | 1 | PNVSKHEKFGEILKR  | P12277 | CKB     | Creatine kinase B-type                    | 85.8  | 706  | 0E+00  | PNLGKHEKFSEVLKR | 307  | K | 38   | 2E-05 |
| B8JN01 | -         | Histone H2A                                                        | _DFLETVK(cr)ELR_         | 241  | 1 | KDFLETVKELRKSQG  | Q9P0M6 | H2AFY2  | Core histone macro-H2A.2                  | 69.0  | 335  | 2E-115 | KEFLETVKELRKSQG | 246  | K | 47.3 | 8E-09 |
| E7FEZ9 | atox1     | Copper chaperone Atox1                                             | _FDIDLPNK(cr)K_          | 37   | 1 | FDIDLPNKKVFIESD  | O00244 | ATOX1   | Copper transport protein ATOX1            | 71.2  | 93.6 | 3E-28  | YDIDLPNKKVCIESE | 38   | K | 37.5 | 2E-05 |
| E7EYX7 | cirpbp    | Uncharacterized protein                                            | _YGTIAK(cr)V DVIR_       | 33   | 1 | SKYGTIAKVDVIRDR  | Q14011 | CIRBP   | Cold-inducible RNA-binding protein        | 44.9  | 110  | 2E-31  | -               | -    | - | -    | -     |
| Q6PFT7 | cotl1     | Coactosin-like 1                                                   | _ISTDK(cr)ALVK_          | 98   | 1 | RAKISTDKALVKDAV  | Q14019 | COTL1   | Coactosin-like 1                          | 71.1  | 218  | 2E-75  | RAKTGTDKTLVKEVV | 98   | K | 31.2 | 4E-03 |
| E9QBV1 | cltcb     | Clathrin heavy chain                                               | _AQLQK(cr)GLVK_          | 1118 | 1 | LAKAQLQKGLVKEAI  | Q00610 | CLTC    | Clathrin heavy chain                      | 95.6  | 3334 | 0E+00  | LAKAQLQKGMVKEAI | 1118 | K | 45.2 | 7E-07 |
| E9QBV1 | cltcb     | Clathrin heavy chain                                               | _VNIPK(cr)VLR_           | 1347 | 1 | WSRVNIPKVLRAAEQ  | Q00610 | CLTC    | Clathrin heavy chain                      | 95.6  | 3334 | 0E+00  | WSRVNIPKVLRAAEQ | 1347 | K | 52   | 2E-10 |
| E7FF12 | -         | Uncharacterized protein                                            | _TMATEK(cr)LLK_          | 163  | 1 | MRTMATEKLLKAMPA  | O60641 | SNAP91  | Clathrin coat assembly protein AP180      | 83.0  | 407  | 9E-138 | MRTMAPEKLLKSMPI | 163  | K | 43.1 | 2E-07 |
| Q6IQV0 | zgc:86598 | Uncharacterized protein                                            | _IAK(cr)VLGTEDLYIDK_     | 247  | 1 | DQLVRIAKVLGTEDL  | P68400 | CSNK2A1 | Casein kinase II subunit alpha            | 89.3  | 688  | 0E+00  | DQLVRIAKVLGTEDL | 247  | K | 49.4 | 1E-09 |
| A5WWJ4 | matn1     | Uncharacterized protein                                            | _AK(cr)ALGFK_            | 393  | 1 | GDAAKKAKALGFKMY  | P21941 | MATN1   | Cartilage matrix protein                  | 71.8  | 704  | 0E+00  | NDAAKKAKDLGFKMF | 402  | K | 39.7 | 6E-05 |
| A5WWJ4 | matn1     | Uncharacterized protein                                            | _AALVK(cr)AVSK_          | 103  | 1 | KTKAALVKAVSKIEP  | P21941 | MATN1   | Cartilage matrix protein                  | 71.8  | 704  | 0E+00  | -               | -    | - | -    | -     |
| A5WWJ4 | matn1     | Uncharacterized protein                                            | _VFLAK(cr)VIDGLSVGPDATR_ | 63   | 1 | QVKVFLAKVIDGLSV  | P21941 | MATN1   | Cartilage matrix protein                  | 71.8  | 704  | 0E+00  | -               | -    | - | -    | -     |
| Q92051 | cahz      | Carbonic anhydrase 4                                               | _LQK(cr)VLDALDDIK_       | 158  | 1 | AANPRLQKVLDALDD  | P00915 | CA1     | Carbonic anhydrase 4                      | 61.0  | 329  | 1E-114 | EANPKLQKVLDALQA | 162  | K | 36.7 | 4E-05 |
| Q6PI52 | calm1a    | Calmodulin                                                         | _M(ox)K(cr)DTDSEEEIR_    | 78   | 1 | TMMARKMKDSEEEE   | P62158 | CALM1   | Calmodulin                                | 100.0 | 298  | 5E-107 | TMMARKMKDSEEEE  | 78   | K | 54.5 | 2E-11 |
| Q6PI52 | calm1a    | Calmodulin                                                         | _MK(cr)DTDSEEEIR_        | 78   | 1 | TMMARKMKDSEEEE   | P62158 | CALM1   | Calmodulin                                | 100.0 | 298  | 5E-107 | TMMARKMKDSEEEE  | 78   | K | 54.5 | 2E-11 |
| Q6TH14 | -         | Enolase                                                            | _IDK(cr)FMLELDGTENK_     | 126  | 1 | CKAGAAEKGVPLYRH  | P13929 | ENO3    | Beta-enolase                              | 85.9  | 784  | 0E+00  | CKAGAAEKGVPLYRH | 126  | K | 50.3 | 7E-10 |
| Q6TH14 | -         | Enolase                                                            | _IEEELGDK(cr)AK_         | 420  | 1 | IEEELGDKAKFAGKD  | P13929 | ENO3    | Beta-enolase                              | 85.9  | 784  | 0E+00  | IEEELGDEARFAGRK | 420  | E | 35.4 | 1E-04 |
| Q6TH14 | -         | Enolase                                                            | _DIAPK(cr)LIEK_          | 76   | 1 | VNKDIAPKLEKFKFS  | P13929 | ENO3    | Beta-enolase                              | 85.9  | 784  | 0E+00  | -               | -    | - | -    | -     |
| Q6DRD1 | atp5o     | ATP synthase oligomycin sensitivity conferral protein              | _QK(cr)TFVDALTK_         | 87   | 1 | VKRSVKQKTFVDALT  | P48047 | ATP5O   | ATP synthase subunit O, mitochondrial     | 61.4  | 273  | 9E-95  | -               | -    | - | -    | -     |
| Q5RH26 | atp5c1    | ATP synthase subunit gamma                                         | _SIK(cr)NIQK_            | 34   | 1 | TIRLKSIIKIQKIK   | P36542 | ATP5C1  | ATP synthase subunit gamma, mitochondrial | 77.8  | 479  | 2E-173 | TRRLKSIIKIQKIK  | 39   | K | 44.8 | 6E-08 |
| Q6PC77 | atp5h     | ATP synthase, H+-transporting, mitochondrial F0 complex, subunit d | _AAVK(cr)AIDWLFAER_      | 9    | 1 | AGRRAAVKAI DWLAF | O75947 | ATP5H   | ATP synthase subunit d, mitochondrial     | 60.2  | 213  | 2E-72  | -               | -    | - | -    | -     |
| Q6PC77 | atp5h     | ATP synthase, H+-transporting, mitochondrial F0 complex, subunit d | _AVVAK(cr)AGMVDEFEK_     | 63   | 1 | HYRAVVAKAGMVDEF  | O75947 | ATP5H   | ATP synthase subunit d, mitochondrial     | 60.2  | 213  | 2E-72  | -               | -    | - | -    | -     |
| A8WGC6 | atp5b     | ATP synthase subunit beta                                          | _GQK(cr)VLDTGAPIR_       | 113  | 1 | EGLVRGQKVLDTGAP  | P06576 | ATP5B   | ATP synthase subunit beta, mitochondrial  | 89.2  | 927  | 0E+00  | EGLVRGQKVLDSGAP | 124  | K | 45.2 | 4E-08 |
| A8WGC6 | atp5b     | ATP synthase subunit beta                                          | _GVQK(cr)ILQDYK_         | 415  | 1 | DVARGVQKILQDYKS  | P06576 | ATP5B   | ATP synthase subunit beta, mitochondrial  | 89.2  | 927  | 0E+00  | DVARGVQKILQDYKS | 426  | K | 50.3 | 7E-10 |

|        |         |                                    |                             |      |   |                  |        |        |                                           |      |      |        |                  |     |   |      |       |
|--------|---------|------------------------------------|-----------------------------|------|---|------------------|--------|--------|-------------------------------------------|------|------|--------|------------------|-----|---|------|-------|
| Q08BA1 | atp5a1  | ATP synthase subunit alpha         | _LIK(cr)EGDIVK_             | 125  | 1 | FGNDKLIKEGDIVKR  | P25705 | ATP5A1 | ATP synthase subunit alpha, mitochondrial | 91.3 | 1010 | 0E+00  | FGNDKLIKEGDIVKR  | 126 | K | 50.7 | 5E-10 |
| Q08BA1 | atp5a1  | ATP synthase subunit alpha         | _FNEGTEEK(cr)K_             | 238  | 1 | FNEGTEEEKKLYCIY  | P25705 | ATP5A1 | ATP synthase subunit alpha, mitochondrial | 91.3 | 1010 | 0E+00  | FNDGSDEKKKLYCIY  | 239 | K | 46   | 2E-08 |
| Q08BA1 | atp5a1  | ATP synthase subunit alpha         | _GHLDK(cr)MEPSK_            | 497  | 1 | GVRGHLDKMEPSKIT  | P25705 | ATP5A1 | ATP synthase subunit alpha, mitochondrial | 91.3 | 1010 | 0E+00  | GVRGYLDKLEPSKIT  | 498 | K | 41.8 | 7E-07 |
| B8JIS1 | atp5f1  | Uncharacterized protein            | _LNADK(cr)IAK_              | 127  | 1 | ADKLNADKIAKAQEV  | P24539 | ATP5F1 | ATP synthase F                            | 57.7 | 285  | 2E-98  | -                | -   | - | -    | -     |
| F1QA12 | -       | Uncharacterized protein (Fragment) | _LAK(cr)EQAEK_              | 539  | 1 | AEKERLAKEQAEKEK  | Q12797 | ASPH   | Aspartyl/asparaginyl beta-hydroxylase     | 58.0 | 68.2 | 1E-11  | -                | -   | - | -    | -     |
| B8A5D3 | nars    | Uncharacterized protein            | _EK(cr)NLEEAK_              | 101  | 1 | EDAERREKNLEEAKK  | O43776 | NARS   | Asparagine--tRNA ligase, cytoplasmic      | 81.8 | 973  | 0E+00  | EDSLRREKNLEEAKK  | 93  | K | 40.9 | 1E-06 |
| Q503V2 | apoEa   | Uncharacterized protein            | _FNEDLQLLVTK(cr)LR_         | 107  | 1 | DLQLLVTKLRTHMEE  | P02649 | APOE   | Apolipoprotein E                          | 26.2 | 110  | 2E-29  | -                | -   | - | -    | -     |
| Q503V2 | apoEa   | Uncharacterized protein            | _THMEEAK(cr)DR_             | 116  | 1 | RTHMEEAKDRVTEYT  | P02649 | APOE   | Apolipoprotein E                          | 26.2 | 110  | 2E-29  | -                | -   | - | -    | -     |
| E9QFX0 | apoc1   | Uncharacterized protein            | _EIAEDLADK(cr)TK_           | 47   | 1 | IAEDLADKTKTAFQN  | P02654 | APOC1  | Apolipoprotein C-I                        | 38.6 | 40   | 1E-06  | -                | -   | - | -    | -     |
| E9QFX0 | apoc1   | Uncharacterized protein            | _FGTQMK(cr)EIAEDLADK_       | 38   | 1 | TKFGTQMKIEAEDLA  | P02654 | APOC1  | Apolipoprotein C-I                        | 38.6 | 40   | 1E-06  | -                | -   | - | -    | -     |
| Q5TZ29 | apobb.1 | Uncharacterized protein            | _EEIQK(cr)FLK_              | 2362 | 1 | DIREEQKFLKHASS   | P04114 | APOB   | Apolipoprotein B-100                      | 30.3 | 1487 | 0E+00  | -                | -   | - | -    | -     |
| Q5TZ29 | apobb.1 | Uncharacterized protein            | _EVLMK(cr)VIFDK_            | 518  | 1 | EGREVLKMKVIFDKAA | P04114 | APOB   | Apolipoprotein B-100                      | 30.3 | 1487 | 0E+00  | -                | -   | - | -    | -     |
| Q5TZ29 | apobb.1 | Uncharacterized protein            | _SK(cr)VEEILSELK_           | 2104 | 1 | EYFAIKSKVEEILSE  | P04114 | APOB   | Apolipoprotein B-100                      | 30.3 | 1487 | 0E+00  | -                | -   | - | -    | -     |
| Q5TZ29 | apobb.1 | Uncharacterized protein            | _VK(cr)VVDVVK_              | 2320 | 1 | IEKLEKVKVVDVVK   | P04114 | APOB   | Apolipoprotein B-100                      | 30.3 | 1487 | 0E+00  | -                | -   | - | -    | -     |
| Q5TZ29 | apobb.1 | Uncharacterized protein            | _VVELIK(cr)K_               | 2203 | 1 | KKVVVELIKFNIEET  | P04114 | APOB   | Apolipoprotein B-100                      | 30.3 | 1487 | 0E+00  | -                | -   | - | -    | -     |
| Q5TZ29 | apobb.1 | Uncharacterized protein            | _IPALPEFTFPK(cr)K_          | 1208 | 1 | LPEFTFPKFLFLNAE  | P04114 | APOB   | Apolipoprotein B-100                      | 30.3 | 1487 | 0E+00  | -                | -   | - | -    | -     |
| Q5TZ29 | apobb.1 | Uncharacterized protein            | _K(cr)LFLNAEAAK_            | 1209 | 1 | PEFTFPKFLFLNAEG  | P04114 | APOB   | Apolipoprotein B-100                      | 30.3 | 1487 | 0E+00  | -                | -   | - | -    | -     |
| Q5TZ29 | apobb.1 | Uncharacterized protein            | _AK(cr)QLLNLGNR_            | 2161 | 1 | SKILEKAKQLLNLG   | P04114 | APOB   | Apolipoprotein B-100                      | 30.3 | 1487 | 0E+00  | -                | -   | - | -    | -     |
| Q5TZ29 | apobb.1 | Uncharacterized protein            | _QVAVFDQEK(cr)FTEDVK_       | 2123 | 1 | VAVFDQEKFTEDVKN  | P04114 | APOB   | Apolipoprotein B-100                      | 30.3 | 1487 | 0E+00  | -                | -   | - | -    | -     |
| Q5TZ29 | apobb.1 | Uncharacterized protein            | _VVDVVK(cr)K_               | 2326 | 1 | VKVVDVVKKFSDIVD  | P04114 | APOB   | Apolipoprotein B-100                      | 30.3 | 1487 | 0E+00  | -                | -   | - | -    | -     |
| O42363 | apoA1   | Apolipoprotein A-I                 | _AFESNIEETK(cr)SK_          | 180  | 1 | ESNIEETKSKVPMV   | P02647 | APOA1  | Apolipoprotein A-I                        | 25.4 | 95.9 | 3E-24  | -                | -   | - | -    | -     |
| O42363 | apoA1   | Apolipoprotein A-I                 | _EQLVK(cr)AVEEAR_           | 218  | 1 | EYKEQLVKAVEEARE  | P02647 | APOA1  | Apolipoprotein A-I                        | 25.4 | 95.9 | 3E-24  | -                | -   | - | -    | -     |
| O42363 | apoA1   | Apolipoprotein A-I                 | _AAALVYLNQVK(cr)DQAEK_      | 44   | 1 | LVLYLNQVKDQAEKAL | P02647 | APOA1  | Apolipoprotein A-I                        | 25.4 | 95.9 | 3E-24  | -                | -   | - | -    | -     |
| O42363 | apoA1   | Apolipoprotein A-I                 | _SK(cr)VVPMVEAVR_           | 182  | 1 | NIEETKSKVPMVEA   | P02647 | APOA1  | Apolipoprotein A-I                        | 25.4 | 95.9 | 3E-24  | -                | -   | - | -    | -     |
| E7FES0 | -       | Uncharacterized protein            | _ELTELGEQVK(cr)PHFEGIFK_    | 240  | 1 | TELGEQVKPHFEGIF  | P02647 | APOA1  | Apolipoprotein A-I                        | 29.0 | 84.3 | 3E-19  | -                | -   | - | -    | -     |
| E7FES0 | -       | Uncharacterized protein            | _K(cr)ELTELGEQVKPHFEGIFK_   | 230  | 1 | VKSGELRKELTELGE  | P02647 | APOA1  | Apolipoprotein A-I                        | 29.0 | 84.3 | 3E-19  | -                | -   | - | -    | -     |
| Q804G7 | anxa4   | Annexin                            | _AIDMLDIK(cr)AEFLK_         | 286  | 1 | EIDMLDIKAEFLKMY  | P09525 | ANXA4  | Annexin A4                                | 64.5 | 428  | 1E-152 | EIDMLDIRAHFKRLY  | 284 | R | 33.3 | 7E-04 |
| A2BFV8 | anxa1a  | Annexin                            | _EIGDIK(cr)QVYK_            | 148  | 1 | NKEIGDIKQVYKQEY  | P04083 | ANXA1  | Annexin A1                                | 62.6 | 276  | 7E-94  | -                | -   | - | -    | -     |
| B8A4A7 | sncga   | Gamma-synuclein                    | _TK(cr)AGVEEAAAK_           | 23   | 1 | VAAAEKTKAGVEEAA  | P37840 | SNCA   | Alpha-synuclein                           | 58.0 | 95.9 | 7E-27  | VAAAEKTKQGVAEAA  | 23  | K | 37.5 | 2E-05 |
| F1R8P5 | -       | Uncharacterized protein            | _TK(cr)AGVEEAAALK_          | 23   | 1 | VAAAEKTKAGVEEAA  | P37840 | SNCA   | Alpha-synuclein                           | 64.0 | 104  | 3E-30  | VAAAEKTKQGVAEAA  | 23  | K | 37.5 | 2E-05 |
| E9QJ16 | eno3    | Enolase                            | _ac)SISK(cr)IHAR_           | 5    | 1 | MSISIKIHAREILD   | P06733 | ENO1   | Alpha-enolase                             | 84.5 | 491  | 1E-176 | MSILKIHAREIFD    | 6   | I | 35.4 | 9E-05 |
| Q6PC12 | eno1a   | Enolase 1, (Alpha)                 | _GGK(cr)YDLDFK_             | 256  | 1 | SEFYKGGKYDLDFKS  | P06733 | ENO1   | Alpha-enolase                             | 90.5 | 823  | 0E+00  | SEFFRSGKYDLDFKS  | 256 | K | 41.8 | 7E-07 |
| Q6PC12 | eno1a   | Enolase 1, (Alpha)                 | _IEEELGDK(cr)AR_            | 420  | 1 | IEEELGDKARFAGKN  | P06733 | ENO1   | Alpha-enolase                             | 90.5 | 823  | 0E+00  | IEEELGSKAKFAGRN  | 420 | K | 38.4 | 1E-05 |
| D1GJ56 | actn3a  | Actn3a                             | _YLDIPK(cr)MLDAEDIVNTPKPEK_ | 229  | 1 | EKFLDIPKMLDADDI  | Q08043 | ACTN3  | Alpha-actinin-3                           | 83.9 | 1570 | 0E+00  | EKYLIDIPKMLDAEDI | 234 | K | 47.7 | 6E-09 |
| Q8AX99 | actn3b  | Actn3b                             | _YLDIPK(cr)MLDAEDIVNTPKPEK_ | 231  | 1 | EKYLIDIPKMLDAEDI | P35609 | ACTN2  | Alpha-actinin-2                           | 83.7 | 1587 | 0E+00  | EKHLIDIPKMLDAEDI | 227 | K | 48.1 | 4E-09 |
| Q8AX99 | actn3b  | Actn3b                             | _K(cr)HEAFESDLAAHQDR_       | 447  | 1 | EIRALMRKHEAFESD  | P35609 | ACTN2  | Alpha-actinin-2                           | 83.7 | 1587 | 0E+00  | EVRALLRKHEAFESD  | 443 | K | 46   | 2E-08 |
| D1GJ56 | actn3a  | Actn3a                             | _K(cr)HEAFESDLAAHQDR_       | 445  | 1 | EIRALMRKHEAFESD  | P35609 | ACTN2  | Alpha-actinin-2                           | 83.7 | 1587 | 0E+00  | EVRALLRKHEAFESD  | 443 | K | 46   | 2E-08 |

|        |         |                                                               |                               |     |   |                  |        |         |                                                               |       |      |        |                 |     |   |      |       |
|--------|---------|---------------------------------------------------------------|-------------------------------|-----|---|------------------|--------|---------|---------------------------------------------------------------|-------|------|--------|-----------------|-----|---|------|-------|
| F1QZU7 | aldh2.2 | Uncharacterized protein (Fragment)                            | _ADVDK(cr)AVK_                | 77  | 1 | GDKADVDKAVKAARD  | P05091 | ALDH2   | Aldehyde dehydrogenase, mitochondrial                         | 76.6  | 852  | 0E+00  | GDKEDVDKAVKAARA | 78  | K | 40.9 | 2E-05 |
| Q8JH10 | slc25a5 | Solute carrier family 25 alpha, member 5                      | _DFLAGGIAAISK(cr)TAVAPIER_    | 23  | 1 | GIAAAISKTAVAPIE  | P05141 | SLC25A5 | ADP/ATP translocase 2                                         | 92.9  | 574  | 0E+00  | GVAIAISKTAVAPIE | 23  | K | 44.3 | 9E-08 |
| Q8JH10 | slc25a5 | Solute carrier family 25 alpha, member 5                      | _K(cr)VFLDGVDK_               | 97  | 1 | AFKDKYKQVFLDGV   | P05141 | SLC25A5 | ADP/ATP translocase 2                                         | 92.9  | 574  | 0E+00  | AFKDKYKQVFLGGVD | 97  | Q | 40.1 | 3E-06 |
| Q8JH10 | slc25a5 | Solute carrier family 25 alpha, member 5                      | _LAADVKG(cr)AGAER_            | 147 | 1 | RLAADVKGAGAEREF  | P05141 | SLC25A5 | ADP/ATP translocase 2                                         | 92.9  | 574  | 0E+00  | RLAADVKGAGAEREF | 147 | K | 48.1 | 4E-09 |
| Q8JH10 | slc25a5 | Solute carrier family 25 alpha, member 5                      | _DEGGK(cr)AFFK_               | 268 | 1 | IARDEGGKAFFKGAW  | P05141 | SLC25A5 | ADP/ATP translocase 2                                         | 92.9  | 574  | 0E+00  | IARDEGGKAFFKGAW | 268 | K | 51.1 | 4E-10 |
| Q68EH2 | ak1     | Adenylate kinase isoenzyme 1                                  | _ADVSK(cr)GYLDGYPR_           | 88  | 1 | IAKADVSKGYLDIGY  | P00568 | AK1     | Adenylate kinase isoenzyme 1                                  | 73.7  | 305  | 6E-108 | VAKVNTSKGFLDIGY | 88  | K | 33.7 | 5E-04 |
| Q68EH2 | ak1     | Adenylate kinase isoenzyme 1                                  | _DAMIAK(cr)ADVSK_             | 83  | 1 | IKDAMIAKADVSKGY  | P00568 | AK1     | Adenylate kinase isoenzyme 1                                  | 73.7  | 305  | 6E-108 | -               | -   | - | -    | -     |
| Q6P5L2 | dbi     | Uncharacterized protein                                       | _AAEEVK(cr)QLK_               | 14  | 1 | QKAAEEVKQLKAKPT  | P07108 | DBI     | Acyl-CoA-binding protein                                      | 79.3  | 142  | 5E-47  | EKAAEEVRLHKTGPS | 14  | R | 33.7 | 5E-04 |
| Q6P5L2 | dbi     | Uncharacterized protein                                       | _AYIAK(cr)VEELK_              | 77  | 1 | AVKAYIAKVEELKKG  | P07108 | DBI     | Acyl-CoA-binding protein                                      | 79.3  | 142  | 5E-47  | AMKAYINKVEELKKG | 77  | K | 35.4 | 1E-04 |
| Q7ZV17 | actba   | Actin, cytoplasmic 1                                          | _M(ox)QK(cr)EITSLAPSTMK_      | 315 | 1 | GIADRMQKEITSLAP  | P62736 | ACTA2   | Actin, aortic smooth muscle                                   | 94.0  | 744  | 0E+00  | GIADRMQKEITALAP | 317 | K | 48.1 | 4E-09 |
| Q9I8V1 | actc1b  | Actin, alpha 1, skeletal muscle                               | _DLTDYLMK(cr)ILTER_           | 193 | 1 | DLTDYLMKILTERGY  | P68032 | ACTC1   | Actin, alpha cardiac muscle 1                                 | 98.9  | 785  | 0E+00  | DLTDYLMKILTERGY | 193 | K | 53.7 | 4E-11 |
| Q9I8V1 | actc1b  | Actin, alpha 1, skeletal muscle                               | _MQK(cr)EITALAPSTMK_          | 317 | 1 | GIADRMQKEITALAP  | P68032 | ACTC1   | Actin, alpha cardiac muscle 1                                 | 98.9  | 785  | 0E+00  | GIADRMQKEITALAP | 317 | K | 50.7 | 5E-10 |
| Q7ZV17 | actba   | Actin, cytoplasmic 1                                          | _MQK(cr)EITSLAPSTMK_          | 315 | 1 | GIADRMQKEITSLAP  | P68032 | ACTC1   | Actin, alpha cardiac muscle 1                                 | 94.0  | 746  | 0E+00  | GIADRMQKEITALAP | 317 | K | 48.1 | 4E-09 |
| Q9I8V1 | actc1b  | Actin, alpha 1, skeletal muscle                               | _IK(cr)IAPPER_                | 330 | 1 | APSTMKIKIAPPER   | P68032 | ACTC1   | Actin, alpha cardiac muscle 1                                 | 98.9  | 785  | 0E+00  | APSTMKIKIAPPER  | 330 | K | 51.5 | 3E-10 |
| Q6NUW5 | anp32e  | Acidic leucine-rich nuclear phosphoprotein 32 family member E | _ELSTLEALQNLK(cr)NLK_         | 113 | 1 | LEALQNLKNLKSLDL  | Q9BTT0 | ANP32E  | Acidic leucine-rich nuclear phosphoprotein 32 family member E | 82.4  | 248  | 2E-83  | VEALQNLKNLKSLDL | 115 | K | 46   | 2E-08 |
| Q6AZA0 | acat1   | Acetyl-CoA acetyltransferase, mitochondrial                   | _GAIDK(cr)AGIPVEEVK_          | 71  | 1 | AIKGAIDKAGIPVEE  | P24752 | ACAT1   | Acetyl-CoA acetyltransferase, mitochondrial                   | 78.0  | 681  | 0E+00  | AIQGAIEKAGIPKEE | 78  | K | 35   | 2E-04 |
| Q6AZA0 | acat1   | Acetyl-CoA acetyltransferase, mitochondrial                   | _LK(cr)AVFLK_                 | 261 | 1 | FSKVPKLVAVFLKEN  | P24752 | ACAT1   | Acetyl-CoA acetyltransferase, mitochondrial                   | 78.0  | 681  | 0E+00  | FSKVPKLVAVFLKEN | 268 | K | 41.8 | 7E-07 |
| Q6P3L3 | hspa5   | Heat shock protein 5                                          | _AVEEK(cr)IEWLEAHQDADLEEFQAK_ | 599 | 1 | IEKAVEEKIEWLEAH  | P11021 | HSPA5   | 78 kDa glucose-regulated protein                              | 93.4  | 1214 | 0E+00  | MEKAVEEKIEWLESH | 603 | K | 47.3 | 1E-07 |
| Q6PBZ1 | rpl7a   | OTTDARP00000018222                                            | _AALAK(cr)LVEAIK_             | 217 | 1 | EDKAALAKLVEAIKT  | P62424 | RPL7A   | 60S ribosomal protein L7a                                     | 92.4  | 479  | 1E-174 | EDKGALAKLVEAIRT | 217 | K | 41.4 | 2E-05 |
| Q6PBZ1 | rpl7a   | OTTDARP00000018222                                            | _AK(cr)ELATK_                 | 259 | 1 | KLEKAKAKELATKLG  | P62424 | RPL7A   | 60S ribosomal protein L7a                                     | 92.4  | 479  | 1E-174 | KLEKAKAKELATKLG | 259 | K | 46.9 | 2E-07 |
| Q7ZW95 | rpl4    | Ribosomal protein L4                                          | _SEEVQK(cr)AIR_               | 300 | 1 | IKSEEVQKAIRPANR  | P36578 | RPL4    | 60S ribosomal protein L4                                      | 85.3  | 588  | 0E+00  | -               | -   | - | -    | -     |
| Q6DGL9 | rpl38   | Ribosomal protein L38                                         | _QSLPPGLAVK(cr)ELK_           | 67  | 1 | LPPGLAVKELK____  | P63173 | RPL38   | 60S ribosomal protein L38                                     | 100.0 | 137  | 2E-45  | LPPGLAVKELK____ | 67  | K | 36.3 | 3E-05 |
| Q7ZWJ7 | rpl34   | 60S ribosomal protein L34                                     | _IVVK(cr)VLK_                 | 105 | 1 | EEQKIVVKVLKAAQ   | P49207 | RPL34   | 60S ribosomal protein L34                                     | 94.0  | 226  | 2E-79  | EEQKIVVKVLKAAQ  | 105 | K | 49.4 | 1E-09 |
| Q7ZV82 | rpl27   | 60S ribosomal protein L27                                     | _TVVVK(cr)DVFR_               | 98  | 1 | LDKTVVVKDVFRDPA  | P61353 | RPL27   | 60S ribosomal protein L27                                     | 95.6  | 266  | 2E-94  | LDKTVVVKDVFRDPA | 98  | K | 50.7 | 5E-10 |
| Q6P5L3 | rpl19   | 60S ribosomal protein L19                                     | _ILMEHIHK(cr)LK_              | 144 | 1 | ILMEHIHKLADKAR   | P84098 | RPL19   | 60S ribosomal protein L19                                     | 93.9  | 340  | 4E-122 | ILMEHIHKLADKAR  | 144 | K | 52.4 | 1E-10 |
| Q6P5L3 | rpl19   | 60S ribosomal protein L19                                     | _TLSK(cr)EDET_K_              | 190 | 1 | EIIKTLKSKEDETKK_ | P84098 | RPL19   | 60S ribosomal protein L19                                     | 94.0  | 341  | 3E-121 | EIIKTLKSKEETK_  | 190 | K | 44.3 | 7E-08 |
| E9QF69 | rpl18   | 60S ribosomal protein L18                                     | _IQNIPK(cr)LK_                | 97  | 1 | VRIQNIPKLVKCALC  | Q07020 | RPL18   | 60S ribosomal protein L18                                     | 84.8  | 291  | 3E-103 | VRVQEVPKLVKCALR | 97  | K | 38.8 | 8E-06 |
| E9QF69 | rpl18   | 60S ribosomal protein L18                                     | _SDAPFNK(cr)VILR_             | 45  | 1 | RSDAPFNKILRRFL   | Q07020 | RPL18   | 60S ribosomal protein L18                                     | 84.8  | 291  | 3E-103 | -               | -   | - | -    | -     |
| Q1LYB7 | rpl13a  | OTTDARP00000009674                                            | _MVVPAALK(cr)IVR_             | 127 | 1 | MVVPAALKIVRLKPT  | P40429 | RPL13A  | 60S ribosomal protein L13a                                    | 87.9  | 360  | 2E-129 | MVVPAALKIVRLKPT | 125 | K | 47.7 | 6E-09 |
| Q1LYB7 | rpl13a  | OTTDARP00000009674                                            | _NVESK(cr)IAVYTDVLK_          | 190 | 1 | AEKNVESKIAVYTDV  | P40429 | RPL13A  | 60S ribosomal protein L13a                                    | 87.9  | 360  | 2E-129 | AEKNVEKIDKYTEV  | 188 | K | 32.5 | 1E-03 |
